# Supplementary material for: Genomic exaptation and convergent evolution paved the way to independent subterranean colonization across beetle lineages
Source: Research Square preprint supplement (doi:10.21203/rs.3.rs-2254102/v1), 2022-11-17
Supplement: Supplementary file 1 [file 20870bf6226644aeeeaece41.xlsx]

## Sheet: BadiRate summary
OGs	Subterranan rates (SR)	Aquatic rates (AR)	Terrestrial rates (TR)
Total computed	14988	8995	10222
Total comparable	14978	8993	10217
Total significant	1394	225	13
Total contracted	833	178	13
Total expanded	571	47	0
Contracted more than the background	801	173	9
Contracted less than the background	32	5	4
Expanded more than the background	556	42	0
Expanded less than the background	15	5	0

## Sheet: All taxa analysis (SR)
Orthogroup	GR likelihood	GR AIC (K=3)	SR likelihood	SR AIC (K=6)	GR-SR	SR better-fitting than GR? = 1394 OGs	net rate in SR (BIRTH-DEATH)	Expanded or Contracted?	net rate in SR background (BIRTH-DEATH)	net rate SR - net rate SR background	More than background?
OG0000010	-157.448	320.896	-152.187	316.374	4.52149	TRUE	0.144669	EXPANDED	-0.768998	0.913667	TRUE
OG0000208	-90.9335	187.867	-81.8603	175.721	12.1464	TRUE	9.85564	EXPANDED	-0.503108	10.3587	TRUE
OG0000272	-83.2735	172.547	-79.2408	170.482	2.06544	TRUE	1.01564	EXPANDED	-4.95093	5.96657	TRUE
OG0000296	-69.6352	145.27	-63.949	139.898	5.37239	TRUE	1.00067	EXPANDED	0.0040322	0.996638	TRUE
OG0000330	-76.6806	159.361	-68.7741	149.548	9.81307	TRUE	1.94739	EXPANDED	0.323625	1.62376	TRUE
OG0000335	-61.3402	128.68	-56.478	124.956	3.72443	TRUE	0.368124	EXPANDED	-1e-07	0.368124	TRUE
OG0000355	-65.8387	137.677	-56.634	125.268	12.4096	TRUE	1.20842	EXPANDED	-0.174459	1.38288	TRUE
OG0000364	-66.3364	138.673	-61.7439	135.488	3.18502	TRUE	0.402939	EXPANDED	0.151964	0.250975	TRUE
OG0000394	-69.1946	144.389	-59.1912	130.382	14.0067	TRUE	0.949955	EXPANDED	0.155546	0.794409	TRUE
OG0000457	-59.6327	125.265	-53.3973	118.795	6.47065	TRUE	0.79712	EXPANDED	0.113082	0.684038	TRUE
OG0000467	-71.1198	148.24	-63.4605	138.921	9.31867	TRUE	1.33866	EXPANDED	0.31812	1.02054	TRUE
OG0000500	-64.3153	134.631	-42.0385	96.0769	38.5536	TRUE	3.20766	EXPANDED	2e-07	3.20766	TRUE
OG0000510	-63.64	133.28	-54.7949	121.59	11.6902	TRUE	1.39001	EXPANDED	-0.0704734	1.46048	TRUE
OG0000587	-62.473	130.946	-56.1281	124.256	6.68983	TRUE	0.560141	EXPANDED	0.0806766	0.479464	TRUE
OG0000646	-41.1656	88.3311	-33.9145	79.8289	8.50222	TRUE	0.858463	EXPANDED	0.0475259	0.810937	TRUE
OG0000647	-46.4939	98.9878	-39.9153	91.8307	7.15706	TRUE	0.065675	EXPANDED	0.0360447	0.0296303	TRUE
OG0000655	-56.6241	119.248	-48.3354	108.671	10.5774	TRUE	1.50011	EXPANDED	-0.0853455	1.58546	TRUE
OG0000659	-57.1565	120.313	-53.1534	118.307	2.00629	TRUE	1.3405	EXPANDED	-0.0747885	1.41529	TRUE
OG0000720	-69.8885	145.777	-64.7486	141.497	4.27989	TRUE	1.70997	EXPANDED	0.040409	1.66956	TRUE
OG0000747	-65.6765	137.353	-60.4823	132.965	4.38835	TRUE	1.8043	EXPANDED	0.284063	1.52024	TRUE
OG0000817	-69.2877	144.575	-59.7002	131.4	13.175	TRUE	0.186798	EXPANDED	0.359694	-0.172896	FALSE
OG0000842	-29.4331	64.8662	-22.3937	56.7875	8.07873	TRUE	0.834391	EXPANDED	-0.0181458	0.852537	TRUE
OG0000875	-72.8866	151.773	-66.5426	145.085	6.68786	TRUE	2.37679	EXPANDED	0.33901	2.03778	TRUE
OG0000894	-61.4962	128.992	-52.753	117.506	11.4863	TRUE	1.39494	EXPANDED	0.177964	1.21698	TRUE
OG0000907	-57.7904	121.581	-49.9127	111.825	9.75527	TRUE	1.01419	EXPANDED	0.229089	0.785101	TRUE
OG0000913	-61.1546	128.309	-56.4428	124.886	3.42355	TRUE	1.81863	EXPANDED	0.249466	1.56916	TRUE
OG0000914	-45.8074	97.6148	-35.5038	83.0076	14.6072	TRUE	1.69645	EXPANDED	-0.0209993	1.71745	TRUE
OG0000945	-65.7123	137.425	-52.9928	117.986	19.439	TRUE	5.49038	EXPANDED	0.167992	5.32239	TRUE
OG0001015	-66.0419	138.084	-57.5036	127.007	11.0765	TRUE	1.07404	EXPANDED	0.163891	0.910149	TRUE
OG0001041	-60.244	126.488	-53.478	118.956	7.53212	TRUE	0.321734	EXPANDED	0.264234	0.0575	TRUE
OG0001090	-62.1205	130.241	-55.7748	123.55	6.69135	TRUE	1.0629	EXPANDED	0.313855	0.749045	TRUE
OG0001115	-63.3095	132.619	-53.1023	118.205	14.4145	TRUE	4.76513	EXPANDED	0.242925	4.52221	TRUE
OG0001131	-55.1778	116.356	-46.2485	104.497	11.8587	TRUE	0.764464	EXPANDED	0.254614	0.50985	TRUE
OG0001133	-67.7184	141.437	-61.346	134.692	6.74489	TRUE	0.511182	EXPANDED	0.223224	0.287958	TRUE
OG0001138	-62.2313	130.463	-54.4392	120.878	9.58428	TRUE	1.27032	EXPANDED	0.186619	1.0837	TRUE
OG0001150	-60.3156	126.631	-51.8975	115.795	10.8363	TRUE	0.575401	EXPANDED	0.25708	0.318321	TRUE
OG0001167	-52.6592	111.318	-47.5176	107.035	4.28315	TRUE	1.22013	EXPANDED	0.133247	1.08688	TRUE
OG0001195	-62.8709	131.742	-54.1328	120.266	11.4762	TRUE	2.68496	EXPANDED	0.182134	2.50283	TRUE
OG0001208	-55.6634	117.327	-50.9622	113.924	3.40257	TRUE	0.993619	EXPANDED	-0.128342	1.12196	TRUE
OG0001248	-63.8625	133.725	-58.0939	128.188	5.53716	TRUE	1.78177	EXPANDED	0.2803	1.50147	TRUE
OG0001255	-64.0032	134.006	-54.1699	120.34	13.6666	TRUE	3.21778	EXPANDED	0.213779	3.004	TRUE
OG0001271	-62.3574	130.715	-56.7679	125.536	5.17885	TRUE	1.9299	EXPANDED	-0.052751	1.98265	TRUE
OG0001286	-53.6595	113.319	-49.1121	110.224	3.09468	TRUE	0.580536	EXPANDED	0.283687	0.296849	TRUE
OG0001295	-42.0794	90.1588	-37.4784	86.9567	3.20206	TRUE	0.893436	EXPANDED	-0.0790004	0.972436	TRUE
OG0001296	-57.0392	120.078	-51.5769	115.154	4.92468	TRUE	1.53324	EXPANDED	0.170455	1.36278	TRUE
OG0001301	-55.7263	117.453	-51.2625	114.525	2.92751	TRUE	1.06812	EXPANDED	0.0023968	1.06572	TRUE
OG0001305	-60.9968	127.994	-56.9078	125.816	2.17794	TRUE	3.78544	EXPANDED	0.164506	3.62093	TRUE
OG0001306	-57.0947	120.189	-50.7257	113.451	6.73808	TRUE	3.57076	EXPANDED	-0.183707	3.75447	TRUE
OG0001315	-55.2816	116.563	-50.3268	112.654	3.90953	TRUE	0.91901	EXPANDED	0.118514	0.800496	TRUE
OG0001323	-65.7224	137.445	-56.4587	124.917	12.5275	TRUE	2.62033	EXPANDED	0.234537	2.38579	TRUE
OG0001346	-55.3799	116.76	-49.6423	111.285	5.47526	TRUE	1.06108	EXPANDED	0.0680918	0.992988	TRUE
OG0001353	-58.7449	123.49	-52.3493	116.699	6.79121	TRUE	3.06043	EXPANDED	0.162171	2.89826	TRUE
OG0001356	-60.1374	126.275	-55.0598	122.12	4.1551	TRUE	2.42209	EXPANDED	0.237879	2.18421	TRUE
OG0001381	-42.6495	91.299	-37.225	86.45	4.84893	TRUE	1.22096	EXPANDED	0.163933	1.05703	TRUE
OG0001385	-60.9042	127.808	-56.263	124.526	3.28227	TRUE	0.823181	EXPANDED	0.273134	0.550047	TRUE
OG0001396	-62.7626	131.525	-58.0643	128.129	3.39661	TRUE	3.20181	EXPANDED	0.202256	2.99955	TRUE
OG0001407	-58.1952	122.39	-51.8119	115.624	6.76664	TRUE	2.30787	EXPANDED	0.114747	2.19312	TRUE
OG0001413	-57.2301	120.46	-50.2416	112.483	7.97684	TRUE	0.0587025	EXPANDED	0.214364	-0.155662	FALSE
OG0001416	-50.1992	106.398	-45.7643	103.529	2.86977	TRUE	1.53145	EXPANDED	0.0240893	1.50736	TRUE
OG0001420	-52.3501	110.7	-47.6219	107.244	3.45643	TRUE	0.515667	EXPANDED	-0.0225632	0.53823	TRUE
OG0001429	-58.4239	122.848	-52.1182	116.236	6.61147	TRUE	0.675137	EXPANDED	0.22563	0.449507	TRUE
OG0001431	-46.3698	98.7397	-42.1728	96.3456	2.39405	TRUE	1.40067	EXPANDED	-0.0660915	1.46676	TRUE
OG0001434	-50.5387	107.077	-45.5682	103.136	3.94105	TRUE	0.767559	EXPANDED	-0.0410647	0.808624	TRUE
OG0001477	-54.4713	114.943	-50.295	112.59	2.35255	TRUE	3.05485	EXPANDED	0.22989	2.82496	TRUE
OG0001480	-58.8078	123.616	-48.9919	109.984	13.6317	TRUE	1.63937	EXPANDED	0.211151	1.42822	TRUE
OG0001491	-55.4137	116.827	-46.3184	104.637	12.1906	TRUE	0.45211	EXPANDED	-0.120827	0.572937	TRUE
OG0001494	-58.8584	123.717	-48.0327	108.065	15.6513	TRUE	0.652024	EXPANDED	0.215998	0.436026	TRUE
OG0001498	-58.7308	123.462	-52.9521	117.904	5.5574	TRUE	0.238743	EXPANDED	0.179635	0.059108	TRUE
OG0001511	-55.8227	117.645	-47.859	107.718	9.92737	TRUE	3.59264	EXPANDED	-2.63e-05	3.59267	TRUE
OG0001545	-52.9164	111.833	-48.1092	108.218	3.61454	TRUE	2.10481	EXPANDED	0.0001791	2.10463	TRUE
OG0001556	-56.6368	119.274	-49.9859	111.972	7.30176	TRUE	0.46905	EXPANDED	0.136562	0.332488	TRUE
OG0001581	-54.4252	114.85	-46.6834	105.367	9.48368	TRUE	0.0691752	EXPANDED	0.123405	-0.0542298	FALSE
OG0001589	-58.7914	123.583	-50.6451	113.29	10.2926	TRUE	0.40127	EXPANDED	0.27808	0.12319	TRUE
OG0001596	-52.3755	110.751	-42.4053	96.8105	13.9405	TRUE	0.62457	EXPANDED	0.199068	0.425502	TRUE
OG0001605	-59.2849	124.57	-44.1481	100.296	24.2736	TRUE	2.66005	EXPANDED	0.159845	2.50021	TRUE
OG0001614	-54.1672	114.334	-44.329	100.658	13.6765	TRUE	0.827713	EXPANDED	-0.110449	0.938162	TRUE
OG0001621	-55.3763	116.753	-49.1968	110.394	6.35893	TRUE	1.57183	EXPANDED	0.172814	1.39902	TRUE
OG0001628	-51.8814	109.763	-42.9818	97.9636	11.7992	TRUE	0.420427	EXPANDED	0.170126	0.250301	TRUE
OG0001634	-55.0885	116.177	-50.063	112.126	4.05097	TRUE	0.326712	EXPANDED	0.130235	0.196477	TRUE
OG0001641	-54.6464	115.293	-45.261	102.522	12.7709	TRUE	1.56228	EXPANDED	0.0761538	1.48613	TRUE
OG0001647	-55.0996	116.199	-49.2213	110.443	5.75658	TRUE	1.34421	EXPANDED	0.167172	1.17704	TRUE
OG0001659	-55.4927	116.985	-47.8273	107.655	9.33066	TRUE	2.2669	EXPANDED	0.170973	2.09593	TRUE
OG0001666	-47.8238	101.648	-42.4356	96.8711	4.77647	TRUE	0.0755694	EXPANDED	0.153877	-0.0783076	FALSE
OG0001674	-57.2758	120.552	-50.6843	113.369	7.18292	TRUE	1.25764	EXPANDED	0.207481	1.05016	TRUE
OG0001683	-58.7275	123.455	-53.9375	119.875	3.57991	TRUE	2.46868	EXPANDED	0.202768	2.26591	TRUE
OG0001684	-53.2919	112.584	-49.0544	110.109	2.47504	TRUE	0.734495	EXPANDED	0.151925	0.58257	TRUE
OG0001685	-55.6956	117.391	-48.3558	108.712	8.67956	TRUE	1.40255	EXPANDED	0.028848	1.3737	TRUE
OG0001692	-15.2896	36.5791	-10.9587	33.9173	2.66182	TRUE	15.9005	EXPANDED	-1.50851	17.409	TRUE
OG0001704	-53.033	112.066	-45.846	103.692	8.3741	TRUE	0.0582987	EXPANDED	0.108215	-0.0499163	FALSE
OG0001708	-49.8464	105.693	-40.433	92.866	12.8268	TRUE	0.511021	EXPANDED	-0.0264433	0.537464	TRUE
OG0001720	-52.294	110.588	-43.3607	98.7214	11.8666	TRUE	0.678715	EXPANDED	0.196801	0.481914	TRUE
OG0001722	-56.8341	119.668	-52.2176	116.435	3.23305	TRUE	0.70424	EXPANDED	0.0961803	0.60806	TRUE
OG0001727	-53.7078	113.416	-49.2438	110.488	2.92802	TRUE	1.2221	EXPANDED	-0.0363134	1.25841	TRUE
OG0001728	-56.4684	118.937	-42.3788	96.7576	22.1792	TRUE	0.404665	EXPANDED	0.21518	0.189485	TRUE
OG0001733	-49.8198	105.64	-42.1786	96.3571	9.28243	TRUE	0.444049	EXPANDED	1e-07	0.444049	TRUE
OG0001746	-49.4398	104.88	-42.3562	96.7125	8.16717	TRUE	1.95681	EXPANDED	0.231977	1.72483	TRUE
OG0001758	-56.8774	119.755	-50.7703	113.541	6.21417	TRUE	0.971993	EXPANDED	-0.0862113	1.0582	TRUE
OG0001786	-52.5358	111.072	-42.2917	96.5834	14.4883	TRUE	0.106976	EXPANDED	0	0.106976	TRUE
OG0001791	-39.5951	85.1902	-33.1482	78.2964	6.89387	TRUE	1.97316	EXPANDED	0.025881	1.94728	TRUE
OG0001795	-52.1278	110.256	-44.4978	100.996	9.2599	TRUE	2.29918	EXPANDED	0.17235	2.12683	TRUE
OG0001799	-51.6848	109.37	-47.0354	106.071	3.29878	TRUE	1.70087	EXPANDED	-0.0447537	1.74562	TRUE
OG0001801	-50.5623	107.125	-45.424	102.848	4.27653	TRUE	1.43965	EXPANDED	0.0567058	1.38294	TRUE
OG0001804	-54.2051	114.41	-46.1362	104.272	10.1378	TRUE	0.895093	EXPANDED	0.12995	0.765143	TRUE
OG0001810	-49.5416	105.083	-42.7721	97.5443	7.53888	TRUE	1.5234	EXPANDED	0.109633	1.41377	TRUE
OG0001819	-55.3873	116.775	-39.1401	90.2802	26.4943	TRUE	2.18615	EXPANDED	0.0606415	2.12551	TRUE
OG0001824	-53.6664	113.333	-45.1752	102.35	10.9823	TRUE	1.59844	EXPANDED	0.209275	1.38917	TRUE
OG0001825	-54.8504	115.701	-46.7385	105.477	10.2239	TRUE	0.346728	EXPANDED	0.169	0.177728	TRUE
OG0001848	-55.8433	117.687	-49.9406	111.881	5.80536	TRUE	3.68896	EXPANDED	0.281195	3.40776	TRUE
OG0001864	-49.1853	104.371	-44.3809	100.762	3.60883	TRUE	0.447981	EXPANDED	0.0081765	0.439805	TRUE
OG0001871	-40.5812	87.1624	-35.5672	83.1344	4.02796	TRUE	0.712392	EXPANDED	-0.183491	0.895883	TRUE
OG0001891	-49.0841	104.168	-43.5314	99.0627	5.10543	TRUE	1.52857	EXPANDED	0.207205	1.32136	TRUE
OG0001900	-53.686	113.372	-44.8831	101.766	11.6059	TRUE	1.20433	EXPANDED	0.1665	1.03783	TRUE
OG0001906	-52.6222	111.244	-46.6663	105.333	5.91176	TRUE	1.15039	EXPANDED	-0.0411838	1.19157	TRUE
OG0001916	-53.8148	113.63	-46.6106	105.221	8.4085	TRUE	2.44751	EXPANDED	-0.0303042	2.47781	TRUE
OG0001923	-50.3091	106.618	-37.6474	87.2949	19.3234	TRUE	1.48062	EXPANDED	0.10049	1.38013	TRUE
OG0001929	-50.9326	107.865	-46.8068	105.614	2.2517	TRUE	0.902766	EXPANDED	-0.121871	1.02464	TRUE
OG0001933	-48.9847	103.969	-42.7598	97.5196	6.44985	TRUE	0.418252	EXPANDED	-0.0336929	0.451945	TRUE
OG0001946	-52.2642	110.528	-46.2384	104.477	6.05158	TRUE	0.653646	EXPANDED	0.200536	0.45311	TRUE
OG0001947	-48.2482	102.496	-39.1249	90.2499	12.2466	TRUE	1.35468	EXPANDED	0.0346363	1.32004	TRUE
OG0001954	-42.782	91.564	-35.9499	83.8999	7.66411	TRUE	0.514388	EXPANDED	0	0.514388	TRUE
OG0001955	-46.03	98.06	-41.1746	94.3492	3.71075	TRUE	0.722441	EXPANDED	0.0001688	0.722272	TRUE
OG0001965	-55.1625	116.325	-43.6132	99.2263	17.0986	TRUE	0.667182	EXPANDED	0.0182583	0.648924	TRUE
OG0001975	-51.5688	109.138	-46.1992	104.398	4.73932	TRUE	0.234459	EXPANDED	0.195846	0.038613	TRUE
OG0001976	-53.1144	112.229	-46.0998	104.2	8.02912	TRUE	0.929639	EXPANDED	0.165996	0.763643	TRUE
OG0001981	-49.0668	104.134	-44.0965	100.193	3.94063	TRUE	0.342208	EXPANDED	0.0535709	0.288637	TRUE
OG0001988	-52.6399	111.28	-38.5652	89.1304	22.1493	TRUE	1.39481	EXPANDED	0.0059962	1.38881	TRUE
OG0001990	-53.7225	113.445	-43.2046	98.4092	15.0358	TRUE	4.56071	EXPANDED	-0.0272281	4.58794	TRUE
OG0001994	-52.6903	111.381	-39.1338	90.2676	21.1131	TRUE	1.69437	EXPANDED	0.174098	1.52027	TRUE
OG0002009	-51.3082	108.616	-47.2263	106.453	2.16381	TRUE	1.47678	EXPANDED	-0.0046664	1.48145	TRUE
OG0002014	-53.4431	112.886	-41.1023	94.2045	18.6816	TRUE	1.27836	EXPANDED	-0.215981	1.49434	TRUE
OG0002016	-53.2991	112.598	-48.9295	109.859	2.73933	TRUE	0.0340158	EXPANDED	-0.0502916	0.0843074	TRUE
OG0002041	-56.7296	119.459	-51.0948	114.19	5.26945	TRUE	2.4365	EXPANDED	0.189911	2.24659	TRUE
OG0002049	-56.0396	118.079	-50.5141	113.028	5.05093	TRUE	0.170771	EXPANDED	0.150809	0.019962	TRUE
OG0002050	-53.522	113.044	-45.3139	102.628	10.4162	TRUE	0.065141	EXPANDED	0.14474	-0.079599	FALSE
OG0002054	-45.0447	96.0894	-39.5873	91.1745	4.91484	TRUE	1.32868	EXPANDED	0.11125	1.21743	TRUE
OG0002059	-41.4874	88.9747	-35.9506	83.9012	5.07348	TRUE	5.4e-06	EXPANDED	0.214604	-0.214599	FALSE
OG0002070	-44.8594	95.7188	-35.9217	83.8435	11.8754	TRUE	1.68497	EXPANDED	0.154738	1.53023	TRUE
OG0002077	-53.4613	112.923	-47.7672	107.534	5.38834	TRUE	1.51071	EXPANDED	0.138207	1.3725	TRUE
OG0002079	-52.5352	111.07	-46.5375	105.075	5.99524	TRUE	1.13069	EXPANDED	0.186648	0.944042	TRUE
OG0002082	-43.8003	93.6006	-38.2759	88.5519	5.04873	TRUE	0.256261	EXPANDED	0.120336	0.135925	TRUE
OG0002085	-52.4041	110.808	-45.8081	103.616	7.19186	TRUE	1.02957	EXPANDED	0.193355	0.836215	TRUE
OG0002090	-45.842	97.684	-40.5184	93.0368	4.64723	TRUE	0.323576	EXPANDED	0.175991	0.147585	TRUE
OG0002091	-41.2524	88.5047	-34.4768	80.9535	7.55122	TRUE	0.1628	EXPANDED	0.0520758	0.110724	TRUE
OG0002093	-42.6574	91.3148	-36.3648	84.7296	6.58524	TRUE	1.38771	EXPANDED	0.0959773	1.29173	TRUE
OG0002105	-48.7103	103.421	-33.7309	79.4618	23.9587	TRUE	1.34443	EXPANDED	0.101837	1.24259	TRUE
OG0002113	-56.3263	118.653	-50.6792	113.358	5.29413	TRUE	1.10119	EXPANDED	-0.0539982	1.15519	TRUE
OG0002124	-51.2853	108.571	-40.839	93.678	14.8926	TRUE	2.39835	EXPANDED	-0.0298074	2.42816	TRUE
OG0002129	-46.3835	98.7669	-41.3278	94.6557	4.11122	TRUE	2.03067	EXPANDED	0.134083	1.89659	TRUE
OG0002131	-51.3001	108.6	-44.2764	100.553	8.04749	TRUE	0.649166	EXPANDED	0.114136	0.53503	TRUE
OG0002135	-52.1932	110.386	-45.3787	102.757	7.62911	TRUE	1.70602	EXPANDED	-0.0599929	1.76601	TRUE
OG0002136	-49.1855	104.371	-42.347	96.6939	7.67705	TRUE	0.622659	EXPANDED	0.155301	0.467358	TRUE
OG0002137	-53.8739	113.748	-45.4127	102.825	10.9224	TRUE	0.472432	EXPANDED	0.140086	0.332346	TRUE
OG0002139	-53.5954	113.191	-42.8428	97.6855	15.5053	TRUE	2.81598	EXPANDED	0.0278874	2.78809	TRUE
OG0002158	-48.9161	103.832	-43.2865	98.5731	5.25918	TRUE	2.26451	EXPANDED	0.156353	2.10816	TRUE
OG0002169	-54.3469	114.694	-44.3756	100.751	13.9427	TRUE	1.46618	EXPANDED	-0.0005721	1.46675	TRUE
OG0002172	-53.1478	112.296	-44.0958	100.192	12.104	TRUE	2.38027	EXPANDED	-0.0286125	2.40888	TRUE
OG0002181	-54.5851	115.17	-48.4753	108.951	6.21959	TRUE	2.16964	EXPANDED	0.166731	2.00291	TRUE
OG0002185	-48.9931	103.986	-42.6254	97.2507	6.73548	TRUE	1.2711	EXPANDED	0.0843381	1.18676	TRUE
OG0002217	-51.5647	109.129	-41.0202	94.0405	15.0889	TRUE	2.00003	EXPANDED	0.156192	1.84384	TRUE
OG0002220	-36.3725	78.7451	-30.1673	72.3346	6.41046	TRUE	0.404688	EXPANDED	0.129071	0.275617	TRUE
OG0002226	-51.1498	108.3	-43.4703	98.9406	9.35898	TRUE	0.972221	EXPANDED	0.158525	0.813696	TRUE
OG0002227	-47.8654	101.731	-41.3965	94.793	6.93788	TRUE	0.80834	EXPANDED	0.129505	0.678835	TRUE
OG0002238	-48.7557	103.511	-42.9071	97.8141	5.69721	TRUE	1.90588	EXPANDED	0.151648	1.75423	TRUE
OG0002241	-49.0653	104.131	-41.0328	94.0656	10.065	TRUE	1.12909	EXPANDED	0.104943	1.02415	TRUE
OG0002248	-38.1535	82.307	-28.6408	69.2815	13.0255	TRUE	2.00895	EXPANDED	0.0597535	1.9492	TRUE
OG0002252	-39.4899	84.9797	-34.436	80.872	4.10778	TRUE	0.680046	EXPANDED	-0.112597	0.792643	TRUE
OG0002253	-51.6742	109.348	-46.6311	105.262	4.08621	TRUE	0.0855954	EXPANDED	0.121997	-0.0364016	FALSE
OG0002266	-48.533	103.066	-37.1462	86.2924	16.7735	TRUE	2.45167	EXPANDED	0.0948461	2.35682	TRUE
OG0002269	-47.2824	100.565	-37.2931	86.5862	13.9787	TRUE	1.4473	EXPANDED	0.11647	1.33083	TRUE
OG0002274	-27.3919	60.7837	-23.1079	58.2157	2.56802	TRUE	0.321158	EXPANDED	0.0601189	0.261039	TRUE
OG0002278	-47.3209	100.642	-38.6833	89.3666	11.2752	TRUE	0.312126	EXPANDED	0.130746	0.18138	TRUE
OG0002281	-38.7464	83.4927	-29.707	71.414	12.0788	TRUE	0.85484	EXPANDED	0.117765	0.737075	TRUE
OG0002283	-52.6413	111.283	-32.662	77.324	33.9586	TRUE	2.16135	EXPANDED	6e-07	2.16135	TRUE
OG0002292	-47.4565	100.913	-35.5219	83.0438	17.8692	TRUE	1.81756	EXPANDED	3.23e-05	1.81753	TRUE
OG0002295	-52.2175	110.435	-39.9625	91.9251	18.5099	TRUE	1.09173	EXPANDED	0.125072	0.966658	TRUE
OG0002297	-44.1584	94.3167	-39.5536	91.1072	3.20951	TRUE	1.3453	EXPANDED	-0.0168014	1.3621	TRUE
OG0002318	-50.6917	107.383	-39.9465	91.893	15.4904	TRUE	1.45345	EXPANDED	-0.0226185	1.47607	TRUE
OG0002332	-49.9891	105.978	-44.6503	101.301	4.67761	TRUE	1.0744	EXPANDED	-0.183376	1.25778	TRUE
OG0002333	-53.4416	112.883	-43.96	99.92	12.9632	TRUE	1.7487	EXPANDED	0.144274	1.60443	TRUE
OG0002339	-39.986	85.9719	-35.6603	83.3206	2.65132	TRUE	1.55858	EXPANDED	0.0272101	1.53137	TRUE
OG0002341	-51.1892	108.378	-46.7151	105.43	2.94812	TRUE	0.586901	EXPANDED	0.0599782	0.526923	TRUE
OG0002356	-46.5585	99.117	-36.4804	84.9609	14.1561	TRUE	1.49278	EXPANDED	-0.0262681	1.51905	TRUE
OG0002365	-52.982	111.964	-47.3829	106.766	5.1982	TRUE	1.65625	EXPANDED	0.130163	1.52609	TRUE
OG0002403	-49.5124	105.025	-34.054	80.108	24.9168	TRUE	3.75659	EXPANDED	-0.0419438	3.79853	TRUE
OG0002405	-51.4825	108.965	-43.7902	99.5805	9.3846	TRUE	0.445999	EXPANDED	0.056671	0.389328	TRUE
OG0002412	-46.1535	98.3071	-41.286	94.5721	3.73499	TRUE	1.30284	EXPANDED	0.0177536	1.28509	TRUE
OG0002414	-47.3797	100.759	-38.8003	89.6007	11.1587	TRUE	1.16434	EXPANDED	-0.0243745	1.18871	TRUE
OG0002416	-42.0206	90.0411	-29.0108	70.0216	20.0195	TRUE	0.785845	EXPANDED	7e-07	0.785844	TRUE
OG0002418	-35.9937	77.9873	-31.0881	74.1761	3.81122	TRUE	1.32631	EXPANDED	0.0304738	1.29584	TRUE
OG0002426	-41.809	89.6181	-35.9495	83.899	5.71913	TRUE	0.790733	EXPANDED	0.0959936	0.694739	TRUE
OG0002443	-39.9729	85.9458	-33.7991	79.5982	6.34762	TRUE	0.393678	EXPANDED	0.154624	0.239054	TRUE
OG0002451	-42.6192	91.2385	-36.5402	85.0805	6.15799	TRUE	0.0422885	EXPANDED	0.109239	-0.0669505	FALSE
OG0002452	-42.0896	90.1793	-35.9547	83.9095	6.2698	TRUE	0.319349	EXPANDED	0.151975	0.167374	TRUE
OG0002453	-46.416	98.832	-40.3487	92.6974	6.1346	TRUE	0.228645	EXPANDED	0.0516479	0.176997	TRUE
OG0002479	-46.1828	98.3656	-37.3786	86.7571	11.6085	TRUE	0.84143	EXPANDED	-0.0252332	0.866663	TRUE
OG0002483	-48.3745	102.749	-44.3037	100.607	2.14153	TRUE	0.73219	EXPANDED	-0.0434742	0.775664	TRUE
OG0002490	-36.3192	78.6385	-30.753	73.5059	5.13258	TRUE	0.939284	EXPANDED	-1e-07	0.939284	TRUE
OG0002500	-45.5383	97.0767	-39.9383	91.8766	5.20005	TRUE	0.306225	EXPANDED	0.129699	0.176526	TRUE
OG0002502	-35.3961	76.7922	-30.8224	73.6449	3.14729	TRUE	1.89464	EXPANDED	0.0239717	1.87067	TRUE
OG0002503	-43.5479	93.0958	-37.5652	87.1305	5.96535	TRUE	0.600255	EXPANDED	-0.134037	0.734292	TRUE
OG0002506	-32.0458	70.0917	-26.901	65.802	4.28964	TRUE	1.32786	EXPANDED	0.126218	1.20164	TRUE
OG0002508	-46.4516	98.9031	-37.5933	87.1867	11.7164	TRUE	0.554637	EXPANDED	0.0215861	0.533051	TRUE
OG0002512	-48.9041	103.808	-33.1343	78.2687	25.5395	TRUE	3.34625	EXPANDED	1.16e-05	3.34624	TRUE
OG0002531	-37.3285	80.657	-32.4474	76.8947	3.76234	TRUE	1.22695	EXPANDED	0.0547803	1.17217	TRUE
OG0002533	-47.3736	100.747	-41.8404	95.6809	5.06627	TRUE	1.61154	EXPANDED	0.129659	1.48188	TRUE
OG0002536	-53.5232	113.046	-46.8794	105.759	7.28766	TRUE	2.28488	EXPANDED	0.086453	2.19843	TRUE
OG0002539	-49.1156	104.231	-44.5572	101.114	3.11679	TRUE	2.07936	EXPANDED	-0.0986663	2.17803	TRUE
OG0002572	-41.6205	89.2411	-37.2887	86.5774	2.6637	TRUE	0.14071	EXPANDED	-0.0252738	0.165984	TRUE
OG0002574	-37.0335	80.0669	-29.8617	71.7234	8.34349	TRUE	0.788493	EXPANDED	-0.0002063	0.788699	TRUE
OG0002579	-39.5441	85.0882	-30.6845	73.369	11.7192	TRUE	0.230741	EXPANDED	-0.0006599	0.231401	TRUE
OG0002580	-34.1101	74.2202	-25.8632	63.7264	10.4938	TRUE	1.9528	EXPANDED	0.0017049	1.9511	TRUE
OG0002586	-47.5901	101.18	-32.6969	77.3938	23.7865	TRUE	2.57771	EXPANDED	0.0634326	2.51428	TRUE
OG0002594	-43.0903	92.1806	-35.7832	83.5664	8.61424	TRUE	0.150566	EXPANDED	0.0829952	0.0675708	TRUE
OG0002610	-49.9085	105.817	-34.6652	81.3304	24.4867	TRUE	1.52139	EXPANDED	-0.0210258	1.54242	TRUE
OG0002611	-47.6454	101.291	-37.2868	86.5736	14.7173	TRUE	0.90853	EXPANDED	0.0859897	0.82254	TRUE
OG0002616	-41.5731	89.1462	-27.1002	66.2003	22.9458	TRUE	1.58582	EXPANDED	0.0890497	1.49677	TRUE
OG0002620	-51.7739	109.548	-42.8938	97.7877	11.7602	TRUE	1.46813	EXPANDED	0.100637	1.36749	TRUE
OG0002630	-42.6387	91.2775	-35.6945	83.3891	7.88842	TRUE	0.263168	EXPANDED	0.133474	0.129694	TRUE
OG0002650	-47.4125	100.825	-39.4914	90.9827	9.84222	TRUE	1.74401	EXPANDED	-0.0530317	1.79704	TRUE
OG0002668	-41.5348	89.0697	-33.9282	79.8564	9.21327	TRUE	0.533716	EXPANDED	0.0945756	0.43914	TRUE
OG0002670	-45.6065	97.213	-35.6112	83.2225	13.9906	TRUE	1.4153	EXPANDED	0.0868586	1.32844	TRUE
OG0002673	-47.4863	100.973	-30.2944	72.5887	28.3839	TRUE	2.58088	EXPANDED	0.0758801	2.505	TRUE
OG0002680	-42.9331	91.8662	-36.0854	84.1708	7.69538	TRUE	0.252259	EXPANDED	0.0142539	0.238005	TRUE
OG0002683	-50.2729	106.546	-43.5015	99.0031	7.54276	TRUE	1.77368	EXPANDED	0.0573572	1.71632	TRUE
OG0002709	-49.3366	104.673	-30.1045	72.2089	32.4643	TRUE	0.729313	EXPANDED	0	0.729313	TRUE
OG0002710	-40.6318	87.2636	-32.0527	76.1054	11.1582	TRUE	1.89125	EXPANDED	6.3e-06	1.89124	TRUE
OG0002720	-35.1307	76.2613	-30.4859	72.9719	3.28948	TRUE	1.74769	EXPANDED	0.0007942	1.7469	TRUE
OG0002732	-51.0914	108.183	-46.8931	105.786	2.3967	TRUE	2.31979	EXPANDED	-0.0589854	2.37878	TRUE
OG0002736	-46.8939	99.7877	-39.9264	91.8529	7.93487	TRUE	1.16431	EXPANDED	-0.0128251	1.17714	TRUE
OG0002740	-52.2629	110.526	-42.2445	96.4889	14.0368	TRUE	1.0047	EXPANDED	0.105888	0.898812	TRUE
OG0002741	-44.4086	94.8172	-36.3691	84.7381	10.0791	TRUE	0.549476	EXPANDED	0.103882	0.445594	TRUE
OG0002743	-49.1859	104.372	-41.753	95.506	8.86587	TRUE	1.55244	EXPANDED	-0.0539522	1.60639	TRUE
OG0002746	-35.2684	76.5368	-29.1554	70.3109	6.22589	TRUE	1.21388	EXPANDED	-0.0225516	1.23643	TRUE
OG0002761	-36.4499	78.8998	-32.3021	76.6042	2.29564	TRUE	0.193715	EXPANDED	0.147612	0.046103	TRUE
OG0002767	-40.3226	86.6451	-29.0206	70.0411	16.604	TRUE	0.3327	EXPANDED	0.0013722	0.331328	TRUE
OG0002771	-33.3964	72.7927	-28.0586	68.1172	4.67559	TRUE	0.741327	EXPANDED	0.105539	0.635788	TRUE
OG0002775	-45.4439	96.8879	-38.5245	89.0491	7.83877	TRUE	0.0777304	EXPANDED	-0.0469993	0.12473	TRUE
OG0002782	-46.2437	98.4875	-33.3658	78.7315	19.7559	TRUE	1.88211	EXPANDED	-0.0205662	1.90268	TRUE
OG0002786	-43.6963	93.3926	-32.9277	77.8553	15.5372	TRUE	2.06651	EXPANDED	0.0788358	1.98767	TRUE
OG0002817	-40.4989	86.9979	-34.1329	80.2658	6.73206	TRUE	1.05316	EXPANDED	2.7e-06	1.05316	TRUE
OG0002831	-37.8254	81.6508	-32.9864	77.9729	3.67795	TRUE	0.805259	EXPANDED	0.105836	0.699423	TRUE
OG0002863	-46.2347	98.4695	-22.7719	57.5439	40.9256	TRUE	1.46414	EXPANDED	0.0498721	1.41427	TRUE
OG0002882	-32.9749	71.9498	-27.9269	67.8537	4.09609	TRUE	1.39544	EXPANDED	0.0927488	1.30269	TRUE
OG0002891	-36.6984	79.3968	-29.3618	70.7236	8.67322	TRUE	1.14637	EXPANDED	0.103631	1.04274	TRUE
OG0002896	-35.0202	76.0404	-29.5503	71.1007	4.9397	TRUE	0.974632	EXPANDED	0.0906337	0.883998	TRUE
OG0002899	-48.7045	103.409	-29.9044	71.8089	31.6001	TRUE	0.260983	EXPANDED	-0.0082451	0.269228	TRUE
OG0002912	-46.7235	99.4469	-38.7331	89.4662	9.98067	TRUE	0.744558	EXPANDED	0	0.744558	TRUE
OG0002915	-40.4308	86.8617	-26.5542	65.1083	21.7534	TRUE	0.236514	EXPANDED	0.0648295	0.171685	TRUE
OG0002926	-31.7079	69.4159	-26.5786	65.1572	4.25864	TRUE	0.93503	EXPANDED	0.0936914	0.841339	TRUE
OG0002935	-43.5532	93.1065	-33.1037	78.2075	14.899	TRUE	1.70578	EXPANDED	-0.0255482	1.73133	TRUE
OG0002939	-39.9953	85.9905	-32.9303	77.8606	8.12989	TRUE	0.411304	EXPANDED	0.0794229	0.331881	TRUE
OG0002945	-44.7098	95.4196	-38.382	88.764	6.65557	TRUE	1.11467	EXPANDED	-0.0451041	1.15977	TRUE
OG0002948	-36.5382	79.0764	-32.4507	76.9015	2.17493	TRUE	0.167991	EXPANDED	0.0457855	0.122205	TRUE
OG0002956	-48.8021	103.604	-43.0239	98.0479	5.55627	TRUE	2.58189	EXPANDED	-0.0419894	2.62388	TRUE
OG0002960	-42.1906	90.3813	-34.9618	81.9236	8.45769	TRUE	1.71093	EXPANDED	-0.0507599	1.76169	TRUE
OG0002964	-46.9219	99.8439	-42.351	96.7021	3.14177	TRUE	0.701656	EXPANDED	-0.094689	0.796345	TRUE
OG0002968	-47.1494	100.299	-28.0444	68.0888	32.21	TRUE	2.86845	EXPANDED	-0.0031206	2.87157	TRUE
OG0002969	-30.73	67.46	-25.6655	63.3309	4.1291	TRUE	0.805278	EXPANDED	0	0.805278	TRUE
OG0002970	-34.0372	74.0745	-29.5693	71.1387	2.93578	TRUE	0.163613	EXPANDED	0.100231	0.063382	TRUE
OG0002975	-38.4804	82.9609	-29.3474	70.6947	12.2661	TRUE	0.0481121	EXPANDED	0.0023521	0.04576	TRUE
OG0002980	-47.5245	101.049	-35.8166	83.6333	17.4158	TRUE	1.45672	EXPANDED	-0.0424304	1.49915	TRUE
OG0002983	-29.9894	65.9789	-24.8671	61.7342	4.24469	TRUE	0.256167	EXPANDED	0.0851795	0.170987	TRUE
OG0002988	-44.9131	95.8262	-36.7152	85.4304	10.3958	TRUE	1.48858	EXPANDED	-0.0236311	1.51221	TRUE
OG0002994	-44.481	94.962	-39.1982	90.3963	4.56565	TRUE	1.84785	EXPANDED	0.0056564	1.84219	TRUE
OG0003013	-34.7559	75.5118	-30.4847	72.9695	2.54231	TRUE	0.0597873	EXPANDED	0.0980992	-0.0383119	FALSE
OG0003017	-39.2577	84.5153	-27.8173	67.6346	16.8808	TRUE	0.76203	EXPANDED	0.113296	0.648734	TRUE
OG0003019	-51.2045	108.409	-44.4162	100.832	7.57664	TRUE	1.656	EXPANDED	-0.0846495	1.74065	TRUE
OG0003020	-46.9096	99.8191	-38.3832	88.7665	11.0526	TRUE	1.02558	EXPANDED	-0.0245661	1.05015	TRUE
OG0003025	-47.7729	101.546	-43.5426	99.0852	2.46059	TRUE	1.09462	EXPANDED	-0.0571924	1.15181	TRUE
OG0003027	-41.7825	89.5651	-31.0503	74.1006	15.4645	TRUE	0.532672	EXPANDED	0.0819495	0.450723	TRUE
OG0003029	-33.4219	72.8437	-27.3504	66.7007	6.14301	TRUE	0.707081	EXPANDED	0.0800482	0.627033	TRUE
OG0003045	-49.8012	105.602	-40.913	93.8259	11.7765	TRUE	0.797797	EXPANDED	-0.0232794	0.821076	TRUE
OG0003049	-31.0895	68.179	-24.1828	60.3656	7.81345	TRUE	1.55314	EXPANDED	0.00272	1.55042	TRUE
OG0003086	-40.5695	87.1391	-28.728	69.4559	17.6832	TRUE	1.63559	EXPANDED	0.0483576	1.58723	TRUE
OG0003093	-41.1757	88.3513	-34.0946	80.1892	8.16211	TRUE	1.40187	EXPANDED	-0.0467309	1.4486	TRUE
OG0003097	-44.9325	95.8649	-39.5033	91.0066	4.85834	TRUE	1.39909	EXPANDED	0.0797469	1.31934	TRUE
OG0003100	-51.1845	108.369	-44.3557	100.711	7.65759	TRUE	0.466575	EXPANDED	-0.0273315	0.493907	TRUE
OG0003102	-42.1004	90.2007	-37.6761	87.3521	2.84863	TRUE	0.397965	EXPANDED	0.0609708	0.336994	TRUE
OG0003103	-50.5762	107.152	-41.1881	94.3761	12.7764	TRUE	3.15415	EXPANDED	0.0549798	3.09917	TRUE
OG0003111	-34.0305	74.0609	-27.8093	67.6186	6.44233	TRUE	1.60563	EXPANDED	0.0446897	1.56094	TRUE
OG0003114	-49.8815	105.763	-39.5858	91.1716	14.5915	TRUE	0.702071	EXPANDED	0.0260645	0.676006	TRUE
OG0003120	-48.0759	102.152	-36.7058	85.4115	16.7403	TRUE	0.288962	EXPANDED	0.0907511	0.198211	TRUE
OG0003128	-28.7108	63.4215	-21.4522	54.9044	8.51716	TRUE	0.299069	EXPANDED	0.0768108	0.222258	TRUE
OG0003131	-29.726	65.452	-24.8636	61.7271	3.7249	TRUE	0.8732	EXPANDED	0.0681802	0.80502	TRUE
OG0003133	-44.8662	95.7324	-33.4492	78.8983	16.8341	TRUE	0.601924	EXPANDED	0.0641466	0.537777	TRUE
OG0003137	-42.8759	91.7519	-38.3215	88.643	3.10885	TRUE	1.15318	EXPANDED	0.0810129	1.07217	TRUE
OG0003141	-46.6825	99.365	-35.2126	82.4253	16.9398	TRUE	0.464466	EXPANDED	-0.0224013	0.486867	TRUE
OG0003148	-38.9497	83.8993	-32.5692	77.1383	6.76104	TRUE	0.0850982	EXPANDED	-0.0232722	0.10837	TRUE
OG0003151	-46.5316	99.0633	-37.8921	87.7842	11.279	TRUE	0.44856	EXPANDED	-0.0458997	0.49446	TRUE
OG0003152	-26.6508	59.3017	-20.9455	53.891	5.41067	TRUE	1.03971	EXPANDED	-0.0001075	1.03982	TRUE
OG0003155	-37.5126	81.0253	-29.2066	70.4133	10.612	TRUE	1.07543	EXPANDED	0.0627734	1.01266	TRUE
OG0003158	-46.0549	98.1097	-24.6766	61.3532	36.7565	TRUE	2.2494	EXPANDED	0.0318563	2.21754	TRUE
OG0003166	-47.6207	101.241	-41.5919	95.1839	6.05748	TRUE	0.836516	EXPANDED	-0.0241648	0.860681	TRUE
OG0003173	-35.931	77.862	-27.6796	67.3591	10.5029	TRUE	0.693044	EXPANDED	-0.0199585	0.713002	TRUE
OG0003176	-48.8216	103.643	-44.3904	100.781	2.86234	TRUE	0.283832	EXPANDED	-0.0373737	0.321206	TRUE
OG0003187	-30.0682	66.1364	-24.113	60.226	5.91033	TRUE	0.689656	EXPANDED	0	0.689656	TRUE
OG0003196	-48.8937	103.787	-38.2691	88.5382	15.2491	TRUE	1.85248	EXPANDED	-0.0157322	1.86821	TRUE
OG0003200	-37.1917	80.3833	-28.5935	69.1869	11.1964	TRUE	1.61117	EXPANDED	-0.0207678	1.63194	TRUE
OG0003212	-46.5997	99.1993	-41.8863	95.7727	3.42666	TRUE	0.680188	EXPANDED	-0.116691	0.796879	TRUE
OG0003214	-50.1977	106.395	-45.3046	102.609	3.78625	TRUE	0.752722	EXPANDED	0.102529	0.650193	TRUE
OG0003222	-36.7781	79.5563	-26.7349	65.4697	14.0865	TRUE	0.255024	EXPANDED	0.0786691	0.176355	TRUE
OG0003223	-41.9321	89.8642	-27.9263	67.8526	22.0116	TRUE	1.64723	EXPANDED	0.0094281	1.6378	TRUE
OG0003230	-40.9424	87.8847	-34.9376	81.8752	6.00948	TRUE	0.208267	EXPANDED	0.0496473	0.15862	TRUE
OG0003247	-31.901	69.802	-26.13	64.26	5.54199	TRUE	1.1905	EXPANDED	0.0597184	1.13078	TRUE
OG0003267	-32.003	70.006	-25.7296	63.4592	6.54685	TRUE	0.97343	EXPANDED	-0.0212753	0.994705	TRUE
OG0003270	-32.6619	71.3238	-27.3213	66.6427	4.68117	TRUE	1.47427	EXPANDED	0.059323	1.41495	TRUE
OG0003280	-48.9258	103.852	-40.4665	92.9331	10.9185	TRUE	0.502921	EXPANDED	0.0728037	0.430117	TRUE
OG0003300	-31.9864	69.9727	-26.3595	64.719	5.2537	TRUE	0.266037	EXPANDED	-0.0134983	0.279535	TRUE
OG0003301	-27.5827	61.1654	-20.2914	52.5828	8.5826	TRUE	1.45053	EXPANDED	-0.0078849	1.45841	TRUE
OG0003304	-48.5218	103.044	-43.331	98.6619	4.38173	TRUE	0.146871	EXPANDED	0.0929154	0.0539556	TRUE
OG0003319	-36.9332	79.8665	-31.2223	74.4446	5.42185	TRUE	0.117893	EXPANDED	-0.022922	0.140815	TRUE
OG0003322	-44.7988	95.5975	-31.5739	75.1479	20.4497	TRUE	1.59932	EXPANDED	0.0729771	1.52634	TRUE
OG0003323	-30.8954	67.7907	-24.7727	61.5454	6.24531	TRUE	1.64048	EXPANDED	0.0628909	1.57759	TRUE
OG0003328	-26.8827	59.7654	-20.6938	53.3875	6.37794	TRUE	1.3411	EXPANDED	0	1.3411	TRUE
OG0003337	-36.9827	79.9655	-31.9499	75.8998	4.06567	TRUE	1.24366	EXPANDED	0.0455853	1.19807	TRUE
OG0003384	-45.0901	96.1802	-39.7621	91.5242	4.65598	TRUE	1.91746	EXPANDED	-0.031028	1.94849	TRUE
OG0003392	-43.0952	92.1904	-34.7171	81.4343	10.7561	TRUE	0.110149	EXPANDED	0.0633794	0.0467696	TRUE
OG0003409	-27.4965	60.9929	-22.906	57.8119	3.18101	TRUE	0.716669	EXPANDED	0	0.716669	TRUE
OG0003414	-36.9512	79.9024	-30.0812	72.1625	7.73991	TRUE	2.25365	EXPANDED	-0.0208824	2.27453	TRUE
OG0003417	-49.1621	104.324	-44.5153	101.031	3.29375	TRUE	1.5769	EXPANDED	-0.0703249	1.64722	TRUE
OG0003418	-37.1871	80.3743	-32.5492	77.0984	3.27586	TRUE	1.19505	EXPANDED	0.0807145	1.11434	TRUE
OG0003435	-34.8819	75.7638	-30.2207	72.4414	3.32244	TRUE	0.216468	EXPANDED	-0.0442557	0.260724	TRUE
OG0003439	-33.6112	73.2224	-27.2378	66.4756	6.74676	TRUE	0.942068	EXPANDED	0.0177566	0.924311	TRUE
OG0003442	-35.8207	77.6413	-31.8025	75.6049	2.03638	TRUE	1.16652	EXPANDED	0.0490788	1.11744	TRUE
OG0003454	-30.6346	67.2693	-18.5479	49.0958	18.1735	TRUE	1.72199	EXPANDED	0.0478264	1.67416	TRUE
OG0003466	-38.4697	82.9393	-27.0596	66.1192	16.8201	TRUE	0.898888	EXPANDED	-0.021571	0.920459	TRUE
OG0003470	-32.9817	71.9635	-26.1869	64.3739	7.58962	TRUE	1.43082	EXPANDED	-0.0206078	1.45143	TRUE
OG0003494	-24.6749	55.3498	-19.7923	51.5846	3.76515	TRUE	0.049613	EXPANDED	0	0.049613	TRUE
OG0003498	-22.7428	51.4857	-16.4494	44.8988	6.58684	TRUE	1.2275	EXPANDED	0.0545298	1.17297	TRUE
OG0003499	-32.1835	70.367	-25.3488	62.6976	7.66931	TRUE	0.810162	EXPANDED	0.0691577	0.741004	TRUE
OG0003530	-39.6256	85.2513	-27.0443	66.0887	19.1626	TRUE	2.03836	EXPANDED	0.0485742	1.98979	TRUE
OG0003535	-44.1136	94.2273	-38.5632	89.1265	5.1008	TRUE	0.764582	EXPANDED	-0.0728178	0.8374	TRUE
OG0003554	-26.9294	59.8587	-16.3994	44.7988	15.0599	TRUE	2.04967	EXPANDED	0.0197532	2.02992	TRUE
OG0003561	-34.0044	74.0089	-28.7258	69.4516	4.5573	TRUE	0.933586	EXPANDED	-0.0464806	0.980067	TRUE
OG0003579	-42.9029	91.8059	-30.1355	72.2711	19.5348	TRUE	2.20463	EXPANDED	-0.0421299	2.24676	TRUE
OG0003585	-43.8973	93.7945	-32.9061	77.8121	15.9824	TRUE	1.85094	EXPANDED	0.015258	1.83568	TRUE
OG0003591	-23.4897	52.9794	-18.2218	48.4436	4.53577	TRUE	1.50725	EXPANDED	0	1.50725	TRUE
OG0003593	-46.1316	98.2633	-39.3734	90.7468	7.51643	TRUE	0.128548	EXPANDED	-0.0461641	0.174712	TRUE
OG0003600	-22.2593	50.5186	-18.0849	48.1697	2.34885	TRUE	1.33745	EXPANDED	-5.77e-05	1.33751	TRUE
OG0003610	-31.3966	68.7933	-19.7623	51.5246	17.2687	TRUE	1.10862	EXPANDED	-5.8e-05	1.10868	TRUE
OG0003611	-26.4269	58.8538	-21.0005	54.001	4.85281	TRUE	0.620033	EXPANDED	0	0.620033	TRUE
OG0003614	-40.1754	86.3508	-35.533	83.066	3.2848	TRUE	0.250659	EXPANDED	0.0315262	0.219133	TRUE
OG0003629	-27.8264	61.6527	-22.6562	57.3123	4.34041	TRUE	0.395393	EXPANDED	-0.021675	0.417068	TRUE
OG0003635	-41.1358	88.2717	-35.1132	82.2264	6.04524	TRUE	0.583498	EXPANDED	-0.0520994	0.635597	TRUE
OG0003639	-37.7181	81.4363	-31.5314	75.0629	6.37335	TRUE	0.594204	EXPANDED	0.0010191	0.593185	TRUE
OG0003677	-43.3596	92.7191	-36.9335	85.867	6.85219	TRUE	0.686239	EXPANDED	-0.100839	0.787078	TRUE
OG0003688	-43.5411	93.0821	-20.5062	53.0124	40.0697	TRUE	0.256501	EXPANDED	0.0017662	0.254735	TRUE
OG0003715	-33.6431	73.2862	-27.4058	66.8117	6.47451	TRUE	1.34722	EXPANDED	0.0323224	1.3149	TRUE
OG0003724	-22.2584	50.5169	-18.0074	48.0147	2.50218	TRUE	0.635547	EXPANDED	4.27e-05	0.635504	TRUE
OG0003728	-47.0224	100.045	-39.5876	91.1752	8.86959	TRUE	0.62022	EXPANDED	-0.0225937	0.642814	TRUE
OG0003807	-42.877	91.7539	-38.0812	88.1624	3.59154	TRUE	1.44417	EXPANDED	0.009075	1.4351	TRUE
OG0003816	-39.2108	84.4216	-31.7884	75.5768	8.84485	TRUE	0.152501	EXPANDED	0.0737384	0.0787626	TRUE
OG0003821	-40.0591	86.1182	-32.8114	77.6228	8.49539	TRUE	0.699504	EXPANDED	0.0393732	0.660131	TRUE
OG0003835	-31.1376	68.2751	-26.6205	65.241	3.03411	TRUE	1.24688	EXPANDED	-0.0233891	1.27027	TRUE
OG0003839	-33.4505	72.9009	-29.0778	70.1555	2.74542	TRUE	0.0822845	EXPANDED	-0.0212878	0.103572	TRUE
OG0003840	-34.0093	74.0187	-27.7898	67.5797	6.439	TRUE	1.10817	EXPANDED	0.029	1.07917	TRUE
OG0003868	-48.4608	102.922	-42.2547	96.5095	6.41206	TRUE	1.83235	EXPANDED	-0.0452806	1.87763	TRUE
OG0003870	-31.1659	68.3318	-24.3053	60.6106	7.72117	TRUE	1.1647	EXPANDED	0.0241266	1.14057	TRUE
OG0003892	-54.889	115.778	-38.135	88.27	27.508	TRUE	4.79932	EXPANDED	0.148232	4.65109	TRUE
OG0003897	-43.1808	92.3616	-33.4115	78.823	13.5387	TRUE	1.30259	EXPANDED	0.0258542	1.27674	TRUE
OG0003900	-46.5795	99.1591	-40.1009	92.2018	6.95725	TRUE	0.663878	EXPANDED	-0.0271025	0.69098	TRUE
OG0003914	-17.1737	40.3474	-12.9013	37.8026	2.54479	TRUE	1.40171	EXPANDED	0.0223109	1.3794	TRUE
OG0003915	-24.7298	55.4596	-17.2015	46.4029	9.05662	TRUE	1.3852	EXPANDED	-0.0185898	1.40379	TRUE
OG0003936	-40.767	87.5339	-31.8633	75.7266	11.8073	TRUE	1.90255	EXPANDED	-0.0863447	1.98889	TRUE
OG0003938	-33.4495	72.899	-27.9089	67.8177	5.08132	TRUE	0.0519835	EXPANDED	0.0445286	0.0074549	TRUE
OG0003974	-31.0925	68.1851	-24.7493	61.4987	6.68641	TRUE	1.11603	EXPANDED	-0.039823	1.15585	TRUE
OG0003977	-25.6536	57.3072	-18.7303	49.4606	7.8466	TRUE	0.480885	EXPANDED	0.012351	0.468534	TRUE
OG0003990	-32.3593	70.7185	-26.2515	64.5029	6.21561	TRUE	0.172728	EXPANDED	-0.0408099	0.213538	TRUE
OG0003999	-40.0753	86.1505	-28.0245	68.0491	18.1014	TRUE	8e-07	EXPANDED	0.0451986	-0.0451978	FALSE
OG0004021	-18.0086	42.0172	-13.669	39.338	2.67915	TRUE	0.394032	EXPANDED	-5.4e-06	0.394037	TRUE
OG0004028	-19.1003	44.2007	-14.9217	41.8433	2.35736	TRUE	1.10706	EXPANDED	0.000416	1.10664	TRUE
OG0004053	-37.8417	81.6835	-12.5484	37.0968	44.5867	TRUE	0.892994	EXPANDED	0.011841	0.881153	TRUE
OG0004060	-38.1093	82.2185	-30.8103	73.6206	8.59791	TRUE	0.237631	EXPANDED	-0.0208752	0.258506	TRUE
OG0004062	-45.6068	97.2135	-40.4949	92.9898	4.22374	TRUE	0.723309	EXPANDED	-0.0226176	0.745927	TRUE
OG0004071	-27.0498	60.0996	-22.95	57.9	2.19968	TRUE	0.657468	EXPANDED	-0.0202634	0.677731	TRUE
OG0004101	-24.6093	55.2187	-20.3908	52.7816	2.43712	TRUE	0.509054	EXPANDED	0.0247269	0.484327	TRUE
OG0004106	-40.2525	86.505	-29.7774	71.5548	14.9503	TRUE	0.243461	EXPANDED	-0.0360427	0.279504	TRUE
OG0004116	-26.3179	58.6357	-21.4819	54.9638	3.67189	TRUE	0.278324	EXPANDED	0.031829	0.246495	TRUE
OG0004119	-29.9139	65.8278	-24.1505	60.3011	5.52673	TRUE	0.00219	EXPANDED	0.0193813	-0.0171913	FALSE
OG0004162	-44.0975	94.1951	-39.2966	90.5933	3.60181	TRUE	0.0015032	EXPANDED	-0.0454062	0.0469094	TRUE
OG0004167	-34.0482	74.0964	-19.7155	51.4311	22.6654	TRUE	1.63412	EXPANDED	-0.0183317	1.65245	TRUE
OG0004168	-27.6284	61.2568	-19.6446	51.2891	9.96767	TRUE	0.964235	EXPANDED	0.011198	0.953037	TRUE
OG0004170	-39.0462	84.0923	-20.8018	53.6037	30.4887	TRUE	1.69928	EXPANDED	-0.0188366	1.71812	TRUE
OG0004185	-36.3014	78.6027	-20.7322	53.4643	25.1384	TRUE	0.810562	EXPANDED	-0.0201997	0.830762	TRUE
OG0004187	-35.8509	77.7018	-31.0236	74.0471	3.65467	TRUE	0.0409088	EXPANDED	-0.0608828	0.101792	TRUE
OG0004196	-37.4305	80.8609	-27.9506	67.9012	12.9598	TRUE	0.706056	EXPANDED	0.0014579	0.704598	TRUE
OG0004198	-33.3184	72.6368	-26.8166	65.6333	7.00349	TRUE	0.877281	EXPANDED	-0.0438239	0.921105	TRUE
OG0004213	-29.7365	65.473	-23.9575	59.9151	5.55789	TRUE	2.6406	EXPANDED	0.0210447	2.61956	TRUE
OG0004232	-16.2208	38.4416	-11.386	34.7721	3.66955	TRUE	0.649501	EXPANDED	0.01796	0.631541	TRUE
OG0004243	-28.3328	62.6657	-24.2239	60.4477	2.21796	TRUE	0.289691	EXPANDED	-0.041205	0.330896	TRUE
OG0004244	-20.1103	46.2206	-12.7768	37.5535	8.66704	TRUE	0.0276177	EXPANDED	0.000187	0.0274307	TRUE
OG0004269	-28.4323	62.8646	-21.966	55.9321	6.93251	TRUE	0.421979	EXPANDED	-0.016647	0.438626	TRUE
OG0004273	-40.6684	87.3367	-34.7878	81.5757	5.76104	TRUE	0.456771	EXPANDED	0.0335611	0.42321	TRUE
OG0004278	-35.8744	77.7489	-29.6909	71.3818	6.36706	TRUE	0.556446	EXPANDED	-0.0651069	0.621553	TRUE
OG0004300	-38.0184	82.0368	-19.5894	51.1788	30.858	TRUE	0.0179721	EXPANDED	0	0.0179721	TRUE
OG0004305	-35.6685	77.337	-22.6318	57.2636	20.0734	TRUE	1.76468	EXPANDED	-0.0373429	1.80202	TRUE
OG0004345	-23.842	53.6839	-15.3923	42.7846	10.8993	TRUE	1.72292	EXPANDED	-0.0180333	1.74095	TRUE
OG0004348	-23.5353	53.0707	-15.2151	42.4303	10.6404	TRUE	1.53061	EXPANDED	-0.0201627	1.55077	TRUE
OG0004358	-20.9835	47.967	-16.5033	45.0066	2.9604	TRUE	1.0618	EXPANDED	0.0165506	1.04525	TRUE
OG0004391	-27.2973	60.5946	-21.3182	54.6364	5.95817	TRUE	0.188616	EXPANDED	0.0165073	0.172109	TRUE
OG0004407	-41.2392	88.4785	-34.545	81.0899	7.38859	TRUE	2e-07	EXPANDED	0.0077119	-0.0077117	FALSE
OG0004416	-21.1202	48.2404	-16.6381	45.2761	2.96424	TRUE	0.843945	EXPANDED	-0.0214502	0.865395	TRUE
OG0004420	-39.5812	85.1625	-30.9186	73.8371	11.3254	TRUE	0.547632	EXPANDED	-0.0379169	0.585549	TRUE
OG0004436	-42.802	91.604	-35.6996	83.3992	8.20473	TRUE	0.0549424	EXPANDED	-0.0281279	0.0830703	TRUE
OG0004453	-22.7678	51.5357	-17.9791	47.9582	3.57749	TRUE	0.776567	EXPANDED	-0.0189214	0.795488	TRUE
OG0004462	-24.0635	54.127	-19.6072	51.2145	2.91252	TRUE	1.55234	EXPANDED	-0.0184193	1.57076	TRUE
OG0004465	-41.5753	89.1506	-35.3625	82.7249	6.42563	TRUE	1.21752	EXPANDED	-0.0884153	1.30594	TRUE
OG0004471	-36.6831	79.3662	-14.8866	41.7733	37.5929	TRUE	0.963389	EXPANDED	-1.29e-05	0.963402	TRUE
OG0004474	-39.9637	85.9274	-27.3192	66.6384	19.2891	TRUE	0.159626	EXPANDED	0.0470416	0.112584	TRUE
OG0004479	-29.7774	65.5548	-22.3243	56.6486	8.90617	TRUE	0.289763	EXPANDED	0.0333928	0.25637	TRUE
OG0004481	-36.7942	79.5884	-21.5493	55.0986	24.4897	TRUE	0.175369	EXPANDED	0.0250424	0.150327	TRUE
OG0004487	-16.7221	39.4442	-11.0889	34.1778	5.26632	TRUE	0.753069	EXPANDED	0.016467	0.736602	TRUE
OG0004489	-23.9413	53.8826	-19.2232	50.4464	3.43612	TRUE	0.068539	EXPANDED	-0.0147522	0.0832912	TRUE
OG0004491	-25.4331	56.8662	-21.0658	54.1317	2.73456	TRUE	0.0603929	EXPANDED	-0.0191954	0.0795883	TRUE
OG0004494	-21.2105	48.4211	-16.7296	45.4593	2.9618	TRUE	0.769715	EXPANDED	-0.0187746	0.78849	TRUE
OG0004498	-27.1976	60.3953	-21.8573	55.7146	4.68066	TRUE	0.0401006	EXPANDED	-0.0196789	0.0597795	TRUE
OG0004505	-14.5112	35.0224	-9.2569	30.5138	4.5086	TRUE	0.672263	EXPANDED	0.0245083	0.647755	TRUE
OG0004526	-41.9958	89.9916	-37.0752	86.1505	3.84116	TRUE	4.6e-06	EXPANDED	-0.0867458	0.0867504	TRUE
OG0004533	-37.2293	80.4586	-30.2617	72.5233	7.93525	TRUE	0.752515	EXPANDED	-0.0386408	0.791156	TRUE
OG0004538	-44.1136	94.2273	-37.9267	87.8534	6.37387	TRUE	0.271453	EXPANDED	-0.058641	0.330094	TRUE
OG0004581	-25.3545	56.7091	-17.7838	47.5677	9.14141	TRUE	0.276016	EXPANDED	-0.0183617	0.294378	TRUE
OG0004594	-29.2543	64.5086	-24.5416	61.0831	3.42553	TRUE	0.736046	EXPANDED	-0.0622215	0.798268	TRUE
OG0004598	-37.0481	80.0963	-21.2673	54.5346	25.5617	TRUE	1.79735	EXPANDED	-0.0385327	1.83588	TRUE
OG0004608	-20.1756	46.3512	-15.1107	42.2215	4.12979	TRUE	0.664069	EXPANDED	-0.0179261	0.681995	TRUE
OG0004618	-21.0317	48.0634	-15.1915	42.3829	5.68049	TRUE	1.51596	EXPANDED	-0.0167338	1.53269	TRUE
OG0004627	-25.8065	57.613	-21.2569	54.5139	3.09914	TRUE	0.578326	EXPANDED	-0.0389031	0.617229	TRUE
OG0004643	-34.2022	74.4045	-21.735	55.47	18.9345	TRUE	0.627495	EXPANDED	-0.001519	0.629014	TRUE
OG0004674	-31.6157	69.2314	-27.3978	66.7955	2.43583	TRUE	0.10757	EXPANDED	-0.0374923	0.145062	TRUE
OG0004687	-36.4273	78.8546	-23.5679	59.1359	19.7187	TRUE	1.19246	EXPANDED	-0.0139677	1.20643	TRUE
OG0004692	-19.2159	44.4319	-14.4577	40.9154	3.51645	TRUE	0.184626	EXPANDED	-0.0178718	0.202498	TRUE
OG0004706	-24.6994	55.3988	-20.3859	52.7718	2.627	TRUE	1.50324	EXPANDED	0.0001687	1.50307	TRUE
OG0004710	-45.8956	97.7911	-39.8117	91.6234	6.16774	TRUE	0.249366	EXPANDED	-0.0511051	0.300471	TRUE
OG0004714	-22.3306	50.6612	-16.8653	45.7305	4.9307	TRUE	0.946967	EXPANDED	-0.000118	0.947085	TRUE
OG0004715	-15.6053	37.2106	-6.83731	25.6746	11.5359	TRUE	0.331358	EXPANDED	0	0.331358	TRUE
OG0004723	-35.6639	77.3278	-20.8164	53.6328	23.695	TRUE	0.474432	EXPANDED	0.0337297	0.440702	TRUE
OG0004724	-37.5233	81.0466	-22.9513	57.9026	23.144	TRUE	0.805135	EXPANDED	-0.0174431	0.822578	TRUE
OG0004745	-25.3342	56.6684	-21.0254	54.0509	2.6175	TRUE	2.0916	EXPANDED	-0.0383485	2.12995	TRUE
OG0004755	-39.3396	84.6793	-34.3836	80.7671	3.91214	TRUE	0.724638	EXPANDED	-0.0246903	0.749328	TRUE
OG0004777	-24.5902	55.1805	-20.0581	52.1162	3.06428	TRUE	0.814752	EXPANDED	-0.0393921	0.854144	TRUE
OG0004778	-24.5899	55.1798	-19.6961	51.3922	3.78761	TRUE	0.611486	EXPANDED	0.0079986	0.603487	TRUE
OG0004781	-20.2081	46.4162	-14.5931	41.1862	5.22992	TRUE	0.276581	EXPANDED	-0.0048869	0.281468	TRUE
OG0004803	-25.4693	56.9387	-20.7801	53.5603	3.37841	TRUE	1.25852	EXPANDED	-0.0382166	1.29674	TRUE
OG0004830	-36.0743	78.1487	-21.4479	54.8958	23.2528	TRUE	0.791329	EXPANDED	-0.0196988	0.811028	TRUE
OG0004837	-27.928	61.8561	-20.4925	52.985	8.87113	TRUE	0.253426	EXPANDED	-0.0374887	0.290915	TRUE
OG0004859	-24.6892	55.3785	-20.1657	52.3315	3.04701	TRUE	0.840886	EXPANDED	-0.038219	0.879105	TRUE
OG0004869	-22.596	51.192	-18.2324	48.4648	2.72719	TRUE	0.406064	EXPANDED	0.0017355	0.404328	TRUE
OG0004882	-27.4206	60.8413	-20.0674	52.1347	8.70654	TRUE	0.34545	EXPANDED	0.0129407	0.332509	TRUE
OG0004886	-29.2588	64.5175	-25.059	62.118	2.39952	TRUE	1.69029	EXPANDED	0.0167571	1.67353	TRUE
OG0004904	-46.7975	99.595	-39.263	90.5259	9.06909	TRUE	1.69736	EXPANDED	0.171234	1.52613	TRUE
OG0004963	-28.3838	62.7676	-23.5789	59.1578	3.60981	TRUE	0.495665	EXPANDED	0.0341592	0.461506	TRUE
OG0005012	-18.3987	42.7974	-12.1035	36.2069	6.59045	TRUE	1.18948	EXPANDED	-0.0128959	1.20238	TRUE
OG0005024	-26.5033	59.0067	-22.3733	56.7466	2.26012	TRUE	0.998	EXPANDED	-0.0603032	1.0583	TRUE
OG0005045	-17.9123	41.8246	-10.5695	33.139	8.68566	TRUE	1.267	EXPANDED	-0.0172214	1.28422	TRUE
OG0005084	-31.7797	69.5593	-27.1249	66.2498	3.30953	TRUE	0.784212	EXPANDED	-0.0560124	0.840224	TRUE
OG0005091	-21.7088	49.4175	-17.0299	46.0598	3.35766	TRUE	1.52297	EXPANDED	-0.0359391	1.55891	TRUE
OG0005097	-25.1679	56.3358	-16.9777	45.9554	10.3803	TRUE	0.0933961	EXPANDED	-0.0180102	0.111406	TRUE
OG0005136	-17.8219	41.6439	-10.5707	33.1414	8.50248	TRUE	1.03454	EXPANDED	-0.0196642	1.0542	TRUE
OG0005189	-22.5822	51.1643	-18.0808	48.1615	3.00279	TRUE	1.66971	EXPANDED	-0.0167888	1.6865	TRUE
OG0005195	-27.1695	60.339	-22.7531	57.5062	2.83274	TRUE	0.844015	EXPANDED	-0.0229324	0.866947	TRUE
OG0005209	-24.2211	54.4421	-16.1951	44.3903	10.0518	TRUE	0.001692	EXPANDED	-0.0183517	0.0200437	TRUE
OG0005232	-25.9132	57.8264	-21.5667	55.1335	2.69291	TRUE	0.193219	EXPANDED	-0.016938	0.210157	TRUE
OG0005237	-22.5855	51.171	-17.1147	46.2293	4.94169	TRUE	0.720302	EXPANDED	-0.0358278	0.75613	TRUE
OG0005248	-11.3536	28.7072	-5.21555	22.4311	6.27613	TRUE	0.278335	EXPANDED	0	0.278335	TRUE
OG0005251	-31.4984	68.9968	-20.733	53.4659	15.5308	TRUE	0.922219	EXPANDED	-0.0367666	0.958986	TRUE
OG0005270	-23.5098	53.0195	-18.8591	49.7182	3.30138	TRUE	1.48924	EXPANDED	-0.0361665	1.52541	TRUE
OG0005299	-47.7135	101.427	-42.0283	96.0566	5.37035	TRUE	2.69664	EXPANDED	0.181039	2.5156	TRUE
OG0005310	-31.067	68.1339	-23.5767	59.1534	8.98052	TRUE	0.0571802	EXPANDED	-0.0358198	0.093	TRUE
OG0005354	-31.0841	68.1681	-23.4017	58.8035	9.36464	TRUE	0.609619	EXPANDED	-0.0307564	0.640375	TRUE
OG0005377	-24.8461	55.6922	-19.5777	51.1554	4.53672	TRUE	0.288484	EXPANDED	-0.0581383	0.346622	TRUE
OG0005448	-30.2638	66.5276	-22.668	57.3359	9.19166	TRUE	0.950723	EXPANDED	-0.0799231	1.03065	TRUE
OG0005516	-30.9377	67.8754	-26.6096	65.2192	2.65626	TRUE	0.194701	EXPANDED	-0.0823053	0.277006	TRUE
OG0005529	-41.5334	89.0668	-35.2055	82.411	6.65581	TRUE	0.459381	EXPANDED	-0.0761965	0.535578	TRUE
OG0005651	-34.8496	75.6992	-30.3317	72.6634	3.03578	TRUE	4.98215	EXPANDED	-20.8632	25.8453	TRUE
OG0005669	-46.5222	99.0443	-41.1138	94.2277	4.81667	TRUE	0.351074	EXPANDED	0.0610811	0.289993	TRUE
OG0005682	-37.6012	81.2025	-28.5386	69.0772	12.1253	TRUE	0.0774979	EXPANDED	-0.0293183	0.106816	TRUE
OG0005795	-22.6053	51.2105	-15.9575	43.9149	7.2956	TRUE	0.589284	EXPANDED	-0.0548057	0.64409	TRUE
OG0005859	-22.867	51.734	-16.411	44.8219	6.91208	TRUE	0.235377	EXPANDED	-0.0554525	0.29083	TRUE
OG0005892	-32.9327	71.8653	-28.1123	68.2245	3.64078	TRUE	0.295656	EXPANDED	-0.0981291	0.393785	TRUE
OG0005918	-42.348	90.6961	-37.7212	87.4424	3.25369	TRUE	0.375371	EXPANDED	-0.120719	0.49609	TRUE
OG0005999	-27.0754	60.1508	-20.2404	52.4807	7.67006	TRUE	0.0979786	EXPANDED	-0.0534478	0.151426	TRUE
OG0006003	-23.3997	52.7993	-16.8818	45.7636	7.03575	TRUE	0.105453	EXPANDED	-0.0547042	0.160157	TRUE
OG0006028	-31.5663	69.1325	-27.1993	66.3986	2.73395	TRUE	0.244783	EXPANDED	-0.0758386	0.320622	TRUE
OG0006050	-33.3786	72.7572	-26.2981	64.5961	8.16113	TRUE	0.0380479	EXPANDED	-0.0765092	0.114557	TRUE
OG0006082	-38.3399	82.6797	-33.0855	78.171	4.50868	TRUE	0.0507386	EXPANDED	-0.105533	0.156272	TRUE
OG0006092	-23.1602	52.3204	-16.5789	45.1578	7.16259	TRUE	0.282654	EXPANDED	-0.0677499	0.350404	TRUE
OG0006109	-34.2021	74.4042	-27.2933	66.5866	7.81765	TRUE	0.124746	EXPANDED	-0.076225	0.200971	TRUE
OG0006341	-24.1711	54.3423	-18.688	49.3759	4.96634	TRUE	0.294239	EXPANDED	-0.0346939	0.328933	TRUE
OG0006482	-40.806	87.6121	-26.3213	64.6426	22.9695	TRUE	0.286155	EXPANDED	-0.0162471	0.302402	TRUE
OG0006485	-18.2861	42.5722	-14.2336	40.4672	2.10493	TRUE	0.047618	EXPANDED	-0.0176871	0.0653051	TRUE
OG0006499	-41.6616	89.3232	-36.7816	85.5632	3.75997	TRUE	1.53911	EXPANDED	0.0084253	1.53068	TRUE
OG0006500	-28.8105	63.621	-21.0662	54.1324	9.48865	TRUE	1.05643	EXPANDED	-0.0869726	1.1434	TRUE
OG0006507	-22.0677	50.1354	-16.8864	45.7729	4.36251	TRUE	0.307918	EXPANDED	-0.0533113	0.361229	TRUE
OG0006516	-25.0516	56.1031	-18.4621	48.9241	7.17896	TRUE	0.4888	EXPANDED	-0.0339807	0.522781	TRUE
OG0006616	-26.7442	59.4885	-22.4372	56.8745	2.61402	TRUE	0.516609	EXPANDED	-0.0750829	0.591692	TRUE
OG0006873	-37.822	81.6439	-32.6419	77.2838	4.36015	TRUE	1.86895	EXPANDED	-0.0643908	1.93334	TRUE
OG0006915	-41.2886	88.5773	-36.6284	85.2569	3.32041	TRUE	0.0522102	EXPANDED	-0.566519	0.618729	TRUE
OG0007014	-38.2377	82.4754	-33.8383	79.6765	2.7989	TRUE	0.0169206	EXPANDED	-0.127196	0.144117	TRUE
OG0007015	-33.6028	73.2056	-27.8571	67.7142	5.49141	TRUE	3.28974	EXPANDED	-0.135425	3.42517	TRUE
OG0007040	-31.968	69.936	-26.2031	64.4062	5.52979	TRUE	1.6219	EXPANDED	-0.05983	1.68173	TRUE
OG0007094	-44.8732	95.7464	-38.3986	88.7973	6.94916	TRUE	2.15714	EXPANDED	0.142739	2.0144	TRUE
OG0007131	-30.8818	67.7635	-25.831	63.662	4.10156	TRUE	1.88602	EXPANDED	-0.195776	2.0818	TRUE
OG0007151	-38.3949	82.7899	-33.5938	79.1877	3.60224	TRUE	0.513575	EXPANDED	-0.105817	0.619392	TRUE
OG0007164	-45.0494	96.0987	-40.2204	92.4409	3.65783	TRUE	2e-07	EXPANDED	-0.15831	0.15831	TRUE
OG0007176	-45.6042	97.2084	-39.2401	90.4802	6.7282	TRUE	0.707178	EXPANDED	-0.053114	0.760292	TRUE
OG0007181	-44.2447	94.4894	-38.4347	88.8694	5.62002	TRUE	2.7832	EXPANDED	-0.0876526	2.87085	TRUE
OG0007186	-24.1769	54.3537	-19.8884	51.7769	2.57684	TRUE	0.160687	EXPANDED	-0.138993	0.29968	TRUE
OG0007221	-42.838	91.676	-38.1452	88.2904	3.38557	TRUE	2.65714	EXPANDED	-0.181717	2.83886	TRUE
OG0007230	-41.0778	88.1556	-34.4225	80.845	7.31059	TRUE	2.41541	EXPANDED	-0.0520549	2.46746	TRUE
OG0007328	-47.1157	100.231	-35.3668	82.7336	17.4978	TRUE	3.27107	EXPANDED	-0.402061	3.67313	TRUE
OG0007481	-41.0173	88.0346	-32.7694	77.5388	10.4958	TRUE	1.00774	EXPANDED	-0.136141	1.14388	TRUE
OG0007502	-36.6269	79.2539	-28.7693	69.5386	9.71531	TRUE	1.16912	EXPANDED	-0.126218	1.29534	TRUE
OG0007569	-41.7587	89.5175	-37.3304	86.6609	2.8566	TRUE	0.0484698	EXPANDED	-0.196128	0.244598	TRUE
OG0007601	-36.1298	78.2596	-29.5486	71.0972	7.1624	TRUE	1.02107	EXPANDED	-0.0600924	1.08116	TRUE
OG0007648	-38.5692	83.1384	-34.2679	80.5358	2.60253	TRUE	0.100701	EXPANDED	-0.139004	0.239705	TRUE
OG0007704	-39.1982	84.3965	-32.5319	77.0638	7.33265	TRUE	3.12312	EXPANDED	-0.115534	3.23865	TRUE
OG0007822	-37.8033	81.6067	-33.1013	78.2026	3.40409	TRUE	1.86201	EXPANDED	-0.122162	1.98417	TRUE
OG0007836	-29.4624	64.9247	-23.9988	59.9977	4.92704	TRUE	5.71047	EXPANDED	-1.66346	7.37393	TRUE
OG0007843	-34.909	75.818	-29.9169	71.8338	3.98427	TRUE	0.142275	EXPANDED	-0.120008	0.262283	TRUE
OG0007881	-31.2044	68.4088	-27.0376	66.0752	2.33359	TRUE	0.0013403	EXPANDED	-0.172776	0.174116	TRUE
OG0007939	-34.3587	74.7175	-27.3065	66.6129	8.10458	TRUE	0.0549558	EXPANDED	-0.0111741	0.0661299	TRUE
OG0007947	-31.4349	68.8698	-23.9339	59.8678	9.00207	TRUE	1.35231	EXPANDED	-0.0461817	1.39849	TRUE
OG0008007	-31.0862	68.1723	-25.2277	62.4554	5.71693	TRUE	0.801469	EXPANDED	-0.292029	1.0935	TRUE
OG0008040	-39.2204	84.4409	-32.0048	76.0096	8.43127	TRUE	1.60936	EXPANDED	-0.313404	1.92276	TRUE
OG0008172	-31.5913	69.1827	-26.5935	65.1869	3.99575	TRUE	0.80884	EXPANDED	-0.262521	1.07136	TRUE
OG0008209	-34.8955	75.7911	-27.0615	66.123	9.66809	TRUE	1.69778	EXPANDED	-0.142803	1.84058	TRUE
OG0008219	-38.8513	83.7026	-33.2603	78.5206	5.18207	TRUE	0.154388	EXPANDED	-0.350703	0.505091	TRUE
OG0008240	-34.6913	75.3827	-30.3795	72.7589	2.62373	TRUE	1.80712	EXPANDED	-0.273289	2.08041	TRUE
OG0008516	-26.8975	59.795	-22.821	57.642	2.15304	TRUE	2.52001	EXPANDED	-0.249162	2.76917	TRUE
OG0008522	-36.3965	78.793	-30.1986	72.3972	6.39587	TRUE	1.9158	EXPANDED	-0.111107	2.02691	TRUE
OG0008645	-32.5713	71.1426	-27.7508	67.5015	3.64106	TRUE	2.63659	EXPANDED	-0.655827	3.29242	TRUE
OG0008708	-34.018	74.0361	-27.9384	67.8769	6.15923	TRUE	1.73809	EXPANDED	-0.14546	1.88355	TRUE
OG0008709	-21.6176	49.2352	-15.7381	43.4763	5.75897	TRUE	1.21179	EXPANDED	-0.137791	1.34958	TRUE
OG0008716	-33.5867	73.1734	-29.1657	70.3314	2.84199	TRUE	3.00766	EXPANDED	-0.20677	3.21443	TRUE
OG0008860	-34.9234	75.8468	-30.7789	73.5579	2.28889	TRUE	2.36e-05	EXPANDED	-22.0959	22.0959	TRUE
OG0009470	-29.5522	65.1044	-24.7553	61.5107	3.59373	TRUE	1.12992	EXPANDED	-0.719384	1.8493	TRUE
OG0009785	-24.7149	55.4299	-20.2338	52.4676	2.96229	TRUE	0.0261886	EXPANDED	-1.19588	1.22207	TRUE
OG0009811	-14.2049	34.4098	-9.75713	31.5143	2.89549	TRUE	1.35685	EXPANDED	5.21682	-3.85997	FALSE
OG0009970	-24.9531	55.9061	-19.9029	51.8058	4.10034	TRUE	0.913937	EXPANDED	-0.335082	1.24902	TRUE
OG0010071	-18.0436	42.0871	-13.5677	39.1354	2.9517	TRUE	1.02273	EXPANDED	-0.428351	1.45108	TRUE
OG0010315	-18.2326	42.4652	-6.05987	24.1197	18.3454	TRUE	10.649	EXPANDED	-24.9041	35.5531	TRUE
OG0010530	-23.2583	52.5165	-18.5482	49.0964	3.42009	TRUE	0.817406	EXPANDED	-0.304658	1.12206	TRUE
OG0010676	-16.0602	38.1204	-11.0892	34.1783	3.94207	TRUE	5.09933	EXPANDED	-5.01474	10.1141	TRUE
OG0010686	-11.8232	29.6465	-7.53456	27.0691	2.57737	TRUE	1.72799	EXPANDED	0.0043474	1.72364	TRUE
OG0011081	-17.9668	41.9336	-13.5693	39.1386	2.79493	TRUE	1.11052	EXPANDED	-1.54313	2.65365	TRUE
OG0011092	-13.17	32.34	-8.58767	29.1753	3.16466	TRUE	8.37022	EXPANDED	-4.41306	12.7833	TRUE
OG0012266	-16.9127	39.8254	-12.4627	36.9255	2.89989	TRUE	0.768361	EXPANDED	-1.30223	2.07059	TRUE
OG0012268	-17.0426	40.0851	-12.4022	36.8043	3.28081	TRUE	1.8212	EXPANDED	2.10255	-0.28135	FALSE
OG0012276	-16.4994	38.9989	-12.2858	36.5717	2.42723	TRUE	1.28662	EXPANDED	-1.01915	2.30577	TRUE
OG0013189	-11.0912	28.1823	-6.26437	24.5287	3.65359	TRUE	0.24624	EXPANDED	-2.54527	2.79151	TRUE
OG0013303	-11.4352	28.8705	-6.94722	25.8944	2.97605	TRUE	3.4983	EXPANDED	-11.9705	15.4688	TRUE
OG0013306	-15.266	36.5321	-9.4206	30.8412	5.69087	TRUE	4.4472	EXPANDED	-2.01779	6.46499	TRUE
OG0013833	-13.1017	32.2034	-8.87683	29.7537	2.44978	TRUE	0.329621	EXPANDED	-1.51351	1.84313	TRUE
OG0014806	-13.0392	32.0783	-6.64538	25.2908	6.78754	TRUE	0.712418	EXPANDED	0.0607491	0.651669	TRUE
OG0014810	-12.9787	31.9574	-8.24807	28.4961	3.46131	TRUE	1.24975	EXPANDED	0.497332	0.752418	TRUE
OG0014920	-10.8222	27.6444	-6.45849	24.917	2.72741	TRUE	2.61785	EXPANDED	-2.36548	4.98333	TRUE
OG0014921	-10.8262	27.6523	-6.55355	25.1071	2.54522	TRUE	2.6563	EXPANDED	-2.02134	4.67764	TRUE
OG0014923	-10.8222	27.6444	-6.45849	24.917	2.72741	TRUE	2.61785	EXPANDED	-2.36548	4.98333	TRUE
OG0014928	-11.0912	28.1823	-6.26437	24.5287	3.65359	TRUE	0.24624	EXPANDED	-2.54527	2.79151	TRUE
OG0014930	-11.0912	28.1823	-6.26437	24.5287	3.65359	TRUE	0.24624	EXPANDED	-2.54527	2.79151	TRUE
OG0014933	-11.0912	28.1823	-6.26437	24.5287	3.65359	TRUE	0.24624	EXPANDED	-2.54527	2.79151	TRUE
OG0014969	-13.1871	32.3742	-9.04035	30.0807	2.29345	TRUE	0.926319	EXPANDED	-2.04925	2.97557	TRUE
OG0000048	-103.719	213.437	-96.385	204.77	8.66744	TRUE	-1.76694	CONTRACTED	0.195589	-1.96253	TRUE
OG0000049	-121.469	248.938	-117.359	246.717	2.22105	TRUE	-10.8899	CONTRACTED	-0.0833113	-10.8066	TRUE
OG0000058	-116.899	239.798	-111.67	235.34	4.45786	TRUE	-5.1658	CONTRACTED	-0.526701	-4.6391	TRUE
OG0000072	-103.356	212.712	-99.3092	210.618	2.09391	TRUE	-2.31945	CONTRACTED	-0.428896	-1.89055	TRUE
OG0000089	-83.9545	173.909	-78.5144	169.029	4.88033	TRUE	-0.814736	CONTRACTED	-0.0223398	-0.792396	TRUE
OG0000162	-72.3739	150.748	-68.2228	148.446	2.30209	TRUE	-3.12101	CONTRACTED	-0.235245	-2.88577	TRUE
OG0000172	-101.301	208.602	-96.6597	205.319	3.28227	TRUE	-1076370	CONTRACTED	-8265590	7189220	FALSE
OG0000178	-84.092	174.184	-76.3375	164.675	9.50888	TRUE	-8.2682	CONTRACTED	-1.3307	-6.9375	TRUE
OG0000184	-76.1629	158.326	-65.3916	142.783	15.5426	TRUE	-1.55922	CONTRACTED	-2e-06	-1.55922	TRUE
OG0000192	-73.5974	153.195	-67.2173	146.435	6.76025	TRUE	-2.10288	CONTRACTED	0.0765543	-2.17943	TRUE
OG0000194	-65.9982	137.996	-55.4983	122.997	14.9998	TRUE	-1.41393	CONTRACTED	0.0682275	-1.48216	TRUE
OG0000196	-73.251	152.502	-69.2075	150.415	2.08695	TRUE	-0.177315	CONTRACTED	-0.0980493	-0.0792657	TRUE
OG0000199	-91.3645	188.729	-86.3113	184.623	4.10627	TRUE	-7.06343	CONTRACTED	-1.32484	-5.73859	TRUE
OG0000222	-93.4235	192.847	-89.3075	190.615	2.23207	TRUE	-7.93287	CONTRACTED	-0.662741	-7.27013	TRUE
OG0000270	-77.3487	160.697	-73.1354	158.271	2.42657	TRUE	-1.28466	CONTRACTED	0.20279	-1.48745	TRUE
OG0000317	-66.5608	139.122	-60.7449	133.49	5.63182	TRUE	-1.28361	CONTRACTED	-0.0908043	-1.19281	TRUE
OG0000337	-86.0417	178.083	-82.0172	176.034	2.04892	TRUE	-8.01071	CONTRACTED	-4.79037	-3.22034	TRUE
OG0000346	-73.2013	152.403	-65.9343	143.869	8.53398	TRUE	-4.85068	CONTRACTED	0.200724	-5.0514	TRUE
OG0000392	-84.523	175.046	-76.336	164.672	10.374	TRUE	-11.8253	CONTRACTED	-0.882657	-10.9426	TRUE
OG0000433	-71.6448	149.29	-67.5137	147.027	2.26219	TRUE	-1.52255	CONTRACTED	0.290269	-1.81282	TRUE
OG0000459	-53.6073	113.215	-48.5497	109.099	4.1152	TRUE	-2.83163	CONTRACTED	0.0914933	-2.92312	TRUE
OG0000471	-77.7757	161.551	-73.7369	159.474	2.07763	TRUE	-2.25685	CONTRACTED	-0.60487	-1.65198	TRUE
OG0000517	-55.0831	116.166	-38.9178	89.8357	26.3306	TRUE	-2.39594	CONTRACTED	0.11327	-2.50921	TRUE
OG0000551	-59.9622	125.924	-53.7489	119.498	6.42655	TRUE	-1.74714	CONTRACTED	0.0963266	-1.84347	TRUE
OG0000555	-47.6362	101.272	-39.9961	91.9921	9.28027	TRUE	-1.14253	CONTRACTED	-0.0145096	-1.12802	TRUE
OG0000577	-62.629	131.258	-55.9707	123.941	7.31675	TRUE	-1.86773	CONTRACTED	0.0735245	-1.94125	TRUE
OG0000605	-64.4461	134.892	-58.2032	128.406	6.48582	TRUE	-14.4414	CONTRACTED	-0.35122	-14.0902	TRUE
OG0000609	-67.7524	141.505	-60.6531	133.306	8.19853	TRUE	-0.163885	CONTRACTED	0.241442	-0.405327	TRUE
OG0000618	-79.3576	164.715	-75.1478	162.296	2.41963	TRUE	-6.29328	CONTRACTED	-5.14794	-1.14534	TRUE
OG0000620	-44.1284	94.2567	-33.9861	79.9723	14.2844	TRUE	-0.560515	CONTRACTED	0.0839843	-0.644499	TRUE
OG0000627	-49.6004	105.201	-40.0165	92.0329	13.168	TRUE	-0.0542267	CONTRACTED	-5.85e-05	-0.0541682	TRUE
OG0000634	-56.3407	118.681	-52.3324	116.665	2.01646	TRUE	-0.0038534	CONTRACTED	-0.115454	0.111601	FALSE
OG0000648	-70.6666	147.333	-60.8864	133.773	13.5605	TRUE	-1.77811	CONTRACTED	0.363615	-2.14173	TRUE
OG0000653	-55.0394	116.079	-42.7413	97.4827	18.5962	TRUE	-1.97934	CONTRACTED	0.0698262	-2.04917	TRUE
OG0000667	-46.1239	98.2477	-41.1642	94.3284	3.91933	TRUE	-0.25896	CONTRACTED	0.0319665	-0.290927	TRUE
OG0000709	-73.1992	152.398	-69.1133	150.227	2.17177	TRUE	-5.07796	CONTRACTED	-0.239493	-4.83847	TRUE
OG0000713	-66.8199	139.64	-57.1224	126.245	13.395	TRUE	-1.0686	CONTRACTED	0.340803	-1.4094	TRUE
OG0000723	-37.6461	81.2923	-31.3102	74.6203	6.67198	TRUE	-0.329626	CONTRACTED	-0.0133869	-0.316239	TRUE
OG0000728	-52.1299	110.26	-47.2953	106.591	3.66923	TRUE	-1.84262	CONTRACTED	0.0541071	-1.89673	TRUE
OG0000736	-58.916	123.832	-48.4206	108.841	14.9908	TRUE	-2.17184	CONTRACTED	0.0290918	-2.20093	TRUE
OG0000758	-62.1083	130.217	-57.8362	127.672	2.54426	TRUE	-0.507186	CONTRACTED	0.0595584	-0.566744	TRUE
OG0000761	-63.0611	132.122	-57.9721	127.944	4.178	TRUE	-2.60601	CONTRACTED	-0.0556889	-2.55032	TRUE
OG0000767	-36.7898	79.5797	-30.8552	73.7103	5.86934	TRUE	-1.60142	CONTRACTED	0.0289594	-1.63038	TRUE
OG0000807	-56.9234	119.847	-52.1852	116.37	3.47641	TRUE	-1.45487	CONTRACTED	0.129822	-1.58469	TRUE
OG0000830	-66.7265	139.453	-62.3869	136.774	2.67917	TRUE	-3.58945	CONTRACTED	-0.487949	-3.1015	TRUE
OG0000834	-70.6003	147.201	-66.4091	144.818	2.38236	TRUE	-745.269	CONTRACTED	-0.837333	-744.432	TRUE
OG0000847	-53.3978	112.796	-45.2088	102.418	10.3782	TRUE	-0.439022	CONTRACTED	-0.135814	-0.303208	TRUE
OG0000849	-69.392	144.784	-64.1634	140.327	4.45721	TRUE	-1.38568	CONTRACTED	0.329574	-1.71525	TRUE
OG0000870	-59.8412	125.682	-54.2194	120.439	5.24343	TRUE	-0.841745	CONTRACTED	-0.112552	-0.729193	TRUE
OG0000928	-53.4142	112.828	-45.841	103.682	9.1464	TRUE	-2.55503	CONTRACTED	0.0722519	-2.62728	TRUE
OG0000961	-64.0962	134.192	-58.2333	128.467	5.72577	TRUE	-0.889439	CONTRACTED	0.288973	-1.17841	TRUE
OG0000966	-67.4167	140.833	-60.6874	133.375	7.45868	TRUE	-2.40061	CONTRACTED	0.217409	-2.61802	TRUE
OG0000971	-61.6535	129.307	-57.5584	127.117	2.19023	TRUE	-1.27519	CONTRACTED	0.181571	-1.45676	TRUE
OG0000988	-54.3528	114.706	-45.2752	102.55	12.1551	TRUE	-1.21365	CONTRACTED	-0.0590346	-1.15462	TRUE
OG0001008	-61.5978	129.196	-51.1835	114.367	14.8287	TRUE	-4.15185	CONTRACTED	0.310152	-4.462	TRUE
OG0001110	-53.8788	113.758	-47.2532	106.506	7.25114	TRUE	-2.29564	CONTRACTED	-0.0341675	-2.26147	TRUE
OG0001123	-50.2188	106.438	-45.9513	103.903	2.53509	TRUE	-2.05461	CONTRACTED	-0.280871	-1.77374	TRUE
OG0001126	-54.1506	114.301	-45.9959	103.992	10.3094	TRUE	-1.10776	CONTRACTED	0.0340034	-1.14176	TRUE
OG0001127	-60.0899	126.18	-52.5309	117.062	9.11795	TRUE	-4.77039	CONTRACTED	0.223242	-4.99363	TRUE
OG0001154	-57.3717	120.743	-52.8075	117.615	3.12832	TRUE	-2.18827	CONTRACTED	0.0982438	-2.28651	TRUE
OG0001182	-62.1209	130.242	-52.0006	116.001	14.2406	TRUE	-3.25213	CONTRACTED	0.291066	-3.5432	TRUE
OG0001188	-63.6088	133.218	-55.4666	122.933	10.2844	TRUE	-0.10979	CONTRACTED	0.275879	-0.385669	TRUE
OG0001223	-61.4553	128.911	-50.3579	112.716	16.1948	TRUE	-0.217568	CONTRACTED	0.255015	-0.472583	TRUE
OG0001228	-62.819	131.638	-56.7356	125.471	6.16684	TRUE	-1.12068	CONTRACTED	0.264253	-1.38493	TRUE
OG0001231	-60.1151	126.23	-54.4686	120.937	5.29294	TRUE	-1.84098	CONTRACTED	0.092067	-1.93305	TRUE
OG0001240	-59.8466	125.693	-45.4323	102.865	22.8288	TRUE	-2.23609	CONTRACTED	0.209365	-2.44545	TRUE
OG0001284	-52.6201	111.24	-43.0701	98.1402	13.1	TRUE	-0.65201	CONTRACTED	-0.0433506	-0.608659	TRUE
OG0001290	-45.6643	97.3286	-41.5791	95.1581	2.17044	TRUE	-2.06773	CONTRACTED	0.0700789	-2.13781	TRUE
OG0001334	-56.8048	119.61	-49.4648	110.93	8.67986	TRUE	-0.404822	CONTRACTED	0.23833	-0.643152	TRUE
OG0001345	-59.3018	124.604	-54.1714	120.343	4.26078	TRUE	-2.16886	CONTRACTED	0.204224	-2.37308	TRUE
OG0001357	-56.4408	118.882	-45.813	103.626	15.2555	TRUE	-1.98619	CONTRACTED	0.267551	-2.25374	TRUE
OG0001363	-61.4451	128.89	-55.1701	122.34	6.54996	TRUE	-1.58018	CONTRACTED	0.235415	-1.81559	TRUE
OG0001387	-50.7228	107.446	-41.534	95.0679	12.3777	TRUE	-0.641013	CONTRACTED	0.233342	-0.874355	TRUE
OG0001402	-51.6733	109.347	-47.6708	107.342	2.00481	TRUE	-0.399428	CONTRACTED	0.0598503	-0.459278	TRUE
OG0001404	-58.9271	123.854	-48.5318	109.064	14.7906	TRUE	-0.352155	CONTRACTED	0.211719	-0.563874	TRUE
OG0001410	-54.0068	114.014	-47.2358	106.472	7.54187	TRUE	-2.721	CONTRACTED	0.204732	-2.92573	TRUE
OG0001418	-59.2802	124.56	-53.7849	119.57	4.99063	TRUE	-1.36805	CONTRACTED	0.235489	-1.60354	TRUE
OG0001428	-54.7187	115.437	-45.6935	103.387	12.0505	TRUE	-1.42533	CONTRACTED	0.143876	-1.56921	TRUE
OG0001435	-63.0014	132.003	-55.9976	123.995	8.00747	TRUE	-4.31039	CONTRACTED	0.0447833	-4.35517	TRUE
OG0001459	-55.0703	116.141	-42.649	97.2981	18.8425	TRUE	-0.442305	CONTRACTED	0.21088	-0.653185	TRUE
OG0001460	-56.1772	118.354	-49.0178	110.036	8.31884	TRUE	-0.888556	CONTRACTED	0.208897	-1.09745	TRUE
OG0001467	-53.5335	113.067	-44.6204	101.241	11.8264	TRUE	-0.628061	CONTRACTED	0.198227	-0.826288	TRUE
OG0001479	-55.296	116.592	-48.4239	108.848	7.74431	TRUE	-1.66883	CONTRACTED	0.109103	-1.77793	TRUE
OG0001486	-56.4104	118.821	-51.6698	115.34	3.48123	TRUE	-0.818053	CONTRACTED	0.265073	-1.08313	TRUE
OG0001501	-51.1821	108.364	-43.678	99.356	9.00821	TRUE	-0.28255	CONTRACTED	0.201374	-0.483924	TRUE
OG0001523	-55.8807	117.761	-51.269	114.538	3.22343	TRUE	-1.73285	CONTRACTED	0.235497	-1.96835	TRUE
OG0001528	-53.8336	113.667	-46.3613	104.723	8.94458	TRUE	-0.11087	CONTRACTED	0.118716	-0.229586	TRUE
OG0001537	-53.1002	112.2	-48.274	108.548	3.65248	TRUE	-0.883117	CONTRACTED	-0.133866	-0.749251	TRUE
OG0001561	-55.6945	117.389	-50.9598	113.92	3.46924	TRUE	-0.187105	CONTRACTED	-0.0173856	-0.169719	TRUE
OG0001568	-55.2327	116.465	-51.0476	114.095	2.37021	TRUE	-9.17406	CONTRACTED	-0.246562	-8.9275	TRUE
OG0001584	-58.0462	122.092	-50.7555	113.511	8.58143	TRUE	-4.01824	CONTRACTED	0.244339	-4.26258	TRUE
OG0001585	-54.5059	115.012	-50.0091	112.018	2.9937	TRUE	-0.333051	CONTRACTED	-0.0437235	-0.289327	TRUE
OG0001617	-66.7285	139.457	-60.366	132.732	6.72515	TRUE	-5.16848	CONTRACTED	-0.558077	-4.6104	TRUE
OG0001638	-50.0281	106.056	-45.7588	103.518	2.53867	TRUE	-0.319076	CONTRACTED	-0.0474342	-0.271642	TRUE
OG0001640	-56.1681	118.336	-52.0867	116.173	2.1627	TRUE	-0.424574	CONTRACTED	0.145758	-0.570332	TRUE
OG0001656	-50.4033	106.807	-41.4657	94.9313	11.8752	TRUE	-0.766203	CONTRACTED	-0.183626	-0.582577	TRUE
OG0001661	-58.5408	123.082	-50.9745	113.949	9.13254	TRUE	-0.32059	CONTRACTED	0.257124	-0.577714	TRUE
OG0001662	-53.5157	113.031	-47.2916	106.583	6.44823	TRUE	-1.44261	CONTRACTED	-0.192328	-1.25028	TRUE
OG0001678	-47.3792	100.758	-41.445	94.89	5.86831	TRUE	-0.72778	CONTRACTED	0.181283	-0.909063	TRUE
OG0001690	-58.5039	123.008	-53.2396	118.479	4.52863	TRUE	-1.54708	CONTRACTED	0.197466	-1.74455	TRUE
OG0001717	-53.841	113.682	-48.7324	109.465	4.21716	TRUE	-1.94179	CONTRACTED	0.245775	-2.18756	TRUE
OG0001737	-47.8113	101.623	-38.5902	89.1803	12.4424	TRUE	-0.924482	CONTRACTED	-0.0385862	-0.885896	TRUE
OG0001741	-45.3291	96.6582	-40.9205	93.8409	2.81725	TRUE	-1.35429	CONTRACTED	0.255616	-1.60991	TRUE
OG0001743	-52.4193	110.839	-39.4554	90.9108	19.9278	TRUE	-0.771419	CONTRACTED	0.137373	-0.908792	TRUE
OG0001744	-50.479	106.958	-42.1364	96.2729	10.6852	TRUE	-0.176111	CONTRACTED	0.171685	-0.347796	TRUE
OG0001747	-53.2698	112.54	-49.0162	110.032	2.50712	TRUE	-3.21729	CONTRACTED	-0.0085125	-3.20878	TRUE
OG0001770	-55.6058	117.212	-51.5648	115.13	2.08184	TRUE	-0.0969082	CONTRACTED	0.148635	-0.245543	TRUE
OG0001773	-51.1778	108.356	-44.3	100.6	7.75549	TRUE	-1.30436	CONTRACTED	0.11842	-1.42278	TRUE
OG0001777	-54.141	114.282	-50.0918	112.184	2.09848	TRUE	-2.12564	CONTRACTED	-0.284104	-1.84154	TRUE
OG0001780	-52.3628	110.726	-47.9463	107.893	2.83301	TRUE	-1.10266	CONTRACTED	0.0812913	-1.18395	TRUE
OG0001789	-53.48	112.96	-47.7078	107.416	5.54437	TRUE	-0.423824	CONTRACTED	0.0559111	-0.479735	TRUE
OG0001794	-56.4641	118.928	-50.1648	112.33	6.59871	TRUE	-2.60609	CONTRACTED	0.196617	-2.80271	TRUE
OG0001811	-49.931	105.862	-44.6417	101.283	4.57855	TRUE	-0.621189	CONTRACTED	0.0838793	-0.705068	TRUE
OG0001813	-56.8486	119.697	-50.9772	113.954	5.74281	TRUE	-1.41683	CONTRACTED	0.204251	-1.62108	TRUE
OG0001822	-52.3759	110.752	-46.966	105.932	4.81989	TRUE	-0.617508	CONTRACTED	0.0961482	-0.713656	TRUE
OG0001827	-51.6196	109.239	-47.6144	107.229	2.01038	TRUE	-0.377537	CONTRACTED	0.185033	-0.56257	TRUE
OG0001828	-47.6907	101.381	-40.6027	93.2054	8.17603	TRUE	-0.517712	CONTRACTED	0.20488	-0.722592	TRUE
OG0001852	-43.5438	93.0877	-39.3906	90.7812	2.30651	TRUE	-1.5209	CONTRACTED	0.197389	-1.71829	TRUE
OG0001862	-52.7116	111.423	-47.3938	106.788	4.63562	TRUE	-0.741504	CONTRACTED	0.227624	-0.969128	TRUE
OG0001865	-53.5052	113.01	-48.2486	108.497	4.51336	TRUE	-0.968578	CONTRACTED	0.181767	-1.15035	TRUE
OG0001892	-55.8479	117.696	-48.6953	109.391	8.30529	TRUE	-2.79849	CONTRACTED	0.169521	-2.96801	TRUE
OG0001896	-46.2238	98.4475	-36.8486	85.6972	12.7503	TRUE	-2.28931	CONTRACTED	-0.149742	-2.13957	TRUE
OG0001909	-50.6476	107.295	-42.7078	97.4156	9.87958	TRUE	-0.390503	CONTRACTED	0.200162	-0.590665	TRUE
OG0001931	-51.0171	108.034	-45.2802	102.56	5.47373	TRUE	-0.173565	CONTRACTED	-1.46e-05	-0.17355	TRUE
OG0001938	-49.4044	104.809	-43.0248	98.0497	6.75919	TRUE	-1.3569	CONTRACTED	0.159476	-1.51638	TRUE
OG0001952	-53.4569	112.914	-49.1349	110.27	2.64404	TRUE	-0.506202	CONTRACTED	0.167429	-0.673631	TRUE
OG0001959	-44.6075	95.215	-37.1754	86.3508	8.86425	TRUE	-2.13497	CONTRACTED	0.0141816	-2.14915	TRUE
OG0001963	-51.0991	108.198	-40.6161	93.2323	14.9659	TRUE	-2.95979	CONTRACTED	0.15188	-3.11167	TRUE
OG0001971	-48.4782	102.956	-41.6514	95.3028	7.65371	TRUE	-0.326164	CONTRACTED	-0.027727	-0.298437	TRUE
OG0001973	-53.2981	112.596	-48.026	108.052	4.54421	TRUE	-1.22771	CONTRACTED	0.190793	-1.4185	TRUE
OG0001974	-50.205	106.41	-44.1234	100.247	6.16319	TRUE	-1.01028	CONTRACTED	0.147882	-1.15816	TRUE
OG0001982	-53.1878	112.376	-47.7591	107.518	4.85737	TRUE	-1.80275	CONTRACTED	0.115353	-1.9181	TRUE
OG0001986	-46.3208	98.6416	-40.6167	93.2335	5.40815	TRUE	-0.69875	CONTRACTED	0.191757	-0.890507	TRUE
OG0001997	-51.1502	108.3	-42.0028	96.0055	12.2948	TRUE	-1.30626	CONTRACTED	-1.51e-05	-1.30624	TRUE
OG0001999	-56.2968	118.594	-49.2176	110.435	8.15836	TRUE	-1.98914	CONTRACTED	0.260214	-2.24935	TRUE
OG0002000	-42.8359	91.6717	-35.8414	83.6828	7.9889	TRUE	-1.04573	CONTRACTED	-0.0468049	-0.998925	TRUE
OG0002006	-45.3151	96.6303	-40.9326	93.8652	2.76507	TRUE	-2.57328	CONTRACTED	-0.0472608	-2.52602	TRUE
OG0002024	-48.3414	102.683	-41.4145	94.829	7.85383	TRUE	-1.03514	CONTRACTED	0.059803	-1.09494	TRUE
OG0002025	-62.8998	131.8	-58.8262	129.652	2.14715	TRUE	-1.85452	CONTRACTED	0.0391053	-1.89363	TRUE
OG0002026	-44.1495	94.2991	-35.5782	83.1565	11.1426	TRUE	-0.132685	CONTRACTED	0.049984	-0.182669	TRUE
OG0002028	-47.1294	100.259	-41.6794	95.3589	4.89982	TRUE	-3.12975	CONTRACTED	0.0332569	-3.16301	TRUE
OG0002037	-46.4986	98.9972	-38.2091	88.4182	10.5789	TRUE	-1.16661	CONTRACTED	0.175774	-1.34238	TRUE
OG0002080	-53.3252	112.65	-45.9739	103.948	8.7026	TRUE	-2.48632	CONTRACTED	0.205553	-2.69187	TRUE
OG0002084	-40.9114	87.8228	-35.5361	83.0722	4.75061	TRUE	-0.532479	CONTRACTED	0.185174	-0.717653	TRUE
OG0002087	-53.7693	113.539	-37.579	87.158	26.3805	TRUE	-0.24866	CONTRACTED	0.129262	-0.377922	TRUE
OG0002098	-52.6249	111.25	-41.1575	94.3149	16.935	TRUE	-0.610526	CONTRACTED	0.170434	-0.78096	TRUE
OG0002100	-43.6181	93.2361	-36.9992	85.9983	7.23777	TRUE	-0.204058	CONTRACTED	0	-0.204058	TRUE
OG0002114	-48.4137	102.827	-41.6109	95.2218	7.60556	TRUE	-0.433804	CONTRACTED	-0.0450425	-0.388762	TRUE
OG0002122	-48.2786	102.557	-37.8658	87.7316	14.8256	TRUE	-1.47518	CONTRACTED	0.15787	-1.63305	TRUE
OG0002126	-44.7204	95.4408	-34.3784	80.7568	14.684	TRUE	-0.710867	CONTRACTED	0.0898658	-0.800733	TRUE
OG0002134	-42.3218	90.6435	-31.097	74.194	16.4495	TRUE	-2.67417	CONTRACTED	0.0762234	-2.75039	TRUE
OG0002142	-50.6685	107.337	-44.9675	101.935	5.40214	TRUE	-0.967956	CONTRACTED	0.113472	-1.08143	TRUE
OG0002144	-34.1841	74.3682	-28.4158	68.8317	5.53655	TRUE	-0.834983	CONTRACTED	0	-0.834983	TRUE
OG0002163	-55.9067	117.813	-51.1899	114.38	3.43358	TRUE	-0.405188	CONTRACTED	0.199903	-0.605091	TRUE
OG0002179	-45.0798	96.1597	-39.8564	91.7128	4.44693	TRUE	-0.0829865	CONTRACTED	0.0279764	-0.110963	TRUE
OG0002183	-51.5533	109.107	-46.3008	104.602	4.50494	TRUE	-0.720168	CONTRACTED	0.201882	-0.92205	TRUE
OG0002187	-57.2997	120.599	-47.1221	106.244	14.3551	TRUE	-2.20906	CONTRACTED	0.175822	-2.38488	TRUE
OG0002214	-40.9332	87.8664	-35.7546	83.5092	4.35721	TRUE	-1.32333	CONTRACTED	0.11159	-1.43492	TRUE
OG0002231	-48.8194	103.639	-38.1748	88.3495	15.2893	TRUE	-1.10332	CONTRACTED	-0.0264374	-1.07688	TRUE
OG0002240	-35.9379	77.8758	-31.669	75.338	2.53779	TRUE	-1.54802	CONTRACTED	0.122524	-1.67054	TRUE
OG0002244	-51.3	108.6	-45.4288	102.858	5.74231	TRUE	-0.20414	CONTRACTED	0.127877	-0.332017	TRUE
OG0002257	-51.5457	109.091	-42.9662	97.9325	11.1589	TRUE	-0.0355008	CONTRACTED	0.128662	-0.164163	TRUE
OG0002262	-47.4299	100.86	-33.8652	79.7304	21.1294	TRUE	-0.486002	CONTRACTED	0.103121	-0.589123	TRUE
OG0002267	-50.7288	107.458	-38.3904	88.7809	18.6767	TRUE	-1.08907	CONTRACTED	0.0116896	-1.10076	TRUE
OG0002268	-48.8479	103.696	-44.4372	100.874	2.82135	TRUE	-0.930199	CONTRACTED	0.0046447	-0.934844	TRUE
OG0002271	-52.0982	110.196	-46.2985	104.597	5.59952	TRUE	-0.247165	CONTRACTED	0.0914676	-0.338633	TRUE
OG0002275	-48.4971	102.994	-41.1188	94.2376	8.75673	TRUE	-1.14379	CONTRACTED	2.41e-05	-1.14381	TRUE
OG0002279	-41.2084	88.4168	-32.6674	77.3348	11.082	TRUE	-0.672295	CONTRACTED	0.0891188	-0.761414	TRUE
OG0002285	-47.2757	100.551	-42.6929	97.3858	3.16552	TRUE	-0.0574025	CONTRACTED	0.16037	-0.217773	TRUE
OG0002289	-40.8668	87.7335	-33.6938	79.3875	8.34604	TRUE	-1.68341	CONTRACTED	0.0135872	-1.697	TRUE
OG0002291	-51.5483	109.097	-37.4254	86.8508	22.2458	TRUE	-5.11474	CONTRACTED	0.0782475	-5.19299	TRUE
OG0002293	-52.1067	110.213	-43.3689	98.7379	11.4754	TRUE	-0.85778	CONTRACTED	0.172063	-1.02984	TRUE
OG0002302	-53.5459	113.092	-47.4535	106.907	6.18471	TRUE	-1.58146	CONTRACTED	0.168043	-1.7495	TRUE
OG0002316	-43.5446	93.0892	-37.8958	87.7915	5.2977	TRUE	-0.0578723	CONTRACTED	0.152204	-0.210076	TRUE
OG0002328	-47.9328	101.866	-43.884	99.768	2.09757	TRUE	-2.7407	CONTRACTED	-0.222769	-2.51793	TRUE
OG0002344	-50.1832	106.366	-43.2639	98.5278	7.83866	TRUE	-0.407952	CONTRACTED	0.133926	-0.541878	TRUE
OG0002349	-50.0049	106.01	-42.2116	96.4231	9.58674	TRUE	-1.44951	CONTRACTED	0.0404675	-1.48998	TRUE
OG0002351	-49.0455	104.091	-43.5286	99.0571	5.03389	TRUE	-2.49012	CONTRACTED	0.189526	-2.67965	TRUE
OG0002353	-49.2212	104.442	-44.9934	101.987	2.4556	TRUE	-0.394919	CONTRACTED	0.0825975	-0.477517	TRUE
OG0002361	-43.2257	92.4514	-35.908	83.8161	8.63533	TRUE	-1.9095	CONTRACTED	0.140917	-2.05042	TRUE
OG0002366	-47.2407	100.481	-40.4884	92.9768	7.50472	TRUE	-0.0861961	CONTRACTED	0.11423	-0.200426	TRUE
OG0002370	-46.9161	99.8321	-41.0424	94.0848	5.7473	TRUE	-1.05233	CONTRACTED	0.0402458	-1.09258	TRUE
OG0002372	-39.3688	84.7376	-35.1847	82.3694	2.3682	TRUE	-0.663486	CONTRACTED	0.173689	-0.837175	TRUE
OG0002376	-40.4466	86.8931	-32.7369	77.4739	9.41928	TRUE	-2.2576	CONTRACTED	0.157221	-2.41482	TRUE
OG0002379	-50.9422	107.884	-46.5662	105.132	2.75201	TRUE	-0.88342	CONTRACTED	-0.0679182	-0.815502	TRUE
OG0002380	-47.0215	100.043	-39.6193	91.2386	8.80438	TRUE	-2.36666	CONTRACTED	-0.0072995	-2.35936	TRUE
OG0002393	-49.2465	104.493	-43.9323	99.8647	4.62837	TRUE	-0.358923	CONTRACTED	-0.24281	-0.116113	TRUE
OG0002395	-35.4671	76.9343	-30.4313	72.8626	4.07171	TRUE	-1.30974	CONTRACTED	0.149953	-1.45969	TRUE
OG0002400	-42.4321	90.8643	-38.3042	88.6084	2.25586	TRUE	-1.30102	CONTRACTED	0.102358	-1.40338	TRUE
OG0002404	-45.5647	97.1294	-40.2454	92.4907	4.63862	TRUE	-1.30342	CONTRACTED	-0.0363248	-1.2671	TRUE
OG0002406	-50.8628	107.726	-44.7268	101.454	6.27191	TRUE	-0.549262	CONTRACTED	-1e-07	-0.549262	TRUE
OG0002421	-41.6877	89.3755	-37.3951	86.7902	2.58534	TRUE	-0.778145	CONTRACTED	0.153321	-0.931466	TRUE
OG0002427	-54.2847	114.569	-46.4448	104.89	9.67986	TRUE	-1.5705	CONTRACTED	0.178205	-1.7487	TRUE
OG0002428	-39.575	85.1501	-34.2957	80.5913	4.55873	TRUE	-1.56847	CONTRACTED	0.156929	-1.7254	TRUE
OG0002430	-45.1359	96.2718	-40.2093	92.4186	3.85319	TRUE	-1.49157	CONTRACTED	0.0553284	-1.5469	TRUE
OG0002454	-48.4256	102.851	-40.1421	92.2843	10.5669	TRUE	-0.816022	CONTRACTED	0.0594069	-0.875429	TRUE
OG0002457	-44.3726	94.7453	-38.2765	88.5531	6.19223	TRUE	-0.547644	CONTRACTED	0.171997	-0.719641	TRUE
OG0002466	-34.3859	74.7717	-29.8602	71.7205	3.05128	TRUE	-0.401404	CONTRACTED	0.0291907	-0.430595	TRUE
OG0002469	-41.3538	88.7076	-37.1677	86.3353	2.37226	TRUE	-0.0691787	CONTRACTED	-0.175482	0.106303	FALSE
OG0002472	-43.0684	92.1368	-36.1178	84.2356	7.90122	TRUE	-0.773526	CONTRACTED	0.0844082	-0.857934	TRUE
OG0002473	-48.8012	103.602	-38.9354	89.8709	13.7315	TRUE	-0.72134	CONTRACTED	0.122242	-0.843582	TRUE
OG0002476	-49.1394	104.279	-42.58	97.16	7.11887	TRUE	-1.79984	CONTRACTED	0.0023783	-1.80222	TRUE
OG0002480	-43.8483	93.6965	-34.7139	81.4278	12.2687	TRUE	-0.47212	CONTRACTED	0.0806111	-0.552731	TRUE
OG0002481	-48.6757	103.351	-42.1284	96.2567	7.09467	TRUE	-0.842281	CONTRACTED	0.113852	-0.956133	TRUE
OG0002488	-44.6449	95.2899	-38.1711	88.3421	6.94775	TRUE	-2.28584	CONTRACTED	-0.0209942	-2.26485	TRUE
OG0002492	-47.4945	100.989	-42.0355	96.071	4.91794	TRUE	-1.39334	CONTRACTED	-0.0339575	-1.35938	TRUE
OG0002493	-34.1037	74.2074	-26.7114	65.4228	8.78462	TRUE	-0.412914	CONTRACTED	0.0037505	-0.416664	TRUE
OG0002496	-50.3644	106.729	-43.4876	98.9752	7.75358	TRUE	-0.243771	CONTRACTED	-0.0284279	-0.215343	TRUE
OG0002498	-54.1016	114.203	-49.8002	111.6	2.60287	TRUE	-0.35406	CONTRACTED	0.108786	-0.462846	TRUE
OG0002505	-44.5911	95.1822	-33.5025	79.0049	16.1773	TRUE	-0.711198	CONTRACTED	0	-0.711198	TRUE
OG0002510	-38.6897	83.3795	-34.6823	81.3646	2.0149	TRUE	-0.668011	CONTRACTED	0.156602	-0.824613	TRUE
OG0002511	-39.7678	85.5356	-28.6393	69.2786	16.257	TRUE	-1.23103	CONTRACTED	-0.02377	-1.20726	TRUE
OG0002526	-44.5825	95.1651	-39.5581	91.1162	4.04888	TRUE	-0.0946015	CONTRACTED	-0.0330644	-0.0615371	TRUE
OG0002534	-51.66	109.32	-47.2887	106.577	2.74261	TRUE	-1.52747	CONTRACTED	0.0939218	-1.62139	TRUE
OG0002540	-50.9233	107.847	-38.2155	88.4309	19.4156	TRUE	-2.95275	CONTRACTED	0.123214	-3.07596	TRUE
OG0002544	-47.8157	101.631	-35.4723	82.9445	18.6869	TRUE	-0.381942	CONTRACTED	0.127585	-0.509527	TRUE
OG0002545	-46.5955	99.1911	-39.3081	90.6163	8.57482	TRUE	-0.146293	CONTRACTED	0.0763629	-0.222656	TRUE
OG0002548	-44.0751	94.1502	-29.6547	71.3094	22.8408	TRUE	-0.9685	CONTRACTED	0.110858	-1.07936	TRUE
OG0002549	-42.5667	91.1335	-28.8025	69.6051	21.5284	TRUE	-2.85203	CONTRACTED	0.11941	-2.97144	TRUE
OG0002552	-39.8805	85.761	-34.8214	81.6428	4.11817	TRUE	-0.614033	CONTRACTED	0.0269269	-0.64096	TRUE
OG0002562	-43.1288	92.2575	-38.1573	88.3145	3.94299	TRUE	-1.01593	CONTRACTED	-2.75e-05	-1.0159	TRUE
OG0002565	-49.5737	105.147	-42.6931	97.3862	7.76115	TRUE	-0.953585	CONTRACTED	0.125538	-1.07912	TRUE
OG0002566	-59.7136	125.427	-54.5787	121.157	4.26985	TRUE	-4.1662	CONTRACTED	-0.59359	-3.57261	TRUE
OG0002591	-47.1497	100.299	-41.9559	95.9117	4.38769	TRUE	-1.70526	CONTRACTED	0.0678434	-1.7731	TRUE
OG0002592	-35.1608	76.3216	-29.5165	71.033	5.2886	TRUE	-1.27894	CONTRACTED	0.0850195	-1.36396	TRUE
OG0002607	-35.5491	77.0981	-31.46	74.9199	2.17823	TRUE	-1.26501	CONTRACTED	1.66e-05	-1.26503	TRUE
OG0002628	-54.3082	114.616	-48.7161	109.432	5.18424	TRUE	-2.57718	CONTRACTED	0.0509087	-2.62809	TRUE
OG0002629	-44.5474	95.0947	-31.6646	75.3292	19.7655	TRUE	-0.694056	CONTRACTED	0.0307832	-0.724839	TRUE
OG0002646	-36.5901	79.1802	-27.5161	67.0322	12.1481	TRUE	-1.732	CONTRACTED	0.0347547	-1.76675	TRUE
OG0002658	-33.7208	73.4417	-29.2242	70.4483	2.99335	TRUE	-1.55212	CONTRACTED	-1.7e-06	-1.55212	TRUE
OG0002661	-42.3311	90.6621	-34.8417	81.6835	8.97865	TRUE	-0.681097	CONTRACTED	0.113902	-0.794999	TRUE
OG0002663	-43.6332	93.2665	-36.3667	84.7334	8.53308	TRUE	-1.71892	CONTRACTED	-0.0063099	-1.71261	TRUE
OG0002669	-38.7266	83.4532	-33.255	78.5099	4.94329	TRUE	-2.17643	CONTRACTED	-0.033015	-2.14342	TRUE
OG0002682	-43.2652	92.5304	-36.8838	85.7677	6.76274	TRUE	-1.87407	CONTRACTED	0.0789912	-1.95306	TRUE
OG0002692	-52.1008	110.202	-41.6148	95.2296	14.972	TRUE	-0.159905	CONTRACTED	0.133004	-0.292909	TRUE
OG0002693	-48.3826	102.765	-43.4627	98.9253	3.83979	TRUE	-0.167571	CONTRACTED	0.108885	-0.276456	TRUE
OG0002694	-48.1369	102.274	-39.333	90.666	11.6078	TRUE	-0.995323	CONTRACTED	0.1405	-1.13582	TRUE
OG0002697	-41.9341	89.8682	-37.8378	87.6756	2.19257	TRUE	-1.65649	CONTRACTED	0.0455555	-1.70205	TRUE
OG0002704	-47.3606	100.721	-37.561	87.122	13.5993	TRUE	-0.748266	CONTRACTED	0.106988	-0.855254	TRUE
OG0002719	-34.4829	74.9659	-30.4048	72.8097	2.15619	TRUE	-1.04613	CONTRACTED	0.0973399	-1.14347	TRUE
OG0002726	-48.962	103.924	-43.085	98.1699	5.75408	TRUE	-1.55624	CONTRACTED	0.126396	-1.68264	TRUE
OG0002728	-46.5622	99.1244	-39.7994	91.5988	7.52566	TRUE	-1.44237	CONTRACTED	-0.220421	-1.22195	TRUE
OG0002735	-48.4369	102.874	-40.2749	92.5498	10.3239	TRUE	-1.22346	CONTRACTED	0.156206	-1.37967	TRUE
OG0002756	-41.5402	89.0804	-35.9809	83.9617	5.11868	TRUE	-1.31822	CONTRACTED	0.118048	-1.43627	TRUE
OG0002770	-38.7003	83.4005	-33.5771	79.1542	4.24639	TRUE	-0.350674	CONTRACTED	0.0747746	-0.425449	TRUE
OG0002772	-45.5972	97.1943	-38.4685	88.9371	8.25724	TRUE	-0.822182	CONTRACTED	-0.032959	-0.789223	TRUE
OG0002773	-45.772	97.544	-36.6633	85.3265	12.2175	TRUE	-0.699394	CONTRACTED	0.0820259	-0.78142	TRUE
OG0002780	-50.9238	107.848	-44.1847	100.369	7.47827	TRUE	-3.05687	CONTRACTED	0.105694	-3.16256	TRUE
OG0002792	-49.4153	104.831	-41.9557	95.9114	8.91917	TRUE	-0.0382979	CONTRACTED	0.111409	-0.149707	TRUE
OG0002800	-45.6283	97.2567	-39.2424	90.4848	6.77184	TRUE	-0.797137	CONTRACTED	-0.0001512	-0.796986	TRUE
OG0002810	-46.9826	99.9651	-41.6978	95.3956	4.56954	TRUE	-1.3461	CONTRACTED	0.176461	-1.52256	TRUE
OG0002836	-40.5101	87.0202	-32.274	76.548	10.4722	TRUE	-0.420488	CONTRACTED	0.139086	-0.559574	TRUE
OG0002838	-42.6003	91.2006	-29.7958	71.5916	19.609	TRUE	-1.59834	CONTRACTED	-3e-07	-1.59834	TRUE
OG0002846	-38.7106	83.4211	-33.0388	78.0775	5.3436	TRUE	-0.034657	CONTRACTED	0.0238819	-0.0585389	TRUE
OG0002848	-62.676	131.352	-58.3033	128.607	2.74539	TRUE	-25.8543	CONTRACTED	-3.1517	-22.7026	TRUE
OG0002849	-56.9708	119.942	-52.4389	116.878	3.06383	TRUE	-25.1858	CONTRACTED	-0.729619	-24.4562	TRUE
OG0002861	-48.1517	102.303	-42.736	97.4721	4.83132	TRUE	-0.282147	CONTRACTED	0.123629	-0.405776	TRUE
OG0002869	-48.9281	103.856	-39.6305	91.2611	12.5952	TRUE	-0.66949	CONTRACTED	0.0144168	-0.683907	TRUE
OG0002873	-43.7593	93.5187	-29.7531	71.5061	22.0125	TRUE	-0.455058	CONTRACTED	0.110262	-0.56532	TRUE
OG0002886	-45.2325	96.465	-35.7862	83.5725	12.8926	TRUE	-2.46174	CONTRACTED	0.116606	-2.57835	TRUE
OG0002888	-49.4072	104.814	-36.8737	85.7473	19.0671	TRUE	-1.63345	CONTRACTED	0.0931011	-1.72655	TRUE
OG0002890	-42.2696	90.5391	-31.9942	75.9884	14.5508	TRUE	-3.19182	CONTRACTED	0.135386	-3.32721	TRUE
OG0002898	-40.0482	86.0965	-34.6462	81.2924	4.80407	TRUE	-1.67236	CONTRACTED	0.0925272	-1.76489	TRUE
OG0002905	-54.8727	115.745	-50.7148	113.43	2.31595	TRUE	-2.92471	CONTRACTED	0.0718248	-2.99653	TRUE
OG0002908	-48.7197	103.439	-42.5124	97.0249	6.41461	TRUE	-0.0221544	CONTRACTED	0.0025026	-0.024657	TRUE
OG0002914	-35.582	77.164	-25.2621	62.5242	14.6399	TRUE	-1.14795	CONTRACTED	0.0472317	-1.19518	TRUE
OG0002924	-52.588	111.176	-46.514	105.028	6.14802	TRUE	-0.254418	CONTRACTED	-0.0377378	-0.21668	TRUE
OG0002930	-47.1319	100.264	-41.5853	95.1705	5.09326	TRUE	-2.14441	CONTRACTED	-0.0435621	-2.10085	TRUE
OG0002938	-43.023	92.046	-31.0471	74.0941	17.9519	TRUE	-0.742427	CONTRACTED	1e-07	-0.742427	TRUE
OG0002943	-43.8079	93.6158	-39.2101	90.4203	3.1955	TRUE	-0.0202618	CONTRACTED	0.112801	-0.133063	TRUE
OG0002944	-40.1443	86.2886	-33.0779	78.1558	8.13286	TRUE	-0.931571	CONTRACTED	-0.0461588	-0.885412	TRUE
OG0002959	-50.4651	106.93	-45.8617	103.723	3.20678	TRUE	-0.761176	CONTRACTED	-0.27402	-0.487156	TRUE
OG0002967	-45.3576	96.7152	-40.9487	93.8973	2.81786	TRUE	-0.271348	CONTRACTED	0.0927605	-0.364108	TRUE
OG0002971	-49.9907	105.981	-44.9656	101.931	4.05018	TRUE	-2.06822	CONTRACTED	0.0690493	-2.13727	TRUE
OG0002976	-45.1766	96.3533	-40.3813	92.7626	3.59074	TRUE	-0.522315	CONTRACTED	0.102257	-0.624572	TRUE
OG0002977	-44.2994	94.5988	-38.4076	88.8153	5.78357	TRUE	-0.462598	CONTRACTED	0.105427	-0.568025	TRUE
OG0002990	-51.5451	109.09	-44.9802	101.96	7.12981	TRUE	-0.75409	CONTRACTED	0.145192	-0.899282	TRUE
OG0002991	-40.4773	86.9545	-33.1839	78.3678	8.58674	TRUE	-0.518823	CONTRACTED	0.124836	-0.643659	TRUE
OG0002992	-35.8522	77.7043	-31.5907	75.1814	2.52292	TRUE	-1.90777	CONTRACTED	0.0850027	-1.99277	TRUE
OG0002998	-45.6001	97.2001	-37.9505	87.9011	9.29905	TRUE	-1.17358	CONTRACTED	0.128136	-1.30172	TRUE
OG0003007	-44.6255	95.251	-39.7551	91.5102	3.74079	TRUE	-0.274121	CONTRACTED	-0.0670235	-0.207097	TRUE
OG0003009	-49.2417	104.483	-39.4742	90.9484	13.5351	TRUE	-0.449481	CONTRACTED	0.0900712	-0.539552	TRUE
OG0003031	-49.2051	104.41	-37.3523	86.7047	17.7056	TRUE	-3.63533	CONTRACTED	0.086086	-3.72142	TRUE
OG0003038	-47.9268	101.854	-39.2311	90.4623	11.3913	TRUE	-1.00767	CONTRACTED	0.042739	-1.05041	TRUE
OG0003041	-42.6407	91.2815	-26.8925	65.785	25.4965	TRUE	-0.565307	CONTRACTED	0.0683471	-0.633654	TRUE
OG0003057	-50.3816	106.763	-42.0275	96.055	10.7082	TRUE	-0.82852	CONTRACTED	0.0721298	-0.90065	TRUE
OG0003060	-45.3885	96.777	-40.6956	93.3912	3.38582	TRUE	-0.977538	CONTRACTED	0.130361	-1.1079	TRUE
OG0003065	-39.9304	85.8608	-35.4371	82.8742	2.98666	TRUE	-0.824961	CONTRACTED	0.0317686	-0.85673	TRUE
OG0003070	-40.3426	86.6853	-35.895	83.7899	2.89538	TRUE	-0.756129	CONTRACTED	0.0923733	-0.848502	TRUE
OG0003085	-46.5947	99.1893	-39.0241	90.0483	9.14105	TRUE	-0.469985	CONTRACTED	0.0747876	-0.544773	TRUE
OG0003089	-33.6365	73.273	-26.4359	64.8718	8.40117	TRUE	-0.433595	CONTRACTED	0.079873	-0.513468	TRUE
OG0003105	-41.963	89.926	-31.4322	74.8645	15.0615	TRUE	-1.62206	CONTRACTED	0.0848986	-1.70696	TRUE
OG0003112	-41.3977	88.7955	-29.0525	70.105	18.6905	TRUE	-1.75416	CONTRACTED	0.0915387	-1.8457	TRUE
OG0003113	-35.871	77.7421	-29.8952	71.7905	5.9516	TRUE	-2.2653	CONTRACTED	-0.0012545	-2.26405	TRUE
OG0003116	-40.4066	86.8132	-31.968	75.9361	10.8771	TRUE	-1.35015	CONTRACTED	-0.151385	-1.19876	TRUE
OG0003119	-40.968	87.9359	-29.0042	70.0083	17.9276	TRUE	-0.773701	CONTRACTED	0.0834434	-0.857144	TRUE
OG0003125	-45.778	97.5561	-40.9582	93.9164	3.63966	TRUE	-1.2644	CONTRACTED	0.0494687	-1.31387	TRUE
OG0003127	-35.6613	77.3226	-31.3903	74.7807	2.54193	TRUE	-0.480295	CONTRACTED	0.0655533	-0.545848	TRUE
OG0003132	-47.5482	101.096	-40.6295	93.2589	7.83747	TRUE	-0.790833	CONTRACTED	0.0410565	-0.83189	TRUE
OG0003144	-35.1736	76.3472	-30.7449	73.4897	2.85744	TRUE	-0.664827	CONTRACTED	0.110799	-0.775626	TRUE
OG0003147	-45.1902	96.3804	-38.7111	89.4222	6.95816	TRUE	-0.442798	CONTRACTED	0.0770968	-0.519895	TRUE
OG0003160	-37.7442	81.4884	-32.734	77.468	4.02046	TRUE	-1.58167	CONTRACTED	0.09333	-1.675	TRUE
OG0003171	-37.5978	81.1957	-31.6536	75.3072	5.88851	TRUE	-1.37039	CONTRACTED	0.0085912	-1.37898	TRUE
OG0003180	-39.4671	84.9342	-35.3965	82.793	2.14122	TRUE	-1.68561	CONTRACTED	0.0862096	-1.77182	TRUE
OG0003188	-40.2043	86.4086	-26.1565	64.3129	22.0957	TRUE	-1.24543	CONTRACTED	0.0822395	-1.32767	TRUE
OG0003197	-49.2028	104.406	-41.5631	95.1261	9.27947	TRUE	-0.541986	CONTRACTED	0.0688257	-0.610812	TRUE
OG0003198	-41.9449	89.8897	-35.2694	82.5389	7.35085	TRUE	-1.14502	CONTRACTED	0.059213	-1.20423	TRUE
OG0003219	-45.9479	97.8959	-41.0461	94.0921	3.80373	TRUE	-0.48994	CONTRACTED	-0.052775	-0.437165	TRUE
OG0003225	-48.3456	102.691	-43.9684	99.9369	2.75433	TRUE	-1.32159	CONTRACTED	-0.0623955	-1.25919	TRUE
OG0003226	-35.1631	76.3263	-27.8192	67.6383	8.68793	TRUE	-1.01936	CONTRACTED	0.0694276	-1.08879	TRUE
OG0003239	-36.7015	79.4029	-31.3803	74.7606	4.64237	TRUE	-0.349937	CONTRACTED	0	-0.349937	TRUE
OG0003245	-35.0816	76.1632	-30.1088	72.2177	3.94549	TRUE	-0.739956	CONTRACTED	0.080137	-0.820093	TRUE
OG0003249	-33.2854	72.5709	-29.0048	70.0097	2.56121	TRUE	-1.36448	CONTRACTED	0.130763	-1.49524	TRUE
OG0003254	-37.6138	81.2276	-28.385	68.77	12.4577	TRUE	-1.34808	CONTRACTED	0.103769	-1.45185	TRUE
OG0003257	-42.0149	90.0298	-35.8123	83.6246	6.40515	TRUE	-1.17893	CONTRACTED	-0.0015972	-1.17733	TRUE
OG0003258	-30.411	66.822	-24.3841	60.7682	6.05375	TRUE	-1.56618	CONTRACTED	0.0651224	-1.6313	TRUE
OG0003260	-35.6526	77.3052	-30.3162	72.6325	4.67272	TRUE	-0.127597	CONTRACTED	0.0756259	-0.203223	TRUE
OG0003261	-39.2716	84.5432	-33.8978	79.7957	4.74747	TRUE	-0.0846421	CONTRACTED	0.09051	-0.175152	TRUE
OG0003262	-45.5731	97.1462	-36.9734	85.9469	11.1994	TRUE	-2.56362	CONTRACTED	0.125499	-2.68912	TRUE
OG0003265	-48.6292	103.258	-43.889	99.7781	3.48038	TRUE	-0.254775	CONTRACTED	-0.076339	-0.178436	TRUE
OG0003266	-39.1216	84.2432	-31.074	74.148	10.0952	TRUE	-0.419078	CONTRACTED	-0.0221058	-0.396972	TRUE
OG0003279	-49.2472	104.494	-42.9566	97.9132	6.58112	TRUE	-0.388632	CONTRACTED	-0.0151849	-0.373447	TRUE
OG0003282	-41.4326	88.8653	-31.8089	75.6179	13.2474	TRUE	-0.179523	CONTRACTED	0.0928784	-0.272401	TRUE
OG0003283	-39.2944	84.5887	-31.6063	75.2126	9.37607	TRUE	-0.122774	CONTRACTED	0	-0.122774	TRUE
OG0003287	-26.8738	59.7475	-22.5613	57.1226	2.62496	TRUE	-1.72482	CONTRACTED	0.086167	-1.81099	TRUE
OG0003294	-34.8931	75.7861	-29.0107	70.0215	5.76465	TRUE	-0.298586	CONTRACTED	0.0337102	-0.332296	TRUE
OG0003296	-38.6105	83.221	-34.574	81.148	2.073	TRUE	-0.35428	CONTRACTED	-0.0136834	-0.340597	TRUE
OG0003299	-30.8995	67.7989	-26.0144	64.0288	3.77011	TRUE	-1.06385	CONTRACTED	0.0219356	-1.08579	TRUE
OG0003302	-52.1373	110.275	-48.0489	108.098	2.17679	TRUE	-2.90328	CONTRACTED	0.0769211	-2.9802	TRUE
OG0003303	-28.2241	62.4481	-23.4511	58.9022	3.54587	TRUE	-0.575654	CONTRACTED	0	-0.575654	TRUE
OG0003313	-40.227	86.454	-24.2605	60.521	25.933	TRUE	-0.672373	CONTRACTED	0.0778434	-0.750216	TRUE
OG0003329	-35.0233	76.0467	-29.558	71.1161	4.93056	TRUE	-2.35626	CONTRACTED	0.0381661	-2.39443	TRUE
OG0003342	-25.7546	57.5092	-20.089	52.1781	5.3311	TRUE	-0.135002	CONTRACTED	0.0634152	-0.198417	TRUE
OG0003351	-46.92	99.84	-41.1393	94.2785	5.56154	TRUE	-0.028739	CONTRACTED	-0.0732168	0.0444778	FALSE
OG0003352	-36.0569	78.1137	-30.4928	72.9856	5.12812	TRUE	-0.817107	CONTRACTED	-0.0263888	-0.790718	TRUE
OG0003382	-38.7091	83.4181	-33.4379	78.8759	4.54221	TRUE	-0.0322121	CONTRACTED	0	-0.0322121	TRUE
OG0003386	-42.215	90.4301	-37.9626	87.9252	2.50486	TRUE	-0.100551	CONTRACTED	-0.0633072	-0.0372438	TRUE
OG0003391	-40.1619	86.3237	-33.0036	78.0073	8.31646	TRUE	-1.18773	CONTRACTED	0.0120281	-1.19976	TRUE
OG0003394	-30.0637	66.1274	-24.7845	61.569	4.55837	TRUE	-1.37625	CONTRACTED	-0.0010139	-1.37524	TRUE
OG0003400	-43.7544	93.5088	-38.4615	88.9231	4.58572	TRUE	-1.17068	CONTRACTED	-0.0178616	-1.15282	TRUE
OG0003406	-45.5866	97.1731	-40.5397	93.0794	4.09375	TRUE	-1.54079	CONTRACTED	-0.0526318	-1.48816	TRUE
OG0003415	-41.5838	89.1676	-37.2143	86.4286	2.73895	TRUE	-1.0105	CONTRACTED	0.0614665	-1.07197	TRUE
OG0003424	-39.8895	85.7791	-34.3865	80.7729	5.00613	TRUE	-1.08733	CONTRACTED	0.0675859	-1.15492	TRUE
OG0003430	-34.2151	74.4302	-29.8226	71.6452	2.78503	TRUE	-1.72487	CONTRACTED	0.0002066	-1.72508	TRUE
OG0003433	-49.3068	104.614	-44.958	101.916	2.69765	TRUE	-1.21611	CONTRACTED	-0.108922	-1.10719	TRUE
OG0003447	-41.4874	88.9748	-32.2641	76.5282	12.4465	TRUE	-0.38428	CONTRACTED	0.0435922	-0.427872	TRUE
OG0003451	-34.9184	75.8369	-24.3934	60.7868	15.0501	TRUE	-0.471101	CONTRACTED	0.07536	-0.546461	TRUE
OG0003456	-39.4624	84.9247	-33.4377	78.8754	6.04936	TRUE	-0.818067	CONTRACTED	-0.0534633	-0.764604	TRUE
OG0003457	-43.781	93.5619	-35.4133	82.8266	10.7353	TRUE	-1.52363	CONTRACTED	0.0297942	-1.55342	TRUE
OG0003460	-44.4995	94.999	-36.464	84.928	10.0711	TRUE	-0.321534	CONTRACTED	0.1165	-0.438034	TRUE
OG0003463	-45.3984	96.7968	-35.2876	82.5753	14.2215	TRUE	-1.98414	CONTRACTED	0.0012624	-1.9854	TRUE
OG0003465	-44.577	95.1539	-36.5022	85.0043	10.1496	TRUE	-0.795393	CONTRACTED	0.0976098	-0.893003	TRUE
OG0003488	-42.9406	91.8812	-28.2179	68.4358	23.4454	TRUE	-0.71837	CONTRACTED	0.0151413	-0.733511	TRUE
OG0003490	-40.0795	86.1591	-25.2905	62.581	23.5781	TRUE	-0.234941	CONTRACTED	1.3e-06	-0.234942	TRUE
OG0003502	-32.7874	71.5748	-25.2244	62.4487	9.12606	TRUE	-0.293414	CONTRACTED	-0.0202898	-0.273124	TRUE
OG0003510	-30.4395	66.8791	-23.2997	58.5994	8.27966	TRUE	-0.206378	CONTRACTED	0.0115407	-0.217919	TRUE
OG0003512	-31.3837	68.7674	-22.0413	56.0827	12.6847	TRUE	-0.928352	CONTRACTED	0.0531368	-0.981489	TRUE
OG0003523	-32.2544	70.5088	-27.0518	66.1036	4.40521	TRUE	-0.980203	CONTRACTED	0.093965	-1.07417	TRUE
OG0003524	-50.0659	106.132	-33.9759	79.9517	26.1802	TRUE	-2.4667	CONTRACTED	-0.0011063	-2.46559	TRUE
OG0003527	-37.8656	81.7313	-31.7412	75.4824	6.24887	TRUE	-0.200384	CONTRACTED	0.0763128	-0.276697	TRUE
OG0003533	-33.992	73.984	-26.4476	64.8952	9.08882	TRUE	-0.0624048	CONTRACTED	0.0795233	-0.141928	TRUE
OG0003536	-46.7256	99.4512	-41.9923	95.9846	3.46659	TRUE	-0.81711	CONTRACTED	0.0464405	-0.86355	TRUE
OG0003540	-22.5646	51.1291	-16.1351	44.2701	6.85904	TRUE	-0.725961	CONTRACTED	1e-07	-0.725961	TRUE
OG0003555	-40.7402	87.4805	-31.2283	74.4566	13.0239	TRUE	-0.233412	CONTRACTED	0.0562538	-0.289666	TRUE
OG0003557	-41.6259	89.2518	-34.1831	80.3663	8.88547	TRUE	-1.44956	CONTRACTED	-0.0251799	-1.42438	TRUE
OG0003564	-39.3815	84.763	-34.3239	80.6477	4.11526	TRUE	-0.376764	CONTRACTED	-0.0209476	-0.355816	TRUE
OG0003578	-33.4454	72.8909	-25.3906	62.7812	10.1097	TRUE	-0.158794	CONTRACTED	0.0426088	-0.201403	TRUE
OG0003580	-33.3747	72.7494	-27.9804	67.9609	4.78856	TRUE	-1.07778	CONTRACTED	0.0965637	-1.17434	TRUE
OG0003595	-37.2055	80.411	-28.4609	68.9217	11.4893	TRUE	-2.59076	CONTRACTED	0.0400249	-2.63078	TRUE
OG0003605	-31.3937	68.7874	-26.9763	65.9527	2.83472	TRUE	-0.879949	CONTRACTED	0.0646488	-0.944598	TRUE
OG0003615	-42.5507	91.1015	-37.042	86.0841	5.01737	TRUE	-1.33351	CONTRACTED	-0.0267089	-1.3068	TRUE
OG0003616	-34.2998	74.5997	-27.9326	67.8651	6.73455	TRUE	-0.19204	CONTRACTED	0.0649904	-0.25703	TRUE
OG0003619	-47.6393	101.279	-40.6601	93.3203	7.95826	TRUE	-0.569623	CONTRACTED	0.0627898	-0.632413	TRUE
OG0003626	-48.11	102.22	-42.7198	97.4397	4.78026	TRUE	-0.742994	CONTRACTED	0.107719	-0.850713	TRUE
OG0003632	-41.5412	89.0824	-32.745	77.4899	11.5925	TRUE	-1.58585	CONTRACTED	0.0835106	-1.66936	TRUE
OG0003638	-45.498	96.996	-33.8193	79.6386	17.3574	TRUE	-0.538172	CONTRACTED	0.0477808	-0.585953	TRUE
OG0003643	-46.6948	99.3896	-40.34	92.6801	6.70953	TRUE	-0.310854	CONTRACTED	0.0048232	-0.315677	TRUE
OG0003648	-49.7937	105.587	-44.1886	100.377	5.21013	TRUE	-0.0828753	CONTRACTED	0.0175502	-0.100426	TRUE
OG0003661	-40.8376	87.6753	-34.7758	81.5517	6.12361	TRUE	-0.859734	CONTRACTED	-0.0406445	-0.81909	TRUE
OG0003672	-27.1594	60.3188	-22.0831	56.1662	4.15256	TRUE	-0.341224	CONTRACTED	0.0772726	-0.418497	TRUE
OG0003679	-37.7973	81.5947	-32.1874	76.3747	5.21992	TRUE	-2.05668	CONTRACTED	0.101637	-2.15832	TRUE
OG0003681	-41.2154	88.4308	-32.2159	76.4318	11.999	TRUE	-1.08514	CONTRACTED	-0.0220681	-1.06307	TRUE
OG0003695	-31.8615	69.7231	-22.7324	57.4649	12.2582	TRUE	-0.229242	CONTRACTED	0.0155515	-0.244793	TRUE
OG0003703	-41.2214	88.4427	-33.6764	79.3527	9.09002	TRUE	-0.543351	CONTRACTED	-0.0388745	-0.504476	TRUE
OG0003705	-52.3226	110.645	-45.7507	103.501	7.14373	TRUE	-58.2609	CONTRACTED	-52.2141	-6.0468	TRUE
OG0003711	-31.0395	68.0791	-23.5044	59.0088	9.07034	TRUE	-0.749972	CONTRACTED	0.0758224	-0.825794	TRUE
OG0003714	-42.996	91.992	-35.9396	83.8791	8.11287	TRUE	-0.195916	CONTRACTED	-0.0414802	-0.154436	TRUE
OG0003720	-40.1762	86.3525	-27.0733	66.1467	20.2058	TRUE	-0.730569	CONTRACTED	0.0884483	-0.819017	TRUE
OG0003732	-42.1909	90.3819	-34.0293	80.0586	10.3232	TRUE	-0.948174	CONTRACTED	-0.0220215	-0.926152	TRUE
OG0003744	-45.5438	97.0876	-39.1178	90.2356	6.85206	TRUE	-1.19214	CONTRACTED	0.106397	-1.29854	TRUE
OG0003746	-28.2937	62.5874	-23.6946	59.3891	3.19829	TRUE	-1.01778	CONTRACTED	-0.0210324	-0.996748	TRUE
OG0003761	-32.4287	70.8574	-26.7751	65.5502	5.30716	TRUE	-0.297004	CONTRACTED	-0.0209452	-0.276059	TRUE
OG0003764	-35.4386	76.8773	-30.3451	72.6903	4.18703	TRUE	-1.64586	CONTRACTED	0.0761744	-1.72203	TRUE
OG0003769	-48.4269	102.854	-43.0015	98.003	4.85075	TRUE	-1.23051	CONTRACTED	0.0477492	-1.27826	TRUE
OG0003774	-44.9241	95.8482	-34.831	81.6619	14.1863	TRUE	-0.959135	CONTRACTED	0.004295	-0.96343	TRUE
OG0003775	-39.2965	84.593	-34.9936	81.9872	2.60585	TRUE	-1.1348	CONTRACTED	-0.0238287	-1.11097	TRUE
OG0003779	-39.953	85.9059	-31.2899	74.5799	11.326	TRUE	-0.683061	CONTRACTED	-5e-06	-0.683056	TRUE
OG0003781	-41.3263	88.6527	-36.0494	84.0988	4.55388	TRUE	-0.590696	CONTRACTED	-0.0425733	-0.548123	TRUE
OG0003783	-40.5682	87.1363	-36.3979	84.7958	2.34051	TRUE	-1.22752	CONTRACTED	-0.0421949	-1.18533	TRUE
OG0003794	-28.6903	63.3805	-20.942	53.8841	9.49645	TRUE	-0.545871	CONTRACTED	0	-0.545871	TRUE
OG0003802	-40.2463	86.4926	-33.253	78.5059	7.98668	TRUE	-0.289846	CONTRACTED	0.0867635	-0.376609	TRUE
OG0003815	-25.1903	56.3805	-21.0279	54.0557	2.3248	TRUE	-2.11172	CONTRACTED	0.0293294	-2.14105	TRUE
OG0003819	-42.8432	91.6864	-33.009	78.0179	13.6685	TRUE	-0.381045	CONTRACTED	0.0945616	-0.475607	TRUE
OG0003823	-33.5564	73.1127	-25.5008	63.0015	10.1112	TRUE	-1.41351	CONTRACTED	-0.0197382	-1.39377	TRUE
OG0003829	-43.5023	93.0046	-39.0457	90.0914	2.91325	TRUE	-3.68659	CONTRACTED	-0.068278	-3.61831	TRUE
OG0003834	-43.0303	92.0606	-37.4307	86.8613	5.19927	TRUE	-0.755216	CONTRACTED	0.0916097	-0.846826	TRUE
OG0003857	-39.2946	84.5892	-33.3266	78.6533	5.93592	TRUE	-1.0174	CONTRACTED	0.0639955	-1.0814	TRUE
OG0003862	-32.7018	71.4036	-25.3029	62.6059	8.79771	TRUE	-0.530388	CONTRACTED	-0.0245661	-0.505822	TRUE
OG0003864	-34.7227	75.4454	-29.805	71.61	3.83545	TRUE	-1.78608	CONTRACTED	0.0676817	-1.85376	TRUE
OG0003873	-32.7376	71.4752	-27.8253	67.6505	3.82466	TRUE	-1.51961	CONTRACTED	0.0217473	-1.54136	TRUE
OG0003879	-23.6751	53.3503	-18.1967	48.3934	4.95692	TRUE	-0.8024	CONTRACTED	0.0476257	-0.850026	TRUE
OG0003880	-34.192	74.384	-28.399	68.7979	5.58611	TRUE	-0.0525568	CONTRACTED	-0.021631	-0.0309258	TRUE
OG0003887	-28.4345	62.8691	-22.7649	57.5298	5.33924	TRUE	-2.15241	CONTRACTED	0.0460518	-2.19846	TRUE
OG0003889	-26.3906	58.7813	-21.2487	54.4975	4.28385	TRUE	-1.04143	CONTRACTED	0.0765538	-1.11798	TRUE
OG0003891	-43.0965	92.1931	-33.6754	79.3508	12.8422	TRUE	-0.15716	CONTRACTED	0.0636231	-0.220783	TRUE
OG0003911	-43.2424	92.4848	-35.0384	82.0769	10.4079	TRUE	-0.681025	CONTRACTED	-0.0404944	-0.640531	TRUE
OG0003913	-29.9871	65.9742	-25.8419	63.6838	2.29039	TRUE	-0.751913	CONTRACTED	0.0487638	-0.800677	TRUE
OG0003925	-34.1739	74.3478	-29.6187	71.2374	3.11048	TRUE	-1.02573	CONTRACTED	0.0946228	-1.12035	TRUE
OG0003929	-25.8502	57.7004	-20.4874	52.9748	4.72563	TRUE	-0.673469	CONTRACTED	0	-0.673469	TRUE
OG0003935	-28.0607	62.1214	-23.4108	58.8215	3.29984	TRUE	-0.621351	CONTRACTED	-0.0403868	-0.580964	TRUE
OG0003940	-40.4978	86.9957	-34.6823	81.3647	5.631	TRUE	-1.92094	CONTRACTED	-0.0046142	-1.91633	TRUE
OG0003959	-48.868	103.736	-44.407	100.814	2.92207	TRUE	-0.421432	CONTRACTED	0.0780389	-0.499471	TRUE
OG0003979	-32.5515	71.1031	-27.2038	66.4076	4.69543	TRUE	-0.338545	CONTRACTED	0.0217252	-0.36027	TRUE
OG0003988	-39.2495	84.499	-29.1448	70.2897	14.2093	TRUE	-0.169772	CONTRACTED	-0.0439046	-0.125867	TRUE
OG0003997	-24.2803	54.5605	-18.9415	49.8829	4.67762	TRUE	-0.776418	CONTRACTED	-4.87e-05	-0.776369	TRUE
OG0004003	-39.9591	85.9182	-32.1778	76.3555	9.56269	TRUE	-1.07846	CONTRACTED	-0.0538194	-1.02464	TRUE
OG0004008	-47.0526	100.105	-42.1336	96.2671	3.83798	TRUE	-0.691251	CONTRACTED	-0.071911	-0.61934	TRUE
OG0004010	-44.1445	94.289	-35.2641	82.5281	11.7608	TRUE	-0.870671	CONTRACTED	0.0612961	-0.931967	TRUE
OG0004014	-39.5512	85.1025	-34.2916	80.5832	4.51931	TRUE	-0.43644	CONTRACTED	0.032249	-0.468689	TRUE
OG0004015	-48.052	102.104	-43.6065	99.2131	2.89084	TRUE	-1.01377	CONTRACTED	-0.0798966	-0.933873	TRUE
OG0004031	-41.6991	89.3982	-30.991	73.982	15.4162	TRUE	-0.428187	CONTRACTED	0.0773065	-0.505494	TRUE
OG0004037	-48.2167	102.433	-42.1301	96.2601	6.17321	TRUE	-0.680495	CONTRACTED	0.0899382	-0.770433	TRUE
OG0004041	-32.2931	70.5862	-17.8558	47.7115	22.8747	TRUE	-0.153198	CONTRACTED	-0.0173583	-0.13584	TRUE
OG0004043	-36.7741	79.5482	-32.6845	77.369	2.17918	TRUE	-0.78057	CONTRACTED	0.0657539	-0.846324	TRUE
OG0004051	-24.6187	55.2375	-19.0406	50.0812	5.1563	TRUE	-0.435712	CONTRACTED	0.0612499	-0.496962	TRUE
OG0004052	-23.0961	52.1921	-17.7442	47.4883	4.70383	TRUE	-0.897013	CONTRACTED	0	-0.897013	TRUE
OG0004066	-37.5918	81.1836	-33.0381	78.0761	3.10747	TRUE	-1.3954	CONTRACTED	0.0186247	-1.41402	TRUE
OG0004067	-35.897	77.794	-30.7464	73.4929	4.30116	TRUE	-0.0818317	CONTRACTED	-0.0451512	-0.0366805	TRUE
OG0004070	-46.9387	99.8773	-39.7639	91.5278	8.34952	TRUE	-0.914901	CONTRACTED	0.0783808	-0.993282	TRUE
OG0004078	-36.3885	78.777	-22.7759	57.5519	21.2251	TRUE	-1.48698	CONTRACTED	-0.0205795	-1.4664	TRUE
OG0004080	-37.8673	81.7346	-30.9577	73.9154	7.81918	TRUE	-1.31998	CONTRACTED	0.06072	-1.3807	TRUE
OG0004082	-42.7769	91.5537	-36.2206	84.4411	7.11263	TRUE	-0.306216	CONTRACTED	-0.0062138	-0.300002	TRUE
OG0004087	-39.3022	84.6044	-30.8862	73.7725	10.8319	TRUE	-1.71108	CONTRACTED	0.0267856	-1.73787	TRUE
OG0004097	-47.3304	100.661	-41.8841	95.7682	4.89255	TRUE	-0.0256476	CONTRACTED	-0.0754933	0.0498457	FALSE
OG0004098	-37.9908	81.9815	-32.3882	76.7764	5.2052	TRUE	-0.0409611	CONTRACTED	-0.0447626	0.0038015	FALSE
OG0004118	-43.5654	93.1308	-34.6408	81.2816	11.8492	TRUE	-0.1679	CONTRACTED	0.0973924	-0.265292	TRUE
OG0004124	-35.7332	77.4664	-29.8185	71.637	5.82947	TRUE	-0.76872	CONTRACTED	-0.0219142	-0.746806	TRUE
OG0004128	-36.9607	79.9213	-26.4614	64.9228	14.9985	TRUE	-0.026743	CONTRACTED	0.0001176	-0.0268606	TRUE
OG0004133	-37.5157	81.0313	-26.5286	65.0573	15.974	TRUE	-1.42085	CONTRACTED	-0.0207513	-1.4001	TRUE
OG0004136	-41.8541	89.7082	-37.24	86.48	3.22818	TRUE	-0.494281	CONTRACTED	0.0070349	-0.501316	TRUE
OG0004148	-47.1052	100.21	-41.9035	95.8069	4.40343	TRUE	-1.50724	CONTRACTED	0.0861441	-1.59338	TRUE
OG0004151	-42.418	90.8359	-32.0011	76.0022	14.8337	TRUE	-3.13175	CONTRACTED	0.0476504	-3.1794	TRUE
OG0004165	-27.7337	61.4675	-22.1993	56.3985	5.06893	TRUE	-2.26554	CONTRACTED	-0.0216234	-2.24392	TRUE
OG0004181	-25.6343	57.2686	-18.0131	48.0262	9.24241	TRUE	-0.207186	CONTRACTED	2e-07	-0.207186	TRUE
OG0004184	-36.6226	79.2451	-31.555	75.11	4.13508	TRUE	-0.905712	CONTRACTED	-0.0465369	-0.859175	TRUE
OG0004190	-38.1522	82.3044	-33.2128	78.4256	3.87881	TRUE	-1.35391	CONTRACTED	0.0670235	-1.42093	TRUE
OG0004191	-25.0633	56.1266	-19.7467	51.4935	4.63314	TRUE	-0.617291	CONTRACTED	2.61e-05	-0.617317	TRUE
OG0004206	-42.4662	90.9325	-22.2435	56.4869	34.4456	TRUE	-0.163837	CONTRACTED	0	-0.163837	TRUE
OG0004211	-33.3087	72.6174	-29.1082	70.2164	2.40102	TRUE	-1.26858	CONTRACTED	0.0826058	-1.35119	TRUE
OG0004212	-32.4641	70.9282	-27.0555	66.1111	4.81709	TRUE	-1.11832	CONTRACTED	0.0132262	-1.13155	TRUE
OG0004227	-30.3485	66.697	-26.3049	64.6098	2.08724	TRUE	-0.94319	CONTRACTED	0.0490735	-0.992263	TRUE
OG0004240	-42.5298	91.0596	-37.6863	87.3726	3.68698	TRUE	-0.141603	CONTRACTED	-0.0298396	-0.111763	TRUE
OG0004254	-41.1148	88.2296	-28.9687	69.9373	18.2923	TRUE	-1.24429	CONTRACTED	-0.027557	-1.21673	TRUE
OG0004255	-27.9536	61.9072	-21.6494	55.2988	6.60836	TRUE	-0.951273	CONTRACTED	0	-0.951273	TRUE
OG0004258	-35.2512	76.5024	-31.1835	74.367	2.13544	TRUE	-1.32149	CONTRACTED	-0.0573285	-1.26416	TRUE
OG0004285	-32.5074	71.0148	-23.8501	59.7002	11.3146	TRUE	-1.37658	CONTRACTED	-0.0196904	-1.35689	TRUE
OG0004287	-40.72	87.44	-35.0406	82.0811	5.35891	TRUE	-0.165064	CONTRACTED	-0.0241436	-0.14092	TRUE
OG0004289	-28.79	63.5801	-22.7299	57.4597	6.12033	TRUE	-0.901216	CONTRACTED	0.0527572	-0.953973	TRUE
OG0004313	-26.9671	59.9342	-21.073	54.1459	5.78828	TRUE	-0.270202	CONTRACTED	-0.0197253	-0.250477	TRUE
OG0004319	-36.3467	78.6933	-31.2036	74.4071	4.28619	TRUE	-1.95843	CONTRACTED	0.0729465	-2.03138	TRUE
OG0004330	-38.2519	82.5038	-33.999	79.998	2.50577	TRUE	-0.863911	CONTRACTED	0.0505788	-0.91449	TRUE
OG0004341	-26.3283	58.6567	-17.2387	46.4774	12.1792	TRUE	-0.302164	CONTRACTED	0.0325613	-0.334725	TRUE
OG0004344	-27.4826	60.9651	-23.4265	58.853	2.1121	TRUE	-1.27212	CONTRACTED	-0.021949	-1.25017	TRUE
OG0004352	-40.875	87.75	-35.0223	82.0446	5.70545	TRUE	-1.19842	CONTRACTED	-0.0027958	-1.19562	TRUE
OG0004370	-35.3227	76.6454	-30.9395	73.879	2.76649	TRUE	-1.66472	CONTRACTED	0.0725751	-1.7373	TRUE
OG0004378	-44.3377	94.6755	-35.5006	83.0012	11.6742	TRUE	-0.933542	CONTRACTED	-0.0457415	-0.8878	TRUE
OG0004384	-28.8342	63.6683	-21.5807	55.1613	8.50697	TRUE	-1e-07	CONTRACTED	-0.0195973	0.0195972	FALSE
OG0004392	-44.6821	95.3641	-40.0712	92.1423	3.22177	TRUE	-0.627379	CONTRACTED	-0.0783187	-0.54906	TRUE
OG0004394	-42.8645	91.729	-27.2808	66.5616	25.1675	TRUE	-1.87712	CONTRACTED	0.0619853	-1.93911	TRUE
OG0004395	-29.5942	65.1883	-22.9069	57.8138	7.37454	TRUE	-3.64475	CONTRACTED	0.0889601	-3.73371	TRUE
OG0004405	-36.62	79.2401	-27.4137	66.8274	12.4127	TRUE	-0.897646	CONTRACTED	-0.015387	-0.882259	TRUE
OG0004408	-37.2187	80.4375	-29.8484	71.6968	8.7407	TRUE	-1.68924	CONTRACTED	-0.0732691	-1.61597	TRUE
OG0004412	-31.9647	69.9293	-24.9424	61.8847	8.04461	TRUE	-0.54955	CONTRACTED	0.0540338	-0.603584	TRUE
OG0004413	-40.3364	86.6728	-33.0594	78.1189	8.55391	TRUE	-1.4703	CONTRACTED	0.0672743	-1.53757	TRUE
OG0004422	-26.824	59.6479	-19.1074	50.2148	9.43314	TRUE	-0.845537	CONTRACTED	0.0370188	-0.882556	TRUE
OG0004431	-32.2799	70.5599	-26.9407	65.8813	4.67853	TRUE	-1.40341	CONTRACTED	-0.0209441	-1.38247	TRUE
OG0004435	-36.283	78.566	-26.0851	64.1703	14.3957	TRUE	-0.546593	CONTRACTED	-0.0424726	-0.50412	TRUE
OG0004441	-40.4617	86.9235	-33.1988	78.3975	8.52596	TRUE	-0.83201	CONTRACTED	0.0619052	-0.893915	TRUE
OG0004456	-34.4536	74.9071	-27.031	66.062	8.84517	TRUE	-1.85641	CONTRACTED	-0.0201428	-1.83627	TRUE
OG0004461	-39.9203	85.8406	-31.5393	75.0785	10.762	TRUE	-0.527359	CONTRACTED	0.0458753	-0.573234	TRUE
OG0004464	-32.8524	71.7047	-25.3519	62.7039	9.00083	TRUE	-0.490332	CONTRACTED	-0.020485	-0.469847	TRUE
OG0004466	-37.2276	80.4552	-31.293	74.5859	5.86931	TRUE	-0.475189	CONTRACTED	0.0621717	-0.537361	TRUE
OG0004468	-36.842	79.684	-32.4023	76.8046	2.87935	TRUE	-1.74556	CONTRACTED	-0.0874308	-1.65813	TRUE
OG0004482	-34.085	74.1701	-29.0598	70.1195	4.05056	TRUE	-1.54618	CONTRACTED	-0.0403765	-1.5058	TRUE
OG0004486	-27.1987	60.3973	-19.2666	50.5332	9.8641	TRUE	-0.740474	CONTRACTED	0.0480249	-0.788499	TRUE
OG0004493	-42.9276	91.8551	-35.319	82.6381	9.21708	TRUE	-1.87609	CONTRACTED	0.0390895	-1.91518	TRUE
OG0004502	-37.9481	81.8962	-24.219	60.438	21.4582	TRUE	-0.492227	CONTRACTED	0.0787718	-0.570999	TRUE
OG0004508	-43.4384	92.8769	-38.2233	88.4467	4.4302	TRUE	-0.829345	CONTRACTED	-0.0374577	-0.791887	TRUE
OG0004571	-35.7039	77.4077	-29.4695	70.9389	6.46878	TRUE	-2.51624	CONTRACTED	0.0143636	-2.5306	TRUE
OG0004576	-29.2969	64.5938	-23.9635	59.927	4.66678	TRUE	-1.04001	CONTRACTED	0.027212	-1.06722	TRUE
OG0004591	-30.4473	66.8946	-24.6725	61.345	5.54959	TRUE	-2.19779	CONTRACTED	-0.0207838	-2.17701	TRUE
OG0004597	-42.7122	91.4244	-31.9481	75.8961	15.5282	TRUE	-1.56354	CONTRACTED	-0.008865	-1.55468	TRUE
OG0004613	-32.1467	70.2935	-26.2746	64.5492	5.74428	TRUE	-0.16203	CONTRACTED	-0.039673	-0.122357	TRUE
OG0004620	-37.97	81.9401	-23.154	58.308	23.6321	TRUE	-1.05847	CONTRACTED	-0.0174841	-1.04099	TRUE
OG0004622	-30.3635	66.7269	-25.8317	63.6634	3.06352	TRUE	-1.02819	CONTRACTED	-0.0201948	-1.008	TRUE
OG0004629	-36.4764	78.9528	-24.4289	60.8578	18.0949	TRUE	-1.47965	CONTRACTED	-0.0395	-1.44015	TRUE
OG0004633	-24.7693	55.5386	-20.6548	53.3096	2.229	TRUE	-0.729296	CONTRACTED	-0.0198293	-0.709467	TRUE
OG0004635	-34.6657	75.3314	-29.0896	70.1793	5.1521	TRUE	-0.489549	CONTRACTED	0.0055615	-0.495111	TRUE
OG0004640	-35.8413	77.6826	-25.4385	62.8769	14.8057	TRUE	-0.780026	CONTRACTED	-0.0422939	-0.737732	TRUE
OG0004641	-24.5401	55.0802	-20.29	52.5799	2.50022	TRUE	-0.513824	CONTRACTED	0.0328761	-0.5467	TRUE
OG0004665	-43.4079	92.8159	-39.2239	90.4478	2.36804	TRUE	-1.51347	CONTRACTED	-0.122985	-1.39049	TRUE
OG0004666	-26.5524	59.1048	-19.946	51.8921	7.21273	TRUE	-0.557909	CONTRACTED	0.0637969	-0.621706	TRUE
OG0004699	-24.1971	54.3942	-20.058	52.1161	2.27815	TRUE	-0.695626	CONTRACTED	-0.0197555	-0.67587	TRUE
OG0004701	-34.6893	75.3785	-23.0472	58.0944	17.2841	TRUE	-0.510892	CONTRACTED	0.0491165	-0.560009	TRUE
OG0004703	-26.8062	59.6123	-21.2261	54.4522	5.16015	TRUE	-1.39573	CONTRACTED	0.0667746	-1.4625	TRUE
OG0004713	-36.1981	78.3961	-29.8659	71.7317	6.66437	TRUE	-1.36518	CONTRACTED	0.0051576	-1.37034	TRUE
OG0004721	-20.207	46.4141	-13.9231	39.8462	6.56788	TRUE	-0.80896	CONTRACTED	0	-0.80896	TRUE
OG0004725	-44.0159	94.0318	-38.798	89.596	4.43584	TRUE	-0.390264	CONTRACTED	-0.0488081	-0.341456	TRUE
OG0004727	-40.487	86.974	-35.3336	82.6672	4.30676	TRUE	-0.302089	CONTRACTED	0.0140563	-0.316145	TRUE
OG0004732	-40.8345	87.669	-30.228	72.4559	15.213	TRUE	-0.951344	CONTRACTED	-0.0451767	-0.906167	TRUE
OG0004738	-22.2132	50.4264	-16.498	44.9961	5.43031	TRUE	-0.811246	CONTRACTED	0	-0.811246	TRUE
OG0004747	-29.4231	64.8462	-25.2994	62.5988	2.24747	TRUE	-1.04509	CONTRACTED	0.0331279	-1.07822	TRUE
OG0004760	-31.725	69.4501	-22.0287	56.0574	13.3927	TRUE	-1.34729	CONTRACTED	0.0479835	-1.39527	TRUE
OG0004762	-27.0925	60.185	-21.0765	54.153	6.03198	TRUE	-0.750465	CONTRACTED	-0.0189826	-0.731482	TRUE
OG0004793	-37.2503	80.5007	-32.3283	76.6566	3.84405	TRUE	-0.867163	CONTRACTED	0.0625845	-0.929748	TRUE
OG0004796	-50.7396	107.479	-45.1605	102.321	5.15815	TRUE	-0.343004	CONTRACTED	0.0430384	-0.386042	TRUE
OG0004817	-28.2211	62.4421	-18.8176	49.6353	12.8068	TRUE	-0.537194	CONTRACTED	0.0451486	-0.582343	TRUE
OG0004824	-28.5718	63.1436	-21.2202	54.4405	8.70309	TRUE	-0.0143413	CONTRACTED	-0.0189174	0.0045761	FALSE
OG0004829	-43.2023	92.4047	-34.2367	80.4734	11.9313	TRUE	-3.10182	CONTRACTED	-0.0448065	-3.05701	TRUE
OG0004851	-21.0948	48.1897	-14.457	40.914	7.27569	TRUE	-0.507307	CONTRACTED	0.0056956	-0.513003	TRUE
OG0004870	-24.9515	55.9031	-15.2299	42.4599	13.4432	TRUE	-0.894971	CONTRACTED	0.0181464	-0.913117	TRUE
OG0004871	-37.5634	81.1268	-31.7412	75.4825	5.6443	TRUE	-1.38458	CONTRACTED	0.0237762	-1.40836	TRUE
OG0004875	-34.4869	74.9738	-24.4873	60.9746	13.9992	TRUE	-1.98605	CONTRACTED	-0.0192446	-1.96681	TRUE
OG0004877	-34.284	74.5681	-29.1445	70.289	4.27903	TRUE	-1.0348	CONTRACTED	0.0633341	-1.09813	TRUE
OG0004881	-26.6639	59.3279	-22.4627	56.9254	2.40254	TRUE	-0.23302	CONTRACTED	-0.0192164	-0.213804	TRUE
OG0004897	-44.3951	94.7902	-40.3011	92.6023	2.1879	TRUE	-0.699629	CONTRACTED	-0.0821491	-0.61748	TRUE
OG0004902	-43.433	92.8661	-38.7746	89.5492	3.3169	TRUE	-0.521038	CONTRACTED	-0.0991848	-0.421853	TRUE
OG0004913	-45.1919	96.3838	-40.1214	92.2428	4.14101	TRUE	-1.19016	CONTRACTED	-0.0717655	-1.11839	TRUE
OG0004918	-33.4136	72.8272	-23.3086	58.6172	14.21	TRUE	-1.5233	CONTRACTED	-0.0162712	-1.50703	TRUE
OG0004926	-29.9508	65.9016	-23.4688	58.9375	6.96402	TRUE	-0.383209	CONTRACTED	-0.0383094	-0.3449	TRUE
OG0004928	-39.326	84.6521	-34.2874	80.5748	4.07721	TRUE	-0.0880211	CONTRACTED	0.0057548	-0.0937759	TRUE
OG0004941	-26.9723	59.9446	-21.9968	55.9936	3.95099	TRUE	-1.27962	CONTRACTED	-0.0192249	-1.2604	TRUE
OG0004948	-18.7058	43.4115	-10.6898	33.3795	10.032	TRUE	-0.355878	CONTRACTED	8.3e-06	-0.355886	TRUE
OG0004952	-38.0133	82.0267	-33.5242	79.0485	2.97821	TRUE	-0.185181	CONTRACTED	-0.0876324	-0.0975486	TRUE
OG0004973	-35.0684	76.1368	-26.4605	64.9209	11.2159	TRUE	-0.648171	CONTRACTED	-0.0173362	-0.630835	TRUE
OG0004976	-24.0173	54.0346	-17.227	46.454	7.58059	TRUE	-0.867882	CONTRACTED	0.0575333	-0.925415	TRUE
OG0004994	-36.1366	78.2732	-29.6628	71.3257	6.9475	TRUE	-0.25588	CONTRACTED	-0.0370797	-0.2188	TRUE
OG0005004	-43.9601	93.9203	-37.9828	87.9656	5.95467	TRUE	-0.781189	CONTRACTED	-0.0930844	-0.688105	TRUE
OG0005010	-22.3664	50.7328	-14.6749	41.3498	9.383	TRUE	-0.775941	CONTRACTED	2e-06	-0.775943	TRUE
OG0005011	-17.4681	40.9362	-10.9079	33.8157	7.12043	TRUE	-0.749974	CONTRACTED	0.0163773	-0.766351	TRUE
OG0005029	-10.3525	26.705	-6.262	24.524	2.18096	TRUE	-1.45474	CONTRACTED	0	-1.45474	TRUE
OG0005030	-41.0743	88.1487	-33.1293	78.2586	9.89003	TRUE	-0.74801	CONTRACTED	0.048539	-0.796549	TRUE
OG0005047	-44.5959	95.1918	-37.7652	87.5304	7.66135	TRUE	-2.311	CONTRACTED	-0.0739764	-2.23702	TRUE
OG0005074	-31.869	69.7379	-27.6974	67.3947	2.34321	TRUE	-0.592784	CONTRACTED	-0.0408492	-0.551935	TRUE
OG0005096	-37.7787	81.5573	-23.8454	59.6908	21.8666	TRUE	-0.599442	CONTRACTED	-0.0200534	-0.579389	TRUE
OG0005108	-27.8036	61.6073	-23.1974	58.3947	3.21257	TRUE	-1.45053	CONTRACTED	-0.0188364	-1.43169	TRUE
OG0005110	-17.421	40.8421	-10.814	33.628	7.21408	TRUE	-0.639502	CONTRACTED	1.03e-05	-0.639512	TRUE
OG0005115	-21.3581	48.7162	-16.2964	44.5928	4.1233	TRUE	-0.718533	CONTRACTED	-0.0183966	-0.700136	TRUE
OG0005141	-25.1643	56.3287	-20.8649	53.7299	2.59878	TRUE	-0.557898	CONTRACTED	-0.019481	-0.538417	TRUE
OG0005154	-29.5165	65.033	-22.9196	57.8392	7.19378	TRUE	-1.52233	CONTRACTED	-0.012874	-1.50946	TRUE
OG0005173	-38.3778	82.7555	-33.2462	78.4923	4.2632	TRUE	-1.00557	CONTRACTED	-0.0653413	-0.940229	TRUE
OG0005211	-20.2705	46.541	-13.9255	39.8509	6.69004	TRUE	-0.79508	CONTRACTED	-2.9e-05	-0.795051	TRUE
OG0005230	-31.3316	68.6632	-27.2654	66.5308	2.13239	TRUE	-0.827772	CONTRACTED	-0.0403283	-0.787444	TRUE
OG0005241	-33.1695	72.339	-27.2834	66.5668	5.77223	TRUE	-1.30888	CONTRACTED	-0.0418986	-1.26698	TRUE
OG0005261	-27.4585	60.9171	-19.8719	51.7438	9.17328	TRUE	-1.85728	CONTRACTED	-0.0059783	-1.8513	TRUE
OG0005264	-26.3292	58.6583	-19.6683	51.3366	7.32172	TRUE	-0.697562	CONTRACTED	2.2e-06	-0.697564	TRUE
OG0005274	-26.7038	59.4076	-18.366	48.7321	10.6755	TRUE	-0.134563	CONTRACTED	-0.0180256	-0.116537	TRUE
OG0005284	-34.9509	75.9017	-30.3655	72.7311	3.17063	TRUE	-2.2869	CONTRACTED	-0.046545	-2.24036	TRUE
OG0005286	-38.4679	82.9359	-31.3864	74.7728	8.16309	TRUE	-0.963088	CONTRACTED	-0.0643536	-0.898734	TRUE
OG0005313	-20.7913	47.5825	-15.3493	42.6986	4.88393	TRUE	-0.421344	CONTRACTED	-0.0144292	-0.406915	TRUE
OG0005317	-35.9254	77.8509	-31.4784	74.9568	2.89413	TRUE	-0.11058	CONTRACTED	-0.0862601	-0.0243199	TRUE
OG0005322	-48.5655	103.131	-43.8913	99.7825	3.34856	TRUE	-0.335057	CONTRACTED	-0.123275	-0.211782	TRUE
OG0005325	-23.9439	53.8878	-13.7401	39.4801	14.4077	TRUE	-0.238057	CONTRACTED	0.0161794	-0.254236	TRUE
OG0005336	-24.6556	55.3112	-17.6278	47.2556	8.05557	TRUE	-0.959801	CONTRACTED	0.0343893	-0.99419	TRUE
OG0005339	-44.5212	95.0423	-39.5979	91.1958	3.84648	TRUE	-1.29644	CONTRACTED	-0.051002	-1.24544	TRUE
OG0005348	-39.1217	84.2433	-35.0612	82.1224	2.12089	TRUE	-1.38632	CONTRACTED	-0.0255572	-1.36076	TRUE
OG0005360	-22.0354	50.0707	-17.2016	46.4031	3.66761	TRUE	-1.12905	CONTRACTED	-0.0193235	-1.10973	TRUE
OG0005365	-38.3744	82.7488	-27.0547	66.1094	16.6394	TRUE	-1.05446	CONTRACTED	-0.040685	-1.01377	TRUE
OG0005408	-13.2305	32.4611	-9.14034	30.2807	2.18038	TRUE	-0.806134	CONTRACTED	6.34e-05	-0.806197	TRUE
OG0005410	-44.7632	95.5265	-40.5283	93.0565	2.46991	TRUE	-0.665736	CONTRACTED	-0.0874284	-0.578308	TRUE
OG0005419	-29.3869	64.7738	-25.0097	62.0195	2.75436	TRUE	-1.88292	CONTRACTED	0.0330529	-1.91597	TRUE
OG0005433	-13.1455	32.2911	-9.0427	30.0854	2.20567	TRUE	-0.848906	CONTRACTED	8.69e-05	-0.848993	TRUE
OG0005461	-45.9314	97.8628	-41.2261	94.4522	3.41067	TRUE	-2.67133	CONTRACTED	0.0410242	-2.71235	TRUE
OG0005462	-43.0744	92.1489	-37.9352	87.8704	4.27851	TRUE	-0.28535	CONTRACTED	-0.0690271	-0.216323	TRUE
OG0005465	-24.0591	54.1181	-18.6341	49.2682	4.84988	TRUE	-1.58664	CONTRACTED	-0.0183752	-1.56826	TRUE
OG0005466	-27.0434	60.0868	-20.6824	53.3647	6.72209	TRUE	-0.683169	CONTRACTED	-0.0181904	-0.664979	TRUE
OG0005470	-35.8044	77.6088	-28.4465	68.893	8.71575	TRUE	-0.303559	CONTRACTED	-0.0420817	-0.261477	TRUE
OG0005476	-19.5326	45.0652	-14.6429	41.2857	3.77945	TRUE	-0.682283	CONTRACTED	-0.0181746	-0.664108	TRUE
OG0005477	-29.4086	64.8171	-24.0527	60.1055	4.71167	TRUE	-1.04364	CONTRACTED	-0.020308	-1.02333	TRUE
OG0005494	-38.3775	82.7551	-27.4107	66.8214	15.9337	TRUE	-0.973073	CONTRACTED	-0.0409189	-0.932154	TRUE
OG0005498	-44.4114	94.8227	-38.8246	89.6491	5.1736	TRUE	-1.10586	CONTRACTED	-0.0697755	-1.03608	TRUE
OG0005515	-27.3614	60.7228	-22.7908	57.5815	3.14132	TRUE	-0.838314	CONTRACTED	-0.0381075	-0.800207	TRUE
OG0005518	-45.1956	96.3911	-40.928	93.856	2.53513	TRUE	-0.479851	CONTRACTED	-0.0129865	-0.466865	TRUE
OG0005527	-21.3006	48.6013	-14.3099	40.6198	7.98142	TRUE	-1.08155	CONTRACTED	0	-1.08155	TRUE
OG0005532	-29.7475	65.495	-23.7719	59.5438	5.95118	TRUE	-1.11994	CONTRACTED	-0.0198632	-1.10008	TRUE
OG0005538	-16.1224	38.2447	-7.98497	27.9699	10.2748	TRUE	-0.739378	CONTRACTED	0.0001109	-0.739489	TRUE
OG0005543	-25.9112	57.8225	-20.6532	53.3064	4.51609	TRUE	-1.99948	CONTRACTED	0.0367046	-2.03618	TRUE
OG0005545	-31.2479	68.4957	-25.3725	62.7451	5.75065	TRUE	-0.356141	CONTRACTED	-0.0593242	-0.296817	TRUE
OG0005559	-14.8439	35.6879	-6.47487	24.9497	10.7382	TRUE	-0.333641	CONTRACTED	0	-0.333641	TRUE
OG0005571	-21.0683	48.1366	-16.0509	44.1018	4.03479	TRUE	-0.239495	CONTRACTED	-0.0180834	-0.221412	TRUE
OG0005597	-44.5223	95.0446	-36.7494	85.4989	9.54572	TRUE	-0.527006	CONTRACTED	0.0502884	-0.577294	TRUE
OG0005606	-26.2162	58.4324	-21.5944	55.1888	3.24361	TRUE	-0.629249	CONTRACTED	-0.019764	-0.609485	TRUE
OG0005629	-32.3014	70.6029	-23.0465	58.0931	12.5098	TRUE	-0.731789	CONTRACTED	0.0478322	-0.779621	TRUE
OG0005648	-37.9828	81.9655	-31.6686	75.3373	6.62821	TRUE	-0.976942	CONTRACTED	-0.0400224	-0.93692	TRUE
OG0005656	-38.7854	83.5708	-34.4189	80.8377	2.73302	TRUE	-0.481904	CONTRACTED	-0.0606222	-0.421282	TRUE
OG0005659	-42.5962	91.1925	-36.7843	85.5687	5.62378	TRUE	-0.18343	CONTRACTED	-0.0255326	-0.157897	TRUE
OG0005671	-39.8763	85.7526	-30.9394	73.8787	11.8738	TRUE	-1.0666	CONTRACTED	-0.0649239	-1.00168	TRUE
OG0005683	-26.5281	59.0562	-21.9825	55.965	3.09127	TRUE	-0.669662	CONTRACTED	-0.036008	-0.633654	TRUE
OG0005690	-16.2791	38.5582	-9.9819	31.9638	6.59445	TRUE	-0.652637	CONTRACTED	-0.0174901	-0.635147	TRUE
OG0005706	-36.7286	79.4573	-22.7538	57.5077	21.9496	TRUE	-1.52105	CONTRACTED	0.0154407	-1.53649	TRUE
OG0005711	-29.1051	64.2102	-22.3627	56.7253	7.48487	TRUE	-1.53389	CONTRACTED	-0.0381651	-1.49572	TRUE
OG0005717	-18.5796	43.1592	-11.1699	34.3398	8.81939	TRUE	-1.47684	CONTRACTED	0	-1.47684	TRUE
OG0005723	-28.8303	63.6605	-22.1355	56.271	7.38953	TRUE	-1.27365	CONTRACTED	-0.0387897	-1.23486	TRUE
OG0005728	-17.3956	40.7912	-11.1067	34.2134	6.57776	TRUE	-0.833054	CONTRACTED	-0.017327	-0.815727	TRUE
OG0005752	-24.0056	54.0112	-18.7064	49.4129	4.59837	TRUE	-1.10963	CONTRACTED	0.0156782	-1.12531	TRUE
OG0005762	-18.6857	43.3715	-12.1839	36.3677	7.00376	TRUE	-0.768305	CONTRACTED	-0.0174639	-0.750841	TRUE
OG0005766	-28.3653	62.7307	-23.2141	58.4283	4.30239	TRUE	-0.184656	CONTRACTED	0	-0.184656	TRUE
OG0005768	-43.6069	93.2138	-38.2299	88.4599	4.75398	TRUE	-1.19743	CONTRACTED	-0.0078882	-1.18954	TRUE
OG0005778	-32.7107	71.4214	-28.5739	69.1478	2.27361	TRUE	-1.14504	CONTRACTED	-0.0012933	-1.14375	TRUE
OG0005781	-37.4711	80.9422	-30.2192	72.4384	8.50375	TRUE	-1.79429	CONTRACTED	-0.0402289	-1.75406	TRUE
OG0005784	-25.886	57.7719	-20.9056	53.8112	3.96068	TRUE	-0.417883	CONTRACTED	-0.0194111	-0.398472	TRUE
OG0005786	-40.4235	86.8469	-31.0487	74.0974	12.7495	TRUE	-2.03112	CONTRACTED	0.0314466	-2.06257	TRUE
OG0005799	-32.0583	70.1166	-27.7248	67.4497	2.6669	TRUE	-1.23835	CONTRACTED	-0.0417064	-1.19664	TRUE
OG0005801	-29.5594	65.1188	-25.2544	62.5088	2.60994	TRUE	-2.36392	CONTRACTED	0.0097136	-2.37363	TRUE
OG0005802	-21.9429	49.8858	-17.4585	46.9169	2.96883	TRUE	-0.893907	CONTRACTED	-0.0374446	-0.856462	TRUE
OG0005819	-25.1826	56.3651	-20.301	52.602	3.76318	TRUE	-1.18302	CONTRACTED	0.0177782	-1.2008	TRUE
OG0005847	-17.5383	41.0766	-11.1325	34.2649	6.81166	TRUE	-1.1812	CONTRACTED	-0.0166936	-1.16451	TRUE
OG0005852	-31.821	69.6419	-26.1213	64.2426	5.39935	TRUE	-2.50228	CONTRACTED	-0.0453958	-2.45688	TRUE
OG0005879	-29.4911	64.9821	-24.7847	61.5693	3.4128	TRUE	-1.17966	CONTRACTED	-0.0403101	-1.13935	TRUE
OG0005882	-41.9386	89.8772	-37.5091	87.0182	2.85901	TRUE	-0.177753	CONTRACTED	-0.0220348	-0.155718	TRUE
OG0005885	-40.9932	87.9864	-29.4183	70.8366	17.1499	TRUE	-4.07784	CONTRACTED	-0.0367317	-4.04111	TRUE
OG0005887	-39.7523	85.5047	-33.4723	78.9446	6.56004	TRUE	-1.35528	CONTRACTED	-0.0018514	-1.35343	TRUE
OG0005898	-44.2483	94.4965	-39.1581	90.3162	4.18027	TRUE	-1.55775	CONTRACTED	-0.0952032	-1.46255	TRUE
OG0005956	-25.4121	56.8243	-20.4506	52.9011	3.92317	TRUE	-1.21656	CONTRACTED	-0.0189782	-1.19758	TRUE
OG0005983	-28.1343	62.2685	-23.9182	59.8363	2.43219	TRUE	-1.05134	CONTRACTED	0.0173144	-1.06865	TRUE
OG0006022	-44.1948	94.3895	-37.2754	86.5508	7.83878	TRUE	-2.91103	CONTRACTED	0.116437	-3.02747	TRUE
OG0006023	-34.2478	74.4957	-20.98	53.96	20.5356	TRUE	-1.83243	CONTRACTED	-0.0278995	-1.80453	TRUE
OG0006049	-28.4295	62.859	-23.7696	59.5393	3.31976	TRUE	-0.853388	CONTRACTED	-0.056206	-0.797182	TRUE
OG0006084	-20.992	47.9839	-16.0373	44.0747	3.90925	TRUE	-0.932721	CONTRACTED	-0.011575	-0.921146	TRUE
OG0006088	-24.8733	55.7467	-20.018	52.0359	3.71076	TRUE	-0.265515	CONTRACTED	-0.0132751	-0.25224	TRUE
OG0006095	-30.1268	66.2537	-24.9074	61.8148	4.43889	TRUE	-1.53512	CONTRACTED	-0.0189675	-1.51615	TRUE
OG0006096	-40.0034	86.0068	-35.2142	82.4284	3.57837	TRUE	-0.0973634	CONTRACTED	-0.0858835	-0.0114799	TRUE
OG0006103	-43.3001	92.6002	-38.599	89.198	3.40219	TRUE	-1.65844	CONTRACTED	-0.118242	-1.5402	TRUE
OG0006118	-27.653	61.306	-23.5611	59.1223	2.18374	TRUE	-0.797819	CONTRACTED	-0.057209	-0.74061	TRUE
OG0006124	-20.7904	47.5808	-15.3199	42.6398	4.94099	TRUE	-2.22484	CONTRACTED	-0.0180253	-2.20681	TRUE
OG0006128	-24.901	55.802	-20.8912	53.7824	2.01961	TRUE	-0.527544	CONTRACTED	-0.0577795	-0.469765	TRUE
OG0006136	-36.0544	78.1088	-31.9113	75.8226	2.28616	TRUE	-0.55193	CONTRACTED	-0.0535394	-0.498391	TRUE
OG0006145	-14.4466	34.8932	-7.55038	27.1008	7.79241	TRUE	-1.04854	CONTRACTED	0	-1.04854	TRUE
OG0006154	-43.9039	93.8079	-33.3833	78.7665	15.0414	TRUE	-1.28619	CONTRACTED	0.0041883	-1.29038	TRUE
OG0006172	-20.0402	46.0803	-14.6078	41.2157	4.86467	TRUE	-2.28622	CONTRACTED	-0.0177937	-2.26843	TRUE
OG0006200	-21.5779	49.1557	-15.9322	43.8643	5.29143	TRUE	-1.31272	CONTRACTED	-0.0003178	-1.3124	TRUE
OG0006203	-22.1389	50.2778	-16.1758	44.3516	5.92618	TRUE	-1.50214	CONTRACTED	0.0004153	-1.50256	TRUE
OG0006253	-26.5788	59.1576	-22.3185	56.6369	2.52069	TRUE	-1.12962	CONTRACTED	-0.037434	-1.09219	TRUE
OG0006263	-26.9107	59.8214	-20.3846	52.7693	7.05213	TRUE	-0.406407	CONTRACTED	-0.0731804	-0.333227	TRUE
OG0006268	-20.7904	47.5808	-15.3199	42.6398	4.94099	TRUE	-2.22484	CONTRACTED	-0.0180253	-2.20681	TRUE
OG0006277	-24.5227	55.0453	-20.0838	52.1676	2.87772	TRUE	-1.22704	CONTRACTED	-0.0394365	-1.1876	TRUE
OG0006278	-39.9917	85.9833	-34.109	80.218	5.76531	TRUE	-1.8711	CONTRACTED	-0.0201271	-1.85097	TRUE
OG0006297	-33.06	72.12	-28.4605	68.921	3.1989	TRUE	-1.98014	CONTRACTED	-0.0306643	-1.94948	TRUE
OG0006298	-27.9882	61.9763	-20.2243	52.4485	9.52778	TRUE	-1.19145	CONTRACTED	-0.0181077	-1.17334	TRUE
OG0006312	-25.0888	56.1775	-21.0585	54.117	2.06053	TRUE	-0.50165	CONTRACTED	-0.057028	-0.444622	TRUE
OG0006321	-41.6477	89.2954	-37.5187	87.0374	2.25799	TRUE	-0.31328	CONTRACTED	-0.133521	-0.179759	TRUE
OG0006345	-36.9476	79.8951	-30.7013	73.4025	6.49261	TRUE	-0.756978	CONTRACTED	-0.0224837	-0.734494	TRUE
OG0006351	-30.8785	67.757	-26.686	65.3721	2.38493	TRUE	-1.11326	CONTRACTED	-0.037544	-1.07572	TRUE
OG0006364	-19.212	44.4241	-12.9771	37.9541	6.46991	TRUE	-0.674677	CONTRACTED	-1e-07	-0.674677	TRUE
OG0006369	-41.7294	89.4588	-36.5671	85.1342	4.32455	TRUE	-1.28128	CONTRACTED	-0.0797226	-1.20156	TRUE
OG0006375	-34.2404	74.4809	-30.1535	72.3069	2.17393	TRUE	-1.34913	CONTRACTED	-0.0168066	-1.33232	TRUE
OG0006380	-37.7592	81.5185	-31.898	75.796	5.72246	TRUE	-1.82335	CONTRACTED	-0.0340671	-1.78928	TRUE
OG0006387	-40.1367	86.2734	-33.8528	79.7057	6.5677	TRUE	-1.94427	CONTRACTED	-0.0543042	-1.88997	TRUE
OG0006396	-28.4226	62.8453	-21.2802	54.5605	8.28481	TRUE	-0.602202	CONTRACTED	-0.0377735	-0.564428	TRUE
OG0006400	-27.7178	61.4356	-23.2025	58.405	3.03057	TRUE	-2.37636	CONTRACTED	-0.0380894	-2.33827	TRUE
OG0006403	-44.5408	95.0816	-39.9772	91.9544	3.12723	TRUE	-1.89412	CONTRACTED	-0.0203587	-1.87376	TRUE
OG0006416	-35.116	76.2319	-30.7931	73.5862	2.64568	TRUE	-1.59003	CONTRACTED	-0.0306828	-1.55935	TRUE
OG0006417	-26.7758	59.5517	-22.7483	57.4966	2.05511	TRUE	-0.0286662	CONTRACTED	-0.0340168	0.0053506	FALSE
OG0006423	-40.3084	86.6169	-35.6446	83.2891	3.32772	TRUE	-2.4773	CONTRACTED	-0.23677	-2.24053	TRUE
OG0006425	-28.0384	62.0767	-23.9662	59.9324	2.14434	TRUE	-1.87899	CONTRACTED	-0.018428	-1.86056	TRUE
OG0006429	-21.9852	49.9704	-16.5781	45.1562	4.81424	TRUE	-0.155827	CONTRACTED	-0.0401187	-0.115708	TRUE
OG0006430	-39.5306	85.0611	-31.7269	75.4538	9.60732	TRUE	-1.62939	CONTRACTED	-0.0909039	-1.53849	TRUE
OG0006444	-25.2656	56.5312	-20.857	53.714	2.81715	TRUE	-2.69856	CONTRACTED	-0.035708	-2.66285	TRUE
OG0006450	-39.24	84.4799	-20.6134	53.2267	31.2532	TRUE	-1.35394	CONTRACTED	-0.0100629	-1.34388	TRUE
OG0006477	-25.1991	56.3982	-21.1987	54.3975	2.00071	TRUE	-2.58303	CONTRACTED	-0.0600188	-2.52301	TRUE
OG0006483	-25.7562	57.5124	-21.6103	55.2205	2.29192	TRUE	-2.07265	CONTRACTED	-0.0393286	-2.03332	TRUE
OG0006498	-16.2324	38.4649	-11.3217	34.6434	3.82149	TRUE	-0.663447	CONTRACTED	-0.0176277	-0.645819	TRUE
OG0006503	-43.6722	93.3443	-37.1995	86.399	6.94531	TRUE	-0.804853	CONTRACTED	-0.140845	-0.664008	TRUE
OG0006510	-21.8445	49.689	-17.0367	46.0733	3.61567	TRUE	-1.96164	CONTRACTED	-0.0028529	-1.95879	TRUE
OG0006517	-16.8751	39.7501	-11.0922	34.1845	5.56567	TRUE	-2.27903	CONTRACTED	-0.0136272	-2.2654	TRUE
OG0006528	-43.3287	92.6573	-38.7916	89.5833	3.07407	TRUE	-0.331742	CONTRACTED	-0.0657565	-0.265985	TRUE
OG0006535	-48.0279	102.056	-41.5051	95.0102	7.04561	TRUE	-0.49072	CONTRACTED	-0.123679	-0.367041	TRUE
OG0006544	-34.323	74.6461	-22.7869	57.5738	17.0723	TRUE	-0.171378	CONTRACTED	-0.018366	-0.153012	TRUE
OG0006551	-33.5771	73.1541	-29.0688	70.1376	3.01655	TRUE	-1.49945	CONTRACTED	-0.0875798	-1.41187	TRUE
OG0006565	-33.6647	73.3294	-27.0655	66.1311	7.19831	TRUE	-2.69344	CONTRACTED	0.0026006	-2.69604	TRUE
OG0006568	-39.3026	84.6051	-32.7009	77.4018	7.20331	TRUE	-1.66973	CONTRACTED	-0.11549	-1.55424	TRUE
OG0006572	-22.8315	51.6629	-18.3705	48.741	2.92194	TRUE	-1.29767	CONTRACTED	-0.0366149	-1.26106	TRUE
OG0006581	-23.4531	52.9061	-19.0955	50.191	2.71508	TRUE	-0.550908	CONTRACTED	-0.0368555	-0.514052	TRUE
OG0006587	-49.7084	105.417	-43.2565	98.5131	6.9037	TRUE	-13.3175	CONTRACTED	-0.0919091	-13.2256	TRUE
OG0006589	-38.5675	83.135	-30.9898	73.9795	9.15551	TRUE	-4.51415	CONTRACTED	-0.0707504	-4.4434	TRUE
OG0006604	-44.841	95.6819	-40.6081	93.2161	2.4658	TRUE	-3.03812	CONTRACTED	-0.169838	-2.86828	TRUE
OG0006618	-41.5164	89.0328	-32.1047	76.2094	12.8234	TRUE	-0.45232	CONTRACTED	-0.0436797	-0.40864	TRUE
OG0006623	-33.3339	72.6678	-24.8238	61.6476	11.0202	TRUE	-1.17102	CONTRACTED	-0.0180769	-1.15294	TRUE
OG0006625	-32.3931	70.7861	-24.0042	60.0084	10.7778	TRUE	-1.51111	CONTRACTED	-0.0359273	-1.47518	TRUE
OG0006634	-43.0865	92.1731	-32.9323	77.8645	14.3086	TRUE	-0.478021	CONTRACTED	-0.0594114	-0.41861	TRUE
OG0006638	-31.2579	68.5157	-26.2374	64.4748	4.04096	TRUE	-2.41902	CONTRACTED	-0.0498839	-2.36914	TRUE
OG0006640	-18.8742	43.7483	-14.8235	41.6471	2.10125	TRUE	-0.916796	CONTRACTED	-0.0329877	-0.883808	TRUE
OG0006671	-33.548	73.096	-29.3214	70.6428	2.45318	TRUE	-1.15298	CONTRACTED	-0.077505	-1.07547	TRUE
OG0006695	-24.013	54.026	-18.6868	49.3735	4.65252	TRUE	-1.41588	CONTRACTED	-0.0337584	-1.38212	TRUE
OG0006698	-33.3554	72.7108	-26.0031	64.0062	8.70452	TRUE	-2.01858	CONTRACTED	-0.0582633	-1.96032	TRUE
OG0006711	-35.2843	76.5687	-25.8133	63.6265	12.9421	TRUE	-0.450176	CONTRACTED	-0.0354165	-0.41476	TRUE
OG0006731	-27.0969	60.1939	-21.8016	55.6032	4.59073	TRUE	-2.94788	CONTRACTED	-0.0365336	-2.91135	TRUE
OG0006749	-29.792	65.5841	-25.7649	63.5297	2.05433	TRUE	-2.30285	CONTRACTED	-0.0698726	-2.23298	TRUE
OG0006768	-34.5066	75.0132	-28.8535	69.7071	5.30611	TRUE	-1.94039	CONTRACTED	-0.0536409	-1.88675	TRUE
OG0006779	-36.8843	79.7686	-31.5223	75.0446	4.72398	TRUE	-1.57634	CONTRACTED	-0.0747877	-1.50155	TRUE
OG0006781	-46.7047	99.4093	-41.28	94.5601	4.84924	TRUE	-0.410806	CONTRACTED	-0.547164	0.136358	FALSE
OG0006788	-31.8691	69.7382	-27.4617	66.9235	2.81475	TRUE	-2.0136	CONTRACTED	-0.0429329	-1.97067	TRUE
OG0006794	-35.4592	76.9184	-30.8298	73.6595	3.2589	TRUE	-1.21192	CONTRACTED	-0.0749424	-1.13698	TRUE
OG0006804	-29.9208	65.8417	-22.8351	57.6703	8.17138	TRUE	-2.4907	CONTRACTED	-0.0565054	-2.43419	TRUE
OG0006859	-35.9004	77.8008	-27.4575	66.915	10.8858	TRUE	-4.60853	CONTRACTED	-0.0186385	-4.58989	TRUE
OG0006896	-37.1089	80.2178	-30.4695	72.939	7.27877	TRUE	-0.707227	CONTRACTED	-0.0992828	-0.607944	TRUE
OG0006923	-24.4765	54.9529	-19.6607	51.3213	3.63159	TRUE	-0.30541	CONTRACTED	-0.0955566	-0.209853	TRUE
OG0006932	-26.4916	58.9832	-21.1843	54.3687	4.61451	TRUE	-1.38064	CONTRACTED	-0.0046408	-1.376	TRUE
OG0006947	-28.994	63.9879	-23.8854	59.7708	4.21715	TRUE	-0.272341	CONTRACTED	-0.0321414	-0.2402	TRUE
OG0006952	-27.4898	60.9796	-20.5437	53.0875	7.89214	TRUE	-2.15563	CONTRACTED	-0.0307786	-2.12485	TRUE
OG0006957	-23.7581	53.5163	-19.693	51.386	2.13024	TRUE	-1.23645	CONTRACTED	-0.0524251	-1.18402	TRUE
OG0006961	-22.4391	50.8783	-17.9456	47.8912	2.98701	TRUE	-0.209578	CONTRACTED	-0.0976349	-0.111943	TRUE
OG0006967	-32.1	70.2	-25.1154	62.2308	7.96914	TRUE	-1.24076	CONTRACTED	-0.0228825	-1.21788	TRUE
OG0006975	-36.6911	79.3823	-31.307	74.6141	4.76819	TRUE	-2.1475	CONTRACTED	0.0800571	-2.22756	TRUE
OG0006976	-49.9721	105.944	-44.5084	101.017	4.92749	TRUE	-12.7578	CONTRACTED	-0.62915	-12.1287	TRUE
OG0006978	-40.2266	86.4532	-32.723	77.446	9.0072	TRUE	-1.18091	CONTRACTED	-0.13071	-1.0502	TRUE
OG0006999	-40.9693	87.9386	-36.0273	84.0545	3.88409	TRUE	-1.50421	CONTRACTED	-0.0901598	-1.41405	TRUE
OG0007021	-33.0191	72.0381	-26.7172	65.4344	6.60372	TRUE	-2.69296	CONTRACTED	-0.0803585	-2.6126	TRUE
OG0007025	-37.6	81.1999	-29.6461	71.2922	9.90773	TRUE	-1.53714	CONTRACTED	-0.134537	-1.4026	TRUE
OG0007031	-26.1723	58.3445	-18.4175	48.8351	9.50946	TRUE	-1.82827	CONTRACTED	-0.0500581	-1.77821	TRUE
OG0007034	-29.3266	64.6532	-21.1102	54.2203	10.4328	TRUE	-2.40268	CONTRACTED	-0.0221884	-2.38049	TRUE
OG0007044	-29.697	65.394	-22.7706	57.5412	7.85276	TRUE	-3.04306	CONTRACTED	-0.0777626	-2.9653	TRUE
OG0007046	-34.3966	74.7933	-29.7236	71.4471	3.34615	TRUE	-2.30858	CONTRACTED	0.0007249	-2.3093	TRUE
OG0007052	-25.0088	56.0177	-18.2198	48.4395	7.57814	TRUE	-0.553088	CONTRACTED	-0.0546334	-0.498455	TRUE
OG0007074	-34.0154	74.0308	-27.3761	66.7522	7.27857	TRUE	-0.0711379	CONTRACTED	-0.0907454	0.0196075	FALSE
OG0007081	-38.4298	82.8596	-24.8532	61.7065	21.1532	TRUE	-2.0283	CONTRACTED	-0.0594229	-1.96888	TRUE
OG0007089	-32.5613	71.1225	-28.4672	68.9344	2.18815	TRUE	-1.23148	CONTRACTED	-0.0524321	-1.17905	TRUE
OG0007091	-32.2171	70.4343	-19.7868	51.5735	18.8607	TRUE	-0.588929	CONTRACTED	-0.0544794	-0.53445	TRUE
OG0007092	-40.6277	87.2555	-29.1472	70.2944	16.9611	TRUE	-1.10153	CONTRACTED	-0.0514947	-1.05004	TRUE
OG0007101	-36.2731	78.5463	-26.0214	64.0429	14.5034	TRUE	-1.96689	CONTRACTED	-0.0753884	-1.8915	TRUE
OG0007126	-39.5195	85.039	-34.7297	81.4593	3.57972	TRUE	-2.06404	CONTRACTED	-0.0936125	-1.97043	TRUE
OG0007138	-32.844	71.6881	-24.3311	60.6622	11.0258	TRUE	-0.886866	CONTRACTED	-0.0557242	-0.831142	TRUE
OG0007139	-38.3279	82.6557	-34.291	80.5819	2.07379	TRUE	-1.16963	CONTRACTED	-0.138114	-1.03152	TRUE
OG0007152	-27.6595	61.319	-21.445	54.8901	6.42897	TRUE	-3.48241	CONTRACTED	-0.10079	-3.38162	TRUE
OG0007156	-28.5862	63.1723	-23.0751	58.1501	5.0222	TRUE	-1.62343	CONTRACTED	-0.0668991	-1.55653	TRUE
OG0007170	-39.2808	84.5616	-33.8839	79.7679	4.79372	TRUE	-1.53623	CONTRACTED	-0.198525	-1.3377	TRUE
OG0007178	-35.4964	76.9928	-27.9904	67.9807	9.01202	TRUE	-0.80091	CONTRACTED	-0.124171	-0.676739	TRUE
OG0007279	-38.9587	83.9173	-31.9688	75.9375	7.97979	TRUE	-1.89572	CONTRACTED	-0.0765819	-1.81914	TRUE
OG0007280	-33.1314	72.2629	-26.916	65.8321	6.43082	TRUE	-1.3145	CONTRACTED	-0.1402	-1.1743	TRUE
OG0007299	-32.2247	70.4495	-27.9297	67.8594	2.59011	TRUE	-3.36965	CONTRACTED	-0.127714	-3.24194	TRUE
OG0007310	-36.1289	78.2578	-28.7074	69.4148	8.84299	TRUE	-0.866698	CONTRACTED	-0.038471	-0.828227	TRUE
OG0007325	-37.5184	81.0368	-30.7609	73.5219	7.51498	TRUE	-0.195366	CONTRACTED	-0.196091	0.000725	FALSE
OG0007337	-41.559	89.1181	-35.8135	83.627	5.49107	TRUE	-0.772032	CONTRACTED	0.0505142	-0.822546	TRUE
OG0007373	-40.9773	87.9546	-33.8183	79.6365	8.31806	TRUE	-4.01139	CONTRACTED	-0.0891111	-3.92228	TRUE
OG0007385	-41.1505	88.3009	-36.9519	85.9037	2.39717	TRUE	-0.306336	CONTRACTED	-0.189714	-0.116622	TRUE
OG0007390	-34.183	74.3661	-28.8961	69.7921	4.57391	TRUE	-3.19052	CONTRACTED	-0.147354	-3.04317	TRUE
OG0007392	-40.7824	87.5647	-32.8353	77.6706	9.89414	TRUE	-0.0245712	CONTRACTED	-0.191171	0.1666	FALSE
OG0007396	-32.1579	70.3157	-28.0334	68.0667	2.24902	TRUE	-0.569766	CONTRACTED	-0.0436163	-0.52615	TRUE
OG0007405	-42.2759	90.5518	-37.2686	86.5372	4.01459	TRUE	-0.33067	CONTRACTED	0	-0.33067	TRUE
OG0007411	-39.5217	85.0434	-35.2645	82.529	2.51444	TRUE	-11.2855	CONTRACTED	-0.121918	-11.1636	TRUE
OG0007418	-36.027	78.0541	-31.2166	74.4332	3.62093	TRUE	-2.5212	CONTRACTED	-0.13857	-2.38263	TRUE
OG0007429	-38.2125	82.425	-32.5044	77.0089	5.41612	TRUE	-3.88721	CONTRACTED	-0.2181	-3.66911	TRUE
OG0007431	-36.0983	78.1966	-31.5839	75.1677	3.02883	TRUE	-2.43507	CONTRACTED	-0.0067336	-2.42834	TRUE
OG0007487	-35.5277	77.0554	-30.4055	72.811	4.24439	TRUE	-2.48557	CONTRACTED	-0.161311	-2.32426	TRUE
OG0007510	-34.9384	75.8768	-25.7518	63.5036	12.3731	TRUE	-2.11762	CONTRACTED	-0.030961	-2.08666	TRUE
OG0007511	-39.4635	84.9269	-34.4278	80.8555	4.0714	TRUE	-5.04067	CONTRACTED	0.0571749	-5.09784	TRUE
OG0007562	-28.5196	63.0391	-23.5388	59.0775	3.96159	TRUE	-0.769022	CONTRACTED	-0.122766	-0.646256	TRUE
OG0007565	-32.1369	70.2737	-27.0429	66.0857	4.18798	TRUE	-0.0180652	CONTRACTED	-0.121192	0.103127	FALSE
OG0007572	-38.6154	83.2308	-33.8395	79.6791	3.55174	TRUE	-0.223309	CONTRACTED	-0.249895	0.026586	FALSE
OG0007620	-40.4673	86.9345	-34.3941	80.7883	6.14622	TRUE	-0.865369	CONTRACTED	-0.177203	-0.688166	TRUE
OG0007731	-32.6006	71.2011	-27.3883	66.7767	4.42446	TRUE	-1.58424	CONTRACTED	-0.15663	-1.42761	TRUE
OG0007762	-34.4966	74.9932	-28.4457	68.8915	6.10174	TRUE	-0.894978	CONTRACTED	0.0149099	-0.909888	TRUE
OG0007841	-39.7282	85.4565	-34.075	80.15	5.30646	TRUE	-2.1513	CONTRACTED	0.0047718	-2.15607	TRUE
OG0007932	-34.3232	74.6464	-28.9932	69.9863	4.66008	TRUE	-1.28784	CONTRACTED	-0.0712384	-1.2166	TRUE
OG0007936	-20.4572	46.9144	-14.221	40.442	6.47237	TRUE	-0.16325	CONTRACTED	-0.0403671	-0.122883	TRUE
OG0007943	-44.3472	94.6944	-36.2618	84.5235	10.1709	TRUE	-39.5813	CONTRACTED	-0.812423	-38.7689	TRUE
OG0008032	-26.0896	58.1793	-22.0277	56.0554	2.12394	TRUE	-0.430553	CONTRACTED	-0.063283	-0.36727	TRUE
OG0008045	-31.919	69.838	-27.9064	67.8127	2.0253	TRUE	-3.33647	CONTRACTED	-0.0287156	-3.30775	TRUE
OG0008225	-38.4206	82.8411	-34.0604	80.1208	2.72028	TRUE	-12.2459	CONTRACTED	-0.654041	-11.5919	TRUE
OG0008311	-27.7057	61.4115	-22.4557	56.9113	4.50015	TRUE	-1.7417	CONTRACTED	-0.0056021	-1.7361	TRUE
OG0008413	-26.6345	59.269	-22.2657	56.5315	2.73752	TRUE	-1.85538	CONTRACTED	-0.104268	-1.75111	TRUE
OG0008507	-34.3387	74.6775	-23.1109	58.2218	16.4557	TRUE	-8.47376	CONTRACTED	-0.0878974	-8.38586	TRUE
OG0008539	-35.9937	77.9873	-29.9881	71.9762	6.01112	TRUE	-4.16732	CONTRACTED	-0.172958	-3.99436	TRUE
OG0008558	-30.39	66.78	-24.9172	61.8344	4.94552	TRUE	-0.224231	CONTRACTED	0.715954	-0.940185	TRUE
OG0008607	-30.5483	67.0966	-25.7224	63.4448	3.65182	TRUE	-6.48067	CONTRACTED	-0.350373	-6.1303	TRUE
OG0008628	-34.3156	74.6311	-29.7126	71.4252	3.2059	TRUE	-2.59157	CONTRACTED	-0.346107	-2.24546	TRUE
OG0008658	-35.0398	76.0796	-30.7263	73.4526	2.62697	TRUE	0	CONTRACTED	-4.07194	4.07194	FALSE
OG0008838	-24.0814	54.1628	-18.1188	48.2376	5.92518	TRUE	-4.29588	CONTRACTED	0.136129	-4.43201	TRUE
OG0008883	-32.2759	70.5519	-28.2602	68.5204	2.03152	TRUE	-0.349005	CONTRACTED	-1.02162	0.672615	FALSE
OG0008963	-29.9101	65.8202	-21.1321	54.2642	11.5559	TRUE	-3.79269	CONTRACTED	-0.133103	-3.65959	TRUE
OG0008966	-31.9489	69.8978	-21.965	55.93	13.9679	TRUE	-10.4642	CONTRACTED	-0.0881698	-10.376	TRUE
OG0008982	-30.5541	67.1082	-21.1132	54.2264	12.8818	TRUE	-1.75574	CONTRACTED	0	-1.75574	TRUE
OG0009114	-22.9434	51.8867	-18.009	48.0179	3.86883	TRUE	-3.75601	CONTRACTED	-0.252699	-3.50331	TRUE
OG0009115	-30.1814	66.3628	-26.155	64.31	2.05279	TRUE	-23.8733	CONTRACTED	-0.774536	-23.0988	TRUE
OG0009132	-26.8723	59.7445	-20.2923	52.5846	7.15996	TRUE	-1.04114	CONTRACTED	-0.0667745	-0.974365	TRUE
OG0009140	-32.1042	70.2083	-28.0425	68.085	2.12332	TRUE	-8.22991	CONTRACTED	-9.83601	1.6061	FALSE
OG0009160	-28.9508	63.9016	-23.846	59.6919	4.20968	TRUE	-0.0055423	CONTRACTED	-0.236522	0.23098	FALSE
OG0009274	-17.8655	41.731	-12.6749	37.3497	4.38124	TRUE	-3.36152	CONTRACTED	-0.0808531	-3.28067	TRUE
OG0009303	-23.9467	53.8933	-17.1831	46.3662	7.52708	TRUE	-1.32762	CONTRACTED	-0.13373	-1.19389	TRUE
OG0009311	-25.7255	57.451	-18.4353	48.8706	8.58044	TRUE	-2.12181	CONTRACTED	-0.0878993	-2.03391	TRUE
OG0009312	-28.9079	63.8158	-13.131	38.2621	25.5537	TRUE	-8.07363	CONTRACTED	-0.061919	-8.01171	TRUE
OG0009471	-17.7719	41.5437	-13.6707	39.3413	2.20239	TRUE	-0.816979	CONTRACTED	0.0576052	-0.874584	TRUE
OG0009554	-29.1504	64.3007	-24.1812	60.3625	3.93823	TRUE	-2.88052	CONTRACTED	-0.156266	-2.72425	TRUE
OG0009601	-28.4617	62.9235	-23.2179	58.4357	4.48774	TRUE	-20.4572	CONTRACTED	-231.448	210.991	FALSE
OG0009617	-18.0325	42.0651	-11.674	35.348	6.71705	TRUE	-3446.11	CONTRACTED	-66.0602	-3380.05	TRUE
OG0009710	-21.4337	48.8674	-15.3766	42.7533	6.11409	TRUE	-2.42296	CONTRACTED	-0.191718	-2.23124	TRUE
OG0009903	-25.7106	57.4212	-18.9921	49.9843	7.43687	TRUE	-4.73738	CONTRACTED	-0.174704	-4.56268	TRUE
OG0009989	-23.8854	53.7708	-17.2448	46.4897	7.28113	TRUE	-3.00185	CONTRACTED	-0.200172	-2.80168	TRUE
OG0010085	-24.8638	55.7276	-19.4699	50.9398	4.78778	TRUE	-15.7662	CONTRACTED	-60.4576	44.6914	FALSE
OG0010164	-24.3417	54.6835	-19.4442	50.8884	3.79506	TRUE	-13.05	CONTRACTED	-0.824387	-12.2256	TRUE
OG0010213	-19.5541	45.1081	-15.1072	42.2144	2.89367	TRUE	-0.53734	CONTRACTED	-0.212705	-0.324635	TRUE
OG0010288	-21.9816	49.9631	-15.3926	42.7853	7.17789	TRUE	-37.4315	CONTRACTED	-21.6025	-15.829	TRUE
OG0010428	-22.2831	50.5662	-18.11	48.2199	2.3463	TRUE	-20.331	CONTRACTED	-0.935057	-19.3959	TRUE
OG0010444	-21.042	48.0841	-15.769	43.5381	4.546	TRUE	-1.82434	CONTRACTED	-0.533914	-1.29043	TRUE
OG0010519	-22.5678	51.1355	-17.1106	46.2211	4.91439	TRUE	-0.870263	CONTRACTED	-0.237069	-0.633194	TRUE
OG0010896	-21.0191	48.0383	-16.4372	44.8745	3.16381	TRUE	-2.07744	CONTRACTED	-0.284876	-1.79256	TRUE
OG0011210	-15.5692	37.1384	-11.3763	34.7525	2.3859	TRUE	-7.76057	CONTRACTED	0.296881	-8.05745	TRUE
OG0011463	-19.2605	44.521	-14.7552	41.5104	3.0106	TRUE	-0.165221	CONTRACTED	0.651918	-0.817139	TRUE
OG0012146	-16.8014	39.6028	-12.0931	36.1861	3.41673	TRUE	-80.7386	CONTRACTED	-238.568	157.829	FALSE
OG0012271	-14.6357	35.2714	-8.27718	28.5544	6.71702	TRUE	-151.508	CONTRACTED	-2654.14	2502.63	FALSE
OG0012277	-16.8853	39.7706	-11.9993	35.9986	3.77198	TRUE	-3.15523	CONTRACTED	-0.289163	-2.86607	TRUE
OG0012347	-14.2805	34.561	-10.2109	32.4217	2.13923	TRUE	-0.736559	CONTRACTED	-3.0364	2.29984	FALSE
OG0012557	-15.6362	37.2724	-11.507	35.0141	2.25838	TRUE	-11.2941	CONTRACTED	-406.811	395.517	FALSE
OG0013297	-13.7362	33.4724	-7.66859	27.3372	6.13527	TRUE	-36892400	CONTRACTED	-270720000	233827600	FALSE
OG0013314	-15.6385	37.2769	-11.0539	34.1077	3.16923	TRUE	-0.537083	CONTRACTED	-1.21759	0.680507	FALSE
OG0013319	-14.996	35.992	-10.3473	32.6947	3.29731	TRUE	-0.0078163	CONTRACTED	-1.7201	1.71228	FALSE
OG0013321	-14.996	35.992	-10.3473	32.6947	3.29731	TRUE	-0.0078163	CONTRACTED	-1.7201	1.71228	FALSE
OG0013355	-15.7076	37.4153	-11.1166	34.2333	3.18197	TRUE	-0.00647	CONTRACTED	-1.49189	1.48542	FALSE
OG0014803	-13.0443	32.0886	-7.39224	26.7845	5.30414	TRUE	-0.749493	CONTRACTED	0.0031804	-0.752673	TRUE
OG0014816	-13.1089	32.2177	-6.54757	25.0951	7.12258	TRUE	-0.43348	CONTRACTED	-5.87392	5.44044	FALSE
OG0014820	-13.1971	32.3942	-6.52123	25.0425	7.35171	TRUE	-6.70979	CONTRACTED	-1.11422	-5.59557	TRUE
OG0014832	-13.1971	32.3942	-6.52123	25.0425	7.35171	TRUE	-6.70979	CONTRACTED	-1.11422	-5.59557	TRUE
OG0014877	-13.0466	32.0933	-6.4417	24.8834	7.20989	TRUE	-69.9218	CONTRACTED	-210.002	140.08	FALSE
OG0000003	-157.37	320.74	-160.383	332.766	-12.026	FALSE
OG0000004	-143.162	292.323	-140.625	293.25	-0.926972	FALSE
OG0000005	-145.87	297.739	-150.794	313.587	-15.848	FALSE
OG0000007	-147.039	300.078	-145.488	302.977	-2.89865	FALSE
OG0000008	-158.963	323.926	-162.776	337.551	-13.626	FALSE
OG0000009	-144.184	294.367	-148.518	309.035	-14.6683	FALSE
OG0000012	-154.361	314.722	-156.822	325.644	-10.9223	FALSE
OG0000013	-140.315	286.631	-152.716	317.433	-30.8022	FALSE
OG0000014	-147.996	301.991	-146.738	305.476	-3.48446	FALSE
OG0000015	-92.6221	191.244	-103.201	218.402	-27.1573	FALSE
OG0000016	-128.164	262.327	-128.941	269.881	-7.55406	FALSE
OG0000017	-127.765	261.529	-124.913	261.827	-0.297453	FALSE
OG0000018	-150.376	306.752	-160.565	333.131	-26.3792	FALSE
OG0000019	-136.662	279.324	-133.949	279.899	-0.574627	FALSE
OG0000020	-132.821	271.642	-130.241	272.483	-0.840658	FALSE
OG0000021	-113.713	233.425	-112.589	237.177	-3.75198	FALSE
OG0000022	-138.299	282.598	-137.302	286.604	-4.00597	FALSE
OG0000023	-108.141	222.281	-109.439	230.877	-8.596	FALSE
OG0000024	-136.487	278.975	-135.968	283.937	-4.9616	FALSE
OG0000026	-106.443	218.886	-106.319	224.637	-5.75111	FALSE
OG0000027	-115.61	237.219	-120.084	252.169	-14.9496	FALSE
OG0000028	-126.209	258.418	-138.263	288.526	-30.1077	FALSE
OG0000029	-112.065	230.13	-112.558	237.117	-6.98725	FALSE
OG0000030	-109.23	224.461	-108.011	228.023	-3.56179	FALSE
OG0000031	-116.748	239.496	-118.829	249.657	-10.1609	FALSE
OG0000032	-120.691	247.382	-120.167	252.334	-4.95193	FALSE
OG0000033	-102.096	210.192	-99.3107	210.621	-0.429165	FALSE
OG0000034	-120.058	246.117	-120.196	252.392	-6.27549	FALSE
OG0000035	-92.9729	191.946	-97.4398	206.88	-14.9339	FALSE
OG0000036	-104.359	214.718	-105.898	223.797	-9.07876	FALSE
OG0000037	-125.264	256.527	-127.255	266.511	-9.98333	FALSE
OG0000038	-88.5854	183.171	-87.9021	187.804	-4.63356	FALSE
OG0000039	-101.305	208.609	-100.504	213.007	-4.39832	FALSE
OG0000040	-111.185	228.37	-109.062	230.123	-1.75357	FALSE
OG0000041	-102.896	211.792	-103.853	219.706	-7.91379	FALSE
OG0000042	-120.381	246.763	-128.238	268.477	-21.7141	FALSE
OG0000043	-129.506	265.011	-137.207	286.413	-21.4021	FALSE
OG0000045	-117.492	240.984	-123.617	259.233	-18.2496	FALSE
OG0000046	-106.974	219.949	-106.424	224.848	-4.89901	FALSE
OG0000047	-116.451	238.902	-117.254	246.507	-7.60559	FALSE
OG0000050	-121.071	248.141	-120.185	252.37	-4.22927	FALSE
OG0000051	-126.749	259.498	-126.259	264.517	-5.01987	FALSE
OG0000052	-116.145	238.289	-115.341	242.683	-4.39319	FALSE
OG0000053	-115.873	237.746	-114.285	240.571	-2.82512	FALSE
OG0000054	-125.098	256.197	-125.26	262.52	-6.32315	FALSE
OG0000055	-114.355	234.709	-114.626	241.253	-6.54356	FALSE
OG0000056	-118.465	242.93	-118.583	249.166	-6.23547	FALSE
OG0000057	-110.726	227.453	-108.45	228.899	-1.44641	FALSE
OG0000059	-113.9	233.8	-111.562	235.125	-1.32476	FALSE
OG0000060	-110.047	226.095	-110.008	232.017	-5.92169	FALSE
OG0000062	-120.21	246.421	-122.661	257.321	-10.9005	FALSE
OG0000063	-123.334	252.667	-128.658	269.316	-16.6485	FALSE
OG0000064	-107.273	220.547	-109.313	230.627	-10.0804	FALSE
OG0000065	-95.2044	196.409	-96.5147	205.029	-8.62049	FALSE
OG0000066	-107.729	221.457	-106.331	224.662	-3.20491	FALSE
OG0000067	-106.221	218.441	-105.851	223.701	-5.26011	FALSE
OG0000068	-110.822	227.645	-110.092	232.183	-4.53858	FALSE
OG0000069	-108.25	222.5	-112.456	236.911	-14.4118	FALSE
OG0000070	-101.443	208.887	-111.507	235.014	-26.1268	FALSE
OG0000071	-100.549	207.098	-101.827	215.653	-8.55576	FALSE
OG0000073	-113.552	233.104	-112.84	237.68	-4.5764	FALSE
OG0000074	-123.146	252.292	-122.857	257.715	-5.42288	FALSE
OG0000075	-102.227	210.455	-111.835	235.669	-25.2144	FALSE
OG0000076	-121.411	248.821	-118.705	249.41	-0.588848	FALSE
OG0000077	-119.261	244.522	-119.099	250.199	-5.67661	FALSE
OG0000078	-123.102	252.203	-122.481	256.962	-4.75848	FALSE
OG0000079	-98.184	202.368	-99.3278	210.656	-8.28749	FALSE
OG0000080	-94.0822	194.164	-93.3054	198.611	-4.44636	FALSE
OG0000081	-119.924	245.848	-148.29	308.58	-62.7318	FALSE
OG0000082	-109.658	225.316	-114.597	241.194	-15.8784	FALSE
OG0000083	-110.332	226.663	-120.091	252.183	-25.5196	FALSE
OG0000084	-114.374	234.748	-114.303	240.606	-5.85767	FALSE
OG0000085	-85.22	176.44	-83.9336	179.867	-3.42725	FALSE
OG0000086	-111.173	228.345	-109.641	231.282	-2.93664	FALSE
OG0000087	-92.423	190.846	-94.8194	201.639	-10.7928	FALSE
OG0000088	-110.461	226.922	-109.724	231.447	-4.52482	FALSE
OG0000090	-101.37	208.74	-100.169	212.338	-3.59726	FALSE
OG0000091	-98.9985	203.997	-111.004	234.008	-30.0106	FALSE
OG0000092	-115.629	237.259	-124.896	261.793	-24.5342	FALSE
OG0000093	-89.68	185.36	-87.4282	186.856	-1.49647	FALSE
OG0000094	-101.375	208.75	-100.683	213.365	-4.61516	FALSE
OG0000095	-102.11	210.221	-101.658	215.316	-5.0953	FALSE
OG0000096	-109.44	224.879	-107.563	227.127	-2.24792	FALSE
OG0000097	-110.687	227.375	-110.701	233.402	-6.02753	FALSE
OG0000098	-97.0481	200.096	-99.7202	211.44	-11.3443	FALSE
OG0000099	-68.5633	143.127	-69.0882	150.176	-7.04981	FALSE
OG0000100	-117.22	240.441	-114.5	241	-0.558621	FALSE
OG0000101	-102.779	211.558	-100.715	213.43	-1.87184	FALSE
OG0000102	-101.38	208.76	-133.005	278.01	-69.2499	FALSE
OG0000103	-116.878	239.756	-115.547	243.094	-3.33783	FALSE
OG0000104	-106.87	219.74	-106.311	224.621	-4.88075	FALSE
OG0000105	-109.002	224.003	-107.297	226.594	-2.59058	FALSE
OG0000106	-90.3121	186.624	-88.3652	188.73	-2.10625	FALSE
OG0000107	-91.1476	188.295	-91.8991	195.798	-7.50308	FALSE
OG0000108	-105.921	217.842	-104.67	221.34	-3.49799	FALSE
OG0000109	-98.8462	203.692	-98.2684	208.537	-4.8444	FALSE
OG0000110	-112.021	230.043	-109.875	231.75	-1.70699	FALSE
OG0000111	-115.53	237.061	-126.868	265.737	-28.6763	FALSE
OG0000112	-108.365	222.731	-108.68	229.359	-6.6282	FALSE
OG0000113	-103.49	212.98	-103.053	218.106	-5.12666	FALSE
OG0000114	-102.268	210.536	-103.635	219.271	-8.73495	FALSE
OG0000115	-92.1385	190.277	-91.6857	195.371	-5.09441	FALSE
OG0000116	-102.607	211.214	-102.307	216.613	-5.39929	FALSE
OG0000117	-95.5743	197.149	-92.1347	196.269	0.879338	FALSE
OG0000118	-108.557	223.115	-106.419	224.839	-1.72394	FALSE
OG0000119	-94.5731	195.146	-94.0241	200.048	-4.902	FALSE
OG0000120	-89.4337	184.867	-88.7587	189.517	-4.65	FALSE
OG0000121	-106.687	219.374	-106.004	224.008	-4.6336	FALSE
OG0000122	-109.616	225.232	-109.243	230.486	-5.25386	FALSE
OG0000123	-92.9481	191.896	-93.3916	198.783	-6.88704	FALSE
OG0000124	-102.743	211.485	-110.37	232.739	-21.2541	FALSE
OG0000125	-105.05	216.1	-105.001	222.002	-5.9016	FALSE
OG0000126	-108.028	222.057	-107.692	227.383	-5.32634	FALSE
OG0000127	-103.314	212.627	-101.972	215.944	-3.31678	FALSE
OG0000128	-113.089	232.178	-132.557	277.113	-44.9353	FALSE
OG0000129	-87.3164	180.633	-87.8637	187.727	-7.09454	FALSE
OG0000130	-99.0202	204.04	-99.4144	210.829	-6.78837	FALSE
OG0000131	-85.1446	176.289	-87.8933	187.787	-11.4974	FALSE
OG0000132	-111.317	228.634	-110.368	232.736	-4.10273	FALSE
OG0000133	-108.107	222.215	-109.753	231.506	-9.29116	FALSE
OG0000134	-85.7095	177.419	-84.3274	180.655	-3.23572	FALSE
OG0000135	-106.881	219.761	-106.562	225.125	-5.36341	FALSE
OG0000136	-88.3721	182.744	-86.0894	184.179	-1.43469	FALSE
OG0000137	-108.669	223.338	-108.465	228.93	-5.59155	FALSE
OG0000138	-99.5045	205.009	-98.2345	208.469	-3.46008	FALSE
OG0000139	-91.9224	189.845	-89.9341	191.868	-2.02341	FALSE
OG0000140	-84.6671	175.334	-84.9833	181.967	-6.63241	FALSE
OG0000141	-108.522	223.045	-112.533	237.067	-14.0221	FALSE
OG0000142	-105.487	216.973	-105.268	222.535	-5.56175	FALSE
OG0000143	-92.0427	190.085	-91.8474	195.695	-5.60944	FALSE
OG0000144	-82.7104	171.421	-82.9172	177.834	-6.4136	FALSE
OG0000145	-45.3461	96.6922	-48.6379	109.276	-12.5836	FALSE
OG0000146	-108.114	222.228	-124.22	260.439	-38.2111	FALSE
OG0000147	-95.7341	197.468	-94.4891	200.978	-3.50995	FALSE
OG0000148	-91.1702	188.34	-90.8909	193.782	-5.44142	FALSE
OG0000149	-80.5108	167.022	-78.9019	169.804	-2.78228	FALSE
OG0000150	-113.133	232.266	-147.733	307.466	-75.1998	FALSE
OG0000151	-87.8897	181.779	-86.4283	184.857	-3.07713	FALSE
OG0000152	-85.4354	176.871	-84.8656	181.731	-4.86037	FALSE
OG0000153	-90.8616	187.723	-90.6093	193.219	-5.49538	FALSE
OG0000154	-106.358	218.716	-108.859	229.718	-11.0011	FALSE
OG0000155	-107.242	220.483	-110.012	232.024	-11.5403	FALSE
OG0000156	-102.239	210.478	-105.519	223.037	-12.5597	FALSE
OG0000157	-97.1957	200.391	-97.535	207.07	-6.67853	FALSE
OG0000158	-80.8842	167.768	-81.2653	174.531	-6.76208	FALSE
OG0000159	-97.0756	200.151	-96.5869	205.174	-5.02261	FALSE
OG0000160	-92.5779	191.156	-91.7312	195.462	-4.30658	FALSE
OG0000161	-76.8934	159.787	-76.1402	164.28	-4.49355	FALSE
OG0000163	-89.1326	184.265	-93.6148	199.23	-14.9644	FALSE
OG0000164	-69.6155	145.231	-69.3363	150.673	-5.44167	FALSE
OG0000165	-97.2319	200.464	-98.619	209.238	-8.7741	FALSE
OG0000166	-79.3292	164.658	-80.7861	173.572	-8.91381	FALSE
OG0000167	-89.0437	184.087	-93.8487	199.697	-15.61	FALSE
OG0000168	-95.2741	196.548	-97.9685	207.937	-11.3889	FALSE
OG0000169	-106.858	219.716	-124.303	260.606	-40.8895	FALSE
OG0000170	-84.3417	174.683	-89.7445	191.489	-16.8056	FALSE
OG0000171	-94.2516	194.503	-92.3786	196.757	-2.25398	FALSE
OG0000173	-77.5194	161.039	-77.7761	167.552	-6.51337	FALSE
OG0000174	-80.7025	167.405	-79.7002	171.4	-3.9954	FALSE
OG0000175	-96.1172	198.234	-94.5868	201.174	-2.93901	FALSE
OG0000176	-93.08	192.16	-92.6728	197.346	-5.18577	FALSE
OG0000177	-84.7471	175.494	-84.6368	181.274	-5.77929	FALSE
OG0000179	-81.6803	169.361	-83.242	178.484	-9.12343	FALSE
OG0000180	-74.151	154.302	-71.4823	154.965	-0.662566	FALSE
OG0000181	-80.1753	166.351	-76.7197	165.439	0.911199	FALSE
OG0000182	-106.407	218.815	-106.162	224.323	-5.50865	FALSE
OG0000183	-99.5136	205.027	-104.894	221.788	-16.7604	FALSE
OG0000185	-101.88	209.761	-100.899	213.798	-4.0375	FALSE
OG0000186	-95.1331	196.266	-92.6997	197.399	-1.13333	FALSE
OG0000187	-93.2906	192.581	-92.9767	197.953	-5.3721	FALSE
OG0000188	-86.8482	179.696	-85.5256	183.051	-3.35465	FALSE
OG0000189	-91.6905	189.381	-91.2553	194.511	-5.12952	FALSE
OG0000191	-96.5199	199.04	-96.841	205.682	-6.64209	FALSE
OG0000193	-95.6379	197.276	-95.0641	202.128	-4.85235	FALSE
OG0000195	-85.8729	177.746	-85.0031	182.006	-4.26025	FALSE
OG0000197	-87.0471	180.094	-83.3966	178.793	1.30106	FALSE
OG0000198	-92.4704	190.941	-98.853	209.706	-18.7651	FALSE
OG0000200	-91.2972	188.594	-90.9344	193.869	-5.27438	FALSE
OG0000201	-95.666	197.332	-99.8314	211.663	-14.3307	FALSE
OG0000202	-80.6658	167.332	-80.4308	172.862	-5.53014	FALSE
OG0000203	-86.1194	178.239	-83.2511	178.502	-0.263338	FALSE
OG0000204	-99.1731	204.346	-95.4095	202.819	1.52719	FALSE
OG0000205	-83.1434	172.287	-81.7321	175.464	-3.1774	FALSE
OG0000206	-55.5398	117.08	-51.9652	115.93	1.1493	FALSE
OG0000207	-87.9755	181.951	-87.484	186.968	-5.01703	FALSE
OG0000209	-78.3934	162.787	-75.65	163.3	-0.513158	FALSE
OG0000210	-82.3632	170.726	-81.3706	174.741	-4.01464	FALSE
OG0000211	-84.3285	174.657	-84.9703	181.941	-7.28366	FALSE
OG0000212	-86.2425	178.485	-86.287	184.574	-6.08896	FALSE
OG0000213	-92.9497	191.899	-89.744	191.488	0.411505	FALSE
OG0000214	-89.3188	184.638	-95.6258	203.252	-18.6141	FALSE
OG0000215	-87.2625	180.525	-86.1083	184.217	-3.69167	FALSE
OG0000216	-81.7666	169.533	-81.3924	174.785	-5.2516	FALSE
OG0000217	-82.5681	171.136	-81.7169	175.434	-4.29761	FALSE
OG0000218	-95.9981	197.996	-93.3035	198.607	-0.610756	FALSE
OG0000219	-76.1718	158.344	-76.2106	164.421	-6.07748	FALSE
OG0000220	-66.1161	138.232	-66.0578	144.116	-5.88349	FALSE
OG0000221	-86.0026	178.005	-83.8963	179.793	-1.78736	FALSE
OG0000223	-84.6778	175.356	-83.7327	179.465	-4.10963	FALSE
OG0000224	-96.5607	199.121	-95.4293	202.859	-3.73708	FALSE
OG0000225	-81.4348	168.87	-83.8146	179.629	-10.7597	FALSE
OG0000226	-68.9125	143.825	-66.0749	144.15	-0.324734	FALSE
OG0000227	-93.0837	192.167	-92.0794	196.159	-3.99144	FALSE
OG0000228	-97.7677	201.535	-116.059	244.118	-42.5822	FALSE
OG0000229	-97.5696	201.139	-96.445	204.89	-3.75078	FALSE
OG0000230	-81.0126	168.025	-80.4109	172.822	-4.79677	FALSE
OG0000231	-86.6674	179.335	-85.8976	183.795	-4.46037	FALSE
OG0000232	-72.6498	151.3	-72.5994	157.199	-5.89924	FALSE
OG0000233	-89.3913	184.783	-88.7835	189.567	-4.78438	FALSE
OG0000234	-94.0825	194.165	-92.0782	196.156	-1.99145	FALSE
OG0000235	-75.7364	157.473	-78.5463	169.093	-11.6198	FALSE
OG0000236	-86.8069	179.614	-82.9995	177.999	1.61482	FALSE
OG0000237	-91.6648	189.33	-90.1139	192.228	-2.89817	FALSE
OG0000238	-81.8361	169.672	-81.1787	174.357	-4.68513	FALSE
OG0000239	-97.0826	200.165	-93.7345	199.469	0.696198	FALSE
OG0000240	-87.1767	180.353	-87.8214	187.643	-7.28932	FALSE
OG0000241	-76.9184	159.837	-76.991	165.982	-6.14511	FALSE
OG0000242	-84.0971	174.194	-89.1487	190.297	-16.1033	FALSE
OG0000243	-87.6297	181.259	-88.8192	189.638	-8.37891	FALSE
OG0000244	-84.754	175.508	-84.1816	180.363	-4.85516	FALSE
OG0000245	-89.7322	185.464	-89.2514	190.503	-5.03848	FALSE
OG0000246	-30.5452	67.0904	-30.8099	73.6198	-6.52944	FALSE
OG0000247	-91.8145	189.629	-90.1352	192.27	-2.64142	FALSE
OG0000248	-70.7229	147.446	-71.0278	154.056	-6.6099	FALSE
OG0000249	-93.4955	192.991	-91.5935	195.187	-2.19607	FALSE
OG0000250	-81.386	168.772	-82.5566	177.113	-8.34127	FALSE
OG0000251	-75.3718	156.744	-72.6198	157.239	-0.495803	FALSE
OG0000252	-81.1522	168.304	-80.8715	173.743	-5.43875	FALSE
OG0000253	-86.8632	179.726	-86.5234	185.047	-5.32047	FALSE
OG0000254	-52.2091	110.418	-52.15	116.3	-5.88176	FALSE
OG0000255	-89.5518	185.104	-86.9395	185.879	-0.775272	FALSE
OG0000256	-93.7207	193.441	-92.2859	196.572	-3.1304	FALSE
OG0000257	-78.92	163.84	-77.6711	167.342	-3.50221	FALSE
OG0000258	-76.1777	158.355	-76.7763	165.553	-7.19705	FALSE
OG0000259	-83.3538	172.708	-81.5644	175.129	-2.42112	FALSE
OG0000260	-81.8432	169.686	-82.204	176.408	-6.72158	FALSE
OG0000261	-57.416	120.832	-57.5573	127.115	-6.28258	FALSE
OG0000262	-94.7509	195.502	-93.6948	199.39	-3.88782	FALSE
OG0000263	-83.2006	172.401	-82.3715	176.743	-4.34168	FALSE
OG0000264	-70.7125	147.425	-72.5016	157.003	-9.57804	FALSE
OG0000265	-83.2787	172.557	-81.7634	175.527	-2.96942	FALSE
OG0000266	-63.4321	132.864	-62.2756	136.551	-3.6871	FALSE
OG0000267	-75.6103	157.221	-80.3271	172.654	-15.4334	FALSE
OG0000268	-87.7641	181.528	-87.2833	186.567	-5.03843	FALSE
OG0000269	-90.1265	186.253	-88.7154	189.431	-3.17781	FALSE
OG0000271	-86.5853	179.171	-84.8668	181.734	-2.56304	FALSE
OG0000273	-74.4501	154.9	-73.7711	159.542	-4.64209	FALSE
OG0000274	-77.9633	161.927	-74.559	161.118	0.808717	FALSE
OG0000275	-55.9055	117.811	-56.8461	125.692	-7.88121	FALSE
OG0000276	-63.8724	133.745	-60.3468	132.694	1.05128	FALSE
OG0000277	-80.649	167.298	-80.1052	172.21	-4.91238	FALSE
OG0000278	-74.2225	154.445	-75.0452	162.09	-7.64542	FALSE
OG0000279	-95.4266	196.853	-94.8385	201.677	-4.82382	FALSE
OG0000280	-83.4064	172.813	-82.9968	177.994	-5.18083	FALSE
OG0000281	-76.0584	158.117	-75.7169	163.434	-5.31691	FALSE
OG0000282	-75.6548	157.31	-75.5049	163.01	-5.70014	FALSE
OG0000283	-85.3688	176.738	-85.332	182.664	-5.92648	FALSE
OG0000284	-74.8632	155.726	-74.8062	161.612	-5.88605	FALSE
OG0000285	-93.1031	192.206	-92.8102	197.62	-5.41432	FALSE
OG0000286	-77.4248	160.85	-79.9882	171.976	-11.1268	FALSE
OG0000287	-79.5895	165.179	-79.9122	171.824	-6.64553	FALSE
OG0000288	-69.5744	145.149	-66.8153	145.631	-0.481869	FALSE
OG0000289	-60.0444	126.089	-59.944	131.888	-5.79929	FALSE
OG0000290	-82.2168	170.434	-80.8538	173.708	-3.27396	FALSE
OG0000291	-73.844	153.688	-75.2073	162.415	-8.72662	FALSE
OG0000292	-79.575	165.15	-79.3405	170.681	-5.53105	FALSE
OG0000293	-69.0146	144.029	-67.1064	146.213	-2.18363	FALSE
OG0000294	-75.116	156.232	-74.1192	160.238	-4.00629	FALSE
OG0000295	-83.7819	173.564	-81.273	174.546	-0.982213	FALSE
OG0000297	-72.358	150.716	-72.0474	156.095	-5.37887	FALSE
OG0000298	-75.3572	156.714	-74.6572	161.314	-4.60001	FALSE
OG0000299	-87.6284	181.257	-86.5569	185.114	-3.85705	FALSE
OG0000300	-89.8093	185.619	-87.6312	187.262	-1.64378	FALSE
OG0000301	-72.4751	150.95	-71.0813	154.163	-3.21256	FALSE
OG0000302	-90.9012	187.802	-97.8659	207.732	-19.9294	FALSE
OG0000303	-75.3821	156.764	-77.6541	167.308	-10.5441	FALSE
OG0000304	-41.8053	89.6106	-39.3058	90.6117	-1.00104	FALSE
OG0000305	-70.3217	146.643	-69.9163	151.833	-5.18918	FALSE
OG0000306	-79.9251	165.85	-78.1854	168.371	-2.5206	FALSE
OG0000307	-75.7042	157.408	-74.8674	161.735	-4.32645	FALSE
OG0000308	-70.3833	146.767	-69.2057	150.411	-3.64481	FALSE
OG0000309	-67.5006	141.001	-67.278	146.556	-5.5549	FALSE
OG0000310	-73.7416	153.483	-72.5158	157.032	-3.54837	FALSE
OG0000311	-88.4177	182.835	-87.8486	187.697	-4.86176	FALSE
OG0000312	-83.0462	172.092	-81.179	174.358	-2.26558	FALSE
OG0000313	-64.8901	135.78	-61.7324	135.465	0.315303	FALSE
OG0000314	-78.6373	163.275	-76.2034	164.407	-1.13225	FALSE
OG0000315	-72.6223	151.245	-73.5633	159.127	-7.88192	FALSE
OG0000316	-56.149	118.298	-56.421	124.842	-6.54407	FALSE
OG0000318	-81.7601	169.52	-84.4435	180.887	-11.3668	FALSE
OG0000319	-42.2024	90.4048	-39.132	90.2639	0.140861	FALSE
OG0000320	-41.3843	88.7685	-41.9731	95.9462	-7.17764	FALSE
OG0000321	-81.5591	169.118	-82.6449	177.29	-8.17151	FALSE
OG0000322	-92.3432	190.686	-91.2212	194.442	-3.756	FALSE
OG0000323	-83.1591	172.318	-82.7751	177.55	-5.23194	FALSE
OG0000324	-89.5384	185.077	-89.288	190.576	-5.49907	FALSE
OG0000325	-81.2529	168.506	-81.454	174.908	-6.40216	FALSE
OG0000326	-79.5324	165.065	-78.1737	168.347	-3.28258	FALSE
OG0000327	-77.035	160.07	-76.7089	165.418	-5.34777	FALSE
OG0000328	-59.4104	124.821	-59.2413	130.483	-5.66188	FALSE
OG0000329	-78.8797	163.759	-77.8408	167.682	-3.9221	FALSE
OG0000331	-37.5402	81.0805	-36.8618	85.7237	-4.64321	FALSE
OG0000332	-75.7361	157.472	-83.1359	178.272	-20.7997	FALSE
OG0000333	-87.0349	180.07	-84.585	181.17	-1.10014	FALSE
OG0000334	-70.1486	146.297	-69.1655	150.331	-4.03368	FALSE
OG0000336	-80.1948	166.39	-79.7143	171.429	-5.03903	FALSE
OG0000338	-71.0436	148.087	-69.4099	150.82	-2.7326	FALSE
OG0000339	-91.5891	189.178	-98.8669	209.734	-20.5557	FALSE
OG0000340	-76.3826	158.765	-76.2018	164.404	-5.63841	FALSE
OG0000341	-59.1709	124.342	-57.9145	127.829	-3.48732	FALSE
OG0000342	-86.5686	179.137	-83.7776	179.555	-0.418066	FALSE
OG0000343	-84.9137	175.827	-84.626	181.252	-5.42476	FALSE
OG0000344	-83.0562	172.112	-82.2557	176.511	-4.39902	FALSE
OG0000345	-59.3788	124.758	-59.6617	131.323	-6.56585	FALSE
OG0000347	-76.7436	159.487	-77.3376	166.675	-7.1879	FALSE
OG0000348	-77.6237	161.247	-77.0709	166.142	-4.89437	FALSE
OG0000349	-68.0023	142.005	-68.0172	148.034	-6.0298	FALSE
OG0000350	-66.6584	139.317	-66.7586	145.517	-6.20037	FALSE
OG0000351	-71.1857	148.371	-69.7522	151.504	-3.13308	FALSE
OG0000352	-82.4089	170.818	-81.9954	175.991	-5.17302	FALSE
OG0000353	-89.5795	185.159	-91.4712	194.942	-9.7833	FALSE
OG0000354	-87.5601	181.12	-86.2623	184.525	-3.40444	FALSE
OG0000356	-68.925	143.85	-68.8788	149.758	-5.90755	FALSE
OG0000357	-86.3225	178.645	-85.0003	182.001	-3.35557	FALSE
OG0000358	-70.9581	147.916	-70.2595	152.519	-4.60276	FALSE
OG0000359	-42.5767	91.1534	-48.8471	109.694	-18.5409	FALSE
OG0000360	-82.7361	171.472	-82.4578	176.916	-5.44342	FALSE
OG0000361	-88.0844	182.169	-85.8003	183.601	-1.43164	FALSE
OG0000362	-72.9907	151.981	-73.307	158.614	-6.63268	FALSE
OG0000363	-69.6818	145.364	-71.0201	154.04	-8.67658	FALSE
OG0000365	-78.5314	163.063	-91.4267	194.853	-31.7906	FALSE
OG0000366	-65.8179	137.636	-65.5002	143	-5.36449	FALSE
OG0000367	-75.4244	156.849	-74.7217	161.443	-4.59442	FALSE
OG0000368	-75.9558	157.912	-74.9765	161.953	-4.04146	FALSE
OG0000369	-83.5235	173.047	-83.0553	178.111	-5.06369	FALSE
OG0000370	-89.2582	184.516	-89.5991	191.198	-6.68183	FALSE
OG0000371	-73.5731	153.146	-73.8034	159.607	-6.46047	FALSE
OG0000372	-89.7192	185.438	-87.007	186.014	-0.575699	FALSE
OG0000373	-82.4285	170.857	-80.4208	172.842	-1.98459	FALSE
OG0000374	-65.9216	137.843	-64.5166	141.033	-3.19003	FALSE
OG0000375	-68.9833	143.967	-65.7241	143.448	0.51824	FALSE
OG0000376	-75.7735	157.547	-73.6979	159.396	-1.84878	FALSE
OG0000377	-85.2257	176.451	-85.2178	182.436	-5.98412	FALSE
OG0000378	-54.9846	115.969	-54.0205	120.041	-4.07174	FALSE
OG0000379	-65.0529	136.106	-64.8828	141.766	-5.65983	FALSE
OG0000380	-73.1399	152.28	-74.7339	161.468	-9.18799	FALSE
OG0000381	-86.2377	178.475	-83.968	179.936	-1.46048	FALSE
OG0000382	-82.8856	171.771	-85.3222	182.644	-10.8732	FALSE
OG0000383	-79.9461	165.892	-79.0772	170.154	-4.26226	FALSE
OG0000384	-85.1432	176.286	-83.066	178.132	-1.84554	FALSE
OG0000385	-64.739	135.478	-64.5211	141.042	-5.56434	FALSE
OG0000386	-81.8864	169.773	-79.195	170.39	-0.617195	FALSE
OG0000387	-61.0058	128.012	-58.4817	128.963	-0.951679	FALSE
OG0000388	-70.8498	147.7	-71.751	155.502	-7.80233	FALSE
OG0000389	-68.3692	142.738	-68.9648	149.93	-7.19115	FALSE
OG0000390	-46.6961	99.3921	-45.6361	103.272	-3.88001	FALSE
OG0000391	-73.1762	152.352	-69.8361	151.672	0.680329	FALSE
OG0000393	-78.9303	163.861	-78.4371	168.874	-5.01368	FALSE
OG0000395	-85.3774	176.755	-82.8577	177.715	-0.960538	FALSE
OG0000396	-75.0093	156.019	-75.1057	162.211	-6.1928	FALSE
OG0000397	-55.3519	116.704	-53.4846	118.969	-2.26524	FALSE
OG0000398	-85.844	177.688	-92.6008	197.202	-19.5136	FALSE
OG0000399	-88.0569	182.114	-87.1217	186.243	-4.12956	FALSE
OG0000400	-71.3548	148.71	-71.9717	155.943	-7.23384	FALSE
OG0000401	-77.0533	160.107	-77.049	166.098	-5.99151	FALSE
OG0000402	-61.0084	128.017	-59.6009	131.202	-3.18501	FALSE
OG0000403	-72.4383	150.877	-73.583	159.166	-8.28952	FALSE
OG0000404	-86.8957	179.791	-89.3276	190.655	-10.8638	FALSE
OG0000405	-66.3758	138.752	-67.0005	146.001	-7.24938	FALSE
OG0000406	-76.4995	158.999	-75.0732	162.146	-3.14739	FALSE
OG0000407	-69.9934	145.987	-70.9899	153.98	-7.99296	FALSE
OG0000408	-69.4717	144.943	-74.7931	161.586	-16.6428	FALSE
OG0000409	-77.9774	161.955	-77.6493	167.299	-5.34391	FALSE
OG0000410	-80.3464	166.693	-81.3481	174.696	-8.00329	FALSE
OG0000411	-76.6722	159.344	-75.1588	162.318	-2.97308	FALSE
OG0000412	-66.5041	139.008	-66.4576	144.915	-5.90702	FALSE
OG0000413	-86.6946	179.389	-90.237	192.474	-13.0847	FALSE
OG0000414	-81.443	168.886	-84.3	180.6	-11.7141	FALSE
OG0000415	-76.1796	158.359	-75.53	163.06	-4.70073	FALSE
OG0000416	-81.9027	169.805	-81.4485	174.897	-5.09152	FALSE
OG0000417	-81.5073	169.015	-80.2939	172.588	-3.57317	FALSE
OG0000418	-61.21	128.42	-60.0565	132.113	-3.69286	FALSE
OG0000419	-75.3794	156.759	-75.2454	162.491	-5.73183	FALSE
OG0000420	-75.5651	157.13	-77.5711	167.142	-10.0118	FALSE
OG0000421	-78.2182	162.436	-78.9083	169.817	-7.3803	FALSE
OG0000422	-80.628	167.256	-83.2686	178.537	-11.2812	FALSE
OG0000423	-77.4505	160.901	-76.8285	165.657	-4.7559	FALSE
OG0000424	-75.2969	156.594	-73.1775	158.355	-1.76133	FALSE
OG0000425	-79.3471	164.694	-77.1569	166.314	-1.6197	FALSE
OG0000426	-69.6797	145.359	-70.349	152.698	-7.33869	FALSE
OG0000428	-80.2529	166.506	-79.728	171.456	-4.95022	FALSE
OG0000429	-77.5597	161.119	-76.0601	164.12	-3.00095	FALSE
OG0000430	-68.0929	142.186	-65.0735	142.147	0.0387036	FALSE
OG0000431	-63.6837	133.367	-63.4212	138.842	-5.47507	FALSE
OG0000432	-78.9258	163.852	-76.8194	165.639	-1.78716	FALSE
OG0000434	-65.1873	136.375	-65.3354	142.671	-6.29615	FALSE
OG0000435	-80.1939	166.388	-80.2699	172.54	-6.15203	FALSE
OG0000436	-72.046	150.092	-71.5245	155.049	-4.95688	FALSE
OG0000437	-62.8247	131.649	-59.6456	131.291	0.358246	FALSE
OG0000438	-65.8802	137.76	-66.088	144.176	-6.41567	FALSE
OG0000439	-64.9665	135.933	-67.6627	147.325	-11.3923	FALSE
OG0000440	-79.7277	165.455	-77.2979	166.596	-1.14052	FALSE
OG0000441	-68.9553	143.911	-68.0913	148.183	-4.27208	FALSE
OG0000442	-83.1302	172.26	-82.9491	177.898	-5.63782	FALSE
OG0000443	-64.195	134.39	-62.8732	137.746	-3.35651	FALSE
OG0000444	-69.6509	145.302	-78.532	169.064	-23.7622	FALSE
OG0000445	-78.3559	162.712	-77.4076	166.815	-4.10342	FALSE
OG0000446	-83.1109	172.222	-82.5713	177.143	-4.92068	FALSE
OG0000447	-83.7239	173.448	-83.1347	178.269	-4.82166	FALSE
OG0000448	-59.2492	124.498	-58.9624	129.925	-5.42626	FALSE
OG0000449	-72.3963	150.793	-72.2919	156.584	-5.79102	FALSE
OG0000450	-79.0916	164.183	-88.1265	188.253	-24.0699	FALSE
OG0000451	-72.0379	150.076	-71.3373	154.675	-4.59881	FALSE
OG0000452	-53.9239	113.848	-53.7493	119.499	-5.65071	FALSE
OG0000453	-73.0618	152.124	-72.9217	157.843	-5.71973	FALSE
OG0000454	-74.6204	155.241	-74.5682	161.136	-5.89559	FALSE
OG0000455	-60.5134	127.027	-59.7902	131.58	-4.55357	FALSE
OG0000456	-86.7484	179.497	-85.919	183.838	-4.34116	FALSE
OG0000458	-76.2983	158.597	-80.7218	173.444	-14.8469	FALSE
OG0000460	-73.3669	152.734	-73.035	158.07	-5.33622	FALSE
OG0000461	-76.3269	158.654	-75.5829	163.166	-4.51199	FALSE
OG0000462	-66.621	139.242	-67.166	146.332	-7.09	FALSE
OG0000463	-67.0991	140.198	-66.0171	144.034	-3.83591	FALSE
OG0000464	-80.5376	167.075	-79.4087	170.817	-3.74221	FALSE
OG0000465	-78.7197	163.439	-78.7638	169.528	-6.08801	FALSE
OG0000466	-78.6445	163.289	-77.6563	167.313	-4.02368	FALSE
OG0000468	-68.9488	143.898	-67.9277	147.855	-3.95775	FALSE
OG0000469	-74.3024	154.605	-74.1828	160.366	-5.7609	FALSE
OG0000470	-66.3576	138.715	-66.4901	144.98	-6.26504	FALSE
OG0000472	-57.5687	121.137	-56.7375	125.475	-4.33772	FALSE
OG0000473	-73.6435	153.287	-73.3217	158.643	-5.35645	FALSE
OG0000474	-74.4856	154.971	-70.8166	153.633	1.33812	FALSE
OG0000475	-71.8716	149.743	-71.4171	154.834	-5.09115	FALSE
OG0000476	-43.5357	93.0714	-45.1475	102.295	-9.2235	FALSE
OG0000477	-78.7139	163.428	-76.8556	165.711	-2.28349	FALSE
OG0000478	-61.881	129.762	-61.2992	134.598	-4.8365	FALSE
OG0000479	-79.5176	165.035	-79.2647	170.529	-5.49417	FALSE
OG0000480	-74.751	155.502	-73.9648	159.93	-4.42755	FALSE
OG0000481	-65.7748	137.55	-65.6154	143.231	-5.68124	FALSE
OG0000482	-68.7631	143.526	-68.0798	148.16	-4.63332	FALSE
OG0000483	-75.1183	156.237	-78.6143	169.229	-12.9921	FALSE
OG0000484	-70.961	147.922	-71.1704	154.341	-6.41895	FALSE
OG0000485	-45.9279	97.8557	-44.7913	101.583	-3.72678	FALSE
OG0000486	-80.0211	166.042	-80.0071	172.014	-5.97195	FALSE
OG0000487	-58.8882	123.776	-59.3149	130.63	-6.85348	FALSE
OG0000488	-73.008	152.016	-72.4535	156.907	-4.89093	FALSE
OG0000489	-76.5856	159.171	-76.4384	164.877	-5.70564	FALSE
OG0000490	-70.4396	146.879	-68.9414	149.883	-3.00364	FALSE
OG0000491	-66.2329	138.466	-64.8353	141.671	-3.20477	FALSE
OG0000492	-54.6945	115.389	-55.3602	122.72	-7.33133	FALSE
OG0000493	-77.1505	160.301	-75.5319	163.064	-2.7627	FALSE
OG0000494	-83.7769	173.554	-82.0646	176.129	-2.57536	FALSE
OG0000495	-70.1172	146.234	-69.862	151.724	-5.48962	FALSE
OG0000496	-80.2695	166.539	-80.207	172.414	-5.87487	FALSE
OG0000497	-78.2007	162.401	-77.6795	167.359	-4.95752	FALSE
OG0000498	-62.7907	131.581	-62.6326	137.265	-5.68375	FALSE
OG0000499	-68.1408	142.282	-67.6243	147.249	-4.96686	FALSE
OG0000501	-74.5	155	-72.0384	156.077	-1.07675	FALSE
OG0000502	-77.5084	161.017	-77.3127	166.625	-5.60864	FALSE
OG0000503	-74.4501	154.9	-74.0779	160.156	-5.25572	FALSE
OG0000504	-80.6252	167.25	-79.499	170.998	-3.74759	FALSE
OG0000505	-79.419	164.838	-79.4678	170.936	-6.09754	FALSE
OG0000506	-70.4796	146.959	-68.1725	148.345	-1.38563	FALSE
OG0000507	-75.9213	157.843	-75.338	162.676	-4.83339	FALSE
OG0000508	-70.9906	147.981	-69.9294	151.859	-3.87745	FALSE
OG0000509	-77.0664	160.133	-75.6692	163.338	-3.20551	FALSE
OG0000511	-73.6176	153.235	-72.0138	156.028	-2.79242	FALSE
OG0000512	-83.6439	173.288	-81.5653	175.131	-1.84281	FALSE
OG0000513	-67.465	140.93	-64.4444	140.889	0.0413831	FALSE
OG0000514	-78.3843	162.769	-76.0081	164.016	-1.24759	FALSE
OG0000515	-75.6398	157.28	-73.6419	159.284	-2.00411	FALSE
OG0000516	-79.0854	164.171	-75.152	162.304	1.86692	FALSE
OG0000518	-72.5073	151.015	-72.8644	157.729	-6.71418	FALSE
OG0000519	-76.8224	159.645	-76.2849	164.57	-4.92487	FALSE
OG0000520	-74.6794	155.359	-74.3692	160.738	-5.37952	FALSE
OG0000521	-76.7732	159.546	-76.3466	164.693	-5.14686	FALSE
OG0000522	-44.5195	95.039	-43.3082	98.6165	-3.57747	FALSE
OG0000523	-80.1596	166.319	-79.356	170.712	-4.39281	FALSE
OG0000524	-77.9015	161.803	-77.4415	166.883	-5.07992	FALSE
OG0000525	-65.6991	137.398	-65.3725	142.745	-5.34687	FALSE
OG0000526	-74.6381	155.276	-73.8935	159.787	-4.51098	FALSE
OG0000527	-58.3498	122.7	-55.5604	123.121	-0.421332	FALSE
OG0000528	-49.6776	105.355	-46.5184	105.037	0.318299	FALSE
OG0000529	-67.7524	141.505	-65.5101	143.02	-1.51542	FALSE
OG0000530	-80.9921	167.984	-81.3276	174.655	-6.67106	FALSE
OG0000531	-73.1366	152.273	-71.5525	155.105	-2.83181	FALSE
OG0000532	-83.0787	172.157	-81.0222	174.044	-1.88705	FALSE
OG0000533	-71.6375	149.275	-71.2024	154.405	-5.12994	FALSE
OG0000534	-71.3304	148.661	-70.4449	152.89	-4.22891	FALSE
OG0000535	-83.9805	173.961	-83.5371	179.074	-5.11313	FALSE
OG0000536	-57.9301	121.86	-57.087	126.174	-4.31386	FALSE
OG0000537	-73.9776	153.955	-73.5832	159.166	-5.21136	FALSE
OG0000538	-82.4412	170.882	-83.2237	178.447	-7.56504	FALSE
OG0000539	-68.6858	143.372	-68.8168	149.634	-6.26208	FALSE
OG0000540	-77.7538	161.508	-77.4263	166.853	-5.34509	FALSE
OG0000541	-84.229	174.458	-83.0451	178.09	-3.63229	FALSE
OG0000542	-66.7933	139.587	-67.5598	147.12	-7.53293	FALSE
OG0000543	-52.7153	111.431	-53.9673	119.935	-8.50405	FALSE
OG0000544	-75.393	156.786	-74.7581	161.516	-4.73017	FALSE
OG0000545	-81.0066	168.013	-80.6048	173.21	-5.19647	FALSE
OG0000546	-70.9511	147.902	-70.1815	152.363	-4.46092	FALSE
OG0000547	-73.303	152.606	-72.6374	157.275	-4.66887	FALSE
OG0000548	-57.8638	121.728	-55.4343	122.869	-1.14092	FALSE
OG0000549	-78.7491	163.498	-76.8083	165.617	-2.11841	FALSE
OG0000550	-62.4812	130.962	-63.4829	138.966	-8.00342	FALSE
OG0000552	-78.9836	163.967	-77.946	167.892	-3.92473	FALSE
OG0000553	-50.9488	107.898	-50.8114	113.623	-5.72503	FALSE
OG0000554	-77.3336	160.667	-76.3371	164.674	-4.00702	FALSE
OG0000556	-72.5437	151.087	-73.4569	158.914	-7.82658	FALSE
OG0000557	-71.3256	148.651	-68.0461	148.092	0.558918	FALSE
OG0000558	-76.9561	159.912	-75.6303	163.261	-3.34851	FALSE
OG0000559	-43.9786	93.9571	-43.7461	99.4922	-5.53506	FALSE
OG0000560	-73.8607	153.721	-73.9666	159.933	-6.21181	FALSE
OG0000561	-67.6252	141.25	-67.6252	147.25	-5.99986	FALSE
OG0000562	-60.5851	127.17	-59.9039	131.808	-4.6377	FALSE
OG0000563	-78.6413	163.283	-76.2948	164.59	-1.3071	FALSE
OG0000564	-74.1076	154.215	-73.6442	159.288	-5.07332	FALSE
OG0000565	-73.9995	153.999	-73.5148	159.03	-5.03059	FALSE
OG0000566	-66.5885	139.177	-66.7936	145.587	-6.41019	FALSE
OG0000567	-68.0521	142.104	-67.9271	147.854	-5.74996	FALSE
OG0000568	-78.8406	163.681	-78.5972	169.194	-5.5131	FALSE
OG0000569	-63.8742	133.748	-67.6192	147.238	-13.4901	FALSE
OG0000570	-69.6126	145.225	-69.3222	150.644	-5.41922	FALSE
OG0000571	-66.4544	138.909	-65.1784	142.357	-3.44791	FALSE
OG0000572	-73.0797	152.159	-71.7098	155.42	-3.26027	FALSE
OG0000573	-69.5582	145.116	-69.8641	151.728	-6.61175	FALSE
OG0000574	-64.9809	135.962	-63.8023	139.605	-3.64284	FALSE
OG0000575	-70.5533	147.107	-68.338	148.676	-1.56945	FALSE
OG0000576	-62.528	131.056	-62.8832	137.766	-6.71055	FALSE
OG0000578	-79.5046	165.009	-78.8289	169.658	-4.64847	FALSE
OG0000579	-11.1959	28.3918	-11.6454	35.2908	-6.89899	FALSE
OG0000580	-69.5544	145.109	-69.1066	150.213	-5.10452	FALSE
OG0000581	-60.1921	126.384	-58.8719	129.744	-3.3597	FALSE
OG0000582	-51.2349	108.47	-52.3323	116.665	-8.19476	FALSE
OG0000583	-79.0313	164.063	-78.5438	169.088	-5.02489	FALSE
OG0000584	-82.021	170.042	-80.4323	172.865	-2.82263	FALSE
OG0000585	-82.7636	171.527	-80.0253	172.051	-0.523287	FALSE
OG0000586	-62.6285	131.257	-62.5967	137.193	-5.93651	FALSE
OG0000588	-72.8269	151.654	-71.9573	155.915	-4.26076	FALSE
OG0000589	-70.7464	147.493	-68.8763	149.753	-2.25972	FALSE
OG0000590	-77.7816	161.563	-77.5742	167.148	-5.58526	FALSE
OG0000591	-75.6589	157.318	-75.6257	163.251	-5.93358	FALSE
OG0000592	-60.5352	127.07	-57.2961	126.592	0.478228	FALSE
OG0000593	-75.7728	157.546	-75.7258	163.452	-5.90611	FALSE
OG0000594	-49.6648	105.33	-50.2118	112.424	-7.09391	FALSE
OG0000595	-69.3926	144.785	-69.6351	151.27	-6.48504	FALSE
OG0000596	-74.731	155.462	-74.2972	160.594	-5.1324	FALSE
OG0000597	-48.5881	103.176	-46.9402	105.88	-2.70407	FALSE
OG0000598	-71.134	148.268	-70.1419	152.284	-4.01582	FALSE
OG0000599	-52.6392	111.278	-52.7885	117.577	-6.29869	FALSE
OG0000600	-73.6883	153.377	-73.3089	158.618	-5.24104	FALSE
OG0000601	-65.4899	136.98	-65.1618	142.324	-5.34383	FALSE
OG0000602	-63.6628	133.326	-63.5662	139.132	-5.80675	FALSE
OG0000603	-82.9883	171.977	-82.3923	176.785	-4.80805	FALSE
OG0000604	-59.5052	125.01	-57.7335	127.467	-2.45666	FALSE
OG0000606	-74.2802	154.56	-71.4729	154.946	-0.38533	FALSE
OG0000607	-82.8845	171.769	-79.7001	171.4	0.368822	FALSE
OG0000608	-52.2493	110.499	-58.4993	128.999	-18.5	FALSE
OG0000610	-77.2842	160.568	-76.4758	164.952	-4.38317	FALSE
OG0000611	-71.8069	149.614	-74.0462	160.092	-10.4787	FALSE
OG0000612	-73.2449	152.49	-72.7099	157.42	-4.93004	FALSE
OG0000613	-74.2023	154.405	-73.8769	159.754	-5.34918	FALSE
OG0000614	-72.6193	151.239	-69.9392	151.878	-0.639837	FALSE
OG0000615	-76.254	158.508	-75.3784	162.757	-4.24885	FALSE
OG0000616	-60.5967	127.193	-58.8943	129.789	-2.59523	FALSE
OG0000617	-65.353	136.706	-64.6665	141.333	-4.62698	FALSE
OG0000619	-62.8717	131.743	-61.5416	135.083	-3.33994	FALSE
OG0000621	-70.9178	147.836	-71.3325	154.665	-6.82937	FALSE
OG0000622	-81.3448	168.69	-80.7437	173.487	-4.7978	FALSE
OG0000623	-38.9164	83.8329	-37.2646	86.5291	-2.69624	FALSE
OG0000624	-64.1552	134.31	-63.5954	139.191	-4.88034	FALSE
OG0000625	-71.9909	149.982	-71.1576	154.315	-4.33356	FALSE
OG0000626	-60.1671	126.334	-60.0824	132.165	-5.83068	FALSE
OG0000628	-49.4678	104.936	-47.8431	107.686	-2.75049	FALSE
OG0000629	-70.073	146.146	-77.7565	167.513	-21.367	FALSE
OG0000630	-67.8394	141.679	-66.2939	144.588	-2.90897	FALSE
OG0000631	-68.1257	142.251	-67.3948	146.79	-4.53814	FALSE
OG0000632	-52.2344	110.469	-49.6794	111.359	-0.890055	FALSE
OG0000633	-70.2355	146.471	-69.0699	150.14	-3.66871	FALSE
OG0000635	-72.2801	150.56	-69.7175	151.435	-0.874906	FALSE
OG0000636	-67.632	141.264	-65.161	142.322	-1.05795	FALSE
OG0000637	-73.3412	152.682	-72.4169	156.834	-4.15135	FALSE
OG0000638	-72.7066	151.413	-72.8682	157.736	-6.32309	FALSE
OG0000639	-78.8261	163.652	-77.3009	166.602	-2.94956	FALSE
OG0000640	-77.4237	160.847	-75.7631	163.526	-2.67887	FALSE
OG0000641	-82.1923	170.385	-82.9418	177.884	-7.49896	FALSE
OG0000642	-45.7687	97.5374	-44.8199	101.64	-4.10243	FALSE
OG0000643	-73.407	152.814	-73.0227	158.045	-5.23138	FALSE
OG0000644	-46.3049	98.6097	-43.7561	99.5121	-0.902407	FALSE
OG0000645	-51.379	108.758	-48.1713	108.343	0.41549	FALSE
OG0000649	-74.5174	155.035	-73.0578	158.116	-3.08079	FALSE
OG0000650	-68.1541	142.308	-67.512	147.024	-4.71587	FALSE
OG0000651	-70.9542	147.908	-73.6523	159.305	-11.3964	FALSE
OG0000652	-73.4812	152.962	-73.2414	158.483	-5.5204	FALSE
OG0000654	-62.6013	131.203	-62.6411	137.282	-6.07958	FALSE
OG0000656	-76.6709	159.342	-75.1784	162.357	-3.01491	FALSE
OG0000657	-77.7671	161.534	-77.0268	166.054	-4.51949	FALSE
OG0000658	-69.2876	144.575	-67.4798	146.96	-2.38443	FALSE
OG0000660	-53.9341	113.868	-51.3406	114.681	-0.813049	FALSE
OG0000661	-79.1437	164.287	-76.4553	164.911	-0.623297	FALSE
OG0000662	-61.7987	129.597	-59.6582	131.316	-1.71903	FALSE
OG0000663	-67.5696	141.139	-66.4283	144.857	-3.71756	FALSE
OG0000664	-71.4983	148.997	-68.8377	149.675	-0.678869	FALSE
OG0000665	-69.5195	145.039	-70.1836	152.367	-7.3283	FALSE
OG0000666	-72.9733	151.947	-75.8557	163.711	-11.7647	FALSE
[truncated: 12,989 more rows]

## Sheet: Aquatic lineage analysis (AR)
Orthogroup	GR likelihood	GR AIC (K=3)	AR likelihood	AR AIC (K=6)	GR-AR	AR better-fitting than GR? = 225 OGs	net rate in AR (BIRTH-DEATH)	Expanded or Contracted?	net rate in AR background (BIRTH-DEATH)	net rate AR - net rate TR background	More than background?
OG0000006	-38.8453	83.6906	-33.343	78.6861	5.00449	TRUE	8.51818	EXPANDED	2.3187	6.19948	TRUE
OG0000010	-38.7589	83.5179	-33.0933	78.1866	5.33126	TRUE	9.49924	EXPANDED	-1.30217	10.8014	TRUE
OG0000012	-27.4112	60.8225	-18.4192	48.8383	11.9841	TRUE	4.56299	EXPANDED	-0.078617	4.64161	TRUE
OG0000018	-34.3057	74.6115	-28.6942	69.3884	5.22311	TRUE	0.39683	EXPANDED	1.54056	-1.14373	FALSE
OG0000020	-27.5452	61.0905	-21.1152	54.2304	6.86005	TRUE	3.38951	EXPANDED	-0.805621	4.19513	TRUE
OG0000041	-45.5699	97.1398	-37.2026	86.4052	10.7346	TRUE	7.6534	EXPANDED	3.68575	3.96765	TRUE
OG0000049	-26.394	58.788	-20.5098	53.0195	5.76843	TRUE	0.840165	EXPANDED	-0.677184	1.51735	TRUE
OG0000051	-30.0676	66.1351	-24.6151	61.2303	4.90482	TRUE	0.974387	EXPANDED	2.11213	-1.13774	FALSE
OG0000061	-42.7044	91.4088	-38.0022	88.0044	3.40433	TRUE	8.75255	EXPANDED	4.97342	3.77913	TRUE
OG0000096	-29.1068	64.2137	-20.4961	52.9921	11.2216	TRUE	10.7902	EXPANDED	-0.939752	11.73	TRUE
OG0000102	-42.4524	90.9049	-34.3843	80.7686	10.1363	TRUE	3.09695	EXPANDED	1.9394	1.15755	TRUE
OG0000129	-23.4461	52.8923	-17.3488	46.6975	6.19474	TRUE	4.1479	EXPANDED	-0.767002	4.9149	TRUE
OG0000172	-32.0471	70.0942	-27.5484	67.0968	2.99742	TRUE	4.48092	EXPANDED	0.729155	3.75177	TRUE
OG0000206	-39.4035	84.8071	-31.8656	75.7313	9.07579	TRUE	6.61895	EXPANDED	0.868083	5.75087	TRUE
OG0000208	-39.3697	84.7394	-31.8815	75.7629	8.9765	TRUE	11.8107	EXPANDED	-0.837114	12.6478	TRUE
OG0000224	-21.8803	49.7606	-17.5058	47.0115	2.74911	TRUE	7.3732	EXPANDED	-0.941742	8.31494	TRUE
OG0000242	-19.9108	45.8216	-14.4388	40.8776	4.94396	TRUE	2.2569	EXPANDED	-0.792981	3.04988	TRUE
OG0000274	-24.8154	55.6307	-19.6532	51.3065	4.32424	TRUE	4.24109	EXPANDED	-0.731113	4.9722	TRUE
OG0000318	-27.4317	60.8633	-20.3852	52.7703	8.09298	TRUE	1.77786	EXPANDED	-0.87041	2.64827	TRUE
OG0000363	-14.9499	35.8998	-10.6395	33.279	2.62081	TRUE	1.2094	EXPANDED	-0.535554	1.74495	TRUE
OG0000427	-13.7937	33.5875	-8.00545	28.0109	5.57659	TRUE	20.0024	EXPANDED	-0.938863	20.9413	TRUE
OG0000516	-18.7321	43.4643	-14.5069	41.0138	2.4505	TRUE	1.86288	EXPANDED	-0.860715	2.72359	TRUE
OG0000541	-17.2582	40.5165	-13.157	38.314	2.2025	TRUE	11.4618	EXPANDED	57.407	-45.9452	FALSE
OG0000611	-21.5371	49.0742	-17.3521	46.7043	2.36993	TRUE	2.09446	EXPANDED	1.89681	0.19765	TRUE
OG0000622	-20.5121	47.0241	-16.0609	44.1219	2.90227	TRUE	4.50581	EXPANDED	-0.894848	5.40066	TRUE
OG0000658	-23.086	52.172	-17.7437	47.4874	4.68464	TRUE	4.15299	EXPANDED	-0.874084	5.02707	TRUE
OG0000672	-21.7799	49.5597	-17.6922	47.3843	2.17541	TRUE	7.9844	EXPANDED	-0.927001	8.9114	TRUE
OG0000729	-16.7224	39.4448	-12.5996	37.1992	2.24562	TRUE	19.1547	EXPANDED	50.9914	-31.8367	FALSE
OG0000875	-20.6712	47.3423	-13.9299	39.8598	7.48252	TRUE	4.03954	EXPANDED	-0.827028	4.86657	TRUE
OG0000980	-15.8662	37.7325	-10.893	33.786	3.94645	TRUE	2.30011	EXPANDED	-0.0518391	2.35195	TRUE
OG0001102	-21.9209	49.8418	-16.275	44.55	5.29179	TRUE	1.47678	EXPANDED	-0.8991	2.37588	TRUE
OG0001119	-19.2164	44.4327	-14.994	41.9881	2.44464	TRUE	1.88501	EXPANDED	-2.59483	4.47984	TRUE
OG0001252	-22.7601	51.5202	-17.7865	47.5731	3.94717	TRUE	8.09425	EXPANDED	-0.869201	8.96345	TRUE
OG0001274	-27.6531	61.3062	-21.0368	54.0736	7.2326	TRUE	2.86551	EXPANDED	-0.947242	3.81275	TRUE
OG0001279	-11.9579	29.9158	-7.504	27.008	2.90779	TRUE	3.47539	EXPANDED	1.70002	1.77537	TRUE
OG0001291	-21.8969	49.7937	-17.6568	47.3136	2.48011	TRUE	2.4559	EXPANDED	-0.855376	3.31128	TRUE
OG0001605	-20.2048	46.4096	-15.9497	43.8994	2.51022	TRUE	1.90876	EXPANDED	-0.850421	2.75918	TRUE
OG0001692	-12.9432	31.8864	-7.55852	27.117	4.76932	TRUE	17.016	EXPANDED	-0.934913	17.9509	TRUE
OG0001819	-19.2976	44.5953	-13.8525	39.705	4.89027	TRUE	7.22207	EXPANDED	-0.906696	8.12877	TRUE
OG0001988	-17.7412	41.4824	-13.2467	38.4934	2.98906	TRUE	7.20549	EXPANDED	-0.978558	8.18405	TRUE
OG0001990	-17.4168	40.8335	-12.9614	37.9228	2.91067	TRUE	6.47212	EXPANDED	-0.910585	7.38271	TRUE
OG0002172	-16.8724	39.7448	-12.6499	37.2999	2.44491	TRUE	3.25032	EXPANDED	-0.901104	4.15142	TRUE
OG0002309	-17.7412	41.4824	-13.2467	38.4934	2.98906	TRUE	7.20549	EXPANDED	-0.978558	8.18405	TRUE
OG0005299	-19.2597	44.5195	-15.1179	42.2359	2.28358	TRUE	4.7757	EXPANDED	-0.920113	5.69581	TRUE
OG0005660	-26.1424	58.2848	-18.7356	49.4712	8.8136	TRUE	0.0012654	EXPANDED	19.5626	-19.5613	FALSE
OG0009597	-12.0898	30.1795	-7.56716	27.1343	3.04522	TRUE	4.72125	EXPANDED	1.71684	3.00441	TRUE
OG0010288	-15.9636	37.9272	-10.4101	32.8201	5.1071	TRUE	0.237189	EXPANDED	-0.67877	0.915959	TRUE
OG0000003	-36.5914	79.1827	-30.4041	72.8082	6.37453	TRUE	-0.624192	CONTRACTED	0.741549	-1.36574	TRUE
OG0000007	-30.7111	67.4222	-23.497	58.9939	8.42833	TRUE	-107.184	CONTRACTED	-18.7444	-88.4396	TRUE
OG0000009	-31.9666	69.9333	-24.9243	61.8486	8.08463	TRUE	-1.42409	CONTRACTED	0.619475	-2.04357	TRUE
OG0000014	-31.0649	68.1297	-22.4278	56.8557	11.2741	TRUE	-0.545893	CONTRACTED	-0.0280434	-0.51785	TRUE
OG0000054	-23.9283	53.8566	-17.8725	47.745	6.11163	TRUE	-3.06903	CONTRACTED	-0.707957	-2.36107	TRUE
OG0000059	-21.3962	48.7925	-16.6826	45.3651	3.42734	TRUE	-1.95586	CONTRACTED	-0.547933	-1.40793	TRUE
OG0000062	-27.8006	61.6011	-21.7569	55.5138	6.08727	TRUE	-1.97074	CONTRACTED	-13.0634	11.0927	FALSE
OG0000067	-27.8704	61.7408	-20.4867	52.9733	8.76743	TRUE	-1788.84	CONTRACTED	-11.4936	-1777.35	TRUE
OG0000072	-21.0924	48.1848	-14.7098	41.4196	6.76526	TRUE	-10.0422	CONTRACTED	-6.93e-05	-10.0421	TRUE
OG0000077	-34.0987	74.1975	-29.1446	70.2892	3.90827	TRUE	-2.48874	CONTRACTED	3.72311	-6.21185	TRUE
OG0000088	-24.7897	55.5795	-20.5405	53.081	2.49851	TRUE	-5.56085	CONTRACTED	1.73195	-7.2928	TRUE
OG0000090	-24.4664	54.9328	-19.7937	51.5874	3.34539	TRUE	-2.04234	CONTRACTED	-0.728581	-1.31376	TRUE
OG0000093	-20.6478	47.2956	-16.6241	45.2482	2.04737	TRUE	-4.93678	CONTRACTED	-1.86981	-3.06697	TRUE
OG0000100	-30.1401	66.2802	-24.0012	60.0024	6.27782	TRUE	-4.4193	CONTRACTED	2.04255	-6.46185	TRUE
OG0000116	-19.6497	45.2994	-14.2801	40.5602	4.73916	TRUE	-1.24e-05	CONTRACTED	10.4345	-10.4345	TRUE
OG0000127	-25.8965	57.793	-19.8696	51.7393	6.05373	TRUE	-4.60845	CONTRACTED	-1.20052	-3.40793	TRUE
OG0000156	-30.9268	67.8537	-21.0384	54.0768	13.7769	TRUE	-48.5962	CONTRACTED	-147.32	98.7238	FALSE
OG0000165	-25.7825	57.5649	-21.2708	54.5416	3.02338	TRUE	-164974	CONTRACTED	-99396.7	-65577.3	TRUE
OG0000198	-23.3202	52.6405	-18.9091	49.8181	2.82236	TRUE	-113.338	CONTRACTED	-22.8819	-90.4561	TRUE
OG0000214	-25.8535	57.7069	-21.7954	55.5909	2.11604	TRUE	-5.00879	CONTRACTED	2.38747	-7.39626	TRUE
OG0000217	-22.8257	51.6514	-15.8208	43.6415	8.00991	TRUE	-7.27689	CONTRACTED	1.19235	-8.46924	TRUE
OG0000222	-20.1888	46.3775	-15.3368	42.6736	3.70393	TRUE	-7.05528	CONTRACTED	0.412914	-7.46819	TRUE
OG0000230	-21.6314	49.2629	-16.5077	45.0155	4.24741	TRUE	-5.41304	CONTRACTED	0.594895	-6.00793	TRUE
OG0000234	-24.5797	55.1594	-16.1869	44.3737	10.7857	TRUE	-6.86601	CONTRACTED	-0.452489	-6.41352	TRUE
OG0000236	-19.6683	45.3366	-14.8648	41.7295	3.60704	TRUE	-10.9623	CONTRACTED	-0.927661	-10.0346	TRUE
OG0000279	-26.7718	59.5436	-22.188	56.3759	3.16767	TRUE	-4.44624	CONTRACTED	3.85662	-8.30286	TRUE
OG0000283	-24.0526	54.1053	-17.549	47.0981	7.00719	TRUE	-1.24803	CONTRACTED	-0.619968	-0.628062	TRUE
OG0000285	-23.7126	53.4253	-18.3976	48.7953	4.63002	TRUE	-18.699	CONTRACTED	-4.77692	-13.9221	TRUE
OG0000297	-17.2189	40.4378	-11.1451	34.2902	6.14761	TRUE	-7.52732	CONTRACTED	0	-7.52732	TRUE
OG0000307	-20.5106	47.0213	-16.3783	44.7566	2.26469	TRUE	-14.9026	CONTRACTED	-1.50093	-13.4017	TRUE
OG0000337	-14.7563	35.5125	-10.3759	32.7518	2.76072	TRUE	-6.80612	CONTRACTED	0.0213286	-6.82745	TRUE
OG0000339	-26.7248	59.4496	-22.5467	57.0935	2.35617	TRUE	-5.11112	CONTRACTED	4.16921	-9.28033	TRUE
OG0000342	-30.9153	67.8305	-22.9125	57.8251	10.0054	TRUE	-7.60414	CONTRACTED	2.16613	-9.77027	TRUE
OG0000343	-19.2021	44.4041	-13.3632	38.7264	5.67768	TRUE	-4.09366	CONTRACTED	-2.21746	-1.8762	TRUE
OG0000346	-20.4188	46.8377	-15.6628	43.3256	3.51204	TRUE	-5.24535	CONTRACTED	-0.499971	-4.74538	TRUE
OG0000350	-29.8423	65.6846	-25.4	62.8001	2.88452	TRUE	-1.40525	CONTRACTED	10.7164	-12.1217	TRUE
OG0000361	-24.8152	55.6304	-18.2617	48.5234	7.10699	TRUE	-5.01882	CONTRACTED	-5.81163	0.79281	FALSE
OG0000386	-23.4894	52.9787	-17.8272	47.6543	5.32438	TRUE	-7.88717	CONTRACTED	-5.24774	-2.63943	TRUE
OG0000392	-27.8622	61.7244	-18.402	48.804	12.9204	TRUE	-11.5204	CONTRACTED	1.68888	-13.2093	TRUE
OG0000474	-22.4366	50.8732	-13.7987	39.5973	11.2759	TRUE	-6.66675	CONTRACTED	-1.08394	-5.58281	TRUE
OG0000475	-17.6761	41.3521	-13.6673	39.3346	2.01756	TRUE	-5.17661	CONTRACTED	13.2747	-18.4513	TRUE
OG0000493	-22.3965	50.793	-17.3673	46.7346	4.05839	TRUE	-0.73079	CONTRACTED	4.74946	-5.48025	TRUE
OG0000514	-24.7671	55.5343	-19.6365	51.273	4.26126	TRUE	-3.76362	CONTRACTED	0.516702	-4.28032	TRUE
OG0000537	-20.9257	47.8515	-16.2858	44.5715	3.27997	TRUE	-1.83522	CONTRACTED	-0.769792	-1.06543	TRUE
OG0000578	-18.2849	42.5699	-13.4753	38.9506	3.61931	TRUE	-61.6203	CONTRACTED	-26.5113	-35.109	TRUE
OG0000585	-19.9311	45.8623	-15.7974	43.5948	2.26745	TRUE	-2.82237	CONTRACTED	1.09757	-3.91994	TRUE
OG0000607	-32.7786	71.5571	-23.0025	58.0049	13.5522	TRUE	-4.54753	CONTRACTED	27.5264	-32.0739	TRUE
OG0000707	-22.8417	51.6834	-18.1201	48.2402	3.4432	TRUE	-519.712	CONTRACTED	-16.9777	-502.734	TRUE
OG0000708	-19.6231	45.2461	-15.5669	43.1339	2.11226	TRUE	-329.419	CONTRACTED	-39.2755	-290.143	TRUE
OG0000725	-23.0976	52.1952	-17.3788	46.7575	5.43768	TRUE	-13543.1	CONTRACTED	-28.6393	-13514.5	TRUE
OG0000736	-16.048	38.0961	-12.0392	36.0784	2.01771	TRUE	-14.9216	CONTRACTED	-1.37363	-13.548	TRUE
OG0000756	-19.5738	45.1476	-14.426	40.852	4.29563	TRUE	-13.7111	CONTRACTED	-1.68109	-12.03	TRUE
OG0000834	-20.8297	47.6593	-14.4738	40.9475	6.71181	TRUE	-19.19	CONTRACTED	-0.0395147	-19.1505	TRUE
OG0000849	-20.7018	47.4035	-16.6405	45.281	2.1225	TRUE	-2.38347	CONTRACTED	0.433641	-2.81711	TRUE
OG0000906	-19.6441	45.2882	-15.6419	43.2838	2.00444	TRUE	-29.8974	CONTRACTED	-0.181179	-29.7162	TRUE
OG0000945	-21.058	48.116	-14.2447	40.4894	7.62652	TRUE	-8.17771	CONTRACTED	-1.39315	-6.78456	TRUE
OG0000955	-19.8984	45.7967	-14.3329	40.6657	5.13101	TRUE	-5.39568	CONTRACTED	-0.646417	-4.74926	TRUE
OG0000965	-20.2708	46.5416	-14.7597	41.5194	5.0222	TRUE	-3.05143	CONTRACTED	-0.745663	-2.30577	TRUE
OG0000977	-20.6259	47.2518	-15.2373	42.4747	4.77712	TRUE	-10.4975	CONTRACTED	0.0939687	-10.5915	TRUE
OG0001015	-16.6625	39.325	-11.1133	34.2265	5.09851	TRUE	-27.582	CONTRACTED	-1.13455	-26.4474	TRUE
OG0001028	-22.3759	50.7518	-16.9631	45.9262	4.82565	TRUE	-670.107	CONTRACTED	-18.2963	-651.811	TRUE
OG0001088	-21.3287	48.6574	-16.7031	45.4061	3.25123	TRUE	-495.343	CONTRACTED	-39.3781	-455.965	TRUE
OG0001176	-16.8309	39.6619	-12.5517	37.1033	2.55853	TRUE	-1.4708	CONTRACTED	-0.813322	-0.657478	TRUE
OG0001205	-21.0241	48.0482	-15.3508	42.7016	5.3466	TRUE	-1525.28	CONTRACTED	-9.59146	-1515.69	TRUE
OG0001309	-17.8267	41.6534	-13.7952	39.5905	2.06291	TRUE	-4.65636	CONTRACTED	0.669532	-5.32589	TRUE
OG0001418	-21.5614	49.1228	-16.3098	44.6196	4.50324	TRUE	-7.42924	CONTRACTED	-0.957886	-6.47135	TRUE
OG0001435	-19.2117	44.4235	-14.7169	41.4338	2.98973	TRUE	-4.79441	CONTRACTED	-0.87337	-3.92104	TRUE
OG0001464	-18.3132	42.6264	-13.1422	38.2843	4.34204	TRUE	-17.7052	CONTRACTED	-0.953324	-16.7519	TRUE
OG0001487	-20.8391	47.6781	-15.5552	43.1105	4.56762	TRUE	-244.366	CONTRACTED	-123.101	-121.265	TRUE
OG0001502	-28.0965	62.1929	-18.7524	49.5048	12.6881	TRUE	-1.1e-06	CONTRACTED	-235.713	235.713	FALSE
OG0001508	-22.8739	51.7478	-16.6783	45.3566	6.39125	TRUE	-18.196	CONTRACTED	5.40543	-23.6014	TRUE
OG0001510	-16.7387	39.4774	-11.7777	35.5553	3.92207	TRUE	-9.6744	CONTRACTED	-0.727032	-8.94737	TRUE
OG0001533	-18.5182	43.0363	-12.8328	37.6657	5.37067	TRUE	-63.293	CONTRACTED	1.12569	-64.4187	TRUE
OG0001544	-16.7135	39.4271	-11.8311	35.6622	3.7649	TRUE	-2004.23	CONTRACTED	-22.9254	-1981.3	TRUE
OG0001568	-26.5514	59.1027	-16.1936	44.3872	14.7155	TRUE	-18.8624	CONTRACTED	0.918524	-19.7809	TRUE
OG0001617	-18.8809	43.7617	-13.7605	39.5209	4.2408	TRUE	-365.67	CONTRACTED	-3.22238	-362.448	TRUE
OG0001694	-12.3227	30.6455	-6.30328	24.6066	6.0389	TRUE	-0.477502	CONTRACTED	31.897	-32.3745	TRUE
OG0001856	-21.3868	48.7735	-16.5828	45.1655	3.60799	TRUE	-0.649266	CONTRACTED	29.7572	-30.4065	TRUE
OG0001861	-18.1164	42.2328	-13.0347	38.0694	4.16347	TRUE	-7.59589	CONTRACTED	-0.805927	-6.78996	TRUE
OG0001867	-13.4174	32.8348	-8.60932	29.2186	3.61613	TRUE	-7.24396	CONTRACTED	15.0326	-22.2766	TRUE
OG0001878	-14.2379	34.4758	-10.1305	32.261	2.21479	TRUE	-4.13907	CONTRACTED	-0.940586	-3.19848	TRUE
OG0001989	-17.1596	40.3192	-11.7697	35.5393	4.77986	TRUE	-6.81801	CONTRACTED	-0.935565	-5.88245	TRUE
OG0002021	-17.839	41.6781	-12.8564	37.7128	3.96529	TRUE	-13.0769	CONTRACTED	-0.688897	-12.388	TRUE
OG0002101	-16.0567	38.1134	-10.9183	33.8366	4.27682	TRUE	-5.96681	CONTRACTED	-0.704195	-5.26261	TRUE
OG0002239	-18.3602	42.7204	-13.0787	38.1575	4.56297	TRUE	-5.6748	CONTRACTED	5.74192	-11.4167	TRUE
OG0002347	-16.1228	38.2455	-11.9959	35.9919	2.25363	TRUE	-7.10001	CONTRACTED	0.020314	-7.12032	TRUE
OG0002427	-14.8068	35.6136	-9.63797	31.2759	4.33765	TRUE	-13.5801	CONTRACTED	-0.221884	-13.3582	TRUE
OG0002475	-21.8569	49.7138	-14.6485	41.297	8.41675	TRUE	-5.92035	CONTRACTED	0.740728	-6.66108	TRUE
OG0002608	-21.3615	48.723	-16.1504	44.3009	4.42217	TRUE	-16.1553	CONTRACTED	2.22619	-18.3815	TRUE
OG0002821	-17.5169	41.0338	-11.4595	34.919	6.11483	TRUE	-6532.03	CONTRACTED	-25.2822	-6506.75	TRUE
OG0002849	-15.9076	37.8152	-10.2639	32.5278	5.28743	TRUE	-27.0463	CONTRACTED	0.714684	-27.761	TRUE
OG0003031	-14.6608	35.3216	-10.1091	32.2182	3.1034	TRUE	-14.3697	CONTRACTED	-0.88459	-13.4851	TRUE
OG0003214	-13.2473	32.4947	-9.00086	30.0017	2.49295	TRUE	-3.1e-06	CONTRACTED	-0.45441	0.454407	FALSE
OG0003455	-12.8965	31.7929	-7.92784	27.8557	3.93727	TRUE	-0.852532	CONTRACTED	-0.510321	-0.342211	TRUE
OG0003458	-16.9109	39.8219	-12.6789	37.3577	2.46416	TRUE	-10.398	CONTRACTED	0.428463	-10.8265	TRUE
OG0003720	-13.0533	32.1065	-8.57426	29.1485	2.95801	TRUE	-5.95146	CONTRACTED	-0.939499	-5.01196	TRUE
OG0004224	-23.2215	52.4429	-15.9929	43.9858	8.45708	TRUE	-5908.42	CONTRACTED	-20.8763	-5887.54	TRUE
OG0004535	-21.1399	48.2798	-14.123	40.246	8.03388	TRUE	-4611.77	CONTRACTED	-46.1004	-4565.67	TRUE
OG0004918	-14.1093	34.2185	-9.32668	30.6534	3.56516	TRUE	-6.207	CONTRACTED	-0.853844	-5.35316	TRUE
OG0005089	-12.7845	31.569	-7.95867	27.9173	3.65162	TRUE	-16.4587	CONTRACTED	0.67217	-17.1309	TRUE
OG0006043	-14.9393	35.8787	-10.709	33.4181	2.46059	TRUE	-6.53139	CONTRACTED	4.91421	-11.4456	TRUE
OG0006122	-12.4069	30.8137	-7.54356	27.0871	3.72658	TRUE	-1.94381	CONTRACTED	-0.512148	-1.43166	TRUE
OG0006330	-24.5243	55.0486	-18.1941	48.3883	6.66029	TRUE	-9.39396	CONTRACTED	0.82822	-10.2222	TRUE
OG0006334	-12.05	30.0999	-6.52786	25.0557	5.04419	TRUE	-50.8931	CONTRACTED	-0.0728446	-50.8203	TRUE
OG0006380	-14.2541	34.5082	-9.12577	30.2515	4.2567	TRUE	-36.7461	CONTRACTED	-1.33929	-35.4068	TRUE
OG0006450	-10.2026	26.4052	-5.5281	23.0562	3.34905	TRUE	-6.50336	CONTRACTED	-0.933259	-5.5701	TRUE
OG0006580	-23.9503	53.9006	-15.464	42.928	10.9726	TRUE	-13.3594	CONTRACTED	3.68531	-17.0447	TRUE
OG0006587	-13.5331	33.0663	-7.26331	26.5266	6.53963	TRUE	-9.4039	CONTRACTED	-0.879738	-8.52416	TRUE
OG0006604	-8.65801	23.316	-3.93089	19.8618	3.45423	TRUE	-21.1968	CONTRACTED	-0.643748	-20.5531	TRUE
OG0006623	-10.3455	26.691	-4.95621	21.9124	4.77857	TRUE	-18.0342	CONTRACTED	-0.809571	-17.2246	TRUE
OG0006910	-13.1177	32.2354	-8.21051	28.421	3.81434	TRUE	-20.0461	CONTRACTED	11.1486	-31.1947	TRUE
OG0007164	-10.377	26.7541	-5.98773	23.9755	2.77863	TRUE	-9.3871	CONTRACTED	-0.579112	-8.80799	TRUE
OG0007264	-11.2174	28.4348	-6.41899	24.838	3.59684	TRUE	-4.87222	CONTRACTED	22.7904	-27.6626	TRUE
OG0007279	-8.97581	23.9516	-4.1163	20.2326	3.71902	TRUE	-14.1486	CONTRACTED	-0.894579	-13.254	TRUE
OG0007427	-15.9292	37.8585	-11.458	34.916	2.94251	TRUE	-556.572	CONTRACTED	-5.60685	-550.965	TRUE
OG0007507	-22.6016	51.2031	-18.0461	48.0923	3.11089	TRUE	-8.37504	CONTRACTED	2.98077	-11.3558	TRUE
OG0007511	-17.1482	40.2963	-12.0621	36.1242	4.17213	TRUE	-6.02675	CONTRACTED	-0.877213	-5.14954	TRUE
OG0007675	-15.9292	37.8585	-9.69308	31.3862	6.47231	TRUE	-24.3424	CONTRACTED	-0.296888	-24.0455	TRUE
OG0007678	-20.9448	47.8896	-15.2992	42.5983	5.29129	TRUE	-371.591	CONTRACTED	-27.7168	-343.874	TRUE
OG0007752	-22.8488	51.6976	-17.5106	47.0212	4.67638	TRUE	-14.7776	CONTRACTED	0.796447	-15.574	TRUE
OG0007782	-21.9526	49.9051	-16.8606	45.7212	4.18395	TRUE	-121.494	CONTRACTED	-3.36072	-118.133	TRUE
OG0007824	-8.97581	23.9516	-4.1163	20.2326	3.71902	TRUE	-14.1486	CONTRACTED	-0.894579	-13.254	TRUE
OG0007830	-18.3458	42.6916	-13.0748	38.1496	4.54193	TRUE	-11.9373	CONTRACTED	0.220908	-12.1582	TRUE
OG0007943	-14.3803	34.7607	-7.84211	27.6842	7.07649	TRUE	-276.404	CONTRACTED	1.15147	-277.555	TRUE
OG0008042	-9.81962	25.6392	-3.81913	19.6383	6.00098	TRUE	-60.6977	CONTRACTED	-0.614289	-60.0834	TRUE
OG0008415	-22.3863	50.7726	-15.3256	42.6513	8.12132	TRUE	-17.7328	CONTRACTED	12.895	-30.6278	TRUE
OG0008454	-19.995	45.99	-15.735	43.4699	2.52012	TRUE	-6.66055	CONTRACTED	15.2579	-21.9184	TRUE
OG0008501	-15.7501	37.5002	-9.77765	31.5553	5.94491	TRUE	-6.00886	CONTRACTED	1.21386	-7.22272	TRUE
OG0008507	-10.8589	27.7178	-5.57916	23.1583	4.55952	TRUE	-13.6509	CONTRACTED	-0.857071	-12.7938	TRUE
OG0008614	-20.5751	47.1502	-14.7815	41.563	5.58724	TRUE	-14.4068	CONTRACTED	1.35165	-15.7584	TRUE
OG0008753	-15.509	37.018	-10.4906	32.9811	4.03692	TRUE	-12.0245	CONTRACTED	-0.590987	-11.4335	TRUE
OG0008818	-17.8218	41.6436	-12.4683	36.9365	4.7071	TRUE	-12.6559	CONTRACTED	1.69765	-14.3536	TRUE
OG0009117	-15.1452	36.2903	-11.1446	34.2892	2.00112	TRUE	-11.8124	CONTRACTED	-0.181058	-11.6313	TRUE
OG0009466	-15.636	37.272	-10.4957	32.9915	4.28051	TRUE	-16.4297	CONTRACTED	4.61632	-21.046	TRUE
OG0009470	-14.6752	35.3504	-10.4757	32.9515	2.39898	TRUE	-20.1361	CONTRACTED	-2.31618	-17.8199	TRUE
OG0009510	-15.2051	36.4103	-9.89803	31.7961	4.61418	TRUE	-13.4746	CONTRACTED	0.947303	-14.4219	TRUE
OG0009601	-13.5303	33.0606	-8.06088	28.1218	4.93888	TRUE	-1.75642	CONTRACTED	1.65152	-3.40794	TRUE
OG0009686	-11.1414	28.2828	-6.70277	25.4055	2.87724	TRUE	-9.15267	CONTRACTED	-1.02395	-8.12872	TRUE
OG0009834	-18.0578	42.1157	-12.1723	36.3446	5.77105	TRUE	-126.37	CONTRACTED	1.81353	-128.184	TRUE
OG0009911	-11.3349	28.6697	-7.26244	26.5249	2.14485	TRUE	-11.7954	CONTRACTED	0.163417	-11.9588	TRUE
OG0010085	-13.333	32.666	-8.086	28.172	4.49395	TRUE	-14.2514	CONTRACTED	0.622233	-14.8736	TRUE
OG0010104	-13.5663	33.1325	-8.55978	29.1196	4.01299	TRUE	-13.9037	CONTRACTED	0.922809	-14.8265	TRUE
OG0010111	-12.9289	31.8577	-8.86536	29.7307	2.12702	TRUE	-11.0191	CONTRACTED	3.78553	-14.8046	TRUE
OG0010130	-15.7388	37.4777	-11.6298	35.2597	2.218	TRUE	-10.4694	CONTRACTED	3.30272	-13.7721	TRUE
OG0010164	-8.97581	23.9516	-4.1163	20.2326	3.71902	TRUE	-14.1486	CONTRACTED	-0.894579	-13.254	TRUE
OG0010311	-14.1234	34.2468	-9.8713	31.7426	2.50422	TRUE	-67.9466	CONTRACTED	-2.44226	-65.5043	TRUE
OG0010386	-15.7918	37.5837	-9.87714	31.7543	5.82942	TRUE	-13.4957	CONTRACTED	-0.548098	-12.9476	TRUE
OG0010401	-12.7037	31.4074	-8.09073	28.1815	3.22594	TRUE	-5.28925	CONTRACTED	-0.880163	-4.40909	TRUE
OG0010428	-13.2779	32.5559	-6.93705	25.8741	6.68177	TRUE	-20.0451	CONTRACTED	-0.354499	-19.6906	TRUE
OG0010523	-10.0774	26.1548	-5.31324	22.6265	3.52837	TRUE	-3.06932	CONTRACTED	-0.614434	-2.45489	TRUE
OG0010676	-14.2291	34.4582	-9.82524	31.6505	2.80775	TRUE	-2.75419	CONTRACTED	58.7009	-61.4551	TRUE
OG0010753	-14.3779	34.7557	-7.64178	27.2836	7.47218	TRUE	-18.3859	CONTRACTED	0.396615	-18.7825	TRUE
OG0010796	-14.0068	34.0136	-9.52395	31.0479	2.9657	TRUE	-27.6699	CONTRACTED	-0.857182	-26.8127	TRUE
OG0010816	-9.28705	24.5741	-4.65225	21.3045	3.2696	TRUE	-2451480	CONTRACTED	-871.873	-2450610	TRUE
OG0011073	-13.6651	33.3302	-9.6153	31.2306	2.09959	TRUE	-67347.1	CONTRACTED	-53.9662	-67293.1	TRUE
OG0011081	-13.0881	32.1763	-6.44187	24.8837	7.29255	TRUE	-1.76126	CONTRACTED	-0.251618	-1.50964	TRUE
OG0011175	-12.0652	30.1305	-5.8236	23.6472	6.48327	TRUE	-17.5326	CONTRACTED	-0.881701	-16.6509	TRUE
OG0011198	-14.4035	34.8071	-9.83009	31.6602	3.14687	TRUE	-3799.78	CONTRACTED	-109.608	-3690.17	TRUE
OG0011210	-11.6017	29.2035	-6.14889	24.2978	4.9057	TRUE	-13.6674	CONTRACTED	-0.956467	-12.7109	TRUE
OG0011220	-10.4341	26.8683	-4.60295	21.2059	5.66237	TRUE	-71.4226	CONTRACTED	-0.0278498	-71.3948	TRUE
OG0011240	-11.332	28.664	-7.27234	26.5447	2.11936	TRUE	-206.508	CONTRACTED	4.1445	-210.653	TRUE
OG0011590	-13.9598	33.9195	-8.50207	29.0041	4.9154	TRUE	-9.43025	CONTRACTED	42.0824	-51.5127	TRUE
OG0011742	-11.2511	28.5022	-5.58662	23.1732	5.32898	TRUE	-51.1853	CONTRACTED	1.51142	-52.6967	TRUE
OG0012268	-12.2383	30.4767	-6.20428	24.4086	6.06812	TRUE	-7.83419	CONTRACTED	-0.390651	-7.44354	TRUE
OG0012271	-12.8503	31.7005	-7.35886	26.7177	4.98279	TRUE	-100.478	CONTRACTED	5.0051	-105.483	TRUE
OG0012473	-10.4341	26.8683	-4.60295	21.2059	5.66237	TRUE	-71.4226	CONTRACTED	-0.0278498	-71.3948	TRUE
OG0012475	-10.1992	26.3984	-5.91723	23.8345	2.56398	TRUE	-12.8185	CONTRACTED	-0.955158	-11.8633	TRUE
OG0012486	-11.5692	29.1383	-7.04786	26.0957	3.04261	TRUE	-10.3767	CONTRACTED	-0.828972	-9.54773	TRUE
OG0012495	-11.596	29.1919	-7.16606	26.3321	2.85981	TRUE	-11.4339	CONTRACTED	1.09169	-12.5256	TRUE
OG0012510	-9.28705	24.5741	-4.65225	21.3045	3.2696	TRUE	-2451480	CONTRACTED	-871.873	-2450610	TRUE
OG0012625	-10.7244	27.4487	-6.02076	24.0415	3.40719	TRUE	-14.7804	CONTRACTED	-0.931971	-13.8484	TRUE
OG0013306	-10.0774	26.1548	-5.31324	22.6265	3.52837	TRUE	-3.06932	CONTRACTED	-0.614434	-2.45489	TRUE
OG0013502	-9.8642	25.7284	-5.36411	22.7282	3.00018	TRUE	-66.7678	CONTRACTED	0.941948	-67.7097	TRUE
OG0013552	-9.8642	25.7284	-5.36411	22.7282	3.00018	TRUE	-66.7678	CONTRACTED	0.941948	-67.7097	TRUE
OG0013566	-10.531	27.0619	-5.75533	23.5107	3.55127	TRUE	-5.35074	CONTRACTED	-0.853899	-4.49684	TRUE
OG0013660	-10.2026	26.4052	-5.64063	23.2813	3.12397	TRUE	-15.381	CONTRACTED	-0.952022	-14.429	TRUE
OG0013689	-9.8642	25.7284	-5.36411	22.7282	3.00018	TRUE	-66.7678	CONTRACTED	0.941948	-67.7097	TRUE
OG0014825	-10.3621	26.7243	-5.95468	23.9094	2.81493	TRUE	-6.76573	CONTRACTED	5.38726	-12.153	TRUE
OG0000000	-45.4403	96.8806	-42.7771	97.5542	-0.673531	FALSE
OG0000002	-39.7247	85.4495	-37.6983	87.3965	-1.94702	FALSE
OG0000004	-30.2301	66.4603	-27.7195	67.439	-0.978714	FALSE
OG0000005	-24.5251	55.0502	-29.1732	70.3465	-15.2962	FALSE
OG0000008	-39.3893	84.7786	-39.5731	91.1462	-6.36765	FALSE
OG0000011	-36.297	78.594	-34.7649	81.5298	-2.93581	FALSE
OG0000013	-31.8248	69.6495	-29.6432	71.2865	-1.63698	FALSE
OG0000016	-26.8067	59.6134	-27.5272	67.0544	-7.44098	FALSE
OG0000017	-27.2396	60.4792	-25.7674	63.5348	-3.05556	FALSE
OG0000019	-30.6066	67.2132	-26.6338	65.2677	1.94553	FALSE
OG0000021	-14.72	35.44	-14.6042	41.2085	-5.76852	FALSE
OG0000022	-25.4342	56.8684	-23.4492	58.8985	-2.03009	FALSE
OG0000023	-24.4689	54.9379	-22.1054	56.2108	-1.27295	FALSE
OG0000024	-25.0767	56.1535	-24.9601	61.9203	-5.76684	FALSE
OG0000026	-19.2868	44.5737	-19.1078	50.2156	-5.64192	FALSE
OG0000027	-31.658	69.3159	-29.4472	70.8943	-1.57844	FALSE
OG0000028	-32.7144	71.4288	-29.0381	70.0762	1.35254	FALSE
OG0000029	-19.9295	45.8589	-21.3662	54.7324	-8.87344	FALSE
OG0000030	-12.3044	30.6089	-10.4411	32.8822	-2.2733	FALSE
OG0000031	-21.3916	48.7833	-20.0218	52.0436	-3.26025	FALSE
OG0000032	-18.8458	43.6917	-17.385	46.77	-3.07828	FALSE
OG0000033	-10.4462	26.8924	-9.72427	31.4485	-4.55613	FALSE
OG0000034	-22.3032	50.6064	-22.6193	57.2385	-6.63209	FALSE
OG0000035	-20.5452	47.0905	-20.5633	53.1265	-6.03603	FALSE
OG0000036	-18.4474	42.8948	-17.5061	47.0123	-4.1175	FALSE
OG0000037	-31.3192	68.6383	-30.3312	72.6625	-4.02413	FALSE
OG0000039	-21.1695	48.339	-20.0381	52.0763	-3.73733	FALSE
OG0000040	-16.5389	39.0779	-15.7087	43.4174	-4.33952	FALSE
OG0000042	-31.767	69.5341	-27.8778	67.7557	1.77838	FALSE
OG0000043	-28.4105	62.821	-28.304	68.6081	-5.78705	FALSE
OG0000044	-17.2814	40.5628	-16.5633	45.1266	-4.56377	FALSE
OG0000045	-29.4742	64.9484	-28.4909	68.9819	-4.03347	FALSE
OG0000046	-17.5216	41.0432	-17.2674	46.5348	-5.49169	FALSE
OG0000047	-30.3775	66.755	-29.52	71.04	-4.28492	FALSE
OG0000048	-20.7433	47.4866	-17.4816	46.9632	0.523378	FALSE
OG0000050	-20.3584	46.7169	-21.8046	55.6092	-8.89235	FALSE
OG0000052	-14.1261	34.2522	-13.7364	39.4729	-5.22069	FALSE
OG0000053	-27.0005	60.001	-23.2016	58.4033	1.59775	FALSE
OG0000055	-19.4391	44.8782	-20.4697	52.9394	-8.06122	FALSE
OG0000056	-21.1004	48.2007	-19.5872	51.1744	-2.97365	FALSE
OG0000057	-11.7494	29.4987	-7.88373	27.7675	1.73126	FALSE
OG0000058	-17.4462	40.8925	-18.2069	48.4139	-7.52142	FALSE
OG0000060	-15.3584	36.7167	-14.3524	40.7048	-3.98804	FALSE
OG0000063	-25.7336	57.4671	-23.3554	58.7109	-1.24373	FALSE
OG0000064	-21.129	48.258	-21.4482	54.8965	-6.63847	FALSE
OG0000065	-24.1346	54.2693	-20.8706	53.7413	0.527996	FALSE
OG0000066	-21.193	48.386	-19.9679	51.9357	-3.54977	FALSE
OG0000068	-14.0859	34.1719	-14.6739	41.3477	-7.17584	FALSE
OG0000069	-31.3729	68.7457	-32.1127	76.2254	-7.47964	FALSE
OG0000070	-23.211	52.4221	-30.3035	72.6071	-20.185	FALSE
OG0000071	-23.9904	53.9808	-24.0136	60.0272	-6.04634	FALSE
OG0000073	-22.6308	51.2616	-25.9706	63.9413	-12.6797	FALSE
OG0000074	-30.5521	67.1042	-28.1475	68.295	-1.19081	FALSE
OG0000075	-18.9525	43.905	-17.026	46.0521	-2.1471	FALSE
OG0000076	-13.542	33.084	-13.4976	38.9952	-5.91123	FALSE
OG0000078	-32.8581	71.7163	-31.4107	74.8215	-3.10518	FALSE
OG0000079	-13.726	33.4519	-13.4516	38.9032	-5.45132	FALSE
OG0000080	-15.7266	37.4533	-14.5212	41.0424	-3.58914	FALSE
OG0000081	-25.6394	57.2787	-23.1138	58.2277	-0.948979	FALSE
OG0000082	-18.2809	42.5618	-20.2075	52.4149	-9.85314	FALSE
OG0000083	-26.1115	58.2231	-24.5643	61.1286	-2.90552	FALSE
OG0000084	-27.1095	60.219	-25.5656	63.1312	-2.91221	FALSE
OG0000085	-17.6706	41.3412	-17.6386	47.2772	-5.93597	FALSE
OG0000086	-28.3397	62.6795	-25.4864	62.9727	-0.293246	FALSE
OG0000087	-19.2121	44.4242	-23.9405	59.8811	-15.4568	FALSE
OG0000089	-16.2674	38.5349	-16.1406	44.2813	-5.74645	FALSE
OG0000091	-19.0037	44.0074	-16.1083	44.2166	-0.209192	FALSE
OG0000092	-20.8205	47.641	-22.3468	56.6937	-9.05269	FALSE
OG0000094	-13.2111	32.4221	-9.29045	30.5809	1.84125	FALSE
OG0000095	-20.2994	46.5988	-25.312	62.6241	-16.0252	FALSE
OG0000097	-18.3207	42.6415	-15.3743	42.7485	-0.107045	FALSE
OG0000098	-13.5691	33.1383	-13.5858	39.1716	-6.03328	FALSE
OG0000101	-18.2671	42.5342	-20.4345	52.8689	-10.3348	FALSE
OG0000103	-22.7144	51.4288	-22.6405	57.281	-5.8522	FALSE
OG0000104	-20.1215	46.2429	-20.4631	52.9262	-6.68331	FALSE
OG0000105	-25.4488	56.8976	-25.6726	63.3452	-6.4476	FALSE
OG0000106	-15.3656	36.7312	-15.1334	42.2668	-5.53567	FALSE
OG0000107	-18.9995	43.999	-18.9223	49.8445	-5.84555	FALSE
OG0000108	-23.6056	53.2111	-21.0211	54.0421	-0.831016	FALSE
OG0000109	-19.0487	44.0974	-21.3122	54.6244	-10.527	FALSE
OG0000110	-19.5	45	-17.9022	47.8044	-2.80439	FALSE
OG0000111	-20.7978	47.5957	-22.5411	57.0822	-9.48653	FALSE
OG0000112	-25.1588	56.3177	-24.7458	61.4916	-5.17391	FALSE
OG0000113	-16.2282	38.4565	-12.6498	37.2996	1.15687	FALSE
OG0000114	-19.6302	45.2604	-16.6098	45.2197	0.0407417	FALSE
OG0000115	-9.00964	24.0193	-9.09004	30.1801	-6.1608	FALSE
OG0000117	-20.0825	46.165	-19.2103	50.4205	-4.2555	FALSE
OG0000118	-41.8678	89.7357	-38.6367	89.2734	0.462244	FALSE
OG0000119	-23.4349	52.8698	-22.9625	57.9251	-5.0553	FALSE
OG0000120	-23.5353	53.0706	-23.3215	58.643	-5.57239	FALSE
OG0000121	-19.7656	45.5311	-23.3098	58.6196	-13.0885	FALSE
OG0000122	-18.909	43.818	-16.0102	44.0204	-0.202339	FALSE
OG0000123	-17.4447	40.8895	-17.5454	47.0907	-6.20122	FALSE
OG0000124	-15.5047	37.0094	-15.2354	42.4707	-5.46131	FALSE
OG0000125	-17.6023	41.2046	-17.9122	47.8245	-6.61982	FALSE
OG0000126	-16.3732	38.7463	-15.9743	43.9486	-5.20229	FALSE
OG0000128	-17.9949	41.9898	-18.1763	48.3526	-6.36279	FALSE
OG0000130	-11.3055	28.6109	-11.6818	35.3637	-6.75278	FALSE
OG0000131	-16.0753	38.1506	-15.4689	42.9379	-4.78724	FALSE
OG0000132	-33.8059	73.6117	-31.3251	74.6503	-1.03856	FALSE
OG0000133	-18.9122	43.8245	-17.0311	46.0622	-2.23775	FALSE
OG0000134	-10.2514	26.5029	-9.76213	31.5243	-5.02141	FALSE
OG0000135	-13.9832	33.9664	-14.1062	40.2124	-6.24598	FALSE
OG0000136	-14.7221	35.4441	-14.4704	40.9407	-5.49656	FALSE
OG0000137	-24.0686	54.1371	-20.32	52.6399	1.49722	FALSE
OG0000138	-11.2787	28.5574	-11.0123	34.0245	-5.4671	FALSE
OG0000139	-15.8534	37.7068	-15.5664	43.1328	-5.42598	FALSE
OG0000140	-14.9143	35.8285	-15.475	42.95	-7.12144	FALSE
OG0000141	-19.762	45.524	-16.9599	45.9198	-0.395756	FALSE
OG0000142	-33.2441	72.4882	-30.8357	73.6714	-1.18323	FALSE
OG0000143	-14.249	34.4981	-14.1484	40.2969	-5.7988	FALSE
OG0000144	-18.4062	42.8123	-19.0409	50.0819	-7.26954	FALSE
OG0000145	-31.0717	68.1435	-29.7066	71.4133	-3.2698	FALSE
OG0000146	-22.5973	51.1945	-19.3027	50.6054	0.589078	FALSE
OG0000147	-24.5889	55.1777	-22.5791	57.1582	-1.98043	FALSE
OG0000148	-16.3253	38.6506	-17.1431	46.2862	-7.63556	FALSE
OG0000149	-13.7001	33.4003	-12.2063	36.4126	-3.01231	FALSE
OG0000150	-33.3259	72.6519	-30.1832	72.3664	0.285484	FALSE
OG0000151	-13.0366	32.0732	-11.7605	35.5211	-3.4479	FALSE
OG0000152	-19.686	45.372	-18.6234	49.2469	-3.87491	FALSE
OG0000153	-17.6402	41.2805	-18.3117	48.6234	-7.34293	FALSE
OG0000154	-23.4399	52.8797	-21.2551	54.5102	-1.63041	FALSE
OG0000155	-17.3849	40.7698	-17.2991	46.5982	-5.82841	FALSE
OG0000157	-30.3111	66.6223	-27.1641	66.3282	0.294108	FALSE
OG0000158	-19.0649	44.1298	-17.7067	47.4135	-3.2837	FALSE
OG0000159	-22.7444	51.4888	-20.7953	53.5906	-2.10177	FALSE
OG0000160	-22.4605	50.921	-22.0645	56.1289	-5.20795	FALSE
OG0000162	-14.0484	34.0969	-13.3789	38.7578	-4.66097	FALSE
OG0000163	-25.0996	56.1993	-21.4507	54.9014	1.29789	FALSE
OG0000164	-10.2555	26.511	-11.3885	34.777	-8.26592	FALSE
OG0000166	-18.4381	42.8762	-17.88	47.7599	-4.88372	FALSE
OG0000167	-16.4891	38.9781	-16.2175	44.435	-5.45689	FALSE
OG0000168	-17.1201	40.2401	-15.0791	42.1583	-1.91815	FALSE
OG0000169	-15.1394	36.2788	-17.0811	46.1622	-9.88339	FALSE
OG0000170	-17.9373	41.8747	-16.2247	44.4493	-2.57464	FALSE
OG0000171	-19.7892	45.5784	-18.675	49.35	-3.77155	FALSE
OG0000173	-16.9899	39.9798	-16.802	45.6039	-5.62417	FALSE
OG0000174	-15.0463	36.0926	-13.7176	39.4353	-3.34269	FALSE
OG0000175	-15.9137	37.8275	-15.6232	43.2463	-5.41887	FALSE
OG0000176	-14.9563	35.9126	-15.4628	42.9255	-7.01286	FALSE
OG0000177	-22.17	50.34	-21.5009	55.0017	-4.66169	FALSE
OG0000179	-16.7702	39.5404	-16.0975	44.195	-4.65454	FALSE
OG0000180	-16.171	38.342	-16.8929	45.7859	-7.44385	FALSE
OG0000181	-14.243	34.4859	-13.1361	38.2721	-3.78621	FALSE
OG0000182	-30.5309	67.0618	-32.157	76.3141	-9.25227	FALSE
OG0000184	-16.4657	38.9313	-13.9412	39.8825	-0.951178	FALSE
OG0000185	-25.3493	56.6986	-24.397	60.794	-4.09534	FALSE
OG0000186	-14.3979	34.7958	-12.2459	36.4918	-1.69602	FALSE
OG0000187	-20.7252	47.4505	-19.6432	51.2864	-3.83594	FALSE
OG0000188	-19.4638	44.9276	-19.4026	50.8051	-5.87749	FALSE
OG0000189	-15.53	37.0601	-15.2056	42.4111	-5.35105	FALSE
OG0000191	-28.6858	63.3715	-28.306	68.6119	-5.24043	FALSE
OG0000192	-13.7613	33.5226	-12.4026	36.8052	-3.28254	FALSE
OG0000193	-17.8797	41.7594	-21.1625	54.3251	-12.5657	FALSE
OG0000194	-15.6045	37.209	-13.8893	39.7786	-2.56965	FALSE
OG0000195	-14.8114	35.6229	-16.5288	45.0576	-9.43477	FALSE
OG0000196	-15.2036	36.4072	-13.5333	39.0665	-2.6593	FALSE
OG0000197	-24.5866	55.1732	-23.3131	58.6262	-3.45306	FALSE
OG0000199	-26.6127	59.2255	-25.3657	62.7313	-3.50582	FALSE
OG0000200	-24.6861	55.3722	-24.3197	60.6395	-5.26727	FALSE
OG0000201	-25.0459	56.0919	-23.257	58.5139	-2.42206	FALSE
OG0000202	-16.1082	38.2164	-16.1555	44.311	-6.09458	FALSE
OG0000203	-14.5008	35.0015	-12.5747	37.1495	-2.14794	FALSE
OG0000204	-22.3523	50.7046	-29.523	71.046	-20.3413	FALSE
OG0000205	-12.415	30.8301	-11.9343	35.8685	-5.03845	FALSE
OG0000209	-17.6931	41.3862	-15.4574	42.9148	-1.52867	FALSE
OG0000210	-15.2729	36.5459	-15.8427	43.6854	-7.13947	FALSE
OG0000211	-18.4532	42.9063	-17.88	47.76	-4.85368	FALSE
OG0000212	-17.0762	40.1524	-20.0596	52.1192	-11.9668	FALSE
OG0000213	-15.6131	37.2262	-15.3806	42.7612	-5.53505	FALSE
OG0000215	-16.8065	39.613	-16.7081	45.4161	-5.80309	FALSE
OG0000216	-13.0364	32.0728	-12.7921	37.5841	-5.51128	FALSE
OG0000218	-19.9013	45.8026	-17.3956	46.7912	-0.988537	FALSE
OG0000219	-18.8085	43.6171	-18.8579	49.7158	-6.09876	FALSE
OG0000220	-10.1045	26.209	-10.1814	32.3629	-6.15391	FALSE
OG0000221	-16.8776	39.7552	-15.2742	42.5484	-2.7932	FALSE
OG0000223	-19.7667	45.5335	-18.904	49.8081	-4.27459	FALSE
OG0000225	-19.9056	45.8112	-16.4509	44.9017	0.909508	FALSE
OG0000226	-12.7088	31.4177	-12.1779	36.3559	-4.9382	FALSE
OG0000227	-23.9834	53.9667	-23.3628	58.7256	-4.75885	FALSE
OG0000228	-28.1887	62.3774	-28.609	69.218	-6.84058	FALSE
OG0000229	-11.6339	29.2677	-8.54289	29.0858	0.181929	FALSE
OG0000231	-19.5622	45.1244	-18.1833	48.3665	-3.2421	FALSE
OG0000232	-3.02751	12.055	-2.83432	17.6686	-5.61363	FALSE
OG0000233	-20.0039	46.0078	-18.0506	48.1012	-2.09337	FALSE
OG0000235	-16.739	39.478	-21.2999	54.5998	-15.1219	FALSE
OG0000238	-12.4645	30.9291	-12.9041	37.8083	-6.87922	FALSE
OG0000239	-36.5246	79.0492	-37.041	86.0819	-7.03272	FALSE
OG0000240	-36.669	79.338	-37.0269	86.0539	-6.71589	FALSE
OG0000241	-17.4046	40.8092	-15.668	43.336	-2.52676	FALSE
OG0000243	-16.4687	38.9374	-16.461	44.922	-5.98457	FALSE
OG0000244	-18.6913	43.3827	-16.8614	45.7227	-2.34003	FALSE
OG0000245	-25.5228	57.0457	-24.3921	60.7843	-3.7386	FALSE
OG0000247	-22.3228	50.6457	-22.5042	57.0084	-6.36269	FALSE
OG0000249	-22.6114	51.2227	-22.8104	57.6209	-6.39812	FALSE
OG0000250	-15.1705	36.341	-18.2592	48.5184	-12.1774	FALSE
OG0000251	-8.68991	23.3798	-7.21865	26.4373	-3.0575	FALSE
OG0000252	-18.5783	43.1565	-17.0091	46.0182	-2.86164	FALSE
OG0000253	-9.32101	24.642	-8.05808	28.1162	-3.47414	FALSE
OG0000254	-12.3298	30.6596	-11.26	34.5199	-3.86029	FALSE
OG0000255	-24.5995	55.199	-24.1637	60.3273	-5.12835	FALSE
OG0000256	-12.0563	30.1127	-11.366	34.732	-4.61927	FALSE
OG0000257	-15.1324	36.2647	-13.9299	39.8598	-3.59508	FALSE
OG0000258	-21.2989	48.5979	-19.0738	50.1476	-1.54974	FALSE
OG0000259	-24.322	54.644	-22.4383	56.8765	-2.23253	FALSE
OG0000260	-19.9323	45.8646	-20.3763	52.7526	-6.88796	FALSE
OG0000262	-26.8552	59.7105	-25.3565	62.7129	-3.00243	FALSE
OG0000263	-22.4804	50.9608	-21.2709	54.5419	-3.58109	FALSE
OG0000264	-13.8638	33.7275	-13.6211	39.2421	-5.51457	FALSE
OG0000265	-23.4076	52.8151	-20.4116	52.8233	-0.0081506	FALSE
OG0000266	-15.3491	36.6983	-16.1453	44.2906	-7.59226	FALSE
OG0000267	-14.902	35.8041	-15.8447	43.6894	-7.88532	FALSE
OG0000268	-24.3392	54.6783	-21.7615	55.523	-0.84467	FALSE
OG0000269	-14.2967	34.5933	-18.5612	49.1224	-14.5291	FALSE
OG0000270	-13.0477	32.0954	-11.5498	35.0995	-3.00416	FALSE
OG0000271	-19.0641	44.1281	-17.3433	46.6866	-2.5585	FALSE
OG0000272	-14.1851	34.3701	-14.0423	40.0845	-5.71441	FALSE
OG0000273	-18.8429	43.6858	-19.0492	50.0985	-6.41268	FALSE
OG0000275	-11.8318	29.6635	-12.4879	36.9758	-7.31225	FALSE
OG0000276	-11.7935	29.587	-11.0772	34.1545	-4.56751	FALSE
OG0000277	-16.9226	39.8453	-16.7549	45.5098	-5.66453	FALSE
OG0000278	-14.5643	35.1286	-14.5592	41.1184	-5.98988	FALSE
OG0000280	-23.3188	52.6376	-23.4853	58.9706	-6.33296	FALSE
OG0000281	-9.13736	24.2747	-8.86441	29.7288	-5.4541	FALSE
OG0000282	-10.4034	26.8067	-10.9079	33.8158	-7.00904	FALSE
OG0000284	-22.8974	51.7948	-21.4037	54.8074	-3.01255	FALSE
OG0000286	-19.5353	45.0706	-17.0492	46.0984	-1.02779	FALSE
OG0000287	-13.8934	33.7869	-13.345	38.69	-4.90313	FALSE
OG0000288	-15.2649	36.5297	-14.9713	41.9425	-5.41282	FALSE
OG0000289	-10.7825	27.565	-10.383	32.766	-5.20098	FALSE
OG0000290	-13.86	33.72	-14.3415	40.6831	-6.96309	FALSE
OG0000291	-17.5315	41.063	-15.6536	43.3071	-2.24414	FALSE
OG0000292	-18.8123	43.6247	-19.2287	50.4574	-6.83273	FALSE
OG0000293	-16.8555	39.7109	-14.5035	41.0071	-1.29615	FALSE
OG0000294	-12.844	31.6879	-11.8576	35.7152	-4.02728	FALSE
OG0000295	-21.3023	48.6045	-21.4641	54.9283	-6.32372	FALSE
OG0000296	-17.5352	41.0705	-16.6011	45.2021	-4.13161	FALSE
OG0000298	-16.9469	39.8937	-17.0403	46.0806	-6.18685	FALSE
OG0000299	-9.89835	25.7967	-9.78404	31.5681	-5.77138	FALSE
OG0000300	-22.6156	51.2311	-20.2226	52.4452	-1.21404	FALSE
OG0000301	-10.9625	27.9251	-9.26017	30.5203	-2.59525	FALSE
OG0000302	-23.095	52.19	-21.9186	55.8372	-3.64716	FALSE
OG0000303	-23.7088	53.4177	-20.5261	53.0522	0.365454	FALSE
OG0000304	-7.46165	20.9233	-7.78647	27.5729	-6.64962	FALSE
OG0000305	-10.8289	27.6577	-10.4632	32.9264	-5.26866	FALSE
OG0000306	-18.8643	43.7287	-16.6189	45.2379	-1.50919	FALSE
OG0000308	-10.5975	27.1949	-9.0742	30.1484	-2.95346	FALSE
OG0000309	-13.2842	32.5685	-13.4626	38.9253	-6.35678	FALSE
OG0000310	-17.4229	40.8457	-18.7865	49.5731	-8.72732	FALSE
OG0000311	-27.1719	60.3437	-25.1097	62.2195	-1.87577	FALSE
OG0000312	-13.8675	33.735	-16.5225	45.045	-11.31	FALSE
OG0000313	-14.7698	35.5395	-14.8295	41.659	-6.11943	FALSE
OG0000314	-11.3932	28.7864	-11.779	35.5579	-6.77154	FALSE
OG0000315	-19.5783	45.1566	-19.8152	51.6304	-6.47371	FALSE
OG0000316	-8.24546	22.4909	-9.48794	30.9759	-8.48495	FALSE
OG0000317	-15.0839	36.1678	-13.6343	39.2687	-3.10089	FALSE
OG0000319	-9.3597	24.7194	-8.95242	29.9048	-5.18545	FALSE
OG0000320	-7.02533	20.0507	-7.99826	27.9965	-7.94587	FALSE
OG0000321	-10.8928	27.7856	-9.55569	31.1114	-3.32576	FALSE
OG0000322	-14.0819	34.1638	-14.6793	41.3585	-7.19475	FALSE
OG0000323	-25.2896	56.5792	-23.8965	59.7929	-3.21368	FALSE
OG0000324	-21.8754	49.7507	-19.0252	50.0504	-0.299698	FALSE
OG0000325	-14.082	34.164	-15.5418	43.0836	-8.91961	FALSE
OG0000326	-26.2576	58.5151	-25.7122	63.4244	-4.90928	FALSE
OG0000327	-22.1734	50.3467	-22.3754	56.7508	-6.40412	FALSE
OG0000328	-11.521	29.0421	-11.3956	34.7911	-5.74905	FALSE
OG0000329	-15.5844	37.1689	-15.7867	43.5734	-6.40459	FALSE
OG0000330	-14.4787	34.9575	-13.3197	38.6394	-3.68193	FALSE
OG0000332	-21.2864	48.5727	-21.1786	54.3571	-5.78441	FALSE
OG0000333	-14.877	35.754	-15.2522	42.5044	-6.75045	FALSE
OG0000334	-13.6798	33.3597	-13.8444	39.6889	-6.32922	FALSE
OG0000335	-13.3501	32.7003	-13.6714	39.3429	-6.64261	FALSE
OG0000336	-10.2917	26.5835	-9.86661	31.7332	-5.14977	FALSE
OG0000338	-13.8856	33.7712	-12.016	36.0319	-2.26068	FALSE
OG0000340	-23.3152	52.6305	-22.0126	56.0253	-3.39484	FALSE
OG0000341	-5.16345	16.3269	-4.60593	21.2119	-4.88495	FALSE
OG0000344	-18.9331	43.8662	-18.0295	48.0591	-4.19286	FALSE
OG0000345	-8.91595	23.8319	-8.94198	29.884	-6.05206	FALSE
OG0000347	-17.1944	40.3888	-16.7537	45.5073	-5.11853	FALSE
OG0000348	-16.6487	39.2974	-20.2458	52.4917	-13.1943	FALSE
OG0000349	-13.7932	33.5863	-13.2651	38.5302	-4.94394	FALSE
OG0000351	-16.2493	38.4987	-16.3075	44.6149	-6.11626	FALSE
OG0000352	-20.357	46.7139	-19.7802	51.5604	-4.84648	FALSE
OG0000353	-16.2037	38.4073	-15.2048	42.4097	-4.00234	FALSE
OG0000354	-15.5915	37.183	-16.8729	45.7458	-8.56288	FALSE
OG0000355	-14.7317	35.4634	-13.6527	39.3055	-3.84203	FALSE
OG0000356	-14.6635	35.3269	-13.5566	39.1133	-3.78633	FALSE
OG0000357	-21.6716	49.3432	-18.5798	49.1596	0.183652	FALSE
OG0000358	-21.3829	48.7658	-19.2219	50.4438	-1.67806	FALSE
OG0000360	-12.9977	31.9954	-13.0542	38.1085	-6.11304	FALSE
OG0000362	-13.2432	32.4865	-12.5864	37.1728	-4.68634	FALSE
OG0000364	-15.5274	37.0548	-15.9035	43.8071	-6.7523	FALSE
OG0000365	-22.3456	50.6911	-22.2443	56.4886	-5.79747	FALSE
OG0000366	-9.90036	25.8007	-8.99854	29.9971	-4.19636	FALSE
OG0000367	-14.6419	35.2838	-17.3163	46.6325	-11.3488	FALSE
OG0000368	-15.1727	36.3454	-14.4136	40.8273	-4.48184	FALSE
OG0000369	-23.2855	52.5711	-19.8012	51.6024	0.968631	FALSE
OG0000370	-25.4461	56.8922	-22.5612	57.1223	-0.230146	FALSE
OG0000371	-17.7201	41.4403	-16.3684	44.7368	-3.29654	FALSE
OG0000372	-8.72027	23.4405	-8.33008	28.6602	-5.21961	FALSE
OG0000373	-10.4851	26.9701	-9.13881	30.2776	-3.30748	FALSE
OG0000374	-12.3633	30.7267	-10.4295	32.8589	-2.13226	FALSE
OG0000375	-17.49	40.98	-17.7329	47.4659	-6.48588	FALSE
OG0000376	-18.0929	42.1859	-17.6095	47.2191	-5.03318	FALSE
OG0000377	-19.4924	44.9848	-23.8534	59.7069	-14.722	FALSE
OG0000378	-10.7582	27.5164	-10.3024	32.6048	-5.08844	FALSE
OG0000379	-8.69351	23.387	-8.46202	28.924	-5.53702	FALSE
OG0000380	-13.9436	33.8873	-14.7168	41.4335	-7.54624	FALSE
OG0000381	-9.50389	25.0078	-7.25119	26.5024	-1.4946	FALSE
OG0000382	-16.2562	38.5124	-17.4208	46.8415	-8.32911	FALSE
OG0000383	-15.7695	37.5389	-18.3832	48.7665	-11.2276	FALSE
OG0000384	-23.6016	53.2032	-21.8662	55.7323	-2.52912	FALSE
OG0000385	-13.9269	33.8539	-14.4401	40.8802	-7.02632	FALSE
OG0000387	-14.1339	34.2678	-14.2143	40.4286	-6.16081	FALSE
OG0000388	-13.9523	33.9046	-14.1424	40.2848	-6.38018	FALSE
OG0000389	-12.9328	31.8656	-12.8289	37.6578	-5.79223	FALSE
OG0000390	-6.53159	19.0632	-7.69853	27.3971	-8.33387	FALSE
OG0000391	-16.2126	38.4252	-13.9611	39.9223	-1.49704	FALSE
OG0000393	-17.7301	41.4603	-19.4583	50.9165	-9.45626	FALSE
OG0000394	-19.6342	45.2684	-17.5468	47.0936	-1.82518	FALSE
OG0000396	-16.2984	38.5968	-17.4224	46.8448	-8.24795	FALSE
OG0000397	-9.20973	24.4195	-9.29166	30.5833	-6.16385	FALSE
OG0000398	-25.3639	56.7278	-26.0872	64.1744	-7.44661	FALSE
OG0000399	-22.8455	51.6911	-22.0374	56.0747	-4.38367	FALSE
OG0000400	-8.20842	22.4168	-6.82702	25.654	-3.2372	FALSE
OG0000401	-20.7524	47.5048	-19.4605	50.9211	-3.41632	FALSE
OG0000402	-12.6647	31.3293	-13.2587	38.5175	-7.18817	FALSE
OG0000403	-14.3343	34.6685	-14.9704	41.9408	-7.27225	FALSE
OG0000404	-29.4544	64.9088	-29.7457	71.4914	-6.58268	FALSE
OG0000405	-13.7567	33.5134	-13.8601	39.7203	-6.20691	FALSE
OG0000406	-17.9486	41.8972	-17.6023	47.2046	-5.30744	FALSE
OG0000407	-18.7365	43.4729	-17.2775	46.555	-3.08209	FALSE
OG0000408	-15.7405	37.481	-21.3457	54.6913	-17.2104	FALSE
OG0000409	-24.1629	54.3257	-23.5692	59.1384	-4.81268	FALSE
OG0000410	-26.5566	59.1132	-28.0492	68.0983	-8.98511	FALSE
OG0000411	-15.6776	37.3551	-11.921	35.842	1.51316	FALSE
OG0000412	-12.5004	31.0008	-12.4596	36.9191	-5.91829	FALSE
OG0000413	-10.9027	27.8055	-8.13545	28.2709	-0.465411	FALSE
OG0000414	-21.4867	48.9734	-18.1103	48.2206	0.752777	FALSE
OG0000415	-16.469	38.9381	-15.7883	43.5766	-4.63847	FALSE
OG0000416	-14.3083	34.6165	-14.2773	40.5547	-5.93815	FALSE
OG0000417	-12.3019	30.6037	-10.9135	33.827	-3.22332	FALSE
OG0000418	-7.51496	21.0299	-6.73506	25.4701	-4.4402	FALSE
OG0000419	-16.7563	39.5126	-16.1472	44.2943	-4.78174	FALSE
OG0000420	-14.1414	34.2828	-14.5558	41.1117	-6.82888	FALSE
OG0000421	-19.1174	44.2348	-18.5737	49.1475	-4.91271	FALSE
OG0000422	-17.6229	41.2459	-16.4258	44.8515	-3.60566	FALSE
OG0000423	-9.35351	24.707	-9.03818	30.0764	-5.36935	FALSE
OG0000424	-17.8946	41.7892	-16.544	45.088	-3.29873	FALSE
OG0000425	-15.2348	36.4696	-12.5301	37.0602	-0.590638	FALSE
OG0000426	-16.5388	39.0776	-16.6728	45.3456	-6.26801	FALSE
OG0000428	-13.0457	32.0914	-12.4792	36.9583	-4.86691	FALSE
OG0000429	-20.9887	47.9775	-20.614	53.2279	-5.25048	FALSE
OG0000430	-14.5951	35.1902	-14.4756	40.9512	-5.76102	FALSE
OG0000431	-3.02751	12.055	-2.83432	17.6686	-5.61363	FALSE
OG0000432	-21.1239	48.2479	-20.3338	52.6676	-4.41974	FALSE
OG0000433	-14.2455	34.4909	-13.8917	39.7835	-5.29257	FALSE
OG0000434	-13.727	33.454	-13.6984	39.3969	-5.94291	FALSE
OG0000435	-22.0352	50.0704	-20.8355	53.671	-3.6006	FALSE
OG0000436	-11.7322	29.4644	-11.1805	34.361	-4.89659	FALSE
OG0000437	-12.7035	31.4071	-12.6891	37.3781	-5.97104	FALSE
OG0000438	-9.5105	25.021	-9.50582	31.0116	-5.99065	FALSE
OG0000439	-13.8932	33.7864	-13.0318	38.0635	-4.27717	FALSE
OG0000440	-24.8309	55.6617	-22.5129	57.0257	-1.36398	FALSE
OG0000441	-15.5382	37.0763	-12.7386	37.4773	-0.400947	FALSE
OG0000442	-16.8736	39.7471	-17.5057	47.0114	-7.2643	FALSE
OG0000443	-14.0975	34.1951	-13.6432	39.2864	-5.09135	FALSE
OG0000444	-17.054	40.108	-16.0232	44.0465	-3.93847	FALSE
OG0000445	-14.6919	35.3837	-15.1174	42.2349	-6.85114	FALSE
OG0000446	-15.649	37.298	-13.3425	38.685	-1.38701	FALSE
OG0000447	-16.6157	39.2314	-15.4537	42.9074	-3.67603	FALSE
OG0000448	-7.75178	21.5036	-9.21251	30.425	-8.92146	FALSE
OG0000449	-14.8914	35.7829	-14.3258	40.6517	-4.86876	FALSE
OG0000450	-18.1595	42.3191	-20.2646	52.5292	-10.2101	FALSE
OG0000451	-3.02751	12.055	-2.83432	17.6686	-5.61363	FALSE
OG0000452	-10.7017	27.4035	-10.5247	33.0494	-5.64596	FALSE
OG0000453	-17.3021	40.6043	-16.4938	44.9877	-4.38341	FALSE
OG0000454	-19.0055	44.0109	-17.4426	46.8853	-2.87435	FALSE
OG0000455	-12.0941	30.1882	-12.0895	36.1789	-5.99066	FALSE
OG0000456	-22.7927	51.5854	-19.5828	51.1655	0.4199	FALSE
OG0000457	-13.0486	32.0973	-10.5407	33.0814	-0.984086	FALSE
OG0000458	-18.6736	43.3472	-18.9744	49.9488	-6.60158	FALSE
OG0000459	-8.54807	23.0961	-7.21829	26.4366	-3.34043	FALSE
OG0000460	-11.1292	28.2584	-10.7858	33.5716	-5.31327	FALSE
OG0000461	-20.6013	47.2025	-19.8535	51.7071	-4.50455	FALSE
OG0000462	-15.5493	37.0987	-15.5499	43.0998	-6.00112	FALSE
OG0000463	-18.2678	42.5356	-16.7946	45.5892	-3.05357	FALSE
OG0000464	-27.0967	60.1934	-27.3329	66.6658	-6.47244	FALSE
OG0000465	-20.5056	47.0111	-18.8639	49.7278	-2.71664	FALSE
OG0000466	-18.4208	42.8415	-15.92	43.84	-0.998466	FALSE
OG0000467	-12.6328	31.2655	-13.9016	39.8032	-8.53766	FALSE
OG0000468	-13.4677	32.9355	-13.3117	38.6235	-5.688	FALSE
OG0000470	-3.02751	12.055	-2.83432	17.6686	-5.61363	FALSE
OG0000471	-14.0124	34.0248	-14.7409	41.4819	-7.45706	FALSE
OG0000472	-8.861	23.722	-8.59877	29.1975	-5.47553	FALSE
OG0000473	-15.9484	37.8969	-14.1647	40.3295	-2.4326	FALSE
OG0000476	-3.02751	12.055	-2.83432	17.6686	-5.61363	FALSE
OG0000477	-18.3272	42.6544	-17.4425	46.885	-4.2306	FALSE
OG0000478	-12.9122	31.8243	-12.4337	36.8674	-5.04308	FALSE
OG0000479	-17.6641	41.3281	-21.7928	55.5856	-14.2575	FALSE
OG0000480	-17.018	40.0361	-16.4522	44.9043	-4.86826	FALSE
OG0000481	-15.8202	37.6405	-15.6437	43.2875	-5.64697	FALSE
OG0000482	-17.0451	40.0901	-15.7528	43.5056	-3.41545	FALSE
OG0000483	-18.2775	42.5551	-15.4727	42.9454	-0.390374	FALSE
OG0000484	-13.9019	33.8039	-13.1616	38.3233	-4.51941	FALSE
OG0000486	-19.3368	44.6736	-19.6535	51.307	-6.6334	FALSE
OG0000488	-11.9757	29.9514	-11.3968	34.7935	-4.84213	FALSE
OG0000489	-11.2845	28.569	-10.4633	32.9267	-4.35762	FALSE
OG0000490	-11.2621	28.5241	-10.2774	32.5547	-4.0306	FALSE
OG0000491	-14.1172	34.2345	-13.8114	39.6228	-5.38831	FALSE
OG0000492	-12.2865	30.573	-12.438	36.876	-6.30302	FALSE
OG0000495	-14.0402	34.0804	-12.8961	37.7921	-3.71176	FALSE
OG0000496	-20.9967	47.9933	-18.3982	48.7963	-0.803	FALSE
OG0000497	-18.4995	42.999	-19.1057	50.2114	-7.21241	FALSE
OG0000499	-9.89835	25.7967	-10.3237	32.6474	-6.85069	FALSE
OG0000500	-15.951	37.902	-16.8328	45.6655	-7.76355	FALSE
OG0000501	-16.5537	39.1075	-15.2959	42.5917	-3.48425	FALSE
OG0000502	-18.1434	42.2868	-18.2833	48.5665	-6.27969	FALSE
OG0000503	-12.6441	31.2882	-12.288	36.5761	-5.28785	FALSE
OG0000504	-11.9981	29.9962	-11.6021	35.2042	-5.208	FALSE
OG0000505	-18.9025	43.8051	-18.7522	49.5043	-5.69922	FALSE
OG0000506	-16.2189	38.4377	-15.4866	42.9731	-4.53543	FALSE
OG0000507	-13.2103	32.4206	-12.6685	37.337	-4.91644	FALSE
OG0000508	-12.3785	30.757	-11.378	34.7561	-3.99901	FALSE
OG0000509	-17.8037	41.6074	-16.0744	44.1488	-2.54145	FALSE
OG0000510	-17.6541	41.3082	-15.2715	42.5429	-1.23473	FALSE
OG0000511	-16.6108	39.2216	-18.1964	48.3927	-9.17111	FALSE
OG0000512	-19.2957	44.5914	-18.6358	49.2715	-4.68008	FALSE
OG0000513	-14.2182	34.4363	-10.9218	33.8435	0.592801	FALSE
OG0000515	-9.30494	24.6099	-8.18178	28.3636	-3.75367	FALSE
OG0000517	-12.9407	31.8814	-9.97441	31.9488	-0.0673968	FALSE
OG0000518	-19.4718	44.9435	-19.1174	50.2348	-5.29125	FALSE
OG0000519	-20.9041	47.8082	-21.2405	54.4811	-6.67283	FALSE
OG0000520	-18.2643	42.5287	-15.8249	43.6497	-1.12105	FALSE
OG0000521	-20.5223	47.0445	-20.3377	52.6754	-5.63084	FALSE
OG0000522	-6.62727	19.2545	-6.30494	24.6099	-5.35534	FALSE
OG0000523	-17.1485	40.2969	-18.0229	48.0459	-7.74897	FALSE
OG0000524	-18.8633	43.7265	-17.9453	47.8906	-4.16409	FALSE
OG0000526	-17.7554	41.5108	-15.1523	42.3046	-0.793827	FALSE
OG0000527	-15.128	36.2561	-15.1805	42.361	-6.10494	FALSE
OG0000528	-10.7473	27.4946	-10.0559	32.1119	-4.61729	FALSE
OG0000529	-16.2728	38.5455	-14.6038	41.2075	-2.66201	FALSE
OG0000530	-14.6929	35.3859	-12.9952	37.9903	-2.60444	FALSE
OG0000531	-22.9428	51.8856	-23.4545	58.909	-7.02342	FALSE
OG0000532	-13.3827	32.7655	-11.829	35.6581	-2.89262	FALSE
OG0000533	-18.8658	43.7316	-17.8764	47.7528	-4.0212	FALSE
OG0000535	-11.1141	28.2282	-8.22391	28.4478	-0.219621	FALSE
OG0000536	-9.49181	24.9836	-9.31273	30.6255	-5.64183	FALSE
OG0000538	-25.1846	56.3692	-23.0478	58.0957	-1.72651	FALSE
OG0000539	-21.3457	48.6913	-21.0898	54.1795	-5.4882	FALSE
OG0000540	-24.9277	55.8555	-21.0515	54.103	1.75251	FALSE
OG0000542	-13.2176	32.4353	-12.4854	36.9708	-4.53548	FALSE
OG0000543	-3.02751	12.055	-2.83432	17.6686	-5.61363	FALSE
OG0000544	-12.5871	31.1741	-11.7625	35.525	-4.35087	FALSE
OG0000545	-19.3944	44.7887	-19.4662	50.9323	-6.14362	FALSE
OG0000546	-6.57628	19.1526	-5.42705	22.8541	-3.70152	FALSE
OG0000547	-15.0834	36.1669	-15.2726	42.5452	-6.37833	FALSE
OG0000548	-12.2646	30.5291	-11.4081	34.8161	-4.287	FALSE
OG0000549	-15.5529	37.1059	-15.2623	42.5247	-5.41879	FALSE
OG0000550	-11.2085	28.417	-11.1451	34.2903	-5.87331	FALSE
OG0000551	-12.8202	31.6403	-11.5602	35.1205	-3.48015	FALSE
OG0000553	-9.57447	25.1489	-9.49385	30.9877	-5.83876	FALSE
OG0000554	-13.9679	33.9359	-16.5207	45.0413	-11.1054	FALSE
OG0000555	-12.4476	30.8952	-11.597	35.1939	-4.2987	FALSE
OG0000556	-20.1808	46.3617	-20.2735	52.5471	-6.18539	FALSE
OG0000557	-20.1313	46.2625	-19.04	50.08	-3.81742	FALSE
OG0000558	-15.5478	37.0955	-15.334	42.668	-5.5724	FALSE
OG0000559	-7.95923	21.9185	-7.8445	27.689	-5.77056	FALSE
OG0000560	-17.3235	40.6469	-21.2045	54.409	-13.7621	FALSE
OG0000561	-21.2779	48.5558	-18.8005	49.6009	-1.0451	FALSE
OG0000562	-12.8028	31.6057	-11.9596	35.9192	-4.31346	FALSE
OG0000563	-19.2923	44.5845	-18.2331	48.4663	-3.88176	FALSE
OG0000564	-16.3133	38.6265	-16.3257	44.6514	-6.02489	FALSE
OG0000565	-19.7336	45.4672	-19.3636	50.7272	-5.26	FALSE
OG0000566	-16.0575	38.115	-15.7317	43.4635	-5.34845	FALSE
OG0000567	-11.987	29.9739	-12.144	36.2881	-6.31415	FALSE
OG0000568	-17.0761	40.1522	-20.3175	52.6349	-12.4828	FALSE
OG0000569	-15.8523	37.7045	-14.0588	40.1176	-2.41306	FALSE
OG0000570	-15.567	37.134	-16.1021	44.2042	-7.07018	FALSE
OG0000572	-20.2304	46.4608	-19.8608	51.7217	-5.26088	FALSE
OG0000573	-8.04446	22.0889	-6.87277	25.7455	-3.65661	FALSE
OG0000574	-11.9679	29.9358	-12.1505	36.301	-6.36528	FALSE
OG0000575	-8.86891	23.7378	-8.70092	29.4018	-5.66402	FALSE
OG0000576	-9.6486	25.2972	-9.60045	31.2009	-5.9037	FALSE
OG0000577	-15.1048	36.2095	-12.5069	37.0138	-0.804267	FALSE
OG0000580	-16.3278	38.6557	-16.4017	44.8034	-6.1477	FALSE
OG0000581	-10.7603	27.5205	-11.813	35.626	-8.10551	FALSE
OG0000582	-5.32008	16.6402	-5.69645	23.3929	-6.75275	FALSE
OG0000583	-17.4289	40.8578	-17.922	47.844	-6.9862	FALSE
OG0000584	-13.2734	32.5468	-10.149	32.298	0.24873	FALSE
OG0000586	-9.79136	25.5827	-10.2747	32.5493	-6.96661	FALSE
OG0000587	-12.5559	31.1118	-11.234	34.468	-3.35615	FALSE
OG0000588	-16.1074	38.2148	-20.3315	52.663	-14.4482	FALSE
OG0000589	-13.5926	33.1852	-12.6928	37.3856	-4.20033	FALSE
OG0000590	-17.8842	41.7684	-18.2312	48.4623	-6.69392	FALSE
OG0000591	-17.6563	41.3126	-20.9876	53.9752	-12.6626	FALSE
OG0000592	-11.2159	28.4318	-10.5937	33.1873	-4.75556	FALSE
OG0000593	-14.3453	34.6906	-15.6926	43.3853	-8.69462	FALSE
OG0000594	-4.83045	15.6609	-4.35168	20.7034	-5.04247	FALSE
OG0000595	-12.9428	31.8856	-13.4375	38.875	-6.98938	FALSE
OG0000596	-15.84	37.6801	-18.4108	48.8216	-11.1415	FALSE
OG0000597	-12.2818	30.5636	-12.4297	36.8594	-6.29573	FALSE
OG0000598	-17.6833	41.3667	-13.8988	39.7976	1.56908	FALSE
OG0000599	-11.0384	28.0767	-10.6388	33.2776	-5.2009	FALSE
OG0000600	-21.0224	48.0447	-17.6388	47.2775	0.767188	FALSE
OG0000602	-10.2735	26.5469	-9.88122	31.7624	-5.2155	FALSE
OG0000603	-17.5151	41.0301	-16.7025	45.405	-4.37483	FALSE
OG0000604	-13.3719	32.7438	-13.1662	38.3325	-5.58871	FALSE
OG0000605	-12.8898	31.7796	-10.5986	33.1971	-1.41759	FALSE
OG0000606	-20.5953	47.1907	-19.2559	50.5118	-3.32107	FALSE
OG0000608	-16.5321	39.0642	-15.1281	42.2562	-3.19202	FALSE
OG0000609	-16.1928	38.3857	-14.4459	40.8918	-2.50611	FALSE
OG0000610	-21.9019	49.8039	-20.2604	52.5207	-2.71684	FALSE
OG0000612	-16.8038	39.6076	-15.6627	43.3253	-3.71771	FALSE
OG0000613	-13.7649	33.5298	-13.6782	39.3563	-5.82655	FALSE
OG0000614	-17.4737	40.9474	-15.5881	43.1761	-2.22874	FALSE
OG0000615	-14.321	34.6419	-13.2421	38.4841	-3.84219	FALSE
OG0000617	-14.7468	35.4937	-14.0712	40.1423	-4.64863	FALSE
OG0000618	-18.8671	43.7343	-18.1592	48.3184	-4.58409	FALSE
OG0000619	-3.02751	12.055	-2.83432	17.6686	-5.61363	FALSE
OG0000620	-11.5176	29.0352	-11.1069	34.2137	-5.17851	FALSE
OG0000621	-12.281	30.5621	-12.1777	36.3553	-5.79324	FALSE
OG0000623	-7.46731	20.9346	-8.0714	28.1428	-7.20818	FALSE
OG0000624	-12.5574	31.1148	-12.6715	37.343	-6.22816	FALSE
OG0000625	-19.4357	44.8714	-18.964	49.9279	-5.05649	FALSE
OG0000626	-11.2085	28.417	-11.1451	34.2903	-5.87331	FALSE
OG0000627	-11.2978	28.5956	-10.7187	33.4373	-4.84172	FALSE
OG0000628	-7.50508	21.0102	-6.92358	25.8472	-4.83701	FALSE
OG0000629	-15.3804	36.7608	-19.115	50.23	-13.4692	FALSE
OG0000630	-18.6763	43.3525	-18.8359	49.6717	-6.3192	FALSE
OG0000631	-14.6073	35.2146	-14.1041	40.2082	-4.99365	FALSE
OG0000632	-12.1765	30.353	-12.3558	36.7116	-6.35854	FALSE
OG0000633	-15.6664	37.3329	-15.9623	43.9245	-6.59163	FALSE
OG0000634	-9.35541	24.7108	-8.86009	29.7202	-5.00936	FALSE
OG0000635	-14.1285	34.257	-13.6605	39.321	-5.06402	FALSE
OG0000636	-10.5378	27.0755	-7.97482	27.9496	-0.874123	FALSE
OG0000637	-23.6357	53.2714	-23.4117	58.8233	-5.55198	FALSE
OG0000638	-16.7432	39.4863	-15.9621	43.9241	-4.43782	FALSE
OG0000639	-14.4351	34.8703	-11.5423	35.0846	-0.214302	FALSE
OG0000640	-24.5242	55.0485	-22.3266	56.6532	-1.6047	FALSE
OG0000641	-17.5538	41.1076	-21.058	54.116	-13.0084	FALSE
OG0000643	-13.0004	32.0008	-14.6036	41.2071	-9.20637	FALSE
OG0000644	-10.4895	26.979	-10.493	32.986	-6.00704	FALSE
OG0000645	-13.8468	33.6936	-13.194	38.388	-4.69442	FALSE
OG0000646	-10.0673	26.1346	-8.2836	28.5672	-2.43255	FALSE
OG0000647	-12.8045	31.609	-11.5613	35.1227	-3.51368	FALSE
OG0000648	-17.6194	41.2388	-14.3067	40.6134	0.625397	FALSE
OG0000649	-8.88951	23.779	-7.35676	26.7135	-2.93449	FALSE
OG0000650	-7.82209	21.6442	-7.99239	27.9848	-6.3406	FALSE
OG0000651	-17.1202	40.2404	-16.6458	45.2916	-5.05121	FALSE
OG0000652	-15.0445	36.089	-15.9877	43.9755	-7.88651	FALSE
OG0000653	-11.6367	29.2735	-10.2267	32.4535	-3.17999	FALSE
OG0000654	-14.6223	35.2445	-14.7529	41.5058	-6.26124	FALSE
OG0000655	-12.1236	30.2472	-10.1515	32.3031	-2.05586	FALSE
OG0000656	-18.523	43.0461	-16.5482	45.0964	-2.05032	FALSE
OG0000657	-16.793	39.5861	-15.7818	43.5635	-3.97745	FALSE
OG0000659	-12.0953	30.1906	-11.9782	35.9563	-5.76575	FALSE
OG0000660	-8.65855	23.3171	-8.59865	29.1973	-5.88021	FALSE
OG0000661	-14.2067	34.4134	-11.1393	34.2785	0.134838	FALSE
OG0000662	-11.8889	29.7778	-10.8034	33.6068	-3.82901	FALSE
OG0000663	-14.8541	35.7081	-15.2987	42.5974	-6.88926	FALSE
OG0000664	-10.9865	27.973	-7.54955	27.0991	0.873858	FALSE
OG0000665	-15.5826	37.1653	-12.2354	36.4708	0.694476	FALSE
OG0000666	-15.398	36.7961	-14.0275	40.0551	-3.25898	FALSE
OG0000667	-10.4034	26.8067	-10.0045	32.0091	-5.20234	FALSE
OG0000668	-16.8618	39.7237	-16.5469	45.0939	-5.37019	FALSE
OG0000669	-11.5824	29.1649	-10.9738	33.9477	-4.78276	FALSE
OG0000670	-17.9822	41.9644	-21.6353	55.2707	-13.3063	FALSE
OG0000671	-12.2367	30.4735	-9.2517	30.5034	-0.0299498	FALSE
OG0000673	-15.3812	36.7623	-16.4767	44.9533	-8.19102	FALSE
OG0000674	-10.0142	26.0284	-9.15318	30.3064	-4.278	FALSE
OG0000675	-18.8775	43.755	-18.184	48.3681	-4.61312	FALSE
OG0000676	-12.8174	31.6348	-9.22718	30.4544	1.18046	FALSE
OG0000677	-13.3498	32.6996	-13.5997	39.1995	-6.49989	FALSE
OG0000678	-12.3097	30.6194	-12.6192	37.2385	-6.61911	FALSE
OG0000679	-14.4371	34.8741	-12.8988	37.7976	-2.92347	FALSE
OG0000680	-7.28754	20.5751	-6.88565	25.7713	-5.19623	FALSE
OG0000681	-9.79968	25.5994	-8.27414	28.5483	-2.9489	FALSE
OG0000682	-7.17841	20.3568	-7.22013	26.4403	-6.08343	FALSE
OG0000684	-9.09835	24.1967	-8.57783	29.1557	-4.95898	FALSE
OG0000685	-15.9293	37.8586	-15.8347	43.6694	-5.81076	FALSE
OG0000686	-11.2149	28.4298	-10.2511	32.5021	-4.07235	FALSE
OG0000687	-15.5759	37.1517	-13.8494	39.6988	-2.54709	FALSE
OG0000688	-16.6264	39.2529	-21.214	54.428	-15.1751	FALSE
OG0000689	-10.4702	26.9404	-10.1633	32.3266	-5.38623	FALSE
OG0000690	-15.9891	37.9781	-15.29	42.5801	-4.60197	FALSE
OG0000691	-9.29172	24.5834	-8.34301	28.686	-4.10256	FALSE
OG0000692	-16.5976	39.1952	-16.7236	45.4471	-6.25196	FALSE
OG0000693	-17.3491	40.6983	-19.4906	50.9812	-10.2829	FALSE
OG0000694	-13.7744	33.5489	-13.7089	39.4177	-5.86888	FALSE
OG0000695	-13.9154	33.8308	-14.9601	41.9203	-8.08941	FALSE
OG0000696	-12.2561	30.5122	-11.3746	34.7492	-4.23696	FALSE
OG0000697	-24.6508	55.3017	-24.2005	60.4009	-5.09927	FALSE
OG0000698	-17.8506	41.7011	-16.3237	44.6473	-2.9462	FALSE
OG0000699	-8.3637	22.7274	-8.58868	29.1774	-6.44995	FALSE
OG0000700	-22.4788	50.9577	-21.7104	55.4209	-4.46322	FALSE
OG0000701	-6.62727	19.2545	-6.30494	24.6099	-5.35534	FALSE
OG0000702	-11.186	28.3719	-11.0873	34.1747	-5.80274	FALSE
OG0000703	-17.656	41.3121	-17.7311	47.4622	-6.15018	FALSE
OG0000704	-18.592	43.184	-22.3542	56.7084	-13.5244	FALSE
OG0000705	-18.3006	42.6012	-18.7002	49.4005	-6.7993	FALSE
OG0000706	-11.0792	28.1584	-10.74	33.4799	-5.32153	FALSE
OG0000709	-18.0238	42.0476	-17.3768	46.7537	-4.70605	FALSE
OG0000710	-13.3335	32.6669	-12.486	36.9719	-4.30498	FALSE
OG0000711	-18.9893	43.9786	-18.2105	48.4211	-4.44248	FALSE
OG0000712	-13.37	32.7401	-13.0861	38.1722	-5.43206	FALSE
OG0000713	-18.0691	42.1382	-14.8682	41.7363	0.401906	FALSE
OG0000714	-12.2763	30.5526	-11.4786	34.9572	-4.40459	FALSE
OG0000715	-15.3984	36.7967	-16.1033	44.2066	-7.40987	FALSE
OG0000716	-17.684	41.3679	-16.6589	45.3178	-3.94986	FALSE
OG0000717	-12.2203	30.4407	-11.9879	35.9759	-5.53517	FALSE
OG0000718	-11.6083	29.2166	-10.9658	33.9316	-4.71497	FALSE
OG0000719	-9.8684	25.7368	-9.61001	31.22	-5.48321	FALSE
OG0000720	-15.3891	36.7781	-15.443	42.886	-6.10783	FALSE
OG0000721	-17.3366	40.6732	-17.0269	46.0537	-5.38049	FALSE
OG0000722	-17.3234	40.6467	-18.3238	48.6477	-8.00091	FALSE
OG0000723	-10.7227	27.4454	-9.91741	31.8348	-4.3894	FALSE
OG0000724	-13.9398	33.8796	-13.908	39.816	-5.93643	FALSE
OG0000726	-7.3745	20.749	-6.9603	25.9206	-5.1716	FALSE
OG0000727	-15.6369	37.2737	-13.9489	39.8978	-2.62411	FALSE
OG0000728	-11.3065	28.613	-10.5701	33.1402	-4.52727	FALSE
OG0000730	-14.7564	35.5127	-12.224	36.448	-0.935285	FALSE
OG0000731	-15.1485	36.297	-15.2915	42.5829	-6.28598	FALSE
OG0000732	-12.682	31.364	-13.1696	38.3392	-6.97518	FALSE
OG0000734	-6.04556	18.0911	-6.04666	24.0933	-6.00219	FALSE
OG0000735	-15.7847	37.5693	-16.5754	45.1508	-7.58142	FALSE
OG0000737	-12.4342	30.8684	-10.9386	33.8772	-3.00872	FALSE
OG0000738	-11.4861	28.9722	-11.4251	34.8503	-5.87806	FALSE
OG0000739	-8.67036	23.3407	-7.63572	27.2714	-3.93071	FALSE
OG0000740	-11.927	29.854	-13.6619	39.3239	-9.4699	FALSE
OG0000741	-12.0046	30.0092	-11.0559	34.1117	-4.10248	FALSE
OG0000742	-13.5697	33.1393	-11.2235	34.447	-1.30766	FALSE
OG0000743	-12.7164	31.4328	-12.5097	37.0195	-5.58663	FALSE
OG0000744	-17.9226	41.8452	-16.9352	45.8704	-4.02518	FALSE
OG0000745	-9.50985	25.0197	-10.14	32.2801	-7.26035	FALSE
OG0000746	-17.6293	41.2586	-14.3578	40.7156	0.542981	FALSE
OG0000747	-13.0001	32.0003	-12.4129	36.8259	-4.82559	FALSE
OG0000748	-16.5856	39.1711	-15.6441	43.2882	-4.11709	FALSE
OG0000749	-18.3042	42.6083	-17.8187	47.6375	-5.02911	FALSE
OG0000750	-12.1888	30.3775	-11.833	35.6659	-5.2884	FALSE
OG0000751	-13.9602	33.9204	-17.8232	47.6464	-13.726	FALSE
OG0000752	-16.3692	38.7383	-15.5771	43.1542	-4.41587	FALSE
OG0000753	-15.5134	37.0267	-15.6449	43.2898	-6.26308	FALSE
OG0000754	-11.6842	29.3685	-11.0906	34.1812	-4.81275	FALSE
OG0000755	-12.5546	31.1092	-12.6773	37.3547	-6.24544	FALSE
OG0000757	-22.1859	50.3718	-20.1439	52.2878	-1.91593	FALSE
OG0000758	-14.1058	34.2117	-11.6557	35.3113	-1.09967	FALSE
OG0000760	-17.02	40.04	-16.9499	45.8998	-5.85976	FALSE
OG0000761	-12.1798	30.3595	-11.6372	35.2744	-4.9149	FALSE
OG0000762	-8.09812	22.1962	-7.88342	27.7668	-5.57059	FALSE
OG0000763	-21.6851	49.3703	-20.2315	52.463	-3.09273	FALSE
OG0000764	-15.3088	36.6175	-13.4854	38.9709	-2.35333	FALSE
OG0000765	-14.0834	34.1669	-13.0188	38.0375	-3.87069	FALSE
OG0000766	-10.4336	26.8671	-10.3746	32.7492	-5.88206	FALSE
OG0000767	-10.9553	27.9105	-9.23901	30.478	-2.5675	FALSE
OG0000768	-14.7164	35.4329	-14.3633	40.7267	-5.29377	FALSE
OG0000769	-15.3349	36.6698	-12.7329	37.4658	-0.796029	FALSE
OG0000770	-17.1763	40.3526	-17.0184	46.0368	-5.68416	FALSE
OG0000771	-14.5074	35.0149	-12.656	37.3119	-2.29703	FALSE
OG0000772	-10.6454	27.2907	-8.92188	29.8438	-2.55304	FALSE
OG0000773	-11.7509	29.5017	-11.7362	35.4723	-5.97062	FALSE
OG0000774	-16.5027	39.0054	-15.459	42.918	-3.91261	FALSE
OG0000775	-9.04006	24.0801	-9.90428	31.8086	-7.72844	FALSE
OG0000776	-10.7089	27.4178	-10.3707	32.7414	-5.32359	FALSE
OG0000777	-12.5129	31.0258	-11.1652	34.3304	-3.30455	FALSE
OG0000778	-15.1948	36.3895	-15.026	42.052	-5.66244	FALSE
OG0000780	-6.03975	18.0795	-5.39891	22.7978	-4.71833	FALSE
OG0000781	-10.429	26.8579	-10.5131	33.0263	-6.16838	FALSE
OG0000782	-19.5918	45.1836	-20.0614	52.1227	-6.93912	FALSE
OG0000783	-10.3465	26.693	-9.10832	30.2166	-3.52362	FALSE
OG0000784	-21.6704	49.3408	-17.7252	47.4504	1.89046	FALSE
OG0000785	-18.551	43.1019	-17.5222	47.0444	-3.94247	FALSE
OG0000786	-12.7903	31.5806	-8.91835	29.8367	1.74389	FALSE
OG0000788	-15.1009	36.2018	-13.9668	39.9336	-3.7318	FALSE
OG0000789	-17.1704	40.3408	-17.0175	46.035	-5.69414	FALSE
OG0000790	-18.3435	42.6871	-16.7452	45.4905	-2.80342	FALSE
OG0000791	-15.2769	36.5538	-16.1444	44.2889	-7.73506	FALSE
OG0000793	-7.58702	21.174	-7.01882	26.0376	-4.86361	FALSE
OG0000794	-14.5293	35.0586	-15.6886	43.3771	-8.31859	FALSE
OG0000795	-12.825	31.6499	-16.4512	44.9025	-13.2526	FALSE
OG0000796	-15.6069	37.2138	-19.1722	50.3445	-13.1307	FALSE
OG0000797	-14.5542	35.1083	-13.9095	39.819	-4.71063	FALSE
OG0000798	-6.44276	18.8855	-7.36317	26.7263	-7.84081	FALSE
OG0000799	-14.5129	35.0258	-15.0762	42.1524	-7.12657	FALSE
OG0000800	-16.6111	39.2223	-15.5342	43.0683	-3.84602	FALSE
OG0000801	-18.4678	42.9357	-17.7585	47.517	-4.58135	FALSE
OG0000802	-17.6159	41.2318	-15.1363	42.2727	-1.04088	FALSE
OG0000803	-15.4664	36.9329	-14.1673	40.3346	-3.40177	FALSE
OG0000804	-14.6434	35.2868	-13.127	38.254	-2.96719	FALSE
OG0000805	-11.547	29.0941	-9.96887	31.9377	-2.84368	FALSE
OG0000806	-25.2069	56.4138	-25.2101	62.4202	-6.00634	FALSE
OG0000807	-10.8777	27.7554	-9.81161	31.6232	-3.86777	FALSE
OG0000808	-16.0802	38.1604	-16.1007	44.2014	-6.041	FALSE
OG0000809	-14.8499	35.6998	-14.8972	41.7944	-6.0946	FALSE
OG0000810	-8.03345	22.0669	-7.46432	26.9286	-4.86173	FALSE
OG0000811	-14.1213	34.2425	-12.5097	37.0195	-2.77691	FALSE
OG0000812	-10.4062	26.8125	-9.2043	30.4086	-3.59615	FALSE
OG0000813	-13.0491	32.0982	-12.4607	36.9215	-4.82331	FALSE
OG0000814	-12.2239	30.4478	-11.3764	34.7527	-4.3049	FALSE
OG0000815	-15.4063	36.8127	-15.1069	42.2137	-5.40105	FALSE
OG0000816	-9.74958	25.4992	-9.14299	30.286	-4.78681	FALSE
OG0000817	-17.7593	41.5186	-15.2955	42.591	-1.07241	FALSE
OG0000818	-14.2186	34.4373	-14.6983	41.3966	-6.95926	FALSE
OG0000819	-9.84781	25.6956	-9.86435	31.7287	-6.03308	FALSE
OG0000820	-14.1522	34.3044	-13.313	38.626	-4.32164	FALSE
OG0000821	-11.8182	29.6364	-11.062	34.1241	-4.48765	FALSE
OG0000822	-15.8726	37.7452	-14.0797	40.1594	-2.4142	FALSE
OG0000823	-22.7368	51.4736	-19.3595	50.719	0.754591	FALSE
OG0000824	-14.6044	35.2089	-11.5749	35.1497	0.0591837	FALSE
OG0000825	-8.78159	23.5632	-7.12789	26.2558	-2.69261	FALSE
OG0000826	-18.7709	43.5418	-17.7486	47.4973	-3.95551	FALSE
OG0000827	-10.4823	26.9645	-10.2325	32.465	-5.50052	FALSE
OG0000828	-12.8705	31.741	-12.03	36.06	-4.31899	FALSE
OG0000829	-16.9763	39.9526	-18.1965	48.393	-8.44042	FALSE
OG0000830	-14.3219	34.6437	-12.3149	36.6298	-1.98603	FALSE
OG0000831	-17.1965	40.3931	-15.6496	43.2993	-2.90619	FALSE
OG0000832	-16.2687	38.5375	-14.6187	41.2373	-2.69986	FALSE
OG0000833	-14.9745	35.9489	-16.0461	44.0921	-8.14318	FALSE
OG0000835	-13.2886	32.5772	-13.2382	38.4763	-5.89913	FALSE
OG0000836	-14.8717	35.7434	-12.0273	36.0547	-0.311237	FALSE
OG0000837	-13.5365	33.0731	-13.4043	38.8086	-5.73554	FALSE
OG0000838	-17.8981	41.7962	-15.6356	43.2712	-1.47494	FALSE
OG0000839	-6.04556	18.0911	-6.04666	24.0933	-6.00219	FALSE
OG0000840	-15.3992	36.7985	-13.2085	38.417	-1.61849	FALSE
OG0000842	-11.1801	28.3601	-8.9957	29.9914	-1.63127	FALSE
OG0000843	-9.53816	25.0763	-8.43512	28.8702	-3.79393	FALSE
OG0000844	-10.0547	26.1094	-9.06825	30.1365	-4.02707	FALSE
OG0000845	-19.068	44.136	-16.2407	44.4814	-0.34544	FALSE
OG0000846	-17.4855	40.9709	-17.7804	47.5608	-6.58985	FALSE
OG0000847	-13.4298	32.8595	-12.8679	37.7357	-4.87617	FALSE
OG0000848	-7.72377	21.4475	-8.47774	28.9555	-7.50795	FALSE
OG0000851	-17.8703	41.7405	-14.8578	41.7157	0.0248697	FALSE
OG0000852	-17.4174	40.8348	-15.1531	42.3063	-1.47148	FALSE
OG0000853	-14.62	35.24	-17.561	47.1221	-11.882	FALSE
OG0000854	-19.4718	44.9435	-18.6314	49.2628	-4.31929	FALSE
OG0000855	-13.3976	32.7951	-12.8163	37.6326	-4.8375	FALSE
OG0000856	-13.7388	33.4776	-15.5049	43.0099	-9.53225	FALSE
OG0000860	-17.0803	40.1607	-16.7583	45.5166	-5.35595	FALSE
OG0000861	-5.23065	16.4613	-5.14171	22.2834	-5.82213	FALSE
OG0000862	-13.7744	33.5489	-13.9565	39.9129	-6.36405	FALSE
OG0000863	-13.541	33.0819	-12.1658	36.3316	-3.24969	FALSE
OG0000864	-14.5908	35.1816	-12.5024	37.0049	-1.82325	FALSE
OG0000865	-14.8312	35.6624	-14.2514	40.5028	-4.84036	FALSE
OG0000866	-16.5709	39.1418	-18.8983	49.7966	-10.6548	FALSE
OG0000867	-9.92602	25.852	-7.44501	26.89	-1.03798	FALSE
OG0000868	-8.51831	23.0366	-7.21499	26.43	-3.39336	FALSE
OG0000869	-19.5193	45.0386	-18.5167	49.0335	-3.99489	FALSE
OG0000870	-15.0317	36.0634	-12.4253	36.8506	-0.787249	FALSE
OG0000871	-13.0504	32.1007	-15.9706	43.9412	-11.8404	FALSE
OG0000872	-16.2637	38.5273	-15.6652	43.3305	-4.80315	FALSE
OG0000873	-15.7138	37.4275	-15.3605	42.7209	-5.29341	FALSE
OG0000874	-13.391	32.782	-10.7327	33.4653	-0.683356	FALSE
OG0000876	-11.2174	28.4347	-8.99822	29.9964	-1.56172	FALSE
OG0000877	-12.2678	30.5355	-12.1089	36.2178	-5.68233	FALSE
OG0000879	-4.83045	15.6609	-4.35168	20.7034	-5.04247	FALSE
OG0000880	-8.90932	23.8186	-8.68201	29.364	-5.54538	FALSE
OG0000881	-23.2549	52.5099	-23.0762	58.1524	-5.64253	FALSE
OG0000882	-13.407	32.8141	-13.0804	38.1608	-5.34672	FALSE
OG0000883	-20.8987	47.7974	-19.7714	51.5428	-3.74548	FALSE
OG0000884	-8.861	23.722	-8.59877	29.1975	-5.47553	FALSE
OG0000885	-14.483	34.966	-14.6482	41.2964	-6.33048	FALSE
OG0000886	-12.4422	30.8845	-12.7288	37.4577	-6.57321	FALSE
OG0000887	-11.252	28.504	-11.7182	35.4365	-6.93246	FALSE
OG0000888	-14.3412	34.6823	-14.3329	40.6657	-5.98344	FALSE
OG0000889	-13.3976	32.7951	-12.8163	37.6326	-4.8375	FALSE
OG0000890	-10.0187	26.0375	-9.39367	30.7873	-4.74984	FALSE
OG0000891	-16.2455	38.491	-14.0048	40.0095	-1.51845	FALSE
OG0000892	-17.0221	40.0441	-15.057	42.1141	-2.06993	FALSE
OG0000893	-12.131	30.2621	-11.934	35.8681	-5.60599	FALSE
OG0000894	-16.0894	38.1789	-14.2238	40.4477	-2.26881	FALSE
OG0000895	-9.40071	24.8014	-8.28272	28.5654	-3.76402	FALSE
OG0000896	-14.9781	35.9563	-13.6096	39.2191	-3.26289	FALSE
OG0000898	-21.85	49.6999	-19.6539	51.3079	-1.60794	FALSE
OG0000899	-8.42629	22.8526	-9.03248	30.065	-7.21239	FALSE
OG0000900	-15.2351	36.4702	-13.1264	38.2529	-1.78268	FALSE
OG0000901	-14.5474	35.0948	-13.769	39.538	-4.44316	FALSE
OG0000902	-16.0274	38.0549	-16.4928	44.9857	-6.93079	FALSE
OG0000903	-15.2764	36.5527	-14.8703	41.7406	-5.18787	FALSE
OG0000904	-16.4436	38.8873	-15.2395	42.479	-3.59174	FALSE
OG0000905	-13.26	32.5199	-15.8673	43.7346	-11.2147	FALSE
OG0000907	-13.4605	32.921	-11.8418	35.6836	-2.76258	FALSE
OG0000908	-17.3773	40.7546	-17.6676	47.3353	-6.58068	FALSE
OG0000909	-12.9751	31.9501	-12.3012	36.6025	-4.65237	FALSE
OG0000910	-10.8638	27.7276	-9.9816	31.9632	-4.23565	FALSE
OG0000911	-20.7991	47.5983	-20.1759	52.3517	-4.75342	FALSE
OG0000912	-10.7729	27.5458	-11.7152	35.4303	-7.88455	FALSE
OG0000913	-14.2561	34.5123	-13.916	39.832	-5.31975	FALSE
OG0000914	-11.072	28.144	-9.2374	30.4748	-2.33083	FALSE
OG0000915	-9.25928	24.5186	-6.94093	25.8819	-1.3633	FALSE
OG0000916	-8.43417	22.8683	-8.53147	29.0629	-6.19459	FALSE
OG0000917	-20.7374	47.4748	-20.7108	53.4216	-5.94684	FALSE
OG0000918	-11.8284	29.6568	-13.5119	39.0237	-9.36696	FALSE
OG0000919	-14.0901	34.1802	-12.5319	37.0637	-2.88349	FALSE
OG0000920	-4.83045	15.6609	-4.35168	20.7034	-5.04247	FALSE
OG0000921	-15.8715	37.743	-16.2654	44.5308	-6.78777	FALSE
OG0000922	-10.3449	26.6898	-9.97525	31.9505	-5.26071	FALSE
OG0000923	-17.5559	41.1117	-15.192	42.384	-1.27228	FALSE
OG0000924	-10.3032	26.6064	-10.147	32.2939	-5.68749	FALSE
OG0000925	-8.23002	22.46	-7.85717	27.7143	-5.25429	FALSE
OG0000926	-10.0052	26.0104	-10.12	32.2399	-6.2295	FALSE
OG0000927	-15.2893	36.5785	-12.4501	36.9003	-0.321758	FALSE
OG0000928	-13.0195	32.039	-10.2732	32.5465	-0.507472	FALSE
OG0000929	-11.5772	29.1543	-11.0573	34.1146	-4.96025	FALSE
OG0000930	-16.9391	39.8782	-19.87	51.7401	-11.8619	FALSE
OG0000931	-11.6029	29.2058	-10.5941	33.1882	-3.98237	FALSE
OG0000932	-8.78159	23.5632	-7.60611	27.2122	-3.64904	FALSE
OG0000933	-7.08087	20.1617	-7.29427	26.5885	-6.42679	FALSE
OG0000934	-17.8218	41.6436	-16.3759	44.7518	-3.10825	FALSE
OG0000935	-13.568	33.1359	-12.2074	36.4149	-3.27897	FALSE
OG0000936	-3.02751	12.055	-2.83432	17.6686	-5.61363	FALSE
OG0000937	-10.0784	26.1567	-10.2013	32.4026	-6.24584	FALSE
OG0000938	-9.65443	25.3089	-9.36431	30.7286	-5.41976	FALSE
OG0000939	-15.9661	37.9321	-15.9025	43.8051	-5.87297	FALSE
OG0000940	-12.9375	31.8749	-14.6921	41.3843	-9.50932	FALSE
OG0000941	-15.2374	36.4749	-17.2801	46.5603	-10.0854	FALSE
OG0000942	-18.1838	42.3676	-18.4027	48.8054	-6.43784	FALSE
OG0000943	-15.6551	37.3103	-12.9558	37.9116	-0.601328	FALSE
OG0000944	-12.5219	31.0439	-12.4176	36.8352	-5.79134	FALSE
OG0000946	-16.0256	38.0513	-14.4285	40.8569	-2.80566	FALSE
OG0000947	-9.9973	25.9946	-10.0756	32.1512	-6.15656	FALSE
OG0000948	-15.5479	37.0959	-13.133	38.2659	-1.17004	FALSE
OG0000949	-14.9538	35.9076	-13.9626	39.9253	-4.01772	FALSE
OG0000950	-10.3512	26.7025	-10.4505	32.901	-6.19851	FALSE
OG0000951	-12.1394	30.2788	-10.307	32.6139	-2.33516	FALSE
OG0000952	-12.9949	31.9898	-12.065	36.13	-4.14024	FALSE
OG0000953	-19.1038	44.2076	-17.8534	47.7068	-3.4992	FALSE
OG0000954	-20.1058	46.2115	-19.8937	51.7873	-5.5758	FALSE
OG0000956	-15.5914	37.1828	-16.5844	45.1688	-7.98596	FALSE
OG0000957	-4.19256	14.3851	-4.47248	20.945	-6.55984	FALSE
OG0000958	-12.8042	31.6083	-12.9045	37.809	-6.20063	FALSE
OG0000959	-11.5792	29.1584	-11.0628	34.1256	-4.96724	FALSE
OG0000960	-5.16345	16.3269	-4.60593	21.2119	-4.88495	FALSE
OG0000961	-16.0802	38.1603	-15.6692	43.3384	-5.17802	FALSE
OG0000962	-4.83045	15.6609	-4.35168	20.7034	-5.04247	FALSE
OG0000964	-13.138	32.276	-13.7969	39.5939	-7.31791	FALSE
OG0000966	-16.5083	39.0166	-14.07	40.14	-1.12339	FALSE
OG0000967	-15.8821	37.7642	-14.6617	41.3234	-3.55921	FALSE
OG0000968	-10.6857	27.3713	-11.3911	34.7823	-7.41092	FALSE
OG0000969	-15.078	36.1559	-14.7282	41.4564	-5.3005	FALSE
OG0000970	-18.7839	43.5678	-18.6865	49.373	-5.80526	FALSE
OG0000971	-14.9708	35.9416	-13.1077	38.2154	-2.27382	FALSE
OG0000972	-21.2909	48.5819	-20.4028	52.8056	-4.22372	FALSE
OG0000973	-11.0701	28.1403	-11.0541	34.1082	-5.96795	FALSE
OG0000976	-15.179	36.3581	-11.424	34.848	1.51006	FALSE
OG0000978	-17.9851	41.9701	-15.5809	43.1618	-1.19169	FALSE
OG0000979	-16.7351	39.4702	-14.7572	41.5145	-2.04425	FALSE
OG0000981	-13.8813	33.7627	-13.2921	38.5843	-4.82161	FALSE
OG0000983	-16.6107	39.2213	-14.5154	41.0307	-1.8094	FALSE
OG0000984	-7.57213	21.1443	-7.01947	26.0389	-4.89468	FALSE
OG0000985	-10.7377	27.4753	-10.3766	32.7533	-5.27796	FALSE
OG0000987	-13.2745	32.549	-12.9168	37.8336	-5.28455	FALSE
OG0000988	-11.5086	29.0173	-9.26812	30.5362	-1.51896	FALSE
OG0000989	-14.7869	35.5739	-12.3541	36.7082	-1.13432	FALSE
OG0000990	-12.215	30.43	-11.465	34.9301	-4.50014	FALSE
OG0000991	-7.51496	21.0299	-6.73506	25.4701	-4.4402	FALSE
OG0000992	-11.0442	28.0884	-10.9038	33.8076	-5.71923	FALSE
OG0000993	-15.8803	37.7607	-15.4868	42.9736	-5.21296	FALSE
OG0000994	-11.8034	29.6068	-11.3808	34.7616	-5.15474	FALSE
OG0000995	-10.3796	26.7591	-8.80591	29.6118	-2.85269	FALSE
OG0000996	-17.7593	41.5186	-17.0135	46.027	-4.50843	FALSE
OG0000998	-11.9491	29.8981	-9.30107	30.6021	-0.704041	FALSE
OG0000999	-14.7938	35.5877	-17.4846	46.9692	-11.3816	FALSE
OG0001000	-14.6096	35.2191	-14.1745	40.3489	-5.12981	FALSE
OG0001001	-7.53196	21.0639	-8.14633	28.2927	-7.22874	FALSE
OG0001002	-4.83045	15.6609	-4.35168	20.7034	-5.04247	FALSE
OG0001003	-9.80353	25.6071	-9.95634	31.9127	-6.30562	FALSE
OG0001004	-10.3828	26.7657	-10.6962	33.3924	-6.62668	FALSE
OG0001005	-18.3953	42.7907	-18.5263	49.0526	-6.26198	FALSE
OG0001006	-17.7312	41.4625	-15.8033	43.6065	-2.14406	FALSE
OG0001007	-13.2737	32.5473	-12.6879	37.3759	-4.82854	FALSE
OG0001008	-13.0541	32.1082	-10.9982	33.9965	-1.88828	FALSE
OG0001009	-12.5839	31.1679	-11.1363	34.2727	-3.1048	FALSE
OG0001010	-13.6852	33.3703	-13.2022	38.4044	-5.0341	FALSE
OG0001012	-14.4632	34.9263	-14.2136	40.4272	-5.50085	FALSE
OG0001013	-13.0872	32.1744	-12.3842	36.7683	-4.59394	FALSE
OG0001014	-18.5961	43.1923	-14.6133	41.2265	1.96576	FALSE
OG0001016	-8.05786	22.1157	-8.40313	28.8063	-6.69055	FALSE
OG0001017	-19.4909	44.9818	-17.0394	46.0788	-1.09702	FALSE
OG0001018	-15.432	36.8639	-13.5484	39.0967	-2.23278	FALSE
OG0001019	-19.2607	44.5214	-17.8061	47.6122	-3.09072	FALSE
OG0001020	-9.59759	25.1952	-9.2837	30.5674	-5.37221	FALSE
OG0001021	-19.0916	44.1833	-17.0997	46.1993	-2.01605	FALSE
OG0001022	-13.0535	32.1071	-11.67	35.3401	-3.23304	FALSE
OG0001023	-14.0698	34.1396	-13.716	39.4321	-5.29245	FALSE
OG0001024	-7.95923	21.9185	-7.8445	27.689	-5.77056	FALSE
OG0001025	-11.1892	28.3783	-10.9168	33.8335	-5.45517	FALSE
OG0001026	-11.8958	29.7917	-11.1121	34.2241	-4.43244	FALSE
OG0001027	-13.9374	33.8747	-14.5399	41.0797	-7.20498	FALSE
OG0001029	-19.816	45.6321	-19.9696	51.9392	-6.30714	FALSE
OG0001030	-15.8604	37.7209	-17.6815	47.363	-9.64218	FALSE
OG0001031	-16.1545	38.3091	-14.1432	40.2863	-1.97726	FALSE
OG0001032	-16.8569	39.7138	-17.4859	46.9718	-7.25804	FALSE
OG0001033	-14.1418	34.2835	-12.8197	37.6393	-3.35582	FALSE
OG0001034	-18.8518	43.7036	-17.2492	46.4985	-2.79482	FALSE
OG0001035	-9.17374	24.3475	-7.20353	26.4071	-2.05957	FALSE
OG0001036	-11.2797	28.5594	-11.303	34.606	-6.04667	FALSE
OG0001037	-12.8667	31.7334	-11.9504	35.9007	-4.16731	FALSE
OG0001038	-15.7132	37.4264	-16.6684	45.3367	-7.91032	FALSE
OG0001039	-14.0243	34.0486	-14.1059	40.2119	-6.16328	FALSE
OG0001040	-14.5598	35.1196	-13.9837	39.9673	-4.8477	FALSE
OG0001041	-16.9467	39.8934	-16.3301	44.6602	-4.76682	FALSE
OG0001042	-16.5766	39.1532	-15.3549	42.7098	-3.55658	FALSE
OG0001043	-15.092	36.1839	-11.6422	35.2843	0.899611	FALSE
OG0001044	-18.2402	42.4803	-18.5345	49.069	-6.58864	FALSE
OG0001045	-9.98144	25.9629	-10.0603	32.1205	-6.15764	FALSE
OG0001046	-14.9995	35.999	-18.0049	48.0097	-12.0107	FALSE
OG0001048	-18.7092	43.4183	-15.5916	43.1831	0.235207	FALSE
OG0001049	-13.6759	33.3518	-10.5161	33.0321	0.319664	FALSE
OG0001050	-15.1	36.2	-12.5325	37.065	-0.864959	FALSE
OG0001051	-7.21837	20.4367	-6.73905	25.4781	-5.04138	FALSE
OG0001052	-13.7402	33.4804	-10.3393	32.6786	0.801775	FALSE
OG0001053	-11.4229	28.8457	-10.5977	33.1955	-4.34979	FALSE
OG0001054	-16.1184	38.2368	-12.5943	37.1887	1.04815	FALSE
OG0001055	-20.2833	46.5666	-20.0701	52.1402	-5.57351	FALSE
OG0001056	-15.2127	36.4255	-14.9144	41.8289	-5.40337	FALSE
OG0001058	-16.2952	38.5904	-14.6672	41.3344	-2.74393	FALSE
OG0001059	-7.99005	21.9801	-6.70633	25.4127	-3.43256	FALSE
OG0001060	-8.484	22.968	-8.19477	28.3895	-5.42154	FALSE
OG0001061	-14.9727	35.9454	-14.8277	41.6553	-5.70988	FALSE
OG0001062	-19.2134	44.4269	-16.2955	44.591	-0.164066	FALSE
OG0001063	-11.5746	29.1492	-11.0163	34.0326	-4.88344	FALSE
OG0001064	-10.1179	26.2358	-7.79805	27.5961	-1.36026	FALSE
OG0001065	-17.5498	41.0995	-17.049	46.098	-4.99845	FALSE
OG0001066	-15.816	37.632	-15.3956	42.7911	-5.15913	FALSE
OG0001067	-18.9416	43.8832	-17.9743	47.9486	-4.06537	FALSE
OG0001068	-12.0064	30.0128	-12.2665	36.533	-6.52018	FALSE
OG0001069	-14.276	34.552	-11.5159	35.0318	-0.479847	FALSE
OG0001070	-19.3525	44.7051	-17.8763	47.7527	-3.04762	FALSE
OG0001071	-14.2375	34.475	-14.2408	40.4817	-6.0067	FALSE
OG0001072	-9.72803	25.4561	-8.05152	28.103	-2.64696	FALSE
OG0001073	-19.5526	45.1052	-16.832	45.664	-0.558816	FALSE
OG0001074	-7.02084	20.0417	-6.86843	25.7369	-5.69518	FALSE
OG0001076	-14.0035	34.007	-14.0304	40.0607	-6.05371	FALSE
OG0001077	-14.5591	35.1182	-13.5299	39.0597	-3.94154	FALSE
OG0001078	-14.7086	35.4173	-16.6038	45.2077	-9.79042	FALSE
OG0001079	-16.9388	39.8776	-14.9384	41.8768	-1.99917	FALSE
OG0001080	-19.523	45.046	-17.558	47.1159	-2.06996	FALSE
OG0001081	-7.96384	21.9277	-7.68943	27.3789	-5.45119	FALSE
OG0001082	-14.6722	35.3444	-14.6916	41.3832	-6.03884	FALSE
OG0001083	-12.3644	30.7287	-12.4736	36.9472	-6.21849	FALSE
OG0001084	-10.9372	27.8743	-10.7539	33.5077	-5.6334	FALSE
OG0001085	-7.24005	20.4801	-6.76436	25.5287	-5.04863	FALSE
OG0001086	-6.57628	19.1526	-5.42705	22.8541	-3.70152	FALSE
OG0001087	-9.81589	25.6318	-10.094	32.188	-6.55621	FALSE
OG0001089	-12.4988	30.9976	-10.9604	33.9207	-2.92307	FALSE
OG0001090	-17.7189	41.4377	-15.2147	42.4294	-0.991661	FALSE
OG0001091	-14.3643	34.7287	-13.0149	38.0297	-3.30109	FALSE
OG0001092	-21.9893	49.9787	-18.7957	49.5913	0.387344	FALSE
OG0001093	-8.02094	22.0419	-8.03184	28.0637	-6.0218	FALSE
OG0001094	-14.6154	35.2308	-16.2324	44.4648	-9.23402	FALSE
OG0001095	-15.6849	37.3698	-14.2771	40.5542	-3.1844	FALSE
OG0001096	-16.4736	38.9472	-16.2439	44.4878	-5.54053	FALSE
OG0001097	-5.32008	16.6402	-5.69645	23.3929	-6.75275	FALSE
OG0001098	-18.2233	42.4466	-15.557	43.114	-0.667457	FALSE
OG0001099	-12.9741	31.9481	-13.5949	39.1899	-7.24178	FALSE
OG0001100	-19.0726	44.1451	-16.3409	44.6818	-0.536718	FALSE
OG0001101	-10.9024	27.8049	-9.67734	31.3547	-3.54979	FALSE
OG0001103	-5.14506	16.2901	-5.38647	22.7729	-6.48281	FALSE
OG0001104	-19.4651	44.9303	-17.2858	46.5717	-1.64144	FALSE
OG0001105	-6.30726	18.6145	-6.11468	24.2294	-5.61485	FALSE
OG0001106	-9.82172	25.6434	-9.83535	31.6707	-6.02727	FALSE
OG0001107	-13.6759	33.3519	-13.539	39.078	-5.72616	FALSE
OG0001108	-20.4184	46.8368	-20.3895	52.7789	-5.9421	FALSE
OG0001109	-17.4845	40.969	-17.1961	46.3922	-5.4232	FALSE
OG0001110	-12.6079	31.2157	-9.89471	31.7894	-0.573714	FALSE
OG0001111	-13.5937	33.1874	-9.895	31.79	1.39746	FALSE
OG0001112	-14.0662	34.1325	-11.3057	34.6114	-0.478882	FALSE
OG0001113	-13.685	33.37	-18.2335	48.4671	-15.0971	FALSE
OG0001114	-19.0229	44.0458	-15.0384	42.0768	1.96897	FALSE
OG0001115	-18.3965	42.7929	-14.6765	41.3529	1.44001	FALSE
OG0001116	-7.27763	20.5553	-6.64775	25.2955	-4.74023	FALSE
OG0001117	-13.9699	33.9397	-13.4949	38.9898	-5.05008	FALSE
OG0001118	-16.5289	39.0578	-14.5567	41.1134	-2.0556	FALSE
OG0001120	-19.6071	45.2142	-16.5298	45.0595	0.154677	FALSE
OG0001121	-13.3272	32.6545	-12.5948	37.1896	-4.5351	FALSE
OG0001122	-9.22692	24.4538	-7.80258	27.6052	-3.15133	FALSE
OG0001123	-9.31294	24.6259	-9.38616	30.7723	-6.14643	FALSE
OG0001124	-14.3853	34.7706	-14.8418	41.6837	-6.91307	FALSE
OG0001125	-18.8551	43.7103	-18.961	49.922	-6.21168	FALSE
OG0001126	-13.1761	32.3522	-11.3327	34.6653	-2.31313	FALSE
OG0001127	-15.6231	37.2462	-12.1017	36.2034	1.04278	FALSE
OG0001128	-4.83045	15.6609	-4.35168	20.7034	-5.04247	FALSE
OG0001129	-16.2798	38.5597	-16.3445	44.689	-6.12937	FALSE
OG0001131	-11.7385	29.4771	-10.8751	33.7501	-4.27303	FALSE
OG0001132	-8.32757	22.6551	-7.62275	27.2455	-4.59038	FALSE
OG0001133	-20.073	46.1461	-17.1983	46.3966	-0.250551	FALSE
OG0001134	-12.4166	30.8332	-12.0197	36.0393	-5.20616	FALSE
OG0001135	-14.5342	35.0685	-13.9366	39.8732	-4.80468	FALSE
OG0001136	-15.7518	37.5037	-14.977	41.9539	-4.45022	FALSE
OG0001137	-9.76321	25.5264	-9.53424	31.0685	-5.54205	FALSE
OG0001138	-17.0723	40.1445	-16.8512	45.7024	-5.55783	FALSE
OG0001139	-4.81921	15.6384	-4.89674	21.7935	-6.15506	FALSE
OG0001140	-17.6648	41.3296	-16.9906	45.9811	-4.65151	FALSE
OG0001141	-9.93668	25.8734	-9.73524	31.4705	-5.59711	FALSE
OG0001142	-16.3505	38.7011	-14.0011	40.0021	-1.30106	FALSE
OG0001143	-15.4555	36.911	-17.4093	46.8186	-9.90762	FALSE
OG0001144	-13.8929	33.7857	-13.877	39.754	-5.96827	FALSE
OG0001145	-12.9108	31.8216	-10.5536	33.1073	-1.28565	FALSE
OG0001147	-7.53999	21.08	-6.74422	25.4884	-4.40846	FALSE
OG0001148	-18.9042	43.8084	-17.6065	47.213	-3.40459	FALSE
OG0001149	-8.47026	22.9405	-8.96383	29.9277	-6.98714	FALSE
OG0001150	-17.1844	40.3688	-15.7993	43.5987	-3.22987	FALSE
OG0001151	-10.3962	26.7925	-9.87007	31.7401	-4.94767	FALSE
OG0001152	-15.1429	36.2859	-13.28	38.56	-2.27413	FALSE
OG0001153	-7.57213	21.1443	-6.60208	25.2042	-4.05989	FALSE
OG0001154	-14.1507	34.3013	-12.1145	36.229	-1.92766	FALSE
OG0001155	-17.5543	41.1086	-13.8676	39.7351	1.37344	FALSE
OG0001156	-8.11501	22.23	-7.0835	26.167	-3.93698	FALSE
OG0001157	-18.1098	42.2197	-15.772	43.544	-1.3243	FALSE
OG0001158	-12.303	30.606	-12.6178	37.2356	-6.62962	FALSE
OG0001159	-17.5571	41.1142	-15.5217	43.0435	-1.92927	FALSE
OG0001160	-17.1138	40.2276	-14.1823	40.3646	-0.136971	FALSE
OG0001161	-13.412	32.8241	-13.439	38.878	-6.05396	FALSE
OG0001162	-12.1583	30.3166	-10.5791	33.1581	-2.84153	FALSE
OG0001163	-13.8263	33.6527	-13.3454	38.6907	-5.03807	FALSE
OG0001164	-17.43	40.8599	-15.3492	42.6984	-1.83848	FALSE
OG0001165	-17.3592	40.7184	-16.4338	44.8676	-4.14921	FALSE
OG0001166	-9.43351	24.867	-9.13847	30.2769	-5.40991	FALSE
OG0001167	-12.7378	31.4757	-12.0795	36.159	-4.68334	FALSE
OG0001168	-15.4299	36.8597	-14.9934	41.9868	-5.12704	FALSE
OG0001169	-4.9742	15.9484	-4.85072	21.7014	-5.75305	FALSE
OG0001170	-12.7972	31.5943	-13.128	38.256	-6.66164	FALSE
OG0001171	-14.4703	34.9406	-16.9116	45.8232	-10.8826	FALSE
OG0001172	-18.367	42.7339	-16.2146	44.4292	-1.69527	FALSE
OG0001173	-13.6828	33.3656	-13.7299	39.4599	-6.0943	FALSE
OG0001174	-14.2887	34.5774	-13.9201	39.8402	-5.26281	FALSE
OG0001175	-15.429	36.8581	-17.6377	47.2755	-10.4174	FALSE
OG0001177	-14.1479	34.2959	-15.2143	42.4286	-8.13271	FALSE
OG0001178	-15.1745	36.349	-14.2409	40.4818	-4.13279	FALSE
OG0001179	-12.1857	30.3713	-12.0771	36.1543	-5.78291	FALSE
OG0001180	-11.5895	29.179	-10.6778	33.3556	-4.17657	FALSE
OG0001181	-15.4647	36.9293	-14.586	41.1721	-4.24275	FALSE
OG0001182	-16.464	38.928	-12.5946	37.1893	1.73876	FALSE
OG0001183	-12.8566	31.7133	-12.5248	37.0497	-5.33643	FALSE
OG0001184	-14.4294	34.8587	-14.3412	40.6824	-5.82366	FALSE
OG0001185	-18.9566	43.9132	-18.0643	48.1286	-4.21542	FALSE
OG0001186	-15.8785	37.757	-15.5608	43.1216	-5.36466	FALSE
OG0001187	-17.3193	40.6385	-17.0146	46.0293	-5.39075	FALSE
OG0001188	-14.5109	35.0219	-13.4873	38.9746	-3.9527	FALSE
OG0001189	-14.1195	34.239	-12.6448	37.2896	-3.05062	FALSE
OG0001190	-13.921	33.842	-13.1995	38.3989	-4.55696	FALSE
OG0001192	-13.9733	33.9465	-12.1886	36.3771	-2.4306	FALSE
OG0001193	-15.7065	37.4131	-15.467	42.934	-5.52097	FALSE
OG0001194	-7.97138	21.9428	-8.15699	28.314	-6.37121	FALSE
OG0001195	-19.3177	44.6353	-17.0312	46.0623	-1.427	FALSE
OG0001196	-12.7892	31.5785	-12.8753	37.7506	-6.17215	FALSE
OG0001197	-8.68991	23.3798	-8.72464	29.4493	-6.06948	FALSE
OG0001199	-7.81251	21.625	-7.00338	26.0068	-4.38175	FALSE
OG0001200	-13.7736	33.5471	-15.0522	42.1045	-8.55737	FALSE
OG0001201	-7.94901	21.898	-7.56183	27.1237	-5.22563	FALSE
OG0001202	-15.0357	36.0713	-14.5978	41.1956	-5.1243	FALSE
OG0001203	-10.8376	27.6753	-13.6368	39.2736	-11.5983	FALSE
OG0001204	-8.3637	22.7274	-7.71329	27.4266	-4.69919	FALSE
OG0001206	-9.3647	24.7294	-8.43044	28.8609	-4.13149	FALSE
OG0001207	-15.4685	36.9371	-14.9553	41.9105	-4.97341	FALSE
OG0001208	-12.5767	31.1535	-10.2992	32.5984	-1.44489	FALSE
OG0001209	-15.1573	36.3145	-14.7336	41.4671	-5.1526	FALSE
OG0001210	-10.9002	27.8004	-9.98016	31.9603	-4.15996	FALSE
OG0001211	-8.05786	22.1157	-8.40313	28.8063	-6.69055	FALSE
OG0001212	-18.9113	43.8225	-16.6172	45.2344	-1.41186	FALSE
OG0001213	-10.7371	27.4742	-8.60568	29.2114	-1.73721	FALSE
OG0001214	-17.4762	40.9524	-15.7854	43.5709	-2.6185	FALSE
OG0001215	-16.3882	38.7763	-14.0468	40.0935	-1.31719	FALSE
OG0001216	-14.4365	34.873	-13.9335	39.867	-4.99398	FALSE
OG0001217	-11.2499	28.4998	-11.1993	34.3985	-5.89873	FALSE
OG0001218	-6.62727	19.2545	-6.39053	24.7811	-5.52652	FALSE
OG0001219	-19.1837	44.3674	-15.3222	42.6444	1.72301	FALSE
OG0001220	-8.92712	23.8542	-8.45096	28.9019	-5.04769	FALSE
OG0001221	-12.5094	31.0188	-12.1724	36.3448	-5.32592	FALSE
OG0001222	-13.605	33.2101	-14.5569	41.1137	-7.90367	FALSE
OG0001223	-14.6095	35.2191	-14.5701	41.1403	-5.92121	FALSE
OG0001224	-14.9198	35.8396	-14.2198	40.4396	-4.60003	FALSE
OG0001225	-20.2221	46.4442	-20.3941	52.7882	-6.34398	FALSE
OG0001226	-14.3603	34.7206	-13.0304	38.0608	-3.3402	FALSE
OG0001228	-13.1556	32.3111	-11.1078	34.2156	-1.90449	FALSE
OG0001229	-10.6559	27.3118	-6.77138	25.5428	1.76905	FALSE
OG0001230	-16.4428	38.8855	-15.2187	42.4374	-3.55193	FALSE
OG0001231	-17.1962	40.3925	-14.6982	41.3964	-1.00397	FALSE
OG0001232	-4.81921	15.6384	-4.89674	21.7935	-6.15506	FALSE
OG0001233	-13.0842	32.1684	-12.4295	36.8589	-4.69056	FALSE
OG0001234	-15.3737	36.7474	-14.399	40.798	-4.0506	FALSE
OG0001235	-10.9156	27.8312	-10.4385	32.8769	-5.04574	FALSE
OG0001237	-11.7801	29.5601	-11.4389	34.8778	-5.31769	FALSE
OG0001238	-16.3463	38.6927	-16.3989	44.7978	-6.10516	FALSE
OG0001239	-11.5121	29.0242	-8.43939	28.8788	0.145406	FALSE
OG0001240	-17.6787	41.3574	-15.5928	43.1857	-1.82831	FALSE
OG0001241	-17.9946	41.9891	-18.1881	48.3762	-6.38712	FALSE
OG0001242	-10.746	27.492	-8.71236	29.4247	-1.93271	FALSE
OG0001243	-11.2796	28.5591	-9.87511	31.7502	-3.19112	FALSE
OG0001244	-7.56571	21.1314	-6.16669	24.3334	-3.20197	FALSE
OG0001245	-9.40841	24.8168	-9.96393	31.9279	-7.11103	FALSE
OG0001246	-12.1704	30.3408	-11.6937	35.3874	-5.0466	FALSE
OG0001247	-14.8297	35.6594	-14.1903	40.3806	-4.72115	FALSE
OG0001248	-15.7111	37.4222	-17.2928	46.5856	-9.16345	FALSE
OG0001249	-14.5767	35.1534	-13.9944	39.9889	-4.83551	FALSE
OG0001250	-12.5953	31.1907	-11.9967	35.9934	-4.80273	FALSE
OG0001251	-5.14506	16.2901	-5.38647	22.7729	-6.48281	FALSE
OG0001253	-15.0988	36.1975	-15.1569	42.3137	-6.11619	FALSE
OG0001254	-14.1948	34.3896	-14.5255	41.0511	-6.66152	FALSE
OG0001255	-18.6221	43.2443	-16.3091	44.6182	-1.3739	FALSE
OG0001256	-10.9384	27.8767	-10.8074	33.6148	-5.73813	FALSE
OG0001257	-12.7725	31.545	-12.4521	36.9043	-5.35926	FALSE
OG0001258	-7.94901	21.898	-7.56183	27.1237	-5.22563	FALSE
OG0001259	-13.2447	32.4894	-12.9372	37.8744	-5.38504	FALSE
OG0001260	-18.6235	43.247	-18.542	49.0839	-5.83696	FALSE
OG0001261	-18.2974	42.5948	-17.9101	47.8201	-5.22532	FALSE
OG0001262	-16.3073	38.6145	-16.7279	45.4559	-6.84136	FALSE
OG0001263	-12.4422	30.8845	-12.7288	37.4577	-6.57321	FALSE
OG0001264	-17.7076	41.4152	-17.0749	46.1498	-4.7346	FALSE
OG0001265	-17.6938	41.3876	-16.7799	45.5598	-4.17219	FALSE
OG0001266	-16.5961	39.1922	-16.6691	45.3382	-6.14599	FALSE
OG0001267	-11.4358	28.8717	-8.55879	29.1176	-0.245901	FALSE
OG0001268	-10.5083	27.0166	-8.8413	29.6826	-2.66602	FALSE
OG0001269	-17.6072	41.2144	-17.7089	47.4177	-6.20334	FALSE
OG0001270	-15.8927	37.7853	-15.0026	42.0051	-4.21981	FALSE
OG0001271	-14.3866	34.7732	-17.6494	47.2989	-12.5257	FALSE
OG0001272	-13.7075	33.415	-12.4245	36.8491	-3.43404	FALSE
OG0001273	-6.53159	19.0632	-6.30919	24.6184	-5.55519	FALSE
OG0001275	-11.9495	29.899	-11.0844	34.1689	-4.26989	FALSE
OG0001276	-13.8458	33.6916	-14.285	40.57	-6.8784	FALSE
OG0001277	-15.1819	36.3637	-13.1244	38.2488	-1.88506	FALSE
OG0001278	-12.1405	30.281	-13.2253	38.4507	-8.16969	FALSE
OG0001280	-20.4765	46.953	-20.5362	53.0723	-6.11933	FALSE
OG0001281	-3.02751	12.055	-2.83432	17.6686	-5.61363	FALSE
OG0001282	-14.054	34.108	-13.9369	39.8738	-5.7658	FALSE
OG0001283	-10.3465	26.693	-9.10832	30.2166	-3.52362	FALSE
OG0001284	-11.5051	29.0102	-10.2517	32.5034	-3.49317	FALSE
OG0001285	-4.81921	15.6384	-4.89674	21.7935	-6.15506	FALSE
OG0001286	-11.7853	29.5706	-11.4988	34.9975	-5.42694	FALSE
OG0001287	-4.81921	15.6384	-4.89674	21.7935	-6.15506	FALSE
OG0001288	-15.8822	37.7644	-15.3427	42.6855	-4.92106	FALSE
OG0001289	-17.5142	41.0284	-13.9355	39.8711	1.15736	FALSE
OG0001290	-7.52905	21.0581	-6.55864	25.1173	-4.05919	FALSE
OG0001292	-18.2717	42.5435	-14.46	40.9199	1.62358	FALSE
OG0001293	-13.2601	32.5201	-13.2111	38.4221	-5.90201	FALSE
OG0001294	-9.07733	24.1547	-7.91745	27.8349	-3.68024	FALSE
OG0001295	-7.56571	21.1314	-6.16669	24.3334	-3.20197	FALSE
OG0001296	-12.9666	31.9332	-12.4434	36.8868	-4.95361	FALSE
OG0001297	-17.524	41.0479	-16.6512	45.3024	-4.25449	FALSE
OG0001299	-7.55208	21.1042	-4.90164	21.8033	-0.699131	FALSE
OG0001300	-6.58014	19.1603	-6.34634	24.6927	-5.53239	FALSE
OG0001301	-12.9447	31.8894	-13.2949	38.5898	-6.70039	FALSE
OG0001302	-9.41232	24.8246	-9.44026	30.8805	-6.05586	FALSE
OG0001303	-15.2022	36.4044	-14.3404	40.6807	-4.27638	FALSE
OG0001304	-6.25005	18.5001	-5.75312	23.5062	-5.00614	FALSE
OG0001305	-16.2455	38.491	-15.1224	42.2448	-3.75379	FALSE
OG0001306	-14.0938	34.1877	-13.8816	39.7632	-5.5755	FALSE
OG0001307	-5.41635	16.8327	-5.42832	22.8566	-6.02395	FALSE
OG0001308	-17.6328	41.2656	-20.5738	53.1477	-11.882	FALSE
OG0001310	-19.0721	44.1441	-19.0224	50.0447	-5.90059	FALSE
OG0001311	-14.478	34.956	-14.1208	40.2416	-5.28561	FALSE
OG0001313	-10.9251	27.8503	-10.2143	32.4285	-4.57828	FALSE
OG0001314	-8.85371	23.7074	-8.02864	28.0573	-4.34986	FALSE
OG0001315	-13.0605	32.121	-11.4223	34.8447	-2.72363	FALSE
OG0001316	-10.8632	27.7263	-9.95344	31.9069	-4.18056	FALSE
OG0001317	-9.57898	25.158	-9.08883	30.1777	-5.01969	FALSE
OG0001318	-8.15038	22.3008	-8.10528	28.2106	-5.9098	FALSE
OG0001319	-12.0802	30.1604	-12.2263	36.4527	-6.29222	FALSE
OG0001320	-17.9577	41.9154	-19.1489	50.2979	-8.38246	FALSE
OG0001321	-7.93266	21.8653	-7.36963	26.7393	-4.87394	FALSE
OG0001322	-11.4019	28.8039	-11.2575	34.515	-5.71114	FALSE
OG0001323	-17.5582	41.1165	-14.638	41.276	-0.15949	FALSE
OG0001324	-18.2357	42.4714	-18.8669	49.7338	-7.2624	FALSE
OG0001325	-13.9935	33.987	-13.4906	38.9811	-4.99411	FALSE
OG0001326	-8.24807	22.4961	-7.4874	26.9748	-4.47866	FALSE
OG0001327	-12.8086	31.6172	-17.0333	46.0666	-14.4493	FALSE
OG0001328	-11.66	29.3199	-11.1756	34.3513	-5.03135	FALSE
OG0001329	-14.9826	35.9651	-13.18	38.36	-2.39483	FALSE
OG0001330	-14.1237	34.2474	-12.1081	36.2161	-1.9687	FALSE
OG0001331	-8.59641	23.1928	-7.5866	27.1732	-3.98037	FALSE
OG0001332	-10.2525	26.505	-9.05914	30.1183	-3.61323	FALSE
OG0001333	-8.3637	22.7274	-8.58868	29.1774	-6.44995	FALSE
OG0001334	-13.0305	32.0611	-11.4996	34.9991	-2.93803	FALSE
OG0001335	-11.6739	29.3479	-10.6633	33.3266	-3.97868	FALSE
OG0001336	-11.4742	28.9485	-11.0919	34.1838	-5.23532	FALSE
OG0001337	-13.4824	32.9648	-14.175	40.35	-7.38517	FALSE
OG0001338	-11.8306	29.6613	-9.62657	31.2531	-1.59187	FALSE
OG0001339	-6.85016	19.7003	-6.05409	24.1082	-4.40785	FALSE
OG0001340	-13.2189	32.4378	-12.5658	37.1316	-4.69378	FALSE
OG0001341	-19.0601	44.1201	-16.7058	45.4116	-1.2915	FALSE
OG0001342	-7.57452	21.149	-6.46552	24.931	-3.782	FALSE
OG0001344	-11.4258	28.8517	-11.2264	34.4527	-5.60106	FALSE
OG0001345	-16.1946	38.3893	-13.3591	38.7182	-0.328887	FALSE
OG0001346	-10.7179	27.4359	-10.0492	32.0983	-4.66246	FALSE
OG0001347	-12.3644	30.7287	-14.5148	41.0297	-10.301	FALSE
OG0001348	-13.702	33.404	-13.486	38.9719	-5.56795	FALSE
OG0001349	-14.733	35.466	-13.9211	39.8422	-4.37615	FALSE
OG0001350	-14.5253	35.0506	-12.4957	36.9913	-1.94075	FALSE
OG0001351	-11.2097	28.4194	-9.70496	31.4099	-2.99053	FALSE
OG0001352	-17.7418	41.4836	-14.5827	41.1655	0.318155	FALSE
OG0001353	-16.2781	38.5563	-14.313	40.6259	-2.06964	FALSE
OG0001354	-6.57628	19.1526	-5.42705	22.8541	-3.70152	FALSE
OG0001355	-8.58227	23.1645	-8.50638	29.0128	-5.84821	FALSE
OG0001356	-14.6263	35.2525	-16.2481	44.4963	-9.24377	FALSE
OG0001357	-11.4793	28.9587	-9.86492	31.7298	-2.77115	FALSE
OG0001358	-9.56976	25.1395	-9.19873	30.3975	-5.25794	FALSE
OG0001359	-11.0263	28.0526	-12.7809	37.5619	-9.50926	FALSE
OG0001360	-12.2447	30.4894	-12.167	36.3341	-5.84465	FALSE
OG0001361	-8.74097	23.4819	-7.81584	27.6317	-4.14975	FALSE
OG0001362	-16.4959	38.9918	-14.6422	41.2845	-2.29266	FALSE
OG0001363	-18.0391	42.0782	-16.8515	45.7029	-3.62467	FALSE
OG0001364	-13.3587	32.7174	-13.5237	39.0474	-6.32997	FALSE
OG0001365	-14.4628	34.9257	-13.7361	39.4721	-4.54643	FALSE
OG0001366	-13.2236	32.4472	-11.9386	35.8773	-3.43001	FALSE
OG0001367	-11.1674	28.3347	-10.9176	33.8353	-5.50055	FALSE
OG0001368	-8.59045	23.1809	-7.55723	27.1145	-3.93356	FALSE
OG0001369	-12.6287	31.2573	-12.5166	37.0333	-5.77597	FALSE
OG0001370	-18.2821	42.5643	-15.5855	43.171	-0.60679	FALSE
OG0001371	-17.066	40.1321	-16.3394	44.6789	-4.54678	FALSE
OG0001372	-11.8083	29.6166	-11.2702	34.5405	-4.92384	FALSE
OG0001373	-14.1064	34.2128	-11.5422	35.0844	-0.871642	FALSE
OG0001374	-10.9321	27.8643	-10.8542	33.7084	-5.84415	FALSE
OG0001375	-8.57396	23.1479	-4.95939	21.9188	1.22913	FALSE
OG0001376	-17.6546	41.3091	-16.5311	45.0622	-3.75303	FALSE
OG0001377	-8.9195	23.839	-8.77422	29.5484	-5.70943	FALSE
OG0001380	-12.8446	31.6892	-13.4454	38.8907	-7.20156	FALSE
OG0001381	-13.1793	32.3587	-12.9639	37.9278	-5.5691	FALSE
OG0001382	-13.3124	32.6247	-15.568	43.136	-10.5113	FALSE
OG0001383	-10.9359	27.8718	-9.85226	31.7045	-3.83277	FALSE
OG0001384	-4.9742	15.9484	-4.80304	21.6061	-5.65768	FALSE
OG0001385	-20.1999	46.3997	-18.0925	48.1851	-1.78537	FALSE
OG0001386	-5.23065	16.4613	-5.14171	22.2834	-5.82213	FALSE
OG0001387	-14.4277	34.8553	-12.4601	36.9203	-2.06493	FALSE
OG0001388	-5.26544	16.5309	-5.17958	22.3592	-5.82829	FALSE
OG0001389	-16.6557	39.3113	-16.2107	44.4214	-5.11006	FALSE
OG0001390	-14.9175	35.835	-14.6448	41.2896	-5.45461	FALSE
OG0001391	-16.7834	39.5667	-17.3534	46.7067	-7.14003	FALSE
OG0001392	-16.0245	38.049	-12.691	37.382	0.666988	FALSE
OG0001393	-12.1401	30.2801	-11.8803	35.7606	-5.48043	FALSE
OG0001394	-13.566	33.132	-13.1158	38.2315	-5.09952	FALSE
OG0001395	-3.86268	13.7254	-3.44625	18.8925	-5.16713	FALSE
OG0001396	-20.3225	46.645	-17.3874	46.7747	-0.129693	FALSE
OG0001397	-14.6712	35.3424	-14.0472	40.0944	-4.75199	FALSE
OG0001398	-12.2657	30.5315	-11.5438	35.0876	-4.55617	FALSE
OG0001399	-15.2611	36.5221	-14.2806	40.5612	-4.03912	FALSE
OG0001400	-7.10275	20.2055	-6.25589	24.5118	-4.30628	FALSE
OG0001401	-11.8968	29.7936	-11.5392	35.0783	-5.28474	FALSE
OG0001402	-12.5652	31.1304	-12.6699	37.3398	-6.20942	FALSE
OG0001403	-12.5164	31.0328	-10.5975	33.195	-2.16215	FALSE
OG0001404	-18.5143	43.0286	-15.1123	42.2245	0.804107	FALSE
OG0001405	-13.3198	32.6396	-12.2372	36.4743	-3.83476	FALSE
OG0001406	-12.6994	31.3987	-13.0974	38.1949	-6.79616	FALSE
OG0001407	-15.9301	37.8602	-13.5468	39.0935	-1.23328	FALSE
OG0001408	-16.2775	38.555	-15.2674	42.5348	-3.97979	FALSE
OG0001409	-17.5431	41.0861	-17.4912	46.9823	-5.89617	FALSE
OG0001410	-10.2927	26.5854	-8.49674	28.9935	-2.40811	FALSE
OG0001411	-16.8842	39.7685	-17.1338	46.2677	-6.49919	FALSE
OG0001412	-4.83045	15.6609	-4.35168	20.7034	-5.04247	FALSE
OG0001413	-13.5721	33.1442	-12.9783	37.9567	-4.81244	FALSE
OG0001414	-3.02751	12.055	-2.83432	17.6686	-5.61363	FALSE
OG0001415	-12.5476	31.0952	-12.1312	36.2625	-5.16734	FALSE
OG0001416	-11.8438	29.6876	-11.1288	34.2575	-4.56992	FALSE
OG0001417	-15.8927	37.7853	-15.0026	42.0051	-4.21981	FALSE
OG0001419	-11.2815	28.5629	-9.80874	31.6175	-3.05458	FALSE
OG0001420	-10.9931	27.9863	-10.0095	32.019	-4.03269	FALSE
OG0001421	-4.9742	15.9484	-4.85072	21.7014	-5.75305	FALSE
OG0001422	-8.04446	22.0889	-8.09122	28.1824	-6.09351	FALSE
OG0001423	-13.7428	33.4855	-13.6717	39.3433	-5.8578	FALSE
OG0001424	-15.6916	37.3831	-14.8487	41.6974	-4.31433	FALSE
OG0001425	-14.4363	34.8727	-17.8035	47.6071	-12.7344	FALSE
OG0001426	-13.0976	32.1952	-12.4084	36.8168	-4.62162	FALSE
OG0001427	-14.1732	34.3463	-11.8827	35.7654	-1.41904	FALSE
OG0001428	-14.7146	35.4292	-11.9572	35.9145	-0.485316	FALSE
OG0001429	-15.1699	36.3398	-13.1883	38.3766	-2.03686	FALSE
OG0001430	-16.2532	38.5065	-14.6442	41.2884	-2.78194	FALSE
OG0001431	-9.28228	24.5646	-8.7346	29.4692	-4.90463	FALSE
OG0001432	-15.6178	37.2355	-13.0505	38.1009	-0.865389	FALSE
OG0001433	-14.6406	35.2813	-11.6338	35.2676	0.0136842	FALSE
OG0001434	-12.1918	30.3837	-11.9382	35.8764	-5.49278	FALSE
OG0001436	-8.69351	23.387	-8.46202	28.924	-5.53702	FALSE
OG0001437	-13.8657	33.7314	-13.7415	39.4831	-5.75164	FALSE
OG0001439	-7.52905	21.0581	-6.55864	25.1173	-4.05919	FALSE
OG0001440	-14.9507	35.9014	-15.7159	43.4318	-7.53041	FALSE
OG0001441	-3.02751	12.055	-2.83432	17.6686	-5.61363	FALSE
OG0001442	-15.0193	36.0387	-14.7299	41.4598	-5.42113	FALSE
OG0001443	-15.4579	36.9158	-15.1329	42.2658	-5.34993	FALSE
OG0001444	-10.567	27.1339	-10.5136	33.0273	-5.89334	FALSE
OG0001445	-12.394	30.7879	-9.92669	31.8534	-1.06542	FALSE
OG0001446	-12.4888	30.9776	-12.9894	37.9789	-7.00125	FALSE
OG0001447	-15.3534	36.7067	-16.5129	45.0257	-8.31897	FALSE
OG0001448	-14.9834	35.9669	-13.5619	39.1238	-3.15689	FALSE
OG0001449	-10.895	27.79	-9.02988	30.0598	-2.26975	FALSE
OG0001450	-13.3584	32.7168	-12.3666	36.7332	-4.01649	FALSE
OG0001451	-7.97138	21.9428	-8.15699	28.314	-6.37121	FALSE
OG0001452	-10.6757	27.3514	-10.2503	32.5007	-5.14926	FALSE
OG0001453	-14.7009	35.4018	-15.716	43.432	-8.03019	FALSE
OG0001454	-11.8283	29.6567	-13.4165	38.833	-9.1763	FALSE
OG0001455	-16.2348	38.4696	-16.1518	44.3037	-5.83403	FALSE
OG0001456	-15.0015	36.0031	-14.8381	41.6762	-5.67309	FALSE
OG0001457	-12.1973	30.3947	-11.5516	35.1033	-4.70862	FALSE
OG0001458	-9.93663	25.8733	-9.68591	31.3718	-5.49856	FALSE
OG0001459	-16.4058	38.8116	-14.4797	40.9594	-2.14788	FALSE
OG0001460	-13.6687	33.3373	-15.5395	43.079	-9.74168	FALSE
OG0001461	-12.9589	31.9178	-12.3403	36.6806	-4.7628	FALSE
OG0001462	-15.7709	37.5419	-16.0102	44.0204	-6.47849	FALSE
OG0001463	-17.9579	41.9158	-17.1484	46.2968	-4.381	FALSE
OG0001465	-12.7717	31.5435	-11.9226	35.8452	-4.30173	FALSE
OG0001466	-6.62727	19.2545	-6.39053	24.7811	-5.52652	FALSE
OG0001467	-13.568	33.1359	-12.2074	36.4149	-3.27897	FALSE
OG0001468	-14.9595	35.9189	-17.1917	46.3834	-10.4645	FALSE
OG0001469	-10.941	27.882	-9.22318	30.4464	-2.56434	FALSE
OG0001470	-14.6913	35.3825	-12.5523	37.1045	-1.72201	FALSE
OG0001471	-14.4959	34.9917	-13.8969	39.7939	-4.80218	FALSE
OG0001472	-4.81921	15.6384	-4.89674	21.7935	-6.15506	FALSE
OG0001473	-17.258	40.516	-15.9611	43.9221	-3.40611	FALSE
OG0001474	-7.61271	21.2254	-6.72873	25.4575	-4.23203	FALSE
OG0001475	-17.3747	40.7494	-17.3359	46.6717	-5.92228	FALSE
OG0001476	-8.24807	22.4961	-7.4874	26.9748	-4.47866	FALSE
OG0001477	-14.8825	35.7651	-14.9306	41.8612	-6.0961	FALSE
OG0001478	-11.6693	29.3386	-11.4168	34.8336	-5.495	FALSE
OG0001479	-11.3866	28.7733	-9.56456	31.1291	-2.35583	FALSE
OG0001480	-13.7024	33.4048	-12.0196	36.0393	-2.63451	FALSE
OG0001481	-12.7251	31.4501	-10.9828	33.9655	-2.51542	FALSE
OG0001482	-3.02751	12.055	-2.83432	17.6686	-5.61363	FALSE
OG0001483	-14.8352	35.6704	-12.4725	36.945	-1.27458	FALSE
OG0001484	-10.6112	27.2224	-10.722	33.444	-6.22163	FALSE
OG0001485	-14.2303	34.4605	-10.8	33.5999	0.860608	FALSE
OG0001486	-10.895	27.79	-9.02988	30.0598	-2.26975	FALSE
OG0001488	-18.012	42.024	-16.758	45.516	-3.49201	FALSE
OG0001489	-14.0941	34.1882	-13.9725	39.945	-5.75684	FALSE
OG0001490	-8.9857	23.9714	-7.22606	26.4521	-2.48073	FALSE
OG0001491	-16.476	38.9519	-14.4273	40.8545	-1.90256	FALSE
OG0001492	-14.2064	34.4128	-14.6999	41.3998	-6.98696	FALSE
OG0001493	-12.9207	31.8413	-14.4762	40.9524	-9.11112	FALSE
OG0001494	-17.9815	41.9629	-17.1013	46.2025	-4.23959	FALSE
OG0001495	-17.1339	40.2679	-14.5468	41.0936	-0.825706	FALSE
OG0001496	-18.9549	43.9099	-18.6232	49.2464	-5.33653	FALSE
OG0001497	-14.3238	34.6476	-12.811	37.622	-2.97442	FALSE
OG0001498	-16.7069	39.4138	-14.3767	40.7534	-1.33959	FALSE
OG0001499	-15.1843	36.3686	-14.3523	40.7047	-4.33606	FALSE
OG0001500	-16.645	39.29	-15.9353	43.8706	-4.58055	FALSE
OG0001501	-14.2357	34.4715	-13.3974	38.7948	-4.32329	FALSE
OG0001503	-16.6347	39.2695	-13.4802	38.9604	0.309105	FALSE
OG0001504	-11.2045	28.4091	-10.2194	32.4389	-4.02976	FALSE
OG0001505	-11.6571	29.3143	-11.97	35.9399	-6.62565	FALSE
OG0001506	-10.8265	27.6531	-10.2817	32.5633	-4.91024	FALSE
OG0001507	-6.58014	19.1603	-6.34634	24.6927	-5.53239	FALSE
OG0001509	-17.0742	40.1484	-14.9419	41.8838	-1.73538	FALSE
OG0001511	-17.6706	41.3411	-14.8858	41.7716	-0.43046	FALSE
OG0001512	-15.5915	37.1831	-14.4459	40.8918	-3.70877	FALSE
OG0001513	-12.3778	30.7555	-13.7359	39.4718	-8.71631	FALSE
OG0001514	-11.7317	29.4634	-10.4395	32.8791	-3.41571	FALSE
OG0001515	-16.9851	39.9702	-17.0509	46.1018	-6.13157	FALSE
OG0001516	-12.3666	30.7332	-12.5161	37.0322	-6.29899	FALSE
OG0001517	-16.1429	38.2859	-19.5597	51.1193	-12.8335	FALSE
OG0001518	-10.1549	26.3097	-9.89495	31.7899	-5.48018	FALSE
OG0001519	-13.7086	33.4173	-14.3978	40.7957	-7.37837	FALSE
OG0001520	-17.1419	40.2838	-13.743	39.486	0.797802	FALSE
OG0001521	-15.8702	37.7405	-15.9889	43.9777	-6.23723	FALSE
OG0001522	-11.2097	28.4194	-9.70496	31.4099	-2.99053	FALSE
OG0001523	-12.9224	31.8447	-11.8898	35.7797	-3.93495	FALSE
OG0001524	-12.0453	30.0906	-11.6112	35.2224	-5.13177	FALSE
OG0001525	-8.24807	22.4961	-7.4874	26.9748	-4.47866	FALSE
OG0001526	-13.8756	33.7512	-16.0675	44.135	-10.3838	FALSE
OG0001527	-14.3769	34.7538	-16.786	45.5721	-10.8183	FALSE
OG0001528	-16.6671	39.3342	-14.6088	41.2176	-1.88334	FALSE
OG0001529	-18.092	42.184	-14.5481	41.0963	1.08776	FALSE
OG0001530	-4.81921	15.6384	-4.89674	21.7935	-6.15506	FALSE
OG0001531	-7.36593	20.7319	-6.53013	25.0603	-4.32841	FALSE
OG0001532	-14.2876	34.5752	-12.1933	36.3866	-1.81142	FALSE
OG0001534	-5.41635	16.8327	-5.42832	22.8566	-6.02395	FALSE
OG0001535	-10.0768	26.1536	-8.82727	29.6545	-3.50092	FALSE
OG0001536	-10.3656	26.7313	-9.73135	31.4627	-4.7314	FALSE
OG0001537	-12.7609	31.5218	-12.3537	36.7074	-5.18561	FALSE
OG0001538	-18.5223	43.0447	-16.1636	44.3272	-1.28249	FALSE
OG0001539	-5.63056	17.2611	-4.6502	21.3004	-4.03929	FALSE
OG0001540	-12.5555	31.1109	-12.9066	37.8132	-6.70224	FALSE
OG0001541	-11.9495	29.899	-11.0844	34.1689	-4.26989	FALSE
OG0001542	-14.0972	34.1945	-12.7587	37.5175	-3.323	FALSE
OG0001543	-19.07	44.1399	-17.3827	46.7654	-2.62544	FALSE
OG0001545	-12.5104	31.0209	-12.7372	37.4743	-6.45346	FALSE
OG0001546	-14.7004	35.4008	-14.2471	40.4942	-5.09343	FALSE
OG0001547	-13.1702	32.3404	-12.905	37.81	-5.4696	FALSE
OG0001548	-17.0603	40.1205	-13.7403	39.4807	0.639851	FALSE
OG0001549	-12.5591	31.1183	-8.88136	29.7627	1.35554	FALSE
OG0001550	-17.1133	40.2266	-16.3878	44.7757	-4.54909	FALSE
OG0001551	-13.9432	33.8864	-13.9074	39.8149	-5.92849	FALSE
OG0001552	-12.6942	31.3883	-12.8678	37.7356	-6.34731	FALSE
OG0001553	-11.7187	29.4374	-14.2037	40.4074	-10.9701	FALSE
OG0001554	-11.2527	28.5055	-11.9612	35.9224	-7.41695	FALSE
OG0001555	-14.8761	35.7522	-15.0333	42.0666	-6.3145	FALSE
OG0001556	-18.5325	43.0649	-15.8614	43.7227	-0.657817	FALSE
OG0001557	-12.4244	30.8489	-11.9308	35.8617	-5.01283	FALSE
OG0001558	-16.9574	39.9148	-15.1991	42.3983	-2.48348	FALSE
OG0001559	-11.8813	29.7626	-12.0197	36.0394	-6.27686	FALSE
OG0001560	-10.57	27.1399	-8.88402	29.768	-2.62814	FALSE
OG0001561	-11.6395	29.279	-10.8329	33.6658	-4.38684	FALSE
OG0001562	-12.9666	31.9332	-12.4434	36.8868	-4.95361	FALSE
OG0001563	-12.3063	30.6126	-11.0557	34.1114	-3.49872	FALSE
OG0001564	-12.7975	31.5949	-14.4663	40.9326	-9.33769	FALSE
OG0001565	-15.6666	37.3332	-14.2141	40.4282	-3.095	FALSE
OG0001566	-13.3434	32.6867	-14.6019	41.2038	-8.51711	FALSE
OG0001567	-17.9563	41.9126	-20.0234	52.0468	-10.1341	FALSE
OG0001569	-15.8529	37.7057	-19.4041	50.8081	-13.1024	FALSE
OG0001571	-10.6141	27.2282	-11.2727	34.5454	-7.31714	FALSE
OG0001572	-8.27319	22.5464	-9.45057	30.9011	-8.35476	FALSE
OG0001573	-10.8056	27.6112	-10.1588	32.3177	-4.70652	FALSE
OG0001574	-4.81921	15.6384	-4.89674	21.7935	-6.15506	FALSE
OG0001575	-15.8133	37.6265	-14.3881	40.7763	-3.14978	FALSE
OG0001576	-12.5973	31.1945	-12.5632	37.1264	-5.93185	FALSE
OG0001577	-8.35152	22.703	-8.4171	28.8342	-6.13117	FALSE
OG0001578	-11.5025	29.005	-10.1021	32.2042	-3.19926	FALSE
OG0001579	-14.788	35.576	-15.0961	42.1922	-6.61626	FALSE
OG0001580	-13.5263	33.0527	-14.4239	40.8478	-7.79517	FALSE
OG0001581	-13.5939	33.1878	-11.9602	35.9203	-2.73252	FALSE
OG0001582	-13.0333	32.0665	-12.6847	37.3693	-5.3028	FALSE
OG0001583	-6.83119	19.6624	-6.53224	25.0645	-5.4021	FALSE
OG0001584	-13.6559	33.3119	-12.4367	36.8734	-3.56149	FALSE
OG0001585	-13.6541	33.3083	-12.4159	36.8318	-3.5235	FALSE
OG0001586	-19.4711	44.9421	-18.9192	49.8384	-4.89631	FALSE
OG0001587	-11.9275	29.855	-10.9245	33.8489	-3.99392	FALSE
OG0001588	-17.9396	41.8791	-16.0216	44.0431	-2.164	FALSE
OG0001589	-13.2314	32.4628	-12.99	37.98	-5.5172	FALSE
OG0001590	-13.6336	33.2671	-13.3158	38.6317	-5.36455	FALSE
OG0001591	-10.5723	27.1445	-10.7345	33.4689	-6.3244	FALSE
OG0001592	-11.7919	29.5839	-11.1666	34.3333	-4.7494	FALSE
OG0001593	-18.6182	43.2365	-18.3212	48.6423	-5.40584	FALSE
OG0001594	-16.1091	38.2183	-13.7495	39.499	-1.28076	FALSE
OG0001595	-14.2539	34.5079	-16.8797	45.7593	-11.2515	FALSE
OG0001596	-16.3816	38.7632	-12.678	37.3561	1.4071	FALSE
OG0001597	-15.2248	36.4496	-15.9501	43.9002	-7.4506	FALSE
OG0001598	-12.1408	30.2817	-9.81643	31.6329	-1.35119	FALSE
OG0001599	-3.02751	12.055	-2.83432	17.6686	-5.61363	FALSE
OG0001600	-17.9953	41.9906	-14.9004	41.8008	0.189796	FALSE
OG0001601	-4.19256	14.3851	-4.47248	20.945	-6.55984	FALSE
OG0001602	-14.362	34.7239	-15.6745	43.3491	-8.62513	FALSE
OG0001603	-11.5387	29.0773	-12.0145	36.0291	-6.95176	FALSE
OG0001604	-9.30494	24.6099	-8.18178	28.3636	-3.75367	FALSE
OG0001606	-7.97138	21.9428	-8.15699	28.314	-6.37121	FALSE
OG0001607	-9.42088	24.8418	-9.4855	30.971	-6.12925	FALSE
OG0001608	-14.6065	35.2131	-14.4137	40.8273	-5.61424	FALSE
OG0001609	-14.398	34.796	-13.1827	38.3653	-3.56928	FALSE
OG0001610	-11.0529	28.1059	-10.2633	32.5267	-4.42081	FALSE
OG0001611	-10.7885	27.577	-10.2573	32.5145	-4.9375	FALSE
OG0001612	-10.4746	26.9491	-10.407	32.814	-5.86483	FALSE
OG0001613	-11.0852	28.1703	-11.128	34.256	-6.08571	FALSE
OG0001614	-13.5386	33.0771	-14.0378	40.0757	-6.99853	FALSE
OG0001615	-21.8265	49.653	-18.4337	48.8673	0.785649	FALSE
OG0001616	-13.1251	32.2502	-10.1004	32.2009	0.0493083	FALSE
OG0001619	-7.28431	20.5686	-6.05774	24.1155	-3.54687	FALSE
OG0001621	-16.8493	39.6986	-15.4739	42.9479	-3.2492	FALSE
OG0001622	-10.7158	27.4316	-8.56302	29.126	-1.6944	FALSE
OG0001623	-9.43108	24.8622	-8.81493	29.6299	-4.76769	FALSE
OG0001624	-17.1714	40.3428	-15.9339	43.8678	-3.52501	FALSE
OG0001625	-13.6807	33.3614	-11.5562	35.1125	-1.75102	FALSE
OG0001626	-5.32008	16.6402	-5.69645	23.3929	-6.75275	FALSE
OG0001627	-11.9317	29.8634	-11.4855	34.971	-5.10757	FALSE
OG0001628	-12.2296	30.4592	-13.0911	38.1823	-7.72308	FALSE
OG0001630	-15.2275	36.4549	-15.2378	42.4756	-6.02065	FALSE
OG0001631	-12.4155	30.8311	-12.2416	36.4831	-5.65205	FALSE
OG0001632	-13.4801	32.9603	-11.8273	35.6545	-2.69426	FALSE
OG0001633	-13.0976	32.1952	-12.4084	36.8168	-4.62162	FALSE
OG0001634	-15.0286	36.0572	-14.24	40.48	-4.42281	FALSE
OG0001635	-13.9028	33.8056	-14.8371	41.6741	-7.86856	FALSE
OG0001636	-13.7581	33.5162	-12.606	37.212	-3.69583	FALSE
OG0001637	-10.375	26.75	-10.831	33.6621	-6.91209	FALSE
OG0001638	-11.3058	28.6115	-10.0144	32.0289	-3.41735	FALSE
OG0001639	-7.94901	21.898	-7.56183	27.1237	-5.22563	FALSE
OG0001640	-17.1026	40.2051	-16.2778	44.5555	-4.35037	FALSE
OG0001641	-13.6687	33.3373	-15.1377	42.2753	-8.93798	FALSE
OG0001642	-13.4194	32.8389	-12.8742	37.7484	-4.90954	FALSE
OG0001643	-12.4136	30.8271	-14.2189	40.4378	-9.61066	FALSE
OG0001644	-12.8126	31.6251	-12.2577	36.5155	-4.89033	FALSE
OG0001645	-9.02765	24.0553	-8.25492	28.5098	-4.45455	FALSE
OG0001646	-12.1689	30.3379	-12.7679	37.5358	-7.19793	FALSE
OG0001647	-15.5976	37.1952	-14.861	41.7219	-4.52671	FALSE
OG0001648	-12.6462	31.2924	-11.1898	34.3797	-3.08731	FALSE
OG0001649	-5.32008	16.6402	-5.69645	23.3929	-6.75275	FALSE
OG0001650	-6.34727	18.6945	-7.55215	27.1043	-8.40976	FALSE
OG0001651	-17.6635	41.3271	-16.1412	44.2825	-2.95536	FALSE
OG0001652	-16.498	38.996	-12.8371	37.6743	1.32168	FALSE
OG0001653	-6.62727	19.2545	-6.30494	24.6099	-5.35534	FALSE
OG0001654	-14.7334	35.4668	-16.3981	44.7962	-9.32948	FALSE
OG0001655	-6.61839	19.2368	-5.29479	22.5896	-3.3528	FALSE
OG0001656	-10.4253	26.8507	-9.99969	31.9994	-5.1487	FALSE
OG0001657	-7.56571	21.1314	-6.16669	24.3334	-3.20197	FALSE
OG0001658	-13.0798	32.1596	-13.227	38.4539	-6.29426	FALSE
OG0001659	-14.22	34.44	-12.6481	37.2962	-2.85622	FALSE
OG0001661	-13.0256	32.0512	-14.1348	40.2697	-8.21849	FALSE
OG0001662	-13.3056	32.6111	-10.7073	33.4146	-0.803494	FALSE
OG0001663	-11.0144	28.0287	-10.2979	32.5958	-4.56704	FALSE
OG0001664	-16.6885	39.377	-17.1477	46.2954	-6.91846	FALSE
OG0001665	-9.80814	25.6163	-9.73813	31.4763	-5.85998	FALSE
OG0001666	-11.9923	29.9845	-11.0008	34.0015	-4.01697	FALSE
OG0001667	-8.89743	23.7949	-8.18684	28.3737	-4.57881	FALSE
OG0001668	-8.03345	22.0669	-7.46432	26.9286	-4.86173	FALSE
OG0001669	-10.9683	27.9366	-10.7386	33.4771	-5.54056	FALSE
OG0001670	-8.85045	23.7009	-8.1843	28.3686	-4.66771	FALSE
OG0001671	-18.4536	42.9072	-17.3444	46.6887	-3.78152	FALSE
OG0001672	-7.06546	20.1309	-7.65077	27.3015	-7.17062	FALSE
OG0001673	-15.7481	37.4961	-15.8881	43.7762	-6.28002	FALSE
OG0001674	-14.6841	35.3682	-12.5135	37.027	-1.65884	FALSE
OG0001675	-14.375	34.75	-14.7755	41.551	-6.80096	FALSE
OG0001676	-12.7892	31.5785	-12.8753	37.7506	-6.17215	FALSE
OG0001677	-12.4069	30.8138	-12.4378	36.8757	-6.06191	FALSE
OG0001678	-10.8251	27.6502	-10.2558	32.5115	-4.86138	FALSE
OG0001679	-11.6015	29.203	-12.0073	36.0146	-6.81165	FALSE
OG0001680	-11.2302	28.4603	-11.5163	35.0327	-6.57237	FALSE
OG0001681	-14.5553	35.1106	-13.7935	39.5871	-4.47646	FALSE
OG0001682	-14.9712	35.9423	-14.3367	40.6733	-4.73098	FALSE
OG0001683	-16.9725	39.9451	-14.8532	41.7064	-1.76129	FALSE
OG0001684	-11.8806	29.7612	-10.8286	33.6572	-3.89606	FALSE
OG0001685	-12.8488	31.6977	-11.0325	34.065	-2.36728	FALSE
OG0001686	-13.0061	32.0123	-11.6153	35.2307	-3.21842	FALSE
OG0001687	-12.3615	30.7229	-12.1224	36.2448	-5.52192	FALSE
OG0001688	-18.0484	42.0968	-14.6491	41.2982	0.798506	FALSE
OG0001689	-31.8966	69.7933	-28.7438	69.4875	0.305764	FALSE
OG0001690	-13.3952	32.7904	-10.6539	33.3077	-0.517336	FALSE
OG0001691	-19.0886	44.1771	-15.1263	42.2525	1.9246	FALSE
OG0001693	-12.1546	30.3092	-11.0919	34.1839	-3.87472	FALSE
OG0001695	-10.4541	26.9083	-10.6555	33.311	-6.40268	FALSE
OG0001696	-8.94007	23.8801	-8.74528	29.4906	-5.61043	FALSE
OG0001697	-7.10275	20.2055	-6.25589	24.5118	-4.30628	FALSE
OG0001698	-5.14506	16.2901	-5.38647	22.7729	-6.48281	FALSE
OG0001699	-13.4532	32.9065	-12.921	37.842	-4.93558	FALSE
OG0001700	-12.6486	31.2971	-11.2688	34.5375	-3.24039	FALSE
OG0001701	-14.0683	34.1367	-11.7898	35.5797	-1.44301	FALSE
OG0001702	-15.0881	36.1762	-16.5564	45.1128	-8.93652	FALSE
OG0001703	-14.4114	34.8228	-14.1363	40.2726	-5.44983	FALSE
OG0001704	-14.2797	34.5594	-13.8194	39.6389	-5.07949	FALSE
OG0001705	-10.6076	27.2152	-11.0096	34.0191	-6.80386	FALSE
OG0001706	-13.9819	33.9639	-13.5702	39.1405	-5.1766	FALSE
OG0001707	-10.7139	27.4278	-10.2574	32.5147	-5.08694	FALSE
OG0001708	-13.7932	33.5863	-13.4124	38.8247	-5.23843	FALSE
OG0001709	-15.1907	36.3814	-13.7448	39.4897	-3.10825	FALSE
OG0001710	-9.74241	25.4848	-10.2861	32.5722	-7.08742	FALSE
OG0001711	-15.4887	36.9773	-14.9933	41.9866	-5.00926	FALSE
OG0001712	-9.39304	24.7861	-9.51911	31.0382	-6.25214	FALSE
OG0001713	-14.5211	35.0422	-13.1493	38.2985	-3.2563	FALSE
OG0001714	-18.9768	43.9535	-18.3371	48.6743	-4.72075	FALSE
OG0001715	-17.1844	40.3688	-16.7485	45.4969	-5.12814	FALSE
OG0001716	-11.4351	28.8701	-10.0799	32.1598	-3.28968	FALSE
OG0001717	-13.2043	32.4085	-11.1276	34.2551	-1.84656	FALSE
OG0001718	-8.04446	22.0889	-8.09122	28.1824	-6.09351	FALSE
OG0001719	-16.6839	39.3678	-16.6931	45.3862	-6.01844	FALSE
OG0001720	-13.2721	32.5443	-11.6887	35.3775	-2.83322	FALSE
OG0001721	-12.2646	30.5291	-11.6963	35.3926	-4.86347	FALSE
OG0001722	-12.8896	31.7793	-12.2229	36.4459	-4.66663	FALSE
OG0001723	-12.32	30.64	-11.3794	34.7588	-4.11884	FALSE
OG0001724	-10.4621	26.9243	-8.67156	29.3431	-2.41884	FALSE
OG0001725	-8.24807	22.4961	-7.4874	26.9748	-4.47866	FALSE
OG0001726	-11.7578	29.5157	-9.92192	31.8438	-2.32814	FALSE
OG0001727	-14.3813	34.7626	-13.5735	39.1469	-4.38428	FALSE
OG0001728	-14.2609	34.5218	-12.1399	36.2799	-1.75804	FALSE
OG0001729	-11.7801	29.5601	-11.4389	34.8778	-5.31769	FALSE
OG0001730	-15.6845	37.3689	-15.1148	42.2295	-4.8606	FALSE
OG0001731	-13.0727	32.1453	-12.8119	37.6238	-5.47851	FALSE
OG0001732	-12.7668	31.5336	-11.654	35.3081	-3.77451	FALSE
OG0001733	-12.5408	31.0817	-11.642	35.2839	-4.20225	FALSE
OG0001734	-9.42088	24.8418	-9.4855	30.971	-6.12925	FALSE
OG0001735	-11.8594	29.7188	-11.2066	34.4131	-4.69429	FALSE
OG0001736	-10.5916	27.1831	-10.2737	32.5475	-5.36433	FALSE
OG0001737	-12.3182	30.6365	-12.102	36.2039	-5.56745	FALSE
OG0001738	-10.9371	27.8741	-10.0731	32.1462	-4.27204	FALSE
OG0001739	-3.02751	12.055	-2.83432	17.6686	-5.61363	FALSE
OG0001740	-23.0418	52.0836	-23.7672	59.5343	-7.45079	FALSE
OG0001741	-10.9702	27.9404	-9.33167	30.6633	-2.72294	FALSE
OG0001742	-12.3325	30.665	-11.2852	34.5705	-3.90544	FALSE
OG0001743	-13.7875	33.5749	-11.1725	34.345	-0.770056	FALSE
OG0001744	-13.7263	33.4525	-13.3481	38.6963	-5.24374	FALSE
OG0001745	-11.568	29.136	-10.8	33.6001	-4.46408	FALSE
OG0001746	-11.2527	28.5055	-11.9612	35.9224	-7.41695	FALSE
OG0001747	-13.0491	32.0982	-11.5588	35.1176	-3.01941	FALSE
OG0001748	-11.9495	29.899	-11.0844	34.1689	-4.26989	FALSE
OG0001749	-12.5271	31.0542	-12.1972	36.3944	-5.34017	FALSE
OG0001750	-8.20843	22.4169	-8.01018	28.0204	-5.6035	FALSE
OG0001751	-10.1343	26.2685	-10.2463	32.4925	-6.224	FALSE
OG0001752	-14.7257	35.4513	-13.2973	38.5947	-3.14337	FALSE
OG0001753	-14.7004	35.4008	-14.2471	40.4942	-5.09343	FALSE
OG0001754	-10.8568	27.7136	-10.4922	32.9844	-5.27086	FALSE
OG0001755	-14.8115	35.6231	-13.8805	39.7609	-4.13786	FALSE
OG0001756	-16.2577	38.5153	-16.0049	44.0098	-5.49449	FALSE
OG0001757	-9.53703	25.0741	-9.44346	30.8869	-5.81286	FALSE
OG0001758	-13.6036	33.2071	-16.8585	45.717	-12.5099	FALSE
OG0001759	-10.694	27.3881	-11.0328	34.0657	-6.67761	FALSE
OG0001760	-13.7681	33.5361	-13.6164	39.2328	-5.69665	FALSE
OG0001761	-11.6339	29.2677	-11.5863	35.1725	-5.90482	FALSE
OG0001762	-18.4911	42.9822	-17.2039	46.4078	-3.42554	FALSE
OG0001763	-7.62792	21.2558	-6.82272	25.6454	-4.38962	FALSE
OG0001764	-14.4365	34.8731	-13.7731	39.5462	-4.67313	FALSE
OG0001765	-9.16752	24.335	-7.90153	27.8031	-3.46802	FALSE
OG0001766	-8.63048	23.261	-6.99299	25.986	-2.72501	FALSE
OG0001767	-10.429	26.8579	-9.7089	31.4178	-4.55988	FALSE
OG0001768	-19.5066	45.0133	-17.6129	47.2258	-2.21253	FALSE
OG0001770	-11.362	28.7241	-11.1028	34.2056	-5.48155	FALSE
OG0001771	-14.7418	35.4837	-12.3387	36.6775	-1.19381	FALSE
OG0001772	-7.97138	21.9428	-8.15699	28.314	-6.37121	FALSE
OG0001773	-12.4133	30.8266	-11.8216	35.6432	-4.81655	FALSE
OG0001774	-9.42088	24.8418	-9.26112	30.5222	-5.68049	FALSE
OG0001775	-14.0712	34.1424	-13.5079	39.0157	-4.87328	FALSE
OG0001777	-13.3432	32.6865	-13.9123	39.8246	-7.13814	FALSE
OG0001778	-14.0757	34.1514	-12.7922	37.5844	-3.43301	FALSE
OG0001779	-5.16345	16.3269	-4.60593	21.2119	-4.88495	FALSE
OG0001780	-14.5598	35.1196	-13.1425	38.285	-3.16536	FALSE
OG0001781	-4.19256	14.3851	-4.47248	20.945	-6.55984	FALSE
OG0001782	-11.0208	28.0415	-10.2107	32.4214	-4.37993	FALSE
OG0001783	-9.43108	24.8622	-9.27448	30.549	-5.6868	FALSE
OG0001784	-9.81603	25.6321	-9.44808	30.8962	-5.2641	FALSE
OG0001785	-11.3775	28.755	-11.6099	35.2198	-6.46486	FALSE
OG0001786	-14.8953	35.7907	-12.6442	37.2885	-1.49779	FALSE
OG0001787	-21.8722	49.7444	-21.4088	54.8176	-5.07318	FALSE
OG0001788	-11.6602	29.3204	-11.5723	35.1446	-5.82424	FALSE
OG0001789	-16.9388	39.8776	-15.2432	42.4863	-2.60872	FALSE
OG0001790	-13.7564	33.5129	-13.9883	39.9766	-6.46372	FALSE
OG0001791	-10.4885	26.9769	-10.121	32.242	-5.26506	FALSE
OG0001792	-15.7155	37.431	-13.7173	39.4346	-2.00357	FALSE
OG0001793	-19.1004	44.2009	-16.9049	45.8099	-1.60901	FALSE
OG0001794	-16.1843	38.3685	-14.558	41.1159	-2.74742	FALSE
OG0001795	-13.2538	32.5077	-14.1473	40.2946	-7.7869	FALSE
OG0001796	-17.5716	41.1433	-16.8706	45.7412	-4.59788	FALSE
OG0001797	-14.3507	34.7013	-14.045	40.0899	-5.38856	FALSE
OG0001798	-10.7194	27.4388	-10.5624	33.1248	-5.68599	FALSE
OG0001799	-11.5348	29.0696	-11.5227	35.0454	-5.97585	FALSE
OG0001800	-12.3424	30.6848	-13.4739	38.9478	-8.26298	FALSE
OG0001801	-11.679	29.358	-11.5479	35.0957	-5.73774	FALSE
OG0001802	-10.704	27.408	-10.0478	32.0956	-4.68758	FALSE
OG0001803	-10.1333	26.2665	-9.95462	31.9092	-5.64271	FALSE
OG0001804	-15.7496	37.4992	-13.7169	39.4337	-1.93453	FALSE
OG0001805	-12.0875	30.1749	-10.9208	33.8417	-3.66676	FALSE
OG0001806	-12.2389	30.4778	-11.8026	35.6052	-5.12749	FALSE
OG0001807	-14.2139	34.4277	-16.3845	44.769	-10.3413	FALSE
OG0001808	-13.9784	33.9568	-10.9702	33.9404	0.0164397	FALSE
OG0001809	-14.0795	34.1589	-13.9395	39.879	-5.72005	FALSE
OG0001810	-12.1973	30.3947	-11.5516	35.1033	-4.70862	FALSE
OG0001811	-10.3804	26.7607	-9.15204	30.3041	-3.54334	FALSE
OG0001812	-9.05558	24.1112	-8.9254	29.8508	-5.73964	FALSE
OG0001813	-12.5034	31.0067	-11.8152	35.6303	-4.6236	FALSE
OG0001814	-10.6804	27.3607	-10.209	32.4179	-5.05723	FALSE
OG0001815	-12.7078	31.4155	-12.7634	37.5269	-6.11135	FALSE
OG0001816	-7.97138	21.9428	-8.15699	28.314	-6.37121	FALSE
OG0001817	-15.6182	37.2365	-12.9741	37.9481	-0.71167	FALSE
OG0001818	-13.1593	32.3186	-9.80677	31.6135	0.705035	FALSE
OG0001820	-13.0575	32.115	-12.8944	37.7889	-5.67382	FALSE
OG0001821	-12.7321	31.4643	-12.8181	37.6363	-6.17201	FALSE
OG0001822	-12.4342	30.8684	-10.9386	33.8772	-3.00872	FALSE
OG0001823	-9.3791	24.7582	-8.61285	29.2257	-4.46749	FALSE
OG0001824	-14.0656	34.1312	-13.7422	39.4843	-5.35313	FALSE
OG0001825	-14.6722	35.3444	-14.6916	41.3832	-6.03884	FALSE
OG0001826	-13.5917	33.1835	-13.8463	39.6926	-6.5091	FALSE
OG0001827	-11.1781	28.3562	-10.301	32.6021	-4.24588	FALSE
OG0001828	-13.3618	32.7235	-12.2724	36.5449	-3.82139	FALSE
OG0001829	-15.0775	36.155	-14.5009	41.0019	-4.84685	FALSE
OG0001830	-7.97138	21.9428	-8.15699	28.314	-6.37121	FALSE
OG0001831	-11.0618	28.1237	-10.9548	33.9097	-5.78601	FALSE
OG0001832	-11.9495	29.899	-11.0844	34.1689	-4.26989	FALSE
OG0001833	-18.1505	42.3011	-18.8054	49.6107	-7.30966	FALSE
OG0001834	-6.11605	18.2321	-6.78434	25.5687	-7.33658	FALSE
OG0001835	-12.1664	30.3328	-11.515	35.0301	-4.69728	FALSE
OG0001836	-12.4632	30.9264	-11.5108	35.0215	-4.09509	FALSE
OG0001837	-14.4809	34.9618	-15.0424	42.0849	-7.12306	FALSE
OG0001838	-13.2314	32.4628	-12.99	37.98	-5.5172	FALSE
OG0001839	-18.7837	43.5673	-17.5764	47.1528	-3.5855	FALSE
OG0001840	-15.4329	36.8657	-15.1818	42.3636	-5.49783	FALSE
OG0001841	-8.54807	23.0961	-7.21829	26.4366	-3.34043	FALSE
OG0001842	-7.52905	21.0581	-6.55864	25.1173	-4.05919	FALSE
OG0001843	-9.16058	24.3212	-8.69645	29.3929	-5.07173	FALSE
OG0001844	-7.27763	20.5553	-7.11979	26.2396	-5.68432	FALSE
OG0001845	-12.2697	30.5394	-10.6192	33.2385	-2.69909	FALSE
OG0001846	-17.2932	40.5864	-16.9147	45.8293	-5.24296	FALSE
OG0001847	-10.6902	27.3804	-10.6282	33.2564	-5.87605	FALSE
OG0001848	-13.4008	32.8016	-13.487	38.9741	-6.17252	FALSE
OG0001850	-10.9715	27.943	-7.81229	27.6246	0.318448	FALSE
OG0001851	-13.205	32.4101	-10.4846	32.9692	-0.55916	FALSE
OG0001852	-12.32	30.64	-11.3794	34.7588	-4.11884	FALSE
OG0001853	-9.46724	24.9345	-9.89758	31.7952	-6.86069	FALSE
OG0001854	-6.65147	19.3029	-5.93211	23.8642	-4.56129	FALSE
OG0001855	-11.9298	29.8597	-8.41051	28.821	1.03863	FALSE
OG0001857	-12.8631	31.7262	-12.8518	37.7036	-5.97745	FALSE
OG0001858	-8.7586	23.5172	-7.43607	26.8721	-3.35494	FALSE
OG0001859	-13.5227	33.0454	-11.8483	35.6967	-2.65127	FALSE
OG0001860	-10.7981	27.5963	-10.912	33.8239	-6.22763	FALSE
OG0001862	-13.1995	32.399	-13.1341	38.2683	-5.8693	FALSE
OG0001863	-7.67282	21.3456	-5.97259	23.9452	-2.59954	FALSE
OG0001864	-10.8251	27.6502	-10.2558	32.5115	-4.86138	FALSE
OG0001865	-11.9164	29.8328	-11.7907	35.5813	-5.74849	FALSE
OG0001866	-11.1774	28.3548	-10.8889	33.7777	-5.42296	FALSE
OG0001868	-8.89743	23.7949	-9.338	30.676	-6.88112	FALSE
OG0001869	-5.41635	16.8327	-5.02888	22.0578	-5.22507	FALSE
OG0001870	-7.97138	21.9428	-8.15699	28.314	-6.37121	FALSE
OG0001871	-3.02751	12.055	-2.83432	17.6686	-5.61363	FALSE
OG0001872	-10.89	27.7801	-9.67467	31.3493	-3.56925	FALSE
OG0001873	-13.8908	33.7817	-12.7418	37.4836	-3.70193	FALSE
OG0001874	-13.1254	32.2508	-15.0893	42.1786	-9.92788	FALSE
OG0001876	-12.4542	30.9084	-12.1251	36.2501	-5.34169	FALSE
OG0001877	-12.3895	30.7791	-11.357	34.7139	-3.93483	FALSE
OG0001879	-8.82152	23.643	-8.95699	29.914	-6.27094	FALSE
OG0001880	-9.79968	25.5994	-8.27414	28.5483	-2.9489	FALSE
OG0001881	-13.9574	33.9148	-13.7949	39.5899	-5.67507	FALSE
OG0001882	-13.4937	32.9873	-12.3289	36.6577	-3.6704	FALSE
OG0001883	-8.02774	22.0555	-6.4451	24.8902	-2.83472	FALSE
OG0001884	-6.58014	19.1603	-6.34634	24.6927	-5.53239	FALSE
OG0001885	-15.2893	36.5785	-15.2512	42.5024	-5.92392	FALSE
OG0001886	-8.53973	23.0795	-7.88748	27.775	-4.6955	FALSE
OG0001887	-12.6141	31.2281	-16.8729	45.7458	-14.5177	FALSE
OG0001888	-14.0964	34.1927	-14.2306	40.4611	-6.26843	FALSE
OG0001889	-10.7089	27.4178	-10.3707	32.7414	-5.32359	FALSE
OG0001890	-12.0453	30.0906	-11.6112	35.2224	-5.13177	FALSE
OG0001891	-8.70498	23.41	-7.18907	26.3781	-2.96819	FALSE
OG0001892	-16.1823	38.3646	-12.186	36.372	1.99256	FALSE
OG0001893	-11.2527	28.5055	-11.9612	35.9224	-7.41695	FALSE
OG0001894	-9.2659	24.5318	-8.52828	29.0566	-4.52476	FALSE
OG0001895	-8.4677	22.9354	-7.38437	26.7687	-3.83333	FALSE
OG0001896	-10.6162	27.2325	-10.1246	32.2492	-5.01677	FALSE
OG0001897	-19.0107	44.0214	-18.4379	48.8758	-4.8544	FALSE
OG0001898	-10.3695	26.7391	-10.4439	32.8877	-6.14866	FALSE
OG0001899	-15.6003	37.2006	-16.1108	44.2216	-7.02096	FALSE
OG0001900	-16.011	38.0221	-12.3934	36.7868	1.23531	FALSE
OG0001901	-13.2314	32.4628	-12.99	37.98	-5.5172	FALSE
OG0001902	-12.4525	30.905	-12.602	37.204	-6.29899	FALSE
OG0001903	-4.47804	14.9561	-4.34653	20.6931	-5.73698	FALSE
OG0001904	-13.4444	32.8889	-14.6284	41.2569	-8.36798	FALSE
OG0001905	-16.6396	39.2791	-14.3729	40.7458	-1.46672	FALSE
OG0001906	-14.4466	34.8931	-14.1295	40.2591	-5.36597	FALSE
OG0001907	-11.6591	29.3181	-10.6911	33.3822	-4.06404	FALSE
OG0001908	-12.6856	31.3712	-10.8022	33.6045	-2.2333	FALSE
OG0001909	-12.4632	30.9264	-11.5108	35.0215	-4.09509	FALSE
OG0001910	-11.636	29.2721	-10.927	33.8541	-4.58201	FALSE
OG0001911	-8.66456	23.3291	-8.489	28.978	-5.64889	FALSE
OG0001912	-13.4937	32.9873	-12.3289	36.6577	-3.6704	FALSE
OG0001913	-12.2447	30.4894	-12.0155	36.0311	-5.54163	FALSE
OG0001914	-12.0186	30.0373	-12.1586	36.3172	-6.27989	FALSE
OG0001915	-9.23289	24.4658	-9.2594	30.5188	-6.05301	FALSE
OG0001916	-15.0694	36.1388	-12.6238	37.2477	-1.10882	FALSE
OG0001917	-11.1412	28.2825	-10.5758	33.1516	-4.86907	FALSE
OG0001918	-14.6603	35.3205	-12.7455	37.491	-2.17052	FALSE
OG0001919	-16.6351	39.2701	-15.0825	42.1651	-2.89491	FALSE
OG0001920	-10.9613	27.9226	-10.7447	33.4894	-5.56679	FALSE
OG0001921	-9.84474	25.6895	-9.80872	31.6174	-5.92795	FALSE
OG0001922	-11.9012	29.8023	-11.3666	34.7332	-4.93085	FALSE
OG0001923	-14.2738	34.5475	-12.7605	37.521	-2.97352	FALSE
OG0001924	-10.4351	26.8703	-10.1122	32.2244	-5.35408	FALSE
OG0001925	-12.1773	30.3546	-11.8318	35.6637	-5.3091	FALSE
OG0001926	-14.4698	34.9396	-11.3642	34.7285	0.211117	FALSE
OG0001927	-15.9364	37.8728	-14.1658	40.3317	-2.45886	FALSE
OG0001928	-9.05226	24.1045	-8.22555	28.4511	-4.34659	FALSE
OG0001929	-13.3669	32.7337	-13.6598	39.3197	-6.58591	FALSE
OG0001930	-12.9004	31.8008	-12.6301	37.2601	-5.45933	FALSE
OG0001931	-12.14	30.28	-12.3003	36.6007	-6.32067	FALSE
OG0001932	-17.197	40.394	-16.4827	44.9655	-4.57144	FALSE
OG0001933	-13.4174	32.8347	-12.2469	36.4938	-3.65905	FALSE
OG0001934	-12.2068	30.4135	-11.4184	34.8368	-4.4233	FALSE
OG0001935	-5.65577	17.3115	-5.62251	23.245	-5.93348	FALSE
OG0001936	-12.3392	30.6784	-12.9508	37.9015	-7.22316	FALSE
OG0001937	-5.32008	16.6402	-5.69645	23.3929	-6.75275	FALSE
OG0001938	-13.4815	32.963	-12.7109	37.4218	-4.45881	FALSE
OG0001939	-13.3415	32.6831	-11.8799	35.7598	-3.07674	FALSE
OG0001940	-9.22165	24.4433	-8.12457	28.2491	-3.80584	FALSE
OG0001941	-9.76545	25.5309	-10.1422	32.2844	-6.7535	FALSE
OG0001942	-13.9975	33.995	-13.0051	38.0102	-4.01517	FALSE
OG0001943	-17.5803	41.1607	-17.1286	46.2572	-5.09651	FALSE
OG0001944	-10.9429	27.8858	-10.4193	32.8385	-4.9527	FALSE
OG0001945	-8.8958	23.7916	-8.85411	29.7082	-5.91663	FALSE
OG0001946	-13.1068	32.2135	-13.292	38.5841	-6.37051	FALSE
OG0001947	-11.4783	28.9565	-11.7473	35.4947	-6.53811	FALSE
OG0001949	-10.8269	27.6539	-9.78755	31.5751	-3.92121	FALSE
OG0001950	-11.8605	29.721	-11.4444	34.8888	-5.16779	FALSE
OG0001951	-11.4723	28.9447	-9.56045	31.1209	-2.17622	FALSE
OG0001952	-13.0382	32.0763	-14.7584	41.5167	-9.44043	FALSE
OG0001953	-12.7939	31.5878	-11.6851	35.3702	-3.78242	FALSE
OG0001954	-12.3757	30.7514	-11.0494	34.0989	-3.34747	FALSE
OG0001955	-12.7166	31.4332	-13.28	38.56	-7.1268	FALSE
OG0001956	-13.166	32.3319	-13.0178	38.0356	-5.70367	FALSE
OG0001957	-10.8322	27.6643	-9.94365	31.8873	-4.22296	FALSE
OG0001959	-10.9429	27.8858	-8.7363	29.4726	-1.58677	FALSE
OG0001960	-8.65801	23.316	-7.02879	26.0576	-2.74156	FALSE
OG0001961	-10.7421	27.4842	-10.0996	32.1992	-4.71499	FALSE
OG0001963	-13.4136	32.8272	-10.8	33.6	-0.772734	FALSE
OG0001964	-16.0756	38.1513	-15.7687	43.5375	-5.38623	FALSE
OG0001965	-14.6424	35.2848	-14.4803	40.9606	-5.6758	FALSE
OG0001966	-14.3055	34.6109	-13.5563	39.1127	-4.50176	FALSE
OG0001967	-9.60578	25.2116	-10.2154	32.4307	-7.21918	FALSE
OG0001968	-8.95342	23.9068	-8.23277	28.4655	-4.5587	FALSE
OG0001969	-12.3757	30.7514	-10.739	33.4781	-2.72664	FALSE
OG0001970	-9.16752	24.335	-7.90153	27.8031	-3.46802	FALSE
[truncated: 6,996 more rows]

## Sheet: Terrestrial lineage analysis (T
Orthogroup	GR likelihood	GR AIC (K=3)	TR likelihood	TR AIC (K=6)	GR-TR	TR better-fitting than GR? = 13 OGs	OG	net rate in TR (BIRTH-DEATH)	Expanded or Contracted?	net rate in TR background (BIRTH-DEATH)	net rate TR - net rate TR background	More than background?
OG0000067	-17.8597	41.7193	-13.3239	38.6479	3.07147	TRUE	OG0000067	-38.7336	CONTRACTED	-2.40174	-36.3319	TRUE
OG0000313	-13.0311	32.0623	-7.65738	27.3148	4.74752	TRUE	OG0000313	-0.499723	CONTRACTED	0.0805269	-0.58025	TRUE
OG0001896	-9.99707	25.9941	-5.95109	23.9022	2.09196	TRUE	OG0001896	-5.44482	CONTRACTED	-0.138166	-5.30665	TRUE
OG0003615	-8.9215	23.843	-4.41625	20.8325	3.0105	TRUE	OG0003615	-4.82681	CONTRACTED	0.0011131	-4.82792	TRUE
OG0008558	-14.3069	34.6139	-9.29383	30.5877	4.0262	TRUE	OG0008558	-12.267	CONTRACTED	0.292049	-12.559	TRUE
OG0009340	-10.5918	27.1835	-5.88105	23.7621	3.42141	TRUE	OG0009340	-70.9007	CONTRACTED	-9.8143	-61.0864	TRUE
OG0009610	-7.41229	20.8246	-2.30983	16.6197	4.20492	TRUE	OG0009610	-3.5529	CONTRACTED	-46.9502	43.3973	FALSE
OG0011467	-9.69522	25.3904	-5.31357	22.6271	2.7633	TRUE	OG0011467	-15.1127	CONTRACTED	-82.1339	67.0212	FALSE
OG0011944	-9.81974	25.6395	-5.50516	23.0103	2.62916	TRUE	OG0011944	-189.046	CONTRACTED	-1.30097	-187.745	TRUE
OG0013888	-7.2884	20.5768	-1.28432	14.5686	6.00817	TRUE	OG0013888	-31.4329	CONTRACTED	0.0359513	-31.4689	TRUE
OG0013895	-7.2884	20.5768	-1.28432	14.5686	6.00817	TRUE	OG0013895	-31.4329	CONTRACTED	0.0359513	-31.4689	TRUE
OG0014969	-9.27372	24.5474	-5.22954	22.4591	2.08837	TRUE	OG0014969	-5.82256	CONTRACTED	-5.84164	0.01908	FALSE
OG0015003	-6.07152	18.143	-1.63289	15.2658	2.87727	TRUE	OG0015003	-4.68954	CONTRACTED	-78.3545	73.665	FALSE
OG0000002	-35.1876	76.3753	-34.3251	80.6502	-4.27492	FALSE
OG0000003	-35.4668	76.9336	-43.0789	98.1579	-21.2243	FALSE
OG0000004	-42.1865	90.373	-47.4313	106.863	-16.4897	FALSE
OG0000005	-41.9773	89.9546	-50.137	112.274	-22.3195	FALSE
OG0000006	-33.0115	72.0229	-33.9955	79.991	-7.96812	FALSE
OG0000007	-39.5034	85.0068	-43.6774	99.3548	-14.3479	FALSE
OG0000008	-50.3418	106.684	-51.6329	115.266	-8.58225	FALSE
OG0000009	-40.6095	87.219	-40.5314	93.0629	-5.84387	FALSE
OG0000010	-46.2362	98.4724	-59.2535	130.507	-32.0346	FALSE
OG0000012	-50.304	106.608	-50.302	112.604	-5.99587	FALSE
OG0000013	-34.8623	75.7246	-35.3206	82.6412	-6.91661	FALSE
OG0000014	-34.8609	75.7218	-37.2091	86.4181	-10.6963	FALSE
OG0000016	-37.8784	81.7568	-40.6294	93.2588	-11.502	FALSE
OG0000017	-31.7814	69.5628	-29.9779	71.9558	-2.393	FALSE
OG0000018	-44.362	94.724	-51.3948	114.79	-20.0656	FALSE
OG0000019	-35.4034	76.8068	-34.1073	80.2146	-3.4078	FALSE
OG0000020	-33.6714	73.3427	-38.2307	88.4614	-15.1187	FALSE
OG0000021	-33.2166	72.4332	-35.6487	83.2974	-10.8642	FALSE
OG0000022	-44.1665	94.3331	-42.2123	96.4246	-2.09154	FALSE
OG0000023	-25.2359	56.4719	-25.1136	62.2273	-5.75541	FALSE
OG0000024	-32.6654	71.3309	-31.9423	75.8846	-4.55371	FALSE
OG0000025	-30.0471	66.0942	-32.4276	76.8552	-10.761	FALSE
OG0000026	-21.8828	49.7656	-23.0456	58.0911	-8.32553	FALSE
OG0000027	-30.3371	66.6742	-30.9638	73.9275	-7.25335	FALSE
OG0000028	-25.2239	56.4477	-25.2362	62.4725	-6.02476	FALSE
OG0000029	-30.1442	66.2884	-35.6653	83.3306	-17.0422	FALSE
OG0000030	-31.5032	69.0064	-31.2935	74.5871	-5.5807	FALSE
OG0000031	-36.8062	79.6124	-49.1927	110.385	-30.7731	FALSE
OG0000032	-30.0937	66.1873	-29.9993	71.9986	-5.81125	FALSE
OG0000033	-48.484	102.968	-48.2602	108.52	-5.55222	FALSE
OG0000034	-32.8333	71.6667	-32.5075	77.015	-5.34833	FALSE
OG0000035	-25.6308	57.2616	-25.5665	63.133	-5.87135	FALSE
OG0000036	-29.8902	65.7805	-33.7736	79.5472	-13.7667	FALSE
OG0000037	-31.1984	68.3968	-32.1548	76.3096	-7.91276	FALSE
OG0000039	-27.9161	61.8323	-27.3065	66.613	-4.78078	FALSE
OG0000040	-30.4428	66.8855	-33.2551	78.5102	-11.6247	FALSE
OG0000042	-31.4405	68.8811	-43.1846	98.3692	-29.4882	FALSE
OG0000043	-36.1061	78.2123	-35.4967	82.9934	-4.78112	FALSE
OG0000044	-32.0079	70.0158	-38.0441	88.0883	-18.0724	FALSE
OG0000045	-37.3048	80.6095	-45.3469	102.694	-22.0843	FALSE
OG0000046	-25.3101	56.6202	-30.0199	72.0398	-15.4196	FALSE
OG0000047	-32.1736	70.3472	-33.3328	78.6655	-8.3183	FALSE
OG0000048	-23.1798	52.3595	-23.5046	59.0093	-6.64975	FALSE
OG0000049	-28.5911	63.1822	-30.9668	73.9336	-10.7514	FALSE
OG0000050	-35.5372	77.0744	-35.8914	83.7827	-6.70831	FALSE
OG0000051	-37.4026	80.8052	-36.7906	85.5811	-4.77587	FALSE
OG0000052	-27.4329	60.8658	-29.4315	70.863	-9.99717	FALSE
OG0000053	-23.7148	53.4295	-23.8426	59.6852	-6.25569	FALSE
OG0000054	-31.6169	69.2338	-31.4496	74.8993	-5.66547	FALSE
OG0000055	-33.3248	72.6496	-36.9441	85.8883	-13.2387	FALSE
OG0000056	-35.5441	77.0883	-35.6631	83.3262	-6.23793	FALSE
OG0000057	-31.371	68.742	-34.1861	80.3721	-11.6302	FALSE
OG0000058	-27.3289	60.6579	-26.8906	65.7813	-5.12341	FALSE
OG0000059	-30.9745	67.949	-33.1788	78.3576	-10.4086	FALSE
OG0000060	-26.2855	58.571	-27.0498	66.0997	-7.52871	FALSE
OG0000062	-35.6626	77.3252	-36.359	84.718	-7.39286	FALSE
OG0000063	-24.0087	54.0174	-24.4285	60.857	-6.8396	FALSE
OG0000064	-33.564	73.1281	-33.38	78.76	-5.63192	FALSE
OG0000065	-27.347	60.694	-25.7366	63.4732	-2.77923	FALSE
OG0000066	-27.4219	60.8437	-28.3849	68.7698	-7.92614	FALSE
OG0000068	-28.0885	62.177	-31.0979	74.1958	-12.0188	FALSE
OG0000069	-32.7335	71.4671	-38.1294	88.2588	-16.7917	FALSE
OG0000070	-26.2319	58.4637	-26.3269	64.6538	-6.19012	FALSE
OG0000071	-22.0155	50.031	-23.3154	58.6307	-8.59971	FALSE
OG0000072	-24.2379	54.4759	-28.7582	69.5164	-15.0406	FALSE
OG0000073	-29.5853	65.1706	-30.5014	73.0029	-7.83223	FALSE
OG0000074	-29.0729	64.1459	-27.8658	67.7317	-3.58579	FALSE
OG0000075	-33.9867	73.9734	-36.8342	85.6684	-11.6951	FALSE
OG0000076	-35.1703	76.3406	-36.5102	85.0205	-8.67987	FALSE
OG0000077	-34.2103	74.4207	-32.85	77.7	-3.27927	FALSE
OG0000078	-39.1814	84.3629	-41.7089	95.4178	-11.055	FALSE
OG0000079	-31.9863	69.9727	-33.5713	79.1426	-9.16993	FALSE
OG0000080	-27.1971	60.3942	-27.05	66.1	-5.70584	FALSE
OG0000081	-41.6477	89.2954	-46.8534	105.707	-16.4114	FALSE
OG0000082	-32.6053	71.2107	-37.2577	86.5153	-15.3047	FALSE
OG0000083	-32.7651	71.5302	-29.8132	71.6265	-0.0963022	FALSE
OG0000084	-30.3213	66.6426	-28.6215	69.2429	-2.60034	FALSE
OG0000085	-24.4512	54.9025	-23.7316	59.4632	-4.56076	FALSE
OG0000086	-45.1722	96.3443	-49.1851	110.37	-14.0259	FALSE
OG0000087	-24.7811	55.5623	-24.8455	61.6911	-6.12881	FALSE
OG0000088	-25.8996	57.7992	-25.2751	62.5501	-4.75089	FALSE
OG0000089	-16.9163	39.8325	-18.6914	49.3829	-9.55031	FALSE
OG0000090	-23.3055	52.6111	-23.3171	58.6341	-6.02302	FALSE
OG0000091	-30.9233	67.8465	-37.7581	87.5161	-19.6696	FALSE
OG0000092	-25.79	57.5799	-25.8615	63.723	-6.14304	FALSE
OG0000093	-17.5528	41.1055	-17.9236	47.8473	-6.74175	FALSE
OG0000094	-38.4967	82.9935	-40.8888	93.7777	-10.7842	FALSE
OG0000095	-24.544	55.088	-24.7365	61.4731	-6.38503	FALSE
OG0000096	-24.7921	55.5841	-24.4539	60.9079	-5.32377	FALSE
OG0000097	-28.0029	62.0058	-27.8657	67.7313	-5.72549	FALSE
OG0000098	-31.6934	69.3867	-35.4132	82.8265	-13.4398	FALSE
OG0000099	-33.2502	72.5005	-33.7185	79.437	-6.93653	FALSE
OG0000100	-30.3701	66.7402	-32.2361	76.4721	-9.73189	FALSE
OG0000101	-27.7213	61.4426	-27.5138	67.0275	-5.5849	FALSE
OG0000102	-14.4728	34.9455	-13.7857	39.5715	-4.62595	FALSE
OG0000103	-37.7575	81.5151	-38.4627	88.9254	-7.41035	FALSE
OG0000104	-20.7775	47.5551	-21.336	54.672	-7.11689	FALSE
OG0000105	-19.5624	45.1249	-19.4842	50.9684	-5.84352	FALSE
OG0000106	-15.6927	37.3855	-15.8612	43.7223	-6.33684	FALSE
OG0000107	-24.347	54.694	-23.7209	59.4418	-4.74773	FALSE
OG0000108	-35.0113	76.0227	-34.5933	81.1866	-5.16398	FALSE
OG0000109	-23.1426	52.2852	-23.6949	59.3897	-7.10458	FALSE
OG0000110	-27.5313	61.0627	-35.2015	82.4031	-21.3404	FALSE
OG0000111	-30.8892	67.7785	-33.6118	79.2237	-11.4452	FALSE
OG0000112	-25.9984	57.9968	-25.282	62.5639	-4.56706	FALSE
OG0000113	-28.2388	62.4775	-29.4732	70.9464	-8.46884	FALSE
OG0000114	-30.0053	66.0106	-33.2447	78.4894	-12.4788	FALSE
OG0000115	-26.5707	59.1414	-27.9525	67.9049	-8.76352	FALSE
OG0000116	-27.6833	61.3666	-29.2437	70.4875	-9.12093	FALSE
OG0000117	-14.7921	35.5841	-17.6669	47.3339	-11.7497	FALSE
OG0000118	-18.3521	42.7042	-18.2646	48.5292	-5.82496	FALSE
OG0000119	-27.0812	60.1625	-27.8943	67.7885	-7.62607	FALSE
OG0000120	-25.2918	56.5835	-24.9069	61.8138	-5.23024	FALSE
OG0000121	-36.1642	78.3285	-45.8757	103.751	-25.423	FALSE
OG0000122	-23.6265	53.2531	-22.5857	57.1713	-3.91825	FALSE
OG0000123	-26.7898	59.5797	-28.1602	68.3204	-8.74067	FALSE
OG0000124	-27.3585	60.7169	-36.0851	84.1702	-23.4533	FALSE
OG0000125	-29.7932	65.5865	-28.0602	68.1204	-2.53395	FALSE
OG0000126	-30.8365	67.6729	-31.2369	74.4738	-6.80085	FALSE
OG0000127	-28.6402	63.2804	-27.3037	66.6073	-3.32692	FALSE
OG0000128	-35.3216	76.6433	-34.9263	81.8525	-5.20926	FALSE
OG0000129	-22.5771	51.1542	-23.6779	59.3558	-8.20164	FALSE
OG0000130	-25.0601	56.1202	-25.4366	62.8732	-6.75294	FALSE
OG0000131	-25.5457	57.0915	-27.3889	66.7778	-9.68636	FALSE
OG0000132	-32.4545	70.909	-31.7125	75.4251	-4.51608	FALSE
OG0000133	-24.7233	55.4466	-25.1812	62.3625	-6.91583	FALSE
OG0000134	-17.0783	40.1567	-16.8255	45.651	-5.4943	FALSE
OG0000135	-27.8481	61.6961	-27.4529	66.9058	-5.20962	FALSE
OG0000136	-20.5034	47.0068	-21.4149	54.8298	-7.82305	FALSE
OG0000137	-19.8708	45.7416	-20.4936	52.9873	-7.24569	FALSE
OG0000138	-26.8631	59.7262	-25.8504	63.7007	-3.97449	FALSE
OG0000139	-26.237	58.4741	-26.4101	64.8203	-6.34624	FALSE
OG0000140	-28.0108	62.0216	-32.9917	77.9834	-15.9618	FALSE
OG0000141	-36.212	78.4239	-36.9792	85.9583	-7.53441	FALSE
OG0000142	-28.5372	63.0745	-32.1286	76.2572	-13.1827	FALSE
OG0000143	-18.9423	43.8845	-18.8011	49.6022	-5.71766	FALSE
OG0000144	-25.2791	56.5583	-27.1668	66.3337	-9.77539	FALSE
OG0000146	-36.1561	78.3122	-37.8939	87.7878	-9.4756	FALSE
OG0000147	-28.8365	63.673	-28.6182	69.2364	-5.56336	FALSE
OG0000148	-23.2574	52.5147	-27.1648	66.3296	-13.8148	FALSE
OG0000149	-21.8911	49.7822	-22.7696	57.5392	-7.757	FALSE
OG0000150	-12.3398	30.6797	-12.0493	36.0986	-5.41894	FALSE
OG0000151	-23.993	53.986	-24.6981	61.3962	-7.41018	FALSE
OG0000152	-25.1671	56.3343	-25.3614	62.7228	-6.38851	FALSE
OG0000153	-29.5916	65.1831	-29.585	71.1699	-5.98678	FALSE
OG0000154	-28.542	63.0841	-30.8311	73.6621	-10.5781	FALSE
OG0000155	-32.7843	71.5685	-38.9501	89.9002	-18.3317	FALSE
OG0000156	-24.5968	55.1936	-28.0487	68.0973	-12.9037	FALSE
OG0000157	-28.2103	62.4205	-27.6646	67.3291	-4.90856	FALSE
OG0000158	-18.5578	43.1157	-19.1348	50.2697	-7.15397	FALSE
OG0000159	-14.8835	35.7671	-15.6729	43.3458	-7.57874	FALSE
OG0000160	-16.5505	39.101	-15.8468	43.6936	-4.59264	FALSE
OG0000161	-36.7563	79.5125	-37.5266	87.0531	-7.5406	FALSE
OG0000162	-16.3094	38.6189	-16.351	44.702	-6.08318	FALSE
OG0000163	-22.8411	51.6823	-23.0866	58.1731	-6.49088	FALSE
OG0000164	-21.8939	49.7878	-22.7078	57.4155	-7.62768	FALSE
OG0000165	-25.5669	57.1339	-27.2812	66.5623	-9.42849	FALSE
OG0000166	-23.8062	53.6124	-22.7224	57.4447	-3.83231	FALSE
OG0000167	-26.8772	59.7543	-33.5722	79.1443	-19.39	FALSE
OG0000168	-24.9499	55.8998	-25.4859	62.9718	-7.07202	FALSE
OG0000169	-34.9311	75.8621	-42.37	96.74	-20.8779	FALSE
OG0000170	-24.654	55.3081	-23.9281	59.8561	-4.54807	FALSE
OG0000171	-26.3854	58.7707	-25.8616	63.7231	-4.9524	FALSE
OG0000172	-27.1595	60.319	-31.002	74.0039	-13.6849	FALSE
OG0000173	-22.22	50.44	-22.9017	57.8034	-7.36343	FALSE
OG0000174	-23.2068	52.4135	-24.3996	60.7992	-8.38568	FALSE
OG0000175	-36.7022	79.4043	-36.6966	85.3932	-5.98891	FALSE
OG0000176	-21.4182	48.8363	-20.9245	53.849	-5.01266	FALSE
OG0000177	-18.8665	43.733	-17.9118	47.8235	-4.09054	FALSE
OG0000178	-41.6805	89.3609	-40.8449	93.6898	-4.3289	FALSE
OG0000179	-19.0712	44.1425	-19.2326	50.4652	-6.32278	FALSE
OG0000180	-7.93598	21.872	-9.56538	31.1308	-9.2588	FALSE
OG0000181	-4.69856	15.3971	-3.81581	19.6316	-4.2345	FALSE
OG0000182	-30.0229	66.0458	-29.625	71.2499	-5.20418	FALSE
OG0000183	-35.0747	76.1494	-37.2749	86.5497	-10.4004	FALSE
OG0000184	-16.7351	39.4703	-16.9133	45.8265	-6.35624	FALSE
OG0000185	-30.6946	67.3892	-30.7417	73.4833	-6.09409	FALSE
OG0000186	-19.973	45.9461	-20.2224	52.4448	-6.49877	FALSE
OG0000187	-22.1187	50.2373	-23.2393	58.4786	-8.24133	FALSE
OG0000188	-29.1202	64.2404	-26.8503	65.7006	-1.46019	FALSE
OG0000189	-12.8415	31.6831	-14.6457	41.2913	-9.60825	FALSE
OG0000191	-7.43886	20.8777	-8.46198	28.924	-8.04623	FALSE
OG0000192	-15.4	36.7999	-14.2298	40.4596	-3.6597	FALSE
OG0000193	-30.2127	66.4254	-29.3163	70.6325	-4.20717	FALSE
OG0000194	-3.96484	13.9297	-3.79658	19.5932	-5.66348	FALSE
OG0000195	-27.9225	61.845	-28.5182	69.0365	-7.1915	FALSE
OG0000196	-18.256	42.5121	-18.5984	49.1967	-6.68464	FALSE
OG0000197	-6.32399	18.648	-6.80837	25.6167	-6.96876	FALSE
OG0000198	-24.7736	55.5472	-25.3187	62.6374	-7.09018	FALSE
OG0000199	-34.9375	75.875	-38.2711	88.5422	-12.6672	FALSE
OG0000200	-15.8289	37.6579	-15.3874	42.7748	-5.11691	FALSE
OG0000201	-29.7786	65.5573	-28.5247	69.0494	-3.49215	FALSE
OG0000202	-22.9462	51.8925	-23.5727	59.1455	-7.25303	FALSE
OG0000203	-24.2355	54.4709	-24.6885	61.3771	-6.90616	FALSE
OG0000204	-29.0895	64.1789	-27.5622	67.1244	-2.94551	FALSE
OG0000205	-24.5304	55.0609	-25.0708	62.1416	-7.0807	FALSE
OG0000207	-39.1945	84.3889	-39.3835	90.7669	-6.37797	FALSE
OG0000208	-9.13493	24.2699	-9.10389	30.2078	-5.93791	FALSE
OG0000209	-15.9758	37.9517	-17.2267	46.4535	-8.50179	FALSE
OG0000210	-6.36775	18.7355	-6.99061	25.9812	-7.24573	FALSE
OG0000211	-21.0337	48.0674	-21.366	54.732	-6.66461	FALSE
OG0000212	-23.6714	53.3429	-26.4195	64.839	-11.4961	FALSE
OG0000213	-20.5025	47.005	-20.8034	53.6068	-6.60181	FALSE
OG0000214	-22.4326	50.8652	-22.4755	56.9511	-6.08588	FALSE
OG0000215	-13.4022	32.8045	-13.7912	39.5824	-6.77793	FALSE
OG0000216	-25.4681	56.9362	-25.1812	62.3625	-5.42631	FALSE
OG0000217	-10.5943	27.1886	-11.6245	35.2489	-8.06026	FALSE
OG0000218	-30.7657	67.5315	-31.9864	75.9729	-8.44138	FALSE
OG0000219	-19.199	44.3981	-19.1475	50.295	-5.89692	FALSE
OG0000220	-13.7183	33.4366	-15.2279	42.4559	-9.01925	FALSE
OG0000221	-18.8249	43.6498	-18.5326	49.0651	-5.41533	FALSE
OG0000222	-18.0011	42.0023	-17.7202	47.4404	-5.43812	FALSE
OG0000223	-21.4009	48.8018	-22.8252	57.6504	-8.8487	FALSE
OG0000224	-24.4748	54.9497	-24.4692	60.9384	-5.98866	FALSE
OG0000225	-20.0888	46.1776	-19.8412	51.6823	-5.50468	FALSE
OG0000226	-11.5281	29.0562	-12.1086	36.2172	-7.16095	FALSE
OG0000227	-25.2304	56.4607	-25.5177	63.0354	-6.57468	FALSE
OG0000228	-31.7705	69.5409	-37.7269	87.4538	-17.9129	FALSE
OG0000229	-34.6791	75.3582	-34.5443	81.0886	-5.73039	FALSE
OG0000230	-19.9015	45.8031	-19.5141	51.0282	-5.22509	FALSE
OG0000231	-30.1841	66.3683	-29.6045	71.209	-4.84077	FALSE
OG0000232	-26.7833	59.5665	-26.8901	65.7801	-6.21361	FALSE
OG0000233	-18.4216	42.8433	-17.5332	47.0664	-4.2231	FALSE
OG0000234	-18.4694	42.9388	-19.2695	50.539	-7.60019	FALSE
OG0000235	-22.8867	51.7733	-22.6183	57.2367	-5.46333	FALSE
OG0000236	-28.1707	62.3415	-30.8077	73.6154	-11.2739	FALSE
OG0000237	-27.3119	60.6239	-27.6784	67.3568	-6.73294	FALSE
OG0000238	-22.9767	51.9535	-22.9599	57.9199	-5.96637	FALSE
OG0000239	-24.1556	54.3111	-23.1444	58.2888	-3.97761	FALSE
OG0000240	-11.7962	29.5923	-10.8134	33.6267	-4.0344	FALSE
OG0000241	-18.8999	43.7997	-19.2778	50.5555	-6.75577	FALSE
OG0000242	-26.393	58.786	-27.0628	66.1256	-7.33959	FALSE
OG0000243	-20.4323	46.8646	-20.4471	52.8942	-6.02963	FALSE
OG0000244	-18.6286	43.2571	-18.217	48.4341	-5.17696	FALSE
OG0000245	-17.0018	40.0037	-17.1092	46.2184	-6.21471	FALSE
OG0000247	-23.0857	52.1715	-22.6608	57.3216	-5.15012	FALSE
OG0000248	-13.3922	32.7844	-13.348	38.6959	-5.91155	FALSE
OG0000249	-29.5	65.0001	-29.6746	71.3492	-6.34914	FALSE
OG0000250	-24.762	55.524	-24.9899	61.9799	-6.45588	FALSE
OG0000251	-25.0921	56.1842	-24.1831	60.3662	-4.182	FALSE
OG0000252	-24.2745	54.549	-24.4313	60.8626	-6.31359	FALSE
OG0000253	-29.4269	64.8537	-26.9835	65.9669	-1.11321	FALSE
OG0000254	-7.83643	21.6729	-6.88991	25.7798	-4.10696	FALSE
OG0000255	-16.467	38.9339	-15.9624	43.9247	-4.9908	FALSE
OG0000256	-28.7336	63.4673	-30.3107	72.6215	-9.15417	FALSE
OG0000257	-22.5476	51.0952	-20.8392	53.6785	-2.58332	FALSE
OG0000258	-12.7143	31.4286	-12.5725	37.145	-5.71644	FALSE
OG0000259	-20.8891	47.7783	-20.7001	53.4002	-5.62188	FALSE
OG0000260	-14.1544	34.3089	-14.6532	41.3064	-6.99755	FALSE
OG0000261	-28.7599	63.5197	-31.3952	74.7903	-11.2706	FALSE
OG0000262	-31.6185	69.237	-34.5183	81.0366	-11.7996	FALSE
OG0000263	-12.3875	30.775	-12.0427	36.0854	-5.31035	FALSE
OG0000264	-22.9774	51.9548	-22.2145	56.4289	-4.47418	FALSE
OG0000265	-14.0718	34.1435	-12.0152	36.0305	-1.88692	FALSE
OG0000266	-3.41711	12.8342	-5.13711	22.2742	-9.44	FALSE
OG0000267	-24.0565	54.1131	-24.8373	61.6747	-7.56159	FALSE
OG0000268	-25.7092	57.4183	-26.2401	64.4802	-7.06183	FALSE
OG0000269	-22.7865	51.573	-23.9306	59.8612	-8.28811	FALSE
OG0000270	-13.4526	32.9052	-13.7495	39.499	-6.59386	FALSE
OG0000271	-18.4859	42.9718	-18.8307	49.6615	-6.6897	FALSE
OG0000272	-27.1134	60.2268	-25.7352	63.4703	-3.24353	FALSE
OG0000273	-11.3816	28.7632	-11.8665	35.7329	-6.96971	FALSE
OG0000274	-17.0811	40.1621	-16.1088	44.2177	-4.05555	FALSE
OG0000275	-11.0224	28.0449	-10.887	33.774	-5.72915	FALSE
OG0000276	-7.04099	20.082	-6.94002	25.88	-5.79807	FALSE
OG0000277	-20.4137	46.8274	-19.7907	51.5814	-4.754	FALSE
OG0000278	-6.70732	19.4146	-7.32357	26.6471	-7.23251	FALSE
OG0000279	-22.6971	51.3942	-22.0921	56.1843	-4.7901	FALSE
OG0000280	-15.0457	36.0914	-14.5494	41.0988	-5.00745	FALSE
OG0000281	-22.2324	50.4648	-22.1355	56.2709	-5.8061	FALSE
OG0000282	-23.2643	52.5286	-23.8399	59.6798	-7.15113	FALSE
OG0000283	-26.8434	59.6867	-29.863	71.7259	-12.0392	FALSE
OG0000284	-21.9767	49.9534	-24.0787	60.1574	-10.2039	FALSE
OG0000285	-31.7069	69.4138	-30.7476	73.4951	-4.08129	FALSE
OG0000286	-21.9364	49.8729	-26.876	65.752	-15.8791	FALSE
OG0000287	-17.8511	41.7022	-17.5648	47.1296	-5.42747	FALSE
OG0000288	-9.01939	24.0388	-9.50763	31.0153	-6.97648	FALSE
OG0000289	-14.3008	34.6016	-14.7035	41.407	-6.80547	FALSE
OG0000290	-19.4766	44.9533	-18.6832	49.3665	-4.41319	FALSE
OG0000291	-22.5092	51.0184	-25.0959	62.1917	-11.1734	FALSE
OG0000292	-7.76511	21.5302	-8.14065	28.2813	-6.75108	FALSE
OG0000293	-17.3481	40.6963	-16.9058	45.8116	-5.11532	FALSE
OG0000294	-20.0459	46.0919	-20.6083	53.2167	-7.12479	FALSE
OG0000295	-21.253	48.506	-18.8019	49.6038	-1.09786	FALSE
OG0000296	-8.79892	23.5978	-9.22451	30.449	-6.85118	FALSE
OG0000297	-22.838	51.6759	-21.9949	55.9898	-4.31389	FALSE
OG0000298	-19.0138	44.0276	-19.3924	50.7847	-6.75712	FALSE
OG0000299	-29.6398	65.2797	-29.5335	71.067	-5.78739	FALSE
OG0000300	-23.9015	53.8029	-23.8647	59.7295	-5.92653	FALSE
OG0000301	-18.2627	42.5254	-17.9203	47.8405	-5.31511	FALSE
OG0000302	-28.2433	62.4865	-32.0089	76.0179	-13.5313	FALSE
OG0000303	-19.6833	45.3666	-19.5601	51.1201	-5.75357	FALSE
OG0000304	-12.196	30.392	-9.26922	30.5384	-0.146454	FALSE
OG0000305	-19.6246	45.2491	-19.2951	50.5903	-5.34111	FALSE
OG0000306	-13.8311	33.6621	-14.1963	40.3926	-6.7305	FALSE
OG0000307	-18.0954	42.1907	-17.6852	47.3704	-5.1797	FALSE
OG0000308	-19.3363	44.6725	-19.213	50.426	-5.75348	FALSE
OG0000309	-14.4634	34.9268	-14.688	41.3761	-6.44924	FALSE
OG0000310	-20.3679	46.7358	-20.1157	52.2314	-5.49567	FALSE
OG0000311	-24.3405	54.681	-23.4786	58.9572	-4.27623	FALSE
OG0000312	-15.7377	37.4755	-15.6516	43.3031	-5.82764	FALSE
OG0000314	-19.9848	45.9697	-17.095	46.1899	-0.220252	FALSE
OG0000315	-24.9301	55.8603	-24.1197	60.2394	-4.37913	FALSE
OG0000316	-12.265	30.5299	-13.5071	39.0143	-8.48434	FALSE
OG0000317	-13.0694	32.1388	-14.8213	41.6426	-9.50382	FALSE
OG0000318	-20.2795	46.559	-20.2822	52.5644	-6.00542	FALSE
OG0000319	-3.41711	12.8342	-5.13711	22.2742	-9.44	FALSE
OG0000320	-15.7736	37.5471	-11.975	35.95	1.59713	FALSE
OG0000321	-21.7867	49.5733	-22.1202	56.2404	-6.6671	FALSE
OG0000322	-24.5482	55.0965	-23.4662	58.9324	-3.83592	FALSE
OG0000323	-23.1256	52.2511	-22.7358	57.4715	-5.22039	FALSE
OG0000324	-29.1797	64.3595	-28.1352	68.2704	-3.9109	FALSE
OG0000325	-26.2751	58.5501	-27.1416	66.2833	-7.73317	FALSE
OG0000326	-17.0717	40.1434	-18.2948	48.5897	-8.44625	FALSE
OG0000327	-16.5917	39.1833	-16.2998	44.5995	-5.41619	FALSE
OG0000328	-11.0744	28.1489	-10.3381	32.6762	-4.52736	FALSE
OG0000329	-22.2527	50.5054	-22.2981	56.5962	-6.0908	FALSE
OG0000330	-15.7785	37.557	-14.8361	41.6722	-4.11517	FALSE
OG0000332	-19.7851	45.5702	-19.2973	50.5947	-5.02447	FALSE
OG0000333	-22.8334	51.6667	-26.4635	64.927	-13.2603	FALSE
OG0000334	-21.0156	48.0312	-21.738	55.4761	-7.44486	FALSE
OG0000335	-9.17304	24.3461	-9.60597	31.2119	-6.86587	FALSE
OG0000336	-19.5432	45.0865	-19.6106	51.2212	-6.13467	FALSE
OG0000337	-26.6028	59.2057	-30.8461	73.6922	-14.4865	FALSE
OG0000338	-18.5882	43.1765	-19.5318	51.0636	-7.88719	FALSE
OG0000339	-16.413	38.826	-14.7651	41.5302	-2.7042	FALSE
OG0000340	-21.9003	49.8005	-21.6877	55.3755	-5.57493	FALSE
OG0000341	-18.2352	42.4704	-18.2875	48.575	-6.1046	FALSE
OG0000342	-12.1416	30.2832	-12.3948	36.7896	-6.50633	FALSE
OG0000343	-23.1655	52.3309	-22.7656	57.5312	-5.20028	FALSE
OG0000344	-15.6425	37.285	-15.3499	42.6998	-5.41482	FALSE
OG0000345	-12.2961	30.5923	-12.2031	36.4062	-5.8139	FALSE
OG0000346	-10.3837	26.7675	-10.4462	32.8924	-6.12491	FALSE
OG0000347	-25.7619	57.5238	-25.1848	62.3696	-4.84576	FALSE
OG0000348	-4.96784	15.9357	-7.52808	27.0562	-11.1205	FALSE
OG0000349	-18.6453	43.2906	-18.7318	49.4635	-6.17296	FALSE
OG0000351	-12.3224	30.6449	-11.8321	35.6642	-5.01936	FALSE
OG0000352	-23.1619	52.3238	-23.3988	58.7976	-6.47378	FALSE
OG0000353	-33.8558	73.7115	-34.2316	80.4631	-6.75159	FALSE
OG0000354	-14.0307	34.0614	-12.4455	36.891	-2.82966	FALSE
OG0000355	-9.411	24.822	-9.57012	31.1402	-6.31823	FALSE
OG0000356	-18.3373	42.6746	-17.5123	47.0245	-4.34988	FALSE
OG0000357	-11.4354	28.8708	-10.9355	33.871	-5.0002	FALSE
OG0000358	-19.3491	44.6983	-19.3329	50.6658	-5.96753	FALSE
OG0000359	-30.2495	66.499	-30.0013	72.0025	-5.50358	FALSE
OG0000360	-16.1746	38.3492	-16.1887	44.3775	-6.02822	FALSE
OG0000361	-28.1136	62.2272	-28.9296	69.8592	-7.63205	FALSE
OG0000362	-21.514	49.028	-23.8556	59.7112	-10.6831	FALSE
OG0000363	-21.6638	49.3275	-21.9157	55.8314	-6.50387	FALSE
OG0000364	-8.92963	23.8593	-8.74376	29.4875	-5.62826	FALSE
OG0000365	-22.1835	50.3669	-22.2198	56.4397	-6.07279	FALSE
OG0000367	-19.726	45.4521	-19.0254	50.0508	-4.59871	FALSE
OG0000368	-12.6796	31.3593	-12.1288	36.2577	-4.89841	FALSE
OG0000369	-25.713	57.4259	-28.2017	68.4035	-10.9775	FALSE
OG0000370	-19.0958	44.1916	-18.5057	49.0114	-4.81978	FALSE
OG0000371	-11.2102	28.4204	-11.8111	35.6221	-7.20171	FALSE
OG0000372	-30.6881	67.3761	-35.9765	83.9529	-16.5768	FALSE
OG0000373	-24.8297	55.6594	-25.1232	62.2465	-6.58705	FALSE
OG0000374	-14.1397	34.2795	-13.8727	39.7454	-5.46593	FALSE
OG0000375	-4.96784	15.9357	-7.52808	27.0562	-11.1205	FALSE
OG0000376	-11.0042	28.0085	-10.5738	33.1477	-5.13921	FALSE
OG0000377	-13.4678	32.9356	-13.1985	38.397	-5.46139	FALSE
OG0000378	-8.26866	22.5373	-7.44395	26.8879	-4.35057	FALSE
OG0000379	-20.5686	47.1372	-21.5682	55.1365	-7.99923	FALSE
OG0000380	-19.4203	44.8407	-18.7208	49.4415	-4.60088	FALSE
OG0000381	-27.0047	60.0095	-32.5112	77.0224	-17.0129	FALSE
OG0000382	-28.7427	63.4854	-35.9038	83.8077	-20.3223	FALSE
OG0000383	-23.8794	53.7588	-27.8849	67.7698	-14.011	FALSE
OG0000384	-22.7273	51.4546	-22.3711	56.7422	-5.28759	FALSE
OG0000385	-15.0734	36.1469	-13.9864	39.9729	-3.82601	FALSE
OG0000386	-23.2189	52.4377	-22.4213	56.8426	-4.40483	FALSE
OG0000387	-7.56857	21.1371	-5.97303	23.9461	-2.80891	FALSE
OG0000388	-17.4377	40.8753	-17.712	47.424	-6.54871	FALSE
OG0000389	-19.0778	44.1556	-19.077	50.154	-5.99841	FALSE
OG0000390	-9.87243	25.7449	-13.1622	38.3243	-12.5795	FALSE
OG0000391	-21.7574	49.5149	-19.0727	50.1453	-0.63045	FALSE
OG0000392	-10.4641	26.9281	-9.7149	31.4298	-4.50167	FALSE
OG0000393	-21.6455	49.291	-20.8719	53.7437	-4.45266	FALSE
OG0000394	-4.96784	15.9357	-7.52808	27.0562	-11.1205	FALSE
OG0000395	-31.7496	69.4993	-31.7263	75.4526	-5.95335	FALSE
OG0000396	-19.1341	44.2682	-18.7495	49.4989	-5.23067	FALSE
OG0000397	-8.19715	22.3943	-11.1289	34.2579	-11.8636	FALSE
OG0000398	-28.0598	62.1195	-29.5768	71.1537	-9.03414	FALSE
OG0000399	-27.8074	61.6147	-29.9724	71.9447	-10.33	FALSE
OG0000400	-19.5356	45.0712	-19.336	50.6721	-5.60084	FALSE
OG0000401	-20.5916	47.1832	-20.1259	52.2518	-5.06863	FALSE
OG0000402	-6.69232	19.3846	-7.61971	27.2394	-7.85479	FALSE
OG0000403	-18.4548	42.9096	-18.1494	48.2989	-5.38927	FALSE
OG0000404	-24.7139	55.4278	-23.7356	59.4713	-4.0435	FALSE
OG0000405	-19.3724	44.7447	-19.3823	50.7646	-6.01981	FALSE
OG0000406	-14.3644	34.7288	-13.7377	39.4755	-4.74669	FALSE
OG0000407	-4.96784	15.9357	-9.14201	30.284	-14.3483	FALSE
OG0000408	-21.6064	49.2129	-22.2563	56.5126	-7.29976	FALSE
OG0000409	-22.1061	50.2123	-21.9783	55.9566	-5.74432	FALSE
OG0000410	-18.3014	42.6029	-19.6505	51.301	-8.69811	FALSE
OG0000411	-20.9185	47.837	-20.7454	53.4908	-5.65373	FALSE
OG0000412	-18.7483	43.4965	-18.5915	49.1829	-5.68639	FALSE
OG0000413	-26.7238	59.4477	-29.3019	70.6039	-11.1562	FALSE
OG0000414	-28.6705	63.3411	-29.0813	70.1625	-6.82144	FALSE
OG0000415	-16.2895	38.579	-16.0898	44.1796	-5.60063	FALSE
OG0000416	-16.1229	38.2457	-15.8002	43.6004	-5.35463	FALSE
OG0000417	-21.3733	48.7466	-21.3206	54.6412	-5.89462	FALSE
OG0000418	-17.8693	41.7386	-17.5845	47.169	-5.43044	FALSE
OG0000419	-17.9152	41.8303	-17.5754	47.1509	-5.32057	FALSE
OG0000420	-23.4764	52.9528	-24.4649	60.9298	-7.97699	FALSE
OG0000421	-14.8087	35.6173	-14.7739	41.5479	-5.93056	FALSE
OG0000422	-26.2419	58.4839	-25.5824	63.1648	-4.68094	FALSE
OG0000423	-18.2379	42.4757	-17.9594	47.9187	-5.44302	FALSE
OG0000424	-23.2666	52.5331	-22.5637	57.1274	-4.59426	FALSE
OG0000425	-15.2151	36.4302	-14.8145	41.6289	-5.19867	FALSE
OG0000427	-8.62749	23.255	-8.41289	28.8258	-5.57081	FALSE
OG0000428	-19.04	44.0801	-18.359	48.7179	-4.63784	FALSE
OG0000429	-23.5734	53.1468	-26.5843	65.1687	-12.0219	FALSE
OG0000430	-11.2716	28.5431	-11.53	35.0599	-6.51677	FALSE
OG0000431	-16.7554	39.5108	-17.1987	46.3974	-6.88658	FALSE
OG0000432	-12.7188	31.4376	-12.987	37.974	-6.53645	FALSE
OG0000433	-7.03773	20.0755	-7.73526	27.4705	-7.39507	FALSE
OG0000434	-15.8074	37.6148	-15.5676	43.1352	-5.5204	FALSE
OG0000435	-24.6201	55.2401	-25.1781	62.3561	-7.11601	FALSE
OG0000436	-19.368	44.736	-19.4603	50.9206	-6.18464	FALSE
OG0000437	-12.2566	30.5132	-9.99988	31.9998	-1.4866	FALSE
OG0000438	-23.429	52.858	-22.9071	57.8143	-4.95631	FALSE
OG0000439	-21.7398	49.4796	-22.3305	56.661	-7.18142	FALSE
OG0000440	-13.4723	32.9446	-13.1204	38.2408	-5.29624	FALSE
OG0000441	-20.1476	46.2951	-20.263	52.5261	-6.23094	FALSE
OG0000442	-23.39	52.7801	-22.4121	56.8242	-4.04414	FALSE
OG0000443	-14.4911	34.9821	-14.2961	40.5922	-5.61006	FALSE
OG0000444	-19.3466	44.6932	-21.3197	54.6394	-9.94621	FALSE
OG0000445	-23.1899	52.3798	-23.0867	58.1733	-5.79358	FALSE
OG0000446	-11.0282	28.0564	-10.4375	32.8749	-4.81854	FALSE
OG0000447	-23.5188	53.0376	-22.5252	57.0504	-4.01284	FALSE
OG0000448	-14.1242	34.2483	-14.2034	40.4067	-6.15837	FALSE
OG0000449	-15.8768	37.7535	-16.319	44.638	-6.88445	FALSE
OG0000450	-20.2294	46.4588	-19.896	51.792	-5.33326	FALSE
OG0000451	-22.352	50.7039	-22.9509	57.9018	-7.19785	FALSE
OG0000452	-8.92963	23.8593	-9.28117	30.5623	-6.70307	FALSE
OG0000453	-21.4327	48.8654	-24.4987	60.9975	-12.1321	FALSE
OG0000454	-24.9602	55.9204	-26.6125	65.225	-9.30459	FALSE
OG0000455	-16.0481	38.0962	-15.4218	42.8436	-4.74741	FALSE
OG0000456	-25.2208	56.4416	-30.4547	72.9095	-16.4678	FALSE
OG0000457	-4.69856	15.3971	-3.81581	19.6316	-4.2345	FALSE
OG0000458	-24.5828	55.1656	-28.1028	68.2056	-13.04	FALSE
OG0000459	-17.4332	40.8665	-17.1213	46.2426	-5.37611	FALSE
OG0000460	-15.4285	36.8571	-14.8592	41.7184	-4.86129	FALSE
OG0000461	-7.96362	21.9272	-8.03235	28.0647	-6.13747	FALSE
OG0000462	-15.5088	37.0175	-15.9333	43.8666	-6.84903	FALSE
OG0000463	-14.9362	35.8724	-13.0834	38.1669	-2.29443	FALSE
OG0000464	-17.561	41.1221	-17.1665	46.3329	-5.21089	FALSE
OG0000465	-21.5562	49.1124	-20.3941	52.7881	-3.6757	FALSE
OG0000466	-23.667	53.3341	-22.8043	57.6086	-4.27447	FALSE
OG0000467	-4.69856	15.3971	-3.81581	19.6316	-4.2345	FALSE
OG0000468	-21.6649	49.3298	-21.0162	54.0324	-4.70269	FALSE
OG0000469	-32.4669	70.9337	-37.5125	87.025	-16.0913	FALSE
OG0000470	-12.4322	30.8644	-14.744	41.488	-10.6236	FALSE
OG0000471	-20.3839	46.7678	-20.3129	52.6257	-5.85788	FALSE
OG0000472	-4.69856	15.3971	-3.81581	19.6316	-4.2345	FALSE
OG0000473	-22.4965	50.993	-21.8016	55.6031	-4.61013	FALSE
OG0000474	-14.4281	34.8563	-14.1321	40.2643	-5.408	FALSE
OG0000475	-17.2481	40.4962	-17.3052	46.6103	-6.11412	FALSE
OG0000476	-9.75096	25.5019	-10.8564	33.7128	-8.21089	FALSE
OG0000477	-13.572	33.144	-13.215	38.4301	-5.28611	FALSE
OG0000478	-19.6425	45.2849	-19.7225	51.445	-6.16008	FALSE
OG0000479	-21.3001	48.6001	-22.6835	57.3671	-8.76693	FALSE
OG0000480	-15.2224	36.4447	-14.9509	41.9017	-5.457	FALSE
OG0000481	-21.0556	48.1111	-20.3614	52.7228	-4.61164	FALSE
OG0000482	-19.2472	44.4944	-20.1432	52.2864	-7.79198	FALSE
OG0000483	-16.1635	38.327	-16.0505	44.101	-5.77403	FALSE
OG0000484	-26.1509	58.3018	-26.8244	65.6487	-7.34692	FALSE
OG0000485	-34.6037	75.2073	-32.3689	76.7378	-1.5305	FALSE
OG0000486	-19.3315	44.6631	-18.4226	48.8451	-4.18203	FALSE
OG0000487	-2.39343	10.7869	-2.99117	17.9823	-7.19549	FALSE
OG0000489	-18.1618	42.3237	-17.309	46.618	-4.29431	FALSE
OG0000490	-18.2501	42.5003	-17.9534	47.9068	-5.40651	FALSE
OG0000491	-5.86171	17.7234	-7.22029	26.4406	-8.71717	FALSE
OG0000492	-7.09759	20.1952	-7.65375	27.3075	-7.11233	FALSE
OG0000493	-14.4182	34.8365	-14.0395	40.079	-5.24251	FALSE
OG0000494	-31.0606	68.1213	-29.584	71.1679	-3.04668	FALSE
OG0000495	-18.5718	43.1436	-18.0095	48.019	-4.87541	FALSE
OG0000496	-23.4936	52.9871	-24.4741	60.9481	-7.961	FALSE
OG0000497	-24.1863	54.3727	-27.9865	67.9731	-13.6004	FALSE
OG0000498	-27.6548	61.3096	-28.5913	69.1827	-7.87302	FALSE
OG0000499	-16.7591	39.5181	-15.9243	43.8486	-4.33046	FALSE
OG0000500	-4.69856	15.3971	-3.81581	19.6316	-4.2345	FALSE
OG0000501	-17.221	40.4419	-16.8635	45.727	-5.28509	FALSE
OG0000502	-10.0042	26.0084	-10.4961	32.9922	-6.98385	FALSE
OG0000503	-23.7104	53.4209	-22.3387	56.6773	-3.25645	FALSE
OG0000504	-19.8211	45.6421	-19.618	51.2359	-5.5938	FALSE
OG0000505	-23.8307	53.6615	-23.6702	59.3405	-5.679	FALSE
OG0000506	-4.5624	15.1248	-4.74948	21.499	-6.37416	FALSE
OG0000507	-24.8584	55.7169	-25.1192	62.2383	-6.52145	FALSE
OG0000508	-18.27	42.54	-18.8356	49.6713	-7.13127	FALSE
OG0000509	-23.9213	53.8426	-23.1306	58.2612	-4.41865	FALSE
OG0000510	-6.79478	19.5896	-7.75801	27.516	-7.92644	FALSE
OG0000511	-23.0656	52.1312	-24.6699	61.3398	-9.20866	FALSE
OG0000512	-19.7264	45.4527	-18.8997	49.7994	-4.34667	FALSE
OG0000513	-16.0783	38.1565	-16.3438	44.6876	-6.53105	FALSE
OG0000514	-17.8561	41.7121	-15.942	43.8839	-2.17178	FALSE
OG0000515	-21.1594	48.3187	-21.8637	55.7274	-7.40866	FALSE
OG0000516	-12.0864	30.1727	-13.1705	38.3411	-8.16832	FALSE
OG0000517	-4.89846	15.7969	-6.39952	24.799	-9.00211	FALSE
OG0000518	-15.4355	36.8709	-15.3885	42.7769	-5.90604	FALSE
OG0000519	-10.7418	27.4836	-10.6968	33.3937	-5.9101	FALSE
OG0000520	-21.5566	49.1132	-21.173	54.346	-5.23275	FALSE
OG0000521	-18.3931	42.7861	-17.9642	47.9284	-5.14226	FALSE
OG0000522	-5.07913	16.1583	-6.0798	24.1596	-8.00134	FALSE
OG0000523	-24.0901	54.1802	-24.6814	61.3629	-7.1827	FALSE
OG0000524	-24.9482	55.8964	-23.9383	59.8765	-3.98006	FALSE
OG0000525	-14.7689	35.5377	-14.7867	41.5734	-6.03569	FALSE
OG0000526	-24.6308	55.2617	-25.213	62.426	-7.16426	FALSE
OG0000527	-4.69856	15.3971	-3.81581	19.6316	-4.2345	FALSE
OG0000528	-13.1526	32.3052	-13.4592	38.9184	-6.61319	FALSE
OG0000529	-14.5819	35.1639	-14.8247	41.6494	-6.48554	FALSE
OG0000530	-22.2997	50.5994	-21.318	54.636	-4.03655	FALSE
OG0000531	-16.3822	38.7644	-15.5479	43.0959	-4.33146	FALSE
OG0000532	-25.7354	57.4708	-27.863	67.726	-10.2552	FALSE
OG0000533	-16.4499	38.8998	-16.0232	44.0464	-5.14663	FALSE
OG0000534	-32.3487	70.6974	-32.2362	76.4725	-5.77508	FALSE
OG0000535	-30.2617	66.5234	-33.4216	78.8432	-12.3198	FALSE
OG0000536	-16.4339	38.8678	-16.3984	44.7968	-5.92893	FALSE
OG0000537	-20.4981	46.9962	-20.4295	52.8589	-5.86267	FALSE
OG0000538	-22.5152	51.0305	-21.1267	54.2535	-3.22301	FALSE
OG0000539	-14.4286	34.8571	-13.7533	39.5065	-4.6494	FALSE
OG0000540	-12.3994	30.7987	-12.6855	37.3709	-6.57219	FALSE
OG0000541	-30.1457	66.2914	-31.6513	75.3027	-9.01126	FALSE
OG0000542	-17.7703	41.5405	-17.8351	47.6702	-6.12961	FALSE
OG0000543	-15.9995	37.999	-16.3658	44.7316	-6.73257	FALSE
OG0000544	-26.4414	58.8827	-33.9149	79.8298	-20.947	FALSE
OG0000545	-26.9309	59.8618	-29.9894	71.9789	-12.1171	FALSE
OG0000546	-20.8023	47.6046	-19.1619	50.3238	-2.71922	FALSE
OG0000547	-13.7951	33.5902	-13.5055	39.011	-5.42082	FALSE
OG0000548	-12.9959	31.9917	-13.0281	38.0563	-6.06456	FALSE
OG0000549	-26.3819	58.7639	-27.8282	67.6564	-8.89251	FALSE
OG0000550	-18.8475	43.6951	-18.798	49.596	-5.90092	FALSE
OG0000551	-13.6741	33.3482	-14.1002	40.2005	-6.8523	FALSE
OG0000552	-36.0231	78.0461	-54.0753	120.151	-42.1045	FALSE
OG0000553	-14.1858	34.3716	-14.3431	40.6862	-6.31469	FALSE
OG0000554	-24.9658	55.9315	-24.4568	60.9137	-4.98215	FALSE
OG0000555	-4.96784	15.9357	-7.52808	27.0562	-11.1205	FALSE
OG0000556	-21.1217	48.2434	-21.0844	54.1687	-5.92531	FALSE
OG0000557	-7.33187	20.6637	-7.55046	27.1009	-6.43719	FALSE
OG0000558	-22.8028	51.6056	-22.4254	56.8508	-5.24522	FALSE
OG0000559	-13.5164	33.0327	-13.3816	38.7631	-5.7304	FALSE
OG0000560	-15.4371	36.8742	-15.0568	42.1136	-5.23943	FALSE
OG0000561	-18.7805	43.561	-18.7274	49.4549	-5.89391	FALSE
OG0000562	-14.4971	34.9942	-14.6024	41.2047	-6.21049	FALSE
OG0000563	-26.5868	59.1736	-25.8583	63.7166	-4.54294	FALSE
OG0000564	-23.925	53.8499	-23.8101	59.6201	-5.77018	FALSE
OG0000565	-25.1099	56.2199	-30.442	72.884	-16.6642	FALSE
OG0000566	-15.166	36.332	-15.121	42.2419	-5.90988	FALSE
OG0000567	-14.1301	34.2603	-13.8836	39.7673	-5.50701	FALSE
OG0000568	-14.9432	35.8865	-14.8505	41.701	-5.81456	FALSE
OG0000569	-18.6469	43.2937	-18.8001	49.6001	-6.30639	FALSE
OG0000570	-17.1092	40.2184	-18.2546	48.5091	-8.29069	FALSE
OG0000571	-34.0563	74.1126	-36.1588	84.3176	-10.205	FALSE
OG0000572	-16.8232	39.6465	-15.8707	43.7414	-4.09493	FALSE
OG0000573	-9.18568	24.3714	-9.71974	31.4395	-7.06812	FALSE
OG0000574	-6.84518	19.6904	-7.81733	27.6347	-7.94431	FALSE
OG0000575	-9.38056	24.7611	-9.25917	30.5183	-5.75722	FALSE
OG0000576	-18.9143	43.8286	-18.9911	49.9822	-6.15361	FALSE
OG0000577	-9.49568	24.9914	-9.90297	31.8059	-6.81458	FALSE
OG0000578	-8.72526	23.4505	-9.10077	30.2015	-6.75102	FALSE
OG0000580	-13.5038	33.0076	-13.2835	38.567	-5.5594	FALSE
OG0000581	-14.4336	34.8671	-15.5446	43.0891	-8.222	FALSE
OG0000582	-2.39343	10.7869	-2.99117	17.9823	-7.19549	FALSE
OG0000583	-21.5853	49.1706	-21.6316	55.2632	-6.09261	FALSE
OG0000584	-25.8619	57.7238	-33.2315	78.463	-20.7392	FALSE
OG0000585	-28.6836	63.3672	-28.0628	68.1256	-4.75838	FALSE
OG0000586	-14.3624	34.7248	-14.019	40.0381	-5.31324	FALSE
OG0000587	-9.89119	25.7824	-10.7465	33.4929	-7.71052	FALSE
OG0000588	-20.4474	46.8948	-19.8408	51.6816	-4.78683	FALSE
OG0000589	-18.8802	43.7604	-18.881	49.762	-6.00156	FALSE
OG0000590	-25.0993	56.1985	-24.6709	61.3417	-5.14319	FALSE
OG0000591	-7.37306	20.7461	-7.82575	27.6515	-6.90538	FALSE
OG0000592	-6.39022	18.7804	-7.32259	26.6452	-7.86474	FALSE
OG0000593	-23.3418	52.6836	-23.8296	59.6592	-6.97557	FALSE
OG0000594	-19.9271	45.8541	-20.0246	52.0491	-6.19498	FALSE
OG0000595	-22.3372	50.6743	-22.062	56.1239	-5.44958	FALSE
OG0000596	-24.8703	55.7407	-24.7124	61.4249	-5.68418	FALSE
OG0000597	-4.69856	15.3971	-3.81581	19.6316	-4.2345	FALSE
OG0000598	-10.9716	27.9432	-11.2569	34.5139	-6.57069	FALSE
OG0000599	-11.0541	28.1082	-11.4186	34.8371	-6.72897	FALSE
OG0000600	-21.9884	49.9768	-22.1974	56.3948	-6.41797	FALSE
OG0000601	-19.6814	45.3627	-20.3158	52.6317	-7.26896	FALSE
OG0000602	-18.1882	42.3763	-18.0347	48.0694	-5.69312	FALSE
OG0000603	-23.2853	52.5707	-21.9263	55.8527	-3.28204	FALSE
OG0000604	-14.7989	35.5979	-14.9551	41.9102	-6.31227	FALSE
OG0000605	-16.4889	38.9778	-15.4269	42.8538	-3.87596	FALSE
OG0000606	-19.3508	44.7016	-22.3982	56.7963	-12.0947	FALSE
OG0000607	-11.5081	29.0162	-11.2835	34.567	-5.55084	FALSE
OG0000608	-4.69856	15.3971	-3.81581	19.6316	-4.2345	FALSE
OG0000609	-6.90712	19.8142	-7.66966	27.3393	-7.52508	FALSE
OG0000610	-18.2076	42.4152	-17.7688	47.5376	-5.12235	FALSE
OG0000611	-24.2728	54.5456	-23.4228	58.8456	-4.29996	FALSE
OG0000612	-21.4425	48.8849	-20.6963	53.3926	-4.50765	FALSE
OG0000613	-23.7633	53.5265	-23.3318	58.6636	-5.13713	FALSE
OG0000614	-11.6993	29.3986	-11.7886	35.5771	-6.17853	FALSE
OG0000615	-10.5439	27.0877	-9.5233	31.0466	-3.95888	FALSE
OG0000616	-37.8839	81.7678	-49.5239	111.048	-29.2801	FALSE
OG0000617	-20.2654	46.5309	-19.8528	51.7057	-5.17481	FALSE
OG0000618	-24.7544	55.5089	-24.9666	61.9332	-6.4243	FALSE
OG0000619	-20.3159	46.6318	-19.5864	51.1728	-4.54093	FALSE
OG0000620	-4.69856	15.3971	-3.81581	19.6316	-4.2345	FALSE
OG0000621	-25.9813	57.9626	-25.821	63.6419	-5.67933	FALSE
OG0000622	-32.7253	71.4507	-42.4255	96.8509	-25.4002	FALSE
OG0000623	-4.69856	15.3971	-3.81581	19.6316	-4.2345	FALSE
OG0000624	-17.7874	41.5747	-17.6476	47.2952	-5.72051	FALSE
OG0000625	-17.6807	41.3615	-16.8946	45.7891	-4.42765	FALSE
OG0000626	-16.1184	38.2368	-16.1404	44.2809	-6.04406	FALSE
OG0000627	-7.43886	20.8777	-8.46198	28.924	-8.04623	FALSE
OG0000628	-7.05903	20.1181	-8.38635	28.7727	-8.65464	FALSE
OG0000629	-19.3056	44.6113	-21.8652	55.7304	-11.1192	FALSE
OG0000630	-7.33187	20.6637	-7.55046	27.1009	-6.43719	FALSE
OG0000631	-14.1309	34.2617	-13.9096	39.8192	-5.55753	FALSE
OG0000632	-8.65549	23.311	-11.0992	34.1984	-10.8874	FALSE
OG0000633	-9.15338	24.3068	-9.40329	30.8066	-6.49983	FALSE
OG0000634	-18.8194	43.6388	-18.5341	49.0681	-5.42927	FALSE
OG0000635	-11.6121	29.2242	-11.7185	35.437	-6.21274	FALSE
OG0000636	-19.0293	44.0587	-18.9196	49.8392	-5.7805	FALSE
OG0000637	-6.90712	19.8142	-7.66966	27.3393	-7.52508	FALSE
OG0000638	-19.6729	45.3457	-19.4635	50.9269	-5.5812	FALSE
OG0000639	-17.8311	41.6621	-16.6775	45.355	-3.69285	FALSE
OG0000640	-8.40636	22.8127	-8.6197	29.2394	-6.42668	FALSE
OG0000641	-17.4216	40.8432	-16.5216	45.0432	-4.20004	FALSE
OG0000642	-30.7988	67.5976	-30.4171	72.8343	-5.23667	FALSE
OG0000643	-22.3332	50.6665	-22.4705	56.9409	-6.27447	FALSE
OG0000644	-4.69856	15.3971	-3.81581	19.6316	-4.2345	FALSE
OG0000645	-4.96784	15.9357	-7.52808	27.0562	-11.1205	FALSE
OG0000646	-4.69856	15.3971	-3.81581	19.6316	-4.2345	FALSE
OG0000647	-4.69856	15.3971	-3.81581	19.6316	-4.2345	FALSE
OG0000648	-6.1971	18.3942	-5.11275	22.2255	-3.83129	FALSE
OG0000649	-24.1853	54.3706	-23.9869	59.9737	-5.60315	FALSE
OG0000650	-23.3217	52.6433	-23.6762	59.3524	-6.70908	FALSE
OG0000651	-23.7293	53.4586	-24.8763	61.7527	-8.2941	FALSE
OG0000652	-19.7908	45.5817	-19.1723	50.3447	-4.76297	FALSE
OG0000653	-13.1392	32.2784	-12.6852	37.3703	-5.09194	FALSE
OG0000654	-12.7026	31.4052	-12.3499	36.6998	-5.29459	FALSE
OG0000655	-9.12048	24.241	-8.92694	29.8539	-5.61291	FALSE
OG0000656	-26.1987	58.3975	-27.8141	67.6282	-9.23073	FALSE
OG0000657	-26.3253	58.6505	-30.3678	72.7355	-14.085	FALSE
OG0000658	-20.8562	47.7124	-21.3634	54.7269	-7.01441	FALSE
OG0000659	-13.7765	33.553	-13.9391	39.8783	-6.32526	FALSE
OG0000660	-4.69856	15.3971	-3.81581	19.6316	-4.2345	FALSE
OG0000661	-18.4148	42.8296	-17.0305	46.0609	-3.23134	FALSE
OG0000662	-12.445	30.8901	-11.8041	35.6083	-4.71819	FALSE
OG0000663	-10.9604	27.9207	-11.2073	34.4146	-6.49387	FALSE
OG0000664	-18.4938	42.9877	-19.4526	50.9052	-7.91754	FALSE
OG0000665	-23.4928	52.9857	-23.2366	58.4731	-5.48745	FALSE
OG0000666	-22.8403	51.6806	-22.5741	57.1482	-5.46767	FALSE
OG0000667	-4.70602	15.412	-6.09378	24.1876	-8.77552	FALSE
OG0000668	-17.9123	41.8246	-16.6047	45.2093	-3.38475	FALSE
OG0000669	-17.0667	40.1335	-17.0016	46.0031	-5.86962	FALSE
OG0000670	-12.3335	30.667	-12.0965	36.193	-5.52608	FALSE
OG0000671	-19.4391	44.8781	-18.9725	49.945	-5.0669	FALSE
OG0000672	-22.3955	50.791	-22.6886	57.3772	-6.58624	FALSE
OG0000674	-16.4336	38.8673	-16.5135	45.0269	-6.15967	FALSE
OG0000675	-21.5403	49.0806	-24.1048	60.2095	-11.1289	FALSE
OG0000676	-21.7758	49.5515	-20.774	53.5481	-3.99656	FALSE
OG0000677	-11.3816	28.7632	-11.8665	35.7329	-6.96971	FALSE
OG0000678	-12.962	31.9241	-13.0405	38.081	-6.15692	FALSE
OG0000679	-20.3166	46.6332	-21.9726	55.9452	-9.31207	FALSE
OG0000680	-8.95602	23.912	-9.42289	30.8458	-6.93375	FALSE
OG0000681	-9.07003	24.1401	-12.7294	37.4588	-13.3188	FALSE
OG0000682	-7.15052	20.301	-6.74971	25.4994	-5.19838	FALSE
OG0000683	-23.4708	52.9416	-22.814	57.6279	-4.68635	FALSE
OG0000684	-22.1492	50.2983	-23.0553	58.1106	-7.81227	FALSE
OG0000685	-20.9288	47.8576	-20.4807	52.9613	-5.10373	FALSE
OG0000686	-12.2497	30.4994	-12.1441	36.2881	-5.78875	FALSE
OG0000687	-22.8336	51.6672	-23.8028	59.6056	-7.9384	FALSE
OG0000688	-10.7724	27.5448	-10.5554	33.1108	-5.56601	FALSE
OG0000689	-10.9761	27.9523	-11.7721	35.5441	-7.59185	FALSE
OG0000690	-15.7581	37.5162	-14.1798	40.3595	-2.84336	FALSE
OG0000691	-13.2132	32.4264	-13.3912	38.7825	-6.35605	FALSE
OG0000692	-20.3695	46.7389	-17.8134	47.6269	-0.887946	FALSE
OG0000693	-19.1726	44.3451	-19.124	50.2479	-5.90282	FALSE
OG0000694	-4.35466	14.7093	-4.96012	21.9202	-7.21091	FALSE
OG0000695	-17.9145	41.8291	-18.0468	48.0935	-6.26444	FALSE
OG0000696	-17.3351	40.6703	-16.3417	44.6833	-4.01306	FALSE
OG0000697	-6.1971	18.3942	-5.11275	22.2255	-3.83129	FALSE
OG0000699	-23.6945	53.389	-24.0725	60.1449	-6.75588	FALSE
OG0000700	-9.56647	25.1329	-9.82707	31.6541	-6.52121	FALSE
OG0000701	-20.1214	46.2429	-20.169	52.338	-6.09516	FALSE
OG0000702	-12.9278	31.8555	-13.4151	38.8303	-6.97475	FALSE
OG0000703	-22.638	51.276	-22.2838	56.5676	-5.29162	FALSE
OG0000704	-18.1212	42.2425	-17.5746	47.1492	-4.90676	FALSE
OG0000705	-11.5563	29.1127	-11.351	34.7019	-5.58926	FALSE
OG0000706	-19.7847	45.5695	-19.7874	51.5749	-6.00542	FALSE
OG0000707	-14.8198	35.6396	-14.5075	41.015	-5.37548	FALSE
OG0000708	-16.8702	39.7405	-16.5312	45.0623	-5.32186	FALSE
OG0000709	-6.3857	18.7714	-6.85579	25.7116	-6.94018	FALSE
OG0000710	-10.6667	27.3334	-11.7189	35.4378	-8.10442	FALSE
OG0000711	-25.9467	57.8933	-26.6615	65.323	-7.42965	FALSE
OG0000712	-19.9931	45.9862	-20.6285	53.2569	-7.27076	FALSE
OG0000713	-5.60746	17.2149	-7.14611	26.2922	-9.07732	FALSE
OG0000714	-20.3605	46.7211	-21.3535	54.7069	-7.98584	FALSE
OG0000715	-19.9616	45.9233	-19.7931	51.5862	-5.66293	FALSE
OG0000716	-19.9375	45.875	-19.5639	51.1278	-5.25273	FALSE
OG0000717	-10.4876	26.9751	-10.9209	33.8418	-6.86667	FALSE
OG0000718	-24.7639	55.5278	-24.9793	61.9587	-6.43083	FALSE
OG0000719	-21.3081	48.6162	-22.5315	57.063	-8.44678	FALSE
OG0000720	-9.74211	25.4842	-9.817	31.634	-6.14979	FALSE
OG0000721	-26.0483	58.0965	-26.0581	64.1162	-6.01966	FALSE
OG0000722	-11.2856	28.5712	-11.1349	34.2697	-5.69855	FALSE
OG0000723	-4.69856	15.3971	-3.81581	19.6316	-4.2345	FALSE
OG0000724	-21.3	48.6	-23.5911	59.1821	-10.5821	FALSE
OG0000725	-24.9885	55.977	-25.8965	63.793	-7.81603	FALSE
OG0000726	-6.89308	19.7862	-7.3534	26.7068	-6.92065	FALSE
OG0000727	-15.9281	37.8561	-16.6831	45.3662	-7.51007	FALSE
OG0000728	-12.3963	30.7926	-11.4106	34.8212	-4.02863	FALSE
OG0000729	-17.4933	40.9866	-17.7102	47.4205	-6.43392	FALSE
OG0000730	-15.2637	36.5273	-15.1143	42.2285	-5.7012	FALSE
OG0000731	-16.3419	38.6837	-16.7429	45.4858	-6.80202	FALSE
OG0000732	-11.9667	29.9334	-11.9371	35.8742	-5.94088	FALSE
OG0000733	-17.5641	41.1282	-17.4307	46.8613	-5.73311	FALSE
OG0000734	-12.1757	30.3513	-12.8108	37.6215	-7.27021	FALSE
OG0000735	-15.3481	36.6961	-14.7224	41.4447	-4.74859	FALSE
OG0000736	-6.65138	19.3028	-7.29754	26.5951	-7.29233	FALSE
OG0000737	-17.4228	40.8455	-16.6307	45.2613	-4.4158	FALSE
OG0000738	-22.6331	51.2662	-22.9265	57.8531	-6.58693	FALSE
OG0000739	-18.5152	43.0304	-18.7079	49.4159	-6.38549	FALSE
OG0000740	-6.1971	18.3942	-5.11275	22.2255	-3.83129	FALSE
OG0000741	-19.5181	45.0362	-21.5105	55.0209	-9.9847	FALSE
OG0000742	-8.96987	23.9397	-11.4876	34.9753	-11.0355	FALSE
OG0000743	-12.1305	30.261	-12.6125	37.2249	-6.96395	FALSE
OG0000744	-20.6156	47.2312	-22.1208	56.2416	-9.01038	FALSE
OG0000745	-9.56956	25.1391	-10.1042	32.2083	-7.06919	FALSE
OG0000746	-8.32838	22.6568	-8.40377	28.8075	-6.15079	FALSE
OG0000747	-12.4973	30.9947	-11.9998	35.9996	-5.00497	FALSE
OG0000748	-8.26172	22.5234	-6.43564	24.8713	-2.34783	FALSE
OG0000749	-17.933	41.866	-17.879	47.7579	-5.89194	FALSE
OG0000750	-18.4336	42.8672	-17.4375	46.875	-4.00777	FALSE
OG0000751	-24.6513	55.3026	-24.3391	60.6782	-5.37562	FALSE
OG0000752	-12.7325	31.4649	-11.3187	34.6375	-3.17254	FALSE
OG0000753	-23.34	52.6799	-22.9515	57.903	-5.22307	FALSE
OG0000754	-19.7736	45.5472	-19.2516	50.5031	-4.95594	FALSE
OG0000755	-26.0517	58.1035	-25.4316	62.8631	-4.75965	FALSE
OG0000756	-15.4136	36.8272	-14.5957	41.1914	-4.36412	FALSE
OG0000757	-18.7517	43.5034	-18.7013	49.4027	-5.89927	FALSE
OG0000758	-8.37936	22.7587	-8.72909	29.4582	-6.69945	FALSE
OG0000759	-7.08074	20.1615	-8.06163	28.1233	-7.96179	FALSE
OG0000760	-15.4928	36.9857	-15.4391	42.8781	-5.89244	FALSE
OG0000761	-8.2318	22.4636	-8.60268	29.2054	-6.74175	FALSE
OG0000762	-20.4909	46.9818	-19.5803	51.1606	-4.17876	FALSE
OG0000763	-15.5543	37.1085	-14.8765	41.7531	-4.64456	FALSE
OG0000764	-18.5778	43.1556	-18.1684	48.3369	-5.18127	FALSE
OG0000765	-26.2348	58.4695	-25.6674	63.3347	-4.8652	FALSE
OG0000766	-15.9631	37.9263	-15.8314	43.6628	-5.73651	FALSE
OG0000767	-4.69856	15.3971	-3.81581	19.6316	-4.2345	FALSE
OG0000768	-22.811	51.622	-24.2016	60.4031	-8.78114	FALSE
OG0000769	-30.2959	66.5918	-29.4056	70.8113	-4.21948	FALSE
OG0000770	-22.5311	51.0622	-22.2651	56.5303	-5.4681	FALSE
OG0000771	-9.12048	24.241	-8.92694	29.8539	-5.61291	FALSE
OG0000772	-18.9569	43.9137	-17.1053	46.2106	-2.29686	FALSE
OG0000773	-23.5869	53.1739	-23.5802	59.1605	-5.98659	FALSE
OG0000774	-17.2837	40.5675	-16.705	45.41	-4.84251	FALSE
OG0000775	-14.7532	35.5063	-14.7903	41.5806	-6.07429	FALSE
OG0000776	-13.4244	32.8487	-12.8391	37.6782	-4.82954	FALSE
OG0000777	-18.4132	42.8264	-17.8542	47.7083	-4.8819	FALSE
OG0000778	-10.3741	26.7482	-10.2667	32.5334	-5.78519	FALSE
OG0000779	-16.4285	38.857	-15.6347	43.2694	-4.41241	FALSE
OG0000780	-24.2331	54.4662	-26.1293	64.2586	-9.79238	FALSE
OG0000781	-6.65138	19.3028	-7.29754	26.5951	-7.29233	FALSE
OG0000782	-10.502	27.0041	-10.2997	32.5993	-5.59526	FALSE
OG0000783	-18.9831	43.9662	-19.494	50.9879	-7.02173	FALSE
OG0000784	-12.1015	30.203	-12.0163	36.0326	-5.82956	FALSE
OG0000785	-10.9416	27.8831	-9.83341	31.6668	-3.78371	FALSE
OG0000786	-27.1661	60.3323	-26.394	64.788	-4.45573	FALSE
OG0000787	-30.2067	66.4133	-29.2696	70.5393	-4.12595	FALSE
OG0000788	-22.1783	50.3565	-22.58	57.16	-6.8035	FALSE
OG0000789	-13.8999	33.7998	-13.2603	38.5207	-4.72087	FALSE
OG0000790	-17.628	41.2561	-15.8773	43.7545	-2.49843	FALSE
OG0000791	-20.4839	46.9677	-20.2258	52.4516	-5.48391	FALSE
OG0000792	-20.145	46.29	-19.0469	50.0938	-3.80381	FALSE
OG0000793	-4.69856	15.3971	-3.81581	19.6316	-4.2345	FALSE
OG0000794	-14.6528	35.3055	-14.2959	40.5919	-5.28636	FALSE
OG0000795	-12.1876	30.3752	-12.9904	37.9809	-7.6057	FALSE
OG0000796	-10.7999	27.5998	-10.9041	33.8082	-6.20836	FALSE
OG0000797	-14.6275	35.2549	-14.4527	40.9054	-5.65047	FALSE
OG0000798	-8.01521	22.0304	-9.6352	31.2704	-9.23999	FALSE
OG0000799	-18.0269	42.0537	-17.6609	47.3219	-5.26816	FALSE
OG0000800	-17.4614	40.9228	-17.2459	46.4919	-5.56911	FALSE
OG0000801	-19.6038	45.2076	-18.2541	48.5082	-3.30068	FALSE
OG0000802	-12.7436	31.4872	-12.6899	37.3799	-5.89267	FALSE
OG0000803	-13.5407	33.0814	-13.5169	39.0338	-5.95247	FALSE
OG0000804	-14.0894	34.1789	-13.5741	39.1482	-4.96928	FALSE
OG0000805	-2.39343	10.7869	-2.99117	17.9823	-7.19549	FALSE
OG0000806	-12.2815	30.563	-12.2153	36.4306	-5.86754	FALSE
OG0000807	-4.96784	15.9357	-7.52808	27.0562	-11.1205	FALSE
OG0000808	-21.2849	48.5698	-20.7683	53.5366	-4.96687	FALSE
OG0000809	-16.5905	39.1809	-16.0404	44.0807	-4.89977	FALSE
OG0000810	-21.3442	48.6883	-21.9546	55.9091	-7.22083	FALSE
OG0000811	-18.1019	42.2037	-17.004	46.0081	-3.80433	FALSE
OG0000812	-6.69232	19.3846	-7.61971	27.2394	-7.85479	FALSE
OG0000813	-17.2789	40.5578	-17.4164	46.8329	-6.27506	FALSE
OG0000814	-18.6554	43.3108	-18.3848	48.7696	-5.45878	FALSE
OG0000815	-27.4437	60.8873	-30.1284	72.2568	-11.3695	FALSE
OG0000816	-4.69856	15.3971	-3.81581	19.6316	-4.2345	FALSE
OG0000817	-5.79653	17.5931	-4.9106	21.8212	-4.22813	FALSE
OG0000818	-7.08074	20.1615	-8.06163	28.1233	-7.96179	FALSE
OG0000819	-4.35466	14.7093	-4.96012	21.9202	-7.21091	FALSE
OG0000820	-11.3421	28.6841	-10.1537	32.3074	-3.6233	FALSE
OG0000821	-16.169	38.338	-15.9826	43.9651	-5.62714	FALSE
OG0000822	-20.5081	47.0162	-22.1777	56.3554	-9.33912	FALSE
OG0000823	-11.7574	29.5148	-11.8936	35.7871	-6.27229	FALSE
OG0000824	-16.8624	39.7249	-16.2591	44.5183	-4.79337	FALSE
OG0000825	-18.1128	42.2255	-18.0751	48.1502	-5.92465	FALSE
OG0000826	-11.1171	28.2342	-9.67541	31.3508	-3.11664	FALSE
OG0000827	-14.5691	35.1382	-14.7021	41.4042	-6.26597	FALSE
OG0000828	-2.39343	10.7869	-2.99117	17.9823	-7.19549	FALSE
OG0000829	-8.24655	22.4931	-8.94714	29.8943	-7.40117	FALSE
OG0000830	-7.17331	20.3466	-7.76371	27.5274	-7.1808	FALSE
OG0000831	-7.96362	21.9272	-8.03235	28.0647	-6.13747	FALSE
OG0000832	-21.8934	49.7868	-21.608	55.216	-5.42922	FALSE
OG0000833	-23.5882	53.1764	-27.2182	66.4363	-13.2599	FALSE
OG0000834	-12.712	31.424	-11.8167	35.6335	-4.20949	FALSE
OG0000835	-18.9336	43.8672	-18.6474	49.2948	-5.42755	FALSE
OG0000836	-26.0219	58.0439	-27.4079	66.8158	-8.77191	FALSE
OG0000837	-22.2816	50.5631	-24.7642	61.5285	-10.9654	FALSE
OG0000838	-21.6137	49.2274	-20.4447	52.8894	-3.662	FALSE
OG0000839	-10.1201	26.2402	-12.5796	37.1592	-10.919	FALSE
OG0000840	-17.9611	41.9222	-17.4555	46.911	-4.98876	FALSE
OG0000841	-27.7744	61.5489	-40.2287	92.4574	-30.9085	FALSE
OG0000842	-4.69856	15.3971	-3.81581	19.6316	-4.2345	FALSE
OG0000843	-9.49568	24.9914	-9.90297	31.8059	-6.81458	FALSE
OG0000844	-19.774	45.5481	-20.9446	53.8893	-8.34122	FALSE
OG0000845	-9.60677	25.2135	-8.84782	29.6956	-4.48211	FALSE
OG0000846	-14.5774	35.1548	-15.0872	42.1745	-7.01968	FALSE
OG0000847	-4.89846	15.7969	-5.37597	22.7519	-6.95502	FALSE
OG0000848	-6.69232	19.3846	-7.61971	27.2394	-7.85479	FALSE
OG0000849	-11.6877	29.3754	-11.2029	34.4058	-5.03042	FALSE
OG0000850	-24.2431	54.4862	-23.9289	59.8577	-5.37155	FALSE
OG0000851	-21.7421	49.4843	-21.2693	54.5386	-5.05437	FALSE
OG0000852	-11.5069	29.0139	-11.8285	35.657	-6.64306	FALSE
OG0000853	-14.4886	34.9771	-14.58	41.16	-6.1829	FALSE
OG0000854	-19.3901	44.7802	-19.0038	50.0077	-5.22754	FALSE
OG0000855	-11.3172	28.6344	-10.9323	33.8645	-5.23015	FALSE
OG0000856	-14.4064	34.8128	-13.2655	38.531	-3.71822	FALSE
OG0000857	-29.1613	64.3226	-29.4369	70.8739	-6.55124	FALSE
OG0000858	-11.7083	29.4165	-11.3153	34.6305	-5.21402	FALSE
OG0000860	-19.0742	44.1484	-19.0913	50.1827	-6.03428	FALSE
OG0000861	-21.9769	49.9538	-25.1797	62.3594	-12.4057	FALSE
OG0000862	-8.03371	22.0674	-7.82723	27.6545	-5.58703	FALSE
OG0000863	-22.9025	51.8051	-22.5258	57.0516	-5.24657	FALSE
OG0000864	-4.89846	15.7969	-5.37597	22.7519	-6.95502	FALSE
OG0000865	-11.8985	29.7969	-12.738	37.4759	-7.67897	FALSE
OG0000866	-12.4973	30.9947	-11.9998	35.9996	-5.00497	FALSE
OG0000867	-23.3134	52.6267	-22.9055	57.811	-5.18427	FALSE
OG0000868	-14.041	34.082	-14.5374	41.0749	-6.99291	FALSE
OG0000869	-22.9372	51.8743	-22.6116	57.2232	-5.34889	FALSE
OG0000870	-6.84518	19.6904	-7.81733	27.6347	-7.94431	FALSE
OG0000871	-18.5249	43.0497	-18.2307	48.4614	-5.41164	FALSE
OG0000872	-17.5505	41.1011	-17.5106	47.0211	-5.92005	FALSE
OG0000873	-18.11	42.22	-17.5503	47.1005	-4.88048	FALSE
OG0000874	-19.2851	44.5702	-19.096	50.1921	-5.62185	FALSE
OG0000875	-7.11915	20.2383	-7.88396	27.7679	-7.52963	FALSE
OG0000876	-19.2292	44.4584	-19.4655	50.931	-6.47257	FALSE
OG0000877	-17.1216	40.2431	-16.8934	45.7868	-5.54373	FALSE
OG0000878	-27.7864	61.5728	-30.514	73.0281	-11.4553	FALSE
OG0000879	-4.89846	15.7969	-5.37597	22.7519	-6.95502	FALSE
OG0000880	-19.4989	44.9978	-18.734	49.468	-4.47017	FALSE
OG0000881	-6.1971	18.3942	-5.11275	22.2255	-3.83129	FALSE
OG0000882	-17.7629	41.5258	-18.1226	48.2452	-6.71942	FALSE
OG0000883	-18.8775	43.7551	-18.795	49.5901	-5.83501	FALSE
OG0000884	-16.9781	39.9562	-17.0364	46.0728	-6.11661	FALSE
OG0000885	-16.4658	38.9316	-17.1267	46.2534	-7.32182	FALSE
OG0000886	-18.8591	43.7182	-17.5469	47.0938	-3.37564	FALSE
OG0000887	-15.1319	36.2638	-14.1784	40.3568	-4.09303	FALSE
OG0000888	-18.308	42.616	-17.8466	47.6932	-5.07717	FALSE
OG0000889	-19.9229	45.8458	-19.7215	51.4431	-5.59726	FALSE
OG0000890	-18.5664	43.1328	-15.9558	43.9116	-0.778791	FALSE
OG0000891	-14.7545	35.509	-14.2504	40.5008	-4.99175	FALSE
OG0000892	-10.8974	27.7949	-10.821	33.6421	-5.84724	FALSE
OG0000893	-15.1364	36.2729	-14.7757	41.5514	-5.27854	FALSE
OG0000894	-6.1971	18.3942	-5.11275	22.2255	-3.83129	FALSE
OG0000895	-20.1637	46.3274	-21.3105	54.621	-8.29358	FALSE
OG0000896	-9.60677	25.2135	-8.84782	29.6956	-4.48211	FALSE
OG0000898	-9.60677	25.2135	-8.84782	29.6956	-4.48211	FALSE
OG0000899	-15.5051	37.0103	-15.1007	42.2013	-5.19104	FALSE
OG0000900	-15.5165	37.033	-14.5266	41.0533	-4.02031	FALSE
OG0000901	-12.3903	30.7807	-12.3329	36.6658	-5.88508	FALSE
OG0000902	-6.39196	18.7839	-5.71178	23.4236	-4.63964	FALSE
OG0000903	-22.0395	50.079	-21.6345	55.2689	-5.18995	FALSE
OG0000904	-15.2704	36.5409	-14.8672	41.7345	-5.19361	FALSE
OG0000905	-22.7494	51.4987	-20.8614	53.7227	-2.22403	FALSE
OG0000906	-17.6256	41.2512	-17.7889	47.5777	-6.32655	FALSE
OG0000907	-9.44907	24.8981	-9.91093	31.8219	-6.92373	FALSE
OG0000908	-17.4642	40.9283	-17.1904	46.3809	-5.45254	FALSE
OG0000909	-12.9957	31.9914	-12.8598	37.7196	-5.72812	FALSE
OG0000910	-14.0161	34.0321	-12.5387	37.0773	-3.0452	FALSE
OG0000911	-12.6113	31.2226	-12.3847	36.7693	-5.5467	FALSE
OG0000912	-12.2373	30.4747	-11.2739	34.5479	-4.07322	FALSE
OG0000913	-7.33187	20.6637	-7.55046	27.1009	-6.43719	FALSE
OG0000914	-4.69856	15.3971	-3.81581	19.6316	-4.2345	FALSE
OG0000915	-28.1801	62.3602	-30.5233	73.0465	-10.6863	FALSE
OG0000916	-12.6675	31.3349	-13.7316	39.4633	-8.12835	FALSE
OG0000917	-10.6983	27.3966	-10.4066	32.8133	-5.41661	FALSE
OG0000918	-12.3222	30.6444	-12.4274	36.8548	-6.21034	FALSE
OG0000919	-13.7425	33.4851	-14.0783	40.1567	-6.6716	FALSE
OG0000920	-15.6091	37.2181	-15.1609	42.3219	-5.10373	FALSE
OG0000921	-17.2117	40.4233	-16.963	45.926	-5.50265	FALSE
OG0000922	-17.324	40.6481	-17.2634	46.5267	-5.87862	FALSE
OG0000923	-4.5624	15.1248	-4.74948	21.499	-6.37416	FALSE
OG0000924	-15.4782	36.9564	-15.3246	42.6492	-5.69283	FALSE
OG0000925	-18.9472	43.8945	-19.2552	50.5105	-6.61603	FALSE
OG0000926	-14.6957	35.3913	-13.613	39.2261	-3.83476	FALSE
OG0000927	-21.7834	49.5669	-21.3706	54.7412	-5.17436	FALSE
OG0000928	-2.39343	10.7869	-2.99117	17.9823	-7.19549	FALSE
OG0000929	-7.15052	20.301	-6.82787	25.6557	-5.35469	FALSE
OG0000930	-6.1971	18.3942	-5.11275	22.2255	-3.83129	FALSE
OG0000931	-21.3609	48.7218	-21.3047	54.6094	-5.88761	FALSE
OG0000932	-13.3553	32.7107	-13.0209	38.0418	-5.33116	FALSE
OG0000933	-4.89846	15.7969	-5.37597	22.7519	-6.95502	FALSE
OG0000934	-7.33187	20.6637	-7.55046	27.1009	-6.43719	FALSE
OG0000935	-16.024	38.0481	-15.7775	43.555	-5.50695	FALSE
OG0000936	-10.7735	27.5469	-11.7179	35.4358	-7.88887	FALSE
OG0000937	-16.7795	39.559	-17.8039	47.6078	-8.04881	FALSE
OG0000938	-14.6331	35.2663	-15.0919	42.1837	-6.91748	FALSE
OG0000939	-18.2534	42.5069	-18.109	48.2181	-5.71123	FALSE
OG0000940	-18.8623	43.7245	-18.7853	49.5707	-5.84614	FALSE
OG0000941	-15.6989	37.3979	-14.2561	40.5121	-3.11423	FALSE
OG0000942	-16.232	38.4639	-16.0129	44.0257	-5.5618	FALSE
OG0000943	-19.4362	44.8724	-19.4007	50.8013	-5.92899	FALSE
OG0000944	-12.3874	30.7748	-12.1785	36.357	-5.5822	FALSE
OG0000945	-6.1971	18.3942	-5.11275	22.2255	-3.83129	FALSE
OG0000946	-16.2887	38.5775	-15.5275	43.055	-4.47748	FALSE
OG0000947	-24.2228	54.4456	-25.9754	63.9508	-9.5052	FALSE
OG0000948	-18.1477	42.2954	-17.5666	47.1332	-4.83776	FALSE
OG0000949	-16.2642	38.5284	-16.042	44.0839	-5.55554	FALSE
OG0000950	-7.11361	20.2272	-7.53907	27.0781	-6.85093	FALSE
OG0000951	-20.3559	46.7118	-19.4119	50.8238	-4.11192	FALSE
OG0000952	-17.1898	40.3795	-16.8669	45.7339	-5.35434	FALSE
OG0000953	-22.9453	51.8907	-22.619	57.2379	-5.34727	FALSE
OG0000954	-6.1971	18.3942	-5.11275	22.2255	-3.83129	FALSE
OG0000955	-12.5044	31.0088	-12.714	37.428	-6.41922	FALSE
OG0000956	-12.8572	31.7145	-12.8195	37.6389	-5.92444	FALSE
OG0000957	-7.43886	20.8777	-8.46198	28.924	-8.04623	FALSE
OG0000958	-20.8664	47.7328	-24.3366	60.6732	-12.9404	FALSE
OG0000959	-16.7867	39.5734	-16.4376	44.8752	-5.30177	FALSE
OG0000960	-22.3146	50.6292	-23.2133	58.4266	-7.79743	FALSE
OG0000961	-2.39343	10.7869	-2.99117	17.9823	-7.19549	FALSE
OG0000962	-4.69856	15.3971	-3.81581	19.6316	-4.2345	FALSE
OG0000963	-22.7904	51.5807	-22.286	56.5719	-4.99124	FALSE
OG0000964	-17.331	40.662	-17.1397	46.2793	-5.61734	FALSE
OG0000965	-18.1869	42.3738	-17.711	47.422	-5.04814	FALSE
OG0000966	-4.23528	14.4706	-5.08314	22.1663	-7.69572	FALSE
OG0000967	-11.695	29.3901	-11.4897	34.9795	-5.58937	FALSE
OG0000968	-14.9477	35.8953	-14.8774	41.7549	-5.85952	FALSE
OG0000969	-18.7975	43.595	-18.3191	48.6381	-5.04315	FALSE
OG0000970	-21.1522	48.3044	-25.1581	62.3162	-14.0118	FALSE
OG0000971	-9.82763	25.6553	-9.43918	30.8784	-5.2231	FALSE
OG0000972	-5.97868	17.9574	-5.1445	22.289	-4.33164	FALSE
OG0000973	-22.1754	50.3508	-22.094	56.188	-5.83713	FALSE
OG0000976	-13.7578	33.5157	-14.2535	40.5069	-6.99126	FALSE
OG0000977	-13.7043	33.4085	-13.4777	38.9554	-5.54682	FALSE
OG0000978	-10.3253	26.6505	-10.6031	33.2062	-6.55568	FALSE
OG0000979	-18.6303	43.2606	-19.2121	50.4242	-7.16365	FALSE
OG0000980	-23.3049	52.6099	-24.4222	60.8445	-8.23457	FALSE
OG0000981	-21.3681	48.7363	-20.3089	52.6177	-3.88144	FALSE
OG0000982	-32.2924	70.5848	-34.7967	81.5934	-11.0086	FALSE
OG0000983	-19.5877	45.1753	-19.8779	51.7558	-6.58051	FALSE
OG0000984	-20.5593	47.1186	-20.7419	53.4838	-6.36519	FALSE
OG0000985	-17.7833	41.5666	-17.4223	46.8446	-5.27798	FALSE
OG0000986	-28.1508	62.3016	-27.528	67.056	-4.75441	FALSE
OG0000987	-10.502	27.0041	-10.2997	32.5993	-5.59526	FALSE
OG0000988	-11.1695	28.339	-11.3766	34.7533	-6.4143	FALSE
OG0000989	-11.2695	28.5391	-11.2823	34.5646	-6.02554	FALSE
OG0000990	-9.74125	25.4825	-10.5705	33.141	-7.65848	FALSE
OG0000991	-18.7636	43.5273	-18.0104	48.0208	-4.49355	FALSE
OG0000992	-4.69856	15.3971	-3.81581	19.6316	-4.2345	FALSE
OG0000993	-7.75615	21.5123	-6.62977	25.2595	-3.74725	FALSE
OG0000994	-17.4926	40.9853	-17.1349	46.2697	-5.28444	FALSE
OG0000995	-15.9421	37.8843	-14.9002	41.8005	-3.91621	FALSE
OG0000996	-12.1727	30.3454	-11.1473	34.2947	-3.94931	FALSE
OG0000997	-30.1217	66.2434	-29.8564	71.7127	-5.46932	FALSE
OG0000998	-4.69856	15.3971	-3.81581	19.6316	-4.2345	FALSE
OG0000999	-15.6913	37.3825	-15.6255	43.251	-5.86845	FALSE
OG0001000	-14.9165	35.833	-14.8146	41.6292	-5.79616	FALSE
OG0001001	-20.4472	46.8944	-19.2531	50.5061	-3.61172	FALSE
OG0001002	-11.1695	28.339	-11.3766	34.7533	-6.4143	FALSE
OG0001003	-10.105	26.2099	-9.59031	31.1806	-4.97072	FALSE
OG0001004	-20.8941	47.7881	-23.8737	59.7474	-11.9593	FALSE
OG0001005	-13.9781	33.9562	-13.7886	39.5773	-5.62106	FALSE
OG0001006	-14.1714	34.3428	-14.0693	40.1387	-5.7959	FALSE
OG0001007	-15.8534	37.7067	-15.5319	43.0639	-5.35715	FALSE
OG0001008	-2.39343	10.7869	-2.99117	17.9823	-7.19549	FALSE
OG0001009	-4.35466	14.7093	-4.96012	21.9202	-7.21091	FALSE
OG0001010	-21.5675	49.135	-22.506	57.0119	-7.87691	FALSE
OG0001011	-15.8896	37.7793	-16.2484	44.4967	-6.71744	FALSE
OG0001012	-20.3279	46.6558	-20.7463	53.4926	-6.8368	FALSE
OG0001013	-21.7945	49.589	-21.5917	55.1833	-5.59431	FALSE
OG0001014	-20.6622	47.3244	-20.5023	53.0046	-5.68019	FALSE
OG0001015	-2.39343	10.7869	-2.99117	17.9823	-7.19549	FALSE
OG0001016	-13.343	32.6861	-12.7043	37.4086	-4.72256	FALSE
OG0001017	-12.5793	31.1587	-12.6363	37.2726	-6.11397	FALSE
OG0001018	-11.1481	28.2963	-11.4303	34.8606	-6.56436	FALSE
OG0001019	-9.09177	24.1835	-9.22772	30.4554	-6.27189	FALSE
OG0001020	-16.361	38.7219	-15.9175	43.8351	-5.11312	FALSE
OG0001021	-6.5906	19.1812	-6.90453	25.8091	-6.62786	FALSE
OG0001022	-12.4944	30.9887	-12.3855	36.7711	-5.78235	FALSE
OG0001023	-9.60677	25.2135	-8.84782	29.6956	-4.48211	FALSE
OG0001024	-5.37283	16.7457	-6.60034	25.2007	-8.45501	FALSE
OG0001025	-14.695	35.39	-14.5647	41.1295	-5.73951	FALSE
OG0001026	-11.0579	28.1159	-10.3854	32.7708	-4.65492	FALSE
OG0001027	-11.243	28.486	-10.7812	33.5624	-5.07639	FALSE
OG0001028	-10.502	27.0041	-10.2997	32.5993	-5.59526	FALSE
OG0001029	-7.33187	20.6637	-7.55046	27.1009	-6.43719	FALSE
OG0001030	-10.8974	27.7949	-10.821	33.6421	-5.84724	FALSE
OG0001031	-15.8209	37.6417	-15.0568	42.1136	-4.47186	FALSE
OG0001032	-19.9183	45.8366	-22.5974	57.1948	-11.3583	FALSE
OG0001033	-6.84518	19.6904	-7.81733	27.6347	-7.94431	FALSE
OG0001034	-13.7239	33.4478	-13.5438	39.0875	-5.63972	FALSE
OG0001035	-31.8567	69.7133	-36.5707	85.1415	-15.4282	FALSE
OG0001036	-22.308	50.616	-22.0356	56.0711	-5.45518	FALSE
OG0001037	-7.79281	21.5856	-8.3278	28.6556	-7.06997	FALSE
OG0001038	-14.1858	34.3716	-14.0189	40.0377	-5.66612	FALSE
OG0001039	-9.60677	25.2135	-8.84782	29.6956	-4.48211	FALSE
OG0001040	-13.4261	32.8522	-13.4146	38.8293	-5.97712	FALSE
OG0001041	-6.1971	18.3942	-5.11275	22.2255	-3.83129	FALSE
OG0001042	-13.4436	32.8872	-13.2297	38.4594	-5.57221	FALSE
OG0001043	-9.27318	24.5464	-9.58913	31.1783	-6.63189	FALSE
OG0001044	-19.0851	44.1702	-20.1337	52.2674	-8.09717	FALSE
OG0001045	-16.1533	38.3066	-16.3863	44.7727	-6.46612	FALSE
OG0001046	-11.9523	29.9045	-11.9118	35.8237	-5.91919	FALSE
OG0001047	-30.8186	67.6372	-29.9771	71.9542	-4.317	FALSE
OG0001048	-10.502	27.0041	-10.2997	32.5993	-5.59526	FALSE
OG0001049	-19.2345	44.4691	-18.9775	49.955	-5.48596	FALSE
OG0001050	-10.6139	27.2279	-10.8953	33.7906	-6.56267	FALSE
OG0001051	-6.84518	19.6904	-7.81733	27.6347	-7.94431	FALSE
OG0001052	-26.8975	59.7951	-29.8535	71.7069	-11.9118	FALSE
OG0001053	-23.7052	53.4104	-19.882	51.764	1.64643	FALSE
OG0001054	-20.4291	46.8582	-20.5594	53.1188	-6.26058	FALSE
OG0001055	-6.1971	18.3942	-5.11275	22.2255	-3.83129	FALSE
OG0001056	-18.7875	43.575	-18.9268	49.8536	-6.27858	FALSE
OG0001057	-31.3497	68.6994	-31.074	74.148	-5.44859	FALSE
OG0001058	-19.567	45.1341	-18.9793	49.9586	-4.82453	FALSE
OG0001059	-13.3055	32.611	-13.9408	39.8815	-7.27053	FALSE
OG0001060	-8.32915	22.6583	-8.18621	28.3724	-5.71411	FALSE
OG0001061	-12.6346	31.2692	-12.1264	36.2529	-4.98369	FALSE
OG0001062	-22.4632	50.9263	-25.4785	62.9569	-12.0306	FALSE
OG0001063	-17.1629	40.3258	-16.9879	45.9759	-5.65011	FALSE
OG0001064	-18.6985	43.397	-20.6666	53.3332	-9.93621	FALSE
OG0001065	-17.2932	40.5864	-17.2616	46.5233	-5.93689	FALSE
OG0001066	-7.17331	20.3466	-7.76371	27.5274	-7.1808	FALSE
OG0001067	-10.8145	27.629	-10.9794	33.9588	-6.32987	FALSE
OG0001068	-6.32399	18.648	-6.80837	25.6167	-6.96876	FALSE
OG0001069	-13.6839	33.3679	-13.2669	38.5338	-5.16594	FALSE
OG0001070	-6.594	19.188	-7.04538	26.0908	-6.90277	FALSE
OG0001071	-13.8905	33.781	-11.8158	35.6316	-1.85057	FALSE
OG0001072	-2.39343	10.7869	-2.99117	17.9823	-7.19549	FALSE
OG0001073	-24.5117	55.0233	-24.8985	61.797	-6.77366	FALSE
OG0001074	-22.6081	51.2162	-22.5075	57.015	-5.79881	FALSE
OG0001075	-31.8355	69.671	-32.7626	77.5252	-7.85419	FALSE
OG0001076	-18.1108	42.2215	-17.4705	46.941	-4.71945	FALSE
OG0001077	-25.7815	57.563	-26.0336	64.0672	-6.5042	FALSE
OG0001078	-19.8197	45.6394	-18.2675	48.535	-2.89562	FALSE
OG0001079	-20.9893	47.9785	-20.7234	53.4469	-5.46836	FALSE
OG0001080	-12.4003	30.8006	-12.358	36.716	-5.91544	FALSE
OG0001081	-23.1063	52.2127	-27.7754	67.5508	-15.3381	FALSE
OG0001082	-20.6042	47.2083	-21.0664	54.1329	-6.92459	FALSE
OG0001083	-13.9977	33.9955	-13.8255	39.6511	-5.65559	FALSE
OG0001084	-14.4885	34.977	-14.8969	41.7939	-6.81691	FALSE
OG0001085	-5.21025	16.4205	-5.46736	22.9347	-6.51423	FALSE
OG0001086	-12.842	31.6841	-13.3032	38.6065	-6.92241	FALSE
OG0001087	-18.5206	43.0413	-18.6157	49.2313	-6.19005	FALSE
OG0001088	-10.3669	26.7338	-9.92356	31.8471	-5.11337	FALSE
OG0001089	-4.89846	15.7969	-5.37597	22.7519	-6.95502	FALSE
OG0001090	-7.33187	20.6637	-7.55046	27.1009	-6.43719	FALSE
OG0001091	-12.0382	30.0764	-12.019	36.038	-5.96163	FALSE
OG0001092	-13.9463	33.8926	-13.5231	39.0463	-5.15367	FALSE
OG0001093	-24.1635	54.3271	-25.2401	62.4801	-8.15305	FALSE
OG0001094	-12.5189	31.0378	-12.1561	36.3122	-5.2745	FALSE
OG0001095	-21.7964	49.5928	-23.2665	58.5331	-8.94028	FALSE
OG0001096	-20.197	46.3941	-19.9959	51.9918	-5.59774	FALSE
OG0001097	-19.6009	45.2017	-20.0669	52.1338	-6.9321	FALSE
OG0001098	-13.2679	32.5358	-13.0033	38.0066	-5.47079	FALSE
OG0001099	-14.609	35.2179	-14.2693	40.5386	-5.32066	FALSE
OG0001100	-17.9516	41.9032	-16.6126	45.2252	-3.32201	FALSE
OG0001101	-16.4525	38.905	-15.4607	42.9214	-4.01643	FALSE
OG0001102	-15.3591	36.7182	-15.2975	42.595	-5.87678	FALSE
OG0001103	-4.69856	15.3971	-3.81581	19.6316	-4.2345	FALSE
OG0001104	-20.2374	46.4747	-22.6893	57.3785	-10.9038	FALSE
OG0001105	-4.69856	15.3971	-3.81581	19.6316	-4.2345	FALSE
OG0001106	-19.9857	45.9714	-20.9008	53.8015	-7.8301	FALSE
OG0001107	-2.39343	10.7869	-2.99117	17.9823	-7.19549	FALSE
OG0001108	-17.2364	40.4727	-16.8395	45.679	-5.20623	FALSE
OG0001109	-12.5428	31.0857	-12.2367	36.4735	-5.38777	FALSE
OG0001110	-11.9177	29.8354	-10.8668	33.7336	-3.89821	FALSE
OG0001111	-19.772	45.5441	-19.3619	50.7239	-5.17983	FALSE
OG0001112	-18.4102	42.8204	-18.0081	48.0162	-5.1958	FALSE
OG0001113	-20.2322	46.4645	-21.1742	54.3483	-7.88385	FALSE
OG0001114	-7.33187	20.6637	-7.55046	27.1009	-6.43719	FALSE
OG0001115	-9.60677	25.2135	-8.84782	29.6956	-4.48211	FALSE
OG0001116	-18.485	42.9701	-17.9755	47.9511	-4.98096	FALSE
OG0001117	-18.1261	42.2522	-17.4525	46.905	-4.65279	FALSE
OG0001118	-16.2284	38.4568	-15.0433	42.0865	-3.62973	FALSE
OG0001119	-23.557	53.114	-23.6953	59.3905	-6.27655	FALSE
OG0001120	-13.9977	33.9955	-13.8255	39.6511	-5.65559	FALSE
OG0001121	-10.8974	27.7949	-10.821	33.6421	-5.84724	FALSE
OG0001122	-16.2638	38.5276	-15.8496	43.6993	-5.17172	FALSE
OG0001123	-10.4718	26.9436	-8.9166	29.8332	-2.88965	FALSE
OG0001124	-11.0525	28.1051	-10.8086	33.6172	-5.51211	FALSE
OG0001125	-14.8145	35.629	-14.5904	41.1808	-5.55176	FALSE
OG0001126	-7.3938	20.7876	-8.05852	28.117	-7.32944	FALSE
OG0001127	-4.5624	15.1248	-4.74948	21.499	-6.37416	FALSE
OG0001128	-13.9779	33.9558	-13.8614	39.7229	-5.76703	FALSE
OG0001129	-16.5268	39.0536	-16.5763	45.1526	-6.09905	FALSE
OG0001130	-33.3941	72.7881	-41.3522	94.7044	-21.9163	FALSE
OG0001131	-8.52597	23.0519	-8.24299	28.486	-5.43404	FALSE
OG0001132	-4.58593	15.1719	-5.31989	22.6398	-7.4679	FALSE
OG0001133	-4.5624	15.1248	-4.74948	21.499	-6.37416	FALSE
OG0001134	-9.62451	25.249	-9.72761	31.4552	-6.20621	FALSE
OG0001135	-16.196	38.3921	-16.2243	44.4485	-6.05645	FALSE
OG0001136	-13.2131	32.4261	-12.9664	37.9327	-5.50658	FALSE
OG0001137	-18.5379	43.0759	-18.3615	48.7231	-5.64716	FALSE
OG0001138	-6.1971	18.3942	-5.11275	22.2255	-3.83129	FALSE
OG0001139	-12.7708	31.5416	-13.3127	38.6254	-7.08381	FALSE
OG0001140	-16.5151	39.0302	-16.5435	45.087	-6.05686	FALSE
OG0001141	-9.93446	25.8689	-11.092	34.1841	-8.31515	FALSE
OG0001142	-14.0099	34.0199	-14.0636	40.1272	-6.10731	FALSE
OG0001143	-6.1971	18.3942	-5.11275	22.2255	-3.83129	FALSE
OG0001144	-21.0211	48.0422	-19.1802	50.3604	-2.31811	FALSE
OG0001145	-6.79478	19.5896	-7.75801	27.516	-7.92644	FALSE
OG0001146	-26.2239	58.4478	-26.0148	64.0295	-5.58175	FALSE
OG0001147	-10.432	26.8641	-11.5924	35.1848	-8.32074	FALSE
OG0001148	-8.90725	23.8145	-9.17663	30.3533	-6.53877	FALSE
OG0001149	-17.0118	40.0235	-16.4056	44.8111	-4.7876	FALSE
OG0001150	-7.33187	20.6637	-7.55046	27.1009	-6.43719	FALSE
OG0001151	-14.7421	35.4842	-14.3871	40.7743	-5.2901	FALSE
OG0001152	-8.1963	22.3926	-8.20071	28.4014	-6.00881	FALSE
OG0001153	-18.1721	42.3442	-17.6623	47.3247	-4.9805	FALSE
OG0001154	-11.9523	29.9045	-11.9118	35.8237	-5.91919	FALSE
OG0001155	-17.3399	40.6799	-17.2366	46.4732	-5.79328	FALSE
OG0001156	-18.7522	43.5043	-19.1994	50.3987	-6.89441	FALSE
OG0001157	-19.8285	45.6569	-18.2596	48.5192	-2.86222	FALSE
OG0001158	-25.8573	57.7146	-24.5112	61.0224	-3.3078	FALSE
OG0001159	-19.3297	44.6594	-19.2735	50.547	-5.88756	FALSE
OG0001160	-5.21025	16.4205	-5.46736	22.9347	-6.51423	FALSE
OG0001161	-8.26866	22.5373	-7.44395	26.8879	-4.35057	FALSE
OG0001162	-17.5631	41.1261	-17.2509	46.5018	-5.37568	FALSE
OG0001163	-15.4875	36.9751	-13.7994	39.5987	-2.62364	FALSE
OG0001164	-12.1467	30.2934	-12.1192	36.2384	-5.94496	FALSE
OG0001165	-12.2202	30.4403	-11.9937	35.9873	-5.54704	FALSE
OG0001166	-14.7177	35.4355	-14.4554	40.9108	-5.47533	FALSE
OG0001167	-8.90725	23.8145	-9.17663	30.3533	-6.53877	FALSE
OG0001168	-7.33187	20.6637	-7.55046	27.1009	-6.43719	FALSE
OG0001169	-13.9089	33.8177	-13.9853	39.9705	-6.15279	FALSE
OG0001170	-13.0143	32.0286	-12.6451	37.2902	-5.26157	FALSE
OG0001171	-4.3335	14.667	-4.70578	21.4116	-6.74456	FALSE
OG0001172	-10.3386	26.6772	-10.3095	32.6191	-5.94187	FALSE
OG0001173	-15.2462	36.4924	-14.9382	41.8765	-5.38408	FALSE
OG0001174	-5.07908	16.1582	-6.75044	25.5009	-9.34273	FALSE
OG0001175	-18.6558	43.3117	-19.4748	50.9497	-7.638	FALSE
OG0001176	-18.2471	42.4942	-17.6835	47.367	-4.87279	FALSE
OG0001177	-18.85	43.7	-17.0959	46.1918	-2.49184	FALSE
OG0001178	-11.8454	29.6908	-11.821	35.642	-5.95118	FALSE
OG0001179	-22.4032	50.8065	-22.1323	56.2646	-5.45811	FALSE
OG0001180	-2.39343	10.7869	-2.99117	17.9823	-7.19549	FALSE
OG0001181	-4.3335	14.667	-4.70578	21.4116	-6.74456	FALSE
OG0001182	-8.52597	23.0519	-8.24299	28.486	-5.43404	FALSE
OG0001183	-16.7697	39.5394	-16.3201	44.6402	-5.10086	FALSE
OG0001184	-18.8822	43.7644	-18.7073	49.4146	-5.65016	FALSE
OG0001185	-7.33187	20.6637	-7.55046	27.1009	-6.43719	FALSE
OG0001186	-18.1764	42.3529	-18.1682	48.3364	-5.9835	FALSE
OG0001187	-20.8041	47.6083	-20.9014	53.8029	-6.19461	FALSE
OG0001188	-6.1971	18.3942	-5.11275	22.2255	-3.83129	FALSE
OG0001189	-14.5418	35.0837	-14.4352	40.8704	-5.78671	FALSE
OG0001190	-18.154	42.3079	-17.6374	47.2749	-4.96695	FALSE
OG0001191	-14.6749	35.3498	-14.6534	41.3067	-5.95688	FALSE
OG0001192	-20.9544	47.9089	-20.3604	52.7207	-4.81184	FALSE
OG0001193	-17.5694	41.1388	-17.7652	47.5304	-6.39159	FALSE
OG0001194	-4.69856	15.3971	-3.81581	19.6316	-4.2345	FALSE
OG0001195	-6.39196	18.7839	-5.71178	23.4236	-4.63964	FALSE
OG0001196	-22.9145	51.829	-24.8575	61.715	-9.88602	FALSE
OG0001197	-18.7167	43.4335	-19.0805	50.161	-6.72751	FALSE
OG0001198	-23.2999	52.5999	-25.4243	62.8486	-10.2487	FALSE
OG0001199	-16.7423	39.4847	-16.3438	44.6876	-5.20293	FALSE
OG0001200	-10.7999	27.5998	-10.9041	33.8082	-6.20836	FALSE
OG0001201	-4.69856	15.3971	-3.81581	19.6316	-4.2345	FALSE
OG0001202	-14.7325	35.4649	-14.6296	41.2593	-5.79435	FALSE
OG0001203	-19.1989	44.3978	-18.6181	49.2361	-4.83835	FALSE
OG0001204	-16.0174	38.0348	-15.9473	43.8946	-5.85986	FALSE
OG0001205	-11.1066	28.2132	-11.1779	34.3557	-6.14252	FALSE
OG0001206	-4.69856	15.3971	-3.81581	19.6316	-4.2345	FALSE
OG0001207	-2.39343	10.7869	-2.99117	17.9823	-7.19549	FALSE
OG0001208	-15.2735	36.547	-15.4095	42.819	-6.27202	FALSE
OG0001209	-6.1971	18.3942	-5.11275	22.2255	-3.83129	FALSE
OG0001210	-14.7577	35.5154	-14.4184	40.8367	-5.32134	FALSE
OG0001211	-14.2072	34.4143	-14.6634	41.3268	-6.9125	FALSE
OG0001212	-19.3499	44.6998	-19.8391	51.6782	-6.97845	FALSE
OG0001213	-19.9268	45.8535	-20.651	53.302	-7.4485	FALSE
OG0001214	-5.21025	16.4205	-5.46736	22.9347	-6.51423	FALSE
OG0001215	-16.4333	38.8665	-16.3121	44.6242	-5.75766	FALSE
OG0001216	-10.7724	27.5448	-10.5554	33.1108	-5.56601	FALSE
OG0001217	-9.18568	24.3714	-9.71974	31.4395	-7.06812	FALSE
OG0001218	-16.1128	38.2256	-16.1081	44.2162	-5.9906	FALSE
OG0001219	-21.182	48.3641	-22.8759	57.7518	-9.38769	FALSE
OG0001220	-10.727	27.4541	-8.62155	29.2431	-1.78902	FALSE
OG0001221	-20.5503	47.1007	-21.0613	54.1226	-7.02194	FALSE
OG0001222	-9.80722	25.6144	-10.0805	32.161	-6.54659	FALSE
OG0001223	-2.39343	10.7869	-2.99117	17.9823	-7.19549	FALSE
OG0001224	-9.87154	25.7431	-9.88077	31.7615	-6.01846	FALSE
OG0001225	-25.089	56.1779	-25.5326	63.0653	-6.88734	FALSE
OG0001228	-2.39343	10.7869	-2.99117	17.9823	-7.19549	FALSE
OG0001229	-26.5862	59.1723	-28.4385	68.8771	-9.70475	FALSE
OG0001230	-6.69439	19.3888	-7.16427	26.3285	-6.93974	FALSE
OG0001231	-4.3335	14.667	-4.70578	21.4116	-6.74456	FALSE
OG0001232	-20.6136	47.2271	-22.5402	57.0803	-9.8532	FALSE
OG0001233	-19.7357	45.4713	-19.5322	51.0643	-5.59298	FALSE
OG0001234	-17.3945	40.789	-18.3534	48.7068	-7.9178	FALSE
OG0001235	-22.6602	51.3203	-22.1091	56.2182	-4.89788	FALSE
OG0001236	-18.4407	42.8814	-18.5606	49.1212	-6.23983	FALSE
OG0001237	-17.0055	40.0109	-17.7526	47.5052	-7.49424	FALSE
OG0001238	-18.8848	43.7696	-18.5625	49.125	-5.35538	FALSE
OG0001239	-16.8876	39.7752	-16.5097	45.0194	-5.24423	FALSE
OG0001240	-2.39343	10.7869	-2.99117	17.9823	-7.19549	FALSE
OG0001241	-14.4595	34.919	-14.2383	40.4767	-5.55764	FALSE
OG0001242	-14.6231	35.2462	-14.4155	40.831	-5.58482	FALSE
OG0001243	-15.4563	36.9126	-15.2177	42.4354	-5.52279	FALSE
OG0001244	-12.8432	31.6864	-13.0374	38.0748	-6.3884	FALSE
OG0001245	-7.08074	20.1615	-8.06163	28.1233	-7.96179	FALSE
OG0001246	-13.1039	32.2078	-12.9877	37.9755	-5.76763	FALSE
OG0001247	-8.08533	22.1707	-6.98806	25.9761	-3.80546	FALSE
OG0001248	-6.39196	18.7839	-5.71178	23.4236	-4.63964	FALSE
OG0001249	-17.3688	40.7376	-17.4298	46.8596	-6.12202	FALSE
OG0001250	-10.6302	27.2605	-10.4191	32.8383	-5.5778	FALSE
OG0001251	-6.89984	19.7997	-7.45469	26.9094	-7.10971	FALSE
OG0001252	-13.2416	32.4833	-12.2431	36.4862	-4.00293	FALSE
OG0001253	-17.3937	40.7874	-17.0875	46.175	-5.38766	FALSE
OG0001254	-2.39343	10.7869	-2.99117	17.9823	-7.19549	FALSE
OG0001255	-7.33187	20.6637	-7.55046	27.1009	-6.43719	FALSE
OG0001256	-12.6816	31.3632	-12.5773	37.1547	-5.79146	FALSE
OG0001257	-11.6952	29.3904	-12.3064	36.6128	-7.22246	FALSE
OG0001258	-4.96784	15.9357	-7.52808	27.0562	-11.1205	FALSE
OG0001259	-2.39343	10.7869	-2.99117	17.9823	-7.19549	FALSE
OG0001260	-6.1971	18.3942	-5.11275	22.2255	-3.83129	FALSE
OG0001261	-10.6192	27.2383	-10.8025	33.6049	-6.3666	FALSE
OG0001262	-12.1717	30.3433	-12.0729	36.1459	-5.80256	FALSE
OG0001263	-9.09177	24.1835	-9.22772	30.4554	-6.27189	FALSE
OG0001264	-6.1971	18.3942	-5.11275	22.2255	-3.83129	FALSE
OG0001265	-4.5624	15.1248	-4.74948	21.499	-6.37416	FALSE
OG0001266	-18.1739	42.3478	-17.587	47.174	-4.82617	FALSE
OG0001267	-31.2389	68.4779	-32.3314	76.6628	-8.18496	FALSE
OG0001268	-15.4137	36.8275	-15.2028	42.4057	-5.5782	FALSE
OG0001269	-18.7158	43.4316	-18.0159	48.0319	-4.60022	FALSE
OG0001270	-7.75615	21.5123	-6.62977	25.2595	-3.74725	FALSE
OG0001271	-2.39343	10.7869	-2.99117	17.9823	-7.19549	FALSE
OG0001272	-11.861	29.722	-11.581	35.1621	-5.44012	FALSE
OG0001273	-17.5202	41.0405	-17.3544	46.7089	-5.66836	FALSE
OG0001275	-4.69856	15.3971	-3.81581	19.6316	-4.2345	FALSE
OG0001276	-21.2441	48.4883	-22.9782	57.9565	-9.46817	FALSE
OG0001277	-24.2802	54.5603	-26.7479	65.4958	-10.9354	FALSE
OG0001278	-12.5793	31.1587	-12.6363	37.2726	-6.11397	FALSE
OG0001279	-25.7856	57.5711	-25.565	63.13	-5.55886	FALSE
OG0001280	-19.7845	45.5689	-20.9024	53.8048	-8.2359	FALSE
OG0001281	-4.69856	15.3971	-3.81581	19.6316	-4.2345	FALSE
OG0001282	-16.6211	39.2422	-16.6084	45.2168	-5.97466	FALSE
OG0001283	-20.5721	47.1442	-19.6521	51.3042	-4.16003	FALSE
OG0001284	-12.8876	31.7751	-12.7433	37.4867	-5.71155	FALSE
OG0001285	-16.1611	38.3223	-15.5876	43.1752	-4.8529	FALSE
OG0001286	-5.21025	16.4205	-5.46736	22.9347	-6.51423	FALSE
OG0001287	-19.0039	44.0079	-19.2041	50.4083	-6.40039	FALSE
OG0001288	-20.7311	47.4621	-20.4482	52.8964	-5.43424	FALSE
OG0001289	-16.7127	39.4255	-18.4113	48.8227	-9.39718	FALSE
OG0001290	-12.0558	30.1117	-12.2641	36.5283	-6.4166	FALSE
OG0001291	-14.4943	34.9886	-14.1975	40.3949	-5.4063	FALSE
OG0001292	-14.159	34.318	-14.0495	40.099	-5.78095	FALSE
OG0001293	-8.22372	22.4474	-5.76514	23.5303	-1.08284	FALSE
OG0001294	-22.8833	51.7666	-22.6584	57.3168	-5.55024	FALSE
OG0001295	-10.0383	26.0767	-7.84428	27.6886	-1.61188	FALSE
OG0001296	-7.21129	20.4226	-7.2032	26.4064	-5.98383	FALSE
OG0001297	-11.9839	29.9677	-11.9478	35.8956	-5.92791	FALSE
OG0001298	-2.39343	10.7869	-2.99117	17.9823	-7.19549	FALSE
OG0001299	-21.3835	48.7671	-21.6183	55.2365	-6.46948	FALSE
OG0001300	-5.60398	17.208	-6.946	25.892	-8.68403	FALSE
OG0001301	-11.1796	28.3593	-11.1592	34.3184	-5.95909	FALSE
OG0001302	-13.7596	33.5192	-13.8713	39.7426	-6.22347	FALSE
OG0001303	-11.8347	29.6695	-11.3665	34.733	-5.06354	FALSE
OG0001304	-8.08533	22.1707	-6.98806	25.9761	-3.80546	FALSE
OG0001305	-7.70475	21.4095	-6.69089	25.3818	-3.97229	FALSE
OG0001306	-12.9635	31.927	-12.0788	36.1575	-4.23046	FALSE
OG0001307	-13.5096	33.0192	-12.7424	37.4847	-4.4655	FALSE
OG0001308	-6.594	19.188	-7.04538	26.0908	-6.90277	FALSE
OG0001309	-11.5507	29.1013	-10.2721	32.5441	-3.44282	FALSE
OG0001310	-9.60677	25.2135	-8.84782	29.6956	-4.48211	FALSE
OG0001311	-10.2759	26.5517	-10.3995	32.799	-6.24725	FALSE
OG0001312	-6.39221	18.7844	-6.3168	24.6336	-5.84918	FALSE
OG0001313	-2.39343	10.7869	-2.99117	17.9823	-7.19549	FALSE
OG0001314	-21.74	49.48	-24.781	61.5619	-12.0819	FALSE
OG0001315	-4.23528	14.4706	-5.08314	22.1663	-7.69572	FALSE
OG0001316	-4.5624	15.1248	-4.74948	21.499	-6.37416	FALSE
OG0001317	-6.39196	18.7839	-5.71178	23.4236	-4.63964	FALSE
OG0001318	-17.1081	40.2162	-16.5731	45.1462	-4.92991	FALSE
OG0001319	-2.39343	10.7869	-2.99117	17.9823	-7.19549	FALSE
OG0001320	-7.33187	20.6637	-7.55046	27.1009	-6.43719	FALSE
OG0001321	-20.7414	47.4828	-20.9581	53.9161	-6.43334	FALSE
OG0001322	-18.443	42.8859	-16.8807	45.7613	-2.87541	FALSE
OG0001323	-9.09177	24.1835	-9.22772	30.4554	-6.27189	FALSE
OG0001324	-2.39343	10.7869	-2.99117	17.9823	-7.19549	FALSE
OG0001325	-17.7072	41.4145	-17.8847	47.7693	-6.35486	FALSE
OG0001326	-17.3936	40.7871	-17.2213	46.4427	-5.65556	FALSE
OG0001327	-14.1837	34.3674	-14.047	40.0939	-5.72653	FALSE
OG0001328	-17.7932	41.5864	-17.7244	47.4487	-5.86234	FALSE
OG0001329	-19.5741	45.1483	-23.1179	58.2359	-13.0876	FALSE
OG0001330	-11.2623	28.5246	-10.9812	33.9624	-5.4378	FALSE
OG0001331	-17.26	40.5201	-16.9875	45.975	-5.45492	FALSE
OG0001332	-18.1371	42.2742	-17.8167	47.6334	-5.35922	FALSE
OG0001333	-4.35466	14.7093	-4.96012	21.9202	-7.21091	FALSE
OG0001334	-9.03699	24.074	-9.11082	30.2216	-6.14766	FALSE
OG0001335	-10.2615	26.523	-11.3	34.6001	-8.07708	FALSE
OG0001336	-4.96784	15.9357	-7.52808	27.0562	-11.1205	FALSE
OG0001337	-13.9473	33.8946	-13.6012	39.2023	-5.30771	FALSE
OG0001338	-17.2781	40.5562	-16.2477	44.4953	-3.93907	FALSE
OG0001339	-8.82101	23.642	-11.5813	35.1626	-11.5206	FALSE
OG0001340	-20.6605	47.3211	-20.3769	52.7538	-5.43271	FALSE
OG0001341	-12.6877	31.3755	-12.3628	36.7256	-5.35012	FALSE
OG0001342	-11.3537	28.7073	-11.5697	35.1393	-6.43199	FALSE
OG0001343	-14.0421	34.0841	-12.3075	36.6149	-2.5308	FALSE
OG0001344	-9.3239	24.6478	-9.45521	30.9104	-6.26263	FALSE
OG0001345	-7.33187	20.6637	-7.55046	27.1009	-6.43719	FALSE
OG0001346	-15.9722	37.9443	-15.9886	43.9771	-6.03282	FALSE
OG0001347	-14.3179	34.6359	-14.1684	40.3367	-5.70082	FALSE
OG0001348	-15.925	37.8499	-15.2713	42.5425	-4.69258	FALSE
OG0001349	-11.8347	29.6695	-11.3665	34.733	-5.06354	FALSE
OG0001350	-23.1273	52.2545	-23.9591	59.9182	-7.66371	FALSE
OG0001351	-7.47864	20.9573	-7.90073	27.8015	-6.84417	FALSE
OG0001352	-17.5896	41.1792	-17.2426	46.4852	-5.30602	FALSE
OG0001353	-2.39343	10.7869	-2.99117	17.9823	-7.19549	FALSE
OG0001354	-13.9306	33.8612	-14.2266	40.4532	-6.59194	FALSE
OG0001355	-9.7278	25.4556	-9.86829	31.7366	-6.28097	FALSE
OG0001356	-8.24655	22.4931	-8.94714	29.8943	-7.40117	FALSE
OG0001357	-9.60677	25.2135	-8.84782	29.6956	-4.48211	FALSE
OG0001358	-12.9282	31.8564	-13.1021	38.2042	-6.34778	FALSE
OG0001359	-19.267	44.534	-21.4764	54.9529	-10.4189	FALSE
OG0001360	-10.4641	26.9281	-9.7149	31.4298	-4.50167	FALSE
OG0001361	-16.4844	38.9688	-16.4119	44.8238	-5.85504	FALSE
OG0001362	-7.79071	21.5814	-7.99798	27.996	-6.41453	FALSE
OG0001363	-2.39343	10.7869	-2.99117	17.9823	-7.19549	FALSE
OG0001364	-16.1823	38.3646	-16.0463	44.0926	-5.72801	FALSE
OG0001365	-11.1796	28.3593	-11.1592	34.3184	-5.95909	FALSE
OG0001366	-12.505	31.0099	-12.1825	36.365	-5.35504	FALSE
OG0001367	-7.70067	21.4013	-7.87013	27.7403	-6.33891	FALSE
OG0001368	-25.9784	57.9569	-26.7034	65.4068	-7.4499	FALSE
OG0001369	-10.7981	27.5962	-9.49828	30.9966	-3.40037	FALSE
OG0001370	-10.2546	26.5092	-10.025	32.0501	-5.54091	FALSE
OG0001371	-7.43564	20.8713	-7.59109	27.1822	-6.31089	FALSE
OG0001372	-14.7325	35.4649	-14.6296	41.2593	-5.79435	FALSE
OG0001373	-6.1971	18.3942	-5.11275	22.2255	-3.83129	FALSE
OG0001374	-6.1971	18.3942	-5.11275	22.2255	-3.83129	FALSE
OG0001375	-9.96585	25.9317	-10.3332	32.6665	-6.73476	FALSE
OG0001376	-23.7481	53.4962	-24.0575	60.1149	-6.61873	FALSE
OG0001377	-28.2399	62.4797	-27.4853	66.9706	-4.49084	FALSE
OG0001378	-26.0271	58.0543	-22.5858	57.1716	0.882722	FALSE
OG0001379	-25.5321	57.0642	-25.0134	62.0268	-4.96252	FALSE
OG0001380	-17.1766	40.3532	-16.9419	45.8838	-5.53061	FALSE
OG0001381	-2.39343	10.7869	-2.99117	17.9823	-7.19549	FALSE
OG0001382	-12.5101	31.0201	-12.5927	37.1854	-6.16532	FALSE
OG0001383	-18.6225	43.245	-18.399	48.798	-5.55302	FALSE
OG0001384	-4.69856	15.3971	-3.81581	19.6316	-4.2345	FALSE
OG0001385	-7.33187	20.6637	-7.55046	27.1009	-6.43719	FALSE
OG0001386	-4.69856	15.3971	-3.81581	19.6316	-4.2345	FALSE
OG0001387	-2.39343	10.7869	-2.99117	17.9823	-7.19549	FALSE
OG0001388	-6.84518	19.6904	-7.81733	27.6347	-7.94431	FALSE
OG0001389	-19.6041	45.2083	-18.9891	49.9782	-4.76995	FALSE
OG0001390	-17.2968	40.5936	-17.665	47.33	-6.73641	FALSE
OG0001391	-19.6233	45.2466	-19.3255	50.651	-5.40444	FALSE
OG0001392	-18.8244	43.6489	-18.592	49.184	-5.53517	FALSE
OG0001393	-20.2226	46.4451	-20.0182	52.0365	-5.59136	FALSE
OG0001394	-20.4285	46.857	-20.2034	52.4067	-5.54971	FALSE
OG0001395	-18.791	43.582	-19.4778	50.9557	-7.37368	FALSE
OG0001396	-7.38414	20.7683	-7.81106	27.6221	-6.85383	FALSE
OG0001397	-18.4142	42.8284	-19.1612	50.3225	-7.49408	FALSE
OG0001398	-7.17331	20.3466	-7.76371	27.5274	-7.1808	FALSE
OG0001399	-21.2012	48.4024	-22.5959	57.1919	-8.78944	FALSE
OG0001400	-17.4105	40.8211	-17.1299	46.2599	-5.43882	FALSE
OG0001401	-9.80643	25.6129	-9.41232	30.8246	-5.21177	FALSE
OG0001402	-8.08533	22.1707	-6.98806	25.9761	-3.80546	FALSE
OG0001403	-12.2815	30.563	-12.2153	36.4306	-5.86754	FALSE
OG0001404	-2.39343	10.7869	-2.99117	17.9823	-7.19549	FALSE
OG0001405	-7.35491	20.7098	-7.52208	27.0442	-6.33436	FALSE
OG0001406	-12.8494	31.6987	-12.9074	37.8149	-6.11616	FALSE
OG0001407	-7.55317	21.1063	-7.14405	26.2881	-5.18176	FALSE
OG0001408	-6.594	19.188	-7.04538	26.0908	-6.90277	FALSE
OG0001409	-2.39343	10.7869	-2.99117	17.9823	-7.19549	FALSE
OG0001410	-10.7999	27.5998	-10.9041	33.8082	-6.20836	FALSE
OG0001411	-9.18568	24.3714	-9.71974	31.4395	-7.06812	FALSE
OG0001412	-2.39343	10.7869	-2.99117	17.9823	-7.19549	FALSE
OG0001413	-7.33187	20.6637	-7.55046	27.1009	-6.43719	FALSE
OG0001414	-19.6039	45.2079	-17.7634	47.5267	-2.31882	FALSE
OG0001415	-12.5267	31.0534	-12.3381	36.6761	-5.62272	FALSE
OG0001416	-9.52891	25.0578	-9.83278	31.6656	-6.60774	FALSE
OG0001417	-2.39343	10.7869	-2.99117	17.9823	-7.19549	FALSE
OG0001418	-2.39343	10.7869	-2.99117	17.9823	-7.19549	FALSE
OG0001419	-10.6139	27.2279	-10.8953	33.7906	-6.56267	FALSE
OG0001420	-13.9125	33.8251	-12.9872	37.9744	-4.14933	FALSE
OG0001421	-2.39343	10.7869	-2.99117	17.9823	-7.19549	FALSE
OG0001422	-16.1523	38.3045	-15.5524	43.1047	-4.80019	FALSE
OG0001423	-7.79071	21.5814	-7.99798	27.996	-6.41453	FALSE
OG0001424	-7.33187	20.6637	-7.55046	27.1009	-6.43719	FALSE
OG0001425	-13.8121	33.6242	-13.7453	39.4906	-5.86648	FALSE
OG0001426	-20.2656	46.5312	-20.0362	52.0723	-5.54116	FALSE
OG0001427	-20.2631	46.5263	-20.0689	52.1379	-5.61162	FALSE
OG0001428	-2.39343	10.7869	-2.99117	17.9823	-7.19549	FALSE
OG0001429	-7.75615	21.5123	-6.62977	25.2595	-3.74725	FALSE
OG0001430	-2.39343	10.7869	-2.99117	17.9823	-7.19549	FALSE
OG0001431	-2.39343	10.7869	-2.99117	17.9823	-7.19549	FALSE
OG0001432	-12.8962	31.7924	-12.8401	37.6803	-5.88784	FALSE
OG0001433	-9.09177	24.1835	-9.22772	30.4554	-6.27189	FALSE
OG0001434	-7.33187	20.6637	-7.55046	27.1009	-6.43719	FALSE
OG0001436	-9.52957	25.0591	-8.97369	29.9474	-4.88823	FALSE
OG0001437	-16.9917	39.9833	-17.1767	46.3534	-6.37006	FALSE
OG0001438	-31.7958	69.5916	-32.2518	76.5036	-6.91194	FALSE
OG0001439	-18.5739	43.1478	-18.8781	49.7562	-6.60843	FALSE
OG0001440	-21.3935	48.787	-22.2952	56.5905	-7.80351	FALSE
OG0001441	-4.89846	15.7969	-6.39952	24.799	-9.00211	FALSE
OG0001442	-11.1796	28.3593	-11.1592	34.3184	-5.95909	FALSE
OG0001443	-8.30519	22.6104	-8.92767	29.8553	-7.24497	FALSE
OG0001444	-21.6594	49.3188	-21.3135	54.6269	-5.30814	FALSE
OG0001445	-17.8807	41.7613	-18.4717	48.9433	-7.18198	FALSE
OG0001446	-15.7353	37.4707	-15.9729	43.9458	-6.47512	FALSE
OG0001447	-22.1109	50.2218	-26.468	64.9359	-14.7142	FALSE
OG0001448	-9.60677	25.2135	-8.84782	29.6956	-4.48211	FALSE
OG0001449	-17.0771	40.1542	-18.0264	48.0529	-7.89864	FALSE
OG0001450	-17.0571	40.1143	-17.5759	47.1519	-7.03758	FALSE
OG0001451	-10.4685	26.937	-10.6629	33.3258	-6.38887	FALSE
OG0001452	-6.1971	18.3942	-5.11275	22.2255	-3.83129	FALSE
OG0001453	-15.114	36.2281	-14.9795	41.959	-5.73094	FALSE
OG0001454	-5.97868	17.9574	-5.1445	22.289	-4.33164	FALSE
OG0001455	-7.17331	20.3466	-7.76371	27.5274	-7.1808	FALSE
OG0001456	-14.4685	34.9369	-14.3182	40.6364	-5.69944	FALSE
OG0001457	-16.5867	39.1734	-16.5267	45.0533	-5.87991	FALSE
OG0001458	-13.8851	33.7702	-13.1332	38.2664	-4.49615	FALSE
OG0001459	-2.39343	10.7869	-2.99117	17.9823	-7.19549	FALSE
OG0001460	-8.08533	22.1707	-6.98806	25.9761	-3.80546	FALSE
OG0001461	-18.2648	42.5295	-17.8978	47.7957	-5.26616	FALSE
OG0001462	-9.60677	25.2135	-8.84782	29.6956	-4.48211	FALSE
OG0001463	-21.6567	49.3134	-22.5842	57.1684	-7.85504	FALSE
OG0001464	-12.5674	31.1349	-12.3133	36.6266	-5.49174	FALSE
OG0001465	-11.2638	28.5276	-11.4099	34.8198	-6.29219	FALSE
OG0001466	-4.69856	15.3971	-3.81581	19.6316	-4.2345	FALSE
OG0001467	-7.33187	20.6637	-7.55046	27.1009	-6.43719	FALSE
OG0001468	-2.39343	10.7869	-2.99117	17.9823	-7.19549	FALSE
OG0001469	-9.09177	24.1835	-9.22772	30.4554	-6.27189	FALSE
OG0001470	-16.0251	38.0501	-15.7845	43.5689	-5.51883	FALSE
OG0001471	-7.33187	20.6637	-7.55046	27.1009	-6.43719	FALSE
OG0001472	-12.8432	31.6864	-13.0374	38.0748	-6.3884	FALSE
OG0001473	-9.72315	25.4463	-9.96898	31.938	-6.49166	FALSE
OG0001474	-19.1139	44.2279	-18.3634	48.7267	-4.49888	FALSE
OG0001475	-11.3681	28.7361	-11.3255	34.651	-5.91488	FALSE
OG0001476	-6.1971	18.3942	-5.11275	22.2255	-3.83129	FALSE
OG0001477	-6.1971	18.3942	-5.11275	22.2255	-3.83129	FALSE
OG0001478	-15.2933	36.5866	-15.1255	42.2509	-5.66431	FALSE
OG0001479	-11.0513	28.1025	-10.7712	33.5424	-5.43993	FALSE
OG0001480	-10.3382	26.6765	-10.0097	32.0194	-5.34294	FALSE
OG0001481	-6.5906	19.1812	-6.90453	25.8091	-6.62786	FALSE
OG0001482	-11.1695	28.339	-11.3766	34.7533	-6.4143	FALSE
OG0001483	-7.17331	20.3466	-7.76371	27.5274	-7.1808	FALSE
OG0001484	-4.3335	14.667	-4.70578	21.4116	-6.74456	FALSE
OG0001485	-16.034	38.0681	-17.2199	46.4398	-8.37175	FALSE
OG0001486	-14.0766	34.1531	-13.8839	39.7679	-5.61477	FALSE
OG0001487	-6.1971	18.3942	-5.11275	22.2255	-3.83129	FALSE
OG0001488	-7.75615	21.5123	-6.62977	25.2595	-3.74725	FALSE
OG0001489	-2.39343	10.7869	-2.99117	17.9823	-7.19549	FALSE
OG0001490	-11.9148	29.8296	-12.3423	36.6846	-6.85508	FALSE
OG0001491	-2.39343	10.7869	-2.99117	17.9823	-7.19549	FALSE
OG0001492	-12.4888	30.9775	-10.5432	33.0865	-2.10892	FALSE
OG0001493	-2.39343	10.7869	-2.99117	17.9823	-7.19549	FALSE
OG0001494	-2.39343	10.7869	-2.99117	17.9823	-7.19549	FALSE
OG0001495	-20.4653	46.9307	-21.1014	54.2028	-7.27206	FALSE
OG0001496	-12.0489	30.0978	-11.9946	35.9892	-5.89139	FALSE
OG0001497	-13.0677	32.1353	-12.7511	37.5021	-5.36678	FALSE
OG0001498	-2.39343	10.7869	-2.99117	17.9823	-7.19549	FALSE
OG0001499	-10.4329	26.8658	-10.7013	33.4027	-6.53689	FALSE
OG0001500	-7.47864	20.9573	-7.90073	27.8015	-6.84417	FALSE
OG0001501	-2.39343	10.7869	-2.99117	17.9823	-7.19549	FALSE
OG0001503	-16.549	39.0979	-17.0637	46.1274	-7.02945	FALSE
OG0001505	-13.6339	33.2679	-13.7962	39.5923	-6.32445	FALSE
OG0001506	-23.9491	53.8982	-23.4601	58.9203	-5.02208	FALSE
OG0001507	-4.69856	15.3971	-3.81581	19.6316	-4.2345	FALSE
OG0001508	-2.39343	10.7869	-2.99117	17.9823	-7.19549	FALSE
OG0001509	-20.59	47.1799	-19.3957	50.7914	-3.6115	FALSE
OG0001510	-16.6807	39.3614	-16.5127	45.0253	-5.66394	FALSE
OG0001511	-10.3701	26.7401	-10.0521	32.1042	-5.3641	FALSE
OG0001512	-22.5522	51.1045	-23.522	59.044	-7.93955	FALSE
OG0001513	-13.5591	33.1182	-10.716	33.432	-0.313775	FALSE
OG0001514	-15.0968	36.1936	-14.8078	41.6157	-5.42206	FALSE
OG0001515	-17.7405	41.481	-18.6852	49.3703	-7.88937	FALSE
OG0001516	-9.60677	25.2135	-8.84782	29.6956	-4.48211	FALSE
OG0001517	-2.39343	10.7869	-2.99117	17.9823	-7.19549	FALSE
OG0001518	-11.3049	28.6098	-11.6503	35.3006	-6.69079	FALSE
OG0001519	-11.366	28.7321	-11.4249	34.8497	-6.11769	FALSE
OG0001520	-7.33187	20.6637	-7.55046	27.1009	-6.43719	FALSE
OG0001521	-7.33187	20.6637	-7.55046	27.1009	-6.43719	FALSE
OG0001522	-7.17331	20.3466	-7.76371	27.5274	-7.1808	FALSE
OG0001523	-12.8256	31.6512	-12.7483	37.4966	-5.84544	FALSE
OG0001524	-7.33187	20.6637	-7.55046	27.1009	-6.43719	FALSE
OG0001525	-7.67592	21.3518	-7.8406	27.6812	-6.32936	FALSE
OG0001526	-8.72526	23.4505	-9.10077	30.2015	-6.75102	FALSE
OG0001527	-13.4277	32.8555	-13.3703	38.7406	-5.88513	FALSE
OG0001528	-6.594	19.188	-7.04538	26.0908	-6.90277	FALSE
OG0001529	-17.5792	41.1584	-17.4957	46.9915	-5.83313	FALSE
OG0001530	-15.5933	37.1865	-15.2438	42.4876	-5.30104	FALSE
OG0001531	-20.1884	46.3768	-19.6685	51.3369	-4.96007	FALSE
OG0001532	-16.5364	39.0727	-16.2155	44.4311	-5.35836	FALSE
OG0001533	-20.8373	47.6747	-19.748	51.4959	-3.82123	FALSE
OG0001534	-18.1335	42.2671	-17.2921	46.5843	-4.31717	FALSE
OG0001535	-18.6018	43.2035	-18.6097	49.2193	-6.01582	FALSE
OG0001536	-16.6067	39.2134	-16.2459	44.4917	-5.27836	FALSE
OG0001537	-11.7425	29.4851	-11.6333	35.2665	-5.78146	FALSE
OG0001538	-18.4174	42.8348	-18.0792	48.1585	-5.32372	FALSE
OG0001539	-10.9858	27.9716	-10.1932	32.3864	-4.41481	FALSE
OG0001540	-17.8447	41.6894	-17.5492	47.0985	-5.40906	FALSE
OG0001541	-16.5099	39.0198	-15.1317	42.2633	-3.24349	FALSE
OG0001542	-9.60069	25.2014	-9.76774	31.5355	-6.3341	FALSE
OG0001543	-7.21129	20.4226	-7.2032	26.4064	-5.98383	FALSE
OG0001544	-23.0868	52.1736	-24.5882	61.1764	-9.00278	FALSE
OG0001545	-9.38525	24.7705	-9.34876	30.6975	-5.92702	FALSE
OG0001546	-9.83491	25.6698	-9.57298	31.146	-5.47614	FALSE
OG0001547	-13.0447	32.0894	-12.3928	36.7856	-4.69628	FALSE
OG0001548	-11.4078	28.8156	-11.3891	34.7782	-5.96252	FALSE
OG0001549	-25.1876	56.3752	-24.8963	61.7926	-5.41741	FALSE
OG0001550	-9.80643	25.6129	-9.41232	30.8246	-5.21177	FALSE
OG0001551	-17.6415	41.283	-17.4436	46.8872	-5.6042	FALSE
OG0001552	-20.5408	47.0816	-20.2376	52.4751	-5.39351	FALSE
OG0001553	-19.5642	45.1283	-19.5229	51.0457	-5.91742	FALSE
OG0001554	-13.4433	32.8866	-13.1701	38.3402	-5.45368	FALSE
OG0001555	-15.7742	37.5484	-15.6054	43.2109	-5.66252	FALSE
OG0001556	-6.1971	18.3942	-5.11275	22.2255	-3.83129	FALSE
OG0001557	-17.5636	41.1272	-17.5984	47.1968	-6.06952	FALSE
OG0001558	-10.4685	26.937	-10.6629	33.3258	-6.38887	FALSE
OG0001559	-12.3335	30.667	-12.0965	36.193	-5.52608	FALSE
OG0001560	-15.734	37.4679	-15.7716	43.5433	-6.07537	FALSE
OG0001561	-10.3386	26.6772	-10.3095	32.6191	-5.94187	FALSE
OG0001562	-6.39022	18.7804	-7.32259	26.6452	-7.86474	FALSE
OG0001563	-21.3641	48.7281	-21.1223	54.2446	-5.51645	FALSE
OG0001564	-6.1971	18.3942	-5.11275	22.2255	-3.83129	FALSE
OG0001565	-20.4279	46.8558	-20.7546	53.5092	-6.6534	FALSE
OG0001566	-15.2097	36.4194	-15.3308	42.6615	-6.24214	FALSE
OG0001569	-10.7328	27.4657	-7.04242	26.0848	1.38081	FALSE
OG0001571	-23.1277	52.2554	-24.3655	60.731	-8.4756	FALSE
OG0001572	-16.294	38.5881	-16.1671	44.3341	-5.74608	FALSE
OG0001573	-6.1971	18.3942	-5.11275	22.2255	-3.83129	FALSE
OG0001574	-15.2022	36.4044	-14.5929	41.1858	-4.78141	FALSE
OG0001575	-11.1796	28.3593	-11.1592	34.3184	-5.95909	FALSE
OG0001576	-11.0456	28.0912	-10.8945	33.789	-5.69777	FALSE
OG0001577	-12.614	31.2279	-13.0522	38.1044	-6.87643	FALSE
OG0001578	-15.9588	37.9176	-16.0215	44.043	-6.12537	FALSE
OG0001579	-9.83491	25.6698	-9.57298	31.146	-5.47614	FALSE
OG0001580	-17.0153	40.0306	-16.866	45.732	-5.70136	FALSE
OG0001581	-9.60677	25.2135	-8.84782	29.6956	-4.48211	FALSE
OG0001582	-19.4449	44.8898	-19.8346	51.6692	-6.77945	FALSE
OG0001583	-13.6852	33.3705	-13.9598	39.9195	-6.54904	FALSE
OG0001584	-7.33187	20.6637	-7.55046	27.1009	-6.43719	FALSE
OG0001585	-7.33187	20.6637	-7.55046	27.1009	-6.43719	FALSE
OG0001586	-16.2259	38.4519	-16.0811	44.1623	-5.71041	FALSE
OG0001587	-20.5542	47.1084	-20.2864	52.5728	-5.46445	FALSE
OG0001588	-13.5636	33.1273	-13.5125	39.0251	-5.89777	FALSE
OG0001589	-7.75615	21.5123	-6.62977	25.2595	-3.74725	FALSE
OG0001590	-11.46	28.92	-11.3879	34.7758	-5.85571	FALSE
OG0001591	-10.1882	26.3764	-9.76895	31.5379	-5.16146	FALSE
OG0001592	-11.9952	29.9904	-11.5587	35.1174	-5.12702	FALSE
OG0001593	-9.60677	25.2135	-8.84782	29.6956	-4.48211	FALSE
OG0001594	-8.57406	23.1481	-9.61267	31.2253	-8.07722	FALSE
OG0001595	-2.39343	10.7869	-2.99117	17.9823	-7.19549	FALSE
OG0001596	-6.1971	18.3942	-5.11275	22.2255	-3.83129	FALSE
OG0001597	-15.4447	36.8893	-15.4077	42.8154	-5.92604	FALSE
OG0001598	-19.1033	44.2066	-17.3095	46.6191	-2.41244	FALSE
OG0001599	-14.2481	34.4962	-15.2584	42.5168	-8.02065	FALSE
OG0001600	-4.5624	15.1248	-4.74948	21.499	-6.37416	FALSE
OG0001601	-17.2052	40.4105	-17.1477	46.2954	-5.88487	FALSE
OG0001602	-2.39343	10.7869	-2.99117	17.9823	-7.19549	FALSE
OG0001603	-20.9137	47.8274	-20.9376	53.8752	-6.04781	FALSE
OG0001604	-11.9165	29.833	-10.9625	33.925	-4.09208	FALSE
OG0001605	-2.39343	10.7869	-2.99117	17.9823	-7.19549	FALSE
OG0001606	-11.1066	28.2132	-11.1779	34.3557	-6.14252	FALSE
OG0001607	-15.9464	37.8928	-15.1761	42.3523	-4.45946	FALSE
OG0001608	-9.60677	25.2135	-8.84782	29.6956	-4.48211	FALSE
OG0001609	-14.0075	34.0149	-13.6429	39.2857	-5.27081	FALSE
OG0001610	-19.1329	44.2658	-20.0462	52.0923	-7.82657	FALSE
OG0001611	-14.3629	34.7258	-14.4526	40.9051	-6.1793	FALSE
OG0001612	-17.8253	41.6507	-17.8516	47.7033	-6.0526	FALSE
OG0001613	-2.39343	10.7869	-2.99117	17.9823	-7.19549	FALSE
OG0001614	-2.39343	10.7869	-2.99117	17.9823	-7.19549	FALSE
OG0001616	-16.6867	39.3734	-15.85	43.7001	-4.32664	FALSE
OG0001619	-17.4167	40.8333	-17.2374	46.4748	-5.64148	FALSE
OG0001620	-22.5788	51.1575	-22.3172	56.6345	-5.47696	FALSE
OG0001621	-2.39343	10.7869	-2.99117	17.9823	-7.19549	FALSE
OG0001622	-14.007	34.014	-14.0204	40.0407	-6.02677	FALSE
OG0001623	-13.8195	33.639	-10.1064	32.2127	1.42627	FALSE
OG0001624	-18.409	42.818	-18.3748	48.7496	-5.93163	FALSE
OG0001625	-10.4685	26.937	-10.6629	33.3258	-6.38887	FALSE
OG0001626	-4.69856	15.3971	-3.81581	19.6316	-4.2345	FALSE
OG0001627	-6.36775	18.7355	-6.99061	25.9812	-7.24573	FALSE
OG0001628	-2.39343	10.7869	-2.99117	17.9823	-7.19549	FALSE
OG0001629	-23.6688	53.3376	-23.8665	59.733	-6.39542	FALSE
OG0001630	-21.4416	48.8832	-21.4397	54.8793	-5.99614	FALSE
OG0001631	-19.7875	45.575	-19.561	51.122	-5.54695	FALSE
OG0001632	-15.945	37.89	-15.5659	43.1317	-5.24174	FALSE
OG0001633	-7.33187	20.6637	-7.55046	27.1009	-6.43719	FALSE
OG0001634	-2.39343	10.7869	-2.99117	17.9823	-7.19549	FALSE
OG0001635	-22.9363	51.8726	-26.2868	64.5737	-12.701	FALSE
OG0001636	-8.5293	23.0586	-8.64667	29.2933	-6.23475	FALSE
[truncated: 8,609 more rows]

## Sheet: Genes and OGs dynamics per bran
BadiRate branch IDs	Branches of interest	Expanded OGs	Contracted OGs	Gene gains	Gene losses
[truncated: 80 more rows]
