# Supplementary material for: Genomic exaptation and convergent evolution paved the way to independent subterranean colonization across beetle lineages
Source: Research Square preprint supplement (doi:10.21203/rs.3.rs-2254102/v1), 2022-11-17
Supplement: Supplementary file 2 [file e3a651e1a4375f6f39328ad5.xlsx]

## Sheet: Full 1
Orthogroup	AANG1	ABIS2	AGLA1	AINS1	APLA1	BOVA2	BRUG1	BSLA1	BTRI1	BZAR1	CFRI1	CFUL1	CJAP1	CLAE1	CNIG1	CNIP1	DPON1	GMAR2	HMEG1	HRED1	LAMA1	LCUE1	LHIN1	LHOC1	LNIG1	LPAL1	MDEB1	MMOL1	NGUT3	NVES1	OSCH1	OTAU1	PBRE1	PCAN1	PMAC3	PNIG1	PPYR3	PURG1	SLON1	TCAS1	TFER2	Total OGs	Best-fitting model ModelFinder
OG0000000	28	28	2	19	5	175	77	90	42	136	14	5	517	16	2	143	0	90	40	5	4	16	17	12	11	41	8	0	101	2	81	2	18	79	85	77	3	17	131	0	72	2211	JTT+F+R10
OG0000001	12	67	2	19	6	109	38	19	27	117	20	2	105	20	2	126	8	38	24	7	33	26	32	18	9	142	11	2	542	3	53	3	17	23	51	18	6	11	24	2	58	1852	JTT+F+R9
OG0000002	16	88	50	23	23	27	30	24	31	28	24	17	26	30	26	19	27	22	35	30	27	25	22	15	20	22	49	6	26	8	29	28	20	27	22	40	30	25	24	40	23	1124	LG+C40+F+G
OG0000003	18	40	33	41	31	20	28	17	17	19	28	17	40	45	13	77	18	34	41	21	31	17	14	23	31	34	35	1	36	16	19	22	21	23	27	33	27	19	21	25	22	1095	LG+C30+F+G
OG0000004	13	27	35	24	40	31	34	31	27	38	16	24	24	19	41	25	30	17	40	28	16	9	8	17	33	13	22	25	19	24	18	20	21	36	6	17	37	25	23	22	27	1002	LG+C60+F+G
OG0000005	31	26	30	14	18	26	46	26	25	25	13	28	13	18	18	18	26	15	42	32	11	11	25	24	21	16	9	8	17	11	27	13	25	29	13	14	42	19	22	37	18	902	LG+C50+F+G
OG0000006	4	11	16	43	10	2	0	7	1	5	1	0	176	1	11	2	2	19	4	2	7	10	6	2	0	13	8	41	187	9	8	0	38	2	91	39	1	0	0	4	0	783	JTT+F+R4
OG0000007	21	28	21	8	11	27	35	24	25	37	13	27	9	17	10	24	9	5	59	20	9	16	6	20	13	8	10	1	11	18	23	37	24	26	7	16	11	20	17	22	23	768	LG+C60+F+G
OG0000008	10	19	21	7	11	52	45	25	2	31	3	40	28	13	23	43	1	34	28	5	1	18	5	7	4	20	3	26	13	0	7	22	21	11	18	35	36	15	31	10	11	755	LG+C60+F+G
OG0000009	15	14	23	8	30	22	27	20	44	28	16	17	32	7	7	26	17	17	19	4	18	13	15	18	16	4	9	2	13	28	18	21	19	21	5	9	40	24	22	9	19	736	LG+C60+F+G
OG0000010	22	8	5	10	5	44	26	29	22	35	4	31	24	21	2	31	0	7	23	4	1	3	1	14	10	30	17	0	39	17	30	0	30	19	34	4	2	41	28	0	40	713	LG+C50+F+G
OG0000011	27	16	2	7	1	48	87	33	1	42	1	22	82	3	12	11	0	19	32	0	3	16	5	14	3	19	0	0	36	0	19	4	5	15	14	21	14	10	34	3	16	697	LG+C50+F+G
OG0000012	24	2	13	6	20	20	50	35	6	13	3	13	23	0	3	49	14	11	44	23	1	1	0	15	15	8	0	39	7	12	34	15	24	42	19	1	16	17	28	14	13	693	LG+C40+F+G
OG0000013	12	25	18	10	32	27	26	21	20	29	6	16	9	8	12	16	13	8	38	9	8	2	5	15	12	12	7	3	7	14	23	37	20	22	6	12	9	21	23	13	23	649	LG+C60+F+G
OG0000014	11	5	57	10	38	16	13	8	7	8	5	5	5	3	6	21	42	11	4	11	4	4	2	8	7	17	25	9	21	35	7	54	14	15	12	8	22	17	15	36	9	627	LG+C50+F+G
OG0000015	3	0	0	0	1	112	54	4	30	183	0	0	3	1	0	0	0	0	1	1	0	0	0	3	2	0	1	0	0	0	3	0	2	41	0	0	0	13	75	0	88	621	JTT+F+R7
OG0000016	12	30	24	11	6	16	20	13	24	24	9	10	13	19	9	8	7	13	23	10	11	14	14	9	21	13	11	4	12	13	19	8	12	18	12	10	25	20	20	12	13	592	LG+C60+F+G
OG0000017	12	26	22	6	22	19	19	16	19	18	8	17	6	7	18	22	12	5	16	12	7	11	8	14	12	7	16	6	8	18	20	17	11	15	7	9	18	13	13	28	12	572	LG+C40+F+G
OG0000018	6	15	26	2	23	14	13	18	0	38	0	14	21	14	1	11	4	27	68	3	7	19	2	6	2	19	5	13	1	0	3	50	7	9	4	19	53	6	20	4	4	571	LG+C60+F+G
OG0000019	10	27	9	9	5	19	21	12	26	19	8	21	12	14	21	22	15	8	24	2	12	7	4	9	5	7	7	3	10	37	11	9	7	16	4	12	27	16	12	19	13	551	LG+C60+F+G
OG0000020	8	4	22	7	26	14	12	15	7	12	5	13	8	9	8	8	29	6	7	16	3	2	4	13	12	15	10	24	8	24	16	23	15	13	7	5	22	16	19	23	12	522	JTT+F+R10
OG0000021	12	10	6	8	8	17	23	13	14	16	10	13	12	7	13	19	4	14	19	7	7	8	8	16	13	6	9	13	8	16	12	17	12	13	8	8	27	15	14	17	14	506	LG+C60+F+G
OG0000022	5	3	35	11	24	24	35	6	1	24	0	19	19	5	5	24	0	2	4	1	0	3	5	4	6	6	1	0	10	0	14	22	2	4	7	6	63	23	12	12	8	455	LG+C50+F+G
OG0000023	9	27	7	10	9	12	11	11	14	9	9	8	14	10	6	8	16	8	25	7	15	15	13	9	10	15	10	10	11	7	10	12	8	10	9	12	8	11	11	7	9	452	LG+C50+F+G
OG0000024	3	3	33	4	2	7	6	6	0	8	2	1	54	1	1	11	14	8	5	2	6	7	4	3	3	12	7	42	10	3	3	66	11	1	19	22	43	2	6	7	0	448	LG+C40+F+G
OG0000025	4	11	1	2	1	2	2	10	4	1	8	5	1	9	5	4	2	4	11	6	258	7	13	8	1	6	4	2	9	2	2	2	5	5	2	13	1	2	1	2	7	445	LG+C40+F+G
OG0000026	7	9	16	10	6	9	9	9	10	9	7	10	12	12	18	9	14	14	26	9	5	6	6	7	18	8	7	12	14	17	6	21	9	8	12	13	16	9	7	8	9	443	LG+C60+F+G
OG0000027	12	20	13	7	15	12	11	12	5	13	4	12	9	7	8	11	13	7	12	13	4	3	1	10	15	10	5	16	14	15	11	12	13	11	11	10	13	13	13	15	10	441	JTT+F+R10
OG0000028	6	40	11	7	5	8	11	7	9	8	11	6	20	10	5	9	4	12	23	9	15	11	7	7	8	10	5	4	7	36	7	15	6	8	9	12	7	9	7	13	8	432	LG+C50+F+G
OG0000029	12	16	15	5	13	10	12	10	4	12	6	10	7	16	16	10	10	7	23	7	7	7	11	12	11	8	5	23	7	9	10	10	9	13	6	6	10	13	10	11	9	428	LG+C40+F+G
OG0000030	9	5	31	4	12	19	17	11	19	16	2	11	3	7	3	7	14	2	20	3	3	2	2	11	10	2	13	4	3	8	12	31	9	18	2	3	6	17	14	17	14	416	LG+C50+F+G
OG0000031	12	10	12	4	13	7	13	11	1	9	3	11	7	10	11	7	13	4	16	11	4	7	4	6	8	9	7	24	11	14	13	14	11	15	9	9	11	13	11	14	9	408	LG+C40+F+G
OG0000032	8	8	37	12	21	9	11	5	5	7	8	5	10	4	6	10	14	9	9	10	4	7	5	5	5	8	10	3	11	40	5	11	5	11	10	10	5	11	11	15	8	408	LG+C50+F+G
OG0000033	20	0	2	2	0	29	54	29	15	30	2	2	0	0	1	0	2	1	2	1	0	1	2	22	3	0	1	0	1	0	20	0	22	51	1	1	0	17	32	2	36	404	JTT+F+R10
OG0000034	4	16	23	6	22	11	12	6	12	16	7	6	9	8	17	16	17	5	15	7	6	8	5	3	4	8	13	2	8	12	8	18	5	7	6	8	1	12	12	13	8	402	LG+C50+F+G
OG0000035	12	16	7	10	12	8	8	9	8	10	8	10	9	15	9	14	10	10	13	8	8	10	7	9	10	8	8	11	9	8	9	7	8	10	13	11	8	9	9	12	10	400	JTT+F+R7
OG0000036	9	11	9	6	8	9	9	11	12	8	6	8	10	13	6	12	9	5	17	13	5	8	8	9	10	9	5	19	11	17	9	8	10	10	8	6	9	8	9	10	17	396	LG+C40+F+G
OG0000037	4	1	28	5	13	10	4	6	9	12	4	4	7	7	7	17	9	10	27	4	12	18	19	3	7	10	10	16	9	16	6	11	4	8	13	4	19	9	4	7	3	396	LG+C50+F+G
OG0000038	7	1	1	0	0	83	43	36	8	39	0	0	1	1	1	2	0	0	0	1	0	0	1	8	0	0	0	0	0	0	18	0	6	28	0	1	0	17	46	0	44	393	JTT+F+R6
OG0000039	10	7	11	8	4	9	10	12	12	10	11	7	9	9	8	7	8	9	19	18	11	4	5	7	9	8	9	10	10	11	9	9	12	9	6	6	14	11	11	13	10	392	LG+C40+F+G
OG0000040	6	9	12	3	10	11	15	9	13	10	10	16	8	10	15	14	2	5	16	6	11	9	8	10	14	7	6	4	8	13	10	11	6	10	4	5	20	9	8	7	7	387	LG+C50+F+G
OG0000041	0	16	15	7	0	0	0	0	0	0	3	0	34	3	2	1	13	1	3	0	7	43	1	0	0	24	6	13	61	0	0	0	0	1	73	57	1	0	0	0	1	386	JTT+F+R5
OG0000042	11	5	7	5	10	6	12	13	6	15	0	11	5	11	8	11	12	4	16	14	0	4	4	9	9	13	9	23	8	11	9	8	10	13	9	3	13	12	12	9	10	380	LG+C40+F+G
OG0000043	10	12	7	5	6	4	9	13	0	8	3	12	2	5	7	6	9	45	13	4	1	5	4	8	7	7	4	12	18	52	11	8	11	10	3	9	4	5	6	7	4	376	LG+C40+F+G
OG0000044	4	0	34	0	4	11	4	2	2	6	4	4	9	5	8	3	0	6	5	0	2	2	0	1	5	3	4	1	4	2	0	79	10	3	4	9	111	6	5	1	1	364	LG+C50+F+G
OG0000045	7	12	11	5	15	14	7	13	3	10	6	8	6	2	5	4	9	1	7	9	2	7	2	5	11	11	8	13	11	14	13	14	9	10	11	7	8	18	16	14	6	364	JTT+F+R9
OG0000046	9	9	16	7	5	13	13	10	11	11	5	12	10	5	7	2	8	5	7	4	4	5	7	11	7	4	2	1	3	27	9	20	11	14	4	4	4	14	14	16	13	363	LG+C40+F+G
OG0000047	7	14	9	8	9	11	9	8	2	10	1	7	4	4	7	6	17	4	10	11	2	2	1	8	14	11	8	14	13	13	10	11	11	13	10	10	14	12	11	7	8	361	LG+C40+F+G
OG0000048	6	9	13	5	17	11	10	9	11	10	9	12	5	8	11	6	11	4	22	9	8	8	10	6	7	4	9	1	4	6	9	13	7	8	5	5	9	8	9	9	8	351	LG+C40+F+G
OG0000049	6	4	17	11	12	11	12	13	9	11	5	12	16	3	17	8	8	5	9	4	6	7	7	6	3	0	5	1	7	4	7	35	6	10	7	4	1	11	8	14	6	348	LG+C40+F+G
OG0000050	10	15	6	4	4	15	11	5	16	12	6	19	5	2	3	18	14	3	10	25	3	2	2	5	9	3	6	3	5	6	8	2	6	6	5	7	15	16	7	18	6	343	LG+C50+F+G
OG0000051	18	3	15	12	6	5	2	14	0	5	0	1	37	0	0	1	1	1	4	13	8	0	0	10	0	6	2	9	12	6	8	57	22	2	17	23	7	1	5	5	2	340	LG+C40+F+G
OG0000052	6	5	49	3	33	5	9	5	10	9	4	5	3	5	3	14	24	3	6	7	3	3	2	4	6	4	15	0	4	6	6	18	4	7	2	5	9	7	7	15	5	340	LG+C60+F+G
OG0000053	6	20	3	7	3	9	7	8	6	9	1	7	5	4	8	3	5	5	24	8	12	5	9	6	8	10	3	1	12	12	6	13	6	7	10	15	23	9	9	8	8	340	LG+C50+F+G
OG0000054	3	9	53	2	1	9	9	5	2	9	7	2	2	4	1	1	8	5	7	1	8	3	2	3	4	7	1	6	6	3	1	35	10	0	4	7	82	6	2	7	1	338	LG+C60+F+G
OG0000055	10	5	9	1	8	7	12	17	10	12	2	11	2	3	7	14	9	1	17	10	1	2	2	9	8	5	5	6	12	10	7	12	17	10	7	5	6	12	10	11	7	331	JTT+F+R7
OG0000056	4	8	27	4	9	15	16	5	10	9	7	3	12	11	4	0	7	6	22	9	10	4	4	4	8	5	6	2	4	3	4	3	4	9	11	8	5	8	17	15	8	330	JTT+F+R6
OG0000057	7	2	27	1	15	11	14	11	16	10	4	9	3	2	0	35	5	2	9	0	0	0	1	9	0	0	10	0	0	15	9	8	8	15	0	3	34	6	11	5	11	328	LG+C50+F+G
OG0000058	4	2	27	2	31	8	9	8	11	13	7	14	12	6	8	9	17	0	8	4	2	4	8	5	8	2	3	0	6	5	6	20	5	9	6	6	4	9	6	7	7	328	LG+C40+F+G
OG0000059	12	6	6	1	2	13	15	16	11	13	3	10	10	3	0	9	2	2	29	4	6	9	4	12	0	2	0	0	5	15	12	28	6	9	1	3	4	14	11	4	13	325	WAG+F+R6
OG0000060	4	6	15	2	10	10	8	6	7	8	2	6	5	4	10	45	8	2	7	5	2	4	3	6	3	4	8	2	2	9	6	9	7	9	3	5	33	10	8	11	9	323	LG+C50+F+G
OG0000061	0	10	0	2	0	0	0	0	0	0	0	0	6	0	1	0	13	0	1	1	4	35	6	0	0	25	1	0	31	0	0	0	0	0	111	71	3	0	1	0	0	322	JTT+F+R4
OG0000062	6	22	5	2	1	19	18	8	12	18	7	15	4	2	6	8	2	0	20	2	5	2	4	7	2	4	1	0	9	13	13	0	9	17	5	8	2	19	10	6	8	321	LG+C40+F+G
OG0000063	6	20	8	4	10	2	6	2	4	5	5	9	2	3	11	41	10	4	15	3	4	5	5	3	10	2	23	2	2	8	4	33	2	5	2	4	12	3	4	13	3	319	LG+C60+F+G
OG0000064	6	9	11	3	13	10	8	12	3	10	5	10	4	5	6	9	14	1	8	8	2	3	2	3	10	5	6	10	9	12	8	14	8	7	6	5	12	11	10	11	9	318	JTT+F+R6
OG0000065	8	12	10	6	7	6	7	6	6	7	8	6	10	8	6	10	8	5	12	5	14	14	10	4	6	6	5	3	13	5	7	11	7	7	7	6	8	6	8	7	6	313	LG+C40+F+G
OG0000066	4	18	6	5	2	6	9	9	8	11	13	10	12	2	4	14	4	12	13	5	12	9	9	4	2	10	11	1	10	4	5	6	5	8	14	11	1	5	6	7	5	312	LG+C40+F+G
OG0000067	1	5	53	1	18	4	5	1	1	2	0	0	21	2	0	6	1	6	4	0	1	8	1	0	0	8	2	0	8	0	0	21	1	0	4	9	114	0	0	1	0	309	LG+C60+F+G
OG0000068	5	6	11	7	8	5	9	6	6	9	7	3	7	3	2	7	11	8	18	3	4	5	3	4	3	4	12	1	4	17	9	14	6	10	5	2	33	8	10	6	7	308	LG+C40+F+G
OG0000069	10	18	4	6	5	4	10	14	6	4	4	9	5	6	8	11	4	8	19	7	2	11	10	7	6	10	3	4	6	4	7	6	8	13	11	8	4	7	4	4	9	306	LG+C50+F+G
OG0000070	8	14	5	5	6	5	7	6	10	6	5	8	8	6	8	6	8	5	19	9	1	6	6	6	9	10	5	12	15	8	9	5	8	8	8	7	5	7	5	5	6	305	LG+C40+F+G
OG0000071	8	12	11	4	9	8	7	6	10	6	9	11	7	17	5	6	4	13	11	5	3	3	7	8	5	6	3	6	7	4	6	4	7	8	10	4	9	7	7	11	6	300	LG+C50+F+G
OG0000072	9	8	10	3	7	7	7	9	8	7	6	10	4	8	8	9	11	4	4	3	8	3	2	7	5	3	10	3	4	9	9	15	10	6	2	3	11	10	9	16	9	296	LG+C50+F+G
OG0000073	6	19	7	7	1	16	12	7	8	12	8	9	9	1	3	7	4	7	15	1	7	8	3	5	7	10	1	0	10	10	8	7	7	9	4	6	1	11	10	3	9	295	LG+C50+F+G
OG0000074	2	1	0	14	1	6	7	7	13	9	4	4	33	4	4	1	0	19	6	7	14	6	16	2	9	2	2	2	3	24	6	8	4	9	3	3	21	6	4	5	4	295	LG+C60+F+G
OG0000075	9	3	5	8	7	8	15	10	2	5	2	6	9	2	6	8	9	2	6	5	5	5	4	7	7	7	12	7	12	8	9	9	8	13	8	7	6	9	7	12	5	294	LG+C40+F+G
OG0000076	5	5	4	4	5	2	13	7	9	10	3	4	4	6	4	12	8	2	38	25	3	3	1	3	5	3	1	0	3	12	10	16	8	12	3	2	4	7	14	9	5	294	WAG+F+R7
OG0000077	7	33	8	7	3	5	2	10	3	14	6	7	7	7	10	10	4	12	15	2	15	17	14	10	10	3	1	3	4	2	12	1	10	5	3	4	1	2	1	1	1	292	LG+C40+F+G
OG0000078	7	13	0	5	1	19	28	8	0	8	1	2	16	1	4	4	1	32	14	0	2	2	1	2	2	14	2	1	28	8	6	0	2	8	10	15	1	3	10	4	6	291	LG+C50+F+G
OG0000079	9	6	4	5	5	12	14	13	10	15	0	7	7	2	10	5	4	6	9	10	5	3	3	7	9	4	4	7	5	8	9	3	9	14	3	3	7	12	9	5	7	289	LG+C50+F+G
OG0000080	7	6	9	5	10	7	9	9	14	12	4	7	5	2	6	6	3	7	16	5	4	6	7	8	4	5	9	7	6	5	9	4	6	10	8	4	2	12	9	5	8	287	LG+C60+F+G
OG0000081	18	2	0	1	0	23	17	13	0	11	0	4	39	1	0	2	0	12	22	0	2	8	3	3	3	6	0	0	19	0	7	0	4	2	6	30	8	4	10	2	5	287	LG+C40+F+G
OG0000082	5	7	17	4	12	6	12	12	9	13	6	2	9	4	9	9	7	3	10	11	2	5	3	6	4	1	3	2	9	4	8	12	8	7	5	3	13	8	8	6	2	286	LG+C50+F+G
OG0000083	5	9	9	6	12	9	8	6	2	7	0	10	6	3	6	4	12	5	5	7	1	0	1	3	6	5	7	16	12	11	6	10	8	11	7	6	9	11	10	8	6	285	LG+C40+F+G
OG0000084	6	2	35	3	5	9	8	16	0	2	0	5	41	0	17	6	9	8	7	1	0	7	0	2	1	2	0	0	13	0	9	27	0	0	18	15	0	0	1	2	0	277	WAG+F+R5
OG0000085	7	7	5	6	5	6	8	6	7	7	6	6	7	9	6	8	6	8	10	5	5	5	10	6	8	7	7	11	7	6	7	6	7	6	7	8	6	5	5	7	7	278	LG+C30+F+G
OG0000086	25	3	0	6	0	12	5	16	0	7	1	16	17	0	0	4	1	1	2	1	0	12	4	19	0	1	0	1	21	0	22	0	18	8	8	0	0	15	10	0	21	277	LG+C60+F+G
OG0000087	9	8	8	3	5	6	8	10	9	7	7	7	7	4	6	6	7	6	13	9	2	2	8	8	5	7	6	3	9	5	8	8	11	8	5	7	5	8	6	4	7	277	JTT+F+R7
OG0000088	9	13	6	3	9	10	9	11	12	11	3	11	2	6	9	3	4	1	16	4	6	1	3	8	7	2	6	0	4	3	7	7	8	7	3	5	16	8	6	10	6	275	LG+C50+F+G
OG0000089	5	8	7	6	11	5	5	6	7	7	5	5	6	8	8	5	10	6	12	9	7	6	3	5	8	5	7	7	7	6	6	6	7	6	5	5	10	6	6	9	5	273	LG+C30+F+G
OG0000090	4	12	13	7	8	6	6	5	7	7	5	3	5	7	11	3	4	6	14	5	8	8	5	5	4	3	9	3	9	4	4	15	3	5	3	9	6	7	7	12	5	272	LG+C60+F+G
OG0000091	5	3	9	4	11	12	7	10	4	5	3	6	4	4	5	7	9	3	9	10	2	2	5	4	6	6	6	8	7	10	6	9	10	6	4	4	10	9	11	11	5	271	JTT+F+R6
OG0000092	2	5	9	3	4	5	7	1	2	4	7	10	13	1	27	3	3	18	23	3	2	1	2	1	7	7	3	18	10	4	0	7	1	2	5	12	20	6	2	6	0	266	LG+C40+F+G
OG0000093	5	10	9	6	13	6	6	6	7	6	8	7	6	6	3	7	7	7	11	6	5	3	6	6	8	3	7	4	3	6	6	5	5	7	4	8	6	6	7	13	6	266	LG+C50+F+G
OG0000094	4	2	25	1	0	16	22	8	19	23	1	10	0	1	1	2	11	0	0	1	2	0	0	3	0	1	1	1	2	36	9	1	3	16	0	1	1	14	15	1	11	265	WAG+F+R6
OG0000095	4	5	4	7	13	6	5	5	5	7	4	6	4	5	4	12	7	8	16	4	12	7	5	3	6	2	3	2	8	8	6	13	6	5	8	2	12	6	8	4	5	262	LG+C40+F+G
OG0000096	1	1	26	14	0	0	1	4	1	0	0	0	45	2	5	3	0	2	8	0	0	10	1	0	0	3	6	25	8	2	7	42	15	0	22	2	0	3	0	3	0	262	LG+C20+F+G
OG0000097	4	5	16	9	13	4	6	7	2	6	9	4	6	4	2	6	0	8	9	2	4	5	3	4	1	5	4	6	13	8	2	40	11	2	6	5	4	5	3	4	4	261	LG+C40+F+G
OG0000098	4	3	6	5	6	11	7	7	2	7	1	9	5	5	3	7	6	2	10	6	2	3	3	10	10	4	7	8	6	6	12	8	8	10	5	6	6	7	9	8	9	259	JTT+F+R7
OG0000099	17	0	2	0	1	19	23	14	20	14	0	15	1	0	1	0	5	0	3	1	0	0	0	17	1	0	0	0	0	1	16	1	14	17	0	0	1	15	19	1	18	257	JTT+F+R8
OG0000100	7	23	1	3	4	2	1	2	14	1	13	2	2	8	21	2	2	5	25	5	16	4	8	2	13	5	12	3	6	1	2	14	7	4	3	4	1	2	2	1	2	255	LG+C60+F+G
OG0000101	5	7	9	3	8	6	7	6	3	8	1	7	4	6	2	9	5	1	8	10	1	4	4	8	7	3	1	16	10	11	4	5	7	9	5	6	9	10	6	5	7	253	LG+C40+F+G
OG0000102	3	17	13	4	0	1	0	2	0	0	3	0	24	8	1	2	19	0	4	0	7	24	1	1	0	31	0	6	24	0	1	1	0	1	16	38	0	0	0	0	0	252	LG+C30+F+G
OG0000103	6	3	15	0	2	19	10	11	1	17	2	17	5	1	16	11	2	8	19	0	0	3	1	5	3	6	2	9	1	0	4	1	6	4	5	8	8	5	10	2	4	252	LG+C40+F+G
OG0000104	3	8	7	2	4	5	5	5	4	6	3	7	4	3	14	8	8	2	17	1	2	2	2	2	7	5	13	2	9	16	3	24	5	4	2	3	8	4	5	13	4	251	LG+C60+F+G
OG0000105	4	21	5	4	4	5	5	5	7	4	3	4	2	10	2	2	2	1	18	3	4	7	8	4	3	7	5	0	8	18	5	12	6	8	3	3	13	4	6	6	6	247	LG+C60+F+G
OG0000106	6	6	10	4	19	6	7	5	7	7	6	4	4	6	8	6	3	5	10	7	5	3	2	6	2	4	9	2	5	3	7	4	7	7	6	5	6	5	7	8	7	246	LG+C50+F+G
OG0000107	5	11	6	9	7	5	3	6	5	4	4	5	10	2	7	7	6	5	6	14	4	5	8	3	7	6	3	7	7	5	3	5	6	4	7	9	6	3	4	8	6	243	LG+C40+F+G
OG0000108	7	4	6	5	5	6	8	3	0	9	0	12	4	2	8	5	9	2	10	7	0	1	1	5	8	5	6	5	12	6	5	5	8	15	5	3	7	7	8	6	12	242	LG+C40+F+G
OG0000109	4	13	5	6	5	2	4	6	5	5	6	6	9	11	7	3	7	13	8	4	8	10	11	3	4	4	4	1	10	6	4	6	3	4	9	8	0	3	6	4	4	241	LG4X
OG0000110	5	2	27	0	13	0	1	4	0	3	0	3	1	1	0	2	10	1	2	3	0	1	0	2	4	3	5	0	5	23	1	34	5	0	8	3	17	3	9	38	1	240	LG+C40+F+G
OG0000111	8	3	1	2	5	2	2	2	11	2	5	2	1	5	18	1	2	16	27	1	7	2	15	2	24	4	5	6	8	2	2	2	11	4	4	3	1	2	2	15	1	238	LG+C60+F+G
OG0000112	8	11	2	3	21	2	2	5	4	7	2	3	1	9	7	6	2	5	9	3	2	7	4	10	4	8	1	14	5	22	3	4	6	4	9	4	4	2	2	9	3	239	LG+C40+F+G
OG0000113	7	7	7	1	0	8	9	10	6	12	0	5	1	5	6	27	2	0	12	2	4	3	2	4	13	3	4	13	1	5	7	2	7	8	1	1	6	10	7	5	6	239	LG+C50+F+G
OG0000114	8	5	7	2	8	11	12	11	9	14	1	5	9	4	3	1	9	1	14	7	0	2	0	5	3	2	1	1	4	4	7	6	6	9	3	1	4	10	12	5	10	236	LG+C50+F+G
OG0000115	8	2	5	2	7	9	11	9	11	9	2	4	1	1	0	4	10	3	20	2	1	1	2	9	3	1	10	0	2	6	11	5	10	11	0	1	10	9	9	8	7	236	LG+C50+F+G
OG0000116	5	4	9	4	12	6	8	7	3	7	1	2	6	5	4	8	8	2	7	7	0	1	0	4	7	3	7	9	5	14	4	11	10	8	2	0	8	7	8	8	5	236	JTT+F+I+G4
OG0000117	6	9	8	4	5	6	6	6	6	5	5	5	9	5	3	5	11	4	5	2	7	5	3	5	6	3	8	0	4	3	6	17	5	6	6	4	10	5	5	7	5	235	LG+C40+F+G
OG0000118	0	7	0	6	16	1	2	5	0	0	3	2	35	3	0	4	5	0	3	1	0	22	3	0	3	22	1	4	26	0	1	3	1	3	23	27	2	0	0	0	1	235	LG+C20+F+G
OG0000119	6	9	6	4	5	4	7	8	2	6	1	8	5	4	5	8	7	1	14	5	2	4	4	8	6	8	5	9	8	4	5	4	7	5	10	5	3	5	7	4	6	234	LG+C40+F+G
OG0000120	4	13	6	4	10	5	7	8	4	8	2	7	4	4	4	6	6	4	7	8	3	4	1	5	7	3	3	4	5	6	6	6	8	8	4	5	8	7	6	6	6	232	LG+C60+F+G
OG0000121	3	3	2	3	4	4	9	5	0	13	1	6	4	3	6	9	3	4	10	5	0	2	5	10	5	6	2	13	9	4	6	10	9	12	3	8	3	9	7	9	3	232	JTT+F+G4
OG0000122	1	1	22	4	0	4	8	1	1	4	6	1	3	2	11	2	2	3	8	1	1	1	0	1	7	4	2	25	6	0	2	7	1	2	3	6	66	4	2	4	2	231	LG+C40+F+G
OG0000123	7	8	4	3	5	4	7	6	7	5	4	10	2	8	4	6	4	2	11	8	2	8	4	8	8	3	2	10	6	5	6	4	10	7	3	6	3	4	4	5	7	230	LG+C40+F+G
OG0000124	5	6	8	5	9	8	4	5	3	5	0	1	5	3	1	5	12	5	7	7	3	4	3	2	2	4	4	17	9	10	4	9	5	4	5	6	9	8	9	5	3	229	LG+C40+F+G
OG0000125	3	5	34	2	0	4	7	0	4	6	0	0	1	2	4	0	1	0	1	0	6	3	7	0	8	10	0	0	8	0	2	9	0	7	7	7	41	4	5	26	5	229	LG+C30+F+G
OG0000126	7	2	20	0	1	12	14	7	8	10	2	0	16	0	2	1	2	4	2	1	4	3	5	4	2	7	3	0	3	0	6	14	5	4	0	3	34	4	4	5	5	226	LG+C20+F+G
OG0000127	2	13	2	5	2	3	2	6	15	3	4	2	2	8	11	4	7	3	18	2	14	9	10	3	3	5	2	7	3	8	3	5	4	2	9	8	2	3	2	4	3	223	LG+C40+F+G
OG0000128	4	3	16	0	5	6	6	7	0	18	0	5	11	1	2	2	3	4	20	1	1	6	0	1	2	6	1	10	0	0	1	26	2	6	1	7	15	6	10	1	2	218	LG+C40+F+G
OG0000129	4	2	5	5	7	3	5	6	5	6	4	6	3	8	6	4	5	5	8	5	3	8	6	5	3	2	4	7	8	3	5	13	5	6	10	3	6	4	6	4	5	218	LG+C20+F+G
OG0000130	5	3	7	6	4	7	6	6	3	4	1	1	5	2	2	9	7	3	7	7	2	2	3	3	5	3	7	0	5	32	5	10	5	6	3	3	3	7	8	4	6	217	LG+C20+F+G
OG0000131	5	6	5	6	5	4	5	7	5	5	6	2	9	4	4	4	5	4	9	7	3	5	4	4	5	3	2	10	7	7	6	5	7	8	7	3	3	6	5	8	2	217	LG+C40+F+G
OG0000132	7	7	2	10	2	1	2	14	5	4	2	2	22	2	9	11	2	0	6	2	0	7	1	4	1	12	1	5	22	1	2	1	7	2	12	7	2	2	1	1	8	211	LG+C60+F+G
OG0000133	4	2	16	6	2	2	5	1	0	4	1	0	17	0	2	11	0	4	0	1	2	1	0	2	0	2	15	3	4	2	4	38	5	1	4	17	29	2	2	2	1	214	LG+C40+F+G
OG0000134	4	2	12	4	10	4	4	4	3	5	3	3	2	6	9	20	9	6	12	6	2	3	1	4	6	2	5	2	2	8	3	7	2	4	2	3	3	3	3	16	4	213	LG+C20+F+G
OG0000135	0	2	4	2	2	3	3	4	8	7	2	14	3	3	1	76	3	2	10	6	0	1	2	2	3	3	7	0	2	0	3	4	5	3	2	2	3	2	5	1	7	212	WAG+F+R5
OG0000136	6	4	1	4	7	6	5	5	5	5	5	7	4	8	4	3	6	2	9	5	5	2	2	5	10	3	9	1	5	6	6	3	6	5	4	5	14	3	5	5	6	211	LG+C40+F+G
OG0000137	2	5	10	3	0	4	1	3	2	2	8	6	7	1	4	7	1	20	11	2	3	3	2	0	4	10	2	0	11	3	1	24	0	0	7	7	29	2	1	2	0	210	LG+C20+F+G
OG0000138	4	4	32	2	6	7	3	6	6	6	3	7	1	6	6	4	3	2	4	3	2	2	1	6	2	2	2	1	3	2	8	10	5	5	1	1	16	5	5	6	4	204	LG+C60+F+G
OG0000139	6	2	3	3	5	6	5	5	4	6	2	8	4	2	3	2	8	0	3	7	2	1	4	8	4	5	4	2	5	3	9	10	7	7	6	5	3	9	8	9	9	204	LG+C40+F+G
OG0000140	6	7	5	5	5	3	4	5	8	6	5	3	3	4	4	3	5	4	13	5	3	6	5	3	3	5	6	4	3	4	6	5	7	10	4	3	4	5	8	4	3	204	LG+C40+F+G
OG0000141	4	2	2	2	8	8	11	11	0	8	0	5	3	4	11	6	0	6	11	3	0	6	2	3	5	3	7	23	3	1	2	1	8	1	2	1	3	9	11	3	2	201	LG+C30+F+G
OG0000142	4	8	8	6	2	3	2	2	1	2	0	11	8	3	10	10	6	3	14	3	0	12	11	4	3	5	2	7	6	2	7	1	8	2	7	3	2	2	2	2	9	203	LG+C40+F+G
OG0000143	3	5	8	1	3	4	5	3	5	2	3	2	3	6	8	10	3	9	15	13	3	6	4	2	6	4	3	5	2	2	2	13	2	2	5	5	8	3	2	11	2	203	LG+C40+F+G
OG0000144	4	8	8	2	7	6	7	6	5	6	4	3	3	1	6	5	6	3	6	6	2	6	5	2	6	4	7	5	4	3	5	5	6	7	4	3	7	5	6	5	4	203	LG+C60+F+G
OG0000145	0	32	0	0	0	0	1	0	0	0	0	0	0	1	0	0	0	0	0	0	33	11	12	0	0	39	1	0	73	0	0	0	0	0	0	0	0	0	0	0	0	203	JTT+F+R5
OG0000146	9	3	6	1	4	2	5	10	0	10	0	12	4	0	2	9	3	0	6	2	1	8	2	5	3	3	0	11	11	5	7	3	10	4	2	4	2	5	3	10	15	202	JTT+F+R5
OG0000147	5	4	4	8	3	4	9	8	1	6	4	2	7	5	5	4	5	5	11	3	0	6	1	3	7	6	4	12	3	8	8	5	7	6	1	2	4	4	4	4	4	202	LG+C30+F+G
OG0000148	5	6	3	3	6	3	4	4	5	6	1	3	3	7	4	4	4	3	8	11	4	10	4	3	9	5	5	6	4	3	3	3	5	4	5	4	15	4	6	4	3	202	LG+C40+F+G
OG0000149	4	6	7	3	7	3	5	5	5	7	2	4	3	7	4	6	5	3	11	7	3	4	4	4	6	3	5	4	2	5	7	4	5	5	2	4	10	5	5	6	4	201	LG+C50+F+G
OG0000150	1	69	15	4	2	1	1	1	2	1	4	1	6	5	3	12	3	6	6	8	4	4	4	1	2	3	1	1	3	2	2	2	2	1	3	4	4	2	2	2	1	201	LG+C40+F+G
OG0000151	8	2	9	2	6	9	7	6	10	8	1	6	2	4	5	6	8	2	6	1	1	0	2	8	2	1	0	1	4	2	8	3	5	9	2	1	14	7	7	8	7	200	LG+C40+F+G
OG0000152	5	11	5	3	4	3	5	9	4	7	1	6	4	5	5	4	6	4	9	7	3	3	2	4	6	4	5	4	2	4	6	7	6	7	3	2	6	5	5	4	4	199	LG+C40+F+G
OG0000153	5	5	6	5	5	6	12	4	2	6	3	8	4	3	4	5	5	2	3	6	0	1	1	6	3	7	2	7	4	5	6	5	8	10	4	4	5	6	5	5	6	199	LG+C20+F+G
OG0000154	4	5	16	1	4	7	1	5	1	4	1	4	6	5	2	1	10	3	4	3	1	1	1	3	6	8	1	2	6	7	2	3	4	1	6	3	20	8	7	19	3	199	LG+C40+F+G
OG0000155	4	7	19	1	0	8	14	4	3	7	0	0	3	1	1	2	5	6	11	1	3	6	7	1	4	6	0	2	5	8	3	10	10	0	6	3	15	4	1	6	0	197	LG+C10+F+G
OG0000156	2	7	5	7	2	2	3	6	4	3	5	4	3	12	4	5	1	3	3	2	2	16	13	6	7	3	1	1	6	16	4	4	6	4	8	3	1	3	1	7	2	197	LG+C50+F+G
OG0000157	3	3	2	10	2	3	4	4	9	2	6	4	6	5	7	5	2	4	14	6	0	6	2	2	2	11	5	5	8	3	6	5	7	2	7	6	2	2	2	4	7	195	LG+C40+F+G
OG0000158	4	11	5	4	4	6	5	5	5	5	2	8	2	7	4	5	3	3	5	4	5	4	4	5	4	3	3	6	3	5	5	4	5	5	4	3	8	4	6	8	5	196	LG+C40+F+G
OG0000159	1	5	3	3	6	0	2	2	0	0	1	0	31	1	0	1	0	4	2	2	3	2	4	0	1	9	3	1	4	0	0	52	3	0	6	13	30	0	1	0	0	196	LG+C40+F+G
OG0000160	0	10	1	2	0	3	1	0	4	0	1	1	1	1	3	3	2	1	9	110	2	4	3	1	2	6	1	2	10	0	0	0	0	1	6	3	0	0	1	0	0	195	WAG+F+R5
OG0000161	13	0	1	0	0	14	17	13	6	14	0	15	0	2	0	2	3	1	3	1	0	0	0	13	0	0	1	0	1	0	23	0	10	8	0	1	0	7	9	0	14	192	LG+C40+F+G
OG0000162	4	4	6	4	9	5	5	3	3	4	4	5	4	5	4	3	6	7	7	6	3	4	1	5	5	4	3	7	3	5	5	7	5	5	4	4	6	4	5	6	5	194	LG+C50+F+G
OG0000163	4	5	10	5	9	5	6	4	1	5	2	5	4	3	6	4	6	3	3	6	1	1	0	4	4	8	9	5	5	6	5	6	4	6	5	3	4	4	4	7	6	193	LG+C30+F+G
OG0000164	5	4	4	4	5	5	4	4	6	5	4	7	5	5	5	5	5	3	6	3	4	3	3	3	4	4	4	4	4	6	5	10	4	5	6	5	6	5	5	5	4	193	LG+C20+F+G
OG0000165	6	10	6	5	3	2	2	4	2	2	1	7	3	5	4	2	3	5	18	3	6	8	13	6	7	3	1	6	4	4	4	4	6	3	6	2	3	3	2	2	7	193	LG+C40+F+G
OG0000166	5	3	4	6	7	6	5	6	7	4	5	5	4	5	5	7	5	5	6	4	0	1	4	4	5	3	5	4	4	6	5	8	8	5	3	2	5	3	4	5	5	193	JTT+F+R8
OG0000167	4	7	7	3	2	3	9	5	2	5	3	3	10	3	3	5	4	3	10	4	6	3	4	2	3	3	3	4	5	3	4	9	4	7	6	4	4	5	5	11	2	192	LG+C40+F+G
OG0000168	4	2	9	2	8	5	4	6	2	3	1	2	2	2	3	6	9	3	1	4	2	1	2	3	4	5	6	9	6	11	3	9	4	5	5	6	9	6	8	7	3	192	JTT+F+R7
OG0000169	6	4	10	3	6	11	26	0	0	4	0	0	38	4	4	3	2	2	3	0	1	1	0	3	0	3	2	1	5	18	1	4	3	1	2	4	3	7	5	1	1	192	LG+C40+F+G
OG0000170	4	8	4	5	6	4	6	4	5	4	5	2	4	3	6	4	4	6	11	6	4	4	2	3	3	5	10	1	4	7	3	5	4	4	4	6	7	3	2	5	5	192	LG+C60+F+G
OG0000171	7	12	1	2	6	8	10	7	8	6	3	7	2	4	2	2	1	2	12	1	3	3	3	5	2	2	3	2	4	6	7	6	7	9	2	2	4	5	5	2	6	191	LG+C40+F+G
OG0000172	2	3	5	4	2	5	1	1	4	2	4	3	3	11	4	2	5	6	6	8	10	15	18	1	3	3	1	3	9	5	7	4	1	4	7	5	3	1	7	2	1	191	LG4X
OG0000173	6	9	4	5	5	4	6	4	3	5	3	5	7	5	4	7	5	3	9	4	3	4	4	5	6	3	2	5	4	4	4	4	4	4	6	4	3	5	4	4	5	190	LG+C40+F+G
OG0000174	8	2	5	4	6	5	7	7	6	6	5	4	3	4	4	6	4	5	11	3	3	6	2	6	4	2	5	1	2	4	7	5	5	5	2	3	3	6	5	4	5	190	LG+C40+F+G
OG0000175	5	4	1	1	2	6	12	9	10	11	2	1	1	3	3	3	1	2	7	2	1	4	5	4	1	4	1	2	4	1	10	1	4	20	2	2	1	7	17	1	10	188	JTT+F+R5
OG0000176	3	6	12	5	4	1	2	3	2	3	3	1	10	1	5	12	4	4	2	5	3	3	4	1	6	5	3	5	5	9	1	11	4	3	7	4	13	2	3	5	2	187	LG+C40+F+G
OG0000177	5	11	8	5	4	5	6	6	4	4	4	5	1	3	3	7	3	2	4	2	4	7	6	5	4	2	2	3	4	5	5	3	5	6	4	3	7	6	7	1	6	187	LG+C30+F+G
OG0000178	1	0	0	0	0	34	2	61	3	15	0	1	36	0	0	14	0	0	1	0	0	0	0	0	0	0	0	0	0	0	7	0	0	1	1	1	0	2	3	0	4	187	JTT+F+R5
OG0000179	5	9	3	4	3	4	4	5	4	4	10	5	4	7	5	4	3	5	6	3	3	3	3	6	5	4	2	9	5	2	6	7	3	4	4	4	1	4	4	5	5	186	LG+C50+F+G
OG0000180	5	5	6	5	8	4	4	4	4	4	6	4	5	3	2	7	4	4	6	7	2	4	2	4	3	5	3	5	4	4	4	7	4	4	4	6	4	4	4	6	4	184	LG+C60+F+G
OG0000181	2	6	8	4	4	2	2	2	2	2	4	2	3	5	5	4	4	5	14	9	7	6	4	2	2	5	3	5	4	5	2	1	2	2	3	3	18	2	2	14	2	183	LG+C60+F+G
OG0000182	2	9	4	0	5	1	6	5	0	8	0	4	11	1	0	1	1	4	11	0	0	4	0	2	0	12	2	12	2	1	2	24	3	6	3	9	11	3	9	2	2	182	LG+C30+F+G
OG0000183	1	0	9	2	5	0	10	7	3	8	0	0	0	0	1	5	6	0	29	25	0	0	0	1	4	0	0	0	0	3	10	10	7	8	0	0	5	7	8	6	2	182	LG+C40+F+G
OG0000184	3	7	5	6	6	5	3	4	3	3	6	3	5	6	6	5	7	6	7	3	6	5	8	3	4	5	4	4	3	3	3	4	3	3	3	6	4	3	2	4	2	181	LG+C40+F+G
OG0000185	6	9	6	6	5	6	3	1	0	7	0	3	4	2	6	5	3	0	5	4	0	0	0	4	3	7	1	9	7	8	5	4	8	3	8	1	3	7	7	10	5	181	LG+C20+F+G
OG0000186	2	5	18	3	13	1	2	2	3	2	2	2	1	0	4	0	19	6	12	4	3	2	2	2	9	4	7	0	1	4	3	9	2	3	2	3	7	2	2	13	0	181	LG+C60+F+G
OG0000187	3	12	2	2	3	6	4	4	4	5	5	5	4	1	4	5	2	2	6	3	2	3	2	2	3	3	4	5	5	7	5	3	4	5	2	4	21	4	5	2	6	179	LG+C50+F+G
OG0000188	3	10	4	3	6	3	3	6	3	4	2	5	9	2	3	3	3	5	8	4	3	2	2	9	3	4	3	10	3	3	8	3	5	4	4	3	3	3	3	4	7	178	LG+C40+F+G
OG0000189	3	7	1	2	1	4	4	4	5	4	2	3	2	10	2	2	1	4	3	3	3	3	2	3	10	4	4	2	3	2	4	6	3	4	5	5	32	4	3	4	4	177	LG+C40+F+G
OG0000190	0	0	0	0	1	0	2	0	0	0	0	0	0	0	0	169	0	2	0	0	0	0	1	0	0	0	0	0	0	0	0	0	0	0	0	1	0	0	0	0	0	176	JTT+F+R5
OG0000191	2	9	3	7	2	2	2	2	4	2	3	2	5	7	10	5	2	3	16	4	0	7	3	2	7	6	2	10	7	4	2	2	2	2	10	7	3	2	2	2	2	176	LG+C40+F+G
OG0000192	4	5	9	3	4	5	5	4	3	6	3	4	3	4	4	3	8	3	9	3	5	4	2	4	4	3	5	1	2	4	3	4	4	5	3	3	4	4	5	9	5	175	LG+C20+F+G
OG0000193	3	9	5	1	3	4	4	9	0	6	0	5	2	0	3	7	12	3	3	5	2	0	3	6	4	4	6	3	3	4	5	4	5	7	2	5	5	9	5	4	5	175	JTT+F+R5
OG0000194	4	5	5	4	4	4	4	4	4	4	4	4	4	5	2	4	4	5	7	5	4	1	2	4	5	3	4	6	4	5	4	8	4	4	3	4	7	4	4	5	4	175	LG+C40+F+G
OG0000195	5	6	6	1	6	5	5	6	1	5	1	5	1	2	4	5	4	4	7	4	1	2	1	4	4	2	3	5	5	7	7	7	4	9	2	3	7	5	6	4	3	174	JTT+F+R4
OG0000196	4	4	4	4	4	3	5	3	3	4	4	5	5	3	5	4	4	6	8	4	4	2	6	4	4	3	4	7	4	4	5	4	4	5	4	5	5	4	4	2	4	174	LG+C40+F+G
OG0000197	1	18	3	18	1	1	1	2	1	2	8	2	24	1	0	0	1	3	7	0	9	5	6	1	0	7	1	0	10	3	1	2	1	1	13	13	2	1	1	1	1	173	LG+C30+F+G
OG0000198	2	7	2	5	2	3	2	2	4	8	3	2	3	5	8	5	3	6	13	4	1	2	6	4	4	5	2	9	8	4	2	2	2	2	5	10	2	2	2	4	6	173	LG+C40+F+G
OG0000199	9	8	0	3	1	1	1	39	0	0	0	0	2	2	0	1	0	0	0	0	3	15	3	3	0	12	0	0	27	0	1	0	1	2	16	3	1	1	5	0	11	171	JTT+F+G4
OG0000200	2	13	2	3	4	2	2	2	5	3	4	2	3	10	6	2	4	4	15	3	4	9	11	2	3	5	2	6	3	2	3	2	4	3	4	7	2	2	2	2	2	171	LG+C40+F+G
OG0000201	5	13	3	6	4	1	1	3	3	5	2	8	1	4	7	10	3	0	2	4	2	6	8	10	1	3	3	4	3	3	5	2	8	2	5	6	1	1	2	3	6	169	LG+C20+F+G
OG0000202	4	4	4	7	6	2	2	5	3	5	3	5	4	7	4	4	5	5	11	5	1	3	3	1	6	4	3	2	6	5	4	4	4	3	2	4	4	5	3	6	2	170	LG+C30+F+G
OG0000203	4	2	8	1	5	7	5	6	8	4	3	4	1	3	7	5	5	1	11	3	4	3	1	4	4	1	6	2	1	4	5	3	7	4	1	1	4	4	4	9	5	170	LG+C60+F+G
OG0000204	3	5	1	10	2	2	3	8	5	2	1	3	1	2	9	2	1	4	8	3	0	9	7	1	2	10	1	3	11	2	6	2	9	4	8	7	1	1	3	1	6	169	LG+C40+F+G
OG0000205	6	7	5	3	9	4	5	5	1	4	1	4	3	5	3	4	4	1	11	5	4	4	4	3	2	4	1	4	4	3	6	3	5	4	3	3	3	4	4	5	6	169	JTT+F+R5
OG0000206	0	16	0	1	0	0	0	0	0	0	0	0	19	0	0	0	0	0	0	1	6	23	2	0	0	21	0	0	33	0	0	0	0	1	35	11	0	0	0	0	0	169	JTT+F+R5
OG0000207	10	0	0	0	4	1	12	9	1	9	0	1	0	0	2	2	0	0	14	7	0	0	0	6	1	0	0	0	0	13	14	17	11	16	0	0	0	4	8	1	5	168	LG+C40+F+G
OG0000208	1	1	0	3	1	0	0	1	0	0	3	1	16	1	3	0	1	0	3	0	4	19	8	0	0	38	4	6	30	0	0	1	2	0	13	6	1	0	0	1	0	168	WAG+F+G4
OG0000209	5	6	5	2	3	5	6	5	6	6	2	5	2	7	2	2	3	2	7	5	4	3	6	4	2	2	2	3	2	5	5	3	5	5	3	1	7	5	5	4	5	167	LG+C40+F+G
OG0000210	1	5	14	3	8	0	1	1	1	1	2	1	11	3	3	9	9	7	11	6	4	5	6	1	2	2	5	6	6	5	1	4	1	1	4	3	2	1	1	7	1	165	LG+C20+F+G
OG0000211	4	1	2	6	5	2	3	3	5	2	3	4	6	7	7	5	3	6	12	4	4	5	5	2	3	7	2	4	6	2	4	2	3	3	6	5	2	2	2	2	3	164	LG+C40+F+G
OG0000212	4	7	5	3	11	3	3	2	6	2	0	6	4	1	3	5	4	2	7	3	1	4	5	4	6	4	1	5	7	3	3	5	4	4	3	2	4	2	3	5	7	163	JTT+F+G4
OG0000213	2	2	8	3	3	5	6	4	7	6	1	1	2	1	14	7	1	2	3	2	2	6	6	2	3	1	1	1	2	1	5	11	3	5	4	2	7	6	5	5	4	162	LG+C40+F+G
OG0000214	3	17	3	4	1	7	3	3	3	3	6	1	4	8	4	5	1	5	7	4	6	2	4	3	4	2	1	3	2	2	3	4	5	3	3	7	3	4	3	3	2	161	LG+C60+F+G
OG0000215	1	3	9	5	3	2	3	2	2	2	5	4	6	3	3	3	5	11	10	0	1	2	3	1	3	4	6	0	6	4	1	9	2	1	8	6	12	2	1	5	1	160	LG+C30+F+G
OG0000216	2	4	2	2	4	4	5	4	7	7	4	4	5	6	4	2	4	2	12	3	1	2	3	4	2	2	3	1	4	5	4	5	7	6	3	2	5	3	4	2	4	159	LG+C50+F+G
OG0000217	3	11	2	6	4	3	3	3	3	3	2	5	3	8	2	3	6	5	8	5	7	4	4	3	4	2	3	3	2	2	3	1	3	5	2	5	6	3	3	2	3	158	LG+C40+F+G
OG0000218	6	3	4	0	5	4	7	8	1	9	0	8	0	1	2	0	3	0	3	8	0	1	0	5	4	4	0	5	5	4	11	3	8	7	2	1	3	7	7	3	4	156	LG+C40+F+G
OG0000219	3	7	3	3	3	3	4	3	6	3	4	3	4	6	2	5	8	5	8	2	1	4	4	2	4	5	3	2	4	3	3	5	3	4	3	4	3	4	3	5	3	157	LG+C50+F+G
OG0000220	4	3	8	2	5	5	5	4	4	5	3	4	1	3	3	7	4	1	9	2	4	3	4	4	3	3	5	0	3	3	3	5	5	5	3	2	3	4	4	4	4	156	LG+C40+F+G
OG0000221	3	5	9	3	1	3	4	2	5	3	4	2	8	7	9	7	3	6	4	4	3	4	1	2	9	5	6	2	3	2	3	1	2	3	4	3	0	3	2	3	2	155	LG+C30+F+G
OG0000222	2	4	14	3	16	4	4	2	2	5	5	3	12	2	6	1	4	1	3	3	6	3	6	2	2	1	2	1	1	4	2	7	2	5	1	1	6	2	2	1	2	155	LG+C40+F+G
OG0000223	4	8	3	4	3	3	5	3	5	3	1	5	4	1	1	10	3	6	7	1	2	5	6	5	3	5	1	6	2	5	3	3	3	4	4	5	0	3	3	3	4	155	LG+C30+F+G
OG0000224	3	2	4	0	1	7	6	6	2	2	2	0	8	0	0	7	0	0	4	2	2	5	4	1	0	7	1	1	11	0	3	26	3	3	4	0	23	2	1	0	1	154	LG+C40+F+G
OG0000225	2	9	5	4	9	3	4	4	3	3	2	3	3	4	2	4	5	3	11	6	4	1	4	3	4	3	2	2	2	2	4	3	4	5	2	2	4	4	3	3	4	154	LG+C30+F+G
OG0000226	4	7	5	2	3	3	3	3	5	3	1	3	3	2	9	2	3	3	8	2	5	5	4	3	6	5	2	0	4	5	3	5	3	3	4	3	7	3	3	3	3	153	LG+C30+F+G
OG0000227	2	10	1	10	3	3	3	5	3	4	3	9	2	3	2	2	4	2	5	1	2	1	4	1	2	4	1	2	8	1	3	11	3	2	5	11	2	5	1	1	6	153	LG+C60+F+G
OG0000228	4	11	1	0	1	1	7	6	1	1	1	9	8	1	4	4	1	2	6	1	0	3	4	10	1	6	1	2	5	1	7	2	5	1	6	10	1	1	1	7	8	152	JTT+F+R4
OG0000229	5	0	7	1	4	3	7	6	0	14	0	2	3	0	1	5	8	2	1	0	0	0	1	7	1	2	2	1	2	15	2	5	7	2	1	1	4	8	9	10	3	152	LG+C40+F+G
OG0000230	2	11	5	5	4	3	2	1	1	3	5	2	2	3	5	3	4	6	7	4	6	2	3	3	3	3	3	7	2	5	2	3	4	4	3	5	3	3	2	6	2	152	LG+C40+F+G
OG0000231	3	4	3	3	3	3	3	12	8	10	4	4	2	1	4	5	4	1	1	5	1	0	5	5	2	2	3	3	2	2	3	4	7	3	3	4	3	3	3	5	5	151	LG+C50+F+G
OG0000232	6	1	1	1	1	12	8	6	4	6	2	1	1	1	1	30	1	0	2	1	1	1	1	6	1	1	2	0	1	1	6	1	5	10	1	1	2	5	9	1	9	151	JTT+F+R8
OG0000233	3	8	18	2	6	3	4	4	3	3	5	3	3	1	5	0	6	3	5	3	3	3	1	2	2	5	4	1	3	3	3	5	3	3	4	3	0	3	3	5	4	151	LG+C40+F+G
OG0000234	2	10	3	1	0	5	5	4	4	3	2	2	2	3	1	1	2	3	2	1	9	5	3	3	2	2	2	0	2	24	3	2	4	4	4	7	4	3	5	3	4	151	LG+C50+F+G
OG0000235	3	4	4	5	3	4	5	5	2	4	1	3	3	2	6	5	4	2	4	4	0	3	0	4	3	4	5	4	5	5	3	5	6	4	3	4	4	4	5	3	3	150	LG+C30+F+G
OG0000236	3	5	3	2	4	2	6	4	2	7	1	2	2	2	4	4	5	3	5	8	1	0	2	3	7	4	2	5	1	5	5	4	5	11	0	3	3	4	4	4	3	150	LG+C10+F+G
OG0000237	5	0	9	0	4	4	4	4	2	6	0	0	12	0	11	5	5	9	0	0	0	0	0	8	1	0	2	1	2	0	2	30	4	3	1	0	1	3	7	2	2	149	LG+C20+F+G
OG0000238	3	4	16	2	5	4	6	6	7	4	3	3	2	2	3	2	5	2	5	3	1	1	2	2	6	2	2	1	2	3	5	3	4	5	3	2	1	5	4	5	4	150	LG+C50+F+G
OG0000239	1	19	1	10	1	1	1	2	9	1	3	1	1	2	2	6	2	2	5	2	0	13	12	3	1	7	1	2	12	1	1	1	5	1	5	7	1	1	1	1	1	149	LG+C60+F+G
OG0000240	0	11	1	5	0	1	0	0	0	3	2	1	1	0	3	2	0	9	1	0	1	10	8	0	0	18	3	0	17	0	0	3	0	1	14	26	5	0	1	1	1	149	LG+C20+F+G
OG0000241	3	8	5	3	4	4	3	4	5	5	3	3	3	1	1	2	3	3	7	6	4	3	2	3	2	2	6	0	3	3	4	4	5	5	3	3	4	4	5	3	4	148	LG+C40+F+G
OG0000242	2	2	3	2	5	4	4	5	0	6	0	3	3	3	2	2	2	1	6	3	2	2	0	5	4	4	2	7	7	7	4	4	5	4	5	2	6	5	4	5	5	147	LG+C10+F+G
OG0000243	4	7	1	5	1	2	2	3	5	2	3	2	1	5	3	2	14	6	7	3	4	6	3	2	3	3	1	3	4	10	1	3	2	1	8	8	1	1	2	2	1	147	JTT+F+R7
OG0000244	3	7	4	4	6	4	3	4	2	3	2	4	7	1	3	3	9	6	6	8	4	3	3	3	3	1	1	0	6	6	1	5	3	3	2	1	1	4	2	3	3	147	LG+C40+F+G
OG0000245	1	9	2	5	9	1	3	1	1	2	2	3	1	6	2	2	3	1	5	2	15	6	6	1	2	7	2	0	21	1	1	3	1	2	3	5	1	2	2	1	3	146	WAG+F+R5
OG0000246	0	0	0	0	0	0	0	0	0	0	0	0	0	0	0	0	1	1	141	1	0	0	0	0	0	0	1	0	0	0	0	0	0	0	0	0	1	0	0	0	0	146	JTT+F+R5
OG0000247	3	11	1	5	1	1	3	3	6	1	1	3	1	7	6	1	1	2	13	2	3	7	9	1	2	7	1	4	6	1	1	1	5	1	10	9	1	1	1	1	2	146	LG+C50+F+G
OG0000248	3	0	19	1	19	2	3	2	4	3	1	2	1	3	2	2	11	2	2	3	0	0	0	3	6	0	3	0	0	4	4	7	3	3	0	0	4	3	3	15	3	146	LG+C50+F+G
OG0000249	6	7	2	3	2	2	2	3	0	7	0	9	1	0	7	9	1	1	5	3	0	4	2	4	6	4	1	9	2	2	5	2	6	2	4	6	2	3	2	2	8	146	JTT+F+R4
OG0000250	5	4	2	3	4	2	5	4	2	4	2	3	2	4	4	8	6	1	6	5	0	0	1	4	5	2	1	4	4	4	6	3	5	5	4	4	3	3	2	3	7	146	LG+C30+F+G
OG0000251	5	2	4	1	3	8	10	7	7	8	1	5	1	2	1	3	0	1	2	6	2	1	1	4	2	1	3	0	1	5	7	4	5	7	1	2	4	4	7	0	8	146	LG+C40+F+G
OG0000252	4	4	6	3	1	2	3	6	7	2	5	5	2	4	5	1	2	3	8	4	2	7	6	2	5	3	7	2	4	2	3	2	5	4	2	3	2	2	2	1	2	145	JTT+F+R4
OG0000253	6	2	3	0	5	5	5	1	4	14	0	0	1	0	0	1	8	0	0	0	1	0	1	4	0	2	3	26	0	14	0	0	5	1	0	1	15	4	2	9	2	145	WAG+F+R4
OG0000254	3	4	5	3	4	3	3	3	3	3	3	3	3	3	3	5	3	2	3	2	6	4	4	3	4	5	5	4	4	7	3	2	4	3	3	4	3	3	3	4	3	145	LG+C40+F+G
OG0000255	0	2	3	0	7	2	1	0	0	2	0	2	0	0	8	6	1	0	14	0	0	6	2	0	0	6	0	1	2	0	0	33	1	0	4	7	27	2	3	2	1	145	LG+C40+F+G
OG0000256	2	0	16	6	11	8	1	1	2	9	0	4	1	1	0	0	0	9	0	0	1	0	1	2	5	1	0	0	0	0	4	1	1	4	6	6	27	4	5	2	3	144	LG+C30+F+G
OG0000257	4	7	1	4	2	7	8	3	9	6	5	2	3	2	1	1	1	3	5	4	2	3	2	4	6	2	2	1	3	2	6	0	3	4	3	4	4	5	4	1	4	143	LG+C40+F+G
OG0000258	3	6	4	4	4	3	4	3	3	3	6	4	3	4	3	3	4	5	7	3	2	1	0	3	7	4	0	4	6	3	4	3	3	4	2	2	3	4	3	3	3	143	LG+C40+F+G
OG0000259	4	5	2	3	3	2	3	4	1	3	2	2	5	4	4	8	2	3	7	4	1	7	5	2	5	5	2	7	8	2	2	2	5	2	6	0	2	2	2	3	2	143	LG+C40+F+G
OG0000260	3	7	4	4	5	2	2	1	1	3	2	3	3	0	7	4	6	3	9	5	1	5	2	2	5	4	3	3	5	6	1	7	2	2	2	2	5	2	2	5	2	142	LG+C30+F+G
OG0000261	8	0	2	0	0	10	11	8	11	13	0	8	0	0	0	0	2	0	0	0	0	0	0	7	0	0	0	0	0	1	9	1	6	8	0	0	8	10	7	1	11	142	JTT+F+R4
OG0000262	10	6	1	4	1	1	3	7	0	4	0	5	6	1	6	7	1	1	1	0	0	8	4	8	0	6	2	2	7	4	3	6	6	1	4	2	1	1	2	2	8	142	LG+C30+F+G
OG0000263	2	7	2	4	6	2	2	3	2	2	5	2	4	3	2	2	7	6	11	4	2	10	6	2	3	4	3	3	5	1	2	1	3	4	1	3	2	2	2	2	2	141	LG+C40+F+G
OG0000264	5	6	4	5	3	2	3	3	3	3	2	7	5	2	3	3	3	4	5	4	2	3	3	2	3	2	3	5	4	4	4	4	3	3	2	2	4	3	3	4	2	140	LG+C40+F+G
OG0000265	2	15	5	3	3	2	3	2	4	2	5	2	3	1	6	3	2	4	8	3	5	2	3	2	4	5	5	1	4	4	2	5	2	2	2	3	3	1	2	3	2	140	LG+C40+F+G
OG0000266	3	6	3	3	3	3	3	3	3	3	4	4	3	3	2	2	3	5	10	2	2	3	5	3	3	4	4	3	3	3	3	5	3	3	3	3	4	3	3	3	3	140	LG+C40+F+G
OG0000267	3	5	4	2	5	3	5	5	2	4	4	5	1	4	2	2	6	1	4	5	1	3	1	6	3	2	2	4	2	2	4	4	2	7	3	2	3	4	4	5	4	140	LG+C20+F+G
OG0000268	6	7	5	2	3	2	2	2	0	4	0	7	2	1	2	4	9	3	4	2	1	0	0	4	2	5	3	9	5	3	4	3	6	4	3	4	4	2	2	3	5	139	LG+C20+F+G
OG0000269	2	5	4	2	2	1	4	2	7	2	1	3	2	6	1	18	2	3	12	2	1	1	3	2	3	5	2	0	2	5	2	4	2	4	2	3	6	2	2	3	3	138	LG+C40+F+G
OG0000270	3	4	5	2	4	3	3	3	3	3	3	3	3	3	2	2	2	1	10	4	3	4	2	3	2	2	2	5	2	3	3	15	4	4	1	3	3	3	3	3	2	138	LG+C40+F+G
OG0000271	2	2	11	8	1	4	3	3	4	4	3	2	1	2	2	7	2	2	2	1	4	2	1	3	5	1	8	0	6	3	3	2	3	4	10	3	1	3	2	5	2	137	LG+C50+F+G
OG0000272	3	2	4	3	3	2	6	6	1	4	1	3	3	2	2	6	6	0	4	3	0	0	0	3	3	1	2	3	3	6	2	6	4	4	7	4	5	9	2	5	4	137	LG+C30+F+G
OG0000273	2	6	4	2	4	2	2	2	5	2	5	2	2	6	2	2	3	7	8	4	1	5	4	2	3	5	2	5	5	4	2	3	3	2	3	5	3	2	2	2	2	137	LG+C30+F+G
OG0000274	0	7	5	1	2	4	7	0	0	1	0	0	20	0	0	2	0	0	4	0	4	11	9	0	0	10	0	0	18	1	0	17	0	1	5	3	0	1	2	0	2	137	JTT+F+G4
OG0000275	3	2	4	3	6	3	3	4	4	2	5	3	3	6	3	3	3	5	5	3	4	2	2	3	3	3	3	2	3	3	3	3	3	3	3	4	3	3	3	4	3	136	LG+C20+F+G
OG0000276	2	4	5	5	1	2	2	2	2	3	3	2	4	13	2	1	3	6	4	7	4	3	5	2	2	3	5	2	4	2	3	4	2	2	3	3	2	2	2	6	2	136	LG+C20+F+G
OG0000277	2	5	2	5	3	1	1	3	7	1	5	2	2	6	2	2	3	4	8	2	2	6	5	1	3	3	1	6	7	4	1	7	4	1	6	5	2	2	1	2	1	136	LG+C40+F+G
OG0000278	1	7	2	5	0	1	1	1	1	1	2	1	12	7	7	3	2	6	4	4	4	5	3	0	3	5	6	1	5	2	1	3	1	1	6	5	7	1	1	7	1	136	LG+C30+F+G
OG0000279	5	15	0	3	0	4	1	2	2	3	5	6	4	11	2	3	0	4	19	1	4	4	9	5	4	0	2	0	0	0	2	0	2	5	1	3	0	1	2	0	1	135	LG+C50+F+G
OG0000280	2	9	2	2	2	2	3	2	3	2	6	3	3	5	5	2	2	5	13	2	1	6	6	3	7	3	2	2	2	2	2	1	3	2	3	4	3	2	2	2	2	135	LG+C40+F+G
OG0000281	4	3	9	1	3	4	4	4	6	6	1	3	1	6	3	1	10	2	10	2	1	1	1	5	3	1	2	1	2	2	4	3	3	4	2	1	2	4	2	4	4	135	LG+C50+F+G
OG0000282	2	3	2	3	0	4	4	4	3	7	3	3	3	1	2	5	1	5	6	2	2	3	2	4	6	3	3	2	4	2	5	3	3	4	3	2	5	3	4	7	2	135	WAG+F+R5
OG0000283	1	5	2	3	1	1	4	6	6	3	2	9	5	1	5	3	2	4	4	2	4	0	7	2	2	6	2	6	4	1	4	1	7	3	3	4	1	2	1	1	5	135	LG+C30+F+G
OG0000284	3	0	4	3	6	5	1	3	2	4	3	3	4	4	2	1	4	3	6	2	6	1	7	5	3	4	2	3	4	4	4	2	3	2	2	3	3	3	3	4	3	134	JTT+F+R5
OG0000285	6	4	1	1	3	1	7	5	0	4	1	8	7	1	2	5	2	0	5	3	0	6	7	6	2	3	1	5	1	1	6	1	4	10	0	2	1	1	2	9	0	134	JTT+F+R4
OG0000286	2	3	3	1	2	2	7	2	3	2	1	6	4	6	2	6	5	4	4	4	1	3	3	3	3	6	4	1	4	3	2	3	2	4	5	1	4	2	2	7	2	134	LG+C40+F+G
OG0000287	2	3	5	4	2	4	3	2	3	2	2	2	4	4	1	13	2	2	8	3	5	2	2	2	5	3	1	0	4	7	4	3	3	5	2	1	2	4	3	2	3	134	LG+C30+F+G
OG0000288	2	4	3	4	5	2	2	3	4	2	1	2	3	6	6	2	3	1	8	4	6	6	6	2	2	3	5	2	5	2	2	5	2	2	2	3	2	2	2	3	2	133	LG+C60+F+G
OG0000289	3	2	6	4	3	3	3	4	5	3	3	3	3	2	2	4	3	4	3	3	2	2	4	3	1	2	3	2	2	6	3	7	3	3	3	3	4	3	3	5	2	132	LG+C60+F+G
OG0000290	1	1	2	5	1	2	3	2	2	4	4	3	3	2	5	11	3	3	5	9	2	1	4	2	5	2	6	10	2	2	1	1	4	1	3	5	2	1	2	3	1	131	LG+C30+F+G
OG0000291	3	8	2	4	2	2	3	2	2	2	1	2	4	3	5	3	6	4	4	2	3	5	5	5	2	3	2	2	3	3	3	2	3	4	3	6	2	2	2	2	6	132	LG+C20+F+G
OG0000292	2	8	5	3	7	2	2	2	3	2	2	2	2	5	3	3	2	4	10	2	1	2	2	2	3	3	1	4	4	10	2	3	2	3	3	5	3	2	2	2	2	132	LG+C40+F+G
OG0000293	3	5	2	3	2	4	4	3	5	4	4	2	2	5	3	2	3	3	5	4	5	2	4	2	5	2	3	2	6	2	3	2	3	4	2	3	2	3	4	2	3	132	LG+C50+F+G
OG0000294	2	6	2	3	3	2	3	2	1	2	2	1	4	4	4	4	6	4	9	2	4	4	3	4	4	3	1	6	3	2	2	2	4	2	4	4	2	2	2	4	4	132	LG+C50+F+G
OG0000295	2	1	2	3	2	2	3	4	7	3	1	3	2	2	3	2	2	4	5	6	11	5	11	2	3	0	2	5	5	2	3	2	2	3	4	2	2	1	3	2	3	132	LG+C20+F+G
OG0000296	2	4	3	2	2	2	2	3	3	2	2	2	3	4	3	4	5	4	7	2	3	6	2	2	3	6	3	5	4	2	2	2	3	2	5	6	3	2	2	5	2	131	LG+C40+F+G
OG0000297	2	4	5	2	5	2	4	3	4	4	4	2	2	3	3	3	2	4	7	1	4	5	1	2	2	1	2	2	2	2	4	4	4	5	3	4	3	4	4	5	2	131	LG+C50+F+G
OG0000298	2	6	3	2	3	4	4	3	2	5	2	3	4	1	1	2	2	3	4	5	2	2	1	2	4	2	5	6	9	2	4	5	4	4	1	1	4	4	3	3	2	131	LG+C30+F+G
OG0000299	4	0	1	1	2	7	6	4	4	13	1	5	1	2	1	8	1	0	3	3	1	0	0	1	2	1	1	0	2	2	6	10	3	5	2	1	14	5	3	1	4	131	LG+C40+F+G
OG0000300	1	6	2	1	3	1	1	2	2	2	2	1	1	4	5	7	1	3	13	1	2	6	2	3	3	6	3	6	12	1	2	1	5	2	5	3	1	1	2	0	6	131	LG+C40+F+G
OG0000301	3	4	8	1	6	4	4	3	4	5	3	1	3	2	2	1	5	3	5	5	3	2	2	3	2	2	5	0	1	4	4	2	4	4	2	2	1	4	2	5	4	130	LG+C60+F+G
OG0000302	7	4	1	7	1	2	1	6	5	2	1	4	1	2	0	10	1	0	11	2	0	1	1	5	2	7	1	5	5	3	3	4	6	2	1	3	1	2	1	2	7	130	LG+C60+F+G
OG0000303	4	5	3	3	4	1	2	3	2	2	3	2	1	2	3	3	3	2	5	6	2	10	7	2	4	2	2	3	3	3	3	5	2	2	4	2	3	2	3	4	3	130	LG+C30+F+G
OG0000304	3	3	3	3	4	3	3	3	4	3	3	4	2	3	3	3	6	2	4	3	3	3	2	3	3	3	3	4	3	4	2	4	3	3	3	3	4	2	3	4	3	130	C60
OG0000305	2	4	7	2	5	3	3	2	7	2	3	2	2	3	2	3	6	2	5	2	2	2	3	2	4	2	2	2	2	2	3	7	3	3	2	3	3	3	3	8	2	130	LG+C40+F+G
OG0000306	2	2	3	5	3	4	3	2	2	2	2	3	6	6	2	5	2	4	11	3	3	0	4	2	5	4	5	0	5	2	2	2	2	4	3	5	2	2	2	1	2	129	LG+C40+F+G
OG0000307	3	4	2	2	2	2	2	4	4	3	5	2	2	2	4	3	2	5	7	5	5	4	7	2	5	1	2	1	5	6	2	2	5	2	2	1	2	2	2	4	2	129	LG+C40+F+G
OG0000308	3	2	5	2	3	3	3	3	8	3	5	3	3	3	1	2	5	1	9	3	2	4	2	3	3	2	2	3	2	2	3	2	4	4	3	2	1	3	3	5	4	129	LG+C30+F+G
OG0000309	3	4	2	3	4	3	3	2	6	3	2	3	3	2	3	2	1	3	10	5	2	3	3	3	3	5	3	2	3	2	3	3	4	3	2	3	3	3	3	3	3	129	LG+C40+F+G
OG0000310	1	7	3	2	2	3	3	2	3	2	1	2	5	3	2	3	4	5	2	1	2	3	4	2	2	5	3	3	6	3	3	3	3	2	7	5	3	4	3	6	1	129	LG+C20+F+G
OG0000311	3	9	1	1	2	1	1	4	3	1	3	1	1	3	6	1	1	4	7	2	2	12	9	2	3	4	1	1	2	1	4	7	8	2	1	8	1	1	1	1	3	129	LG+C30+F+G
OG0000312	2	5	5	3	4	3	3	2	2	8	1	3	1	1	2	1	4	2	12	3	1	4	3	2	4	1	2	0	1	3	2	7	2	3	1	2	8	3	3	7	3	129	LG+C40+F+G
OG0000313	3	6	3	2	4	3	3	4	3	3	2	4	2	3	5	4	3	2	6	2	2	3	4	3	3	2	2	1	2	5	3	5	3	2	2	2	4	3	2	6	2	128	LG+C30+F+G
OG0000314	4	4	2	3	1	5	5	4	6	5	1	5	1	2	2	2	1	0	14	8	1	2	1	4	2	2	1	1	2	2	5	1	5	5	1	1	3	2	4	5	3	128	LG+C20+F+G
OG0000315	2	7	5	3	6	2	2	2	7	2	3	2	2	4	4	3	4	3	5	3	1	4	3	3	3	1	4	2	4	3	2	3	2	2	2	4	2	2	2	3	5	128	LG+C20+F+G
OG0000316	3	2	7	3	4	4	3	4	3	4	2	4	2	3	4	1	7	2	3	3	3	3	2	3	3	3	3	1	3	3	3	2	3	4	3	3	3	3	4	1	4	128	LG+C40+F+G
OG0000317	4	3	3	3	2	2	2	3	4	3	3	3	4	4	4	2	4	3	5	2	4	2	2	3	3	4	5	2	5	4	3	3	3	3	1	4	4	3	3	1	3	128	JTT+F+I+G4
OG0000318	1	3	2	4	4	1	2	4	2	3	2	2	2	3	1	2	2	5	7	3	5	5	13	1	3	1	0	4	6	2	3	4	4	2	3	4	3	3	3	2	1	127	LG+C20+F+G
OG0000319	3	3	3	4	5	3	3	3	3	3	3	3	2	3	3	3	3	2	6	4	2	2	2	3	3	2	5	3	4	3	3	3	3	3	3	2	4	3	3	3	3	127	LG+C30+F+G
OG0000320	3	3	3	3	5	2	3	3	3	3	3	3	3	4	3	3	3	3	3	1	4	3	3	3	4	3	3	3	3	3	3	3	3	3	4	4	3	3	3	4	2	127	LG+C40+F+G
OG0000321	2	2	1	3	4	3	4	2	1	4	2	6	2	0	3	7	8	2	7	2	1	1	0	1	4	2	7	7	1	5	3	5	4	4	1	0	3	3	3	2	5	127	LG+C30+F+G
OG0000322	0	7	1	1	3	6	2	1	2	5	6	1	3	0	1	4	1	1	9	2	2	0	1	0	0	1	1	1	1	11	3	2	1	3	1	1	31	4	3	3	1	127	LG+C20+F+G
OG0000323	5	7	2	8	1	1	1	4	1	2	3	3	1	2	4	2	3	3	3	1	1	5	4	3	4	9	2	3	8	1	3	2	5	1	6	4	1	1	1	2	3	126	LG+C40+F+G
OG0000324	7	2	6	6	1	1	1	8	5	6	2	2	7	1	6	3	1	4	9	1	0	4	0	2	3	2	2	0	9	2	1	1	5	1	2	3	1	1	2	1	5	126	JTT+F+R6
OG0000325	1	4	1	2	3	3	2	6	7	2	5	7	1	6	5	1	1	5	5	2	2	5	4	5	2	2	2	1	2	1	3	2	6	4	4	1	1	1	4	1	4	126	LG+C30+F+G
OG0000326	3	1	3	3	1	2	3	2	3	4	0	3	4	2	5	1	2	3	4	2	9	8	9	3	0	2	1	3	2	3	3	2	2	4	5	3	3	3	3	3	4	126	LG+C20+F+G
OG0000327	2	8	4	4	3	2	3	2	1	2	2	4	5	4	3	4	4	7	3	4	0	3	2	2	5	3	3	0	6	2	2	3	2	2	4	4	1	1	3	2	4	125	LG+C20+F+G
OG0000328	2	5	3	4	4	3	3	2	3	2	4	4	3	7	2	2	2	3	7	3	3	3	3	2	3	4	3	1	4	4	2	3	1	2	4	4	2	2	2	3	2	125	LG+C40+F+G
OG0000329	3	4	4	1	3	1	2	1	4	2	0	2	6	4	2	7	2	2	8	5	2	5	4	1	4	3	3	4	3	2	4	2	5	2	2	6	2	1	1	2	4	125	LG+C20+F+G
OG0000330	4	3	11	2	2	3	2	3	2	2	3	5	3	1	4	6	2	3	1	1	3	6	3	3	3	5	2	8	3	1	3	1	3	3	2	2	1	3	3	1	3	125	LG+C40+F+G
OG0000331	0	0	0	1	0	0	0	0	0	0	0	0	0	0	1	0	0	118	1	1	0	0	0	0	0	1	0	0	0	0	0	0	0	1	0	0	0	0	1	0	0	125	LG+C40+F+G
OG0000332	2	9	2	4	2	3	2	2	7	2	3	3	2	4	5	2	3	7	5	3	1	4	1	2	4	2	1	2	3	3	2	3	3	2	2	6	2	2	2	2	3	124	JTT+F+I+G4
OG0000333	3	0	3	2	1	2	1	4	0	1	0	0	38	1	1	0	0	0	6	1	0	0	1	1	2	3	1	0	0	0	0	15	4	0	1	5	19	1	5	2	0	124	LG+C20+F+G
OG0000334	2	5	3	4	2	2	2	2	2	4	2	7	2	4	2	4	2	3	5	4	2	1	2	3	4	4	5	3	2	2	3	2	5	4	2	4	2	2	2	3	4	124	LG+C20+F+G
OG0000335	3	4	4	4	4	2	2	2	3	2	3	3	3	3	5	0	5	4	3	3	3	3	4	2	3	2	1	2	6	3	2	3	2	2	4	5	4	2	2	4	2	123	LG+C30+F+G
OG0000336	2	2	4	1	5	1	2	1	2	2	2	4	1	2	0	5	3	2	4	10	3	2	1	2	3	2	2	1	2	7	3	10	3	4	3	3	8	3	3	2	1	123	LG+C20+F+G
OG0000337	3	0	4	5	6	4	2	3	0	6	0	2	4	2	2	3	4	1	1	5	0	0	0	3	5	6	3	4	2	4	3	3	6	2	0	1	4	7	5	5	3	123	LG+C20+F+G
OG0000338	2	5	2	2	3	4	3	4	4	4	3	2	4	3	3	1	3	1	9	2	1	3	3	2	3	3	2	1	3	0	4	4	2	5	3	3	4	3	4	3	3	123	JTT+F+R3
OG0000339	3	3	1	4	3	3	3	2	1	2	2	2	0	0	2	10	1	1	1	0	10	1	0	2	0	4	1	1	5	26	3	1	2	3	5	2	1	4	3	2	3	123	LG+C20+F+G
OG0000340	2	7	2	2	2	2	5	2	5	2	2	1	2	5	3	2	2	4	8	2	2	8	5	3	3	1	2	6	2	3	2	2	2	2	3	4	2	2	2	3	2	123	LG+C50+F+G
OG0000341	3	1	5	1	5	3	4	4	4	5	1	4	1	2	1	6	3	1	9	2	1	1	1	4	2	1	1	3	2	3	4	4	3	5	1	1	4	5	4	4	4	123	LG+C50+F+G
OG0000342	1	8	2	2	4	2	2	2	2	2	2	1	5	4	1	1	1	4	7	2	16	8	12	2	3	1	1	0	2	2	2	6	1	2	1	2	1	2	1	1	1	122	WAG+F+R3
OG0000343	3	0	2	3	3	3	4	3	1	4	1	3	7	3	5	4	3	0	0	3	0	0	0	4	6	7	3	3	7	3	8	2	3	3	2	1	4	2	3	2	4	122	LG+C20+F+G
OG0000344	1	2	3	2	4	1	1	1	4	1	6	2	2	2	10	2	2	6	11	4	2	6	6	3	5	4	1	0	3	2	1	3	1	1	2	5	4	1	1	3	1	122	LG+C40+F+G
OG0000345	2	3	4	3	1	2	2	2	3	2	4	3	3	5	2	2	2	3	9	8	3	4	3	2	3	3	1	1	3	3	4	3	2	2	3	3	1	3	2	5	3	122	LG+C30+F+G
OG0000346	2	7	3	3	2	2	2	2	4	2	3	2	2	5	4	2	2	2	9	1	5	3	7	2	3	2	2	4	3	2	4	3	2	2	2	5	2	2	2	2	2	122	LG+C40+F+G
OG0000347	6	4	2	5	3	3	2	5	0	4	1	5	2	2	1	6	3	2	2	2	1	1	0	7	1	3	2	3	4	3	3	2	3	2	4	2	3	1	5	6	6	122	LG+C40+F+G
OG0000348	2	8	2	2	3	2	2	2	3	2	5	2	2	4	3	3	2	2	14	3	2	1	4	2	2	4	2	3	5	2	2	3	2	2	3	5	2	2	2	2	2	122	LG+C40+F+G
OG0000349	4	2	3	3	2	2	3	5	2	3	6	3	3	3	3	3	3	3	3	5	4	2	3	3	3	1	7	1	1	3	3	2	3	4	3	2	2	3	3	2	3	122	LG+C50+F+G
OG0000350	0	35	0	13	0	0	0	0	0	0	12	0	8	1	1	0	0	5	0	0	8	5	2	0	16	7	0	2	4	0	0	0	0	0	1	2	0	0	0	0	0	122	WAG+F+R5
OG0000351	2	5	3	2	3	2	2	2	4	4	4	3	2	4	5	2	4	3	11	2	2	1	4	2	2	4	2	3	3	4	2	3	2	3	2	2	2	2	2	3	2	121	LG+C40+F+G
OG0000352	3	9	1	7	4	1	2	5	3	3	3	2	3	7	3	4	1	1	9	3	1	4	2	5	1	3	1	1	2	1	4	1	5	1	2	4	1	2	1	2	3	121	JTT+F+R5
OG0000353	4	1	1	3	0	4	13	6	3	7	5	4	4	4	0	2	0	3	2	0	0	0	3	2	0	0	0	0	3	2	2	2	0	13	0	4	1	5	4	9	5	121	WAG+F+R4
OG0000354	2	0	6	1	4	4	4	1	2	2	1	3	3	0	0	3	0	2	3	3	0	0	2	2	1	3	3	0	2	4	2	34	2	3	2	2	3	4	3	2	3	121	LG+C10+F+G
OG0000355	3	3	3	3	4	3	3	3	2	3	3	2	3	1	0	3	5	2	5	2	2	5	2	3	2	3	3	3	4	3	3	3	3	3	6	3	3	3	3	3	2	121	LG+C30+F+G
OG0000356	2	6	4	2	2	2	3	3	2	3	4	4	4	2	2	2	1	2	6	2	2	2	3	2	2	3	2	2	3	4	3	5	4	3	1	3	4	4	3	6	2	121	LG+C50+F+G
OG0000357	2	0	1	7	0	2	2	3	5	2	8	3	4	6	2	2	1	2	11	4	5	6	4	2	2	1	2	0	2	5	2	8	2	2	2	1	0	2	2	2	2	121	LG+C20+F+G
OG0000358	1	4	2	3	3	2	1	3	3	2	2	2	2	6	2	4	2	2	5	2	1	6	7	2	2	3	3	4	5	3	4	3	2	3	4	3	2	2	2	4	3	121	LG+C20+F+G
OG0000359	0	1	0	0	0	40	18	1	0	2	0	0	0	0	0	1	0	0	0	0	0	0	0	0	0	0	0	0	0	0	0	0	0	12	0	0	0	0	22	0	24	121	JTT+F+R4
OG0000360	1	4	5	4	0	1	2	2	1	3	6	2	14	3	2	2	0	8	7	2	2	2	2	2	0	4	3	0	3	3	2	1	1	2	4	2	11	1	2	2	2	120	LG4X
OG0000361	6	2	7	1	1	1	1	4	0	3	1	9	1	2	0	4	1	3	5	1	1	8	2	7	1	7	1	2	8	1	7	1	5	1	1	4	1	1	1	2	5	120	LG+C60+F+G
OG0000362	3	3	2	3	4	2	4	3	2	2	2	5	4	3	3	2	2	1	7	2	2	1	3	6	2	4	2	3	2	6	3	7	3	3	1	1	2	2	2	2	4	120	JTT+F+I+G4
OG0000363	2	2	2	2	3	2	4	4	3	4	2	3	2	3	4	0	3	5	4	1	2	3	4	3	2	2	2	2	5	2	5	3	3	4	6	2	3	4	4	2	2	120	LG+C30+F+G
OG0000364	2	5	2	5	2	2	2	2	2	2	4	2	5	2	5	3	2	3	8	2	2	3	5	2	3	5	4	2	3	2	2	2	2	3	4	3	3	1	2	3	2	120	LG+C40+F+G
OG0000365	0	9	5	0	0	5	7	0	0	6	0	2	0	0	0	1	0	27	2	0	1	10	2	0	0	3	1	0	10	0	0	0	0	5	4	13	0	0	7	0	0	120	LG+C30+F+G
OG0000366	0	1	0	0	0	0	0	0	0	0	3	4	60	6	3	3	0	22	0	0	1	1	0	0	6	2	0	0	2	0	0	3	0	1	1	1	0	0	0	0	0	120	LG+C10+F+G
OG0000367	2	6	2	2	2	2	2	2	6	3	2	3	2	3	2	5	2	5	10	5	2	5	1	2	2	2	2	2	3	3	2	2	7	2	2	2	2	2	2	2	2	119	LG+C20+F+G
OG0000368	2	4	10	2	3	2	3	2	3	3	1	4	2	1	1	2	2	8	1	3	2	1	2	2	2	2	3	2	6	2	2	9	3	2	5	2	2	2	2	5	2	119	JTT+F+R7
OG0000369	4	5	2	2	1	1	1	3	0	3	1	2	2	5	1	6	1	2	5	3	2	4	1	6	2	8	4	7	7	1	3	1	4	1	5	3	1	1	1	1	6	119	LG+C40+F+G
OG0000370	1	4	0	2	5	4	2	3	0	0	1	0	3	1	12	26	0	9	7	0	0	7	0	1	3	2	2	0	9	0	3	2	0	0	3	2	3	1	1	0	0	119	LG+C50+F+G
OG0000371	2	8	3	3	4	2	3	2	3	2	3	2	2	4	2	2	2	3	10	2	3	3	5	2	3	2	3	7	2	2	2	2	2	3	2	3	2	2	2	1	2	119	LG+C40+F+G
OG0000372	6	1	2	0	4	3	1	5	3	2	0	0	5	1	1	2	6	1	0	1	0	0	0	5	1	0	1	7	2	6	3	6	8	5	3	2	5	6	8	6	0	118	WAG+F+R5
OG0000373	4	1	5	3	7	3	2	5	2	6	0	5	3	0	1	4	7	0	2	0	0	2	1	3	1	1	4	0	2	6	0	5	5	3	2	1	4	4	5	6	3	118	LG+C30+F+G
OG0000374	3	4	2	2	2	2	2	2	4	5	3	2	2	2	2	4	3	2	5	2	4	2	3	3	2	2	2	2	2	4	4	6	2	2	2	2	9	4	2	2	2	118	LG+C50+F+G
OG0000375	2	6	2	4	2	2	2	2	3	2	4	2	2	4	2	2	2	5	10	2	2	3	6	2	3	2	6	2	4	2	2	2	2	2	3	3	2	2	2	2	2	118	LG+C30+F+G
OG0000376	1	6	3	3	3	2	2	1	4	1	4	1	4	3	2	2	4	5	8	3	3	6	6	1	2	2	2	1	3	3	1	10	1	1	4	4	1	1	1	2	1	118	JTT+F+I+G4
OG0000377	1	10	7	4	1	1	1	1	5	1	3	1	1	2	6	1	1	3	12	1	1	7	5	1	5	2	1	2	3	3	1	2	3	1	7	6	1	1	1	1	1	118	LG+C40+F+G
OG0000378	2	4	2	2	2	2	2	2	2	2	3	2	3	4	2	1	2	3	5	2	3	3	3	2	2	3	2	2	5	4	2	10	3	2	3	5	3	2	2	5	2	117	LG+C30+F+G
OG0000379	2	2	2	1	2	5	6	4	3	2	3	2	2	2	3	4	3	4	9	2	2	2	3	2	2	2	4	2	3	2	4	2	4	3	2	2	2	3	2	3	3	117	LG+C20+F+G
OG0000380	2	3	5	2	5	3	2	2	2	2	2	5	1	3	4	4	4	3	5	4	1	1	0	1	3	3	1	0	5	5	2	5	3	3	1	2	3	4	4	4	3	117	LG+C20+F+G
OG0000381	5	0	5	2	4	5	2	4	1	5	0	3	1	1	2	4	4	2	2	4	0	0	0	2	4	1	2	5	6	5	2	4	4	4	0	0	4	6	6	5	0	116	JTT+F+R4
OG0000382	4	4	1	4	1	1	7	3	0	3	1	3	7	1	4	2	1	1	6	3	0	3	4	6	2	5	3	1	1	2	4	1	1	7	5	4	2	1	1	1	5	116	JTT+F+I+G4
OG0000383	4	5	1	2	3	1	1	3	5	3	4	1	2	5	5	3	1	2	7	2	1	3	4	2	2	4	1	8	2	1	1	1	4	2	7	2	1	2	1	1	6	116	LG+C30+F+G
OG0000384	5	1	1	4	1	1	1	3	1	1	1	2	3	3	1	6	1	2	10	2	4	6	4	2	2	1	2	2	11	3	1	1	6	1	5	8	1	1	1	1	3	116	LG+C20+F+G
OG0000385	3	4	3	3	4	3	4	3	2	3	1	3	3	3	2	3	3	4	7	2	1	1	1	3	2	3	4	2	3	3	3	3	2	3	3	2	3	3	3	2	3	116	LG+C50+F+G
OG0000386	2	5	2	2	1	2	3	3	8	3	4	6	1	3	3	1	1	1	10	1	1	5	4	2	2	9	2	2	3	1	2	1	3	1	5	3	1	2	1	1	3	116	LG+C60+F+G
OG0000387	2	4	5	2	2	2	2	2	2	2	2	2	3	3	4	3	4	5	5	2	2	4	1	2	5	3	1	3	3	3	2	3	1	2	2	3	6	2	2	5	2	115	LG+C20+F+G
OG0000388	2	3	2	2	2	3	3	4	0	4	0	3	3	2	3	2	6	1	4	4	1	3	1	2	3	3	1	7	3	3	4	6	3	3	2	3	3	3	3	2	3	115	LG+C20+F+G
OG0000389	1	4	2	5	3	1	2	3	4	2	6	4	3	3	2	2	5	4	5	2	3	3	5	2	2	2	1	5	3	2	1	2	2	3	2	2	3	2	3	2	2	115	LG+C20+F+G
OG0000390	3	2	3	2	3	3	3	2	3	4	2	3	3	3	4	3	4	2	5	5	2	2	2	3	4	1	2	2	2	3	3	1	3	3	2	2	4	4	3	2	3	115	LG+C20+F+G
OG0000391	3	2	2	1	1	5	5	7	5	7	2	4	4	1	2	4	2	1	4	1	3	0	4	3	2	3	2	0	3	2	5	1	3	2	1	2	5	3	3	2	3	115	LG+C50+F+G
OG0000392	1	14	2	8	2	1	1	1	1	1	3	3	4	2	4	1	3	2	8	3	11	5	7	1	2	1	1	3	1	2	1	1	4	1	1	2	1	1	1	2	1	115	JTT+F+I+G4
OG0000393	1	8	1	2	1	6	2	3	2	4	1	1	2	2	5	1	2	2	6	2	3	5	7	1	3	4	1	5	7	1	1	1	1	1	6	8	1	1	1	1	1	114	LG+C40+F+G
OG0000394	2	6	2	4	3	2	2	2	3	2	2	2	3	3	4	3	2	2	8	3	3	4	8	2	2	2	2	3	2	3	2	2	2	2	3	2	2	2	2	2	2	114	LG+C30+F+G
OG0000395	2	0	2	7	2	1	8	8	0	3	2	3	1	0	1	4	2	1	7	3	0	0	0	3	1	0	1	4	0	2	7	4	8	6	0	0	4	3	7	3	4	114	LG+C20+F+G
OG0000396	2	0	7	2	4	3	1	3	2	2	1	2	4	0	2	3	6	4	3	2	3	3	3	2	2	1	2	3	4	4	1	6	3	2	3	1	3	3	2	7	3	114	LG+C30+F+G
OG0000397	3	2	3	3	4	3	3	3	3	3	1	3	2	2	4	2	2	3	4	2	2	3	3	2	2	2	3	2	2	0	3	7	3	3	2	2	6	3	3	3	3	114	LG+C40+F+G
OG0000398	4	11	3	2	2	4	2	2	11	3	1	4	2	2	0	1	1	2	9	4	0	4	1	2	2	3	1	0	6	1	1	1	6	1	3	3	1	2	1	1	4	114	LG+C40+F+G
OG0000399	4	5	1	0	2	3	3	5	0	1	1	8	1	1	1	6	2	0	8	1	0	0	1	3	0	4	1	9	5	1	6	1	5	2	6	2	1	3	1	2	8	114	LG+C20+F+G
OG0000400	4	3	6	1	2	1	2	4	3	2	0	3	1	1	6	10	5	2	5	1	1	1	1	2	7	1	3	1	1	2	2	4	2	2	1	1	7	2	2	7	2	114	LG+C30+F+G
OG0000401	2	7	1	3	1	4	2	4	5	1	6	3	1	4	5	2	3	4	8	1	2	4	6	2	1	1	1	2	2	1	2	1	3	3	2	3	1	2	3	2	3	114	LG+C50+F+G
OG0000402	2	3	7	2	3	2	1	2	2	2	2	2	3	2	6	2	3	1	5	3	4	3	4	2	2	2	2	1	5	2	2	5	2	2	4	4	4	2	2	2	2	113	LG+C30+F+G
OG0000403	3	3	4	2	3	2	3	3	2	2	1	2	2	1	1	5	6	1	8	4	1	1	4	4	4	1	2	1	4	3	2	3	3	3	5	2	1	3	3	3	2	113	LG+C20+F+G
OG0000404	3	14	1	3	2	2	1	4	7	3	2	2	1	1	1	6	4	6	4	0	0	6	6	1	2	5	0	0	6	1	1	1	6	1	1	4	1	1	1	1	1	113	LG+C60+F+G
OG0000405	3	3	4	3	3	4	3	5	2	2	1	2	1	2	3	2	3	0	4	3	1	3	1	4	3	3	2	3	1	3	2	5	4	3	3	3	2	3	4	3	4	113	LG+C20+F+G
OG0000406	1	8	1	3	3	1	1	3	4	1	3	1	1	6	5	1	1	4	9	2	2	5	5	1	2	4	1	6	4	1	1	1	3	1	6	4	1	1	1	3	1	113	JTT+F+R6
OG0000407	2	10	1	3	4	2	2	2	2	2	3	2	2	2	2	3	3	2	5	3	3	3	2	2	3	2	1	2	4	4	2	3	2	2	3	3	6	3	2	2	2	113	LG+C40+F+G
OG0000408	2	5	3	3	2	2	2	3	2	2	1	2	4	5	3	3	2	1	3	3	0	3	1	5	4	5	1	3	2	2	2	2	3	4	4	3	2	4	2	3	5	113	LG+C40+F+G
OG0000409	1	9	3	3	4	2	1	7	1	4	0	4	2	1	3	2	2	3	4	1	1	0	1	1	3	5	3	3	3	2	1	4	3	1	6	3	2	2	2	4	3	110	LG+C40+F+G
OG0000410	0	8	0	2	0	1	5	0	0	9	0	5	1	0	2	3	0	13	1	0	1	2	2	0	0	7	0	0	16	6	0	0	0	1	9	14	4	0	1	0	0	113	LG+C30+F+G
OG0000411	3	1	2	3	5	3	2	3	2	3	3	3	1	3	0	2	2	2	2	1	1	5	3	3	1	1	1	2	2	3	6	6	3	3	1	1	9	3	4	6	2	112	LG+C40+F+G
OG0000412	2	2	6	3	3	2	4	2	2	3	4	2	2	5	5	2	4	4	4	2	1	4	2	2	3	2	2	1	3	2	2	2	2	4	2	3	3	2	2	2	3	112	LG+C30+F+G
OG0000413	5	0	3	0	5	0	0	3	1	4	0	0	0	1	0	7	0	4	0	6	0	0	0	1	2	0	2	1	3	10	1	3	4	0	6	1	7	3	8	18	2	111	LG+C10+F+G
OG0000414	4	1	1	4	1	2	9	3	0	4	1	2	4	2	3	5	2	2	5	1	1	7	2	6	3	5	2	0	2	1	2	1	6	4	5	3	2	1	1	1	1	112	JTT+F+I+G4
OG0000415	1	5	2	3	2	2	2	3	2	2	3	1	2	6	14	2	4	2	4	2	3	5	6	2	3	2	2	1	3	1	2	2	1	2	2	2	3	1	2	2	1	112	LG+C40+F+G
OG0000416	0	3	8	2	1	1	2	2	1	3	2	0	4	0	0	1	6	10	7	1	2	3	1	0	2	3	6	0	4	4	1	5	1	1	7	5	9	2	1	1	0	112	LG+C30+F+G
OG0000417	2	4	5	0	3	6	4	2	2	5	0	1	2	2	1	0	0	8	6	0	1	2	2	2	1	1	1	9	1	1	2	2	3	2	1	2	4	3	3	13	2	111	LG4X
OG0000418	2	3	4	2	2	3	2	2	6	4	2	3	1	1	2	2	5	1	8	2	2	2	2	2	2	2	4	3	1	2	2	3	3	3	2	2	4	3	3	4	3	111	LG+C40+F+G
OG0000419	3	6	2	2	3	2	2	2	1	3	2	3	2	2	2	2	4	1	11	6	1	1	1	2	2	2	2	0	4	4	4	3	3	2	5	2	3	2	3	2	2	111	LG+C20+F+G
OG0000420	4	2	2	3	2	3	4	2	1	2	4	2	3	6	2	1	2	4	9	2	2	0	5	7	2	4	3	1	2	2	1	1	3	5	2	1	2	2	2	2	2	111	LG+C30+F+G
OG0000421	3	4	9	2	3	2	2	2	3	3	1	0	4	1	3	1	2	5	3	1	1	0	3	2	2	3	6	0	4	1	3	5	4	2	4	7	2	2	2	2	2	111	LG+C20+F+G
OG0000422	6	3	1	8	1	1	3	3	0	1	5	2	2	5	2	3	3	2	9	2	1	4	5	4	2	1	2	1	2	1	3	1	7	2	2	3	1	1	1	1	4	111	JTT+F+R5
OG0000423	3	1	4	2	22	3	2	3	2	2	1	2	1	2	1	4	7	1	3	1	1	1	2	2	2	0	2	1	2	4	3	2	3	3	1	1	1	3	4	3	3	111	LG+C40+F+G
OG0000424	5	1	1	2	2	3	5	5	4	5	2	4	5	4	1	2	1	1	1	1	4	4	1	4	2	3	1	0	2	2	5	1	4	6	5	1	1	2	3	1	4	111	LG+C50+F+G
OG0000425	2	6	4	2	0	4	5	3	4	4	2	4	1	2	3	4	1	2	4	7	1	1	1	2	0	0	0	0	1	5	3	9	3	3	0	1	5	3	3	3	3	111	LG+C40+F+G
OG0000426	0	0	3	3	0	0	0	0	0	0	56	0	9	1	0	0	1	6	1	3	3	0	0	0	3	2	2	0	2	0	0	1	0	0	6	6	1	0	0	2	0	111	WAG+F+R4
OG0000427	0	0	0	0	0	1	1	0	0	0	0	0	0	0	0	0	0	1	0	0	0	0	0	0	0	0	0	0	0	0	1	0	1	0	104	1	0	1	0	0	0	111	JTT+F+I+G4
OG0000428	2	2	3	2	2	2	2	2	4	3	1	2	2	1	1	1	1	1	4	5	3	2	5	1	3	2	1	2	2	3	3	1	1	3	2	2	19	1	2	8	1	110	LG+C40+F+G
OG0000429	4	8	1	3	2	1	4	2	1	4	2	6	1	2	4	1	1	1	1	3	2	4	7	5	4	2	1	2	4	1	1	1	4	3	2	4	1	4	1	1	4	110	JTT+F+G4
OG0000430	2	7	2	1	2	2	2	2	4	2	3	3	2	1	2	1	3	1	6	3	4	3	3	3	2	4	2	0	3	3	2	2	2	2	5	3	7	2	2	3	2	110	LG+C30+F+G
OG0000431	2	1	10	2	7	3	3	2	3	4	1	2	1	3	3	4	2	1	4	2	1	1	1	2	2	1	9	1	1	3	3	2	2	3	1	1	4	3	3	5	1	110	LG+C20+F+G
OG0000432	2	8	2	5	3	1	1	1	2	1	2	1	1	4	5	1	2	4	10	2	1	5	5	1	1	4	1	5	6	1	1	1	1	1	4	7	2	1	1	1	2	110	LG+C20+F+G
OG0000433	1	5	4	2	2	2	2	1	1	2	2	2	3	2	4	1	3	1	3	2	3	1	2	1	4	3	3	1	3	3	1	9	1	2	3	2	14	1	2	4	2	110	LG+C40+F+G
OG0000434	2	4	3	4	3	2	3	4	3	3	2	2	2	3	5	2	2	3	7	1	2	4	3	2	3	2	2	1	3	2	2	3	2	2	4	1	2	2	3	2	2	109	LG+C20+F+G
OG0000435	5	4	2	0	2	4	4	1	1	3	3	6	0	1	1	5	1	0	3	4	0	3	1	7	2	6	0	5	2	2	2	2	4	4	3	3	2	3	2	1	5	109	JTT+F+R5
OG0000436	3	3	4	2	3	2	3	3	5	3	1	2	1	2	1	2	3	4	11	2	2	1	2	2	1	1	1	1	2	6	3	3	3	3	3	1	3	3	3	3	2	109	LG+C20+F+G
OG0000437	2	3	2	5	1	3	3	2	3	3	2	2	3	3	2	2	4	2	8	3	2	4	2	2	3	1	1	2	2	2	2	4	2	3	3	3	2	2	3	2	4	109	LG+C40+F+G
OG0000438	7	1	1	1	1	8	6	7	7	8	0	0	1	1	0	0	0	1	1	1	1	0	0	6	1	0	1	0	2	1	8	1	7	8	1	0	1	5	6	1	7	109	JTT+F+G4
OG0000439	4	4	2	3	3	3	2	4	2	5	3	2	2	3	3	2	2	2	4	3	2	1	2	3	2	4	2	2	2	2	3	2	3	5	1	2	2	3	2	2	4	109	LG+C40+F+G
OG0000440	1	8	2	1	2	1	1	1	6	1	1	5	1	3	2	2	1	2	5	1	3	7	10	1	3	2	0	4	7	2	1	1	1	2	7	6	1	1	1	1	1	109	LG+C60+F+G
OG0000441	5	2	1	1	1	3	3	3	5	4	2	1	1	2	2	1	1	4	3	4	2	4	4	4	3	1	3	3	1	1	3	2	7	3	2	4	1	4	3	1	4	109	JTT+F+R5
OG0000442	1	3	1	8	1	1	2	4	2	6	4	1	9	3	5	1	2	3	9	1	0	0	0	2	2	1	2	0	6	1	1	1	6	1	5	7	1	1	1	2	2	109	JTT+F+I+G4
OG0000443	2	5	2	1	3	2	3	3	4	2	1	3	3	5	1	3	2	2	5	2	2	3	1	2	4	3	4	4	2	2	2	3	2	3	2	2	2	2	3	3	3	108	LG+C40+F+G
OG0000444	3	6	2	2	2	2	1	3	1	2	2	1	5	5	1	3	3	4	4	2	2	1	2	1	3	4	1	4	2	5	3	4	3	3	3	1	2	1	2	4	3	108	JTT+F+I+G4
OG0000445	1	4	7	5	2	1	2	1	5	1	0	2	2	2	3	6	2	2	7	2	1	2	2	1	1	1	0	4	6	1	3	3	7	2	3	4	1	3	3	1	2	108	LG+C60+F+G
OG0000446	1	0	9	3	25	1	1	2	3	3	1	1	7	1	3	0	4	4	4	4	2	2	3	1	3	0	2	0	3	2	1	4	1	1	0	0	0	1	1	3	1	108	LG+C40+F+G
OG0000447	3	3	1	7	2	3	4	2	4	4	0	3	11	2	3	10	1	0	2	2	0	2	1	1	2	2	0	4	6	1	1	1	6	1	3	2	1	1	1	2	3	108	LG+C20+F+G
OG0000448	2	2	3	3	8	1	1	3	2	2	4	3	2	3	3	4	3	2	1	5	3	3	3	1	3	3	2	1	2	3	2	4	2	1	3	2	5	2	2	2	2	108	LG+C40+F+G
OG0000449	1	6	5	2	2	2	1	3	2	2	4	2	4	3	1	1	3	3	4	7	2	3	2	1	2	2	2	0	1	7	2	2	1	1	5	3	4	3	2	4	1	108	LG+C40+F+G
OG0000450	0	0	25	0	3	0	0	5	2	3	2	3	0	0	2	0	0	2	2	0	0	0	1	1	0	1	0	0	13	0	0	0	0	0	3	5	24	3	2	4	2	108	LG+C20+F+G
OG0000451	4	1	1	1	2	4	4	4	4	5	1	4	2	2	1	1	1	1	7	16	1	1	1	2	1	1	1	1	1	1	4	2	3	3	1	1	4	5	2	1	4	107	LG+C20+F+G
OG0000452	2	4	5	2	3	2	2	2	1	2	3	3	2	3	3	2	2	3	7	2	2	3	2	2	4	2	2	4	2	2	2	3	2	3	2	3	3	2	2	3	2	107	LG+C20+F+G
OG0000453	4	2	4	1	2	5	2	3	3	3	3	1	2	1	5	1	1	2	4	5	1	6	3	1	1	2	2	0	3	2	2	2	3	4	2	4	1	2	2	7	3	107	LG+C20+F+G
OG0000454	2	5	1	5	1	1	4	6	2	6	1	1	3	2	4	1	2	1	5	2	0	2	4	2	1	2	2	2	5	3	4	2	6	2	3	3	2	3	2	1	1	107	LG+C40+F+G
OG0000455	3	3	3	1	3	2	4	4	3	3	2	3	3	2	2	2	3	1	6	2	1	1	3	3	2	2	2	3	2	4	3	3	2	3	2	2	2	3	3	3	3	107	LG+C40+F+G
OG0000456	0	3	21	0	1	0	1	3	0	7	0	0	2	0	1	1	0	4	2	1	0	1	0	3	0	3	3	5	8	0	4	2	2	4	12	3	3	0	3	4	0	107	LG+C10+F+G
OG0000457	2	2	5	2	2	2	2	2	2	2	2	2	1	1	3	6	6	3	7	3	2	4	1	2	3	3	2	1	3	3	2	4	2	2	2	2	3	2	2	2	2	106	LG+C50+F+G
OG0000458	6	8	1	1	1	4	6	2	1	1	3	1	3	4	6	2	1	2	6	1	1	1	2	1	2	2	2	4	5	2	2	2	3	4	2	3	2	1	2	2	1	106	JTT+F+R5
OG0000459	2	2	2	2	2	4	4	3	5	5	2	2	3	2	2	2	4	2	3	3	3	2	2	2	2	2	2	2	1	2	3	3	3	3	2	2	2	3	4	2	3	106	LG+C50+F+G
OG0000460	2	3	3	3	2	0	1	0	1	1	2	1	3	2	3	1	1	4	7	3	4	2	3	1	2	3	1	9	4	3	1	10	1	1	1	1	6	1	2	5	2	106	LG4X
OG0000461	1	8	1	4	1	1	1	1	1	1	3	2	1	2	4	1	1	4	11	1	3	7	7	1	3	3	3	3	2	1	1	1	3	1	6	6	0	1	1	2	1	106	LG+C50+F+G
OG0000462	2	4	3	1	2	2	2	2	3	2	2	3	2	1	2	2	3	1	6	3	1	1	3	3	2	3	2	5	4	1	3	5	2	2	3	3	2	2	4	4	3	106	LG+C30+F+G
OG0000463	2	6	2	3	2	3	3	3	5	3	3	2	2	2	3	3	2	4	4	2	2	1	5	2	2	3	5	2	2	2	3	2	3	2	1	3	0	2	2	1	2	106	LG+C10+F+G
OG0000464	1	13	2	2	1	1	1	2	4	1	1	4	1	3	1	2	2	3	9	1	1	7	8	1	3	3	1	2	3	1	1	1	3	2	5	2	1	1	2	2	1	106	JTT+F+I+G4
OG0000465	1	9	6	5	6	1	2	2	8	2	2	3	1	3	3	1	1	2	7	2	3	3	4	1	1	1	1	2	1	1	1	1	1	2	4	4	1	2	1	2	2	106	LG+C50+F+G
OG0000466	2	2	2	2	1	2	2	2	9	1	2	4	5	5	4	3	1	0	5	1	3	4	5	1	4	1	0	1	7	1	1	2	3	3	4	4	1	1	1	1	2	105	LG+C40+F+G
OG0000467	2	1	9	6	1	2	2	2	2	2	2	2	3	1	1	1	3	3	4	1	2	4	4	2	1	1	4	2	2	4	2	5	2	2	2	1	1	2	2	8	2	105	LG+C30+F+G
OG0000468	3	1	2	3	3	1	2	1	4	3	2	6	1	3	2	2	1	2	7	3	2	3	3	5	2	4	2	2	4	2	3	1	2	3	2	3	2	1	2	1	4	105	JTT+F+G4
OG0000469	3	0	0	0	2	1	8	6	1	4	0	2	0	0	0	0	0	0	0	18	0	0	0	1	0	0	0	1	0	7	9	0	6	9	0	0	2	6	8	9	2	105	LG+C40+F+G
OG0000470	3	1	4	1	1	2	2	3	2	2	0	2	1	9	2	1	3	3	3	1	1	1	1	2	0	1	1	1	1	4	3	1	3	1	1	1	14	2	2	16	2	105	LG+C20+F+G
OG0000471	2	0	3	4	7	3	4	2	2	5	2	3	0	3	0	3	2	0	3	3	0	0	0	3	4	3	0	2	4	5	4	6	2	5	2	0	2	3	3	3	3	105	JTT+F+G4
OG0000472	2	2	2	2	3	2	2	2	2	2	2	3	2	3	1	4	11	2	7	0	1	1	2	2	3	1	2	3	2	5	2	4	2	2	2	2	3	2	2	4	2	105	LG+C40+F+G
OG0000473	4	3	6	3	1	4	2	3	4	2	2	5	1	5	5	2	1	2	2	1	3	4	5	2	1	1	0	1	4	1	2	1	6	2	3	2	1	2	2	1	3	105	JTT+F+I+G4
OG0000474	1	8	1	3	1	3	3	2	3	2	3	3	1	4	4	2	2	4	8	1	6	4	4	1	2	1	1	2	1	1	1	1	2	3	1	4	1	2	3	3	2	105	LG+C40+F+G
OG0000475	3	0	3	1	6	2	3	3	1	4	2	1	1	2	4	1	2	2	5	4	3	0	3	3	2	2	2	5	2	2	4	6	4	2	3	0	2	3	2	3	2	105	LG+C40+F+G
OG0000476	4	1	3	1	3	4	3	4	3	4	1	3	1	1	2	2	4	1	6	1	1	1	1	4	2	1	1	1	1	2	4	1	4	4	1	1	6	4	4	4	4	104	LG+C50+F+G
OG0000477	1	8	1	2	3	2	1	1	3	2	4	1	2	4	7	3	0	3	13	4	2	4	3	1	2	1	3	3	1	2	1	1	1	2	1	1	3	1	1	4	1	104	LG+C50+F+G
OG0000478	4	4	4	2	2	2	3	3	4	4	2	2	1	2	2	1	3	2	2	2	5	3	2	3	2	3	3	1	3	2	2	2	4	2	2	2	1	4	2	2	3	104	LG+C20+F+G
OG0000479	3	8	5	2	1	1	1	2	6	1	2	1	0	6	2	2	1	3	9	1	1	5	4	1	2	1	1	2	2	2	2	1	2	3	6	2	1	1	3	4	1	104	LG+C40+F+G
OG0000480	1	3	1	1	4	1	1	1	3	1	4	2	1	3	4	1	1	3	9	3	5	4	7	3	3	3	2	1	5	1	2	1	1	1	5	2	1	1	1	6	1	104	LG+C20+F+G
OG0000481	3	6	3	2	2	2	4	2	6	3	3	2	2	1	4	2	2	4	2	4	2	5	3	2	2	2	2	3	2	1	2	2	2	2	2	2	2	1	2	2	2	104	LG+C40+F+G
OG0000482	1	4	2	2	1	1	2	3	2	5	1	1	2	1	4	2	2	2	4	3	5	6	4	1	2	2	1	1	7	2	2	2	3	2	4	6	2	2	2	2	1	104	LG+C20+F+G
OG0000483	2	0	2	3	1	2	3	4	4	2	4	1	3	2	3	7	1	2	8	2	3	0	0	2	3	5	2	1	4	2	4	2	2	3	2	0	2	3	2	3	2	103	LG+C30+F+G
OG0000484	4	2	2	1	2	1	6	2	2	2	2	1	2	1	3	4	1	1	3	6	3	2	3	3	4	1	1	1	1	3	4	4	2	3	5	2	2	2	3	6	1	104	LG+C30+F+G
OG0000485	1	0	0	0	0	19	16	5	9	10	0	0	0	0	0	0	0	0	0	0	0	0	0	3	0	0	0	0	0	1	6	0	3	7	0	0	0	4	11	0	8	103	LG4X
OG0000486	2	6	1	2	2	4	2	1	4	2	5	3	1	8	2	1	2	5	7	2	11	5	5	2	1	1	1	1	2	1	1	1	1	2	1	1	1	1	1	1	1	104	JTT+F+I+G4
OG0000487	1	0	5	0	20	1	1	1	1	1	3	1	0	15	3	10	1	0	10	9	0	0	0	1	5	0	2	0	0	0	1	2	1	1	0	0	2	1	1	3	1	104	C60
OG0000488	0	2	7	0	0	0	0	0	1	1	4	2	3	3	18	1	3	1	13	1	1	1	1	0	2	1	4	1	3	2	1	8	0	0	2	6	6	0	0	5	0	104	LG+C20+F+G
OG0000489	0	0	3	2	3	5	2	0	0	1	0	6	0	0	8	2	0	0	3	0	2	1	1	0	0	0	2	19	2	0	0	1	5	0	0	0	32	3	0	1	0	104	LG+C30+F+G
OG0000490	3	3	4	1	6	3	2	1	4	2	1	2	2	0	3	4	4	1	8	4	0	0	0	3	2	0	2	3	1	5	3	4	2	2	3	3	3	2	1	4	2	103	JTT+F+I+G4
OG0000491	2	3	7	2	3	2	2	2	2	2	3	1	0	2	3	3	4	1	4	5	3	1	1	2	4	1	1	2	3	3	2	4	2	2	4	1	3	2	3	3	3	103	LG+C30+F+G
OG0000492	2	2	2	5	3	2	2	3	2	2	3	2	2	4	2	4	3	4	4	2	4	4	4	2	2	2	2	0	4	1	3	2	2	2	2	2	2	2	2	2	2	103	LG+C20+F+G
OG0000493	1	13	1	2	3	1	1	3	3	1	4	2	1	5	3	2	2	4	6	1	5	2	3	1	1	3	1	2	2	4	1	2	4	1	1	5	1	1	1	2	1	103	LG+C60+F+G
OG0000494	2	0	1	4	1	2	4	6	1	5	2	1	0	3	4	3	1	2	7	1	0	0	0	6	1	0	3	5	0	1	7	2	7	9	0	0	1	1	1	2	7	103	LG+C30+F+G
OG0000495	2	4	2	5	3	1	1	2	2	1	1	3	1	2	2	3	1	1	7	3	4	5	6	1	1	3	1	2	4	1	1	1	4	3	6	6	1	1	1	2	2	103	JTT+F+R4
OG0000496	1	6	1	2	1	2	1	1	1	1	2	1	5	6	2	5	1	2	10	2	2	7	3	1	1	1	3	2	1	1	1	1	8	2	2	4	1	1	2	1	5	103	JTT+F+G4
OG0000497	1	5	2	4	2	1	1	1	2	5	2	1	1	1	4	4	1	2	4	2	1	5	2	1	2	4	0	6	5	1	1	1	5	1	2	4	1	1	1	6	7	103	JTT+F+R6
OG0000498	7	0	5	0	0	4	9	6	4	4	0	3	0	0	0	0	1	0	4	0	0	0	0	5	0	0	0	0	0	8	6	4	1	8	0	0	5	5	5	4	4	102	JTT+F+R4
OG0000499	3	0	3	3	4	2	2	3	2	4	0	3	1	1	2	8	2	2	9	1	1	0	0	4	1	1	2	2	2	2	3	2	4	3	1	2	4	3	3	4	3	102	LG+C30+F+G
OG0000500	2	2	2	3	2	2	2	2	2	2	2	2	2	4	3	2	4	3	2	2	2	7	7	2	2	3	2	1	3	2	2	2	2	2	3	3	2	2	2	2	2	102	C60
OG0000501	1	6	1	5	2	1	2	1	5	2	0	1	2	3	5	4	3	2	9	2	1	3	3	1	1	3	1	2	5	1	2	2	1	1	4	6	1	2	1	2	2	102	LG+C20+F+G
OG0000502	0	6	6	2	0	1	1	1	1	1	6	6	3	5	1	3	1	3	6	7	1	3	3	1	2	5	3	0	5	2	0	4	0	1	3	4	0	1	1	2	1	102	LG+C40+F+G
OG0000503	0	2	1	6	1	4	3	4	4	3	2	2	1	5	1	3	2	2	8	1	1	2	4	2	3	2	1	2	3	1	4	1	6	2	1	2	1	1	2	4	2	102	LG+C20+F+G
OG0000504	1	3	1	4	2	2	3	3	3	2	1	0	4	1	1	5	3	2	20	3	1	2	1	2	1	1	1	2	1	1	2	2	3	3	4	1	2	2	2	3	0	101	LG+C40+F+G
OG0000505	4	5	1	7	2	1	2	1	0	2	1	2	5	1	5	2	1	0	7	3	1	3	0	4	2	3	0	2	3	2	1	1	6	2	5	4	1	1	2	1	5	101	LG+C20+F+G
OG0000506	1	5	3	4	5	1	1	1	0	1	2	1	8	2	2	1	2	2	8	2	2	2	1	1	3	3	2	1	5	1	1	1	1	1	4	7	8	1	1	2	1	101	LG+C20+F+G
OG0000507	2	2	1	1	1	1	2	4	6	6	0	3	4	5	4	2	3	1	6	2	1	2	1	1	2	3	0	4	2	1	3	1	7	3	4	1	1	2	2	1	3	101	JTT+F+G4
OG0000508	3	2	1	1	1	4	3	3	3	3	2	3	1	4	2	3	0	4	8	3	1	3	2	2	4	2	2	0	3	3	1	2	3	4	3	0	2	3	4	0	3	101	LG+C20+F+G
OG0000509	4	1	2	2	2	1	2	6	5	1	3	4	2	3	3	3	1	5	9	2	0	1	0	2	2	2	1	2	6	1	2	1	3	2	0	4	1	1	2	2	5	101	LG+C20+F+G
OG0000510	2	3	1	2	2	2	2	3	3	2	1	3	2	3	3	1	2	3	4	2	2	4	7	2	3	2	1	1	3	2	2	3	2	2	4	4	3	2	2	2	2	101	C60
OG0000511	1	3	1	2	2	1	5	2	4	4	2	2	1	3	5	1	2	3	6	2	0	4	2	1	2	2	1	1	8	1	3	1	4	4	3	3	1	1	1	2	3	100	LG+C20+F+G
OG0000512	2	3	4	7	3	6	3	0	0	2	0	1	18	1	5	6	1	13	1	0	0	3	1	1	0	4	0	0	2	2	0	0	2	1	4	1	1	1	0	1	0	100	LG+C20+F+G
OG0000513	2	3	2	1	2	3	3	3	4	4	2	2	2	4	1	1	2	2	3	2	2	2	0	1	0	2	1	3	1	3	3	8	4	3	2	4	3	3	3	1	3	100	LG+C20+F+G
OG0000514	1	4	1	5	2	2	1	1	8	2	4	2	1	4	1	1	1	2	6	3	9	7	6	1	5	1	1	4	1	1	1	1	1	1	1	2	1	1	1	1	1	100	JTT+F+I+G4
OG0000515	2	1	3	1	13	1	3	3	2	3	1	3	1	1	1	2	3	1	5	3	3	1	1	2	2	1	1	1	1	3	3	3	4	4	1	1	2	4	3	5	1	100	LG+C40+F+G
OG0000516	1	2	11	2	4	1	2	2	1	1	1	5	1	4	4	1	1	1	10	1	2	6	5	1	3	1	1	0	2	1	1	1	2	2	2	2	1	2	2	5	2	100	JTT+F+R6
OG0000517	2	4	3	3	2	2	2	2	2	2	2	2	2	3	2	4	4	2	6	2	4	3	2	2	2	2	2	3	1	2	2	3	2	2	2	2	2	1	2	4	2	100	LG+C40+F+G
OG0000518	1	9	2	2	1	1	2	1	2	2	4	2	4	5	1	4	1	3	1	4	2	1	2	2	2	3	2	0	2	2	2	4	3	2	4	1	6	2	2	2	2	100	LG+C40+F+G
OG0000519	1	10	2	3	1	1	1	2	2	1	0	3	1	3	5	5	8	2	5	2	2	5	5	1	4	2	0	1	1	2	3	1	2	1	3	2	1	1	1	3	1	100	JTT+F+G4
OG0000520	1	6	1	1	1	1	1	2	5	1	5	1	1	5	5	1	3	3	8	2	2	5	3	1	3	1	2	2	2	2	3	1	4	1	2	4	2	1	1	1	3	100	LG+C40+F+G
OG0000521	2	9	1	2	2	1	1	1	3	1	2	2	1	5	3	1	1	2	9	0	2	2	5	1	2	3	1	2	4	1	3	1	4	2	4	8	1	1	1	1	1	99	LG+C60+F+G
OG0000522	3	2	3	2	4	3	3	3	4	3	2	3	3	2	1	4	2	2	3	2	1	1	1	3	1	1	2	0	1	3	3	2	3	3	1	2	5	3	3	3	3	99	LG+C30+F+G
OG0000523	5	0	1	5	4	1	2	1	1	2	1	1	1	4	6	3	1	2	9	1	1	1	1	1	1	3	2	1	4	1	1	1	3	2	3	9	1	1	1	2	8	99	JTT+F+I+G4
OG0000524	3	7	1	3	1	1	1	5	9	2	2	2	1	2	4	1	1	2	6	2	1	2	1	1	1	3	0	5	1	1	2	1	3	2	4	7	1	1	1	3	2	99	JTT+F+I+G4
OG0000525	2	0	4	2	0	5	5	3	2	2	5	2	2	6	6	6	1	1	8	7	0	0	0	2	4	0	1	2	1	1	1	2	2	2	0	0	1	2	2	5	2	99	LG+C60+F+G
OG0000526	1	1	1	5	2	1	2	5	3	1	3	1	1	1	1	1	1	3	6	3	1	5	1	1	1	3	3	4	4	1	5	3	6	1	5	3	1	1	1	2	4	99	LG+C40+F+G
OG0000527	2	5	3	2	4	2	2	2	2	2	3	2	2	3	2	2	3	2	3	2	1	2	1	2	2	3	1	5	2	3	2	2	2	2	2	3	2	2	2	6	2	99	LG+C10+F+G
OG0000528	2	3	2	3	2	2	2	3	2	3	2	2	2	3	4	3	2	3	2	2	3	3	4	2	3	2	2	3	3	2	1	4	2	2	3	2	2	2	2	2	1	99	LG4M
OG0000529	2	2	2	2	2	2	2	2	4	2	3	3	3	4	3	2	3	1	7	2	2	4	0	2	3	2	0	1	2	3	2	3	0	2	3	5	2	2	2	4	2	99	LG+C20+F+G
OG0000530	1	2	32	2	1	5	5	0	0	0	0	0	7	2	4	1	0	0	5	0	0	0	0	3	0	1	0	1	3	1	2	7	1	1	0	4	4	0	3	1	0	99	LG+C10+F+G
OG0000531	1	4	2	4	1	2	2	3	2	1	1	4	3	3	2	3	1	2	6	1	0	6	5	1	3	4	1	4	2	1	1	1	1	3	4	6	1	3	1	1	2	99	WAG+F+I+G4
OG0000532	1	5	1	1	0	1	5	7	1	4	0	3	3	4	3	4	10	0	1	1	0	0	0	1	6	0	0	0	2	4	2	7	3	4	2	0	1	5	2	1	4	99	JTT+F+I+G4
OG0000533	1	5	2	3	4	2	1	2	3	1	2	3	1	4	3	2	1	2	9	2	2	4	7	1	2	3	2	1	1	1	1	2	1	2	3	5	2	1	1	2	2	99	LG+C50+F+G
OG0000534	7	0	1	0	1	5	8	7	0	4	0	5	0	0	0	0	1	0	3	1	1	0	0	4	1	0	0	0	0	1	13	6	4	7	0	2	0	6	4	1	5	98	JTT+F+R4
OG0000535	9	0	1	2	1	2	5	4	1	2	0	8	6	0	1	5	1	1	10	1	0	0	3	5	0	0	0	0	0	2	7	1	2	1	4	0	1	1	1	1	9	98	LG+C30+F+G
OG0000536	2	3	3	2	3	3	2	1	2	2	2	2	1	1	2	3	3	1	5	2	1	2	2	2	3	2	3	1	3	3	3	4	3	3	3	3	3	2	2	2	3	98	LG+C10+F+G
OG0000537	2	5	4	1	1	3	3	3	5	2	2	5	2	4	1	1	1	3	6	1	3	7	4	1	1	1	1	0	1	1	2	1	3	2	1	4	1	2	4	1	2	98	JTT+F+I+G4
OG0000538	1	5	2	2	0	5	5	0	0	7	0	8	0	0	3	2	1	14	3	0	1	4	1	1	0	10	0	0	7	2	1	6	0	0	1	2	0	0	3	0	1	98	LG+C20+F+G
OG0000539	2	7	2	2	4	1	2	2	2	1	2	2	1	3	3	1	2	3	5	3	1	6	5	1	3	3	2	1	3	2	1	1	2	2	2	5	1	1	2	2	2	98	LG+C60+F+G
OG0000540	1	3	1	3	2	1	1	1	2	1	1	1	1	2	5	2	1	3	8	3	0	5	2	1	1	6	1	6	7	5	1	3	1	1	5	1	2	1	1	2	3	98	LG+C60+F+G
OG0000541	4	0	1	0	2	1	8	5	0	8	0	4	0	0	0	7	1	0	4	0	0	0	0	1	2	7	0	3	9	1	3	3	2	5	2	0	1	7	2	1	4	98	LG+C20+F+G
OG0000542	3	1	5	2	5	2	3	2	3	2	3	2	2	1	3	1	4	2	6	4	2	2	4	2	2	1	3	0	1	3	2	2	2	2	3	2	1	3	1	2	2	98	LG+C40+F+G
OG0000543	3	1	4	1	0	3	4	3	4	4	1	4	1	1	1	1	5	1	4	1	1	1	1	4	1	1	1	2	1	3	4	6	4	3	1	1	6	3	3	1	3	98	LG+C40+F+G
OG0000544	1	3	3	5	1	1	3	2	1	1	3	1	1	5	3	3	1	2	5	1	1	3	3	1	3	2	1	2	3	1	5	1	5	1	4	2	1	1	1	1	10	98	LG+C40+F+G
OG0000545	3	6	0	3	0	1	5	4	0	3	2	6	1	2	0	4	1	1	5	2	1	6	2	4	1	2	1	0	1	1	4	0	6	1	4	3	0	1	1	3	6	97	LG+C20+F+G
OG0000546	3	1	1	1	1	3	4	3	5	3	1	1	1	1	1	0	2	1	4	2	1	1	2	3	1	1	1	0	1	5	5	1	1	4	1	1	19	1	4	1	4	97	LG+C40+F+G
OG0000547	2	3	1	6	2	1	1	2	4	1	2	2	1	5	3	2	1	2	13	2	1	3	1	2	3	3	2	2	3	1	1	1	4	1	2	5	2	1	1	1	1	97	LG+C50+F+G
OG0000548	3	2	2	2	3	4	4	2	4	3	1	2	1	5	2	1	3	2	2	1	1	3	2	3	1	1	1	1	3	2	1	2	3	4	3	1	3	3	4	2	4	97	LG+C20+F+G
OG0000549	5	0	1	3	1	3	6	5	2	3	1	3	1	1	3	5	1	0	2	3	0	0	2	6	2	4	2	3	0	1	4	1	5	7	4	0	1	1	1	1	3	97	LG+C20+F+G
OG0000550	2	3	2	2	2	2	3	2	1	3	3	2	2	2	1	2	2	3	7	2	1	3	2	2	2	2	2	4	2	2	1	2	2	3	2	3	4	2	2	2	4	97	LG+C40+F+G
OG0000551	2	3	2	2	2	2	2	2	3	4	2	2	2	3	4	3	2	2	6	2	4	1	2	2	3	2	3	2	3	1	2	2	2	2	2	2	2	2	2	3	1	97	LG+C20+F+G
OG0000552	3	0	0	0	2	0	18	4	1	5	0	0	0	0	0	4	2	0	6	4	0	1	0	1	0	0	0	0	0	1	6	5	9	16	0	0	1	3	4	1	0	97	LG+C40+F+G
OG0000553	2	3	2	4	3	2	2	2	1	2	4	2	4	1	1	3	2	3	3	1	2	3	2	3	2	3	2	2	3	2	2	2	2	2	4	3	2	2	3	2	2	97	C60
OG0000554	2	5	2	1	6	3	6	2	0	3	0	4	1	0	1	1	3	0	4	2	0	2	0	2	1	1	1	0	3	5	4	2	2	4	2	2	3	5	4	2	6	97	JTT+F+G4
OG0000555	2	4	2	2	3	2	2	2	3	2	3	2	2	2	1	2	2	3	4	2	3	2	4	2	3	2	2	3	3	2	2	3	2	2	2	3	2	2	2	2	2	97	LG+C40+F+G
OG0000556	1	5	1	3	1	4	4	2	3	2	2	1	1	4	2	4	1	2	5	1	1	3	3	1	2	6	1	0	3	1	2	1	3	6	2	6	1	2	2	1	1	97	JTT+F+R4
OG0000557	1	5	4	3	1	1	1	1	3	1	4	3	1	3	3	2	2	6	6	4	2	6	5	1	3	1	2	2	3	1	1	2	1	1	2	4	0	1	1	2	1	97	JTT+F+I+G4
OG0000558	3	8	3	8	3	2	2	1	7	3	1	2	1	3	2	1	2	0	6	3	1	2	1	1	2	3	2	1	2	1	4	4	2	2	0	0	2	1	1	1	2	96	JTT+F+I+G4
OG0000559	3	2	3	2	3	3	3	2	3	2	2	3	1	3	2	2	2	1	3	4	2	1	1	3	2	2	2	1	2	3	3	2	3	3	2	2	2	3	2	4	2	96	LG4M
OG0000560	2	9	2	3	1	2	1	2	3	1	1	1	6	3	3	1	1	3	7	3	1	5	2	2	3	3	1	4	1	2	1	1	2	1	4	2	1	1	1	1	2	96	LG+C20+F+G
OG0000561	3	7	2	1	2	2	2	2	2	2	2	4	4	3	1	3	2	2	5	2	3	1	0	1	2	3	1	0	4	2	3	1	2	3	3	2	3	2	2	2	3	96	LG+C40+F+G
OG0000562	2	1	2	4	2	2	2	2	3	1	2	2	2	2	1	2	2	3	6	3	4	1	2	3	2	2	3	3	2	3	2	2	2	2	2	3	2	2	3	2	3	96	LG+C40+F+G
OG0000563	4	6	1	5	1	1	2	5	0	2	0	4	4	1	4	2	2	0	5	1	0	1	1	4	2	2	1	1	1	2	5	1	6	1	1	6	1	1	1	3	5	96	JTT+F+G4
OG0000564	5	5	1	6	1	2	2	5	0	4	1	1	4	1	2	5	2	4	1	2	1	3	3	1	1	2	0	3	1	2	2	2	4	1	5	2	0	3	1	2	3	96	LG+C20+F+G
OG0000565	2	4	1	2	1	1	7	3	3	1	1	4	4	2	2	1	3	2	2	3	0	0	1	5	1	3	1	3	6	1	1	2	4	5	1	1	1	3	4	1	3	96	LG+C20+F+G
OG0000566	3	6	3	1	3	2	2	7	3	2	1	2	4	2	1	1	2	0	1	3	2	1	2	3	2	1	1	2	2	4	2	2	3	3	4	2	2	3	2	2	2	96	LG+C20+F+G
OG0000567	2	0	1	2	1	3	3	4	4	4	3	4	5	1	0	0	2	0	4	1	2	1	3	3	0	1	1	0	1	8	3	7	3	3	1	1	1	3	3	4	3	96	LG+C30+F+G
OG0000568	2	7	1	6	1	1	1	2	2	1	2	2	5	6	5	1	1	5	8	1	1	1	1	1	0	4	1	2	5	1	1	1	2	1	4	5	1	1	1	0	2	96	JTT+F+G4
OG0000569	2	2	2	3	4	3	1	2	3	3	1	2	4	4	2	1	3	2	3	3	2	0	1	3	3	3	2	3	2	2	3	4	3	2	3	0	2	2	2	2	2	96	LG+C20+F+G
OG0000570	2	6	2	1	1	2	1	2	1	1	1	3	1	3	3	1	5	1	5	1	2	3	5	1	3	4	3	0	3	5	2	1	3	1	4	5	2	1	2	2	1	96	LG+C30+F+G
OG0000571	3	0	2	1	0	14	19	2	0	11	0	6	0	0	0	0	1	0	1	0	0	0	0	2	0	0	0	0	0	0	1	3	0	2	0	0	14	2	9	0	3	96	LG+C30+F+G
OG0000572	1	7	1	1	2	1	1	1	6	3	2	1	1	2	3	3	1	1	8	2	1	4	4	1	2	3	1	4	5	2	2	1	2	2	1	5	1	1	1	4	1	96	LG+C40+F+G
OG0000573	1	2	22	1	3	2	1	1	1	1	2	1	1	1	2	1	1	4	6	0	2	1	1	1	1	1	1	0	1	4	1	2	1	2	1	1	9	1	1	9	1	96	LG+C20+F+G
OG0000574	2	3	1	1	2	2	2	2	2	2	1	2	1	3	7	7	2	1	6	2	1	1	3	2	2	1	1	2	1	2	2	9	2	2	1	2	2	2	2	4	1	96	LG+C20+F+G
OG0000575	1	2	1	4	5	1	1	1	2	2	3	1	2	2	3	0	0	2	4	2	2	1	2	1	1	1	1	8	2	1	1	17	1	1	2	1	4	1	2	5	2	96	C60
OG0000576	3	0	3	2	3	3	3	2	1	2	3	3	3	2	1	2	3	2	5	2	1	0	1	3	2	1	2	3	2	5	2	3	2	1	2	2	3	2	2	5	4	96	LG+C20+F+G
OG0000577	2	3	3	2	2	3	3	2	2	2	2	2	2	3	2	2	2	1	6	2	4	5	2	2	2	2	4	1	1	3	2	2	2	2	2	3	0	2	2	2	3	96	LG+C20+F+G
OG0000578	1	2	1	5	2	1	1	1	2	1	2	1	5	4	4	1	1	3	6	2	0	4	4	1	3	1	1	1	1	19	1	1	1	1	2	3	1	1	1	1	2	96	LG+C20+F+G
OG0000579	0	0	96	0	0	0	0	0	0	0	0	0	0	0	0	0	0	0	0	0	0	0	0	0	0	0	0	0	0	0	0	0	0	0	0	0	0	0	0	0	0	96	JTT+F+R5
OG0000580	1	6	3	2	3	1	1	2	4	1	3	1	2	4	2	2	2	2	9	4	2	2	5	2	3	2	2	2	1	2	1	3	1	1	2	1	2	1	1	3	1	95	LG+C30+F+G
OG0000581	3	3	2	3	0	3	3	3	2	3	0	2	2	1	1	3	2	1	6	1	1	3	3	4	1	3	2	0	3	1	3	1	3	3	4	3	2	3	3	1	4	95	LG+C20+F+G
OG0000582	1	1	13	1	12	1	1	1	1	1	1	1	1	1	1	2	12	1	4	1	2	1	1	1	1	1	4	0	1	1	1	3	1	1	1	1	6	1	1	7	1	95	LG+C50+F+G
OG0000583	1	5	5	0	3	4	3	4	0	4	0	4	0	2	1	1	6	0	1	3	0	0	0	2	2	3	0	3	3	3	4	3	2	4	0	1	4	3	3	5	3	95	JTT+F+I+G4
OG0000584	2	0	18	0	4	1	5	0	0	4	0	3	4	0	1	6	0	1	1	1	0	0	0	0	1	1	0	0	8	0	3	11	0	2	1	1	2	6	5	2	1	95	LG+C20+F+G
OG0000585	4	0	1	0	2	1	2	4	0	7	0	3	1	1	0	3	1	0	8	3	0	0	1	2	0	5	1	0	4	1	7	2	7	6	5	6	1	2	2	1	1	95	LG+C50+F+G
OG0000586	2	0	2	1	1	3	4	3	2	3	1	2	3	1	3	1	2	4	5	4	2	1	2	2	1	2	6	1	2	3	2	3	3	2	1	1	5	3	2	2	2	95	LG+C30+F+G
OG0000587	2	2	3	3	3	2	2	1	2	2	3	2	2	3	1	1	3	1	9	3	2	3	3	2	2	1	2	2	4	2	2	3	2	2	1	2	1	2	3	2	2	95	C60
OG0000588	2	7	2	3	1	1	1	2	3	1	2	1	1	1	3	1	1	2	8	2	1	4	2	1	3	4	1	2	6	2	1	1	5	3	4	4	1	1	1	2	1	95	JTT+F+I+G4
OG0000589	2	2	2	1	2	2	2	3	1	3	3	2	1	3	3	3	2	1	6	2	0	0	0	1	3	0	1	7	5	1	1	1	4	2	5	4	1	2	2	6	3	95	LG+C20+F+G
OG0000590	5	4	1	0	2	1	4	1	0	2	0	4	10	2	2	2	1	2	5	2	0	4	2	5	1	1	3	2	1	1	3	1	1	5	4	3	1	1	1	1	4	95	LG+C20+F+G
OG0000591	1	7	10	4	3	1	1	1	3	1	2	3	1	3	2	1	2	2	8	0	1	7	4	1	3	4	1	2	1	2	1	1	1	1	1	1	1	2	1	2	1	95	JTT+F+I+G4
OG0000592	1	2	2	4	2	1	1	3	1	1	1	1	2	3	4	3	2	5	2	11	2	4	3	1	5	3	4	3	2	3	1	2	1	1	2	1	1	1	1	1	1	95	LG+C30+F+G
OG0000593	1	0	1	4	1	4	2	1	1	2	4	1	6	1	1	6	1	2	6	1	1	0	3	3	2	3	3	3	1	1	3	1	4	6	5	2	1	1	1	1	4	95	LG+C40+F+G
OG0000594	2	2	2	2	2	2	3	2	4	4	2	2	2	3	2	2	2	3	2	2	2	2	2	1	2	2	2	1	2	3	3	2	2	4	2	2	3	3	3	3	2	95	C60
OG0000595	2	2	1	4	1	1	2	4	4	2	2	6	1	3	1	4	1	1	3	3	1	3	4	3	1	4	2	0	1	2	1	1	4	4	2	2	1	1	3	2	5	95	JTT+F+G4
OG0000596	3	7	1	3	1	2	1	5	0	1	2	2	3	3	3	4	1	2	7	2	2	0	2	4	2	4	1	1	2	1	1	1	3	1	2	3	1	1	1	2	7	95	JTT+F+I+G4
OG0000597	2	4	3	2	4	2	2	2	2	2	1	2	2	4	2	1	2	2	4	1	2	2	4	2	2	2	2	0	2	2	2	4	2	2	3	2	5	2	2	3	2	95	LG+C40+F+G
OG0000598	2	1	4	2	0	3	3	2	2	3	5	2	2	4	0	3	1	2	4	2	2	3	6	2	2	1	5	0	2	4	2	2	2	2	2	0	0	2	2	4	3	95	LG+C40+F+G
OG0000599	2	4	3	2	3	2	2	2	4	2	4	2	2	2	2	1	2	2	3	2	2	2	3	2	2	3	3	2	3	2	2	4	1	2	1	1	2	2	2	4	2	95	JTT+F+I+G4
OG0000600	2	9	1	2	1	3	2	3	6	1	1	1	1	4	1	1	2	3	5	1	3	5	5	1	1	1	1	1	1	1	3	2	5	3	1	1	1	2	3	1	3	95	JTT+F+I+G4
OG0000601	4	0	1	1	1	6	5	3	7	5	3	5	0	2	1	0	1	1	4	4	2	0	0	3	4	0	0	0	0	2	5	1	4	4	1	0	2	5	4	0	4	95	WAG+F+R5
OG0000602	1	2	3	3	1	2	1	3	5	2	2	3	1	2	1	4	2	3	7	1	2	2	2	1	5	3	1	3	1	1	3	1	3	2	2	4	1	3	2	2	2	95	JTT+F+I+G4
OG0000603	0	1	3	3	3	5	5	1	0	2	1	0	16	1	3	5	1	2	3	0	1	0	0	0	0	5	1	0	6	1	0	1	0	1	5	5	0	2	7	4	1	95	LG4X
OG0000604	2	2	2	2	2	2	3	4	2	3	3	4	1	2	2	2	2	2	4	2	2	2	1	2	2	4	1	1	3	2	3	2	3	3	2	4	2	2	2	1	2	94	LG+C20+F+G
OG0000605	3	3	2	1	4	2	3	2	3	3	1	3	1	3	2	3	2	2	5	2	3	1	1	3	3	1	2	0	0	2	2	4	3	3	2	1	3	1	3	4	2	94	LG+C30+F+G
OG0000606	2	5	1	1	1	1	2	2	3	1	4	1	1	1	3	2	2	5	3	3	2	5	1	1	0	6	1	1	4	2	1	1	2	2	6	6	1	1	1	1	5	94	LG+C10+F+G
OG0000607	2	1	1	1	1	1	1	1	2	1	2	2	1	1	1	1	1	2	1	1	44	2	2	1	1	1	2	0	2	1	1	2	1	2	1	1	1	1	1	1	1	94	C50
OG0000608	2	2	2	2	1	2	2	2	2	2	2	2	2	3	2	3	2	3	6	2	7	2	2	2	2	2	2	2	2	2	2	3	2	2	2	1	3	2	2	2	2	94	JTT+F+R4
OG0000609	1	3	1	4	1	1	1	2	1	1	5	2	1	7	1	2	1	5	6	2	3	5	5	1	2	2	2	3	1	2	1	3	2	1	3	5	1	1	1	1	1	94	JTT+F+I+G4
OG0000610	2	10	1	3	1	1	1	3	3	1	5	1	1	6	3	1	3	2	9	2	3	5	4	1	1	1	1	0	1	1	1	1	5	1	3	1	1	1	1	1	1	94	JTT+F+G4
OG0000611	3	0	1	1	1	4	3	2	1	2	0	4	4	2	4	4	1	1	5	3	0	3	1	1	2	5	2	3	4	1	3	1	2	5	3	4	2	1	1	1	3	94	LG+C40+F+G
OG0000612	2	6	4	2	1	1	1	3	5	1	1	2	1	3	4	3	2	3	9	1	2	2	2	1	1	1	1	4	5	2	1	1	4	1	1	4	1	1	1	1	2	94	JTT+F+I+G4
OG0000613	3	5	1	4	0	1	4	2	2	3	3	1	2	2	2	3	1	3	8	2	3	1	3	1	1	4	2	0	4	1	1	1	4	7	2	2	1	1	1	1	1	94	LG+C30+F+G
OG0000614	0	9	4	0	1	2	1	1	1	1	1	1	1	5	6	0	4	4	0	3	3	5	5	1	1	5	3	0	6	1	1	2	1	1	2	4	4	1	1	1	1	94	LG+C40+F+G
OG0000615	0	0	11	0	1	0	0	0	1	2	2	1	22	0	1	10	3	1	9	3	2	1	0	0	4	0	1	0	4	0	1	2	0	0	3	2	2	3	0	1	0	93	WAG+F+R4
OG0000616	0	0	1	0	0	36	8	8	3	1	0	0	1	0	0	0	0	0	1	0	0	0	0	0	0	0	0	0	0	0	3	0	0	4	1	1	0	12	8	0	6	94	JTT+F+R4
OG0000617	3	6	2	1	2	2	2	4	1	1	1	1	1	1	6	3	2	1	3	2	2	2	1	1	3	2	3	3	3	2	3	2	2	2	3	2	2	4	2	3	1	93	LG+C20+F+G
OG0000618	4	3	1	0	1	1	4	3	0	4	0	8	0	1	2	0	4	0	0	2	0	3	1	5	0	4	1	3	4	2	3	1	2	5	4	2	1	4	4	1	5	93	JTT+F+I+G4
OG0000619	3	1	7	3	2	2	4	1	3	2	3	2	4	0	3	2	5	3	2	2	1	1	1	3	2	1	3	0	1	2	3	4	3	3	1	1	1	2	1	3	2	93	LG+C30+F+G
OG0000620	2	2	2	2	2	2	2	2	2	2	2	2	2	3	2	3	2	2	2	2	2	1	3	2	3	1	2	3	2	3	2	4	2	2	3	2	2	2	2	6	2	93	LG+C20+F+G
OG0000621	2	2	1	2	2	1	2	4	4	4	2	2	1	1	4	3	1	2	7	3	1	1	2	4	2	3	2	0	1	1	2	2	7	1	3	1	1	3	1	1	4	93	JTT+F+I+G4
OG0000622	3	1	3	0	0	3	22	2	0	2	0	4	1	2	0	0	1	2	0	0	0	0	1	2	0	6	0	0	4	0	1	8	1	4	1	1	5	2	7	0	4	93	LG+C20+F+G
OG0000623	2	3	3	2	3	2	2	2	2	2	4	2	2	1	2	3	2	2	5	2	3	3	3	2	2	2	1	3	2	1	2	2	2	2	2	2	2	2	2	3	2	93	LG+C20+F+G
OG0000624	1	3	2	3	1	1	2	4	3	1	3	4	1	3	1	1	5	4	2	2	2	4	4	1	2	3	3	4	3	1	1	4	2	2	1	3	1	1	2	1	1	93	JTT+F+I+G4
OG0000625	1	6	1	2	2	1	1	2	5	2	1	1	1	3	4	3	1	4	7	2	2	3	7	1	1	2	2	1	1	1	1	1	4	2	2	4	1	1	1	4	1	93	LG+C20+F+G
OG0000626	2	3	2	3	2	2	4	2	1	2	3	2	1	3	2	2	2	2	7	2	1	3	2	2	2	2	1	1	2	2	2	2	2	3	2	3	3	2	2	3	2	93	LG+C40+F+G
OG0000627	2	4	2	2	2	2	2	2	4	2	3	2	2	3	3	2	2	2	3	2	2	3	2	2	2	2	2	2	2	2	2	2	2	2	1	3	3	2	2	3	2	93	LG+C20+F+G
OG0000628	2	2	3	2	2	3	3	2	3	3	3	2	2	1	2	2	1	3	6	1	2	2	2	2	2	2	1	0	2	1	2	1	2	3	1	3	2	3	3	6	3	93	LG+C30+F+G
OG0000629	3	5	1	2	2	1	2	2	3	2	1	1	2	4	4	5	1	4	5	1	1	2	1	1	1	5	1	2	5	1	1	1	4	1	4	3	1	2	3	1	1	93	JTT+F+I+G4
OG0000630	1	6	2	1	3	1	1	1	3	1	2	1	1	4	3	1	1	3	6	1	1	5	3	1	4	4	3	1	7	1	1	2	1	1	5	4	1	1	1	2	1	93	LG+C20+F+G
OG0000631	1	3	2	5	2	1	2	1	3	1	2	1	1	2	5	1	2	3	9	2	1	3	4	1	2	3	1	2	4	1	1	1	2	2	5	6	1	1	1	1	1	93	LG+C20+F+G
OG0000632	2	2	2	2	2	2	2	1	2	2	3	2	2	2	2	2	3	2	4	4	4	3	2	2	2	1	1	2	2	3	2	3	2	3	2	2	4	2	2	2	2	93	LG+C20+F+G
OG0000633	1	5	1	1	2	1	1	2	1	1	2	2	1	3	5	7	1	1	11	2	2	4	4	1	2	2	1	1	5	1	1	1	3	1	5	2	1	1	1	2	1	93	LG+C40+F+G
OG0000634	3	2	2	2	2	2	2	3	4	1	1	3	2	2	2	2	2	2	3	3	2	3	1	2	2	2	1	1	2	2	4	3	3	4	1	1	2	2	4	2	4	93	JTT+F+I+G4
OG0000635	1	6	2	1	4	0	1	1	1	3	1	1	2	1	9	3	4	1	0	1	3	3	2	1	5	4	12	0	2	1	1	1	1	1	2	2	5	1	1	1	1	93	LG+C40+F+G
OG0000636	1	2	2	3	4	2	2	2	3	2	2	1	1	4	5	1	2	3	6	1	2	1	1	3	1	2	1	0	1	4	3	4	2	2	1	3	3	2	2	5	1	93	LG+C30+F+G
OG0000637	1	7	2	2	1	1	1	2	1	1	2	1	1	3	4	1	8	3	4	1	0	4	4	1	2	5	1	4	4	1	1	1	2	1	3	6	1	1	1	2	1	93	LG+C40+F+G
OG0000638	1	4	4	0	3	3	3	3	1	3	0	4	0	0	1	3	3	1	4	2	1	1	0	2	2	3	1	5	4	3	1	6	4	3	1	1	2	3	2	2	3	93	LG+C20+F+G
OG0000639	1	1	8	2	3	2	1	0	0	2	0	1	4	1	2	2	8	0	1	2	1	0	0	0	0	1	2	3	5	3	1	4	2	2	4	2	13	3	2	2	2	93	LG+C20+F+G
OG0000640	0	5	1	7	2	1	1	1	2	1	4	1	1	5	2	1	1	2	8	2	1	8	6	0	3	1	2	3	2	1	1	0	1	1	2	6	1	1	1	2	1	92	LG+C40+F+G
OG0000641	0	0	1	0	3	2	3	0	0	1	1	1	0	0	2	3	1	0	5	0	6	5	0	1	0	4	1	1	2	1	1	9	2	0	2	5	21	3	1	4	1	93	LG+C30+F+G
OG0000642	0	0	0	0	0	2	1	0	6	10	0	0	0	0	0	1	0	1	0	0	0	0	0	0	0	0	0	0	0	0	51	0	0	6	0	0	0	4	6	0	5	93	JTT+F+R4
OG0000643	4	2	2	5	1	1	2	2	0	2	1	3	1	4	2	4	6	1	6	0	1	3	4	2	1	1	1	2	3	1	1	1	6	2	2	4	0	3	1	2	2	92	JTT+F+I+G4
OG0000644	2	1	1	2	3	2	2	2	2	2	4	2	3	2	2	1	3	2	5	4	2	3	3	2	3	2	2	3	1	2	2	2	2	2	2	2	2	2	2	2	2	92	LG+C40+F+G
OG0000645	2	5	2	2	3	2	2	2	3	2	3	2	2	2	1	2	3	2	3	1	2	1	3	2	2	2	2	2	2	2	2	2	2	2	2	3	4	2	2	3	2	92	LG+C50+F+G
OG0000646	2	2	2	2	2	2	2	2	2	2	2	2	2	2	1	2	2	2	5	2	2	3	3	2	2	2	3	3	3	2	2	3	2	2	3	2	1	2	2	4	2	92	LG+C30+F+G
OG0000647	2	3	2	2	3	2	2	2	2	2	3	2	2	3	1	2	2	2	4	2	3	3	5	2	1	2	4	1	2	2	2	2	2	2	3	2	2	2	2	1	2	92	LG+C20+F+G
OG0000648	1	5	2	1	1	1	1	1	2	1	5	1	1	4	2	1	1	5	9	1	6	4	7	1	4	3	2	5	1	0	1	1	1	1	1	2	1	1	1	2	1	92	LG+C40+F+G
OG0000649	1	0	21	1	0	4	1	3	0	4	0	1	0	0	0	0	10	0	1	0	0	0	0	0	0	1	0	0	1	12	1	6	4	2	3	1	0	1	5	4	4	92	JTT+F+G4
OG0000650	5	1	3	2	1	6	7	4	4	4	0	3	2	0	3	0	0	0	1	0	0	1	0	3	2	1	0	0	0	8	4	2	5	5	1	1	0	4	5	1	3	92	WAG+F+I+G4
OG0000651	6	4	1	1	2	1	1	5	1	1	3	4	3	4	1	4	1	1	5	3	1	4	4	1	3	1	3	1	1	2	4	1	1	1	2	2	1	1	1	1	4	92	LG+C50+F+G
OG0000652	1	4	1	3	5	2	2	1	2	3	2	2	1	2	2	5	1	4	8	4	1	0	4	3	2	2	2	0	5	1	1	1	5	1	1	2	1	1	1	2	1	92	JTT+F+R4
OG0000653	1	3	2	3	2	2	2	3	4	2	2	2	2	2	2	2	2	2	5	2	3	2	1	1	2	3	2	3	2	2	2	2	2	2	2	3	2	2	2	3	2	92	JTT+F+I+G4
OG0000654	3	3	2	1	2	2	2	2	4	2	2	3	3	4	1	2	2	2	5	1	0	3	2	2	3	2	0	3	1	2	3	2	2	2	3	2	3	2	2	3	2	92	JTT+F+G4
OG0000655	2	2	2	2	3	1	2	1	2	2	4	2	2	2	1	2	3	2	4	2	2	4	3	2	2	2	0	2	3	2	2	2	2	2	4	2	3	2	2	4	2	92	LG+C20+F+G
OG0000656	6	2	0	2	2	1	5	2	1	3	0	2	3	2	5	1	0	1	4	0	0	4	3	4	1	4	1	1	4	2	2	0	5	2	3	2	1	1	2	1	7	92	WAG+F+I+G4
OG0000657	4	5	1	0	2	1	3	7	0	1	0	3	0	4	1	3	2	1	8	3	0	2	0	1	2	0	2	2	2	1	2	2	4	3	2	3	3	3	1	2	6	92	LG+C20+F+G
OG0000658	1	1	1	3	3	0	2	3	3	2	1	1	1	1	2	3	2	2	1	3	2	6	8	1	2	1	1	2	4	3	2	2	2	5	3	2	2	2	3	2	1	92	LG+C20+F+G
OG0000659	2	3	1	3	3	2	2	3	2	4	2	2	2	3	2	1	2	2	4	1	2	4	3	1	2	2	2	3	2	2	2	2	2	2	4	2	2	2	2	1	2	92	LG+C20+F+G
OG0000660	2	2	2	2	8	2	2	2	2	2	1	2	1	3	2	4	5	1	8	1	1	1	2	2	3	1	1	0	0	3	2	4	2	2	1	1	2	2	2	4	2	92	LG+C40+F+G
OG0000661	1	1	5	3	3	3	3	1	1	0	0	3	0	1	1	5	1	2	2	1	1	1	0	1	0	3	4	1	4	16	1	6	1	3	1	1	0	3	3	4	1	92	LG+C10+F+G
OG0000662	2	2	1	1	4	2	2	3	3	3	2	2	3	2	2	2	2	0	1	3	2	3	2	2	2	1	1	7	4	3	2	3	2	2	1	0	2	2	2	4	3	92	JTT+F+G4
OG0000663	1	7	1	1	4	1	1	2	1	1	1	1	1	2	4	2	1	3	4	1	2	4	5	1	1	4	1	6	4	1	1	6	4	1	3	3	1	1	1	1	1	92	LG+C30+F+G
OG0000664	0	0	2	0	2	6	0	0	0	3	0	5	0	0	4	3	0	0	1	0	0	1	2	0	0	0	0	23	1	0	0	2	1	0	0	1	31	2	1	0	1	92	LG+C30+F+G
OG0000665	3	3	2	2	4	2	2	2	0	4	0	3	0	1	4	3	3	1	2	2	2	1	0	0	1	2	1	4	3	2	4	5	3	4	1	4	3	2	2	2	2	91	LG+C10+F+G
OG0000666	1	3	1	6	2	2	4	1	0	3	0	3	1	0	0	4	3	1	5	2	2	0	1	3	0	3	1	3	2	4	3	2	2	2	3	1	5	3	3	3	3	91	LG+C10+F+G
OG0000667	2	3	2	2	2	2	2	3	2	2	1	3	2	2	1	1	2	3	5	2	3	3	2	2	2	2	2	3	4	1	2	2	2	2	3	2	2	2	2	2	2	91	LG+C20+F+G
OG0000668	1	6	2	3	1	1	1	2	8	1	1	3	1	1	4	2	1	2	5	1	2	1	4	1	2	2	1	2	4	5	1	4	1	1	2	3	1	1	2	3	1	91	JTT+F+I+G4
OG0000669	1	2	2	1	4	2	2	3	1	3	1	2	3	2	2	3	3	1	3	3	1	1	3	3	2	2	1	5	3	4	2	2	2	2	1	1	4	2	2	2	2	91	JTT+F+G4
OG0000670	1	10	1	3	0	1	1	1	4	1	4	1	1	3	3	1	1	3	5	1	1	4	5	1	2	4	3	2	5	1	1	2	3	1	3	2	1	1	1	1	1	91	LG+C40+F+G
OG0000671	2	1	1	2	4	1	1	2	2	4	0	1	2	1	1	1	3	1	1	3	1	2	1	2	3	1	2	2	3	4	3	5	2	2	5	1	4	4	4	4	2	91	LG+C20+F+G
OG0000672	1	1	3	1	1	1	1	1	2	1	2	7	1	1	0	4	2	2	8	1	0	6	2	1	1	2	2	3	4	1	4	2	4	2	5	0	2	1	2	1	5	91	LG+C40+F+G
OG0000673	0	5	0	0	1	0	0	0	0	0	0	0	57	0	0	0	0	0	1	0	2	4	2	0	1	4	0	0	2	0	0	0	0	0	6	6	0	0	0	0	0	91	JTT+F+R5
OG0000674	2	2	2	1	1	3	4	2	2	3	2	2	2	3	1	1	1	1	4	4	2	3	1	2	2	2	1	1	1	1	4	5	2	3	2	2	5	2	2	1	3	90	LG+C50+F+G
OG0000675	5	6	1	5	1	1	4	1	0	2	0	4	2	3	2	1	1	2	6	2	2	5	1	3	3	4	2	0	4	1	2	1	1	2	1	2	1	1	1	1	3	90	JTT+F+I+G4
OG0000676	1	0	2	3	2	2	2	1	0	3	0	1	1	2	0	5	3	0	2	3	0	1	0	3	2	2	3	0	3	5	3	4	3	3	1	1	3	5	3	10	2	90	LG+C10+F+G
OG0000677	2	3	2	2	2	2	2	2	5	2	3	3	2	2	2	2	2	1	3	1	1	4	2	2	2	1	3	1	2	4	2	2	3	2	2	2	2	2	2	2	2	90	LG+C20+F+G
OG0000678	2	3	2	3	2	2	2	2	2	2	2	2	2	2	2	2	2	1	4	3	1	1	1	2	2	3	3	4	1	2	2	0	5	2	2	3	2	2	3	2	3	90	LG+C30+F+G
OG0000679	2	1	2	2	2	2	3	1	3	2	1	3	1	1	1	3	2	1	4	4	1	4	1	5	2	2	3	0	4	2	3	2	3	3	1	2	2	2	2	2	3	90	JTT+F+I+G4
OG0000680	3	2	2	2	1	2	2	3	3	2	2	2	2	3	2	3	2	2	3	2	1	2	2	3	2	2	2	2	2	2	2	3	2	2	3	3	1	2	2	3	2	90	LG+C20+F+G
OG0000681	3	4	4	1	1	3	3	4	3	3	1	3	1	1	1	1	5	1	2	2	1	1	1	3	1	1	1	1	1	1	3	3	4	3	1	1	1	4	3	5	3	90	LG+C40+F+G
OG0000682	2	2	2	2	3	2	2	2	2	1	5	2	1	3	0	4	4	3	5	0	2	1	2	2	1	2	2	3	2	2	2	3	2	2	2	1	2	1	2	5	2	90	LG+C20+F+G
OG0000683	5	0	2	0	1	6	7	6	8	7	0	1	0	2	1	0	3	0	1	0	0	0	0	4	2	0	0	0	0	1	6	1	3	6	0	0	1	5	5	2	4	90	LG+C30+F+G
OG0000684	3	1	3	1	2	2	4	3	2	3	2	1	1	3	3	3	2	3	3	4	2	1	1	1	3	1	2	1	3	2	2	2	1	2	2	2	2	2	2	3	4	90	JTT+F+G4
OG0000685	3	7	2	1	2	2	1	1	3	1	4	1	2	6	5	1	2	3	6	0	3	2	5	1	4	1	2	3	1	1	1	1	4	1	1	1	1	1	1	1	1	90	LG+C50+F+G
OG0000686	1	5	1	3	1	2	1	1	3	1	2	1	1	1	3	1	1	1	2	2	3	4	4	1	1	4	1	1	4	2	1	2	2	1	1	2	18	1	1	1	1	90	LG+C40+F+G
OG0000687	2	4	1	1	2	2	3	2	0	5	0	2	1	1	2	3	2	1	6	2	0	2	2	4	3	2	2	2	1	2	4	2	4	4	1	3	2	2	2	2	2	90	LG+C20+F+G
OG0000688	1	8	1	1	1	1	1	1	4	1	1	1	1	4	4	1	1	3	7	2	1	4	5	1	3	2	1	6	2	2	1	1	2	1	4	2	1	1	1	3	1	90	LG+C50+F+G
OG0000689	2	4	3	2	3	1	2	2	2	2	3	1	2	2	2	2	2	2	4	1	2	3	2	2	2	2	2	1	3	2	2	4	2	2	2	2	5	2	1	2	1	90	LG+C40+F+G
OG0000690	3	6	2	4	2	2	2	2	2	2	1	2	1	2	1	2	2	3	2	2	1	2	2	2	3	3	1	3	1	2	2	2	2	1	3	3	1	1	1	7	2	90	C60
OG0000691	2	1	3	2	3	2	2	3	3	1	2	2	1	1	2	2	3	0	7	1	1	2	1	2	2	2	2	2	2	2	2	5	2	2	2	2	4	2	2	3	3	90	LG+C10+F+G
OG0000692	2	5	1	1	1	1	2	3	6	1	1	3	1	2	4	1	2	1	7	2	2	5	2	2	3	2	2	5	4	1	1	2	2	2	3	0	1	0	1	2	1	90	LG+C40+F+G
OG0000693	1	4	2	1	2	1	1	6	5	1	2	1	1	1	1	2	2	2	6	2	2	8	5	1	1	2	2	0	2	2	1	1	5	1	2	7	0	1	1	1	1	90	JTT+F+I+G4
OG0000694	2	5	2	2	4	2	2	2	2	2	2	3	1	2	2	2	2	2	4	2	1	3	2	2	2	2	3	1	3	2	1	2	2	2	2	3	2	2	2	2	2	90	LG+C20+F+G
OG0000695	1	1	2	4	1	2	2	4	3	2	2	3	4	5	2	3	1	3	2	2	3	4	5	2	2	1	1	3	1	1	2	1	4	2	1	1	1	2	1	2	1	90	JTT+F+I+G4
OG0000696	1	5	1	1	1	1	1	1	6	2	1	1	1	2	1	1	1	4	7	4	3	4	3	1	3	4	3	3	3	1	2	2	2	1	2	4	1	1	1	1	2	90	LG+C40+F+G
OG0000697	1	8	1	1	3	1	1	1	2	1	4	1	1	4	4	1	2	1	8	1	0	4	6	1	2	4	3	3	1	1	1	6	1	1	1	2	1	1	1	2	1	90	LG+C50+F+G
OG0000698	0	8	0	14	0	0	0	0	0	0	4	0	34	0	0	0	0	1	0	14	2	3	2	0	0	1	0	0	2	0	0	0	0	0	2	3	0	0	0	0	0	90	WAG+F+R4
OG0000699	2	1	1	0	1	6	7	1	4	7	1	2	1	1	3	1	2	1	2	2	2	1	2	3	1	1	1	0	1	1	3	1	2	5	1	1	1	6	4	1	5	89	LG+C30+F+G
OG0000700	2	5	1	7	1	1	1	1	2	1	0	1	6	1	2	1	7	2	5	1	0	1	2	1	1	4	1	3	6	2	1	1	1	1	7	2	1	2	1	2	1	89	LG+C20+F+G
OG0000701	2	2	3	2	0	5	4	4	2	2	3	2	1	3	2	5	2	0	4	2	1	1	1	3	2	1	2	0	1	5	2	3	1	2	1	2	2	2	2	2	3	89	C60
OG0000702	2	2	3	10	2	2	2	1	0	2	4	2	3	3	1	0	4	3	4	0	1	0	1	1	2	2	0	0	2	3	2	2	2	2	3	2	3	2	2	5	2	89	JTT+F+I+G4
OG0000703	5	6	2	5	1	1	1	3	1	2	0	1	4	1	4	1	1	1	4	1	1	4	1	6	1	1	1	2	1	1	1	1	2	3	4	5	1	1	1	2	4	89	LG+C20+F+G
OG0000704	2	8	1	1	1	1	1	1	6	2	2	1	1	6	2	1	2	1	5	1	1	3	5	1	1	6	1	1	7	1	1	2	3	1	2	1	1	1	1	2	1	89	LG+C40+F+G
OG0000705	1	6	1	3	1	2	2	1	1	1	3	2	2	2	2	1	1	3	7	2	2	2	6	1	3	4	1	1	5	1	1	1	2	1	3	4	1	1	1	2	2	89	JTT+F+I+G4
OG0000706	1	2	2	2	1	1	2	1	1	2	2	3	2	3	2	1	7	2	2	4	2	2	4	1	3	2	2	1	3	1	2	1	5	3	2	3	1	2	3	2	1	89	LG+C20+F+G
OG0000707	1	9	1	3	2	1	1	1	3	1	3	3	1	4	2	1	1	2	7	1	1	5	7	1	3	1	1	5	1	1	2	1	3	1	1	1	1	1	2	1	1	89	LG+C60+F+G
OG0000708	1	6	1	1	1	1	1	1	4	1	1	1	1	4	4	7	3	1	8	1	1	5	5	1	3	3	2	1	1	1	1	1	2	1	3	2	1	1	1	1	3	89	LG+C40+F+G
OG0000709	1	10	1	3	2	1	1	1	2	1	2	2	1	4	5	1	1	1	8	2	6	4	2	1	3	1	1	1	2	2	2	1	1	1	2	3	1	1	1	2	1	89	LG+F+R5
OG0000710	2	2	2	2	2	2	2	2	2	2	3	2	1	2	2	2	4	1	4	2	4	3	2	1	2	1	2	3	2	2	2	3	3	2	2	3	1	2	2	2	2	89	JTT+F+G4
OG0000711	1	0	3	4	1	1	1	7	6	2	2	2	2	3	2	1	1	2	3	2	0	3	0	1	2	3	2	3	4	1	1	1	6	1	3	2	2	2	1	1	4	89	LG+C60+F+G
OG0000712	1	2	1	4	0	1	1	1	0	5	2	1	1	2	5	1	1	2	8	2	2	2	3	3	1	3	2	0	6	1	1	1	3	1	5	6	1	1	1	3	2	89	LG+C20+F+G
OG0000713	2	5	1	1	5	1	1	2	1	1	3	1	1	5	2	1	1	3	6	1	4	4	7	2	2	2	3	2	1	1	1	3	2	1	1	2	1	1	1	2	1	88	JTT+F+I+G4
OG0000714	3	3	1	1	2	1	1	1	4	1	1	3	1	2	4	4	2	3	8	2	1	2	2	1	1	1	2	1	1	4	1	1	5	2	3	5	2	1	1	2	1	88	LG+C30+F+G
OG0000715	1	2	1	4	1	1	1	3	3	1	2	2	1	2	1	3	3	1	6	2	1	3	4	1	1	2	1	3	5	1	1	2	2	1	3	7	1	1	1	2	4	88	LG+C40+F+G
OG0000716	3	3	1	7	1	1	2	1	2	1	1	2	1	3	7	1	1	3	8	4	1	2	0	1	1	4	2	0	4	1	1	1	4	1	4	3	1	1	1	1	1	88	LG+C50+F+G
OG0000717	2	3	3	2	3	2	2	2	3	2	1	2	2	1	1	2	2	1	7	2	2	2	0	2	3	2	1	1	3	3	1	2	2	3	2	2	3	2	2	3	2	88	LG+C30+F+G
OG0000718	4	2	0	0	1	0	2	2	8	0	2	2	11	1	23	1	0	1	6	0	0	0	0	1	3	0	3	0	2	1	0	0	2	1	0	3	0	0	6	0	0	88	LG+C30+F+G
OG0000719	2	1	2	2	4	1	4	3	2	3	1	1	1	1	1	3	4	1	4	5	2	1	2	1	2	1	2	1	3	2	3	4	2	4	1	1	1	2	3	2	2	88	LG+C30+F+G
OG0000720	1	2	2	2	1	1	1	1	3	1	1	3	1	3	3	4	2	0	2	2	3	4	7	1	2	1	3	5	1	1	1	7	1	1	2	1	2	1	2	4	2	88	LG+C20+F+G
OG0000721	4	6	1	2	1	1	2	2	1	1	0	1	5	0	4	2	3	3	5	2	0	6	4	5	1	1	2	0	1	1	1	1	2	1	3	4	1	1	1	1	5	88	LG+C20+F+G
OG0000722	1	7	1	1	1	1	1	3	4	1	1	2	1	2	4	5	1	4	10	1	2	3	4	1	3	2	2	2	1	1	1	1	1	1	3	0	2	1	1	3	1	88	JTT+F+I+G4
OG0000723	2	3	2	2	2	2	2	2	2	2	3	2	2	2	3	2	2	2	3	1	2	3	2	2	2	3	2	3	1	2	2	2	2	2	2	3	2	2	2	2	2	88	LG+C20+F+G
OG0000724	2	6	6	1	1	1	3	3	2	1	1	1	1	2	3	1	1	2	5	2	2	2	3	6	3	2	1	2	1	2	1	2	3	1	2	2	2	1	2	2	1	88	JTT+F+I+G4
OG0000725	3	7	1	2	1	1	1	2	0	2	0	6	2	2	3	3	1	0	3	1	0	0	0	3	2	6	0	2	4	1	5	1	6	1	2	2	1	3	1	2	5	88	JTT+F+G4
OG0000726	2	1	4	3	3	2	2	2	2	2	3	1	2	4	2	1	3	4	6	1	1	0	1	2	2	1	2	0	2	3	3	3	3	2	1	1	2	2	2	3	2	88	JTT+F+I+G4
OG0000727	1	6	4	3	2	1	2	2	2	2	2	2	2	2	1	1	2	2	10	0	2	1	1	2	2	2	2	0	1	3	2	0	2	2	3	2	1	2	2	4	3	88	LG+C30+F+G
OG0000728	2	2	2	3	2	2	2	2	3	2	2	2	2	3	2	3	2	2	5	2	3	3	2	1	2	1	2	2	2	1	2	4	2	2	2	2	1	1	2	2	2	88	LG+C10+F+G
OG0000729	0	0	2	0	3	3	1	1	0	2	0	0	1	0	0	0	1	0	1	0	0	7	6	0	0	0	0	0	0	50	3	0	2	1	1	0	0	1	1	1	0	88	WAG+F+G4
OG0000730	3	3	1	1	2	1	1	2	1	1	2	4	1	2	3	1	1	2	9	1	3	5	4	1	3	4	1	1	5	1	1	1	3	1	5	1	1	1	1	1	1	87	LG+C40+F+G
OG0000731	3	3	1	6	1	1	1	1	2	1	4	1	1	3	3	2	1	1	8	2	1	3	4	2	2	4	1	1	1	1	2	1	3	2	3	3	1	1	1	1	2	86	JTT+F+I+G4
OG0000732	3	3	2	2	3	2	2	2	1	2	3	2	2	4	5	2	5	2	2	2	1	0	0	3	2	3	1	2	3	2	2	1	2	3	1	0	2	1	2	3	2	87	LG+C30+F+G
OG0000733	2	0	5	2	3	4	3	4	3	2	1	1	0	2	0	1	1	2	10	3	0	0	0	2	1	0	3	0	1	1	3	2	2	4	0	0	2	3	4	7	3	87	C60
OG0000734	2	2	1	2	2	2	2	1	2	2	2	2	2	2	2	3	3	1	5	2	2	2	2	2	2	2	2	1	2	3	2	3	3	2	2	3	2	2	1	3	2	87	LG+C40+F+G
OG0000735	2	5	2	3	1	1	2	2	3	2	2	1	2	4	1	1	2	2	3	1	1	2	3	2	2	4	2	2	2	1	2	2	2	2	3	3	3	1	1	3	2	87	LG+C40+F+G
OG0000736	2	4	4	2	2	2	3	2	2	2	2	2	3	2	2	1	2	2	3	3	3	2	0	2	2	1	2	1	2	3	2	1	2	2	2	2	3	2	2	2	2	87	JTT+F+R4
OG0000737	1	3	3	2	5	2	2	1	1	2	1	2	2	1	3	3	3	1	2	2	1	0	1	2	3	2	1	4	1	4	3	3	2	2	1	2	2	3	3	3	2	87	JTT+F+G4
OG0000738	2	2	1	1	2	1	4	1	0	2	0	3	1	0	4	1	1	1	6	2	0	2	1	3	5	2	1	1	1	2	1	9	3	2	1	1	1	1	1	8	6	87	LG+C20+F+G
OG0000739	3	1	2	1	1	3	4	2	1	3	0	2	1	2	1	2	1	3	3	6	1	1	2	3	2	1	2	3	3	2	1	2	2	5	1	1	2	2	3	3	3	87	LG+C10+F+G
OG0000740	1	3	1	6	2	1	1	1	2	1	3	4	1	4	8	1	1	2	6	1	1	2	4	1	1	1	2	0	1	3	1	7	1	1	1	2	1	1	1	4	1	87	LG+C30+F+G
OG0000741	4	2	2	1	1	2	1	4	1	2	1	1	1	3	2	3	1	1	8	1	2	3	2	1	1	4	2	5	3	2	3	2	1	1	4	3	1	1	1	1	2	87	JTT+F+I+G4
OG0000742	2	2	0	1	0	2	2	2	2	2	2	4	2	1	2	1	4	1	6	1	3	2	0	2	2	1	1	1	1	2	2	1	2	2	1	1	15	3	3	1	2	87	LG+C30+F+G
OG0000743	2	4	2	2	2	2	2	2	3	2	1	2	2	2	2	2	2	1	5	2	1	2	2	1	2	3	1	3	3	2	2	2	1	2	2	3	2	2	2	3	2	87	LG+C20+F+G
OG0000744	2	5	3	2	1	1	1	1	0	1	1	1	2	3	2	3	1	2	6	3	2	6	5	2	1	4	1	0	1	1	2	1	4	2	1	3	1	1	1	2	5	87	JTT+F+I+G4
OG0000745	2	4	2	2	2	1	2	2	2	2	1	2	1	2	1	2	2	2	3	3	2	2	2	2	2	2	2	2	3	2	3	2	2	2	3	2	4	2	2	2	2	87	LG+C40+F+G
OG0000746	1	7	1	1	2	1	1	1	3	1	4	1	1	4	3	1	2	4	9	2	3	3	3	1	2	1	1	6	1	4	2	1	1	1	1	1	1	1	1	1	1	87	LG+C20+F+G
OG0000747	1	3	1	1	2	1	1	1	5	1	2	1	1	5	6	3	3	3	6	2	2	2	5	1	3	2	1	2	3	1	1	1	1	2	2	2	3	1	1	1	1	87	LG+C40+F+G
OG0000748	1	6	2	1	5	1	1	1	1	1	4	1	3	3	1	4	1	3	5	1	3	2	5	1	2	2	2	1	1	2	1	4	0	1	2	1	4	2	1	3	1	87	LG+C30+F+G
OG0000749	1	5	2	6	2	1	2	4	0	2	1	2	2	4	2	1	1	2	8	2	1	6	3	2	1	3	1	1	1	1	1	2	1	2	1	2	1	1	2	1	2	86	JTT+F+I+G4
OG0000750	2	2	0	1	10	3	1	0	3	2	1	8	1	3	0	6	0	0	6	1	1	1	0	1	2	2	0	0	3	4	1	4	2	1	1	2	7	0	2	0	2	86	LG+C30+F+G
OG0000751	3	2	0	5	1	2	6	2	0	4	0	2	2	3	0	5	1	1	3	1	0	1	3	3	1	3	1	1	1	1	5	1	2	4	4	0	1	5	2	2	2	86	JTT+F+G4
OG0000752	2	1	3	4	1	1	1	1	1	0	1	0	5	1	0	3	2	5	6	1	2	2	0	2	2	3	7	0	5	1	0	4	1	0	4	4	2	0	0	6	1	85	WAG+F+R4
OG0000753	4	3	1	1	1	1	1	3	1	2	0	1	1	3	3	2	1	1	4	1	1	4	2	2	1	1	1	2	5	1	4	1	6	1	2	4	2	4	1	3	3	86	LG+C20+F+G
OG0000754	2	2	1	2	1	1	1	3	2	4	2	1	1	1	3	2	1	2	4	2	2	3	2	3	1	4	2	2	3	2	1	2	4	2	3	3	1	4	2	1	1	86	JTT+F+G4
OG0000755	4	1	2	5	1	1	2	4	1	3	0	3	5	1	4	4	3	0	2	1	0	1	0	8	1	1	0	2	3	2	1	1	6	2	2	0	1	1	2	1	4	86	LG+C20+F+G
OG0000756	1	6	1	1	1	1	1	3	2	3	2	1	1	4	4	1	1	2	9	1	3	4	4	1	1	1	2	2	1	1	2	1	1	2	1	5	1	1	2	1	3	86	LG+C20+F+G
OG0000757	2	13	1	2	3	1	2	3	1	1	1	2	3	1	1	1	1	3	5	3	2	4	3	2	1	1	1	2	2	0	3	1	1	2	1	2	1	2	1	1	3	86	JTT+F+G4
OG0000758	2	1	2	3	2	3	2	2	2	2	2	2	2	2	2	3	2	2	8	2	2	0	2	2	2	3	3	0	1	2	3	2	2	2	2	0	2	2	2	2	2	86	LG+C20+F+G
OG0000759	1	0	6	1	3	2	2	2	2	2	2	2	0	1	3	6	1	6	8	11	0	0	0	2	2	0	1	0	0	2	2	2	2	2	0	0	3	2	2	1	2	86	LG+C40+F+G
OG0000760	2	4	1	2	2	2	3	2	1	2	1	1	1	3	0	4	2	1	3	3	1	2	0	3	2	2	2	2	5	2	2	1	2	3	4	2	2	2	3	1	3	86	JTT+F+I+G4
OG0000761	1	3	3	4	4	2	2	1	2	1	3	2	1	5	3	5	2	1	3	1	2	3	2	1	3	0	6	3	1	1	1	1	1	1	1	2	1	2	1	3	1	86	LG+C20+F+G
OG0000762	2	1	4	1	3	1	0	2	1	0	2	3	1	2	2	3	4	0	7	3	1	1	1	3	4	2	2	4	2	2	2	3	3	1	0	1	2	0	4	2	4	86	JTT+F+I+G4
OG0000763	1	7	1	6	1	1	1	1	8	1	2	2	1	2	3	1	1	2	9	1	1	5	6	1	2	1	1	1	2	1	1	1	1	2	1	1	1	1	1	2	1	86	JTT+F+I+G4
OG0000764	0	2	4	2	2	3	1	1	1	3	1	1	1	2	3	2	3	2	1	2	2	1	2	2	4	5	1	2	3	2	1	3	2	2	3	1	2	3	2	5	1	86	LG+C40+F+G
OG0000765	4	2	1	5	1	1	4	1	0	4	0	2	3	1	1	5	3	1	3	2	1	0	1	7	1	3	2	2	1	1	4	1	3	5	2	0	1	1	1	2	2	85	LG+C20+F+G
OG0000766	2	2	2	4	3	2	3	1	2	1	2	1	4	4	1	2	2	1	5	1	1	2	0	2	2	1	4	0	2	2	2	2	2	4	1	1	2	2	2	4	2	85	JTT+F+I+G4
OG0000767	2	2	2	2	2	2	2	2	2	2	2	3	2	3	2	2	2	2	4	2	3	2	2	2	2	1	2	2	1	2	2	2	2	2	2	3	2	2	2	1	2	85	LG+C60+F+G
OG0000768	4	2	1	7	1	2	1	5	1	1	1	1	1	2	2	5	1	2	7	1	0	2	2	1	1	2	1	3	5	1	1	1	6	1	2	3	1	1	1	1	1	85	LG+C20+F+G
OG0000769	5	2	0	0	0	9	8	2	0	4	2	1	10	0	0	1	0	6	3	0	0	0	1	0	0	1	0	0	0	0	3	1	0	1	2	8	3	5	5	0	2	85	LG+C30+F+G
OG0000770	3	2	1	0	2	1	2	3	0	3	0	4	1	1	2	6	2	0	1	0	0	2	2	2	2	4	0	4	2	1	7	2	4	1	4	6	1	1	2	2	2	85	C60
OG0000771	2	6	3	1	2	1	2	1	2	2	1	2	1	3	1	2	2	2	7	2	2	1	1	2	1	1	1	2	2	1	2	4	2	2	1	1	3	2	2	5	2	85	LG+C30+F+G
OG0000772	2	4	7	2	3	2	2	5	3	3	0	1	2	3	2	4	1	2	4	1	1	1	1	1	1	1	1	3	1	1	3	2	1	1	2	2	1	1	1	5	1	85	JTT+F+I+G4
OG0000773	1	4	3	0	2	3	5	5	1	5	0	2	0	0	1	0	3	1	4	3	1	1	1	1	2	2	0	3	2	1	2	2	3	5	2	2	2	3	4	1	2	85	JTT+F+G4
OG0000774	1	1	3	3	1	2	2	1	5	2	3	3	4	1	1	3	0	2	0	2	5	2	3	2	1	2	0	0	4	5	2	2	2	1	4	1	3	2	1	2	1	85	LG+C20+F+G
OG0000775	1	3	2	2	2	2	1	1	1	2	2	2	2	2	2	2	3	3	3	2	2	3	3	1	2	2	2	2	3	2	2	2	2	3	3	2	2	2	2	1	2	85	LG+C20+F+G
OG0000776	2	2	1	2	2	2	3	2	5	2	2	2	1	4	3	2	2	1	6	1	1	2	3	2	2	1	1	3	1	2	2	3	2	2	1	1	1	2	2	2	2	85	LG+C20+F+G
OG0000777	2	3	3	1	3	1	2	1	3	2	1	1	1	1	1	3	3	2	7	2	3	1	4	1	1	3	1	2	2	2	2	2	2	3	1	1	5	2	2	1	1	85	LG+C40+F+G
OG0000778	1	4	1	2	4	1	1	1	3	1	2	2	1	4	6	1	1	2	6	1	2	1	3	1	1	2	1	1	5	1	2	1	2	1	4	7	1	1	1	1	1	85	JTT+F+I+G4
OG0000779	3	0	3	0	0	3	4	3	5	4	0	5	0	2	8	1	2	0	3	0	0	0	0	3	5	0	0	0	0	6	2	0	2	3	0	0	6	3	3	3	3	85	LG+C40+F+G
OG0000780	2	1	1	3	1	1	4	2	4	2	1	4	2	5	1	3	2	1	7	2	1	2	1	3	2	1	2	1	1	1	1	4	8	1	0	0	1	2	1	1	2	85	JTT+F+G4
OG0000781	2	1	2	1	3	3	2	2	2	2	1	2	2	1	2	2	10	1	2	1	2	0	1	2	2	1	1	0	2	5	2	1	2	2	2	1	2	2	2	7	2	85	LG+C30+F+G
OG0000782	1	10	1	1	1	1	1	1	5	1	2	1	1	3	1	1	5	3	5	1	1	2	1	1	2	1	2	3	4	2	1	1	1	1	3	4	4	1	1	2	1	85	LG+C20+F+G
OG0000783	1	1	2	1	1	4	4	4	3	5	1	1	1	1	2	1	1	1	4	1	1	2	3	1	4	1	1	1	1	1	3	1	3	4	1	1	2	4	2	5	3	85	LG+C40+F+G
OG0000784	1	2	1	1	1	1	1	1	4	1	2	1	1	4	3	1	3	1	7	1	2	6	6	1	3	1	2	2	1	2	1	2	1	1	2	7	1	1	2	2	1	85	JTT+F+I+G4
OG0000785	0	7	2	0	4	0	0	0	0	2	0	2	2	0	4	3	3	2	3	2	2	2	4	0	4	4	2	6	3	1	0	2	2	0	2	6	4	2	0	3	0	85	LG+C30+F+G
OG0000786	3	0	1	1	0	1	5	3	0	6	2	1	6	0	3	6	2	1	1	2	0	0	0	2	1	4	3	0	1	1	2	2	3	7	0	1	1	1	4	2	5	84	LG+C20+F+G
OG0000787	3	0	1	0	0	0	0	6	0	8	0	0	0	0	0	6	1	0	8	4	0	0	0	0	1	0	0	1	0	1	8	5	5	2	1	0	3	3	8	9	0	84	LG+C30+F+G
OG0000788	3	1	3	4	2	3	1	4	1	1	0	2	1	0	1	2	1	3	3	0	2	4	3	4	2	1	0	1	3	1	2	1	5	3	5	3	2	1	1	1	3	84	JTT+F+G4
OG0000789	1	4	3	2	1	1	1	2	7	1	2	1	2	4	2	3	1	3	6	2	1	5	5	1	2	4	1	1	3	1	1	1	1	1	2	1	1	1	1	0	1	84	JTT+F+I+G4
OG0000790	2	4	2	1	2	1	1	3	3	1	2	3	1	5	3	1	5	2	3	1	1	5	3	3	4	1	1	1	2	1	1	3	3	2	0	3	1	0	1	1	1	84	JTT+F+G4
OG0000791	3	6	1	3	2	1	1	1	2	1	1	2	2	5	3	2	2	1	5	0	5	3	1	1	1	1	1	3	3	2	1	1	2	1	4	3	1	1	1	1	3	84	LG+C40+F+G
OG0000792	4	0	0	0	2	4	5	5	6	4	1	3	0	0	0	0	0	0	8	1	0	0	0	4	0	0	0	0	0	5	3	4	4	4	0	0	3	3	6	0	5	84	LG+C20+F+G
OG0000793	2	3	2	3	1	2	2	2	2	2	2	2	2	2	3	2	2	2	3	2	2	2	2	2	2	2	2	1	3	2	2	2	2	2	2	2	2	2	2	1	2	84	LG+C20+F+G
OG0000794	2	3	1	2	1	1	1	2	5	1	0	1	2	2	5	2	1	2	8	1	1	4	1	1	2	2	0	5	3	1	1	1	1	1	5	5	1	1	1	3	1	84	JTT+F+I+G4
OG0000795	2	2	2	1	3	3	2	2	2	3	0	2	2	2	2	4	2	2	3	2	0	1	0	2	3	4	3	3	1	2	2	1	2	2	3	1	2	2	2	2	3	84	LG+C30+F+G
OG0000796	2	6	2	1	1	1	1	1	3	1	1	3	1	3	5	2	2	3	4	4	1	3	3	1	2	5	1	2	4	1	1	2	1	1	1	3	1	1	1	1	1	84	JTT+F+I+G4
OG0000797	3	2	1	0	2	2	2	3	0	2	0	2	2	2	1	3	3	0	3	0	0	2	1	3	2	3	0	5	3	1	2	10	3	2	3	3	1	2	1	2	2	84	JTT+F+I+G4
OG0000798	2	2	2	2	2	2	2	1	3	2	2	2	2	2	2	2	2	2	2	2	2	2	1	2	2	2	2	3	2	2	2	3	2	2	2	2	2	2	2	3	2	84	LG+C20+F+G
OG0000799	2	3	1	1	1	1	2	1	0	1	2	1	1	3	1	1	3	4	6	2	2	3	7	4	1	2	1	4	4	1	1	4	1	1	3	2	1	1	1	2	1	84	LG+C20+F+G
OG0000800	1	7	1	4	1	1	2	1	1	1	2	2	1	2	1	4	1	2	6	2	4	5	4	1	1	1	1	1	1	1	1	1	3	1	1	2	1	1	1	6	3	84	JTT+F+I+G4
OG0000801	1	5	2	1	3	1	1	1	1	2	0	2	2	1	1	1	2	1	0	7	0	1	0	3	1	2	3	4	3	5	1	2	2	4	1	3	4	4	2	2	2	84	LG+C10+F+G
OG0000802	1	6	1	3	2	1	1	1	2	1	2	1	1	3	1	1	1	3	6	3	2	3	6	1	2	2	1	3	4	2	1	0	2	2	3	2	1	1	1	2	2	84	LG+C20+F+G
OG0000803	1	2	1	2	1	1	1	3	1	1	2	1	1	1	5	2	1	3	10	3	1	3	5	1	3	4	1	1	6	1	1	1	3	1	2	1	1	1	1	1	2	84	JTT+F+I+G4
OG0000804	1	5	1	2	2	1	1	2	6	1	2	1	1	3	2	7	1	2	5	1	4	4	3	1	1	2	2	1	1	1	1	1	2	1	4	3	1	1	1	1	1	84	JTT+F+I+G4
OG0000805	1	5	4	1	4	1	1	1	1	1	0	1	1	1	1	5	2	1	4	7	3	4	4	1	2	4	3	2	2	0	1	1	1	1	1	1	1	1	1	6	1	84	LG+C40+F+G
OG0000806	1	7	1	3	1	1	1	1	4	1	0	2	3	2	0	1	2	3	5	1	0	4	1	2	1	5	1	3	7	1	1	5	1	1	2	4	1	1	1	1	1	84	LG+C20+F+G
OG0000807	2	2	3	1	1	2	2	2	3	2	1	2	1	1	2	3	3	1	5	7	1	0	0	2	2	1	2	0	1	2	2	3	2	2	2	1	5	2	2	3	2	83	LG+C20+F+G
OG0000808	4	2	2	1	2	1	1	3	0	1	0	4	0	1	3	5	2	0	6	1	0	1	1	1	2	4	1	5	2	2	3	1	4	1	4	4	1	1	1	2	3	83	JTT+F+I+G4
OG0000809	2	3	3	4	1	1	1	3	3	1	2	3	1	3	2	1	1	2	7	2	1	4	6	2	1	3	1	1	3	2	4	2	1	1	0	0	0	1	1	1	2	83	JTT+F+G4
OG0000810	2	2	1	1	3	1	2	2	2	2	1	2	1	1	2	4	3	2	10	2	1	1	1	0	1	1	1	1	3	2	1	4	2	3	1	1	3	5	3	2	0	83	LG+C20+F+G
OG0000811	1	1	1	1	1	1	2	2	6	2	3	3	1	3	1	1	6	2	7	2	1	1	0	1	3	0	1	3	5	1	2	3	2	1	4	3	1	1	1	1	1	83	LG+C50+F+G
OG0000812	2	3	2	2	2	1	2	2	2	2	2	2	3	2	2	2	3	2	4	2	1	1	1	2	2	1	1	1	2	2	2	3	2	2	2	4	2	2	2	2	2	83	LG+C30+F+G
OG0000813	3	3	2	4	1	1	3	2	3	2	1	1	1	2	1	2	2	1	7	3	1	1	3	2	1	2	0	1	2	2	2	2	2	2	3	1	1	2	2	4	2	83	LG+C10+F+G
OG0000814	3	1	1	1	3	2	3	2	2	2	0	2	1	2	4	3	1	2	6	2	1	1	0	2	1	2	0	2	4	1	2	1	4	3	3	2	2	3	2	1	3	83	LG+C20+F+G
OG0000815	2	3	1	2	1	1	1	3	0	2	0	2	1	2	1	0	1	0	2	2	1	2	4	5	2	1	2	2	4	1	5	1	5	2	1	3	2	1	2	1	9	83	JTT+F+I+G4
OG0000816	2	2	2	1	2	2	2	2	2	2	2	3	1	3	1	1	2	2	3	2	2	2	3	2	2	1	3	3	2	2	2	2	2	2	2	2	2	2	2	2	2	83	LG+C10+F+G
OG0000817	1	4	1	1	1	1	1	1	1	1	3	1	1	5	3	1	1	1	6	2	2	5	4	1	2	1	2	3	1	1	2	10	1	1	1	3	1	1	1	2	1	83	LG+C20+F+G
OG0000818	2	2	3	2	2	2	2	2	2	2	3	2	2	3	2	2	3	1	5	4	0	2	0	1	2	2	3	0	2	1	2	2	2	2	2	2	2	2	2	2	2	83	LG+C20+F+G
OG0000819	2	2	2	2	2	2	2	2	2	2	2	2	1	1	1	3	3	1	5	0	2	3	2	2	2	3	2	1	1	2	1	3	2	2	2	2	4	2	2	2	2	83	LG+C30+F+G
OG0000820	1	3	6	1	1	0	1	2	1	1	2	1	2	0	4	3	1	3	1	1	6	3	4	1	2	2	2	1	2	1	1	1	1	1	1	3	10	0	1	4	1	83	LG+C30+F+G
OG0000821	1	3	2	1	2	1	2	3	0	2	1	1	1	3	4	1	7	1	2	3	2	3	1	1	3	1	1	8	2	4	1	3	2	2	1	1	1	2	1	1	1	83	C60
OG0000822	1	2	1	4	1	1	2	2	2	2	3	2	1	3	1	2	1	4	5	3	1	0	4	6	1	2	1	3	1	1	1	1	3	1	3	2	1	1	2	3	2	83	LG+C40+F+G
OG0000823	1	9	1	1	0	1	1	1	1	1	3	1	2	3	5	1	0	2	9	1	4	1	7	1	1	1	5	4	1	1	1	0	4	2	1	1	1	1	1	0	1	83	LG+C30+F+G
OG0000824	2	4	1	3	2	2	2	2	1	3	3	1	1	3	1	2	1	2	5	1	2	2	1	3	2	3	3	2	1	1	4	2	3	2	1	4	1	1	1	1	1	83	LG+C20+F+G
OG0000825	2	2	3	1	1	1	3	1	2	3	1	2	0	1	1	3	5	1	5	3	3	2	2	2	1	2	1	2	2	1	2	4	2	2	2	3	2	2	2	2	1	83	JTT+F+R4
OG0000826	1	2	3	3	2	1	1	1	1	1	3	3	2	3	2	1	4	1	6	2	5	5	2	1	0	1	2	0	5	3	1	4	0	1	2	3	2	0	0	2	1	83	LG+C10+F+G
OG0000827	1	4	3	4	1	1	2	1	0	2	1	5	2	3	3	3	1	5	3	1	3	3	4	1	1	3	2	1	2	1	1	1	1	1	2	3	1	1	1	2	2	83	JTT+F+I+G4
OG0000828	1	2	8	2	2	1	1	1	1	1	2	0	2	2	1	7	4	2	3	0	2	2	3	1	2	0	3	0	2	2	1	6	1	1	2	2	5	1	1	2	1	83	LG+C20+F+G
OG0000829	1	1	1	6	1	1	1	1	1	1	3	1	1	3	3	1	1	3	9	2	0	2	5	1	1	3	2	4	3	1	2	1	1	1	5	3	1	1	2	1	1	83	LG+C30+F+G
OG0000830	1	6	1	1	1	1	1	1	2	1	3	5	1	2	2	1	5	2	7	3	3	2	3	1	2	1	1	2	1	1	1	4	2	1	1	3	1	1	1	3	1	83	LG+C20+F+G
OG0000831	1	4	1	4	1	1	1	1	1	1	3	2	2	4	2	4	2	1	7	3	1	1	0	1	1	3	2	3	2	2	1	1	3	1	4	6	1	1	1	1	1	83	JTT+F+I+G4
OG0000832	1	0	1	3	1	3	2	3	6	1	0	2	1	2	3	1	1	2	6	2	1	5	1	1	1	2	1	0	1	5	3	1	3	3	3	2	0	1	1	3	3	82	JTT+F+R6
OG0000833	5	2	1	1	2	1	5	2	0	2	0	5	1	3	3	3	2	2	3	1	0	0	2	2	2	2	2	0	1	1	4	1	2	4	4	4	2	1	1	2	1	82	JTT+F+I+G4
OG0000834	1	5	2	4	2	1	1	1	4	3	1	0	1	3	1	1	1	1	5	2	6	1	3	1	1	1	4	2	1	1	1	7	2	1	4	1	1	1	1	1	1	82	LG+C20+F+G
OG0000835	3	0	2	0	3	2	2	3	0	1	2	3	2	2	1	4	2	1	1	2	0	0	0	2	2	3	0	6	4	2	2	5	4	2	1	0	2	2	2	4	3	82	JTT+F+G4
OG0000836	2	0	2	6	2	2	1	3	0	7	1	5	6	3	0	2	2	1	2	2	0	1	0	2	1	4	1	1	1	1	5	1	3	1	1	0	1	1	1	1	6	82	LG+C20+F+G
OG0000837	1	3	1	1	1	1	1	3	0	1	0	2	1	1	3	5	4	2	4	3	1	3	1	2	3	2	1	0	1	1	4	1	4	1	3	5	1	2	1	1	5	81	LG+C20+F+G
OG0000838	3	1	3	1	1	1	1	3	4	3	3	4	1	3	3	1	4	3	3	2	0	3	1	1	2	4	2	1	2	1	3	1	4	1	2	0	0	2	2	1	1	82	JTT+F+G4
OG0000839	2	2	2	2	2	2	2	2	2	3	2	2	1	2	2	2	2	2	4	1	2	2	2	1	1	2	2	2	2	2	2	2	2	2	2	3	2	2	2	2	2	82	LG4M
OG0000840	1	4	1	1	1	1	1	3	5	1	1	2	1	2	3	1	3	3	6	1	3	4	3	1	1	1	1	3	1	1	2	1	5	1	3	1	1	2	1	3	1	82	JTT+F+I+G4
OG0000841	2	0	1	0	4	0	9	3	4	3	0	0	1	3	0	1	5	0	10	2	0	1	0	1	1	0	1	1	0	2	3	2	3	5	0	0	3	3	4	4	0	82	LG+C10+F+G
OG0000842	2	2	2	2	2	2	2	2	2	2	2	2	2	3	2	2	2	2	2	2	2	3	3	2	2	1	2	2	2	1	2	2	2	2	2	2	2	2	2	1	2	82	LG4M
OG0000843	2	3	1	2	1	3	3	2	2	2	2	2	1	3	2	2	2	2	2	2	1	1	1	2	2	1	2	0	2	7	2	2	2	2	2	3	1	2	2	1	3	82	LG+C30+F+G
OG0000844	2	1	1	2	2	1	3	3	3	3	1	1	2	1	1	3	3	1	6	2	2	1	1	2	2	1	1	3	4	1	3	2	3	3	1	1	1	3	3	1	1	82	LG+C40+F+G
OG0000845	1	5	1	1	2	1	1	1	4	1	3	1	1	3	1	1	1	3	6	2	7	3	6	1	5	2	1	1	4	1	1	1	1	1	1	1	0	1	1	2	1	82	LG+C50+F+G
OG0000846	1	6	1	1	1	2	2	3	3	1	2	2	2	3	1	2	1	1	4	2	1	3	3	2	1	4	1	3	1	1	2	1	3	2	3	2	1	2	2	1	2	82	JTT+F+I+G4
OG0000847	2	3	1	3	1	2	2	2	1	2	3	1	2	3	1	3	2	3	2	3	2	5	3	2	1	2	1	0	1	2	2	2	2	2	2	2	2	2	2	1	2	82	LG+C20+F+G
OG0000848	2	2	1	3	2	1	2	2	2	2	2	2	2	2	2	3	1	2	5	2	2	2	3	2	2	2	2	1	2	2	2	2	2	2	2	1	2	2	2	1	2	82	JTT+F+I+G4
OG0000849	1	3	2	2	1	1	1	2	5	1	3	1	1	3	7	1	2	1	6	2	5	5	7	1	2	1	1	1	1	1	1	1	1	1	1	1	1	1	1	1	1	82	LG+C30+F+G
OG0000850	3	0	0	0	3	6	3	3	3	5	0	4	1	0	0	0	2	0	2	0	0	1	0	2	2	0	0	0	0	3	6	4	2	5	0	0	2	3	6	5	6	82	LG+C30+F+G
OG0000851	2	5	1	3	1	2	3	3	0	4	0	7	1	2	0	3	1	0	2	2	0	1	1	3	2	2	0	5	1	0	4	1	5	2	4	0	1	1	3	1	3	82	JTT+F+I+G4
OG0000852	2	6	2	2	2	2	2	2	2	2	3	1	2	1	1	1	1	2	6	1	3	1	4	1	1	4	1	1	1	2	2	1	2	2	2	2	1	2	2	3	1	82	LG+C20+F+G
OG0000853	2	4	3	3	2	2	1	1	4	1	0	2	4	3	4	2	1	5	5	2	1	0	3	2	2	3	0	0	4	0	2	1	2	1	1	3	1	2	1	1	1	82	JTT+F+I+G4
OG0000854	2	9	1	1	1	3	2	3	4	3	1	1	1	1	0	1	4	1	3	1	3	1	2	1	1	2	1	0	2	4	2	1	3	2	4	1	1	2	3	1	2	82	LG+C20+F+G
OG0000855	1	6	2	2	2	1	1	1	1	1	3	1	2	2	1	2	2	2	8	2	2	3	2	1	2	2	2	2	2	2	1	2	1	4	2	2	2	1	1	2	1	82	LG+C20+F+G
OG0000856	1	2	3	1	3	1	1	1	4	5	4	1	1	2	2	1	3	2	3	2	0	2	1	1	2	2	4	4	1	2	1	2	2	1	5	4	1	1	1	1	1	82	LG+C20+F+G
OG0000857	1	0	0	0	0	10	11	2	9	7	0	2	0	0	0	0	0	0	0	0	0	1	0	0	0	0	0	0	0	1	4	0	1	12	0	0	0	4	9	0	8	82	LG+C20+F+G
OG0000858	0	0	10	0	19	1	1	2	0	0	0	3	1	2	0	8	0	11	3	1	0	0	0	0	1	0	4	0	0	1	0	3	1	1	0	0	7	0	1	1	0	82	LG+C30+F+G
OG0000859	0	0	24	0	0	0	0	0	0	0	0	0	3	1	0	1	0	0	3	0	0	0	0	0	0	0	0	1	0	0	0	38	0	0	2	0	5	2	0	2	0	82	C60
OG0000860	1	1	1	7	1	1	1	2	1	3	0	5	6	4	1	2	4	0	1	1	0	0	0	1	2	3	0	3	6	1	1	1	4	3	2	4	1	1	1	1	3	81	LG+C50+F+G
OG0000861	3	1	1	1	1	1	4	3	4	5	2	8	1	2	1	1	1	1	2	1	1	0	1	2	1	1	1	1	1	1	3	1	4	4	1	1	3	3	2	1	4	81	LG+C20+F+G
OG0000862	2	5	3	1	2	2	2	3	2	2	2	2	2	1	0	2	2	1	4	2	2	3	2	2	1	1	2	1	3	2	2	2	2	2	3	2	1	1	2	1	2	81	LG4X
OG0000863	5	0	2	2	2	1	1	6	1	1	2	1	2	0	1	1	4	0	3	2	0	1	0	5	2	0	0	4	6	5	3	1	2	1	4	4	2	1	2	1	0	81	LG+C20+F+G
OG0000864	2	6	1	1	2	2	2	2	1	2	2	2	2	3	1	2	1	2	2	2	2	1	2	2	2	2	2	3	1	2	2	2	2	2	2	2	2	2	2	2	2	81	LG+C40+F+G
OG0000865	2	5	2	3	2	1	2	3	2	2	2	2	2	1	2	1	3	2	4	1	2	1	1	2	1	1	2	2	1	2	2	1	3	2	4	1	1	2	2	2	2	81	LG+C60+F+G
OG0000866	1	8	1	2	1	1	1	1	5	1	3	2	1	2	3	1	1	2	7	1	1	4	4	1	2	3	1	1	4	1	1	1	1	2	3	1	1	1	1	1	1	81	LG+C20+F+G
OG0000867	3	0	1	3	3	5	5	5	4	3	1	1	1	1	1	1	1	2	5	2	1	0	3	1	1	0	3	0	0	1	2	4	4	4	0	0	1	2	2	1	3	81	LG+C40+F+G
OG0000868	2	1	3	2	3	1	2	2	3	2	1	2	1	2	1	2	2	2	4	2	1	2	2	3	3	2	0	3	2	2	2	2	2	2	2	1	2	2	2	2	2	81	LG+C10+F+G
OG0000869	2	3	1	2	1	1	1	3	2	1	0	1	1	0	3	4	2	4	2	1	0	4	5	2	4	2	0	6	2	2	3	0	1	1	1	2	1	1	1	3	5	81	C60
OG0000870	2	3	3	3	2	2	2	2	2	2	2	3	3	2	2	2	2	2	5	2	3	0	1	2	2	2	2	0	3	1	2	1	2	2	1	1	2	2	2	1	1	81	LG+C30+F+G
OG0000871	1	1	3	1	1	1	1	2	1	1	4	3	1	5	2	1	1	3	6	3	1	2	3	1	2	4	2	3	1	1	1	1	3	1	1	4	1	1	1	1	4	81	LG+C30+F+G
OG0000872	1	4	1	6	1	1	1	2	2	1	3	2	1	3	3	2	2	2	5	1	1	3	0	0	1	1	2	4	1	2	3	1	3	1	4	2	2	2	1	1	2	81	LG+C20+F+G
OG0000873	1	4	1	4	1	2	1	3	1	0	1	2	1	2	5	1	1	3	5	3	1	4	4	1	2	2	1	3	2	1	1	2	5	1	2	2	1	1	1	1	1	81	LG+C40+F+G
OG0000874	4	2	2	4	2	1	3	3	1	3	0	2	4	3	3	1	1	1	3	1	1	0	1	2	1	0	3	4	1	1	2	1	2	2	2	5	2	1	1	2	2	80	LG+C20+F+G
OG0000875	2	1	3	4	1	1	1	2	1	1	1	1	6	6	4	4	1	0	7	2	1	0	0	2	1	6	1	1	5	2	1	1	1	1	2	1	1	1	1	1	1	80	LG+C20+F+G
OG0000876	2	1	5	2	4	2	0	2	0	2	1	2	1	2	2	2	4	0	4	3	2	0	0	3	3	1	1	3	1	3	2	3	2	2	1	0	4	2	2	2	2	80	JTT+F+G4
OG0000877	2	1	2	2	2	1	2	2	1	2	2	3	1	1	1	2	4	1	4	3	2	4	3	1	1	1	3	2	0	2	2	2	1	2	1	1	4	3	2	3	1	80	LG+C40+F+G
OG0000878	5	0	2	3	2	4	6	3	2	2	2	5	0	2	0	1	1	2	2	1	0	0	0	2	1	0	2	0	1	1	6	3	4	9	0	0	1	1	1	1	2	80	LG+C30+F+G
OG0000879	2	2	2	2	3	2	2	2	1	2	2	2	2	2	1	2	2	2	3	2	2	2	2	2	1	2	2	2	2	1	2	2	2	2	2	2	2	2	2	2	2	80	LG+C20+F+G
OG0000880	1	1	1	3	2	1	2	3	3	3	1	1	2	3	2	2	3	2	4	1	1	2	2	2	2	2	1	1	2	3	2	1	2	2	3	2	2	2	1	1	3	80	LG4M
OG0000881	1	9	1	4	2	1	1	1	2	1	1	1	1	3	3	1	1	4	5	2	1	6	6	1	2	1	1	3	1	1	1	1	1	1	1	2	1	1	1	1	1	80	LG+C20+F+G
OG0000882	4	4	1	3	1	1	2	2	2	2	4	1	1	1	2	5	3	2	3	1	3	5	3	1	1	4	1	1	2	1	1	1	2	2	2	0	1	1	1	1	1	80	LG+C30+F+G
OG0000883	3	3	1	3	1	1	1	3	0	3	1	6	6	1	3	2	1	2	3	1	0	0	2	3	1	5	2	0	2	1	1	1	2	1	3	3	1	1	1	2	3	80	LG+C20+F+G
OG0000884	2	2	3	3	3	2	1	1	2	2	2	2	3	2	2	2	3	2	3	3	1	1	2	1	3	1	2	1	2	2	2	2	2	1	2	2	2	2	2	1	1	80	LG+C10+F+G
OG0000885	1	1	3	6	7	2	2	1	0	0	1	1	2	0	1	0	3	2	2	2	3	2	1	0	0	4	1	0	2	1	0	9	1	2	4	2	1	2	2	6	0	80	LG+C10+F+G
OG0000886	2	5	1	1	1	2	3	3	5	1	1	2	1	3	1	4	1	1	5	3	1	2	2	2	2	1	1	4	2	1	2	2	1	1	1	1	1	1	2	2	2	80	JTT+F+I+G4
OG0000887	2	1	2	3	2	1	1	2	2	2	0	3	4	3	2	1	2	3	6	1	1	1	1	1	2	3	1	1	3	2	1	2	2	2	2	3	2	2	1	2	2	80	JTT+F+I+G4
OG0000888	1	1	1	5	2	2	3	2	2	3	0	1	4	4	2	2	1	1	4	1	1	2	4	1	2	3	2	2	1	1	1	1	4	3	2	3	1	1	1	1	1	80	LG+C20+F+G
OG0000889	2	6	2	2	2	1	1	1	1	2	3	1	2	4	2	2	1	2	6	1	2	3	2	1	2	2	2	1	2	1	1	1	4	1	2	2	1	1	1	1	3	80	JTT+F+I+G4
OG0000890	1	2	1	2	2	3	4	2	2	3	3	2	2	1	0	1	1	2	3	2	2	3	1	1	1	2	2	1	2	2	3	2	3	3	1	2	1	0	3	3	3	80	LG+C20+F+G
OG0000891	1	3	1	1	1	1	1	2	4	1	4	1	1	3	5	1	1	4	5	3	2	5	4	1	2	1	1	1	1	1	1	2	4	1	1	1	1	1	1	3	1	80	LG+C20+F+G
OG0000892	1	1	1	3	1	1	2	1	2	1	1	2	1	1	1	3	1	2	12	2	1	2	4	1	2	4	3	2	3	1	1	1	2	1	2	5	1	1	1	1	1	80	LG+C30+F+G
OG0000893	1	2	2	1	1	1	1	1	5	1	3	2	3	3	1	1	1	4	8	1	2	4	3	2	2	2	1	3	3	1	1	1	2	1	1	3	1	1	1	1	1	80	LG+C40+F+G
OG0000894	1	3	1	1	3	1	1	1	2	1	3	1	1	1	2	4	1	4	5	3	2	4	5	1	1	1	2	5	2	1	1	3	1	1	2	2	1	1	1	2	1	80	JTT+F+I+G4
OG0000895	2	4	1	1	3	2	4	2	1	3	1	4	2	0	1	1	3	1	0	0	0	0	0	4	2	0	0	0	0	12	3	3	1	2	0	1	7	3	3	1	2	80	LG+C40+F+G
OG0000896	1	4	3	1	1	1	1	1	4	1	3	1	1	3	1	1	2	2	8	2	2	3	4	1	2	4	2	3	1	1	1	1	1	1	1	4	1	1	1	2	1	80	LG+C20+F+G
OG0000897	0	0	0	0	0	0	0	0	0	0	0	0	0	0	0	0	0	78	0	0	0	1	0	0	0	0	0	0	0	0	0	0	0	0	0	1	0	0	0	0	0	80	JTT+F+R4
OG0000898	1	7	1	1	3	1	1	1	4	1	1	1	1	3	2	1	1	2	7	1	2	5	6	1	1	1	1	3	1	1	1	1	1	1	2	4	1	1	1	2	1	79	LG+C60+F+G
OG0000899	3	2	1	1	2	2	1	3	1	2	1	2	2	3	1	1	2	2	3	2	3	3	2	2	2	2	1	1	2	2	2	2	3	2	1	1	2	2	2	3	2	79	JTT+F+I+G4
OG0000900	1	7	1	3	1	2	2	2	4	2	3	3	2	3	1	1	1	4	4	2	3	2	1	2	1	3	1	1	1	1	2	2	2	1	1	0	1	2	1	1	1	79	JTT+F+I+G4
OG0000901	1	3	1	1	1	1	2	1	2	1	2	1	1	2	2	3	2	2	7	3	1	5	3	1	3	3	3	2	3	1	1	1	1	1	2	2	2	1	2	1	1	79	JTT+F+G4
OG0000902	1	3	1	4	1	1	1	1	1	1	2	1	1	3	2	1	1	1	9	1	1	3	5	1	2	3	1	2	3	1	1	1	2	1	4	6	1	1	1	1	1	79	LG+C30+F+G
OG0000903	2	2	1	2	1	1	3	1	7	1	3	3	1	1	1	1	1	1	3	2	1	4	2	1	1	4	2	1	2	2	1	2	1	2	7	2	1	2	1	1	1	79	LG+C20+F+G
OG0000904	1	1	1	3	0	1	1	2	5	1	2	2	1	4	0	5	2	3	4	2	1	3	1	1	1	4	1	4	3	1	2	2	3	1	1	4	1	1	1	1	1	79	LG+C20+F+G
OG0000905	3	4	1	2	2	3	2	1	1	3	2	2	1	2	4	1	0	2	7	1	0	2	1	1	0	2	2	0	2	1	5	1	3	1	2	4	1	1	1	1	3	78	JTT+F+I+G4
OG0000906	2	2	2	1	2	1	1	2	4	1	2	1	1	4	1	2	2	2	5	1	1	7	3	1	2	2	2	0	1	1	1	1	2	3	1	5	1	2	1	2	1	79	JTT+F+I+G4
OG0000907	2	3	1	2	1	1	1	1	1	1	2	1	1	4	3	1	1	3	5	2	3	2	5	1	3	4	1	1	4	1	1	1	2	1	4	3	1	1	1	1	1	79	LG+C40+F+G
OG0000908	1	5	2	2	2	1	1	4	1	1	1	1	1	0	3	4	2	0	5	1	1	2	3	1	3	5	1	2	3	2	1	2	1	1	2	3	1	1	1	1	4	79	LG+C20+F+G
OG0000909	1	1	3	1	1	1	1	1	2	1	3	2	4	4	1	5	1	2	4	3	2	2	4	1	1	1	0	4	1	2	0	1	2	1	2	1	1	1	2	7	1	79	JTT+F+I+G4
OG0000910	2	0	2	0	1	0	0	0	0	1	3	0	19	0	2	2	2	2	9	1	0	0	0	1	1	0	0	6	5	0	1	3	1	0	3	3	5	0	2	1	1	79	WAG+F+G4
OG0000911	1	6	1	1	3	1	1	1	3	1	1	1	1	2	4	1	2	1	6	1	1	5	5	1	1	1	2	4	1	2	1	2	4	1	2	2	1	1	1	1	1	79	LG+C30+F+G
OG0000912	2	0	1	2	1	2	2	2	3	2	4	2	2	2	3	2	1	1	12	1	3	4	0	2	2	1	0	2	0	3	2	3	2	2	0	0	1	1	1	1	2	79	LG+C30+F+G
OG0000913	1	1	3	4	1	1	1	1	3	1	1	1	5	1	1	2	2	3	7	1	2	3	5	1	1	3	3	1	2	1	1	1	1	1	3	3	1	1	1	2	1	79	LG+C20+F+G
OG0000914	2	1	2	2	2	2	2	2	2	2	2	1	2	1	2	2	4	2	1	2	1	1	2	2	2	2	2	1	3	2	2	2	2	2	3	1	3	2	2	2	2	79	C60
OG0000915	5	0	1	2	2	3	5	4	0	2	0	3	1	0	2	2	1	0	7	1	0	0	0	5	1	0	0	1	3	1	3	1	3	7	3	0	3	1	5	1	0	79	LG+C20+F+G
OG0000916	2	2	2	1	1	1	2	2	3	2	1	2	1	2	4	1	2	1	3	1	1	1	2	2	2	1	1	3	2	2	2	3	2	3	1	1	5	2	2	3	2	79	LG+C40+F+G
OG0000917	2	9	2	1	1	1	1	2	2	1	2	1	1	3	1	1	1	1	5	2	2	8	4	1	2	3	1	2	3	1	1	1	1	1	1	2	1	1	1	1	1	79	LG+C20+F+G
OG0000918	2	3	2	3	2	2	2	2	2	2	1	2	1	2	2	1	2	1	5	1	1	2	1	2	1	4	0	3	1	2	1	2	2	2	1	1	2	2	3	2	4	79	LG+C10+F+G
OG0000919	1	4	1	0	1	2	3	3	3	2	1	1	1	1	1	1	2	2	4	1	2	3	1	1	3	1	1	2	2	1	2	3	1	3	1	3	2	2	3	4	3	79	LG+C30+F+G
OG0000920	2	2	2	3	4	1	1	2	2	1	2	2	2	1	2	2	1	3	4	3	2	2	2	2	2	2	1	2	2	1	2	1	1	3	2	2	2	2	1	1	2	79	LG+C20+F+G
OG0000921	2	4	1	1	1	2	1	1	2	1	2	1	1	2	1	2	1	2	6	1	1	4	4	1	1	2	4	2	2	2	1	1	2	1	5	4	2	1	1	1	2	79	LG+C30+F+G
OG0000922	2	3	1	1	2	1	4	2	2	3	2	2	1	1	2	2	2	1	6	1	1	2	1	2	3	1	1	4	1	2	2	1	2	2	2	3	1	2	2	1	2	79	LG+C40+F+G
OG0000923	1	6	2	1	1	1	1	1	0	1	4	1	1	3	3	1	2	3	6	1	2	4	3	1	2	1	2	2	1	1	1	8	1	1	1	3	1	1	1	1	1	79	JTT+F+I+G4
OG0000924	1	1	1	2	2	1	2	3	2	2	1	3	3	1	1	3	2	3	3	4	2	2	2	1	1	2	1	2	2	2	2	2	2	2	4	1	1	2	2	2	1	79	LG+C20+F+G
OG0000925	1	1	2	2	2	2	3	4	3	3	2	2	2	1	1	2	2	2	3	2	2	1	1	2	1	1	1	1	2	3	2	2	2	3	2	1	1	3	3	1	2	79	LG+C20+F+G
OG0000926	1	3	2	1	1	2	2	1	2	2	3	2	3	2	2	1	2	3	4	2	2	1	2	2	2	2	2	2	3	2	0	2	2	2	2	1	2	2	1	2	1	78	LG+C10+F+G
OG0000927	5	6	1	2	2	1	1	1	3	1	3	1	1	3	3	1	1	1	13	1	3	2	2	1	3	1	1	0	1	1	1	1	2	1	1	1	1	1	1	1	1	78	JTT+F+I+G4
OG0000928	1	3	1	2	3	1	1	1	1	1	1	1	2	2	2	3	2	3	7	3	3	1	1	1	2	3	2	2	2	3	1	1	1	1	2	2	3	1	1	3	1	78	LG+C20+F+G
OG0000929	2	3	2	3	3	2	2	2	1	1	0	2	2	2	0	2	3	2	2	2	2	2	0	2	2	2	2	1	2	2	2	3	2	2	2	2	2	2	2	2	2	78	LG+C20+F+G
OG0000930	1	8	2	2	1	1	1	1	2	1	2	1	1	2	4	1	1	1	6	1	2	5	5	1	1	1	1	3	2	2	1	1	1	1	2	4	1	1	1	1	1	78	LG+C20+F+G
OG0000931	2	0	2	1	1	2	2	2	1	2	1	1	1	1	3	1	3	1	4	1	0	1	0	4	2	0	3	1	4	2	2	4	2	2	3	3	3	2	2	2	4	78	LG+C20+F+G
OG0000932	1	2	2	2	1	2	1	2	2	2	2	2	2	2	2	2	2	1	4	1	3	2	2	1	1	2	2	1	2	2	3	2	2	2	3	2	1	1	2	3	2	78	LG+C30+F+G
OG0000933	2	2	2	2	1	2	2	2	1	2	1	2	1	2	1	3	2	2	3	2	2	2	2	2	2	1	2	2	1	2	2	3	2	2	2	2	1	2	2	3	2	78	JTT+F+G4
OG0000934	1	3	1	2	2	1	1	1	3	1	3	1	1	5	1	1	1	3	4	1	1	3	5	1	4	1	3	5	1	2	1	2	1	1	1	4	1	1	1	1	1	78	LG+C40+F+G
OG0000935	1	2	1	1	2	1	2	1	1	1	4	1	2	2	2	1	1	1	4	3	3	3	4	1	3	1	1	1	1	5	1	3	4	1	1	1	3	1	1	2	2	77	LG+C20+F+G
OG0000936	2	1	3	1	3	3	3	2	2	3	1	3	1	1	2	1	3	1	3	0	1	1	1	2	1	1	1	1	1	1	3	2	3	3	1	1	3	3	3	3	3	78	LG4M
OG0000937	2	3	2	2	2	2	3	3	3	3	1	2	2	2	2	2	1	1	2	0	1	1	1	1	0	2	1	1	1	3	3	2	3	3	2	2	3	2	2	2	2	78	LG+C20+F+G
OG0000938	1	2	1	3	2	2	2	0	2	2	2	4	2	1	1	2	2	1	4	1	2	3	3	2	1	2	1	2	2	1	2	3	2	2	1	2	3	2	1	2	2	78	LG+C20+F+G
OG0000939	3	0	1	2	4	2	4	2	1	1	3	2	1	4	1	3	1	2	2	1	2	0	2	2	1	2	5	2	3	1	2	1	2	2	4	1	1	2	1	1	1	78	LG+C20+F+G
OG0000940	2	4	0	4	1	1	1	1	2	1	2	3	2	3	2	2	1	1	7	1	1	2	2	1	2	4	0	1	1	2	4	1	1	1	1	3	1	2	1	3	3	78	JTT+F+I+G4
OG0000941	1	5	1	2	1	1	2	1	2	2	3	2	1	1	3	2	1	2	7	3	1	4	3	1	1	1	1	4	1	2	1	1	1	3	1	5	1	0	1	1	1	78	LG+C40+F+G
OG0000942	1	6	1	2	1	1	3	1	2	3	3	1	1	2	2	2	1	2	6	2	1	5	4	1	2	2	2	1	2	1	1	1	1	2	1	1	2	1	1	2	1	78	LG+C20+F+G
OG0000943	1	2	1	2	2	1	2	2	1	2	1	2	2	2	2	2	1	1	4	1	3	1	0	2	2	3	2	4	3	1	1	1	4	4	2	3	1	1	2	1	3	78	LG+C30+F+G
OG0000944	1	4	5	4	3	1	1	0	1	2	2	1	4	0	0	2	2	3	0	5	2	1	1	1	1	2	1	0	3	1	2	1	1	1	3	3	7	1	1	2	2	78	LG+C40+F+G
OG0000945	1	2	2	1	1	1	1	1	2	1	3	1	1	3	2	2	1	1	5	4	1	6	5	1	3	1	2	1	5	1	1	1	1	1	4	2	2	1	1	1	1	78	LG+C40+F+G
OG0000946	1	1	1	1	2	2	2	2	1	2	1	2	2	2	2	1	2	1	2	3	0	3	0	2	3	2	2	3	3	2	2	2	3	3	2	1	2	3	2	2	2	77	LG+C20+F+G
OG0000947	3	3	1	0	1	2	6	3	0	3	0	1	3	3	0	3	3	1	1	2	1	1	2	4	1	1	1	0	1	1	3	3	3	5	2	2	1	1	1	2	2	77	LG+C20+F+G
OG0000948	3	3	1	3	2	1	1	2	4	2	2	1	2	2	4	1	1	2	7	1	1	0	1	1	1	2	2	3	2	2	1	1	2	1	1	5	1	1	1	2	1	77	LG+C20+F+G
OG0000949	1	6	1	4	2	1	3	1	2	1	1	1	1	4	5	1	1	3	4	2	1	2	1	1	1	1	2	2	1	1	2	1	1	1	3	3	2	1	1	2	2	77	JTT+F+I+G4
OG0000950	2	2	1	3	2	2	2	3	2	2	1	3	2	2	1	2	1	1	5	1	1	3	1	2	2	1	1	1	1	2	2	2	3	2	1	2	1	2	2	3	2	77	LG+C30+F+G
OG0000951	2	2	3	3	2	1	1	2	1	3	1	1	3	0	0	2	1	1	5	3	1	0	1	3	1	0	1	0	3	1	2	2	5	4	1	1	2	2	4	2	4	77	JTT+F+G4
OG0000952	3	2	2	1	3	2	1	2	1	1	1	2	2	2	1	1	2	2	5	1	1	1	0	2	1	1	1	1	4	2	1	4	4	2	4	2	2	2	2	1	2	77	LG+C20+F+G
OG0000953	5	6	1	0	3	1	1	4	0	3	0	1	3	2	3	3	2	0	5	0	0	0	0	1	2	2	2	0	2	1	4	2	3	2	1	5	1	1	1	1	3	77	JTT+F+I+G4
OG0000954	1	3	1	1	1	1	1	1	2	1	1	1	1	2	5	2	1	3	6	1	1	4	6	1	1	3	1	2	3	1	1	1	1	1	2	7	1	1	1	1	1	77	LG+C20+F+G
OG0000955	1	5	2	2	2	1	1	1	2	1	3	2	1	3	1	1	2	4	5	2	4	2	6	1	3	1	1	1	1	1	1	1	1	2	2	3	1	1	1	1	0	77	JTT+F+I+G4
OG0000956	2	3	2	1	1	1	1	1	2	1	3	2	2	4	4	1	1	2	10	2	0	0	0	1	2	3	0	1	3	1	1	1	3	1	4	5	1	1	1	1	1	77	LG+C20+F+G
OG0000957	2	1	3	1	2	2	2	2	4	2	1	2	1	2	2	0	3	2	5	1	1	1	1	2	2	1	1	0	0	3	2	4	2	2	1	1	2	2	2	5	2	77	LG+C20+F+G
OG0000958	5	2	1	1	6	2	2	2	1	3	0	3	2	1	2	3	1	0	2	3	1	1	3	1	0	3	0	2	2	2	4	1	3	2	2	1	1	3	1	0	2	77	JTT+F+G4
OG0000959	1	4	1	3	2	1	1	1	3	2	3	2	1	4	2	1	0	2	4	1	2	2	1	3	1	2	2	5	3	1	1	1	2	1	2	3	1	1	1	2	1	77	JTT+F+I+G4
OG0000960	2	1	1	0	1	3	4	4	3	5	1	2	1	1	0	2	1	1	4	1	1	1	1	2	1	1	1	1	2	3	3	1	2	3	1	1	2	5	5	0	2	77	LG+C10+F+G
OG0000961	1	7	1	1	1	1	1	1	1	1	3	1	1	4	2	3	1	2	7	1	3	4	5	1	2	2	2	2	1	2	1	1	1	1	1	3	0	1	1	1	1	77	LG+C20+F+G
OG0000962	2	2	2	2	2	2	2	2	2	2	1	2	2	2	2	1	2	0	3	2	2	2	2	2	2	2	2	1	2	2	2	1	2	2	2	2	3	2	2	1	2	77	LG4X
OG0000963	4	0	2	2	0	3	4	3	0	3	2	2	2	1	0	7	2	2	0	0	0	1	0	2	2	0	2	0	2	2	4	3	4	2	0	0	4	4	2	2	2	77	LG+C60+F+G
OG0000964	1	1	1	3	1	1	1	4	3	1	1	4	1	3	1	3	1	3	4	1	1	3	3	1	1	1	0	1	1	3	1	1	3	3	3	4	2	1	2	1	2	77	JTT+F+I+G4
OG0000965	2	2	1	1	2	3	2	3	1	1	2	2	1	1	2	1	1	3	5	1	4	4	7	1	2	1	1	0	0	1	1	2	3	2	0	5	1	1	2	1	1	77	JTT+F+R4
OG0000966	1	3	2	1	7	1	1	0	1	1	1	1	2	1	2	1	2	1	4	1	2	0	0	1	1	3	3	0	2	1	1	3	1	1	3	3	9	1	1	6	1	77	LG+C40+F+G
OG0000967	1	3	1	4	2	1	1	1	1	1	2	2	2	3	2	1	3	3	7	4	1	0	0	1	4	3	1	1	2	2	1	1	5	1	2	2	1	1	1	1	1	77	LG+C20+F+G
OG0000968	1	2	1	3	2	1	1	1	2	1	2	3	2	2	1	3	1	2	5	2	1	1	1	1	2	2	2	2	2	1	1	1	2	1	6	5	1	2	3	1	1	77	LG+C20+F+G
OG0000969	1	2	2	1	4	2	3	2	0	1	1	0	1	2	3	1	3	1	2	3	0	2	0	1	2	2	2	5	2	3	4	1	3	1	2	1	2	3	2	2	2	77	LG+C10+F+G
OG0000970	2	4	2	1	1	1	3	1	1	2	4	3	1	2	1	2	3	2	2	1	0	0	3	4	1	2	1	3	3	1	2	1	3	3	1	1	1	1	1	1	5	77	LG+C20+F+G
OG0000971	1	4	3	4	1	1	1	1	1	1	2	1	3	1	4	4	1	2	5	2	3	5	4	1	1	2	0	1	2	1	1	1	1	2	0	2	1	1	2	2	1	77	JTT+F+G4
OG0000972	1	6	1	1	2	1	1	2	1	1	1	1	3	2	3	1	1	2	7	2	1	1	0	1	1	4	0	5	5	1	1	1	1	1	5	4	1	1	1	1	1	77	LG+C20+F+G
OG0000973	0	1	5	1	4	4	0	2	1	2	0	1	0	1	0	1	5	0	0	3	0	0	0	0	0	1	3	3	3	3	1	5	3	4	3	3	4	2	3	2	3	77	LG+C40+F+G
OG0000974	0	0	7	0	36	0	0	0	0	0	0	1	3	0	0	2	2	3	0	0	0	0	0	0	1	0	0	6	0	2	0	4	1	0	0	0	5	0	0	4	0	77	JTT+F+G4
OG0000975	0	0	0	0	0	0	0	0	0	0	0	0	0	0	77	0	0	0	0	0	0	0	0	0	0	0	0	0	0	0	0	0	0	0	0	0	0	0	0	0	0	77	JTT+F+R5
OG0000976	2	5	1	4	1	1	2	1	2	2	1	1	3	1	1	1	1	1	14	0	1	0	1	2	1	2	2	0	1	1	2	3	1	2	1	1	5	1	1	2	1	76	LG+C40+F+G
OG0000977	2	5	1	1	4	1	1	2	3	1	1	2	1	2	2	1	2	4	2	1	7	2	1	2	1	1	1	3	2	1	1	2	1	1	1	2	2	1	1	2	2	76	LG+C20+F+G
OG0000978	1	1	2	2	3	1	1	1	1	1	3	3	3	1	1	1	3	3	3	2	0	3	1	0	2	4	4	2	2	2	1	2	2	1	4	2	2	1	1	2	1	76	LG+C30+F+G
OG0000979	1	6	1	4	2	1	2	2	2	1	1	3	3	1	2	1	1	2	3	3	2	2	4	2	2	1	2	0	1	1	1	1	2	5	1	2	1	1	1	1	1	76	JTT+F+I+G4
OG0000980	2	0	2	0	3	5	1	3	0	3	1	4	7	0	1	1	5	1	0	1	0	0	0	0	1	3	0	2	3	2	1	2	3	0	6	1	2	4	2	2	2	76	LG+C10+F+G
OG0000981	1	6	1	1	2	1	2	1	6	1	2	1	1	3	2	1	2	2	7	3	1	1	3	1	1	2	1	2	2	1	1	2	1	2	1	1	1	1	1	1	3	76	JTT+F+G4
OG0000982	5	0	0	0	1	2	11	6	0	0	0	4	3	0	0	7	0	0	3	1	0	0	0	1	0	0	0	3	1	0	10	0	5	6	2	0	0	0	4	0	1	76	LG4M
OG0000983	3	4	1	3	2	1	1	1	0	1	1	2	1	1	1	3	1	3	7	1	2	5	1	1	1	1	2	2	2	1	2	2	5	2	1	2	1	1	1	1	2	76	JTT+F+I+G4
OG0000984	3	1	3	1	3	1	3	3	3	2	1	2	1	1	1	1	2	1	3	2	2	1	1	1	1	1	1	3	2	1	3	3	3	3	1	1	1	3	2	2	2	76	LG+C10+F+G
OG0000985	2	1	1	2	1	1	2	2	4	1	2	2	2	4	2	1	1	2	5	1	1	2	2	1	2	1	2	2	1	1	1	2	2	2	5	3	1	1	2	1	2	76	LG+C40+F+G
OG0000986	2	0	0	1	1	2	8	5	0	0	0	1	7	0	0	6	3	2	7	1	0	0	0	3	0	0	0	5	0	0	6	0	1	6	2	0	0	0	3	0	4	76	LG4M
OG0000987	1	4	1	1	2	1	1	1	5	1	2	1	1	3	1	1	1	3	5	1	3	4	4	1	2	2	1	1	1	1	1	6	1	1	2	1	1	1	1	3	1	76	JTT+F+I+G4
OG0000988	2	1	2	2	1	1	2	2	2	2	1	2	2	2	2	2	2	2	3	2	1	0	1	2	2	2	2	4	3	2	2	3	2	2	0	1	3	2	2	2	1	76	LG+C20+F+G
OG0000989	1	2	1	1	3	2	2	1	2	1	4	3	1	2	3	1	3	5	5	1	3	2	3	1	1	0	2	2	1	2	1	1	1	1	2	2	1	1	2	2	1	76	JTT+F+I+G4
OG0000990	2	2	3	1	2	2	2	2	2	2	1	2	2	1	0	1	2	2	5	1	2	1	0	2	3	2	2	0	2	3	3	3	2	2	1	0	3	2	2	3	1	76	LG+C30+F+G
OG0000991	2	3	3	2	1	2	2	3	2	2	2	2	2	3	0	2	2	2	2	1	2	2	2	1	2	2	1	1	1	4	1	3	1	3	2	2	2	2	0	1	1	76	C60
OG0000992	2	2	2	1	3	2	2	2	2	2	2	2	1	4	1	2	1	0	1	1	0	1	1	2	1	2	2	6	1	4	2	1	2	2	2	2	1	2	2	3	2	76	LG+C20+F+G
OG0000993	1	6	1	1	2	1	2	1	1	1	3	1	1	4	2	1	1	2	9	2	1	1	3	1	2	1	1	1	1	4	1	5	1	1	1	2	1	1	1	2	1	76	LG+C40+F+G
OG0000994	2	1	1	5	0	1	2	3	3	2	1	2	5	1	3	4	2	2	5	1	1	3	1	1	1	2	0	2	3	1	1	1	3	1	1	2	1	1	1	2	1	76	JTT+F+G4
OG0000995	2	3	1	1	2	3	3	3	4	3	1	1	1	1	2	2	1	1	2	2	2	1	2	3	4	1	1	0	1	0	3	0	2	4	1	1	1	3	3	1	3	76	LG+C20+F+G
OG0000996	2	4	1	1	4	1	1	2	2	1	1	1	1	3	3	1	3	0	5	1	1	5	4	1	3	2	2	2	1	1	1	1	2	1	1	3	1	2	1	2	1	76	JTT+F+R3
OG0000997	2	0	0	0	0	10	8	6	3	14	0	0	0	1	0	0	0	0	0	0	0	0	0	3	0	0	0	0	0	0	6	0	2	5	0	0	0	7	5	0	4	76	JTT+F+I+G4
OG0000998	2	3	1	1	5	2	2	2	2	2	2	3	1	1	1	1	2	1	5	4	3	1	1	2	1	2	1	3	1	1	2	1	2	2	1	1	1	2	2	1	2	76	LG+C20+F+G
OG0000999	1	4	1	2	2	2	2	2	2	3	4	3	1	1	1	2	1	0	3	2	1	0	1	1	1	4	0	1	4	1	3	1	2	3	3	3	1	2	1	1	2	75	JTT+F+G4
OG0001000	3	3	1	3	2	1	1	1	2	1	3	1	1	5	2	1	1	1	7	1	4	0	5	1	2	3	1	2	1	1	1	2	1	2	2	2	1	1	1	1	1	76	LG+C20+F+G
OG0001001	1	1	2	4	1	1	2	2	3	3	1	1	3	2	2	1	1	2	3	1	1	1	2	3	2	1	3	0	1	2	3	2	2	2	2	3	1	2	2	1	3	76	JTT+F+I+G4
OG0001002	2	2	2	2	2	1	2	2	2	2	2	2	2	2	2	2	2	2	2	2	2	2	2	2	1	2	1	1	2	1	2	2	2	2	2	2	2	2	1	2	2	76	LG4M
OG0001003	1	3	1	2	2	1	1	2	2	2	1	4	1	1	2	3	1	1	4	1	2	2	3	1	2	3	0	4	2	2	1	1	2	1	4	3	2	1	1	2	1	76	LG+C40+F+G
OG0001004	1	0	1	1	1	1	4	1	1	3	1	2	1	2	3	1	1	3	5	5	1	2	1	2	2	1	2	2	2	1	1	2	1	5	3	3	1	1	1	1	3	76	LG+C20+F+G
OG0001005	2	8	1	1	2	1	1	1	4	1	0	1	2	3	2	1	1	3	4	2	2	2	3	1	1	1	1	2	4	1	1	1	2	1	4	3	1	1	1	1	1	76	LG+C20+F+G
OG0001006	2	2	1	1	1	2	1	1	2	1	5	1	1	3	3	5	1	2	5	1	0	4	3	1	1	1	1	4	4	3	1	1	2	1	1	2	1	1	1	1	1	76	JTT+F+I+G4
OG0001007	1	2	1	2	2	1	1	1	0	1	2	2	1	3	5	2	1	2	5	1	1	2	1	1	1	2	1	4	2	1	1	1	4	1	7	4	1	1	1	1	2	76	LG+C20+F+G
OG0001008	1	4	3	1	2	1	1	1	1	1	3	1	1	1	2	1	2	2	5	1	4	3	2	1	1	1	1	2	1	3	1	5	1	1	1	1	8	1	1	1	1	76	LG+C10+F+G
OG0001009	2	2	2	2	3	2	2	2	2	2	1	1	4	1	1	2	2	1	3	2	2	3	0	2	1	2	2	1	2	2	1	3	2	2	2	2	2	2	2	0	2	76	LG+C20+F+G
OG0001010	1	1	2	4	1	0	2	1	3	5	4	1	1	3	2	3	1	3	4	2	0	2	0	0	2	2	2	3	2	1	2	1	4	1	3	3	1	1	0	1	1	76	LG+C20+F+G
OG0001011	0	0	2	2	3	3	3	3	3	3	2	4	0	0	1	5	3	1	6	3	0	0	0	0	1	0	0	2	0	3	3	3	3	3	0	0	3	3	2	1	2	76	LG+C20+F+G
OG0001012	4	3	1	3	2	1	1	1	3	1	3	2	2	3	3	1	1	2	4	1	1	2	3	1	1	0	1	0	2	2	1	1	5	1	2	2	2	1	1	1	2	74	JTT+F+I+G4
OG0001013	5	1	1	4	1	1	1	2	1	1	3	1	1	1	0	1	1	2	6	1	2	1	4	5	2	1	1	4	1	1	1	0	2	1	2	1	1	2	1	3	4	75	LG+C40+F+G
OG0001014	2	5	1	1	1	1	4	3	0	2	1	1	4	1	4	4	1	1	2	3	0	1	2	0	2	3	2	1	1	1	3	1	1	3	2	4	1	2	1	1	1	75	LG+C20+F+G
OG0001015	1	1	4	2	5	1	1	1	1	1	1	1	2	1	4	2	5	1	4	2	1	2	5	1	2	0	1	0	1	1	1	2	1	1	1	0	6	1	1	5	1	75	LG+C30+F+G
OG0001016	2	2	4	1	3	2	2	1	3	2	2	2	1	1	2	1	2	1	5	2	1	2	2	2	2	1	2	3	1	2	2	1	2	2	1	1	2	1	2	1	1	75	LG+C20+F+G
OG0001017	2	0	1	2	1	1	1	1	3	1	2	1	1	3	3	1	1	3	8	3	1	5	3	1	1	2	1	1	6	1	1	1	2	1	1	2	1	1	1	2	1	75	LG+C20+F+G
OG0001018	1	8	2	1	1	2	3	1	1	1	3	1	2	1	1	1	1	2	3	1	4	4	4	1	3	3	1	0	2	1	1	1	1	1	2	2	1	1	2	1	2	75	LG+C40+F+G
OG0001019	1	6	1	1	2	1	1	1	3	1	3	1	3	4	3	4	1	1	6	1	0	1	1	1	2	2	1	1	3	1	1	2	2	1	1	5	1	1	1	1	1	75	LG+C40+F+G
OG0001020	1	1	1	1	1	1	1	1	3	4	1	1	2	2	4	1	1	3	7	2	1	2	2	1	3	1	2	2	1	2	1	1	2	2	3	3	1	2	2	1	1	75	LG+C20+F+G
OG0001021	1	8	1	1	3	1	1	1	2	2	3	1	1	3	1	1	3	2	5	2	3	4	4	1	1	1	1	3	1	1	1	2	1	1	1	1	1	1	1	1	1	75	JTT+F+I+G4
OG0001022	1	3	1	2	1	1	2	1	1	2	3	1	1	2	1	4	1	2	15	0	2	1	4	1	2	2	2	0	2	1	1	2	2	2	0	1	1	1	1	1	1	75	JTT+F+G4
OG0001023	1	4	1	3	2	1	1	1	4	1	5	1	1	3	2	1	2	1	5	1	1	3	3	1	2	2	1	3	1	1	1	3	1	1	1	4	1	1	1	1	1	75	LG+C20+F+G
OG0001024	1	2	2	2	2	2	2	2	2	2	2	2	1	2	2	1	2	2	3	1	2	1	1	1	2	2	2	2	2	2	2	2	2	2	2	2	2	2	2	1	2	75	LG+C20+F+G
OG0001025	2	3	1	4	1	1	2	3	2	1	4	2	1	2	2	1	1	3	4	2	2	2	1	2	2	3	2	2	3	2	1	1	1	2	1	1	1	1	1	1	1	75	LG+C30+F+G
OG0001026	1	3	1	2	4	1	1	0	1	0	4	1	9	2	1	2	2	3	6	2	3	1	1	0	0	1	1	0	2	1	1	7	1	1	1	1	3	0	1	2	1	75	LG+C20+F+G
OG0001027	1	4	1	3	1	1	1	2	3	2	1	1	1	4	1	1	1	1	6	0	2	5	4	1	2	3	3	3	1	1	1	1	2	1	1	3	1	1	1	1	1	75	LG+C20+F+G
OG0001028	1	5	1	1	2	1	1	1	5	1	1	2	1	2	3	1	1	2	8	1	0	2	3	1	2	5	1	0	2	1	1	2	1	1	1	5	1	1	1	2	1	75	JTT+F+I+G4
OG0001029	1	9	1	1	2	1	1	1	3	1	2	1	1	4	2	2	1	0	9	1	1	4	5	1	2	1	2	2	1	0	1	1	1	1	0	1	2	1	1	2	1	75	LG+C20+F+G
OG0001030	1	1	1	2	2	2	1	1	2	1	2	1	6	3	1	2	1	0	9	2	0	1	0	1	1	5	1	3	3	1	1	1	2	1	5	3	1	1	1	1	1	75	LG+C20+F+G
OG0001031	2	2	6	1	1	1	1	1	3	2	2	2	1	1	3	2	2	1	5	2	0	2	0	1	1	3	1	5	2	3	2	1	1	1	3	2	1	1	1	1	2	75	JTT+F+I+G4
OG0001032	1	2	2	4	2	1	1	2	3	1	0	1	1	1	2	1	1	3	6	2	0	2	1	4	1	4	0	2	2	1	1	1	4	1	2	4	1	1	1	2	3	75	LG+C20+F+G
OG0001033	2	4	2	0	2	2	2	2	2	2	2	2	1	2	0	2	2	2	3	2	0	2	2	2	2	2	2	2	2	2	2	2	2	2	2	2	0	2	2	2	1	75	LG+C10+F+G
OG0001034	3	0	7	1	1	1	1	1	1	2	1	4	1	0	1	1	1	2	2	2	7	1	2	2	2	1	2	4	1	1	1	2	1	1	1	2	1	1	1	6	2	75	LG+C20+F+G
OG0001035	1	0	0	0	1	3	10	7	0	6	0	2	2	0	0	4	0	0	0	4	0	0	0	0	0	0	0	2	3	0	4	1	1	10	3	1	1	4	4	0	1	75	LG4X
OG0001036	2	1	1	0	1	1	2	2	0	4	0	6	1	0	1	0	5	1	3	2	0	0	0	4	0	2	1	5	1	4	3	1	5	2	2	3	1	1	2	2	3	75	JTT+F+R3
OG0001037	2	0	3	2	2	2	2	2	3	2	3	3	3	2	1	1	1	0	2	1	1	0	2	2	2	0	1	0	2	2	1	2	2	2	1	3	5	2	2	4	2	75	LG+C20+F+G
OG0001038	2	8	2	1	1	1	1	1	3	1	2	1	1	2	3	5	1	2	4	3	2	2	1	1	1	3	0	1	1	3	1	1	3	1	3	1	1	1	1	1	1	75	LG+C20+F+G
OG0001039	1	4	1	2	8	1	1	1	4	1	1	2	1	2	2	2	1	4	3	1	1	3	2	1	1	1	3	2	3	1	1	2	1	1	1	3	1	1	1	1	1	75	LG+C20+F+G
OG0001040	1	5	1	3	1	1	2	1	2	1	2	1	1	2	3	1	1	3	9	2	1	3	3	1	3	2	0	2	1	1	2	1	3	1	1	1	1	1	1	2	1	75	LG+C20+F+G
OG0001041	1	4	2	1	3	1	1	1	2	1	2	1	1	1	1	1	1	2	6	1	2	6	2	1	2	4	1	3	3	1	1	1	1	1	1	3	3	1	1	2	1	75	LG+C20+F+G
OG0001042	1	6	1	1	2	1	2	1	3	1	2	1	1	2	3	3	1	2	8	3	1	3	2	1	1	1	3	1	1	1	2	1	1	2	1	3	1	1	1	1	1	75	LG+C50+F+G
OG0001043	0	0	2	0	1	2	0	0	0	0	0	1	7	1	2	4	1	7	7	0	1	0	0	0	0	0	0	1	5	0	0	1	1	1	9	1	20	0	0	0	0	75	LG+C30+F+G
OG0001044	1	6	1	2	2	1	2	1	0	1	1	4	1	0	2	1	2	1	6	2	0	1	1	2	2	2	1	2	3	1	3	1	1	4	4	2	1	1	1	1	3	74	LG+C20+F+G
OG0001045	2	1	2	1	2	3	1	2	3	2	1	3	2	1	1	2	2	1	4	1	1	1	2	2	2	2	2	1	2	2	2	1	2	1	2	3	2	2	2	1	2	74	LG+C10+F+G
OG0001046	1	7	1	2	2	2	1	1	4	1	1	2	1	2	2	1	1	2	6	1	1	3	4	1	1	2	3	2	2	1	1	1	1	1	2	3	1	1	1	0	1	74	JTT+F+I+G4
OG0001047	3	0	0	0	0	10	15	2	0	9	0	4	5	0	0	0	0	0	1	0	0	0	0	0	0	0	0	0	2	0	3	10	0	3	0	0	2	0	3	0	2	74	LG+C30+F+G
OG0001048	1	6	1	1	1	1	1	1	5	1	3	1	1	3	1	1	1	3	6	1	4	5	2	1	2	1	0	2	4	1	1	1	1	1	1	1	2	1	1	1	1	74	LG+C20+F+G
OG0001049	2	4	1	1	4	1	2	3	1	2	2	1	1	2	2	1	3	1	3	3	3	2	1	2	1	1	1	2	1	1	5	1	2	3	1	1	1	1	2	1	1	74	LG+C30+F+G
OG0001050	2	1	1	4	1	1	2	1	1	1	4	1	6	3	1	1	1	3	5	1	1	3	3	1	1	1	4	1	1	1	1	3	1	1	1	5	1	1	1	0	1	74	LG+C20+F+G
OG0001051	2	1	3	1	1	2	2	2	2	2	1	2	1	2	1	0	3	1	5	2	1	2	1	2	3	1	2	0	0	2	2	3	2	2	1	1	5	2	1	3	2	74	LG4X
OG0001052	2	0	2	0	1	5	0	5	0	4	0	3	5	2	3	2	1	1	3	1	1	0	1	0	1	2	0	1	3	1	3	1	5	0	2	0	1	4	3	3	2	74	LG+C20+F+G
OG0001053	3	2	2	2	1	1	3	3	5	2	0	1	3	2	4	5	3	0	3	3	1	2	1	1	1	0	1	3	1	1	1	1	1	1	2	3	1	1	1	1	1	74	LG+C20+F+G
OG0001054	2	2	2	3	1	1	2	1	0	1	1	0	4	2	2	2	1	1	6	2	1	5	0	3	3	1	2	2	1	0	2	1	5	2	1	1	1	1	1	2	3	74	JTT+F+I+G4
OG0001055	1	7	3	1	2	1	1	1	2	1	2	1	1	2	4	1	1	3	4	2	0	2	2	1	3	2	0	2	6	1	1	1	1	1	3	2	1	1	1	1	1	74	LG+C20+F+G
OG0001056	1	0	1	1	2	3	3	2	1	3	0	0	1	0	3	1	5	1	7	3	3	3	2	1	3	1	2	2	0	1	1	1	2	5	3	1	1	1	1	1	1	74	LG+C20+F+G
OG0001057	2	0	0	0	0	0	7	7	5	7	0	0	0	0	0	0	0	0	0	1	0	0	0	1	1	0	0	0	0	2	7	2	6	6	1	0	3	6	7	0	3	74	LG+C40+F+G
OG0001058	1	0	1	0	2	5	5	1	1	1	4	1	7	3	3	1	2	2	6	2	4	0	1	1	1	0	0	0	2	1	1	1	2	5	2	1	0	1	1	1	1	74	JTT+F+R4
OG0001059	2	2	2	0	1	1	2	2	2	2	2	2	1	2	3	2	2	0	2	2	3	2	2	2	2	2	2	2	2	2	1	2	1	2	2	2	2	2	2	2	1	74	LG+C10+F+G
OG0001060	2	2	1	1	1	2	2	2	3	2	2	2	2	2	1	2	1	2	2	2	2	2	3	2	1	2	2	1	1	2	2	2	2	2	2	2	2	1	2	1	2	74	LG4X
OG0001061	1	4	1	2	1	1	1	1	0	2	2	1	4	3	4	1	1	2	4	2	0	4	1	1	2	2	1	3	4	1	2	2	1	2	2	0	2	2	1	2	1	74	LG+C20+F+G
OG0001062	3	0	1	3	1	1	4	2	1	1	2	1	1	2	2	1	1	1	4	2	0	2	0	0	2	4	1	2	3	1	4	1	4	3	5	2	1	0	2	1	2	74	LG+C30+F+G
OG0001063	2	4	1	2	2	1	4	1	2	1	1	1	3	3	1	2	1	1	9	2	2	2	2	2	1	2	1	1	2	1	1	1	1	1	4	1	1	1	1	1	1	74	LG+C20+F+G
OG0001064	2	1	2	1	0	1	2	2	3	2	2	1	2	1	3	8	2	1	2	1	1	2	2	1	1	1	1	1	3	1	2	2	2	3	2	1	1	3	3	1	1	74	C60
OG0001065	1	7	2	1	1	1	1	2	0	1	2	1	1	3	4	1	1	0	8	1	1	3	1	1	3	1	0	2	0	1	3	1	2	1	5	4	2	1	0	1	2	74	LG+C20+F+G
OG0001066	1	6	3	5	1	1	1	1	2	1	3	1	1	3	2	1	1	2	6	2	1	2	3	1	3	1	1	2	1	3	1	1	2	1	1	1	1	1	1	1	1	74	JTT+F+I+G4
OG0001067	1	6	1	3	1	2	3	1	1	1	1	1	3	3	2	0	3	2	6	1	1	1	3	1	3	4	1	0	1	2	1	2	1	2	1	3	1	1	1	1	1	74	LG+C10+F+G
OG0001068	1	4	1	2	2	1	1	2	1	2	2	2	1	4	1	1	2	2	6	2	2	1	2	1	3	2	1	3	2	1	1	1	1	1	3	1	1	1	1	4	1	74	JTT+F+I+G4
OG0001069	1	4	1	1	2	1	1	2	5	1	1	3	1	3	2	1	2	2	5	3	4	2	2	1	1	1	2	2	1	1	2	2	2	1	1	1	1	1	1	2	1	74	LG+C40+F+G
OG0001070	1	8	1	1	1	1	1	2	2	1	4	1	1	2	2	1	1	1	9	2	1	2	3	1	1	1	1	2	1	1	1	1	1	1	1	5	2	1	1	2	1	74	LG+C20+F+G
OG0001071	1	4	1	1	1	2	2	2	3	2	1	2	1	2	1	2	1	3	8	1	1	4	2	1	1	2	1	0	1	1	2	1	1	2	3	3	1	1	1	3	1	74	JTT+F+I+G4
OG0001072	1	3	4	1	1	1	1	1	1	1	1	1	1	2	1	1	1	1	12	1	2	1	1	1	3	1	1	2	1	1	1	2	1	1	1	1	6	1	1	7	1	74	LG+C20+F+G
OG0001073	3	2	1	2	1	2	5	5	0	2	0	3	1	1	0	2	1	1	3	2	0	3	0	1	2	4	1	0	1	1	4	1	5	2	1	2	1	1	3	2	1	73	JTT+F+I+G4
OG0001074	2	0	6	0	1	0	2	3	0	4	1	0	0	0	4	0	1	0	7	1	0	0	0	2	1	1	0	0	0	0	0	1	1	0	2	2	11	2	4	10	4	73	LG+C20+F+G
OG0001075	2	0	0	0	0	10	8	8	11	7	0	1	0	0	0	0	0	0	0	0	0	0	0	5	0	0	0	0	0	0	4	0	2	3	0	0	0	7	3	1	1	73	C60
OG0001076	3	3	1	2	2	1	1	2	0	1	2	6	2	4	2	4	1	1	4	0	1	1	4	3	0	1	0	1	2	1	2	2	2	1	1	2	0	2	1	1	3	73	LG+C20+F+G
OG0001077	5	2	2	2	1	1	1	1	0	3	0	3	4	1	0	6	1	0	0	0	1	2	0	5	1	3	0	2	3	1	4	0	2	1	3	2	0	2	1	0	7	73	JTT+F+G4
OG0001078	2	3	1	2	2	2	3	2	2	2	0	3	1	2	0	3	2	1	3	2	0	0	0	1	3	2	0	2	3	2	1	2	2	2	2	2	2	1	1	3	4	73	LG+C20+F+G
OG0001079	4	1	1	1	1	1	2	4	1	1	0	2	1	2	3	3	3	0	6	2	0	0	0	2	1	3	0	0	5	1	1	2	3	1	4	5	1	1	1	1	2	73	JTT+F+I+G4
OG0001080	2	3	1	1	1	1	1	1	2	1	1	1	3	2	1	1	1	2	6	2	1	1	5	2	2	3	1	4	6	1	1	1	1	1	1	4	1	1	0	1	1	73	LG+C20+F+G
OG0001081	2	2	1	1	1	1	5	2	0	2	1	1	4	1	0	3	2	1	3	1	1	2	1	4	3	1	2	1	2	1	3	1	3	4	1	1	1	2	1	2	2	73	LG+C20+F+G
OG0001082	2	4	1	3	1	1	1	2	0	2	2	3	1	2	2	3	2	1	2	2	1	4	2	0	1	1	1	6	1	1	5	1	2	3	1	1	1	1	1	1	1	73	LG+C20+F+G
OG0001083	2	3	1	1	1	2	1	1	3	1	4	1	1	4	2	1	1	1	6	1	3	1	4	1	4	1	2	2	1	2	1	2	1	1	2	1	1	1	1	2	1	73	LG+C20+F+G
OG0001084	3	2	3	2	2	2	2	2	2	2	0	2	3	1	1	3	3	1	3	2	0	1	1	1	2	2	1	2	2	2	2	2	1	2	1	1	1	2	2	2	2	73	JTT+F+G4
OG0001085	1	3	2	2	2	1	1	1	1	1	2	2	2	2	2	1	2	2	5	2	2	2	2	1	3	2	2	3	2	2	1	2	1	2	1	2	2	1	1	1	1	73	LG+C20+F+G
OG0001086	2	1	2	1	5	2	2	2	4	2	1	2	1	1	1	1	3	1	3	2	1	1	2	1	2	1	1	1	1	3	2	1	2	2	1	1	3	2	2	2	2	73	LG+C20+F+G
OG0001087	2	0	1	1	1	1	2	0	0	1	6	1	1	4	2	1	1	3	6	2	1	1	2	4	3	1	3	6	1	1	1	1	1	3	2	3	0	1	0	1	1	73	LG+C30+F+G
OG0001088	1	8	1	1	1	1	2	1	2	2	2	1	1	1	1	1	2	1	4	1	1	6	1	1	3	2	1	5	4	1	1	1	1	1	2	2	1	1	1	1	1	73	LG+C20+F+G
OG0001089	2	0	2	1	2	2	2	2	1	2	2	3	1	1	2	2	1	1	3	2	2	0	0	2	1	2	1	5	1	3	2	3	2	2	1	2	2	2	2	2	2	73	LG+C10+F+G
OG0001090	1	1	3	2	1	1	1	1	3	1	2	1	1	3	1	2	1	5	5	2	2	0	3	1	1	4	2	3	2	3	1	1	1	1	4	1	1	1	1	1	1	73	LG+C20+F+G
OG0001091	1	1	2	4	2	1	1	1	0	1	1	3	1	3	1	4	1	3	3	1	1	3	4	1	2	1	1	2	1	2	1	1	2	1	1	2	1	1	1	7	2	73	JTT+F+I+G4
OG0001092	1	1	1	2	1	1	1	3	3	2	2	2	1	1	1	5	1	1	2	1	1	0	3	1	1	6	1	1	5	1	1	1	1	1	4	5	2	1	1	1	2	73	LG+C20+F+G
OG0001093	3	1	1	1	1	2	4	1	0	3	0	4	0	0	4	0	2	1	3	1	0	0	0	6	0	0	2	0	2	1	2	1	2	4	1	2	2	2	3	6	5	73	JTT+F+G4
OG0001094	1	5	1	1	2	1	1	2	3	1	1	2	1	3	2	2	2	3	5	2	2	3	5	1	2	1	2	0	1	1	2	1	2	2	1	1	1	1	1	1	1	73	LG+C20+F+G
OG0001095	2	3	1	2	1	1	6	1	2	3	0	1	3	2	1	4	1	1	2	1	2	0	1	3	1	3	0	2	3	1	3	1	2	1	4	2	1	1	1	1	2	73	JTT+F+I+G4
OG0001096	2	4	1	2	1	1	1	2	2	2	0	2	5	1	3	1	1	2	1	2	1	0	0	2	1	2	2	1	3	1	3	2	3	1	3	4	1	1	1	1	4	73	LG+C20+F+G
OG0001097	2	1	5	2	2	3	2	2	2	2	1	1	1	2	1	1	1	1	4	1	2	1	1	3	2	1	0	2	1	3	2	1	3	3	1	1	1	2	1	2	3	73	JTT+F+I+G4
OG0001098	1	0	1	4	1	1	3	2	1	2	2	1	1	3	3	1	1	1	8	3	1	0	2	1	2	6	2	2	0	1	1	2	1	1	2	4	1	1	1	1	1	73	LG+C40+F+G
OG0001099	1	1	1	1	1	1	2	2	4	1	4	3	1	2	1	1	1	3	4	2	2	3	5	1	3	3	1	1	1	1	1	1	2	1	2	2	1	1	1	2	1	73	JTT+F+I+G4
OG0001100	1	0	1	2	1	1	1	2	1	2	3	2	2	1	1	3	1	3	2	2	1	4	3	1	1	0	2	1	1	1	1	2	3	3	5	2	1	2	4	0	3	73	LG+C20+F+G
OG0001101	1	4	1	4	1	2	3	1	2	2	2	1	1	2	1	2	1	3	3	2	1	1	1	1	1	1	2	1	2	2	2	1	3	3	1	2	1	2	2	2	2	73	LG+C40+F+G
OG0001102	1	3	1	2	0	2	1	1	2	1	1	2	1	1	4	1	1	4	5	1	4	8	8	1	2	1	1	1	1	1	1	1	1	2	0	1	1	1	0	1	1	73	LG+C20+F+G
OG0001103	2	1	1	1	3	2	2	2	2	2	1	2	1	4	2	1	2	2	4	1	1	2	1	2	2	1	2	1	1	2	2	3	2	2	1	1	2	2	2	1	2	73	LG+C20+F+G
OG0001104	1	0	1	1	1	2	6	1	1	1	4	1	1	3	1	1	2	3	3	1	3	0	1	1	1	5	1	2	2	1	1	1	2	3	3	5	1	1	2	1	1	73	JTT+F+G4
OG0001105	2	1	1	2	2	2	2	2	2	2	2	2	3	2	1	1	2	2	3	2	2	1	1	2	1	1	1	0	1	3	2	2	2	2	2	2	2	2	2	2	2	73	LG+C20+F+G
OG0001106	1	0	1	5	1	1	2	3	0	1	1	1	6	3	3	2	1	1	6	2	1	0	0	3	2	1	4	1	2	1	3	1	3	1	1	0	1	1	1	2	3	73	LG+C20+F+G
OG0001107	1	4	3	1	1	1	1	1	1	1	3	1	1	2	4	2	1	4	5	4	2	5	3	1	2	2	1	1	2	1	1	1	1	1	1	1	1	1	1	1	1	73	LG+C40+F+G
OG0001108	1	7	2	1	1	1	1	3	4	1	2	1	3	4	3	2	1	1	4	1	0	3	0	2	1	2	2	1	0	1	1	1	1	1	2	1	4	1	1	2	2	73	LG+C20+F+G
OG0001109	1	5	1	3	2	1	1	1	2	2	3	1	4	3	1	1	1	5	4	1	0	2	2	1	3	3	0	0	1	1	1	1	3	2	2	3	1	1	1	1	1	73	JTT+F+I+G4
OG0001110	1	1	1	3	2	2	2	2	2	2	1	1	1	2	2	2	1	2	3	1	1	3	3	1	3	1	1	1	2	2	2	1	2	2	2	1	1	1	3	2	3	72	LG+C20+F+G
OG0001111	1	0	3	0	4	3	1	2	0	2	2	1	0	0	0	1	5	0	0	2	0	0	0	0	0	2	1	2	4	6	3	3	2	2	3	1	3	3	3	5	2	72	JTT+F+I+G4
OG0001112	2	3	1	1	2	1	1	2	5	1	3	1	1	3	2	1	2	1	5	2	3	2	4	1	1	1	1	1	1	1	1	1	4	1	2	1	0	2	1	2	1	72	JTT+F+I+G4
OG0001113	4	4	2	1	3	1	4	1	0	1	2	5	3	0	2	2	1	0	2	2	0	1	1	3	2	4	0	3	1	2	1	1	1	1	1	3	1	1	1	1	3	72	JTT+F+I+G4
OG0001114	1	7	2	2	2	1	1	1	3	1	3	1	1	3	1	1	1	1	4	3	1	1	4	1	2	1	1	2	1	1	1	1	1	1	2	5	2	1	1	1	1	72	LG+C40+F+G
OG0001115	1	1	2	2	1	1	1	1	4	1	1	3	1	1	2	1	1	1	6	1	1	6	4	1	4	2	1	2	4	2	1	1	1	1	1	1	1	1	1	2	1	72	LG+C60+F+G
OG0001116	3	1	2	1	3	1	2	2	1	2	1	2	2	2	0	2	2	2	6	2	1	1	0	2	1	1	0	0	1	3	2	3	2	3	1	2	2	2	2	3	1	72	JTT+F+R4
OG0001117	1	4	1	3	1	1	3	1	0	1	1	5	2	0	2	0	2	2	3	2	2	5	2	2	2	2	1	2	1	2	1	1	2	2	2	2	1	1	1	1	2	72	JTT+F+I+G4
OG0001118	1	5	1	4	2	2	2	1	4	2	1	3	1	1	3	1	1	1	4	2	1	2	3	1	0	3	0	0	1	1	1	1	4	1	1	4	1	1	1	2	1	72	JTT+F+I+G4
OG0001119	3	0	1	3	1	1	1	5	0	4	0	1	8	1	1	6	1	0	3	2	1	6	0	0	0	3	1	1	2	1	0	1	4	3	1	0	1	1	1	1	2	72	JTT+F+I+G4
OG0001120	2	7	2	1	2	1	2	1	3	1	2	1	1	2	3	1	1	2	4	2	2	0	2	1	2	1	1	2	3	1	1	1	1	1	2	4	1	1	1	2	1	72	LG+C30+F+G
OG0001121	1	4	1	1	4	2	1	1	2	1	3	3	1	2	2	2	4	2	3	2	1	2	2	1	2	1	1	2	1	2	1	2	2	1	2	0	2	1	1	2	1	72	LG+C10+F+G
OG0001122	2	1	2	2	3	2	2	2	0	2	1	4	1	2	0	3	2	3	1	2	1	1	1	2	2	2	1	1	3	2	1	3	1	3	2	1	1	2	1	2	2	72	LG+C10+F+G
OG0001123	1	2	2	1	2	2	2	0	2	1	3	2	2	4	2	1	1	4	3	2	1	1	2	1	3	2	2	2	2	2	1	2	1	2	0	1	1	1	2	2	2	72	JTT+F+G4
OG0001124	1	3	5	1	1	1	1	1	3	1	1	2	1	1	5	1	2	1	5	1	1	4	2	1	1	1	1	1	3	1	1	2	3	1	2	4	1	1	1	1	1	72	LG+C40+F+G
OG0001125	1	6	1	2	1	2	1	2	3	1	1	2	3	3	1	1	2	1	3	2	1	6	3	1	1	2	1	1	2	1	1	1	1	1	2	2	1	1	1	1	2	72	LG+C20+F+G
OG0001126	2	3	2	2	1	1	1	1	2	1	1	2	3	3	1	2	1	2	4	1	3	1	3	2	2	1	1	3	2	1	1	4	2	1	2	2	1	1	1	1	1	72	JTT+F+I+G4
OG0001127	1	4	1	1	1	1	1	1	0	1	4	2	1	3	4	2	1	3	5	2	3	4	2	1	1	1	1	4	1	1	1	1	1	1	1	3	2	1	1	1	1	72	LG+C20+F+G
OG0001128	2	2	2	1	1	1	1	1	2	2	2	2	2	2	2	3	2	2	3	0	2	2	2	1	2	2	2	1	2	2	2	1	2	2	2	2	3	1	1	2	1	72	LG4X
OG0001129	2	3	2	2	4	2	2	2	0	2	0	3	1	1	2	2	2	1	2	2	0	0	0	3	3	3	2	1	2	2	2	1	2	2	1	2	3	1	2	2	1	72	JTT+F+I+G4
OG0001130	2	0	0	0	1	3	1	8	1	14	0	0	0	0	0	0	0	0	0	0	0	0	0	0	0	0	0	0	2	2	3	2	5	0	0	0	0	7	12	9	0	72	LG+C10+F+G
OG0001131	1	2	1	1	1	1	1	1	3	2	3	1	1	3	1	1	2	4	4	1	2	4	3	1	1	2	1	5	1	1	1	2	1	1	3	2	1	1	1	2	1	72	JTT+F+I+G4
OG0001132	2	2	2	1	4	2	2	1	2	2	1	2	1	3	3	1	2	1	5	1	1	1	0	2	2	1	1	1	1	2	2	2	2	2	1	1	2	2	2	2	2	72	LG+C20+F+G
OG0001133	1	1	2	1	1	1	1	1	0	1	1	1	3	2	4	0	1	3	9	1	2	5	6	1	2	1	2	2	1	1	1	1	1	1	1	4	1	1	1	1	1	72	LG+C20+F+G
OG0001134	1	3	1	4	1	1	1	2	3	1	2	2	1	2	1	1	1	1	7	2	2	3	2	1	1	4	2	1	2	1	2	1	1	1	1	3	2	1	1	1	1	72	LG+C40+F+G
OG0001135	2	4	1	1	1	2	2	1	1	3	3	1	1	2	1	1	1	4	5	1	3	1	5	1	4	1	1	2	0	1	1	1	1	1	2	1	2	2	2	1	1	72	LG+C40+F+G
OG0001136	2	3	1	3	1	1	2	1	1	2	2	3	2	1	3	1	2	2	5	1	1	1	3	1	1	2	1	1	6	1	2	2	1	1	1	3	1	1	1	1	1	72	JTT+F+I+G4
OG0001137	1	2	3	1	1	1	4	1	2	1	3	1	1	3	3	2	2	2	4	2	2	1	1	1	3	1	3	0	1	1	1	2	1	3	2	0	1	1	2	3	2	72	LG+C30+F+G
OG0001138	1	2	1	4	1	1	1	1	2	1	1	1	1	2	2	1	1	1	2	1	5	5	6	1	2	1	2	3	1	1	1	1	1	1	6	2	1	1	1	1	1	72	C60
OG0001139	1	2	1	1	1	2	2	2	1	2	1	1	1	3	1	4	1	2	3	1	1	1	1	2	1	1	1	1	1	3	2	1	1	2	1	1	10	2	2	2	2	72	LG+C40+F+G
OG0001140	1	5	2	3	1	1	1	3	1	1	1	1	1	3	2	1	2	1	5	2	1	0	1	1	1	3	1	3	1	2	1	1	3	1	4	3	1	1	1	1	3	72	LG+C20+F+G
OG0001141	1	3	3	1	6	2	2	1	2	2	2	2	0	1	2	3	3	0	5	2	1	1	2	1	1	1	1	4	1	2	2	1	1	2	1	0	1	2	2	1	1	72	LG+C40+F+G
OG0001142	0	7	7	2	1	1	0	1	0	1	2	1	1	2	0	3	3	1	0	0	2	1	1	1	1	1	2	0	2	1	2	1	1	0	2	3	3	1	2	12	0	72	LG+C20+F+G
OG0001143	1	5	1	1	3	1	1	1	2	1	3	1	1	3	2	1	1	2	3	2	1	1	3	1	2	1	1	1	4	1	1	1	1	1	2	6	1	1	1	3	1	71	LG+C20+F+G
OG0001144	2	3	2	2	1	1	5	1	0	3	2	4	2	2	2	3	2	3	1	3	0	0	2	2	2	1	2	1	1	2	3	1	2	1	1	1	1	0	1	1	2	71	LG+C20+F+G
OG0001145	2	6	2	1	1	2	2	3	3	2	1	1	1	3	1	1	2	1	2	0	1	1	1	2	1	1	1	1	1	2	2	2	2	2	1	1	2	2	2	4	2	71	LG+C20+F+G
OG0001146	3	0	0	0	0	5	6	5	5	7	0	6	0	0	0	0	0	0	0	0	0	0	0	3	0	0	0	0	0	0	3	0	1	10	0	0	0	6	6	0	5	71	WAG+F+I+G4
OG0001147	2	2	1	1	0	3	3	2	3	3	1	2	1	1	1	1	1	2	2	2	2	2	2	2	1	1	1	2	1	3	2	2	2	4	0	0	1	3	3	0	3	71	LG+C30+F+G
OG0001148	2	8	1	1	2	1	1	1	2	1	2	1	1	3	0	1	1	2	6	1	1	4	3	1	2	3	1	2	1	2	1	1	1	1	1	2	1	1	1	2	1	71	JTT+F+R5
OG0001149	2	2	2	1	2	1	2	1	1	2	1	1	2	1	2	2	1	1	4	2	3	2	3	1	1	2	1	1	2	3	2	2	2	2	1	1	3	2	2	1	1	71	LG+C10+F+G
OG0001150	1	4	1	1	1	1	1	1	3	1	2	1	1	4	2	2	1	2	6	2	2	5	4	1	1	1	3	2	1	1	1	1	1	1	2	1	1	1	1	1	1	71	LG+C20+F+G
OG0001151	2	3	1	1	6	1	1	1	0	2	1	1	1	0	2	2	6	1	3	6	1	2	1	1	2	2	1	3	1	0	0	2	0	1	1	1	6	1	1	3	0	71	LG+C30+F+G
OG0001152	1	0	1	2	2	1	1	1	1	1	2	2	5	3	3	4	1	2	6	1	1	1	2	1	2	4	3	2	1	1	1	1	1	3	2	0	1	1	1	1	1	71	LG+C30+F+G
OG0001153	3	1	1	1	2	3	3	2	3	2	2	2	1	1	2	0	1	1	2	4	1	1	1	2	1	2	1	2	2	1	1	1	3	3	1	1	1	1	3	1	4	71	LG+C20+F+G
OG0001154	1	3	1	1	2	2	1	1	4	1	3	1	1	2	1	1	1	1	3	3	4	3	2	1	3	1	1	3	1	1	1	2	1	1	3	3	1	1	1	2	1	71	JTT+F+I+G4
OG0001155	2	1	2	1	2	1	2	1	3	1	1	1	1	3	2	1	2	2	6	2	2	5	0	1	2	3	2	0	5	1	1	3	1	1	0	0	1	2	2	1	1	71	LG+C20+F+G
OG0001156	2	1	1	1	2	1	2	2	2	2	1	2	2	3	1	2	2	1	2	1	1	1	1	1	2	2	1	1	2	2	3	2	1	2	2	2	2	2	2	2	4	71	LG+C40+F+G
OG0001157	3	10	1	1	1	2	2	3	2	2	0	1	1	0	1	1	0	1	1	2	1	2	1	2	2	1	0	0	1	1	1	4	2	5	1	2	1	0	4	1	4	71	LG4X
OG0001158	3	2	1	1	1	1	4	2	0	1	1	4	1	2	2	2	1	1	2	1	0	1	0	5	1	1	0	2	2	1	2	2	3	3	3	3	1	1	1	1	5	71	JTT+F+G4
OG0001159	3	2	1	2	1	1	2	4	0	3	0	6	1	2	2	2	1	0	2	2	0	1	1	2	1	4	1	0	5	1	1	1	2	2	2	1	1	1	1	4	2	71	JTT+F+I+G4
OG0001160	1	9	1	3	2	1	1	1	1	1	2	1	1	2	5	1	1	2	2	1	2	1	1	1	4	1	1	5	1	1	1	2	1	2	1	1	1	1	1	2	1	71	LG+C50+F+G
OG0001161	2	3	1	1	2	2	2	2	2	2	2	2	1	2	0	1	1	1	3	2	0	2	2	2	3	1	1	1	2	2	2	2	3	2	2	1	2	2	2	1	2	71	LG+C20+F+G
OG0001162	1	3	1	3	1	3	1	1	2	1	1	2	2	3	1	1	1	2	4	0	2	3	2	1	2	1	2	1	1	5	1	2	2	3	1	3	1	1	1	1	1	71	JTT+F+I+G4
OG0001163	1	3	1	3	1	2	2	1	4	2	3	1	2	3	4	1	1	3	2	1	1	2	4	1	1	1	2	3	1	1	1	1	1	3	1	1	1	1	1	1	1	71	LG+C20+F+G
OG0001164	1	2	4	2	1	1	3	1	2	1	2	1	1	2	2	1	2	1	3	2	1	5	4	1	4	1	2	1	1	1	1	1	1	1	3	2	1	1	1	2	1	71	LG+C20+F+G
OG0001165	1	5	1	4	2	1	1	1	2	1	1	1	1	2	3	1	1	3	4	1	2	5	4	1	1	1	1	1	2	1	2	1	4	1	1	1	1	1	1	1	1	71	LG+C30+F+G
OG0001166	1	2	3	1	2	1	1	1	0	0	1	1	1	2	3	1	1	3	2	2	3	3	2	2	3	2	2	2	2	3	1	2	1	2	2	2	2	1	2	2	1	71	C60
OG0001167	2	2	3	1	1	1	1	1	2	1	2	1	1	3	1	1	1	2	2	1	3	5	3	1	2	2	1	5	3	1	1	3	1	1	2	2	1	1	1	1	1	71	JTT+F+R4
OG0001168	1	2	2	2	2	1	1	1	3	1	2	1	1	4	1	3	1	1	5	0	0	4	2	1	2	1	4	5	2	1	1	1	1	1	3	2	1	1	1	1	1	71	LG+C20+F+G
OG0001169	1	1	2	1	2	2	3	2	2	2	1	2	2	1	2	2	2	1	3	1	1	1	1	2	2	1	1	1	1	2	2	2	2	3	2	1	2	2	3	1	3	71	LG4M
OG0001170	1	4	4	2	1	1	1	2	5	1	3	1	1	3	1	1	2	2	4	2	1	2	3	1	2	2	1	2	1	1	1	1	2	1	2	1	1	1	1	1	1	71	JTT+F+I+G4
OG0001171	1	6	1	1	2	1	1	1	1	2	3	1	2	2	1	1	1	1	5	2	1	3	3	1	1	2	2	3	1	1	1	3	1	1	4	2	1	1	1	1	1	71	LG+C20+F+G
OG0001172	1	4	2	1	1	1	3	1	1	1	2	1	1	3	2	2	1	2	5	2	2	5	5	1	1	1	1	3	1	1	1	1	1	1	2	1	1	1	1	2	1	71	LG+C20+F+G
OG0001173	1	3	1	1	1	1	4	1	1	2	1	1	1	6	2	1	1	3	2	2	1	4	2	1	3	1	1	2	3	2	1	4	1	1	1	1	1	1	1	2	1	71	LG+C20+F+G
OG0001174	2	4	2	1	1	1	1	1	1	1	4	1	1	2	1	1	1	1	3	1	2	3	4	2	3	1	2	3	2	1	1	2	2	1	2	3	1	1	1	2	1	71	JTT+F+I+G4
OG0001175	2	1	1	2	1	1	5	1	0	1	0	1	3	2	4	1	1	2	5	1	0	4	3	2	1	4	0	3	3	1	1	1	1	2	3	0	1	1	1	3	1	71	JTT+F+I+G4
OG0001176	1	2	5	2	1	1	1	3	5	1	1	1	1	2	3	1	2	1	2	1	2	5	4	1	1	1	2	1	1	1	2	1	3	1	0	2	1	1	1	1	2	71	JTT+F+I+G4
OG0001177	1	1	2	4	1	1	1	1	0	3	2	1	1	1	3	2	1	2	5	3	1	3	4	2	1	2	0	0	3	1	2	1	1	1	1	4	1	0	1	2	4	71	LG+C20+F+G
OG0001178	1	2	1	2	1	2	1	1	1	1	4	2	1	3	1	1	1	2	7	1	3	2	5	1	2	1	1	5	1	1	1	1	2	1	1	0	1	1	2	1	2	71	JTT+F+I+G4
OG0001179	1	3	2	2	1	3	1	1	3	7	1	1	2	3	2	5	1	1	2	2	1	1	0	2	1	1	0	2	3	1	1	1	2	1	2	1	1	1	1	1	3	71	JTT+F+G4
OG0001180	1	1	2	1	1	1	1	1	1	1	1	1	1	6	3	4	1	2	4	1	3	2	2	1	2	2	2	1	1	2	1	1	1	1	3	5	1	1	1	2	1	71	LG+C40+F+G
OG0001181	1	0	2	3	1	1	1	1	1	2	5	1	2	3	0	1	2	3	5	3	1	2	3	1	3	3	1	1	4	1	1	1	1	1	2	2	1	1	1	1	1	71	JTT+F+I+G4
OG0001182	1	3	1	3	1	1	1	1	3	2	3	1	1	4	3	1	1	3	7	1	4	4	1	1	1	1	1	1	2	1	1	1	1	1	1	1	1	1	1	2	1	71	JTT+F+I+G4
OG0001183	1	2	2	2	3	1	2	1	2	5	1	1	1	2	3	5	1	0	4	1	1	3	1	1	1	3	1	2	1	1	1	1	1	3	1	2	1	1	1	3	1	71	LG+C30+F+G
OG0001184	2	3	2	1	2	2	2	3	0	3	1	2	2	1	2	2	2	1	2	2	0	0	0	2	1	2	1	2	2	3	2	2	2	2	2	1	2	2	3	2	1	71	LG+C10+F+G
OG0001185	1	4	1	1	3	1	1	1	3	1	3	1	1	4	1	1	2	2	6	1	1	3	6	1	2	1	0	0	2	2	1	1	1	1	3	2	1	1	1	1	1	71	JTT+F+I+G4
OG0001186	1	5	3	0	1	1	2	1	5	1	2	1	1	2	0	1	2	1	5	2	1	2	4	0	1	2	1	1	1	1	1	5	1	2	2	3	1	1	1	2	1	71	LG+C20+F+G
OG0001187	2	0	3	1	1	2	3	3	0	5	3	3	1	3	0	3	1	3	3	1	0	1	0	1	1	4	2	0	2	2	0	1	2	1	4	1	1	2	2	1	2	71	JTT+F+I+G4
OG0001188	1	1	1	3	1	1	1	1	2	1	2	1	2	3	4	1	1	4	9	2	1	0	0	1	3	3	1	0	2	1	1	1	1	1	3	4	2	1	1	1	1	71	LG+C20+F+G
OG0001189	1	2	2	3	1	2	1	1	1	0	1	1	1	3	2	1	2	2	7	1	1	3	3	1	2	1	1	2	5	2	1	1	2	1	2	2	1	1	2	1	1	71	LG+C20+F+G
OG0001190	1	5	1	1	3	1	2	3	1	1	1	2	1	3	1	1	1	1	1	1	1	3	3	1	3	3	2	1	4	1	3	1	1	3	1	1	1	1	2	2	1	71	LG+C20+F+G
OG0001191	1	0	0	0	4	0	2	1	0	3	0	1	0	0	0	2	0	0	1	0	0	0	0	0	0	0	0	49	0	1	0	3	0	0	0	0	0	0	1	1	1	71	JTT+F+G4
OG0001192	1	0	1	2	2	1	3	2	4	1	1	2	5	2	2	3	1	2	5	3	1	1	3	1	1	3	1	1	1	1	1	1	4	2	1	0	1	1	1	1	1	71	LG+C20+F+G
OG0001193	1	2	2	3	2	1	2	1	2	3	1	1	1	2	1	2	2	2	3	1	0	3	2	2	1	2	1	2	1	1	1	1	2	1	2	5	1	1	1	3	3	71	LG+C20+F+G
OG0001194	2	2	1	1	2	2	2	2	2	2	1	2	1	2	1	2	1	1	2	0	1	1	2	2	3	1	2	1	1	3	2	6	2	2	1	1	2	2	2	1	2	71	LG+C40+F+G
OG0001195	1	2	1	1	1	1	1	1	1	1	2	1	1	3	3	1	1	4	5	0	1	5	6	1	1	2	1	2	4	1	1	1	2	1	2	3	1	1	1	1	1	71	LG+C20+F+G
OG0001196	4	4	1	4	3	2	3	2	0	5	0	4	0	1	3	3	1	1	0	0	1	3	1	2	1	1	0	0	1	1	2	1	2	0	1	1	1	2	3	1	4	70	JTT+F+G4
OG0001197	1	2	1	4	2	1	3	1	2	4	0	2	1	3	3	1	1	1	4	3	1	1	1	2	2	2	2	2	1	1	1	1	2	3	1	2	1	1	1	1	1	70	LG+C20+F+G
OG0001198	3	0	1	1	2	4	1	3	0	4	0	3	1	1	4	3	1	0	4	1	0	2	0	3	1	0	1	2	0	1	4	1	3	5	0	0	1	3	2	3	1	70	JTT+F+I+G4
OG0001199	3	0	1	2	3	1	1	1	2	4	1	1	2	3	3	3	2	1	10	0	2	1	1	3	1	1	1	0	1	1	1	2	4	1	0	0	1	1	2	1	1	70	LG+C40+F+G
OG0001200	2	4	1	2	2	1	1	1	3	1	2	2	1	2	1	1	1	1	6	1	1	2	4	1	1	3	2	2	1	2	1	2	1	1	1	3	1	1	1	2	1	70	JTT+F+G4
OG0001201	2	1	2	1	4	2	2	2	2	2	1	3	1	1	1	1	2	1	2	1	2	2	2	2	2	1	1	1	1	1	2	3	2	2	1	1	2	2	2	2	2	70	LG+C20+F+G
OG0001202	1	0	1	2	1	1	3	1	1	1	3	1	4	2	2	4	1	4	3	2	1	2	2	1	3	4	1	1	1	1	1	1	1	3	3	0	1	1	1	2	1	70	LG+C20+F+G
OG0001203	1	0	1	4	2	1	2	3	1	3	0	5	4	0	1	3	1	0	1	2	0	2	3	2	2	1	1	2	1	2	3	2	2	1	1	0	1	4	1	2	2	70	JTT+F+I+G4
OG0001204	1	1	2	1	3	1	2	2	2	2	1	1	1	1	1	1	1	1	6	2	1	1	2	1	2	2	1	2	1	2	2	2	2	4	1	1	2	2	2	2	2	70	LG+C20+F+G
OG0001205	1	5	5	1	1	1	1	1	2	1	2	1	1	3	1	1	2	1	4	2	0	2	6	1	3	1	1	1	2	2	1	1	1	2	1	1	1	1	1	2	2	70	JTT+F+I+G4
OG0001206	2	0	2	1	2	2	2	2	2	2	1	4	1	1	1	2	3	0	1	3	1	1	1	2	1	1	1	0	2	2	2	2	2	2	2	0	4	2	2	4	2	70	C60
OG0001207	1	7	2	1	2	1	1	1	1	1	2	1	2	0	5	3	9	2	1	1	1	1	1	1	4	1	1	0	3	1	1	1	1	1	2	2	0	1	1	1	1	70	LG+C20+F+G
OG0001208	2	1	2	1	1	1	2	3	2	3	1	1	1	2	2	1	2	2	3	2	1	2	4	1	3	1	1	1	1	2	2	1	2	2	1	1	2	2	2	1	2	70	LG4X
OG0001209	1	6	1	4	1	1	1	1	2	1	1	1	1	3	2	1	2	3	6	1	2	1	3	1	2	1	2	3	5	1	1	1	1	1	0	0	1	1	1	1	1	70	LG+C50+F+G
OG0001210	1	3	1	1	1	1	1	2	4	1	2	2	1	5	2	2	1	3	7	2	1	2	1	1	1	2	1	2	1	1	1	1	2	1	1	2	1	1	1	1	2	70	LG+C20+F+G
OG0001211	2	2	1	1	2	2	3	2	2	3	2	2	1	2	1	1	2	1	3	1	1	2	2	2	1	1	2	1	1	1	2	1	2	3	1	1	1	2	3	2	2	70	LG+C30+F+G
OG0001212	1	0	0	5	2	1	5	1	1	1	1	1	2	2	2	1	1	1	7	2	1	0	3	2	1	4	1	1	4	1	1	1	1	3	0	3	1	0	1	2	2	70	LG+C20+F+G
OG0001213	1	1	2	1	2	1	3	3	3	2	1	1	1	1	1	2	2	2	6	1	1	0	0	2	1	2	1	1	1	2	2	1	2	3	1	1	2	3	2	1	4	70	LG+C20+F+G
OG0001214	1	9	1	3	1	1	1	1	1	1	1	1	1	2	1	1	3	1	4	1	3	2	3	1	1	2	1	1	2	1	1	1	1	2	2	2	4	1	1	1	1	70	LG+C30+F+G
OG0001215	1	1	2	1	0	2	1	3	2	1	2	1	1	2	1	1	1	1	9	1	2	5	4	1	3	1	1	3	1	1	3	2	0	2	1	1	1	1	1	1	1	70	JTT+F+I+G4
OG0001216	1	3	1	4	1	1	1	1	4	1	1	1	1	2	1	1	1	2	6	2	1	0	3	1	0	1	2	2	1	7	1	1	2	1	3	2	1	1	1	2	1	70	JTT+F+I+G4
OG0001217	1	3	1	2	1	1	2	1	1	1	0	1	3	3	1	6	1	1	3	2	2	1	2	1	2	3	2	3	2	1	1	2	1	2	3	2	1	1	1	1	1	70	LG+C20+F+G
OG0001218	1	2	2	1	5	2	2	3	1	2	1	1	1	1	2	3	1	0	4	4	1	1	1	1	1	1	1	0	1	1	4	2	2	2	2	1	1	2	2	1	3	70	LG+C30+F+G
OG0001219	1	4	1	1	1	1	5	2	0	1	0	2	3	1	2	2	1	1	1	3	0	0	2	3	2	3	2	1	1	2	2	1	1	4	4	2	1	1	2	1	2	70	LG+C20+F+G
OG0001220	1	3	2	5	1	1	1	2	1	1	1	1	1	1	1	4	1	2	7	2	2	3	3	1	2	3	1	1	1	1	2	1	2	1	1	1	1	0	1	2	1	70	JTT+F+R3
OG0001221	1	2	1	2	0	1	3	3	1	2	1	1	1	2	1	0	1	2	6	2	2	1	0	2	1	1	1	0	2	1	3	1	3	5	4	4	1	1	1	1	2	70	JTT+F+I+G4
OG0001222	1	4	1	2	2	1	1	1	1	2	2	1	2	2	2	2	3	3	4	1	1	1	3	0	2	2	3	1	2	2	1	1	1	1	3	2	2	1	1	1	1	70	LG+C20+F+G
OG0001223	1	5	1	1	1	1	1	1	1	1	3	1	1	4	1	4	1	1	6	2	2	4	3	1	1	1	2	3	0	1	1	1	1	1	2	3	1	1	1	1	1	70	LG+C30+F+G
OG0001224	1	3	2	3	3	1	1	2	1	1	2	1	1	2	1	2	1	4	5	1	1	4	4	1	1	2	2	2	1	1	0	2	1	2	1	1	1	1	1	2	1	70	LG+C20+F+G
OG0001225	0	8	0	4	0	1	1	2	1	5	0	7	1	1	0	1	1	1	3	0	0	3	2	6	0	1	0	2	1	1	3	1	0	1	2	1	0	3	1	0	5	70	JTT+F+I+G4
OG0001226	0	5	3	4	1	0	0	0	0	0	5	4	7	5	0	0	3	0	3	0	1	2	2	0	0	1	1	3	1	5	0	2	0	0	3	4	2	0	0	3	0	70	LG+C20+F+G
OG0001227	0	0	70	0	0	0	0	0	0	0	0	0	0	0	0	0	0	0	0	0	0	0	0	0	0	0	0	0	0	0	0	0	0	0	0	0	0	0	0	0	0	70	JTT+F+R4
OG0001228	1	1	1	5	1	1	1	1	1	1	0	2	6	4	3	5	1	1	7	1	1	3	1	1	1	1	0	1	1	1	1	1	1	1	0	4	1	1	1	2	1	69	LG+C20+F+G
OG0001229	7	0	1	1	1	1	1	4	0	6	0	7	1	0	0	1	2	1	5	2	0	1	0	2	1	2	1	0	0	1	1	1	5	3	1	0	2	1	3	1	2	69	LG+C30+F+G
OG0001230	1	7	1	1	1	1	1	1	1	1	2	2	1	3	1	1	1	3	4	1	1	3	2	1	2	2	3	3	2	1	2	1	2	1	2	1	1	1	1	1	1	69	LG+C40+F+G
OG0001231	1	7	2	1	1	1	1	1	1	2	2	1	1	1	3	5	1	4	1	1	3	2	1	1	2	2	1	1	3	1	1	1	1	1	1	3	2	1	1	1	1	69	LG+C30+F+G
OG0001232	4	2	1	1	1	1	4	1	1	2	2	3	1	2	2	1	1	4	4	1	1	1	1	3	1	1	1	2	1	1	1	1	2	2	1	1	1	2	1	1	4	69	LG+C20+F+G
OG0001233	1	1	1	2	0	1	4	2	1	1	3	2	3	2	2	2	0	1	5	1	2	3	3	1	1	1	2	3	1	1	1	2	1	2	1	3	1	1	2	1	1	69	LG+C10+F+G
OG0001234	2	3	1	3	1	2	1	1	2	1	4	2	1	1	1	1	1	3	3	1	1	2	0	1	1	1	1	1	4	1	1	2	4	1	1	4	1	1	2	2	2	69	JTT+F+I+G4
OG0001235	1	2	2	1	3	1	2	2	2	2	1	1	1	1	1	1	1	4	2	2	0	1	0	4	2	1	1	1	1	2	2	2	3	3	1	2	2	2	2	1	3	69	LG+C20+F+G
OG0001236	3	0	0	0	0	6	5	4	4	5	0	3	0	0	0	0	0	0	2	0	0	0	0	4	2	0	0	0	0	1	6	0	3	5	0	0	1	5	5	0	5	69	LG4X
OG0001237	1	4	2	2	2	1	2	2	0	1	3	2	1	1	5	1	1	3	8	1	1	1	1	1	1	2	2	0	1	1	1	1	1	1	2	2	1	1	1	1	3	69	LG+C20+F+G
OG0001238	2	4	1	1	1	1	2	2	0	1	1	2	1	2	2	4	1	1	2	1	1	2	1	1	1	3	2	0	5	1	2	1	2	2	1	4	1	0	2	1	4	69	LG+C50+F+G
OG0001239	1	3	3	4	2	3	2	2	2	2	2	2	2	2	1	1	1	1	4	1	3	2	2	1	1	1	3	0	1	1	2	1	1	2	1	2	1	1	0	1	1	69	JTT+F+R4
OG0001240	1	9	1	5	1	1	1	1	1	1	1	1	3	1	1	1	1	1	3	1	4	3	2	1	1	3	1	2	2	1	1	1	1	1	2	2	1	1	1	1	1	69	LG+C30+F+G
OG0001241	2	3	1	1	1	1	1	1	3	1	3	1	1	3	1	3	1	3	6	2	0	1	2	1	2	4	0	0	3	1	1	1	2	2	1	3	1	1	1	2	1	69	JTT+F+I+G4
OG0001242	2	4	1	2	2	1	1	1	1	1	3	0	1	3	2	2	3	2	4	1	1	1	1	1	2	1	2	3	1	3	1	1	2	1	1	2	1	1	3	1	2	69	LG+C20+F+G
OG0001243	1	3	1	3	5	1	2	1	1	3	2	1	1	1	1	3	1	3	5	1	2	1	2	1	2	3	1	0	1	1	1	1	2	3	1	2	1	1	1	1	1	69	JTT+F+R4
OG0001244	1	1	3	1	2	1	2	2	2	2	1	1	1	1	1	1	3	1	4	2	1	1	2	1	1	1	1	1	2	5	2	2	2	2	1	1	3	2	2	2	1	69	JTT+F+I+G4
OG0001245	1	2	2	1	3	2	2	2	2	2	2	2	1	1	2	1	0	1	4	2	1	2	1	2	1	2	1	1	2	2	2	3	2	2	1	0	1	2	2	2	2	69	JTT+F+G4
OG0001246	1	4	0	2	1	1	1	1	5	1	2	1	1	4	1	1	4	3	4	1	1	1	2	1	1	1	2	1	5	1	2	2	1	2	0	0	1	2	1	2	1	69	JTT+F+I+G4
OG0001247	1	4	1	3	0	1	1	1	1	1	3	1	1	0	5	0	0	3	2	1	5	5	6	2	1	2	2	0	3	2	1	0	1	1	2	3	0	1	1	0	1	69	WAG+F+R3
OG0001248	1	4	1	2	1	1	1	1	1	1	3	1	1	4	1	6	1	1	3	2	1	0	0	1	3	4	1	1	5	1	1	1	2	1	1	3	1	1	1	2	1	69	LG+C30+F+G
OG0001249	1	2	1	2	4	1	3	1	1	1	2	1	1	2	2	1	1	2	5	2	0	2	3	2	2	1	4	3	1	1	1	1	1	1	3	1	1	1	1	1	2	69	LG+C20+F+G
OG0001250	1	3	1	3	1	1	1	4	2	1	2	1	1	3	3	2	1	2	3	2	1	1	2	1	2	1	0	6	2	2	2	1	1	1	0	3	1	1	1	1	1	69	LG+C20+F+G
OG0001251	2	1	3	1	3	2	2	2	2	2	2	2	1	2	2	1	3	2	1	2	1	2	1	2	1	1	3	0	1	1	1	2	1	2	1	1	3	2	2	1	2	69	LG+C20+F+G
OG0001252	1	1	3	0	0	0	0	0	0	0	0	0	0	0	0	0	0	0	0	1	2	3	8	1	0	7	4	0	12	1	5	2	0	0	0	2	14	0	1	0	0	68	LG+C20+F+G
OG0001253	1	2	1	1	1	1	2	4	2	1	1	1	1	2	1	1	1	2	5	1	1	2	3	1	1	0	1	2	5	1	3	1	3	2	5	1	1	1	1	1	1	69	JTT+F+R3
OG0001254	1	5	2	3	1	1	1	1	1	1	2	1	2	1	1	1	1	1	1	3	2	2	3	1	1	4	1	0	3	1	1	1	1	1	3	5	2	1	1	3	1	69	LG+C30+F+G
OG0001255	1	3	1	1	1	1	1	1	3	1	2	1	1	3	2	1	1	2	8	2	1	4	6	1	1	1	1	4	1	1	1	1	1	1	1	1	1	1	1	1	1	69	LG+C20+F+G
OG0001256	1	2	0	1	4	1	1	1	3	1	3	1	1	2	1	1	2	1	3	1	3	3	4	1	2	2	3	2	2	1	1	2	1	2	1	1	1	1	2	2	1	69	LG+C30+F+G
OG0001257	2	1	0	2	0	2	2	4	2	2	0	0	1	3	1	1	0	1	1	1	3	2	4	3	0	2	0	0	4	7	3	2	2	2	2	1	0	2	2	0	2	69	JTT+F+R4
OG0001258	2	1	1	1	1	2	2	2	3	2	3	2	1	1	1	1	4	2	1	1	2	2	2	2	1	1	2	3	1	1	2	2	2	2	1	1	1	2	2	1	2	69	JTT+F+I+G4
OG0001259	1	3	1	1	1	1	1	1	1	1	3	1	1	3	4	1	2	2	6	2	1	2	4	1	2	2	2	4	1	1	1	1	1	1	1	2	1	1	1	1	1	69	LG+C20+F+G
OG0001260	1	6	1	1	1	1	1	1	2	1	2	1	1	3	1	1	1	2	5	1	1	4	3	1	1	1	1	1	1	1	1	2	1	1	5	4	1	1	1	2	1	69	LG+C20+F+G
OG0001261	1	7	2	1	2	1	1	1	3	1	4	1	1	2	1	1	1	2	2	1	2	5	3	1	2	1	2	1	3	1	1	1	1	1	1	1	1	1	1	1	2	69	LG+C20+F+G
OG0001262	1	5	2	1	1	1	1	1	2	1	4	1	1	2	2	1	1	1	3	2	1	1	4	1	3	1	2	3	2	1	2	2	1	2	2	1	1	1	1	1	2	69	LG+C20+F+G
OG0001263	1	5	1	3	3	1	1	1	3	1	2	2	1	2	4	2	1	3	5	1	1	2	2	1	2	1	0	1	2	1	1	1	2	1	1	1	1	1	1	2	1	69	JTT+F+I+G4
OG0001264	1	7	1	1	1	1	1	1	2	1	2	1	1	4	1	1	1	1	6	1	2	2	4	1	1	1	1	3	3	1	1	3	1	1	1	2	1	1	1	1	1	69	LG+C40+F+G
OG0001265	1	5	3	1	1	1	1	1	0	1	2	2	1	4	2	1	1	1	9	1	1	3	4	1	1	1	1	1	1	0	1	1	1	1	2	4	1	1	1	2	1	69	JTT+F+I+G4
OG0001266	1	1	0	4	1	2	1	1	6	1	3	1	1	1	1	1	2	1	3	1	1	3	3	1	1	4	1	0	3	1	2	1	1	3	1	4	0	1	1	3	1	69	JTT+F+R4
OG0001267	0	1	0	0	1	8	19	6	0	13	0	0	2	2	0	0	0	0	0	0	0	0	0	1	0	2	0	0	0	0	0	0	0	1	0	2	0	0	9	0	2	69	LG+C20+F+G
OG0001268	2	1	3	2	1	1	1	1	2	2	0	4	0	1	1	2	1	1	9	1	2	1	1	1	1	1	2	3	1	1	1	0	4	1	2	5	1	1	1	1	1	68	LG+C20+F+G
OG0001269	1	3	1	2	2	1	2	2	2	1	2	1	1	2	2	1	1	2	4	2	0	3	0	3	2	1	1	0	3	1	2	1	4	1	1	4	1	1	1	2	1	68	JTT+F+I+G4
OG0001270	1	5	1	3	2	2	1	1	1	1	2	1	1	3	2	3	2	1	6	2	1	3	3	1	1	1	1	1	1	1	1	2	1	1	1	2	1	1	1	1	1	68	JTT+F+R4
OG0001271	1	2	1	2	1	1	1	1	1	1	0	1	1	2	3	1	1	2	6	3	0	3	4	1	2	4	3	3	1	0	1	1	1	1	4	2	1	1	1	1	1	68	LG+C20+F+G
OG0001272	1	5	1	1	1	1	1	1	3	1	2	1	1	2	2	1	1	3	2	1	2	3	2	1	1	1	3	5	1	1	2	1	1	1	1	4	1	1	1	1	2	68	LG+C20+F+G
OG0001273	2	2	1	1	1	1	3	1	1	1	2	1	1	1	1	1	5	2	3	1	1	2	2	2	1	2	1	2	2	2	1	2	1	2	2	2	1	1	3	2	2	68	JTT+F+I+G4
OG0001274	1	4	0	1	0	0	0	1	0	0	0	0	1	0	0	0	0	0	0	2	5	12	4	0	0	14	0	0	15	0	0	0	0	0	2	5	0	0	1	0	0	68	LG+C10+F+G
OG0001275	2	4	1	1	1	2	2	2	2	2	1	2	1	1	2	1	1	2	3	1	1	2	2	2	1	1	1	2	1	3	2	2	2	2	1	1	1	2	2	1	2	68	LG+C20+F+G
OG0001276	4	2	1	1	1	1	3	1	3	2	1	3	2	3	1	2	1	2	5	0	0	1	0	1	2	2	1	1	2	1	1	0	1	5	1	3	1	1	2	0	3	68	JTT+F+I+G4
OG0001277	1	0	1	2	1	4	0	3	0	3	0	0	2	2	3	1	1	2	0	2	0	0	1	2	2	3	0	0	2	1	5	1	4	3	4	2	1	4	1	2	2	68	JTT+F+I+G4
OG0001278	2	3	1	5	2	1	1	1	3	1	1	1	2	2	3	1	1	3	6	2	1	1	1	1	2	0	1	1	2	1	1	1	2	1	4	1	1	1	1	1	1	68	LG+C20+F+G
OG0001279	2	0	1	0	1	1	4	6	0	3	0	3	0	0	0	1	1	0	0	2	0	1	0	2	3	1	2	3	6	1	6	1	5	2	0	0	2	4	1	2	1	68	C60
OG0001280	4	8	1	1	1	1	3	1	0	3	1	1	0	2	2	1	1	1	3	0	0	4	2	2	4	1	2	2	1	1	1	1	2	3	0	2	1	1	1	1	1	68	LG+C20+F+G
OG0001281	2	1	2	1	2	2	2	2	2	2	1	2	2	1	1	1	1	1	7	2	1	1	1	2	1	1	1	2	1	1	2	2	2	2	1	1	1	2	2	2	2	68	LG+C20+F+G
OG0001282	2	4	0	3	2	1	1	1	2	1	3	1	2	1	1	1	1	2	5	2	1	2	0	1	2	1	2	2	2	2	1	2	1	1	1	2	1	2	1	2	3	68	JTT+F+I+G4
OG0001283	1	1	2	1	2	1	1	7	7	1	2	3	1	2	1	1	1	2	3	1	1	2	3	1	2	1	0	0	1	1	2	0	4	1	1	1	1	1	1	2	1	68	JTT+F+I+G4
OG0001284	2	2	1	2	1	1	2	2	2	2	2	1	2	1	1	2	2	3	2	1	2	1	3	2	2	3	1	1	1	2	2	1	2	2	1	2	1	1	1	1	2	68	LG+C20+F+G
OG0001285	1	2	2	1	1	2	3	3	3	3	1	1	2	1	1	1	2	1	2	1	1	1	1	1	1	1	1	3	1	1	2	2	2	3	1	1	2	3	3	1	2	68	LG+C10+F+G
OG0001286	1	1	1	3	1	1	1	1	1	1	2	1	1	1	2	1	2	1	4	1	2	3	3	1	1	1	1	1	1	2	1	11	1	2	1	1	1	1	1	2	1	67	JTT+F+I+G4
OG0001287	2	2	6	1	1	1	3	3	1	1	0	2	1	1	0	1	2	1	0	1	1	1	1	3	1	1	1	5	1	3	1	3	2	3	1	1	2	2	2	0	3	68	LG+C20+F+G
OG0001288	1	0	1	2	2	1	3	1	1	1	3	1	2	2	1	4	1	3	8	1	3	0	1	3	1	1	1	0	5	1	1	1	2	2	1	1	1	1	1	1	1	68	LG+C20+F+G
OG0001289	1	4	2	1	2	1	2	1	2	3	2	3	1	2	1	2	2	1	1	1	1	3	2	2	3	0	1	1	1	2	1	1	2	1	1	4	1	1	2	2	1	68	JTT+F+I+G4
OG0001290	2	1	3	1	2	1	2	2	2	2	1	2	1	2	1	1	3	1	5	1	1	0	0	3	1	1	1	0	1	2	2	2	2	2	1	1	3	2	2	3	2	68	JTT+F+G4
OG0001291	1	3	2	1	1	1	2	1	3	1	2	1	2	2	1	2	1	1	4	1	1	5	0	1	1	5	2	3	2	1	1	1	1	3	2	1	1	1	1	1	1	68	LG+C30+F+G
OG0001292	1	1	1	4	1	2	2	1	1	2	2	1	1	1	2	3	1	3	5	1	0	0	2	1	1	4	1	0	3	1	1	2	1	1	3	4	1	1	3	1	1	68	LG+C20+F+G
OG0001293	1	4	1	4	1	1	1	1	1	1	2	1	1	2	2	1	1	1	7	1	1	1	2	1	2	2	1	3	3	2	1	1	2	1	2	4	1	0	1	1	1	68	JTT+F+I+G4
OG0001294	1	0	1	1	1	4	5	2	0	2	0	2	1	0	1	1	1	4	2	2	0	0	0	2	1	0	3	3	4	2	1	1	1	3	0	2	2	1	3	2	6	68	LG+C20+F+G
OG0001295	2	1	4	1	1	2	2	1	1	2	1	2	1	2	1	1	3	3	1	1	1	1	2	2	2	1	1	1	2	2	2	1	2	2	1	1	2	3	2	2	2	68	LG+C40+F+G
OG0001296	1	2	1	1	2	1	1	2	1	1	2	2	1	2	2	1	1	2	5	2	1	1	4	1	1	1	1	2	2	1	1	2	1	2	1	2	2	1	1	6	1	68	JTT+F+I+G4
OG0001297	2	4	5	1	1	1	2	3	1	1	2	2	1	2	1	0	2	2	4	1	1	3	5	2	2	1	1	0	1	1	1	1	1	1	2	1	1	1	1	2	1	68	JTT+F+I+G4
OG0001298	1	0	11	0	6	1	1	1	1	1	0	1	0	1	1	1	6	0	2	3	0	0	0	1	1	1	9	0	1	3	1	3	1	1	1	0	1	1	1	3	1	68	C60
OG0001299	2	0	3	1	2	4	2	0	2	1	0	4	2	2	1	3	2	0	1	2	0	0	0	3	2	0	1	3	3	3	2	2	0	2	1	0	2	4	3	2	1	68	JTT+F+I+G4
OG0001300	2	2	2	0	1	2	2	2	2	2	1	2	1	1	2	2	2	1	3	2	1	1	1	2	2	1	1	1	2	2	2	2	2	3	1	1	2	2	2	1	2	68	LG+C30+F+G
OG0001301	1	3	2	1	2	1	2	1	2	1	3	1	1	4	1	1	1	1	4	2	2	2	5	1	2	3	1	2	1	1	1	1	1	2	2	1	1	1	1	1	1	68	LG+C20+F+G
OG0001302	1	3	2	2	1	1	2	1	2	2	1	1	1	1	1	1	3	1	4	2	2	1	2	1	1	2	1	1	3	3	2	2	2	2	1	1	2	2	2	1	1	68	LG+C20+F+G
OG0001303	2	6	2	3	1	1	2	1	1	1	3	2	1	3	1	3	2	1	1	2	1	2	3	2	1	2	2	1	1	1	1	1	2	2	1	1	1	1	1	1	1	68	JTT+F+I+G4
OG0001304	2	1	5	1	1	1	1	1	1	1	1	1	1	3	3	2	3	1	5	1	2	2	2	1	1	2	2	2	1	2	1	1	1	1	1	1	1	1	1	5	1	68	LG+C20+F+G
OG0001305	1	3	1	2	1	1	1	1	1	1	3	1	1	2	1	1	1	3	7	1	1	5	4	1	3	2	2	0	1	1	1	2	1	1	1	1	1	1	2	2	1	68	JTT+F+I+G4
OG0001306	1	2	2	2	2	1	1	0	2	1	1	1	1	1	2	1	2	2	2	1	1	5	4	1	1	2	1	1	4	1	1	1	1	2	3	1	2	2	2	3	1	68	C60
OG0001307	1	1	0	3	0	0	1	1	1	1	3	1	2	2	1	1	0	2	1	2	1	1	1	1	2	0	2	5	1	2	1	13	1	1	1	1	1	2	2	4	1	68	LG4M
OG0001308	1	8	1	1	1	1	1	2	2	1	2	1	1	3	1	1	0	0	0	1	0	4	5	1	3	1	2	2	1	4	1	1	1	1	1	4	1	1	1	3	1	68	JTT+F+I+G4
OG0001309	1	7	1	2	1	1	1	2	1	2	3	1	1	2	4	1	1	1	5	1	4	3	2	1	1	1	1	1	1	0	1	1	1	2	1	1	1	3	1	1	1	68	LG+C20+F+G
OG0001310	1	10	1	1	2	1	1	1	4	1	2	1	1	3	1	1	1	1	4	1	1	1	3	1	1	1	1	4	1	2	1	1	1	1	2	1	1	1	1	2	1	68	LG+C20+F+G
OG0001311	1	6	1	3	1	1	1	1	1	3	4	2	2	3	1	1	1	2	2	1	2	4	2	2	2	2	1	1	1	1	1	1	1	1	1	1	2	1	1	1	1	68	LG+C20+F+G
OG0001312	1	0	13	1	1	1	1	1	1	1	1	3	2	2	0	1	4	2	2	1	0	0	1	1	1	0	2	2	1	1	3	1	1	1	1	0	1	1	1	9	1	68	LG+C30+F+G
OG0001313	1	4	4	2	3	1	1	1	1	1	1	1	2	1	2	2	2	1	4	1	2	1	2	1	1	2	1	2	2	0	1	2	1	1	2	2	4	1	1	2	1	68	C60
OG0001314	1	3	3	4	1	1	4	1	0	3	0	4	1	1	0	0	1	1	0	1	1	1	1	3	1	1	1	3	1	1	3	2	2	3	2	1	1	4	1	1	3	67	LG+C20+F+G
OG0001315	1	2	3	1	1	1	1	0	1	1	1	1	1	2	2	1	3	1	4	5	2	1	3	1	2	4	0	3	3	1	1	3	1	1	2	2	1	1	1	1	1	68	LG+C40+F+G
OG0001316	1	2	2	2	2	1	1	1	0	1	1	2	1	0	1	2	1	1	5	1	0	1	0	1	2	1	1	5	1	11	1	8	1	1	0	1	1	1	1	1	1	68	C60
OG0001317	1	1	2	1	1	1	1	1	1	1	2	2	1	3	4	2	1	0	6	3	1	1	2	1	1	2	2	2	1	1	1	3	2	1	3	2	2	1	1	2	1	68	LG+C20+F+G
OG0001318	1	1	1	3	2	1	1	2	4	1	3	2	1	3	1	1	2	2	6	1	1	1	2	1	2	1	1	2	2	1	1	3	1	2	1	2	1	1	0	2	1	68	JTT+F+I+G4
OG0001319	1	0	2	3	2	1	1	1	1	1	3	1	2	2	4	0	2	2	4	1	2	4	2	1	4	2	1	1	2	3	1	2	1	1	1	1	1	1	1	1	1	68	LG+C30+F+G
OG0001320	1	4	1	1	2	1	1	1	3	1	1	1	3	1	2	2	3	1	5	3	0	0	2	1	1	2	1	2	4	1	1	1	1	1	3	2	1	1	1	3	1	68	LG+C20+F+G
OG0001321	1	1	1	3	2	1	2	2	4	2	3	2	1	1	2	1	1	1	3	1	1	2	1	0	2	1	1	1	2	1	1	1	2	5	2	2	1	1	3	1	2	68	JTT+F+I+G4
OG0001322	1	1	1	4	0	3	2	2	4	3	0	2	2	2	3	2	3	0	4	2	1	2	2	1	1	2	0	0	3	1	3	1	1	1	2	0	1	1	1	1	2	68	JTT+F+I+G4
OG0001323	1	0	1	2	1	1	1	1	3	1	1	1	1	3	1	1	1	2	10	1	1	0	3	1	2	1	1	2	6	1	1	1	2	1	4	2	1	1	1	1	1	68	LG+C40+F+G
OG0001324	1	7	1	4	1	1	1	1	1	1	2	1	1	1	2	1	1	1	4	1	1	3	3	1	1	1	1	3	4	2	1	1	1	1	2	2	2	1	1	1	1	68	LG+C20+F+G
OG0001325	1	1	1	1	0	1	3	2	2	2	1	1	3	1	1	2	1	1	4	1	3	4	2	1	1	1	1	1	2	2	2	2	2	3	1	2	1	2	2	2	1	68	LG+C30+F+G
OG0001326	1	1	3	1	3	1	3	2	3	2	2	2	1	2	1	0	4	0	3	1	1	2	2	1	1	1	2	2	1	2	2	2	2	2	1	1	1	1	1	2	1	67	LG+C20+F+G
OG0001327	1	3	1	3	1	1	3	1	2	1	1	1	3	3	3	1	3	1	7	2	0	0	0	1	1	3	3	0	2	1	1	1	1	2	2	2	1	1	1	1	1	67	LG+C20+F+G
OG0001328	1	0	0	2	0	2	3	2	4	3	2	1	1	1	1	1	0	3	0	1	3	2	2	1	1	0	6	0	2	0	2	1	1	2	0	0	7	4	1	2	2	67	LG4X
OG0001329	1	3	2	1	1	1	2	2	1	1	1	2	2	2	1	1	1	0	2	1	2	3	0	4	2	1	0	3	1	1	3	1	2	2	3	3	1	1	1	1	4	67	JTT+F+I+G4
OG0001330	1	3	1	1	2	1	2	2	2	1	2	2	1	2	0	4	1	1	6	2	1	0	0	1	3	2	4	3	2	1	1	1	1	1	1	1	1	2	1	2	1	67	JTT+F+I+G4
OG0001331	1	1	1	2	0	2	2	3	2	1	2	1	1	2	3	3	2	1	0	0	1	2	1	2	1	1	2	3	2	1	1	2	1	1	3	2	1	2	2	3	3	67	LG+C10+F+G
OG0001332	3	1	1	1	1	2	3	3	4	2	2	1	1	1	0	1	2	0	4	1	1	3	2	3	1	1	1	0	1	1	2	1	2	3	1	1	1	2	2	1	3	67	JTT+F+I+G4
OG0001333	2	1	2	1	2	2	2	2	2	2	2	1	1	2	1	1	2	1	2	1	2	1	2	2	2	1	2	1	1	2	1	2	2	2	1	1	2	2	2	2	2	67	LG+C20+F+G
OG0001334	1	2	4	1	1	1	1	1	1	1	1	1	1	1	1	1	1	3	2	1	2	1	4	1	1	3	2	2	1	2	1	2	2	1	2	2	1	1	2	6	1	67	C60
OG0001335	2	3	1	1	2	2	2	2	1	4	2	1	2	1	1	1	1	0	3	1	2	0	2	2	1	2	2	2	2	1	2	1	2	2	1	1	1	2	2	2	2	67	JTT+F+I+G4
OG0001336	2	4	1	2	1	2	2	2	3	2	3	1	1	2	1	0	2	2	4	1	1	1	2	2	1	1	2	0	1	1	2	1	2	2	1	1	1	2	2	1	2	67	LG+C30+F+G
OG0001337	3	3	5	1	2	1	1	1	3	1	0	1	3	3	2	1	1	2	2	1	0	2	2	2	3	1	1	1	1	0	3	1	1	1	3	2	1	1	1	2	1	67	LG+C20+F+G
OG0001338	2	5	3	1	4	2	2	2	1	2	1	1	1	1	0	1	7	1	1	2	1	1	1	3	2	1	1	0	1	1	0	1	2	2	1	1	1	0	2	4	1	67	LG+C30+F+G
OG0001339	1	1	2	1	1	2	2	2	2	2	1	1	1	4	3	2	2	1	2	4	1	1	1	1	0	1	1	0	1	1	2	1	1	2	3	4	3	2	1	2	1	67	C50
OG0001340	1	3	1	1	1	1	4	1	3	3	2	2	1	3	1	3	1	1	4	1	1	1	3	1	1	2	2	0	1	1	1	2	3	1	1	3	1	1	1	1	1	67	JTT+F+I+G4
OG0001341	4	3	0	1	2	1	1	1	1	1	1	1	1	2	2	1	1	1	6	1	1	6	4	3	2	3	1	1	1	1	0	1	2	1	0	3	1	1	1	1	1	67	LG+C20+F+G
OG0001342	2	1	2	1	2	1	2	2	2	2	1	1	2	1	1	2	2	1	3	2	1	1	1	1	1	2	1	1	1	3	2	2	2	2	2	1	2	2	2	2	2	67	LG+C10+F+G
OG0001343	3	0	6	1	1	4	4	3	4	5	1	0	0	0	1	1	0	0	2	1	0	0	0	3	3	0	1	0	0	0	3	0	3	3	0	0	4	3	4	0	3	67	JTT+F+I+G4
OG0001344	1	2	1	1	2	1	2	0	1	1	1	2	1	3	1	1	2	1	6	1	3	2	4	1	1	2	1	2	3	2	1	2	1	1	1	1	3	1	1	2	1	67	LG+C20+F+G
OG0001345	1	5	1	2	1	1	1	1	3	1	1	2	1	3	1	1	1	5	4	2	3	4	2	1	1	1	1	0	1	2	1	1	1	1	2	3	0	1	1	1	1	67	JTT+F+I+G4
OG0001346	2	1	2	1	1	2	2	2	2	2	2	1	1	1	1	1	1	3	2	1	1	3	3	2	1	1	1	2	1	2	1	2	1	2	1	1	1	2	4	2	2	67	LG+C20+F+G
OG0001347	2	4	2	2	2	2	3	1	1	1	1	2	2	1	1	3	5	1	3	1	1	1	1	1	1	3	1	0	3	1	1	2	1	2	1	2	1	1	1	1	1	67	JTT+F+I+G4
OG0001348	3	4	1	2	1	3	2	2	2	2	2	1	1	2	1	1	1	0	3	1	1	2	3	2	2	1	1	2	1	1	1	2	2	1	2	1	2	1	1	2	1	67	LG+C20+F+G
OG0001349	2	1	1	2	1	1	2	1	1	1	0	2	2	1	1	3	1	0	6	2	0	3	2	2	4	1	0	2	1	1	1	1	2	2	5	4	1	1	1	1	1	67	LG+C20+F+G
OG0001350	3	3	2	1	2	1	1	4	0	4	1	3	4	1	1	1	1	0	2	1	0	0	0	2	3	2	0	1	2	1	2	1	4	1	1	0	1	4	1	1	4	67	JTT+F+G4
OG0001351	1	4	3	2	1	1	1	1	2	1	1	1	1	3	2	3	1	1	4	3	2	2	2	1	3	1	4	1	1	1	1	1	1	2	1	1	1	1	1	1	1	67	LG+C30+F+G
OG0001352	1	5	1	1	1	1	2	1	2	1	3	1	1	2	1	2	1	2	3	1	1	5	3	1	2	1	2	1	1	1	2	1	1	5	1	1	1	1	1	1	1	67	LG+C30+F+G
OG0001353	1	2	2	2	5	1	1	1	1	1	0	1	1	3	2	4	1	1	3	3	1	5	4	1	1	3	1	0	3	1	1	0	1	1	2	1	1	1	1	1	1	67	JTT+F+I+G4
OG0001354	2	1	1	0	0	3	3	2	2	3	1	1	1	2	1	5	0	1	4	3	1	1	2	2	1	1	1	1	1	1	2	2	1	2	1	1	1	2	2	2	3	67	LG+C30+F+G
OG0001355	1	1	2	2	1	2	2	2	2	2	1	1	1	2	2	1	3	2	6	2	1	1	0	1	1	1	2	1	2	1	2	2	2	2	2	1	1	2	2	1	1	67	LG+C20+F+G
OG0001356	1	3	2	1	1	1	1	1	1	1	1	1	1	1	2	1	1	4	5	1	1	5	5	1	1	1	3	3	1	1	2	1	1	1	1	1	1	1	1	2	2	67	LG+C20+F+G
OG0001357	1	2	1	1	2	1	1	1	4	1	1	1	1	3	2	2	1	4	7	1	2	2	3	1	2	1	2	1	1	1	1	1	1	1	1	3	1	1	1	1	1	67	LG+C20+F+G
OG0001358	2	0	2	1	4	2	1	2	1	2	3	1	1	2	1	2	1	1	1	3	2	0	1	2	2	1	1	3	1	3	1	3	2	2	0	0	2	2	2	3	1	67	JTT+F+I+G4
OG0001359	2	2	4	0	1	1	3	2	0	1	1	2	3	1	4	1	1	0	4	2	0	2	3	3	1	2	2	2	1	1	1	1	1	2	1	1	0	1	1	2	4	67	C60
OG0001360	1	3	1	3	2	1	1	1	1	1	0	2	1	4	2	1	1	5	2	3	1	2	3	1	2	1	1	1	1	2	1	1	4	1	1	2	1	1	1	2	1	67	JTT+F+I+G4
OG0001361	1	1	2	1	1	1	2	1	2	2	1	1	1	1	0	2	2	1	5	2	1	1	1	1	2	2	1	3	3	2	2	3	2	3	1	1	2	2	2	1	1	67	LG+C20+F+G
OG0001362	1	6	1	1	1	1	1	1	1	1	2	1	1	3	3	1	1	4	4	1	2	4	2	1	1	1	1	2	1	1	1	1	2	2	1	2	1	1	1	2	1	67	LG+C20+F+G
OG0001363	1	4	1	1	1	1	1	1	1	1	3	1	1	3	3	1	1	3	7	1	1	3	5	1	1	1	1	1	1	1	1	1	1	1	1	3	1	1	1	2	1	67	LG+C40+F+G
OG0001364	2	4	1	3	1	0	1	1	3	2	1	1	2	1	1	1	1	1	5	1	1	2	3	1	1	1	3	3	2	1	1	1	2	1	2	1	2	1	1	3	1	67	LG+C20+F+G
OG0001365	1	5	1	3	1	1	2	1	2	1	4	1	1	2	1	2	1	3	3	2	1	2	2	1	2	1	1	2	2	1	1	1	1	2	1	3	1	1	1	1	1	67	LG+C20+F+G
OG0001366	1	4	2	2	1	1	1	2	3	1	2	4	1	3	1	1	1	2	3	1	2	3	3	1	2	1	1	1	1	1	1	1	2	1	1	1	1	1	2	1	2	67	LG+C30+F+G
OG0001367	1	3	1	4	1	1	1	2	0	1	1	1	5	2	3	3	1	3	2	1	2	2	2	1	1	1	1	2	4	1	1	2	1	1	1	2	1	1	1	1	1	67	LG+C20+F+G
OG0001368	1	1	1	0	6	2	7	1	0	6	0	2	0	1	0	4	1	1	2	3	0	1	1	2	1	1	0	2	2	1	1	1	1	5	1	0	1	4	1	1	1	67	JTT+F+G4
OG0001369	1	3	1	1	0	1	2	1	2	2	1	1	1	3	3	2	1	3	2	6	0	1	1	1	2	2	1	2	2	1	1	1	1	2	2	2	1	1	2	1	2	66	LG4X
OG0001370	1	5	2	2	2	1	1	2	4	1	2	1	1	2	3	1	1	1	3	3	1	1	5	1	1	2	1	1	3	1	1	1	1	1	2	0	1	1	1	1	1	67	LG+C20+F+G
OG0001371	1	7	1	3	3	1	1	1	2	1	1	1	1	2	2	1	1	2	6	4	1	3	2	1	2	1	1	1	1	1	0	1	1	1	1	2	1	1	1	1	1	67	LG+C20+F+G
OG0001372	1	4	1	1	1	1	3	1	1	1	2	1	1	1	1	1	1	3	10	2	1	2	2	1	3	1	1	2	2	1	1	1	1	3	1	1	1	1	1	1	1	67	LG+C20+F+G
OG0001373	1	5	1	1	1	1	1	1	2	1	2	1	1	3	1	2	1	2	8	1	1	2	2	1	1	2	2	1	1	2	1	1	1	1	1	3	2	1	1	2	1	67	LG+C20+F+G
OG0001374	1	3	3	1	2	1	1	1	2	1	2	1	1	1	1	1	2	2	5	1	2	4	2	1	1	2	3	1	2	1	1	2	1	1	2	1	2	1	1	2	1	67	LG+C20+F+G
OG0001375	1	0	0	0	0	1	3	0	0	0	1	0	0	2	0	0	0	1	2	0	0	0	0	0	0	1	4	2	1	1	0	0	0	0	2	0	45	0	0	0	0	67	LG+C20+F+G
OG0001376	0	3	1	3	0	4	1	2	0	3	0	2	1	1	0	2	5	0	1	1	0	1	0	0	1	3	0	2	1	1	0	2	3	3	4	1	2	3	5	3	2	67	JTT+F+G4
OG0001377	16	1	0	0	1	2	0	0	0	2	0	0	1	0	0	1	0	0	0	0	0	1	1	16	0	0	1	0	0	0	2	0	16	1	1	0	0	0	1	0	2	66	JTT+F+R4
OG0001378	3	0	0	0	0	7	5	2	5	8	0	0	0	2	1	0	0	0	2	3	0	0	0	3	0	0	0	0	0	0	2	0	3	6	0	0	0	1	7	0	6	66	JTT+F+I+G4
OG0001379	5	0	12	0	0	1	0	3	0	2	0	0	0	0	0	2	19	0	0	0	0	0	0	1	0	0	1	1	0	2	2	1	5	0	0	0	0	2	7	0	0	66	LG+C10+F+G
OG0001380	1	5	1	2	0	1	1	1	0	1	2	1	1	2	4	1	1	2	7	2	1	3	2	1	1	2	4	0	1	1	1	0	1	1	1	2	1	1	1	1	4	66	JTT+F+I+G4
OG0001381	1	2	1	2	4	1	1	1	1	1	1	1	2	1	1	3	1	1	2	4	3	2	5	1	1	2	1	1	3	1	1	1	1	1	2	2	1	1	1	2	1	66	LG+C40+F+G
OG0001382	1	2	1	1	2	2	1	1	2	1	2	1	1	5	2	1	0	2	6	2	1	2	0	1	2	3	1	2	4	1	1	1	2	2	2	0	1	1	1	1	1	66	LG+C40+F+G
OG0001383	1	0	2	3	1	1	1	1	1	1	1	1	2	1	1	3	1	1	6	2	1	1	1	4	2	2	1	2	1	1	1	2	1	3	4	2	2	1	1	1	1	66	LG+C20+F+G
OG0001384	2	1	2	1	1	2	2	2	2	2	1	1	1	2	2	1	2	1	2	1	1	1	1	2	2	1	1	1	1	2	2	2	2	2	1	2	3	2	2	2	2	66	LG+C40+F+G
OG0001385	1	4	2	3	2	1	1	1	3	1	1	1	1	4	1	1	1	2	4	1	1	1	0	1	1	6	1	4	2	1	1	1	1	1	1	1	1	1	1	2	1	66	JTT+F+G4
OG0001386	2	1	3	1	3	2	2	2	2	2	0	2	1	1	3	0	1	1	5	0	1	0	1	2	2	1	1	0	1	1	2	2	2	2	1	1	3	2	2	3	2	66	LG+C30+F+G
OG0001387	1	4	1	1	1	1	1	1	1	1	4	1	1	5	2	1	1	2	4	1	3	4	3	1	1	1	2	3	1	1	1	1	1	1	1	1	1	1	1	1	1	66	LG+C20+F+G
OG0001388	2	2	2	1	1	2	2	2	2	2	1	2	1	1	2	2	1	1	0	1	2	2	2	2	1	2	2	0	3	2	2	2	2	2	1	1	1	2	1	2	2	66	JTT+F+G4
OG0001389	2	2	2	3	1	1	2	4	2	3	0	3	2	1	1	2	1	0	1	2	0	4	0	3	1	1	0	4	2	2	1	1	4	1	1	0	0	1	2	2	1	66	JTT+F+G4
OG0001390	1	5	1	1	1	1	3	1	2	1	2	1	1	1	0	0	2	4	4	2	1	3	2	1	2	1	3	0	1	1	2	1	2	2	2	1	1	1	1	1	3	66	LG+C10+F+G
OG0001391	1	5	1	0	1	1	2	3	1	1	0	4	0	0	3	2	2	0	5	2	0	2	2	3	1	1	0	3	4	1	1	1	1	1	3	3	0	1	1	1	2	66	JTT+F+G4
OG0001392	2	1	1	3	1	1	1	0	5	1	2	1	1	1	1	1	1	1	5	2	1	5	3	1	1	1	1	2	2	1	2	2	2	1	2	1	1	1	1	1	2	66	JTT+F+G4
OG0001393	1	0	1	1	1	1	4	3	0	1	3	1	1	2	1	1	1	2	5	2	1	1	1	3	1	2	1	2	3	1	1	1	1	3	1	4	1	1	1	1	3	66	LG+C20+F+G
OG0001394	1	0	1	2	1	1	1	2	2	1	1	1	2	1	1	2	3	2	2	2	1	0	1	1	1	2	2	2	4	1	1	1	3	5	2	2	1	1	1	1	4	66	LG+C30+F+G
OG0001395	3	1	3	4	2	1	1	3	3	0	0	3	4	3	4	2	2	0	1	2	1	1	1	1	2	1	0	5	0	1	3	1	1	1	0	0	1	1	1	0	2	66	JTT+F+G4
OG0001396	2	0	1	1	1	1	1	1	2	1	3	2	1	4	1	2	1	2	6	2	1	0	4	2	1	4	1	0	5	1	1	1	1	1	1	2	1	1	1	1	1	66	LG+C20+F+G
OG0001397	2	3	1	1	2	1	2	1	2	2	0	4	1	1	0	0	1	1	4	1	1	3	0	3	3	2	1	2	1	1	1	1	2	2	2	2	2	1	1	1	4	66	JTT+F+I+G4
OG0001398	1	4	1	1	1	1	1	1	2	1	0	1	3	3	1	2	1	2	6	1	2	3	1	1	2	2	2	1	1	3	1	2	2	1	1	1	1	1	1	2	1	66	LG+C40+F+G
OG0001399	3	6	1	0	1	1	4	2	0	2	0	3	0	1	2	1	3	0	2	2	1	3	0	2	1	1	0	6	1	2	1	1	1	5	0	0	1	2	1	1	2	66	LG4X
OG0001400	2	1	2	1	1	2	5	2	3	3	1	1	1	1	1	1	1	1	4	0	1	2	1	2	1	1	1	3	1	1	2	2	2	2	1	0	2	2	2	1	2	66	JTT+F+I+G4
OG0001401	1	4	1	3	1	1	1	2	3	2	3	2	1	3	1	1	1	4	5	1	1	1	2	1	2	1	1	2	1	1	1	1	1	1	1	2	1	1	1	1	1	66	JTT+F+I+G4
OG0001402	1	3	2	3	2	1	1	1	1	1	1	2	1	1	1	1	1	3	2	1	2	1	3	2	3	1	3	1	3	1	1	1	1	1	3	3	1	1	1	2	1	66	LG+C20+F+G
OG0001403	2	2	2	1	2	1	1	1	4	1	0	1	1	2	4	1	1	0	4	2	1	0	0	1	2	0	1	1	1	9	1	1	1	1	2	5	1	1	1	2	1	66	JTT+F+I+G4
OG0001404	1	2	1	1	1	1	1	1	1	1	3	2	1	4	2	1	1	1	4	1	4	6	4	1	2	1	2	1	0	1	1	1	1	1	1	1	1	1	1	3	1	66	JTT+F+I+G4
OG0001405	1	2	1	1	6	2	2	1	2	1	1	3	1	2	1	1	1	2	2	1	1	3	3	1	3	1	1	1	1	2	1	2	1	1	1	3	0	1	1	3	1	66	JTT+F+I+G4
OG0001406	3	2	2	3	2	1	1	2	2	2	0	2	1	3	3	1	3	1	2	1	0	2	0	2	1	1	1	3	2	2	1	1	1	1	1	2	3	1	1	2	1	66	LG+C20+F+G
OG0001407	1	3	1	1	1	1	1	1	1	1	1	1	1	2	3	1	1	1	4	2	1	4	1	1	2	3	2	4	4	1	1	1	1	1	4	2	1	1	1	1	0	66	LG+C30+F+G
OG0001408	1	6	4	2	1	1	1	2	2	1	1	1	1	4	1	1	1	2	4	3	1	3	2	1	2	1	1	2	1	1	1	1	1	1	0	2	1	1	1	1	1	66	LG+C20+F+G
OG0001409	1	7	1	1	1	1	1	1	1	1	1	1	1	2	1	1	1	2	5	2	1	4	2	1	3	1	4	4	1	1	1	1	1	1	1	1	1	1	1	1	1	66	LG+C20+F+G
OG0001410	2	2	1	1	1	1	1	1	3	1	4	1	1	2	3	1	2	3	5	1	3	1	2	1	1	2	1	3	1	1	1	1	1	1	1	2	2	1	1	1	1	66	LG+C40+F+G
OG0001411	1	6	2	2	1	1	2	1	1	1	1	1	2	3	2	1	1	1	5	2	1	1	4	1	2	1	2	1	2	1	1	1	1	2	1	1	1	1	1	2	1	66	JTT+F+R4
OG0001412	1	2	2	3	2	1	1	1	1	1	3	1	2	2	1	2	2	2	3	2	2	2	2	1	2	2	2	1	2	2	1	2	1	1	2	2	1	1	1	0	1	66	LG+C40+F+G
OG0001413	1	2	1	1	2	1	1	1	3	1	3	1	1	2	1	1	1	2	5	1	1	1	4	1	2	1	3	4	1	1	1	3	1	1	1	3	1	1	1	1	1	66	LG+C20+F+G
OG0001414	3	1	3	1	5	1	2	2	1	2	1	1	1	1	0	3	3	1	4	2	1	1	1	1	1	1	1	0	1	1	2	2	2	3	1	1	1	2	2	2	1	66	LG+C20+F+G
OG0001415	1	2	2	1	1	2	2	3	1	1	1	2	1	1	2	1	2	2	1	1	1	3	3	1	2	1	3	1	2	1	1	2	2	2	3	2	1	1	1	2	1	66	LG+C20+F+G
OG0001416	1	1	1	2	1	2	2	2	2	1	2	4	1	3	1	1	1	2	2	1	1	3	2	1	1	2	1	1	2	1	2	2	1	2	3	1	1	1	2	1	2	66	LG+C20+F+G
OG0001417	1	5	2	3	1	1	1	1	1	1	2	2	1	1	2	2	1	2	5	2	1	3	3	1	1	1	1	2	1	2	1	2	1	1	1	2	1	1	1	1	1	66	JTT+F+I+G4
OG0001418	1	5	1	1	1	1	1	1	1	1	2	1	1	1	2	2	1	2	3	2	2	4	3	1	2	0	1	2	1	1	1	1	1	1	1	6	2	1	1	2	1	66	LG+C20+F+G
OG0001419	1	2	2	2	1	1	2	1	1	1	0	1	2	4	1	2	4	3	2	5	1	1	0	2	1	0	2	1	2	2	1	1	1	1	1	1	1	1	1	6	1	66	LG+C30+F+G
OG0001420	2	1	1	3	1	1	2	3	3	2	1	1	1	2	3	1	1	2	2	1	1	3	2	2	2	1	2	1	2	1	2	1	2	1	2	1	1	1	1	2	1	66	JTT+F+I+G4
OG0001421	1	1	3	1	6	1	1	1	1	1	1	1	2	1	2	1	5	0	6	1	1	1	1	1	1	1	2	1	1	3	1	2	1	1	2	1	2	1	1	3	1	66	C60
OG0001422	1	2	1	3	1	1	1	1	3	2	1	1	2	3	3	0	1	2	5	1	1	1	1	1	3	2	4	0	1	1	1	1	1	5	1	1	1	1	1	2	1	66	LG+C30+F+G
OG0001423	1	3	2	4	1	1	1	1	1	1	1	1	1	2	1	1	2	3	6	2	0	1	2	1	2	2	2	1	2	1	1	1	2	2	3	2	1	1	1	1	1	66	JTT+F+I+G4
OG0001424	1	2	1	2	1	1	1	1	3	1	0	1	1	2	1	3	1	1	3	1	0	2	3	1	2	2	2	3	3	2	1	2	1	1	2	5	1	1	1	2	1	66	JTT+F+I+G4
OG0001425	1	5	1	1	1	0	1	1	4	1	4	1	1	2	1	1	1	2	5	1	1	4	4	1	1	1	1	4	1	1	1	1	1	1	1	2	1	1	1	1	1	66	LG+C20+F+G
OG0001426	1	3	2	2	1	1	4	1	2	1	4	1	1	2	2	1	2	2	4	3	1	3	3	2	1	1	1	0	1	1	1	1	1	2	1	1	1	1	1	1	1	66	LG+C20+F+G
OG0001427	1	1	1	1	1	1	2	3	0	2	1	1	1	3	2	4	1	0	4	2	0	1	1	2	1	1	0	4	1	2	3	1	4	1	0	5	1	1	1	1	3	66	LG+C40+F+G
OG0001428	1	4	1	4	0	1	1	1	1	1	2	1	1	3	1	1	1	2	5	3	3	2	4	1	2	1	2	1	2	1	1	1	1	1	1	2	1	1	1	1	1	66	LG+C20+F+G
OG0001429	1	2	1	3	2	2	1	1	1	1	2	1	1	5	1	1	1	1	4	1	1	4	3	1	1	1	3	3	1	2	1	3	1	1	0	2	1	1	1	1	1	66	LG+C20+F+G
OG0001430	1	6	1	1	1	1	1	1	1	1	4	1	1	3	1	1	1	2	3	2	1	3	4	1	2	1	1	1	2	1	1	1	1	1	4	1	1	1	1	2	1	66	LG+C20+F+G
OG0001431	1	2	2	0	3	1	1	1	1	1	1	1	1	3	0	1	2	0	2	5	2	2	3	1	1	2	2	1	4	2	1	3	1	1	3	2	1	1	1	2	1	66	LG+C20+F+G
OG0001432	2	6	1	1	1	1	3	1	1	1	2	3	1	1	1	1	1	2	4	0	3	3	4	2	1	2	1	0	1	1	1	1	2	1	1	3	1	1	1	1	1	66	JTT+F+G4
OG0001433	1	3	1	5	1	1	1	1	3	1	2	1	1	3	2	1	1	1	6	1	2	2	3	1	1	1	1	0	1	1	1	1	2	1	1	5	1	1	1	1	1	66	JTT+F+I+G4
OG0001434	1	3	1	1	2	1	1	1	3	1	2	1	3	3	2	1	1	1	2	2	2	2	2	1	3	1	1	2	2	0	1	1	1	1	5	2	1	1	1	2	1	66	LG+C20+F+G
OG0001435	0	6	2	4	3	0	0	0	0	0	1	1	3	1	0	4	1	5	4	5	3	0	3	0	2	2	2	3	2	1	0	1	0	0	1	3	1	0	0	2	0	66	LG4M
OG0001436	0	2	1	2	2	1	1	1	1	0	2	1	2	2	1	2	1	3	2	2	2	2	3	1	2	2	2	2	3	0	1	2	1	1	2	2	4	1	1	2	1	66	LG+C20+F+G
OG0001437	0	4	1	1	3	1	2	1	0	2	0	4	2	2	2	5	1	0	3	1	1	3	1	1	1	2	0	1	1	1	2	1	1	1	2	3	1	3	1	2	2	66	JTT+F+G4
OG0001438	0	0	0	0	0	16	19	1	2	2	0	0	0	0	0	0	0	1	1	0	1	0	0	1	0	0	0	0	0	0	3	0	0	3	0	0	0	0	4	0	12	66	JTT+F+I+G4
OG0001439	2	1	0	0	3	4	3	2	3	4	0	3	1	1	1	0	1	0	3	0	1	0	0	3	0	1	1	0	1	2	3	3	1	4	1	1	0	3	3	2	3	65	LG+C20+F+G
OG0001440	2	3	1	1	1	1	4	1	1	3	1	0	2	2	2	4	5	1	0	1	0	2	0	1	0	1	1	1	2	1	1	1	2	2	4	2	1	1	1	1	4	65	LG+C20+F+G
OG0001441	2	1	1	1	1	2	2	2	2	2	1	2	1	2	1	1	1	1	2	2	1	1	1	2	2	1	1	2	1	1	2	2	2	2	1	1	6	1	2	1	2	65	LG+C20+F+G
OG0001442	1	3	1	2	2	1	2	1	2	1	2	1	2	1	1	1	1	2	4	1	1	3	4	1	2	1	1	2	3	1	1	2	1	2	1	2	1	1	1	1	1	65	LG+C20+F+G
OG0001443	1	6	1	1	1	1	2	2	1	1	2	2	1	4	2	2	1	1	6	1	1	1	3	1	2	1	2	0	1	2	1	1	1	1	1	1	1	1	1	2	1	65	JTT+F+R4
OG0001444	4	2	1	0	2	1	3	5	0	3	0	1	4	0	2	1	3	0	1	1	0	0	0	4	1	0	1	3	2	1	2	3	2	1	1	3	1	3	1	1	1	65	LG+C10+F+G
OG0001445	3	1	1	1	1	2	2	1	1	2	3	2	1	2	1	1	1	2	5	1	1	4	2	1	2	1	1	1	1	1	1	1	3	1	1	1	2	1	3	1	1	65	LG+C20+F+G
OG0001446	2	1	1	2	1	0	2	1	1	0	2	1	1	2	1	3	1	2	3	3	3	3	1	2	1	2	2	1	1	1	1	3	1	2	3	2	1	1	1	1	1	64	LG+C20+F+G
OG0001447	2	0	1	4	1	5	0	1	0	5	2	0	2	0	0	4	0	3	1	3	0	1	0	0	1	1	2	1	6	2	0	1	2	0	2	5	1	2	3	1	0	65	LG+C20+F+G
OG0001448	1	7	1	2	2	1	1	1	4	1	3	1	1	2	1	1	3	1	3	2	3	3	2	1	1	1	1	1	1	1	1	1	1	1	1	2	1	1	1	0	1	65	LG+C20+F+G
OG0001449	1	2	1	2	1	0	1	3	1	1	2	2	1	3	1	1	1	1	5	2	2	1	3	1	1	1	1	3	1	1	1	1	1	3	1	1	1	1	2	2	3	64	JTT+F+G4
OG0001450	1	2	1	1	1	1	3	1	0	1	3	2	1	2	0	2	2	1	9	2	1	2	1	2	2	3	0	1	1	0	2	1	1	1	4	1	2	1	1	1	1	65	LG+C20+F+G
OG0001451	1	2	1	1	1	1	2	1	3	1	2	1	1	3	3	2	1	2	6	1	1	1	2	1	2	1	3	3	1	2	1	2	1	1	1	1	1	1	1	1	1	65	LG+C30+F+G
OG0001452	1	2	1	1	1	1	1	1	2	1	1	1	5	2	1	2	2	4	4	1	1	1	3	1	2	2	1	5	1	1	1	4	1	1	0	0	1	1	1	1	1	65	LG+C20+F+G
OG0001453	2	3	1	3	1	1	1	1	1	1	2	1	1	2	2	2	2	1	1	1	0	3	2	2	1	1	2	1	1	0	1	1	2	2	3	3	0	1	1	5	3	65	LG+C20+F+G
OG0001454	1	4	3	1	2	1	1	2	1	1	4	1	2	2	0	2	1	4	4	2	1	2	3	1	1	1	1	1	1	1	1	3	1	1	1	1	1	1	1	1	1	65	JTT+F+I+G4
OG0001455	1	5	1	1	1	1	1	1	2	1	3	2	1	1	1	3	1	1	7	1	1	2	4	1	1	1	1	1	3	1	1	1	2	1	1	1	1	1	1	2	1	65	LG+C20+F+G
OG0001456	1	4	1	3	1	1	1	1	1	1	1	1	2	1	1	1	1	0	7	1	2	0	2	1	1	4	2	2	4	1	1	1	3	1	1	0	1	1	1	2	3	65	LG+C20+F+G
OG0001457	1	2	1	2	2	1	3	1	1	1	1	1	1	1	2	1	2	1	6	2	1	3	3	1	1	1	3	3	1	1	1	1	1	4	1	1	1	1	1	1	1	65	LG+C20+F+G
OG0001458	1	2	1	1	2	1	2	2	2	2	1	1	1	1	1	1	1	2	3	3	3	3	2	1	1	2	0	2	2	1	2	1	1	2	2	3	1	1	1	2	1	65	JTT+F+I+G4
OG0001459	1	5	1	1	1	1	1	1	1	1	2	1	1	6	2	1	1	2	3	1	3	4	4	1	2	1	1	2	1	1	1	1	1	1	1	1	1	1	1	1	1	65	LG+C40+F+G
OG0001460	2	5	1	1	2	1	1	1	1	1	2	1	1	2	1	1	1	1	3	1	4	2	2	1	1	1	1	4	3	2	1	1	1	1	3	1	1	1	1	2	1	65	LG+C20+F+G
OG0001461	4	5	2	1	1	1	1	2	1	1	0	1	1	2	3	1	1	3	4	2	1	2	1	2	1	1	2	2	2	1	0	1	2	1	1	1	2	1	1	1	2	65	C60
OG0001462	1	5	3	1	1	1	1	1	4	1	2	1	1	1	3	1	1	1	4	1	1	4	1	1	2	1	2	3	1	1	1	1	1	1	2	1	1	1	1	2	1	65	LG+C50+F+G
OG0001463	2	0	1	1	1	4	5	3	1	2	0	0	3	1	0	4	1	1	4	1	0	1	4	0	1	3	2	0	2	1	2	2	2	3	1	0	1	1	1	3	0	65	JTT+F+I+G4
OG0001464	1	3	1	1	1	1	1	1	2	2	1	1	1	2	2	1	1	1	3	1	4	4	2	1	1	0	2	4	1	1	5	1	2	1	1	1	2	1	1	1	1	65	LG+C30+F+G
OG0001465	1	1	2	2	2	0	1	1	2	1	4	1	1	3	1	1	1	1	4	2	3	3	3	1	3	1	2	2	1	1	2	1	1	1	1	1	1	1	1	2	1	65	LG+C20+F+G
OG0001466	2	2	2	1	0	2	2	2	2	2	1	3	1	2	1	1	2	1	2	2	1	1	1	2	1	1	1	1	1	4	2	1	2	2	2	1	1	2	2	1	2	65	LG4X
OG0001467	1	2	1	1	2	1	1	1	3	1	1	1	1	3	2	1	1	2	5	1	3	3	4	1	2	1	2	3	1	2	1	1	1	1	1	1	1	1	1	1	1	65	LG+C40+F+G
OG0001468	1	7	1	1	1	1	1	1	1	1	3	1	1	3	3	1	1	3	3	2	1	3	3	1	1	1	2	1	1	1	1	1	1	1	1	1	2	1	1	2	1	65	LG+C20+F+G
OG0001469	1	4	1	1	1	1	1	1	3	1	2	1	1	5	1	1	2	3	2	4	1	2	2	1	3	2	1	0	2	1	1	1	2	1	1	1	2	1	1	1	1	65	JTT+F+I+G4
OG0001470	1	3	1	1	1	1	1	1	1	1	2	1	1	2	3	1	1	2	4	2	3	4	4	1	2	1	0	0	1	1	1	1	6	1	1	1	1	1	1	1	2	65	JTT+F+I+G4
OG0001471	1	3	1	1	1	1	1	1	3	1	3	3	1	1	1	1	2	2	7	1	1	4	4	1	1	2	2	0	2	1	1	1	1	1	1	1	1	1	1	1	1	65	JTT+F+I+G4
OG0001472	1	2	2	1	2	1	2	2	2	2	1	1	1	1	1	2	3	2	2	1	1	1	1	1	2	1	1	3	1	2	2	2	2	2	1	1	2	2	2	2	1	65	C60
OG0001473	1	7	1	1	2	1	1	2	1	1	2	2	1	2	3	1	1	1	3	1	2	2	4	1	1	1	3	1	1	1	1	1	1	3	1	1	1	1	1	1	1	65	LG+C20+F+G
OG0001474	1	1	1	1	6	1	3	3	3	2	1	1	1	1	1	1	1	1	9	1	1	0	1	1	2	0	2	1	1	1	2	1	2	2	1	1	1	2	2	0	1	65	LG+C20+F+G
OG0001475	2	5	1	2	1	1	1	1	0	1	1	2	1	3	1	3	1	1	3	1	0	2	1	1	4	2	1	1	3	3	1	1	2	1	1	3	0	1	1	3	1	65	JTT+F+I+G4
OG0001476	1	1	4	1	1	1	1	1	2	1	2	1	1	2	1	1	3	3	5	2	1	2	2	1	1	1	1	4	1	1	1	1	1	1	1	1	3	1	1	3	1	65	LG+C20+F+G
OG0001477	1	4	1	1	1	1	1	1	2	1	2	1	1	2	1	1	1	3	5	2	1	3	2	1	2	1	2	1	5	1	1	1	1	1	1	2	1	1	1	2	1	65	LG+C20+F+G
OG0001478	1	2	2	5	1	1	1	1	1	3	0	2	4	2	2	2	1	1	3	2	0	1	2	1	1	1	2	0	1	1	1	1	1	2	3	3	1	1	1	1	3	65	LG+C20+F+G
OG0001479	1	1	1	1	1	1	1	1	4	1	1	1	2	3	2	3	1	3	3	2	2	0	2	1	1	2	3	5	1	1	1	1	1	2	1	2	1	1	1	1	1	65	LG+C20+F+G
OG0001480	1	1	6	1	1	1	1	1	2	1	1	1	1	2	1	1	2	1	6	1	1	4	2	1	1	3	2	2	1	1	2	1	1	1	1	1	1	1	1	2	2	65	JTT+F+I+G4
OG0001481	1	5	3	3	1	1	1	1	2	2	1	2	2	2	3	1	1	0	4	1	2	1	2	1	2	2	0	3	1	3	1	1	1	1	1	1	1	1	1	1	1	65	JTT+F+I+G4
OG0001482	2	1	1	1	1	1	2	2	2	2	1	1	1	1	1	1	2	1	5	3	1	1	1	2	1	1	1	0	1	3	2	1	2	2	1	1	3	2	2	4	1	65	LG+C20+F+G
OG0001483	1	5	1	3	2	1	1	1	2	1	1	1	1	3	3	1	1	4	6	2	1	1	3	1	1	0	1	2	1	3	1	1	2	1	0	0	1	1	1	1	1	65	LG+C30+F+G
OG0001484	1	2	1	3	1	1	1	1	1	2	3	1	1	4	2	1	1	1	6	3	1	1	3	1	2	1	1	4	1	1	1	1	1	1	1	2	1	1	1	1	1	65	LG+C20+F+G
OG0001485	1	3	2	1	2	2	1	1	2	1	1	2	3	2	1	2	1	1	1	0	4	1	1	1	1	1	0	3	2	1	1	6	1	2	1	2	1	1	3	1	1	65	JTT+F+G4
OG0001486	1	2	1	1	2	1	1	1	4	1	2	1	1	2	2	1	1	2	7	2	2	1	3	2	1	1	2	1	1	1	1	1	2	1	1	1	1	2	1	2	1	65	LG+C20+F+G
OG0001487	1	6	1	1	1	1	1	1	2	1	2	1	1	2	2	1	1	1	4	2	1	1	4	1	1	5	1	2	1	1	1	2	1	1	3	2	1	1	1	0	1	65	LG+C40+F+G
OG0001488	1	3	1	1	1	1	2	1	1	1	3	1	1	2	1	1	1	2	4	3	1	2	6	1	2	2	2	1	1	1	1	1	1	1	1	4	1	1	1	1	1	65	LG+C40+F+G
OG0001489	1	4	3	1	1	1	1	1	1	1	2	1	1	2	1	2	4	2	2	3	1	2	4	1	2	2	1	4	1	1	1	1	1	1	1	1	1	1	1	1	1	65	LG+C40+F+G
OG0001490	1	1	2	1	1	2	2	1	2	4	1	2	1	1	1	1	1	1	3	2	1	3	1	1	1	1	4	1	1	2	2	2	2	2	1	1	1	2	2	1	2	65	JTT+F+I+G4
OG0001491	1	2	2	2	2	1	1	1	1	1	3	1	1	3	2	1	1	2	3	2	1	4	4	1	1	1	2	1	1	1	1	1	1	1	1	3	1	1	1	3	1	65	JTT+F+I+G4
OG0001492	1	1	1	1	2	1	1	1	1	2	1	1	4	2	1	3	1	1	1	1	4	1	1	1	1	3	0	0	2	0	1	1	1	2	3	3	2	2	2	4	3	65	JTT+F+R4
OG0001493	1	5	2	1	3	1	1	1	1	1	4	1	2	2	2	1	1	1	6	2	1	2	1	1	2	2	1	0	3	1	1	1	1	1	2	1	1	1	1	1	1	65	JTT+F+I+G4
OG0001494	1	6	1	1	1	1	1	1	1	1	1	2	1	2	2	1	1	1	4	1	2	2	5	1	2	1	1	5	1	1	1	1	1	1	2	2	1	1	1	1	1	65	LG+C40+F+G
OG0001495	1	0	3	2	1	1	5	4	0	2	1	1	5	1	2	0	1	1	5	1	1	0	4	1	1	0	2	0	2	1	1	1	2	2	4	1	1	1	1	1	1	65	JTT+F+R4
OG0001496	1	5	2	2	1	2	1	1	0	1	3	1	1	1	1	1	1	2	8	0	1	6	3	1	1	1	2	0	3	1	1	1	1	2	1	1	1	1	1	0	1	65	JTT+F+R4
OG0001497	1	2	1	2	3	1	1	1	5	1	1	1	1	4	2	1	1	2	3	1	1	4	1	1	1	3	1	3	1	1	2	1	1	2	1	1	1	1	1	1	1	65	LG+C20+F+G
OG0001498	1	4	2	2	0	1	1	1	1	1	0	1	1	0	2	1	3	2	7	2	3	4	5	1	1	1	2	2	1	1	1	1	1	1	1	1	1	1	1	1	1	65	LG+C20+F+G
OG0001499	1	0	1	3	2	1	2	1	1	1	2	1	1	1	4	3	1	2	7	1	1	0	3	1	2	2	0	2	3	1	1	1	1	1	2	2	1	1	1	1	2	65	LG+C20+F+G
OG0001500	1	5	2	3	2	1	1	1	2	1	2	2	1	2	2	1	1	1	2	1	1	1	3	1	1	3	1	0	1	1	1	1	1	2	3	4	1	1	1	2	1	65	LG+C20+F+G
OG0001501	1	3	2	1	1	1	1	1	1	1	5	1	3	1	1	1	1	1	2	1	2	3	2	1	1	0	1	2	2	1	1	1	1	1	3	2	7	1	1	1	1	65	LG+C20+F+G
OG0001502	0	5	0	0	0	0	0	0	0	0	0	0	21	1	1	0	0	0	0	0	0	8	1	0	0	4	0	0	11	0	0	0	0	0	10	3	0	0	0	0	0	65	JTT+F+G4
OG0001503	0	3	2	1	2	2	1	1	1	3	2	1	3	1	1	1	3	1	3	1	2	0	0	1	2	2	2	2	3	1	1	2	2	1	2	2	2	1	2	2	0	65	JTT+F+I+G4
OG0001504	0	3	1	1	2	0	0	0	0	0	2	2	7	2	0	0	1	1	4	1	2	2	1	0	0	1	1	20	1	1	0	1	0	0	3	3	1	0	0	1	0	65	LG+C10+F+G
OG0001505	1	3	1	1	1	0	1	1	2	1	2	1	2	1	1	3	7	2	3	1	1	2	1	2	1	2	1	2	3	1	1	0	1	1	2	3	1	1	1	1	1	64	JTT+F+I+G4
OG0001506	1	2	1	2	1	1	3	1	1	1	1	1	3	3	2	2	1	2	4	1	1	0	1	5	1	1	2	1	1	1	1	1	1	1	4	3	1	1	1	1	1	64	LG+C10+F+G
OG0001507	2	2	1	1	2	2	2	2	2	2	1	2	1	1	0	2	1	1	5	1	1	1	1	2	1	1	1	2	2	2	2	2	2	2	1	1	1	2	2	0	2	64	LG4X
OG0001508	1	4	1	4	1	1	1	1	1	1	1	1	2	3	2	3	1	2	2	0	10	0	1	1	4	0	1	0	3	1	1	1	1	1	1	0	1	1	1	1	1	64	LG+C40+F+G
OG0001509	3	1	1	0	1	2	2	3	5	3	0	3	0	1	1	3	1	0	0	2	0	0	1	3	1	3	0	3	3	0	1	2	2	2	0	3	1	1	1	2	3	64	LG+C20+F+G
OG0001510	2	2	3	2	4	1	1	3	2	2	1	1	1	1	1	0	1	2	1	2	4	0	0	1	2	1	0	1	1	1	1	2	3	3	1	2	1	2	2	1	2	64	JTT+F+G4
OG0001511	1	1	1	2	1	1	2	2	2	1	1	2	1	3	2	1	1	3	2	1	2	6	3	1	1	1	1	2	2	1	1	1	1	1	3	1	1	1	1	1	1	64	LG+C20+F+G
OG0001512	5	0	1	2	1	1	1	2	0	2	0	1	3	0	0	1	3	2	4	1	1	4	0	1	1	1	0	1	1	2	5	1	1	1	3	3	1	1	1	1	4	64	JTT+F+I+G4
OG0001513	1	3	1	3	2	1	2	1	3	1	2	1	1	3	3	1	1	1	4	3	1	3	1	1	2	3	1	0	1	1	1	1	1	1	1	3	1	0	1	1	1	64	LG+C30+F+G
OG0001514	2	1	1	2	1	1	2	2	1	1	2	1	2	1	2	2	1	2	4	2	1	2	0	1	3	1	0	2	3	2	1	1	3	1	3	2	1	1	1	1	1	64	LG+C10+F+G
OG0001515	1	5	1	1	2	1	2	1	2	1	3	1	1	2	1	1	1	1	3	1	1	5	1	1	2	1	1	1	1	1	1	1	1	3	1	2	1	1	1	1	4	64	LG+C20+F+G
OG0001516	1	3	2	1	1	1	1	1	4	1	3	1	1	1	1	3	1	2	4	3	1	2	2	1	2	3	1	1	1	1	1	1	1	1	3	1	1	1	1	1	1	64	JTT+F+G4
OG0001517	1	1	0	2	1	1	1	1	1	1	1	1	1	1	2	1	1	1	1	1	6	4	6	1	1	1	1	2	2	1	1	1	1	1	2	1	7	1	1	1	1	64	LG+C20+F+G
OG0001518	1	3	2	1	1	1	1	3	2	2	1	1	2	1	1	2	3	0	1	1	2	2	2	1	1	1	0	1	3	3	2	5	2	1	1	2	1	1	1	1	1	64	LG4X
OG0001519	1	6	1	2	1	1	1	4	1	1	1	1	2	1	1	1	1	1	3	1	3	1	2	1	1	1	1	1	2	1	1	2	1	1	2	2	4	1	1	1	2	64	LG+C30+F+G
OG0001520	1	5	2	1	4	1	1	1	3	1	1	1	1	4	1	1	0	3	3	1	2	1	4	1	1	1	1	1	1	1	1	2	1	1	3	1	1	1	1	1	1	64	JTT+F+G4
OG0001521	1	3	2	1	1	1	1	1	3	1	2	1	2	3	3	2	1	3	4	1	0	2	1	1	2	3	2	1	1	1	1	1	1	1	1	3	1	1	1	1	1	64	LG+C20+F+G
OG0001522	1	4	1	1	3	1	1	1	2	1	2	1	1	3	1	1	2	3	3	1	2	2	2	1	2	1	3	2	1	1	1	1	2	1	1	1	2	1	1	1	1	64	LG+C20+F+G
OG0001523	1	3	1	2	1	1	1	1	1	1	1	1	1	1	2	1	1	2	5	1	2	1	1	1	2	3	2	1	1	2	1	1	2	1	3	4	1	1	3	1	1	64	JTT+F+I+G4
OG0001524	1	3	1	2	1	1	1	1	3	1	2	1	1	2	1	1	1	3	4	1	1	3	3	1	2	2	3	1	1	3	1	2	1	1	1	1	1	1	1	1	1	64	LG+C20+F+G
OG0001525	1	1	1	0	2	1	1	1	2	0	1	1	1	1	5	2	1	1	3	1	1	2	2	1	2	1	2	8	1	1	1	1	1	1	1	1	4	1	1	3	1	64	LG+C40+F+G
OG0001526	1	1	2	1	2	1	1	1	2	1	2	1	1	2	2	1	1	2	5	2	5	3	4	1	1	1	1	1	2	1	1	1	1	1	1	1	1	1	2	1	1	64	LG+C20+F+G
OG0001527	1	6	1	2	1	1	2	2	2	1	2	1	1	4	1	1	1	1	4	2	1	4	1	1	2	1	2	0	1	1	1	1	1	1	2	1	1	1	2	1	1	64	LG+C20+F+G
OG0001528	1	3	2	3	1	1	1	2	2	1	2	1	1	2	1	1	1	3	2	2	2	4	5	1	1	1	1	1	1	1	1	1	1	1	2	1	1	1	1	1	1	63	JTT+F+I+G4
OG0001529	5	9	1	1	1	1	1	1	0	1	2	1	1	1	4	1	1	4	7	1	3	1	1	1	1	1	1	0	1	1	1	1	0	1	1	1	1	1	1	1	0	64	JTT+F+I+G4
OG0001530	2	2	2	1	1	3	4	2	2	2	2	3	1	1	1	1	1	1	1	1	1	1	1	3	1	1	1	1	1	1	2	1	2	3	1	1	1	2	2	1	2	64	JTT+F+I+G4
OG0001531	4	1	1	1	2	2	3	2	3	3	1	1	1	1	1	1	1	1	1	1	1	1	1	2	1	0	1	0	1	2	3	1	3	3	1	2	1	2	3	1	2	64	LG+C10+F+G
OG0001532	1	2	1	1	2	1	1	4	2	1	3	1	1	2	2	1	2	1	2	1	0	3	1	1	2	1	1	1	3	1	2	1	1	1	1	3	2	1	1	2	3	64	LG+C40+F+G
OG0001533	1	0	1	1	2	1	1	1	0	0	2	1	1	1	3	2	2	1	3	1	0	3	0	3	1	3	1	1	2	1	1	1	3	4	2	5	1	4	1	1	1	64	JTT+F+I+G4
OG0001534	2	1	1	2	1	2	3	1	3	2	1	1	0	1	1	2	2	1	4	1	1	1	1	1	2	0	1	1	1	1	3	1	2	3	1	1	2	4	2	1	2	64	LG+C30+F+G
OG0001535	1	1	2	1	1	1	3	2	2	2	1	1	1	1	2	1	2	1	3	1	1	1	2	1	1	1	0	1	3	2	4	2	2	2	3	1	2	2	2	0	1	64	C60
OG0001536	2	1	2	1	2	1	1	1	1	2	1	2	1	3	1	1	3	1	1	3	1	0	2	3	2	1	0	2	2	2	0	2	3	1	1	2	3	1	2	2	1	64	LG+C10+F+G
OG0001537	1	2	3	2	1	2	1	1	1	2	1	2	2	1	1	1	2	1	2	2	1	0	0	1	1	2	2	2	2	2	2	3	1	2	2	2	2	1	2	1	2	64	LG4X
OG0001538	1	6	1	3	1	1	1	1	1	0	1	3	1	3	3	1	1	0	5	2	0	1	1	1	2	4	2	1	1	1	1	1	2	1	1	0	1	1	1	1	4	64	LG+C20+F+G
OG0001539	2	2	2	2	2	2	3	2	2	2	1	1	1	1	2	1	2	2	4	1	1	1	1	2	1	1	1	0	1	1	2	2	2	2	0	0	2	1	2	2	2	64	LG+C40+F+G
OG0001540	2	5	3	1	1	4	4	2	1	1	2	3	1	0	0	2	2	3	0	1	0	1	2	2	0	1	2	0	1	1	1	1	2	4	1	0	2	1	1	2	1	64	JTT+F+R3
OG0001541	1	4	1	1	2	0	0	1	1	1	1	1	1	3	0	2	1	3	5	4	1	2	2	1	2	1	1	2	1	1	1	1	1	3	1	1	2	2	1	1	3	64	LG+C20+F+G
OG0001542	1	4	2	3	1	1	1	1	1	1	4	1	2	2	1	1	1	1	2	3	3	1	2	0	1	3	1	2	4	1	2	1	1	1	2	1	1	1	1	0	1	64	LG+C20+F+G
OG0001543	1	4	2	2	1	1	1	2	1	1	1	1	1	1	1	1	1	2	6	1	1	5	4	1	1	4	0	1	1	1	1	1	1	2	0	3	1	1	1	1	1	64	JTT+F+I+G4
OG0001544	1	3	1	1	1	2	0	4	0	5	1	3	1	1	2	3	1	0	1	3	0	2	0	0	2	3	1	4	2	2	1	1	3	0	0	0	1	1	5	2	0	64	LG+C30+F+G
OG0001545	1	3	1	2	1	1	1	1	3	1	2	1	2	2	2	2	1	3	3	1	1	1	1	1	2	3	3	1	3	1	1	2	1	2	1	1	1	1	1	1	1	64	JTT+F+I+G4
OG0001546	1	5	2	2	2	1	1	1	2	1	0	1	2	1	1	1	1	3	7	1	1	2	3	1	1	1	2	0	1	1	1	2	2	2	1	1	1	1	1	2	1	64	JTT+F+I+G4
OG0001547	1	0	4	2	2	1	1	1	0	1	0	2	1	2	1	1	1	0	4	4	1	1	0	2	2	2	0	2	3	2	2	4	1	1	3	2	2	2	1	1	1	64	JTT+F+I+G4
OG0001548	2	4	1	1	2	1	1	1	1	1	1	1	1	1	0	3	3	1	5	1	0	4	2	1	1	2	1	5	1	2	1	2	3	1	1	0	1	1	1	1	1	64	LG+C20+F+G
OG0001549	2	2	6	1	4	9	2	3	1	2	0	0	3	0	0	1	1	1	0	0	2	0	0	1	1	0	2	0	2	1	5	0	1	2	2	2	0	3	1	0	1	64	JTT+F+I+G4
OG0001550	1	5	1	2	2	1	1	2	3	2	3	1	3	1	1	1	1	0	5	2	0	2	0	1	1	1	1	1	1	1	1	3	1	1	1	2	2	1	1	3	1	64	LG+C20+F+G
OG0001551	1	2	1	3	2	1	4	1	1	1	3	2	1	3	0	1	1	2	3	1	3	0	1	1	2	5	1	0	2	1	1	1	1	3	1	3	1	1	1	0	1	64	JTT+F+I+G4
OG0001552	2	1	1	2	2	1	4	1	1	1	2	1	1	2	1	1	1	1	6	1	1	3	3	1	2	1	1	0	1	1	1	1	2	2	2	3	1	1	1	1	1	63	JTT+F+R4
OG0001553	3	5	2	0	1	2	2	2	0	3	0	1	1	1	2	3	3	1	0	2	0	0	0	3	1	1	0	3	1	1	2	3	1	3	1	1	2	2	1	1	3	64	LG+C20+F+G
OG0001554	1	2	1	1	1	2	3	3	2	1	2	2	1	2	1	1	1	1	6	1	1	2	4	1	3	1	1	1	1	1	2	1	1	1	1	1	1	1	1	2	1	64	JTT+F+I+G4
OG0001555	1	1	1	3	2	1	2	2	1	3	1	1	2	1	2	1	1	2	2	1	3	3	3	1	1	1	1	1	2	1	1	1	1	2	4	1	1	1	2	1	1	64	LG+C20+F+G
OG0001556	1	1	1	1	2	1	1	1	2	1	2	1	1	2	1	1	1	2	3	2	2	5	5	1	2	1	1	1	1	1	1	4	1	1	1	3	1	1	1	1	1	64	LG+C20+F+G
OG0001557	1	1	2	1	1	1	3	1	2	2	1	1	2	1	2	0	1	1	1	1	3	2	3	1	3	1	1	2	2	1	2	2	2	2	2	1	1	2	2	2	1	64	LG+C20+F+G
OG0001558	1	6	2	3	0	1	2	1	3	1	1	2	1	4	1	1	1	2	3	1	1	2	4	1	1	1	1	2	3	1	1	1	1	1	1	0	1	1	1	1	1	64	LG+C30+F+G
OG0001559	1	3	3	2	0	1	1	1	4	1	1	3	1	1	3	1	2	1	2	0	1	1	1	1	1	2	1	0	4	1	1	5	3	1	1	2	1	1	1	2	1	64	JTT+F+G4
OG0001560	1	1	1	3	1	2	3	1	0	1	2	1	2	3	1	2	1	1	4	1	0	1	1	1	2	1	1	0	3	1	1	2	3	2	3	2	2	1	1	3	1	64	JTT+F+I+G4
OG0001561	1	2	1	2	1	1	3	1	1	1	2	2	1	4	3	2	1	2	4	2	2	3	4	1	1	2	0	0	1	1	1	1	1	1	1	2	1	1	1	1	1	64	JTT+F+I+G4
OG0001562	1	2	1	2	3	1	1	3	1	1	0	1	2	1	1	1	1	0	5	1	1	1	4	1	1	1	2	1	2	2	1	2	1	1	1	2	6	1	1	2	1	64	LG+C20+F+G
OG0001563	1	3	2	0	4	1	4	1	4	1	0	1	0	0	0	3	1	0	3	3	0	0	0	1	2	1	1	6	3	3	1	1	1	4	0	0	1	1	1	1	4	64	LG+C20+F+G
OG0001564	1	3	1	1	1	1	1	1	2	1	1	1	1	2	3	1	1	3	2	1	1	4	2	1	2	2	4	1	2	2	1	1	1	1	1	4	1	1	1	1	1	64	LG+C20+F+G
OG0001565	1	0	5	1	1	1	5	2	0	3	0	5	1	1	1	0	2	1	0	2	1	0	0	1	1	2	1	0	2	1	3	1	1	2	7	1	2	2	2	1	1	64	LG+C20+F+G
OG0001566	1	2	1	2	1	1	2	1	0	2	1	1	1	2	2	3	1	1	6	1	1	0	1	2	2	4	2	0	2	1	1	2	2	1	1	4	2	1	1	1	1	64	LG+C30+F+G
OG0001567	0	9	0	3	0	0	0	0	0	0	1	1	1	3	2	3	1	4	6	3	1	5	4	0	1	4	1	0	2	1	0	1	0	0	1	1	1	0	0	4	0	64	LG+C20+F+G
OG0001568	0	11	4	2	0	0	0	0	0	0	2	0	23	0	0	0	0	0	0	0	7	0	0	0	0	2	0	1	2	0	0	0	0	0	1	7	1	0	0	1	0	64	LG+C40+F+G
OG0001569	0	5	6	0	1	2	2	0	1	1	1	1	0	0	1	3	3	6	1	0	0	1	0	0	2	4	1	0	3	2	0	1	1	0	4	2	8	0	0	1	0	64	LG+C10+F+G
OG0001570	0	0	10	0	3	3	0	0	0	0	0	0	8	1	0	1	0	0	0	1	1	0	0	0	4	0	0	1	0	1	0	2	0	0	0	0	19	0	0	9	0	64	LG+C30+F+G
OG0001571	3	0	1	0	1	1	4	3	0	2	0	1	0	4	2	1	1	0	6	2	0	0	0	6	1	1	0	1	4	1	2	1	4	2	1	0	1	1	2	1	2	63	JTT+F+G4
OG0001572	1	0	3	1	2	2	1	8	1	1	3	1	1	2	1	1	2	1	2	1	1	0	0	1	1	2	3	1	1	2	1	4	2	1	1	0	1	1	1	3	1	63	LG+C30+F+G
OG0001573	1	4	1	1	1	1	1	1	2	1	1	1	1	2	1	1	1	2	6	1	2	3	3	1	2	2	2	3	2	1	1	1	1	1	1	1	1	1	1	1	1	63	LG+C40+F+G
OG0001574	1	2	2	1	3	1	2	2	1	2	3	1	2	2	1	2	2	1	2	1	1	1	1	1	1	1	1	1	1	2	2	2	2	2	1	1	1	2	2	2	1	63	LG+C40+F+G
OG0001575	1	3	1	2	2	1	2	1	2	1	2	1	1	3	1	1	1	2	2	2	1	1	4	1	1	2	1	1	1	1	1	2	1	2	1	4	2	1	1	1	1	63	LG+C20+F+G
OG0001576	1	4	1	3	1	1	1	1	2	1	2	1	1	2	1	2	1	1	4	1	1	1	1	1	1	2	2	1	1	2	1	1	2	1	4	3	0	1	2	2	1	63	JTT+F+I+G4
OG0001577	1	1	3	1	1	2	2	2	3	2	0	1	1	1	1	1	2	1	2	2	2	2	1	1	1	1	1	1	1	2	2	3	2	2	1	1	3	2	2	1	1	63	LG+C10+F+G
OG0001578	1	1	2	1	5	1	0	1	1	3	1	0	2	4	0	3	2	4	1	4	1	0	1	1	0	2	2	0	2	3	1	2	2	0	2	0	1	1	2	1	2	63	LG+C20+F+G
OG0001579	1	4	2	1	1	1	1	1	2	1	1	1	2	2	2	1	1	3	3	1	1	4	2	1	2	1	2	1	3	1	1	1	2	2	1	1	1	1	1	1	1	63	JTT+F+I+G4
OG0001580	3	0	2	4	1	1	1	2	0	3	2	1	0	1	3	1	1	1	2	1	1	1	0	4	1	2	0	1	2	1	2	2	1	1	4	5	1	1	1	1	1	63	LG+C20+F+G
OG0001581	1	1	1	1	1	1	1	1	4	1	2	2	1	2	1	2	1	1	4	1	2	4	3	1	3	1	2	3	1	2	1	1	1	1	1	1	1	1	1	1	1	63	LG+C20+F+G
OG0001582	2	4	2	1	2	1	2	2	3	2	2	1	1	2	2	1	0	1	5	1	0	3	1	0	1	2	3	1	2	1	1	1	3	1	0	1	1	1	1	1	1	63	LG+C20+F+G
OG0001583	1	2	1	1	1	1	2	3	1	2	3	1	1	1	1	2	1	1	2	2	1	1	1	1	1	1	1	1	2	4	2	4	1	1	2	2	2	1	2	0	2	63	LG+C20+F+G
OG0001584	1	4	1	1	1	1	1	1	3	1	2	1	1	3	3	1	1	1	6	0	3	1	1	1	1	1	2	4	1	1	1	1	1	1	2	1	2	1	1	1	1	63	LG+C30+F+G
OG0001585	1	1	1	1	1	1	1	1	3	1	2	1	1	2	2	1	1	1	4	2	2	4	2	1	2	1	0	4	1	2	1	2	1	1	1	3	1	1	1	2	1	63	JTT+F+I+G4
OG0001586	1	3	1	2	0	1	1	2	3	0	5	3	1	1	1	0	0	2	7	1	0	2	5	1	3	2	1	1	1	0	2	0	1	2	1	4	0	1	1	0	0	63	JTT+F+G4
OG0001587	2	0	1	3	1	3	5	2	1	3	0	1	2	1	1	1	1	2	7	1	0	2	2	3	1	2	1	1	0	1	2	1	1	4	0	0	1	1	1	0	1	63	JTT+F+R4
OG0001588	1	1	1	2	2	1	1	2	1	1	1	1	1	2	1	2	2	2	1	1	1	3	6	1	2	3	1	2	3	1	1	1	1	1	2	2	1	1	0	1	2	63	C60
OG0001589	1	4	2	1	1	2	1	1	1	1	2	1	1	2	1	1	1	4	9	1	1	3	2	1	1	1	2	1	1	1	1	1	1	1	1	1	1	1	1	1	1	63	LG+C20+F+G
OG0001590	1	3	1	1	1	1	1	1	3	1	1	1	1	3	1	3	2	3	3	2	1	4	1	1	2	2	1	0	2	1	1	1	1	3	1	1	1	1	1	2	1	63	JTT+F+I+G4
OG0001591	1	3	1	1	0	1	2	1	2	1	3	2	1	2	1	4	1	3	3	2	1	1	2	1	2	1	0	2	1	1	2	1	1	1	3	3	1	1	1	1	1	63	LG+C20+F+G
OG0001592	1	3	2	1	2	1	1	2	2	3	2	2	1	1	1	1	2	1	6	1	1	2	0	1	2	1	1	1	1	2	2	0	1	2	1	1	1	1	2	2	2	63	LG+C20+F+G
OG0001593	1	5	1	1	1	1	1	1	4	1	3	1	1	1	1	1	1	2	3	2	1	5	4	1	2	1	1	0	2	2	1	1	1	1	1	1	1	1	1	1	1	63	LG+C20+F+G
OG0001594	1	4	1	3	2	2	1	1	2	1	2	1	1	1	2	1	1	3	3	2	1	0	0	1	1	1	1	3	2	1	1	2	1	1	2	5	1	1	1	1	1	63	LG+C20+F+G
OG0001595	1	5	1	3	1	1	1	1	1	1	3	1	1	4	0	2	1	1	3	1	1	3	0	1	3	2	2	1	3	1	1	1	1	1	1	3	1	1	1	1	1	63	JTT+F+I+G4
OG0001596	1	2	2	1	1	1	1	1	2	1	3	1	1	4	1	1	1	1	5	1	2	2	6	1	1	1	4	1	1	1	1	1	1	1	1	1	1	1	1	1	1	63	LG+C20+F+G
OG0001597	1	1	1	1	2	2	2	1	0	1	1	1	2	1	1	1	1	1	5	1	0	3	2	2	1	2	1	4	3	1	2	1	1	2	1	3	1	1	1	2	2	63	LG+C20+F+G
OG0001598	1	2	2	1	2	1	3	2	1	2	2	2	1	1	1	1	2	2	3	2	1	1	3	1	1	1	1	0	0	2	2	2	2	1	0	2	2	1	2	1	3	63	LG+C10+F+G
OG0001599	1	1	2	1	2	1	2	1	2	1	1	2	1	1	2	1	3	1	1	1	1	1	1	2	1	1	1	1	1	2	2	5	1	2	1	1	2	2	2	3	2	63	LG+C30+F+G
OG0001600	1	0	1	3	1	1	1	1	0	1	3	1	4	3	1	3	3	1	5	3	2	0	0	1	1	5	1	1	2	1	1	1	1	1	2	1	1	1	1	1	1	63	LG+C20+F+G
OG0001601	2	1	1	1	1	1	3	1	2	2	1	1	1	1	1	2	4	1	5	2	1	1	1	1	0	1	1	5	0	1	1	2	1	2	1	1	2	1	2	2	2	63	LG+C20+F+G
OG0001602	1	4	1	1	1	1	1	1	1	1	2	1	1	4	1	1	1	2	4	2	1	4	2	1	1	3	1	0	1	1	1	1	1	1	1	5	1	1	1	2	1	63	JTT+F+I+G4
OG0001603	2	2	2	1	2	1	3	1	1	2	1	1	1	0	0	1	3	1	3	2	0	0	0	1	2	1	1	0	3	2	1	2	3	1	1	1	2	2	2	2	6	63	JTT+F+I+G4
OG0001604	1	1	1	1	1	2	2	1	5	2	2	1	1	2	1	1	1	1	3	1	3	1	1	1	1	1	2	1	1	3	1	1	1	2	1	1	1	2	2	3	2	63	JTT+F+G4
OG0001605	1	2	1	1	2	1	1	1	1	1	1	1	1	3	1	1	1	1	3	2	1	5	3	1	1	0	1	4	2	1	1	1	1	1	6	2	1	1	1	1	1	63	JTT+F+R5
OG0001606	1	2	3	2	2	1	1	1	2	1	1	1	1	1	2	1	2	0	6	1	1	1	2	1	2	1	2	1	1	3	1	2	1	2	1	1	1	1	2	3	1	63	LG+C20+F+G
OG0001607	1	2	2	2	2	0	1	2	1	2	1	1	2	2	0	2	3	1	2	1	1	1	1	1	1	2	2	1	2	1	2	3	2	1	2	3	2	0	2	2	1	63	LG+C10+F+G
OG0001608	1	3	1	2	1	1	1	1	4	1	2	1	1	4	1	1	1	1	5	1	1	3	4	1	2	1	2	1	2	1	1	1	1	1	1	1	1	1	1	1	1	63	LG+C20+F+G
OG0001609	1	4	1	1	1	1	1	1	5	1	2	1	1	2	1	1	1	3	2	1	4	2	5	1	2	1	1	0	1	1	1	1	1	3	1	1	1	1	1	1	1	63	JTT+F+I+G4
OG0001610	1	0	1	1	1	1	2	2	2	2	2	2	3	3	1	1	1	2	1	2	0	1	1	1	2	1	0	0	1	1	3	2	2	3	4	3	1	3	2	1	0	63	JTT+F+I+G4
OG0001611	1	2	1	1	2	1	2	1	1	2	0	2	2	1	2	3	1	1	3	3	1	3	1	2	3	2	2	1	1	2	2	1	2	1	1	1	1	1	1	1	1	63	LG+C10+F+G
OG0001612	1	2	1	1	1	1	2	2	2	1	1	1	1	0	1	3	1	2	4	2	1	2	3	2	1	2	1	0	1	1	1	3	4	1	1	2	1	2	1	1	2	63	JTT+F+I+G4
OG0001613	1	2	1	2	1	1	1	1	1	1	3	1	2	1	0	1	1	1	6	1	3	4	2	1	2	2	2	0	2	2	1	1	1	1	2	2	1	1	1	2	1	63	JTT+F+R5
OG0001614	1	1	2	2	1	1	1	1	1	1	1	1	1	2	3	1	1	2	2	0	2	4	4	1	1	1	1	1	4	2	1	2	1	1	2	2	3	1	1	1	1	63	C60
OG0001615	0	2	4	0	0	0	0	0	0	0	1	0	0	1	7	2	1	0	9	0	5	1	1	0	1	5	0	0	7	0	0	2	0	0	4	9	1	0	0	0	0	63	JTT+F+R3
OG0001616	0	3	0	2	1	3	5	0	0	3	0	10	4	5	2	0	0	0	8	3	0	0	0	0	3	1	0	0	0	0	0	0	0	1	0	4	0	0	2	3	0	63	LG+C10+F+G
OG0001617	0	2	1	1	2	0	0	0	0	0	4	0	2	3	2	11	2	5	4	0	0	1	3	0	3	0	2	0	2	1	0	1	0	0	0	6	2	0	0	3	0	63	LG+C30+F+G
OG0001618	0	0	63	0	0	0	0	0	0	0	0	0	0	0	0	0	0	0	0	0	0	0	0	0	0	0	0	0	0	0	0	0	0	0	0	0	0	0	0	0	0	63	JTT+F+R4
OG0001619	2	0	1	4	2	2	1	1	3	2	0	3	3	1	1	4	1	3	1	2	0	0	0	1	2	5	1	1	0	1	1	3	2	2	0	0	1	1	1	1	2	62	JTT+F+I+G4
OG0001620	2	0	3	0	1	0	3	1	1	1	0	4	3	0	5	4	2	0	4	5	0	0	0	0	0	0	0	1	0	0	3	1	2	7	2	0	1	1	1	4	0	62	LG+C10+F+G
OG0001621	1	5	1	1	3	1	1	1	1	1	3	1	1	2	1	1	1	3	2	1	1	2	4	1	1	1	1	2	4	1	1	1	1	1	1	2	1	1	1	1	1	62	LG+C40+F+G
OG0001622	1	1	1	3	2	2	4	3	1	1	2	1	1	2	1	1	1	1	6	2	1	0	1	1	2	1	2	1	1	1	1	1	1	1	1	4	1	1	1	1	1	62	LG+C20+F+G
OG0001623	2	2	2	0	2	1	1	2	1	1	0	2	0	0	2	1	2	2	2	1	0	1	1	2	2	1	1	4	1	2	2	3	2	1	2	1	2	3	1	2	2	62	JTT+F+G4
OG0001624	3	4	3	2	1	1	1	2	0	3	0	3	1	2	0	3	1	1	2	3	0	0	0	1	0	3	1	2	1	2	2	1	3	2	2	1	1	1	1	1	1	62	LG+C10+F+G
OG0001625	1	5	5	1	1	1	2	1	3	1	1	1	1	1	1	3	1	2	5	1	2	2	1	1	1	1	3	0	1	1	1	1	1	1	1	1	1	1	1	1	1	62	JTT+F+I+G4
OG0001626	2	1	1	1	2	2	2	2	2	2	1	1	1	1	1	1	2	2	2	2	2	1	1	2	1	1	2	1	1	0	2	3	2	2	1	1	1	2	2	1	2	62	JTT+F+G4
OG0001627	1	2	1	2	2	0	1	1	1	1	1	1	1	2	1	2	1	2	2	1	2	3	3	1	1	1	3	2	3	1	1	2	1	1	2	3	2	1	1	0	1	61	C60
OG0001628	1	2	1	1	1	1	1	1	1	1	2	1	1	4	3	1	1	1	4	1	1	3	3	1	2	1	1	3	3	1	1	1	1	1	1	3	1	1	1	1	1	62	LG+C10+F+G
OG0001629	3	0	1	0	1	6	6	5	6	3	0	1	0	0	1	1	0	0	5	0	0	0	0	1	0	0	0	0	0	0	3	2	3	3	0	0	1	4	3	1	2	62	JTT+F+R4
OG0001630	2	1	1	3	1	1	3	1	1	1	1	1	1	1	0	1	1	1	6	1	0	2	3	4	1	3	1	0	2	1	1	1	1	3	2	2	1	1	1	2	1	62	LG+C30+F+G
OG0001631	1	4	1	1	1	1	3	1	1	1	1	2	2	3	1	1	1	2	3	0	1	2	2	2	1	1	1	0	1	1	1	1	1	4	3	3	1	1	1	2	1	62	LG+C40+F+G
OG0001632	3	0	1	2	2	2	3	1	1	1	2	1	2	1	3	1	1	5	2	1	1	2	1	1	2	3	0	1	3	0	1	1	1	1	2	2	1	1	1	1	1	62	JTT+F+R4
OG0001633	1	3	1	1	3	1	1	1	3	1	4	1	1	4	1	1	1	3	3	1	1	3	3	1	2	1	1	1	1	1	1	1	1	1	1	1	1	1	1	1	1	62	LG+C20+F+G
OG0001634	1	3	2	1	2	1	1	1	1	1	2	1	1	1	0	1	5	1	5	1	1	4	3	1	1	1	1	1	1	2	1	1	1	1	1	2	2	1	1	2	1	62	LG+C20+F+G
OG0001635	2	3	1	1	1	1	4	2	0	4	0	2	0	0	1	0	1	1	3	0	0	2	0	5	1	1	0	4	2	1	2	1	3	4	1	1	0	3	1	1	2	62	LG+C20+F+G
OG0001636	1	5	1	1	1	1	1	2	3	1	2	1	1	3	1	2	1	3	5	1	2	1	2	1	1	1	0	1	2	1	1	1	1	1	2	2	1	1	1	1	1	62	JTT+F+G4
OG0001637	1	3	1	2	3	1	2	1	1	1	2	1	2	4	0	3	3	2	1	1	1	1	1	0	0	2	2	1	2	2	1	1	2	0	1	2	2	2	1	1	2	62	LG+C10+F+G
OG0001638	1	3	1	1	1	1	1	1	2	2	2	1	1	2	1	2	1	2	4	1	2	3	2	1	4	1	3	1	1	1	1	2	1	1	1	2	1	1	1	0	1	62	LG+C30+F+G
OG0001639	1	1	7	2	2	1	1	1	1	1	1	2	1	1	2	1	4	2	1	1	2	2	2	2	1	1	1	2	1	0	2	0	2	1	1	1	1	2	2	1	1	62	JTT+F+G4
OG0001640	1	2	3	2	1	1	1	1	2	1	2	1	1	1	0	1	1	2	2	1	5	1	2	1	1	1	2	1	5	1	1	3	1	1	1	2	1	1	1	2	1	62	LG+C30+F+G
OG0001641	1	3	1	3	1	1	1	1	2	1	1	1	1	2	2	1	2	3	1	2	2	3	5	1	1	1	1	1	2	1	1	1	1	1	4	1	0	1	1	1	1	62	C60
OG0001642	1	3	1	1	1	0	1	1	1	1	1	1	1	1	3	1	1	0	7	1	1	3	3	1	2	1	3	5	1	1	1	1	3	1	1	2	1	1	1	0	1	62	LG+C20+F+G
OG0001643	2	3	1	1	0	2	2	1	4	2	3	1	3	2	1	1	1	1	2	1	0	0	4	1	1	2	2	1	1	2	3	1	2	2	0	0	1	2	1	1	1	62	JTT+F+I+G4
OG0001644	3	0	4	3	1	3	2	1	3	3	2	1	1	1	2	1	2	2	4	1	1	2	3	1	1	1	1	0	0	1	1	1	2	1	2	0	0	1	1	1	1	62	WAG+F+R4
OG0001645	1	2	1	1	1	1	1	1	2	1	0	1	3	2	1	1	5	3	4	1	1	2	1	1	2	1	1	2	2	1	1	3	1	1	2	1	1	1	1	2	1	62	LG+C20+F+G
OG0001646	1	4	1	2	1	1	1	1	2	1	3	1	1	1	1	2	1	3	3	1	1	1	2	1	1	2	2	1	3	1	1	2	1	1	2	1	1	1	1	3	1	62	LG+C20+F+G
OG0001647	1	4	1	1	1	1	1	1	1	1	1	1	1	3	2	1	1	1	5	2	2	5	3	1	2	1	0	2	2	0	1	1	1	1	1	1	1	1	1	3	1	62	LG+C20+F+G
OG0001648	2	1	3	1	2	2	2	2	1	1	0	0	2	2	1	3	2	1	2	2	1	1	0	1	1	3	2	0	2	1	2	2	2	1	2	1	1	3	1	2	1	62	LG+C10+F+G
OG0001649	1	1	2	1	2	1	2	2	2	2	1	1	2	1	1	1	2	1	2	2	2	1	1	1	1	1	1	2	1	2	2	2	2	2	1	1	2	2	2	2	1	62	LG4M
OG0001650	1	2	2	1	1	1	1	1	1	1	2	1	1	2	2	1	2	1	2	2	2	1	2	1	2	2	2	3	2	2	1	1	1	1	2	2	3	0	1	2	1	62	LG+C20+F+G
OG0001651	1	7	1	2	1	1	1	1	1	2	4	1	1	2	1	1	2	1	1	1	2	3	1	1	2	1	0	0	1	1	1	2	1	1	3	3	1	1	1	1	1	61	JTT+F+R4
OG0001652	1	3	1	1	2	1	2	1	3	2	0	1	0	4	1	0	1	2	7	1	2	4	0	1	1	1	0	0	2	1	2	1	2	1	1	2	1	3	1	1	1	62	JTT+F+G4
OG0001653	1	2	2	1	2	1	2	1	3	4	2	1	1	2	1	1	1	1	4	1	1	1	1	1	2	1	2	0	1	1	1	1	1	2	1	2	1	1	4	1	2	62	JTT+F+I+G4
OG0001654	1	3	1	2	1	0	1	1	2	1	2	1	2	3	0	1	1	2	4	1	1	7	2	1	2	1	1	1	1	2	1	1	1	1	2	2	1	1	1	1	1	62	C60
OG0001655	2	1	3	2	1	1	1	1	2	2	0	4	4	1	0	1	1	2	7	2	1	1	1	1	3	1	2	0	3	1	1	1	1	1	0	0	1	1	1	2	1	62	LG+C20+F+G
OG0001656	1	2	2	1	1	1	2	2	2	2	2	1	1	1	1	1	2	1	2	1	2	1	1	1	1	2	1	1	2	1	2	1	2	2	4	2	1	1	2	2	1	62	LG+C20+F+G
OG0001657	1	1	1	3	1	0	3	1	1	1	2	1	2	3	1	2	5	3	7	1	1	1	2	1	1	1	2	1	2	1	0	1	1	1	1	1	1	1	0	1	1	62	LG+C20+F+G
OG0001658	1	1	2	6	2	1	2	1	0	1	0	1	3	2	0	1	1	1	4	1	0	1	0	3	1	2	2	1	3	1	2	3	3	1	1	2	1	1	1	2	0	62	JTT+F+G4
OG0001659	1	1	1	2	1	1	1	3	1	1	1	1	2	2	1	2	1	0	5	2	2	3	4	1	3	2	1	0	1	1	1	1	1	1	4	1	1	1	1	1	1	62	LG+C20+F+G
OG0001660	2	0	3	1	3	2	2	3	3	3	0	1	0	0	1	2	2	1	2	1	0	0	0	3	1	1	1	0	0	3	2	3	2	2	1	0	3	2	2	2	2	62	LG+C10+F+G
OG0001661	1	3	1	1	2	1	1	1	1	1	2	3	1	3	1	1	1	2	7	2	1	1	0	1	1	3	1	1	2	1	1	1	1	1	1	4	1	1	1	1	1	62	LG+C20+F+G
OG0001662	1	2	2	1	2	0	1	0	1	1	1	2	2	1	1	2	3	3	2	1	2	1	0	1	1	2	2	2	3	1	1	2	1	1	1	2	3	1	1	4	1	62	LG+C30+F+G
OG0001663	1	0	1	3	2	1	1	2	3	1	0	2	2	0	2	3	1	1	2	2	1	2	2	1	1	2	0	2	1	1	2	2	2	1	0	1	1	1	1	7	1	62	JTT+F+I+G4
OG0001664	1	4	1	0	1	1	4	1	0	1	0	0	0	0	0	0	1	2	2	2	0	1	0	4	2	2	1	2	1	1	2	2	1	3	4	5	1	1	1	1	6	62	JTT+F+I+G4
OG0001665	1	2	1	2	1	1	1	2	3	1	2	1	2	2	2	1	1	1	4	1	1	2	1	1	1	1	1	3	2	1	1	1	1	1	3	4	1	1	1	1	1	62	LG+C20+F+G
OG0001666	1	1	2	1	1	1	1	1	2	1	2	1	1	3	3	1	1	1	5	2	1	2	2	1	2	0	1	3	1	1	1	1	1	1	3	3	1	1	1	2	1	62	LG+C40+F+G
OG0001667	1	1	2	1	1	2	3	1	5	3	1	1	1	4	1	1	1	2	3	1	1	2	2	1	1	1	1	1	1	1	2	1	1	1	2	1	1	1	1	1	2	62	LG+C40+F+G
OG0001668	1	2	2	1	1	3	2	2	1	2	1	1	1	1	1	1	1	1	2	1	1	1	1	1	1	1	1	1	3	1	1	6	1	1	1	1	5	3	1	1	1	62	LG+C20+F+G
OG0001669	1	3	1	2	2	1	1	0	1	1	3	1	1	5	1	1	1	2	2	1	1	1	0	1	1	1	4	6	2	1	1	1	1	2	1	1	1	1	1	2	1	62	LG+C20+F+G
OG0001670	1	1	1	1	1	0	2	3	1	2	2	1	2	2	1	4	2	1	1	1	1	2	2	1	1	1	1	4	1	1	2	1	3	2	2	2	1	1	1	1	1	62	LG+C10+F+G
OG0001671	1	5	1	1	2	0	1	1	1	2	1	2	1	1	2	2	1	3	3	2	0	0	0	1	2	2	0	2	2	1	2	1	4	1	5	1	1	1	0	2	1	62	LG+C20+F+G
OG0001672	1	1	1	2	1	2	1	1	3	1	2	1	1	3	1	1	1	2	4	3	1	1	2	1	2	1	3	4	1	1	1	1	1	1	1	2	1	1	1	1	1	62	LG+C20+F+G
OG0001673	1	5	1	2	2	1	1	1	1	1	2	1	1	2	0	1	1	1	5	1	1	1	4	1	1	1	1	8	1	1	1	1	1	1	1	1	1	1	1	1	1	62	LG+C40+F+G
OG0001674	1	1	1	4	2	1	1	2	1	2	1	1	1	3	2	1	1	1	6	1	1	0	2	1	2	2	1	3	3	1	1	1	1	1	3	0	1	1	1	1	1	62	JTT+F+I+G4
OG0001675	1	5	2	2	2	1	2	1	1	1	4	1	1	4	2	1	2	2	1	1	1	1	3	1	1	1	3	1	1	1	0	1	1	1	1	1	1	1	2	1	1	62	LG+C20+F+G
OG0001676	1	4	1	1	2	1	2	1	2	1	1	1	1	3	2	1	2	2	4	1	1	3	1	1	1	1	2	3	1	1	1	1	1	1	1	1	3	1	1	1	1	62	LG+C20+F+G
OG0001677	1	0	1	2	1	3	1	1	1	1	1	1	1	3	2	1	3	2	6	1	1	1	1	4	1	3	2	0	1	1	1	2	1	1	1	3	1	1	1	1	1	62	LG+C10+F+G
OG0001678	1	3	1	1	1	1	1	1	3	1	2	1	1	3	1	1	1	3	4	2	2	3	2	1	2	1	3	1	1	2	1	1	1	1	1	1	1	1	1	1	1	62	LG+C10+F+G
OG0001679	1	4	0	1	1	1	1	1	3	1	1	1	1	3	1	1	3	2	4	2	2	2	1	1	2	2	0	3	3	1	1	1	1	1	2	1	1	1	1	1	1	62	JTT+F+I+G4
OG0001680	1	1	2	1	1	1	1	2	0	3	1	1	4	2	2	2	1	0	2	1	1	2	2	1	1	1	1	6	1	1	1	1	2	1	1	4	1	1	1	2	1	62	C60
OG0001681	1	0	2	3	2	3	1	2	0	2	0	3	2	2	2	4	1	1	1	1	0	2	2	1	1	2	0	1	2	1	2	2	1	1	1	0	1	2	3	1	3	62	LG+C20+F+G
OG0001682	1	0	1	1	2	1	1	1	2	1	3	1	1	2	1	2	1	1	4	2	3	1	3	1	2	1	3	2	1	1	1	2	1	1	1	3	1	1	2	1	1	62	LG+C20+F+G
OG0001683	1	1	1	2	1	1	1	1	3	1	4	1	1	3	4	1	1	1	5	1	0	3	0	1	1	2	1	1	4	1	1	1	2	1	2	1	1	1	1	1	1	62	LG+C50+F+G
OG0001684	1	1	1	3	1	1	1	1	3	1	3	2	1	3	4	1	1	1	4	2	1	0	1	1	1	2	2	0	2	1	1	1	1	1	2	4	1	1	1	1	1	62	LG+C40+F+G
OG0001685	1	1	1	2	2	1	1	2	3	1	2	1	1	3	1	1	1	2	4	1	1	4	2	2	1	1	2	3	1	1	1	1	1	1	1	2	1	1	1	1	1	62	LG+C20+F+G
OG0001686	1	4	1	1	1	2	1	2	2	1	3	3	1	1	1	1	1	4	5	1	1	1	0	1	1	1	2	1	1	1	1	1	2	2	1	2	1	1	2	1	1	62	LG+C30+F+G
OG0001687	1	4	1	1	2	1	2	2	1	1	1	2	1	1	1	1	1	2	2	1	1	2	2	1	2	1	0	1	2	2	1	4	1	3	2	4	1	1	1	0	1	62	JTT+F+I+G4
OG0001688	1	0	0	4	1	3	4	1	2	1	2	1	0	2	3	0	1	2	5	2	1	0	5	1	1	0	1	0	2	1	1	2	1	2	3	1	1	1	1	1	1	62	LG+C30+F+G
OG0001689	0	8	0	1	0	0	0	0	0	0	0	0	1	0	0	0	0	0	0	0	22	3	3	0	0	4	0	0	6	0	0	0	0	0	6	8	0	0	0	0	0	62	WAG+F+I+G4
OG0001690	0	2	1	1	2	1	1	1	2	1	2	1	1	2	1	1	4	2	6	1	2	1	4	1	2	1	1	4	1	1	1	0	1	1	1	2	1	1	1	1	1	62	JTT+F+I+G4
OG0001691	0	0	1	3	1	1	2	0	2	1	2	1	2	2	2	2	1	1	6	2	4	1	2	0	1	5	1	1	2	1	1	1	0	2	4	0	0	1	1	1	1	62	LG+C20+F+G
OG0001692	0	0	0	0	0	0	0	0	0	0	0	0	0	0	0	0	0	0	0	0	0	0	0	0	0	0	0	0	0	0	0	0	0	0	61	1	0	0	0	0	0	62	JTT+F+I+G4
OG0001693	2	1	2	1	1	1	2	1	2	1	1	1	3	1	1	0	4	1	1	1	1	1	0	1	2	3	2	0	1	2	2	2	1	1	2	2	2	1	2	2	3	61	JTT+F+G4
OG0001694	2	0	2	3	1	1	1	0	0	1	0	1	4	2	2	4	1	2	4	2	0	1	0	2	2	1	1	0	3	2	2	1	2	1	2	0	2	0	1	2	3	61	JTT+F+I+G4
OG0001695	2	2	4	1	1	2	3	2	1	3	1	2	1	2	1	2	0	1	1	5	0	0	0	1	2	1	2	0	2	0	2	1	1	2	1	1	0	1	2	2	3	61	LG4X
OG0001696	1	1	2	1	1	1	1	1	1	1	3	1	1	2	2	1	1	2	5	2	2	2	1	1	2	1	1	3	1	1	1	2	1	1	2	2	1	1	1	2	1	61	LG+C20+F+G
OG0001697	1	1	1	1	1	1	0	0	1	1	2	1	1	2	1	7	1	1	1	1	1	2	1	1	1	1	0	14	1	1	1	1	1	1	1	0	1	1	1	3	1	61	JTT+F+R3
OG0001698	2	1	1	1	1	2	2	2	3	2	1	2	1	3	1	0	2	1	3	2	1	2	1	2	1	1	0	3	1	1	2	0	2	2	1	1	1	1	2	1	2	61	LG+C20+F+G
OG0001699	2	3	3	2	1	1	1	1	1	1	2	1	2	2	3	1	3	2	1	1	0	2	2	1	1	1	1	1	2	2	1	1	1	1	2	3	1	1	1	0	2	61	LG+C30+F+G
OG0001700	2	4	1	3	1	1	1	1	3	2	1	1	1	1	3	1	1	2	0	0	1	1	1	1	3	2	1	0	3	1	1	3	4	1	1	0	1	1	2	1	2	61	JTT+F+I+G4
OG0001701	1	1	1	2	1	2	1	6	1	1	1	3	2	2	2	1	1	1	3	1	1	0	2	1	1	3	2	0	1	2	1	2	1	1	3	1	1	1	1	1	1	61	JTT+F+I+G4
OG0001702	1	6	1	1	1	1	1	1	2	1	2	1	1	2	1	1	1	1	2	1	1	3	3	1	2	1	2	3	4	1	1	1	1	1	1	1	1	1	1	1	1	61	LG+C30+F+G
OG0001703	1	4	2	3	1	1	3	1	1	1	3	1	1	2	1	1	1	1	5	2	1	3	3	1	1	1	1	1	1	1	1	1	1	2	1	1	1	1	1	0	1	61	JTT+F+I+G4
OG0001704	1	1	1	1	2	1	1	1	2	1	2	1	2	1	1	1	1	4	3	1	1	3	3	1	2	1	2	2	2	1	1	1	1	1	1	4	1	1	1	1	1	61	LG+C20+F+G
OG0001705	1	0	1	2	1	2	5	2	3	2	0	3	4	0	0	2	2	1	2	1	0	1	0	1	1	1	0	0	2	1	1	1	2	3	3	3	1	1	1	2	2	61	JTT+F+I+G4
OG0001706	2	4	1	1	1	1	1	1	2	2	2	1	1	2	1	1	1	3	3	2	1	1	2	1	2	3	2	1	1	1	1	1	1	1	1	2	1	1	1	2	1	61	JTT+F+I+G4
OG0001707	1	4	1	3	1	1	1	1	4	1	3	1	2	1	1	1	4	1	3	1	1	1	1	1	1	1	0	1	2	1	1	1	1	2	2	2	1	1	1	2	1	61	JTT+F+I+G4
OG0001708	1	2	1	1	1	2	2	1	1	2	2	1	1	2	1	2	1	2	1	1	1	2	3	1	1	4	2	2	1	1	1	2	1	1	3	2	1	1	1	1	1	61	LG+C20+F+G
OG0001709	1	3	1	1	1	1	1	1	0	1	2	1	2	3	2	1	1	1	8	1	1	3	3	2	1	1	2	1	1	1	1	1	1	1	0	3	1	1	1	1	1	61	JTT+F+I+G4
OG0001710	1	2	1	3	2	2	1	1	2	1	3	3	1	2	1	1	1	1	2	1	1	2	1	1	1	1	3	1	2	1	1	1	1	2	1	3	1	1	1	2	1	61	JTT+F+I+G4
OG0001711	1	5	1	2	1	1	1	1	1	1	2	1	1	3	1	1	1	2	4	1	1	3	3	1	2	1	4	1	1	1	2	1	1	1	0	1	1	1	1	1	1	61	LG+C20+F+G
OG0001712	1	1	2	1	1	1	2	1	2	2	1	1	2	1	1	1	3	1	1	1	2	2	1	1	1	1	1	1	2	2	4	2	2	2	1	2	1	2	1	2	1	61	C60
OG0001713	1	4	1	1	2	1	1	1	1	1	1	1	1	0	2	1	0	2	5	1	1	2	3	1	3	3	2	2	1	1	1	1	1	2	1	3	1	1	1	1	1	61	JTT+F+I+G4
OG0001714	3	0	0	3	1	1	0	4	0	2	2	1	1	1	2	1	1	1	0	0	0	2	4	0	4	3	4	0	2	1	3	1	0	2	3	2	0	2	1	1	2	61	JTT+F+I+G4
OG0001715	1	4	1	1	0	1	1	1	3	1	2	1	2	1	1	1	1	2	0	2	1	5	4	1	2	2	1	1	1	1	1	1	1	3	2	1	1	1	1	1	2	61	JTT+F+I+G4
OG0001716	2	2	1	0	1	1	3	2	0	3	0	3	0	0	0	3	1	0	0	3	0	0	0	3	0	0	0	3	3	3	3	1	2	4	2	0	1	6	1	0	4	61	LG+C20+F+G
OG0001717	1	2	2	2	4	1	1	1	1	1	0	1	1	1	3	5	1	1	4	1	1	0	1	1	2	2	2	1	1	1	1	1	1	1	1	4	1	1	1	2	1	61	LG+C10+F+G
OG0001718	2	2	2	1	2	1	2	2	1	1	3	2	2	0	0	1	1	2	4	3	1	1	1	2	0	2	1	2	1	1	3	1	2	2	1	1	1	1	1	0	2	61	JTT+F+I+G4
OG0001719	1	4	1	1	1	1	1	1	2	1	3	2	1	2	0	1	1	1	4	1	1	0	2	1	3	3	2	2	3	1	1	1	2	1	2	1	1	1	1	1	1	61	LG+C40+F+G
OG0001720	1	1	2	1	1	1	1	2	1	1	2	1	1	3	1	1	1	1	3	1	1	3	3	1	1	1	3	2	1	1	1	3	1	1	1	3	1	1	1	3	1	61	LG+C20+F+G
OG0001721	1	3	1	0	1	1	2	2	4	1	1	1	4	3	1	1	1	0	4	1	3	1	1	2	1	1	2	0	4	1	2	1	2	1	0	0	1	1	1	1	2	61	JTT+F+I+G4
OG0001722	1	0	2	2	1	1	1	1	1	1	2	1	2	4	1	1	1	1	6	4	1	0	1	1	1	3	3	0	1	1	1	2	1	2	2	1	1	1	1	2	1	61	LG+C30+F+G
OG0001723	1	4	1	3	1	1	1	1	3	1	1	1	3	3	1	1	2	2	3	1	2	3	2	1	1	1	2	0	1	1	1	2	1	1	1	1	1	1	1	1	1	61	LG+C20+F+G
OG0001724	1	0	1	3	2	1	1	1	2	1	4	1	2	3	1	2	1	5	2	3	1	0	1	1	2	2	2	2	1	2	1	1	1	1	1	0	1	1	1	1	1	61	LG+C20+F+G
OG0001725	1	1	1	1	0	1	1	2	5	1	1	1	1	4	2	1	2	2	5	1	1	2	2	1	2	1	1	3	1	2	1	1	1	1	1	1	1	1	1	1	1	61	JTT+F+I+G4
OG0001726	1	3	3	1	3	1	1	1	2	1	1	2	2	1	2	2	2	0	2	1	3	1	1	1	4	1	0	1	1	1	1	1	2	1	1	1	1	1	1	3	2	61	LG+C20+F+G
OG0001727	1	2	1	2	1	1	1	1	3	3	1	1	1	2	2	1	1	2	1	1	1	3	4	1	3	1	0	2	2	1	1	1	1	2	3	1	1	1	1	1	1	61	C60
OG0001728	1	1	2	4	1	1	1	1	1	1	1	1	1	4	1	1	1	2	6	1	2	3	4	1	1	1	1	2	0	1	1	2	1	1	1	1	1	1	1	1	1	61	LG+C40+F+G
OG0001729	1	4	1	1	1	1	2	1	2	1	1	1	1	1	2	1	2	2	4	2	1	1	1	1	3	2	1	2	1	1	1	1	1	1	2	2	2	1	1	2	1	61	LG+C20+F+G
OG0001730	1	6	1	1	1	1	1	1	3	1	1	1	1	2	1	1	4	1	2	1	1	3	2	2	2	1	1	1	1	3	1	2	1	1	1	1	1	1	1	1	1	61	LG+C20+F+G
OG0001731	1	2	1	1	1	1	1	0	1	1	2	2	1	2	4	1	3	1	2	1	3	4	1	1	1	2	2	1	2	3	1	0	1	1	1	2	2	1	2	1	0	61	LG+C20+F+G
OG0001732	1	1	3	1	1	1	1	1	3	0	1	2	2	1	1	1	2	1	1	2	0	1	0	1	2	2	2	3	3	2	2	2	2	1	1	1	2	3	2	1	1	61	JTT+F+I+G4
OG0001733	1	1	2	1	2	1	1	1	3	1	1	2	1	3	2	1	1	2	3	2	2	2	4	1	1	1	2	1	1	2	1	1	1	1	1	1	1	1	1	2	1	61	LG+C20+F+G
OG0001734	1	2	1	1	1	1	1	1	1	1	1	1	3	3	3	2	1	3	2	3	1	1	1	1	1	2	3	1	2	1	1	1	1	1	2	3	1	1	1	1	1	61	LG+C20+F+G
OG0001735	1	1	1	3	1	2	1	1	1	1	2	2	1	2	1	2	1	0	2	1	2	1	3	1	2	1	0	1	1	1	1	1	2	2	1	3	2	2	2	2	3	61	JTT+F+G4
OG0001736	2	2	1	1	1	1	2	1	2	1	2	2	1	3	1	1	1	2	2	1	1	3	2	1	1	1	1	0	1	1	1	1	3	2	1	1	1	1	1	1	6	61	JTT+F+R4
OG0001737	1	3	2	2	2	1	1	1	1	1	2	1	1	2	1	1	1	2	3	1	2	2	3	1	1	4	1	1	1	1	1	1	1	1	1	3	1	1	1	2	1	61	LG+C20+F+G
OG0001738	2	1	2	1	0	2	4	1	1	1	2	4	1	2	1	2	1	2	0	1	1	1	3	0	1	2	1	0	1	1	3	1	1	2	2	1	1	1	1	2	4	61	LG+C20+F+G
OG0001739	1	1	2	1	2	1	3	2	3	2	1	1	1	1	1	1	2	2	1	1	1	1	1	1	1	1	1	1	1	2	3	1	2	3	1	1	1	3	3	1	1	61	LG+C20+F+G
OG0001740	1	13	1	1	1	1	1	2	1	1	0	1	5	2	1	1	0	1	1	1	1	3	5	1	1	1	0	0	2	0	1	1	0	1	1	2	1	1	1	1	1	61	LG+C20+F+G
OG0001741	1	2	1	1	1	1	1	1	1	1	1	1	1	1	1	1	1	1	3	1	3	1	2	1	1	1	1	1	1	1	1	6	1	1	1	1	7	1	1	4	1	61	LG+C30+F+G
OG0001742	1	4	1	1	1	1	1	1	1	4	1	2	1	1	1	1	2	1	2	1	3	1	3	1	1	1	3	4	1	1	1	1	1	1	1	1	2	1	2	1	1	61	C60
OG0001743	1	2	1	3	1	1	1	1	1	1	3	1	1	3	1	2	2	1	4	1	2	4	1	1	2	1	1	2	1	1	1	1	1	1	1	3	1	1	1	1	1	61	LG+C30+F+G
OG0001744	1	5	1	1	1	1	1	1	1	1	2	1	1	1	1	1	1	3	2	1	2	4	3	1	1	2	4	2	2	1	1	2	1	1	0	1	1	1	1	1	1	61	LG+C20+F+G
OG0001745	1	3	1	1	1	1	1	4	5	2	0	2	1	2	1	1	1	1	2	1	1	2	1	1	2	1	1	2	4	1	1	1	2	1	2	1	1	1	1	1	1	61	JTT+F+I+G4
OG0001746	1	2	1	1	2	1	1	1	1	1	3	1	1	2	1	1	6	3	3	1	1	2	4	1	2	1	2	1	1	1	1	1	1	1	1	1	1	1	1	1	1	61	JTT+F+I+G4
OG0001747	1	3	2	2	1	1	1	1	1	1	2	2	1	3	3	2	1	1	5	2	2	1	3	1	2	1	0	0	2	1	1	1	1	1	3	1	1	1	1	0	1	61	LG+C40+F+G
OG0001748	1	4	1	1	2	1	2	1	2	1	2	1	1	2	2	1	2	3	4	2	1	2	2	1	1	1	3	1	1	1	1	1	1	1	1	1	1	1	1	1	1	61	LG+C30+F+G
OG0001749	1	4	1	1	1	1	1	1	4	1	2	1	1	1	1	1	1	1	5	1	1	2	2	1	1	3	3	1	2	1	1	1	1	1	1	2	1	1	1	2	1	61	JTT+F+I+G4
OG0001750	1	2	2	1	1	1	2	2	2	2	2	1	2	1	1	1	1	3	2	1	2	2	1	1	2	2	1	1	1	1	2	1	2	2	1	0	2	2	2	1	1	61	C60
OG0001751	1	3	1	2	1	1	1	1	2	1	2	2	1	2	1	1	1	2	1	3	1	1	2	1	2	1	2	5	1	1	1	1	1	1	2	1	1	1	2	2	1	61	LG+C20+F+G
OG0001752	2	3	1	1	3	2	1	1	3	1	1	1	1	1	1	1	1	1	3	1	1	4	3	2	2	1	3	1	1	1	1	1	2	1	1	1	1	1	1	1	1	61	LG+C30+F+G
OG0001753	1	5	1	1	1	1	1	1	2	1	1	2	1	2	2	1	2	4	2	3	1	2	3	1	1	1	2	2	1	1	1	1	1	1	1	1	1	1	1	1	1	61	LG+C20+F+G
OG0001754	1	1	1	1	1	1	1	1	1	1	2	3	1	1	1	3	3	1	6	4	2	3	1	1	2	1	1	0	1	0	1	2	1	1	2	1	2	1	1	1	1	61	LG+C30+F+G
OG0001755	1	4	1	3	1	1	1	2	1	1	2	1	1	3	2	1	1	1	3	1	1	2	0	1	2	2	1	1	1	1	1	1	4	1	2	2	1	1	1	2	1	61	LG+C20+F+G
OG0001756	1	9	1	1	1	1	1	1	1	1	1	1	1	3	1	2	1	1	4	2	1	2	4	1	2	1	1	2	1	1	1	1	1	2	0	0	1	1	1	1	1	61	LG+C30+F+G
OG0001757	1	2	1	0	1	1	5	2	0	2	0	3	1	2	1	3	3	2	3	1	1	2	1	1	2	1	0	0	1	1	2	1	1	3	3	1	1	1	1	0	3	61	LG+C10+F+G
OG0001758	1	3	1	2	1	1	1	1	1	1	1	1	3	3	0	0	1	1	3	2	1	3	0	1	2	4	2	1	3	1	1	1	2	1	3	2	1	1	1	1	1	61	LG+C20+F+G
OG0001759	1	3	2	1	1	1	1	1	2	1	1	1	1	1	1	0	3	1	5	1	1	2	2	1	1	1	4	1	1	2	1	2	1	1	2	1	1	1	1	4	1	61	LG+C40+F+G
OG0001760	1	0	1	2	1	2	1	1	1	1	3	1	1	2	1	3	1	4	4	2	2	0	2	1	3	2	0	1	2	1	1	1	2	1	2	1	1	1	1	2	1	61	LG+C20+F+G
OG0001761	1	0	0	1	1	4	3	4	1	3	2	1	1	1	2	0	1	0	4	2	2	0	1	2	2	0	1	4	2	1	1	1	1	3	1	1	1	1	1	1	1	60	LG+C20+F+G
OG0001762	1	8	2	1	1	1	1	1	1	1	1	1	1	4	1	1	1	2	4	1	1	2	3	1	2	1	1	0	1	1	1	1	1	1	3	1	1	1	1	1	1	61	LG+C30+F+G
OG0001763	1	3	2	1	3	1	1	1	4	0	2	2	1	1	2	1	1	2	4	2	2	2	2	1	1	2	3	0	1	0	1	1	1	1	1	1	1	1	1	2	1	61	LG+C20+F+G
OG0001764	1	2	2	2	1	1	2	2	1	1	1	2	1	1	3	2	1	3	4	2	0	0	0	1	1	2	1	1	2	1	1	1	4	1	4	1	1	1	1	1	1	61	JTT+F+I+G4
OG0001765	1	1	1	1	2	1	2	1	1	1	3	1	2	3	1	2	1	3	4	1	1	1	3	1	1	1	2	2	1	1	1	1	1	1	1	1	2	1	2	1	2	61	LG+C20+F+G
OG0001766	1	2	1	2	1	1	1	2	1	1	1	1	3	2	3	2	1	2	3	2	2	1	1	1	1	1	3	0	1	1	1	2	1	1	2	2	2	1	1	2	1	61	JTT+F+I+G4
OG0001767	0	1	2	0	2	1	1	2	0	1	0	2	2	0	0	3	2	0	2	3	1	0	1	1	0	2	2	0	2	2	3	4	1	3	2	1	2	3	2	3	2	61	LG+C10+F+G
OG0001768	0	2	1	1	2	1	1	1	1	1	2	1	2	1	0	2	1	2	1	0	4	2	2	1	1	0	0	1	5	2	1	4	1	0	5	1	2	1	1	4	0	61	LG+C10+F+G
OG0001769	0	0	3	0	2	3	3	2	1	4	0	1	3	1	0	1	2	0	1	2	0	0	0	0	2	1	0	3	1	3	3	2	2	3	1	0	2	3	2	2	2	61	JTT+F+I+G4
OG0001770	1	1	1	1	1	1	1	1	0	1	2	1	2	2	2	1	1	1	8	1	2	1	3	1	2	2	0	2	3	1	1	1	1	1	1	2	1	1	1	1	2	60	LG+C20+F+G
OG0001771	1	6	1	3	1	1	1	1	2	1	2	1	1	2	2	1	1	2	1	2	2	1	1	1	2	1	2	2	1	2	1	1	1	1	1	2	1	1	1	1	1	60	LG+C20+F+G
OG0001772	2	2	1	2	1	1	2	2	2	1	3	1	1	1	1	2	1	1	4	1	1	1	2	2	2	1	3	0	1	1	2	1	1	2	1	1	1	1	1	2	1	60	JTT+F+I+G4
OG0001773	1	4	1	2	2	1	1	1	0	1	3	1	2	2	1	1	1	3	3	1	2	3	1	2	1	2	1	1	1	1	1	1	1	1	2	2	1	1	1	1	1	60	LG+C20+F+G
OG0001774	1	2	1	2	2	1	1	3	1	2	1	1	2	2	2	2	1	2	2	1	1	1	1	1	1	2	1	1	2	1	2	1	1	1	3	2	2	1	1	1	1	60	LG+C10+F+G
OG0001775	2	1	3	2	0	1	1	1	2	1	1	1	2	0	1	3	2	0	4	1	2	2	0	0	2	3	0	2	2	2	1	1	3	1	3	2	1	0	1	2	1	60	JTT+F+I+G4
OG0001776	1	0	2	3	2	1	1	1	3	1	1	1	1	1	5	4	1	1	4	1	0	0	2	2	2	1	2	0	0	1	1	2	5	1	0	0	1	1	1	2	1	60	LG+C30+F+G
OG0001777	1	4	1	2	1	1	1	1	1	1	2	1	1	2	3	1	1	1	3	2	1	4	3	1	3	1	1	1	1	0	1	1	1	1	1	3	1	1	1	1	1	60	LG+C20+F+G
OG0001778	1	4	1	1	1	1	4	1	3	1	2	1	1	2	2	1	1	3	2	2	2	1	0	1	2	1	2	2	2	1	1	1	1	1	1	1	1	1	1	1	1	60	LG+C20+F+G
OG0001779	2	1	2	0	2	1	1	2	2	2	1	2	1	1	1	1	4	1	3	2	1	1	1	2	1	1	0	0	2	2	2	2	2	1	1	1	2	2	1	2	1	60	LG+C10+F+G
OG0001780	1	5	1	0	2	1	1	1	1	1	1	1	1	2	2	1	1	4	4	1	2	3	3	1	1	1	2	1	1	1	1	1	1	1	1	1	2	1	1	1	1	60	LG4X
OG0001781	1	1	2	0	1	1	2	3	1	2	1	1	1	1	1	2	2	1	2	2	1	1	1	1	2	1	1	2	0	2	3	2	2	3	1	1	1	2	1	2	2	60	LG+C20+F+G
OG0001782	1	1	0	2	2	1	1	1	1	1	3	2	1	2	1	1	1	2	5	1	3	2	1	1	1	1	1	1	1	4	1	2	1	1	1	2	1	1	1	2	1	60	LG+C20+F+G
OG0001783	1	2	3	1	1	3	2	1	3	2	1	1	0	1	2	3	1	0	1	0	1	1	1	1	1	0	2	1	1	1	2	2	1	2	2	1	5	1	1	2	2	60	LG+C30+F+G
OG0001784	1	2	1	1	1	1	1	2	3	1	2	2	1	1	1	1	2	1	2	1	2	2	3	2	1	1	1	2	1	2	1	2	3	1	1	1	1	1	1	2	1	60	LG+C40+F+G
OG0001785	2	2	1	1	1	1	1	1	1	1	1	1	1	3	2	2	1	1	5	1	1	1	2	2	1	2	1	1	3	1	1	1	1	1	2	4	1	1	1	1	1	60	LG+C20+F+G
OG0001786	1	2	1	2	1	1	1	1	1	1	1	1	1	2	2	1	1	3	3	1	2	5	3	1	1	1	1	1	2	1	1	1	2	1	2	1	1	1	1	1	2	60	C60
OG0001787	1	15	1	1	1	1	0	1	1	1	2	1	1	2	1	1	1	1	1	1	2	4	1	1	1	1	1	1	1	1	1	2	1	1	1	1	1	1	1	0	1	60	LG+C10+F+G
OG0001788	1	2	1	2	1	1	1	1	2	2	1	1	1	2	4	1	4	2	3	1	1	1	1	1	1	3	1	2	1	1	1	1	1	1	1	3	1	0	2	1	1	60	LG+C20+F+G
OG0001789	1	1	1	1	1	1	1	2	2	1	3	1	1	2	1	1	2	2	2	1	2	5	3	1	1	1	1	1	1	1	1	1	1	1	1	4	1	1	1	2	1	60	JTT+F+I+G4
OG0001790	1	3	1	1	1	1	1	1	0	1	2	1	1	2	1	1	1	2	5	2	0	2	1	1	2	2	0	3	3	3	1	1	2	1	1	1	1	1	1	2	2	60	LG+C20+F+G
OG0001791	1	2	1	1	2	1	1	1	1	1	1	1	2	2	1	1	2	1	2	1	2	3	3	1	1	2	1	2	2	1	1	1	2	1	3	1	1	1	1	3	1	60	LG+C10+F+G
OG0001792	1	6	1	1	1	1	1	1	3	1	0	1	1	3	1	2	1	2	2	1	1	2	2	1	1	1	3	1	1	1	1	1	1	1	1	3	2	1	1	2	1	60	LG+C30+F+G
OG0001793	1	0	1	1	1	1	1	1	2	1	1	1	1	2	1	1	1	2	6	2	4	1	4	1	3	0	2	3	1	1	1	1	1	1	1	1	1	1	1	2	1	60	LG+C40+F+G
OG0001794	1	1	1	1	2	1	1	1	1	1	1	1	1	4	1	1	1	2	4	4	4	3	4	1	1	1	1	1	0	0	1	1	1	1	1	1	2	1	1	2	1	60	LG+C30+F+G
OG0001795	1	2	1	1	1	1	1	1	3	1	2	1	1	1	1	1	2	2	3	2	1	3	3	1	1	5	1	2	1	1	1	1	1	1	1	1	2	1	1	1	1	60	LG+C20+F+G
OG0001796	1	4	1	3	1	1	1	1	2	1	0	1	1	3	2	1	1	2	4	1	1	1	0	1	1	4	1	3	1	1	1	1	1	2	2	1	1	1	1	2	1	60	LG+C20+F+G
OG0001797	1	4	1	1	1	1	1	1	1	2	3	2	1	1	1	1	4	1	5	1	0	2	2	1	1	1	1	3	1	1	1	2	1	2	1	1	1	1	1	1	1	60	LG+C20+F+G
OG0001798	1	2	1	1	1	1	1	1	5	1	3	2	3	2	1	1	1	2	2	1	1	0	1	2	2	1	2	1	1	1	1	1	1	1	4	2	1	1	1	1	1	60	JTT+F+I+G4
OG0001799	1	1	1	2	1	1	1	2	2	1	1	2	2	2	2	1	1	2	3	1	1	2	3	1	1	1	1	3	3	1	0	1	1	1	2	2	1	1	1	1	2	60	LG4X
OG0001800	1	4	2	1	2	1	1	1	1	2	2	1	1	1	1	1	1	2	4	1	1	1	2	1	1	3	1	2	1	1	1	1	1	1	2	3	1	1	1	2	1	60	JTT+F+G4
OG0001801	1	3	1	1	1	1	2	1	2	1	3	1	1	3	2	1	1	2	3	1	1	3	2	1	1	1	2	3	1	1	1	1	1	1	1	1	2	1	1	1	1	60	LG+C20+F+G
OG0001802	3	1	1	2	0	2	2	4	0	3	1	3	1	0	2	2	1	1	0	1	0	0	0	3	1	1	2	2	3	1	1	2	2	2	1	2	1	1	1	1	3	60	LG+C20+F+G
OG0001803	2	1	1	1	0	1	2	2	2	1	1	1	1	2	1	2	1	1	7	3	2	1	1	0	1	3	1	1	1	1	2	2	1	2	1	1	1	1	2	1	1	60	LG+C30+F+G
OG0001804	1	2	1	1	1	1	1	2	2	1	3	1	1	1	2	1	1	2	4	1	1	4	0	1	1	2	1	2	1	1	1	1	1	1	3	3	2	1	1	1	1	60	LG+C20+F+G
OG0001805	1	1	1	3	1	1	3	1	1	1	2	1	1	1	3	1	2	3	0	1	1	2	1	1	1	3	2	0	2	1	1	2	3	2	1	3	1	1	1	1	1	60	LG+C20+F+G
OG0001806	1	0	1	2	1	2	1	1	2	1	1	1	1	1	2	0	1	3	4	1	1	1	0	2	2	2	2	3	1	1	2	1	2	3	1	3	2	2	1	0	1	60	LG+C10+F+G
OG0001807	1	4	1	2	2	1	2	1	1	1	0	1	1	0	1	3	2	2	0	3	1	2	0	1	1	2	3	0	5	1	1	2	1	1	2	3	2	0	1	1	1	60	WAG+F+G4
OG0001808	1	3	1	1	1	1	1	1	2	1	1	1	1	2	1	3	4	1	4	0	3	2	1	1	2	1	0	0	2	1	1	1	3	1	1	4	1	1	1	1	1	60	JTT+F+I+G4
OG0001809	1	5	1	1	2	1	1	1	3	1	2	1	1	1	2	1	1	2	6	1	1	3	1	1	1	1	2	0	1	1	1	1	1	1	1	1	2	1	1	2	1	60	LG+C20+F+G
OG0001810	1	2	1	2	1	1	1	1	2	1	3	2	1	3	1	1	1	3	3	1	1	3	3	1	1	1	3	1	1	1	2	1	1	1	1	1	1	1	1	1	1	60	LG+C20+F+G
OG0001811	1	2	1	1	1	1	1	1	4	1	2	1	1	1	2	1	1	1	3	1	2	3	2	2	2	1	1	2	1	1	1	2	2	1	1	2	1	2	1	1	1	60	LG+C10+F+G
OG0001812	1	3	1	2	2	1	2	2	2	2	1	1	1	1	1	1	2	0	2	1	2	2	2	1	1	1	1	1	2	1	2	1	2	2	2	2	1	2	2	0	1	60	LG+C30+F+G
OG0001813	1	3	1	1	1	1	1	1	1	1	1	1	1	3	2	1	1	2	6	0	2	2	4	1	1	1	1	2	0	1	1	2	1	4	1	1	1	1	1	1	1	60	LG+C30+F+G
OG0001814	1	3	1	1	1	1	1	1	2	1	2	1	3	1	2	1	1	1	5	1	1	1	2	1	2	2	2	1	1	1	1	2	1	2	2	2	1	1	1	1	1	60	JTT+F+I+G4
OG0001815	1	3	1	1	3	1	1	2	1	1	2	1	1	1	1	1	1	2	2	1	1	1	2	1	1	3	1	3	1	2	2	1	1	1	2	3	1	1	1	2	1	60	JTT+F+I+G4
OG0001816	1	2	0	2	1	1	2	1	1	1	2	1	1	2	2	1	1	3	5	0	1	1	2	1	2	1	2	5	1	1	1	1	1	1	1	1	1	1	1	3	1	60	LG+C20+F+G
OG0001817	1	5	1	1	1	1	1	1	2	1	2	1	1	2	1	1	1	1	2	0	2	1	1	1	2	3	1	4	2	1	1	1	1	2	3	1	2	1	1	1	1	60	LG+C20+F+G
OG0001818	1	3	1	2	1	1	4	1	1	1	0	1	1	2	1	2	1	1	6	1	2	0	1	1	1	2	2	1	1	1	1	2	1	4	1	2	1	1	1	1	1	60	JTT+F+I+G4
OG0001819	1	1	1	1	1	1	1	1	1	1	2	2	1	1	2	3	1	2	1	1	1	5	5	1	1	1	1	1	3	1	1	1	1	1	3	1	1	1	2	1	1	60	C60
OG0001820	1	1	1	1	2	1	1	1	1	1	1	1	0	2	0	1	1	2	4	3	2	0	1	1	3	2	3	0	3	0	1	2	1	2	3	4	2	1	1	1	1	60	JTT+F+G4
OG0001821	1	3	4	1	3	1	1	1	1	1	1	1	1	1	1	1	2	1	4	1	0	2	1	0	3	1	3	2	1	2	1	1	1	1	3	2	1	0	1	2	1	60	LG+C20+F+G
OG0001822	1	3	2	2	1	1	1	1	2	1	1	1	1	2	1	2	1	2	5	3	1	0	1	1	1	2	2	2	1	1	1	1	1	2	1	2	2	1	1	1	1	60	LG+C10+F+G
OG0001823	1	1	2	2	2	1	2	1	2	3	1	1	1	1	1	1	2	1	3	1	2	1	1	1	2	0	1	1	1	1	2	2	2	2	1	2	2	2	1	2	1	60	LG+C20+F+G
OG0001824	1	5	1	1	2	1	1	1	1	1	3	1	1	2	3	1	1	2	4	1	1	1	2	1	1	1	1	2	1	2	1	1	1	1	3	1	1	1	1	1	1	60	LG+C20+F+G
OG0001825	1	4	1	1	2	1	1	1	2	1	2	1	1	2	1	1	1	1	6	2	1	4	2	1	1	1	1	3	1	1	1	1	1	1	1	1	1	1	1	1	1	60	LG+C20+F+G
OG0001826	1	4	1	2	1	1	2	1	1	1	2	1	1	1	1	1	1	2	5	2	1	3	2	1	1	1	2	2	1	1	0	1	1	1	3	2	1	1	1	1	1	60	JTT+F+I+G4
OG0001827	1	2	1	1	1	1	2	1	1	1	3	1	4	3	0	1	1	1	6	1	2	3	3	1	2	1	1	0	1	1	1	1	1	1	1	1	2	1	1	1	1	60	JTT+F+R4
OG0001828	1	4	1	1	2	1	1	1	1	1	1	1	1	1	3	1	1	2	6	1	2	1	3	1	2	1	2	1	2	2	1	1	1	1	1	1	1	1	1	1	1	60	LG+C20+F+G
OG0001829	1	5	1	1	1	1	1	1	2	1	3	1	1	3	2	1	1	2	4	1	1	2	3	1	1	1	2	0	1	1	2	1	1	1	1	2	1	1	1	1	1	60	LG+C30+F+G
OG0001830	1	2	1	3	3	1	1	2	2	1	2	1	1	2	1	1	1	2	2	1	1	1	2	1	2	1	2	1	1	2	1	1	2	3	1	1	1	1	2	1	1	60	LG+C20+F+G
OG0001831	1	1	0	3	1	1	1	1	2	1	1	2	1	2	2	1	1	3	2	3	1	3	1	1	1	1	1	4	1	1	1	1	1	1	2	4	1	1	1	1	1	60	LG+C20+F+G
OG0001832	1	4	2	1	2	1	1	1	4	1	2	1	1	1	1	2	1	1	3	2	1	2	2	1	1	1	1	1	1	1	1	1	1	2	1	1	1	1	2	1	3	60	JTT+F+G4
OG0001833	1	5	3	1	1	0	1	1	2	1	1	1	1	1	2	2	1	2	4	1	0	2	3	1	2	1	1	0	2	1	1	1	1	1	1	3	1	1	1	3	1	60	LG+C20+F+G
OG0001834	1	2	2	1	3	1	1	1	1	2	1	1	2	1	0	2	2	1	4	2	2	1	2	1	1	2	1	1	2	2	0	2	1	2	1	1	2	2	1	1	1	60	LG+C20+F+G
OG0001835	1	3	1	3	2	1	0	1	4	1	2	1	1	1	1	2	1	1	4	1	1	2	0	1	3	1	1	3	1	1	1	1	1	1	2	2	2	1	1	1	1	60	LG+C20+F+G
OG0001836	1	4	2	1	1	1	1	1	1	1	2	1	1	1	2	1	1	2	8	2	2	2	3	1	1	1	1	2	1	1	1	1	1	1	1	1	1	1	1	0	1	60	JTT+F+I+G4
OG0001837	1	3	1	1	1	1	1	1	0	1	0	1	2	2	2	5	5	4	1	1	0	0	2	1	2	1	0	1	2	2	1	2	3	1	1	2	1	0	1	1	2	60	JTT+F+I+G4
OG0001838	1	4	2	1	2	1	1	1	1	1	1	1	1	1	1	1	3	2	4	2	1	3	2	1	2	1	2	1	1	1	1	1	1	2	1	1	2	1	1	1	1	60	LG+C40+F+G
OG0001839	1	11	1	3	1	1	1	1	1	1	1	1	1	1	4	1	1	2	2	1	1	2	1	1	1	1	1	0	1	1	1	2	1	1	2	1	1	1	1	1	1	60	LG+C30+F+G
OG0001840	1	4	0	2	2	2	2	2	3	1	2	1	1	3	2	1	1	1	1	1	0	2	0	1	2	1	2	2	1	2	1	1	1	2	2	2	2	1	1	0	1	60	LG+C20+F+G
OG0001841	1	2	1	1	1	1	1	1	1	1	1	2	1	2	2	1	1	2	2	1	3	2	2	1	2	2	2	5	1	1	1	0	1	1	2	2	1	1	1	1	2	60	LG+C20+F+G
OG0001842	2	1	1	2	1	2	2	2	0	2	1	2	1	1	1	0	1	1	4	2	1	0	0	2	1	1	1	1	1	2	2	3	2	2	1	1	2	2	2	2	2	60	JTT+F+I+G4
OG0001843	1	2	1	2	2	1	1	1	3	1	1	1	2	1	4	1	0	4	4	1	1	2	1	1	1	1	1	3	3	1	1	1	1	1	1	1	1	1	1	1	1	60	LG+C20+F+G
OG0001844	1	1	3	1	2	1	1	1	1	1	1	1	1	1	1	4	5	1	4	0	1	1	0	1	1	1	2	2	1	2	1	4	1	1	2	1	2	1	1	1	1	60	LG+C10+F+G
OG0001845	0	2	1	4	2	1	1	1	5	1	1	1	1	1	4	1	1	2	1	1	1	1	0	1	3	1	0	1	2	2	1	1	2	1	1	4	1	1	1	2	1	60	JTT+F+G4
OG0001846	0	8	0	3	1	0	0	0	0	0	2	1	2	2	2	6	0	1	3	4	1	2	1	0	2	2	5	3	1	1	1	1	0	0	2	1	1	0	0	1	0	60	LG+C30+F+G
OG0001847	0	2	1	2	2	1	2	1	2	2	1	1	1	2	2	1	1	1	3	2	1	2	1	1	2	0	1	1	2	1	2	1	2	2	2	2	1	2	2	1	1	60	C60
OG0001848	0	1	1	1	1	0	0	0	0	0	1	1	1	3	2	1	1	4	6	2	1	4	2	0	2	1	3	5	2	1	0	2	0	0	3	4	1	0	0	3	0	60	LG+C20+F+G
OG0001849	0	0	40	0	0	2	0	0	0	2	0	0	0	0	2	0	1	0	2	0	0	0	0	1	0	0	2	1	0	0	1	2	1	2	0	0	0	1	0	0	0	60	JTT+F+R4
OG0001850	2	0	2	1	1	1	2	1	0	3	1	2	0	0	1	1	5	2	0	1	0	0	0	3	1	1	1	2	3	2	2	1	2	3	3	1	1	2	1	1	3	59	LG+C20+F+G
OG0001851	3	0	1	1	1	1	4	2	0	2	0	3	3	3	1	0	2	1	1	2	0	0	0	2	2	3	1	1	2	1	1	1	1	1	1	2	1	1	1	2	4	59	JTT+F+I+G4
OG0001852	1	4	1	2	1	1	1	1	1	1	2	1	1	1	1	1	1	2	7	1	2	3	2	1	1	1	2	1	1	1	1	1	1	1	1	1	2	1	1	1	1	59	LG+C20+F+G
OG0001853	3	3	1	0	1	1	1	1	0	1	1	3	2	1	0	3	3	2	1	2	1	2	1	1	1	1	3	1	1	1	1	1	1	4	1	1	1	2	1	1	2	59	LG+C30+F+G
OG0001854	2	0	1	1	2	3	1	2	4	1	1	2	4	1	1	2	1	1	0	2	0	0	0	2	0	1	1	1	1	1	2	1	2	3	1	1	1	2	2	1	4	59	JTT+F+G4
OG0001855	2	2	1	1	1	2	2	1	0	1	0	2	1	1	3	2	2	2	2	3	2	0	1	1	1	1	1	0	1	0	2	1	1	2	1	3	1	1	2	2	3	58	JTT+F+I+G4
OG0001856	3	0	2	0	2	0	2	3	2	2	2	2	0	2	2	0	2	1	4	0	13	0	0	0	0	1	0	0	1	2	0	2	0	0	2	1	1	0	1	2	2	59	LG+C20+F+G
OG0001857	2	2	2	2	1	1	0	3	0	1	1	2	1	2	1	2	1	1	2	1	0	1	3	1	1	1	0	3	1	1	2	1	2	1	2	2	1	1	2	2	3	59	JTT+F+I+G4
OG0001858	1	1	4	2	2	1	2	2	2	2	1	2	2	1	1	3	1	1	2	1	1	2	2	2	1	1	1	2	1	1	2	1	1	0	1	0	1	2	1	1	1	59	LG+C20+F+G
OG0001859	1	6	1	1	3	1	1	1	1	1	2	1	2	2	2	2	1	2	1	1	2	2	1	0	2	2	2	0	1	1	1	1	1	2	1	2	1	1	1	1	1	59	JTT+F+I+G4
OG0001860	1	0	3	1	2	2	1	1	1	1	2	1	1	1	1	4	1	1	5	2	1	0	0	1	2	2	3	2	1	1	1	1	1	1	2	2	2	1	1	1	1	59	LG+C20+F+G
OG0001861	1	6	1	1	2	2	1	1	2	2	1	4	1	0	2	1	1	2	2	1	2	1	0	1	3	1	1	0	1	1	1	1	1	2	1	4	1	1	1	1	0	59	LG+C30+F+G
OG0001862	1	4	1	1	1	1	1	1	3	1	2	1	1	2	1	1	1	1	4	1	1	3	1	1	1	1	3	3	1	2	1	1	1	1	1	2	1	1	1	1	1	59	LG+C20+F+G
OG0001863	3	1	1	1	1	1	1	2	0	1	2	1	1	1	2	3	1	1	3	2	1	1	1	1	0	1	1	2	4	3	1	1	5	1	0	0	1	1	2	1	2	59	JTT+F+R3
OG0001864	1	3	1	1	2	1	1	2	1	1	3	1	1	2	1	1	1	1	3	3	2	3	2	1	1	1	1	1	1	1	1	1	1	2	1	1	1	1	2	2	1	59	LG+C20+F+G
OG0001865	1	3	1	1	1	1	2	1	1	1	2	1	1	2	2	1	1	1	6	1	1	3	2	1	1	1	1	3	2	1	1	1	2	1	1	2	1	0	1	1	1	59	LG+C20+F+G
OG0001866	1	2	1	2	2	1	1	1	1	1	1	2	1	3	1	1	1	2	1	1	1	2	3	1	1	1	3	4	2	1	2	1	1	1	1	2	1	1	1	1	1	59	LG+C20+F+G
OG0001867	4	0	1	0	0	1	1	6	0	6	0	3	0	1	0	0	1	0	2	1	0	0	0	0	2	4	0	0	2	1	3	1	6	3	1	0	0	2	1	2	4	59	LG+C20+F+G
OG0001868	1	1	1	2	1	1	2	1	2	1	2	1	1	2	2	1	2	2	2	3	1	2	2	1	2	1	1	1	1	1	1	2	1	1	1	2	0	2	1	2	2	59	LG+C10+F+G
OG0001869	2	1	1	1	0	3	3	2	4	3	1	1	1	1	0	2	1	1	3	1	0	1	1	1	1	1	1	0	1	2	2	1	2	2	1	1	1	3	2	1	2	59	JTT+F+I+G4
OG0001870	1	2	1	1	3	1	1	1	1	1	3	1	1	2	1	1	1	4	2	1	1	1	2	1	2	1	2	2	1	1	1	2	1	1	1	1	1	1	1	4	1	59	C60
OG0001871	2	1	1	1	1	1	2	2	2	2	2	2	2	1	1	1	2	1	2	0	1	1	1	2	1	1	2	1	1	1	1	2	2	2	1	1	2	3	1	1	2	59	LG4X
OG0001872	1	1	2	1	3	1	1	1	0	2	2	1	1	4	0	1	1	2	3	2	1	2	1	2	1	3	0	4	2	1	1	1	1	2	1	1	1	1	1	1	1	59	LG+C40+F+G
OG0001873	1	4	1	1	0	2	1	1	3	1	2	1	1	1	1	1	1	2	3	1	2	1	3	1	1	1	1	2	1	1	1	1	2	1	3	3	1	1	1	1	1	59	LG+C20+F+G
OG0001874	4	0	1	3	1	1	3	2	2	1	0	1	1	3	1	2	2	2	2	2	0	0	2	1	1	2	0	1	1	1	1	1	4	2	1	2	1	1	1	1	1	59	JTT+F+I+G4
OG0001875	1	0	1	0	2	1	3	1	3	1	2	2	0	4	1	2	2	3	7	2	0	0	0	1	2	0	3	0	0	2	1	1	1	2	0	0	3	1	1	0	2	58	JTT+F+G4
OG0001876	1	3	1	3	1	1	1	0	2	1	3	1	1	3	1	1	1	2	3	1	1	1	3	1	1	2	1	2	1	1	1	2	2	1	1	2	1	1	1	1	1	59	JTT+F+I+G4
OG0001877	2	0	2	0	2	0	3	2	2	2	1	1	0	0	0	2	2	2	4	3	0	0	1	0	0	1	0	1	4	2	2	2	3	3	1	0	2	2	2	2	1	59	LG+C20+F+G
OG0001878	1	4	1	1	1	1	1	1	0	1	2	1	1	2	1	1	1	1	5	1	2	1	2	2	1	1	1	1	1	1	1	1	2	1	1	4	1	1	1	3	2	59	JTT+F+I+G4
OG0001879	1	1	1	1	2	1	1	1	2	1	3	1	1	1	1	1	3	2	4	1	1	1	2	1	1	1	2	2	1	4	1	1	1	1	1	3	1	1	1	1	1	59	LG+C20+F+G
OG0001880	1	4	1	1	1	1	1	1	2	1	4	1	1	3	1	1	1	2	5	1	1	1	1	1	2	1	3	2	1	1	1	1	1	1	1	1	1	1	1	1	1	59	JTT+F+I+G4
OG0001881	1	0	1	1	1	1	3	1	1	1	0	1	3	2	1	2	1	1	4	1	1	0	1	1	2	2	1	4	4	1	1	1	1	1	2	3	1	1	1	2	1	59	LG+C20+F+G
OG0001882	1	5	1	2	1	1	1	1	1	1	5	1	1	2	1	1	1	1	4	1	1	2	2	1	2	1	1	1	1	1	1	2	2	1	1	1	1	1	1	1	1	59	JTT+F+I+G4
OG0001883	1	1	1	1	4	1	3	1	1	3	1	1	1	1	1	1	1	2	4	1	1	1	2	1	2	1	0	4	2	1	2	1	1	2	1	0	1	1	1	2	1	59	LG+C30+F+G
OG0001884	1	2	0	1	2	1	1	1	1	1	1	1	1	2	2	3	2	1	2	1	1	1	1	1	1	1	2	2	2	2	1	1	1	1	1	1	6	1	1	3	1	59	C60
OG0001885	1	6	1	1	1	1	1	1	1	1	3	3	1	1	1	1	1	1	6	1	1	2	2	1	1	3	1	0	1	2	1	1	1	1	1	1	1	1	1	1	1	59	JTT+F+I+G4
OG0001886	1	2	1	5	1	1	1	1	2	1	2	2	1	3	2	1	2	1	3	1	2	1	1	1	1	1	2	1	2	1	1	1	1	1	1	1	1	1	1	2	1	59	JTT+F+I+G4
OG0001887	1	4	1	2	1	1	1	1	4	1	1	2	1	0	2	3	1	0	5	1	0	1	0	1	1	2	1	1	2	3	1	1	1	1	2	2	2	1	1	1	1	59	LG+C20+F+G
OG0001888	1	5	1	2	1	1	1	1	1	1	2	1	1	1	2	1	1	2	3	1	1	2	2	1	1	1	2	2	1	2	1	1	1	1	3	2	1	1	1	1	1	59	LG+C20+F+G
OG0001889	3	2	2	1	2	1	1	2	2	2	1	1	1	1	1	1	1	3	1	1	1	2	3	1	1	1	2	1	1	1	1	2	0	3	1	1	2	1	2	1	1	59	JTT+F+I+G4
OG0001890	1	3	2	1	1	1	1	1	2	1	1	1	1	2	1	1	1	4	3	2	1	3	3	1	1	2	1	1	1	1	1	2	1	1	1	1	1	1	2	1	1	59	LG+C20+F+G
OG0001891	1	1	2	1	2	1	1	1	2	1	2	1	1	3	1	1	2	2	4	1	1	2	2	1	1	1	1	1	2	3	1	1	1	1	1	1	1	1	1	1	3	59	JTT+F+I+G4
OG0001892	1	4	1	3	1	1	1	1	2	1	2	1	1	1	2	1	1	2	3	1	4	1	3	1	1	1	3	1	2	1	1	1	1	1	1	1	1	1	0	1	1	59	LG+C30+F+G
OG0001893	1	2	1	1	1	1	2	1	0	1	2	1	1	3	2	1	1	1	2	1	1	2	4	2	2	1	3	0	1	1	1	2	2	3	1	1	1	1	1	2	1	59	JTT+F+I+G4
OG0001894	1	3	1	1	1	1	2	1	5	1	4	1	1	3	1	0	1	1	3	1	1	2	2	1	0	2	1	1	1	1	1	1	1	1	1	1	1	1	2	3	1	59	JTT+F+I+G4
OG0001895	4	0	1	1	2	0	2	2	5	2	0	0	0	0	0	2	1	1	5	1	0	1	0	1	0	0	1	1	0	2	2	3	2	2	3	0	2	2	2	4	2	59	LG+C20+F+G
OG0001896	2	2	1	3	1	1	1	2	2	2	2	1	1	1	1	2	1	2	2	1	2	1	2	2	1	1	1	1	1	2	2	1	2	1	3	1	1	0	1	1	1	59	JTT+F+I+G4
OG0001897	2	5	1	2	1	1	1	2	0	1	2	1	1	3	3	2	0	1	1	1	0	3	3	1	2	1	1	1	1	1	1	1	1	1	1	3	1	1	1	2	1	59	LG+C20+F+G
OG0001898	1	2	1	1	1	1	1	3	4	3	1	1	1	3	1	1	3	2	4	1	0	1	2	1	1	1	0	0	1	1	2	1	2	2	1	1	1	1	1	2	1	59	JTT+F+I+G4
OG0001899	1	5	1	1	1	1	1	1	3	1	3	1	1	2	1	1	0	3	4	1	1	1	1	1	2	2	1	1	1	1	1	2	1	1	4	0	1	1	1	1	1	59	LG+C10+F+G
OG0001900	1	1	1	2	1	1	1	2	4	1	1	1	1	2	2	1	1	3	1	1	1	3	5	1	1	1	1	1	1	1	1	1	1	1	2	1	1	1	2	1	2	59	C60
OG0001901	1	4	1	2	1	1	1	1	4	1	1	1	1	2	1	1	2	3	2	1	1	3	2	1	1	1	1	1	1	1	1	3	1	1	1	1	1	1	1	2	1	59	JTT+F+R6
OG0001902	1	3	1	1	1	0	1	1	2	1	1	1	1	4	1	1	3	2	6	1	1	1	0	1	2	1	0	1	3	1	1	1	1	1	2	4	1	1	1	1	1	59	LG+C20+F+G
OG0001903	2	1	1	2	1	2	2	1	2	2	1	1	1	1	1	1	2	1	4	1	1	1	1	2	2	1	1	1	1	2	2	1	2	2	0	1	1	2	2	1	2	59	LG4X
OG0001904	1	5	1	1	1	1	1	1	1	1	2	1	1	1	1	1	1	1	3	2	1	2	2	1	1	1	1	3	4	1	1	1	1	2	1	2	1	1	1	2	1	59	LG+C20+F+G
OG0001905	1	7	1	1	1	1	1	0	1	1	1	1	1	1	2	1	1	1	3	1	3	3	2	1	1	1	1	1	2	3	2	1	2	1	1	1	1	1	1	1	1	59	LG+C40+F+G
OG0001906	1	0	4	2	1	1	1	1	1	1	2	1	1	2	1	1	2	1	3	1	1	0	2	1	2	3	3	1	2	1	1	2	1	1	2	2	2	1	1	1	1	59	JTT+F+G4
OG0001907	1	1	1	1	1	1	3	1	3	1	2	1	1	2	1	1	1	2	1	1	1	3	2	1	1	1	2	4	1	1	2	1	2	1	1	3	1	1	1	1	1	59	LG+C20+F+G
OG0001908	1	4	3	1	1	1	1	3	4	1	2	2	1	3	1	2	1	1	1	1	2	1	2	1	2	1	0	2	2	1	1	1	1	1	0	1	1	1	1	1	1	59	JTT+F+I+G4
OG0001909	1	4	1	1	1	1	2	1	2	1	3	1	1	3	1	1	1	2	3	1	2	2	3	1	1	1	2	2	1	1	1	1	1	1	1	1	1	1	1	1	1	59	LG+C20+F+G
OG0001910	1	4	1	2	1	1	1	1	1	1	1	2	2	2	1	2	2	3	3	1	2	2	2	1	1	1	1	0	1	2	1	1	1	1	2	1	1	1	1	2	1	59	JTT+F+I+G4
OG0001911	2	1	2	2	1	2	2	3	2	2	1	2	1	1	2	1	1	0	2	1	0	1	1	1	1	1	1	0	2	1	3	1	1	2	2	1	2	2	2	1	2	59	C60
OG0001912	1	5	1	1	1	1	2	1	1	1	2	3	1	1	1	1	1	1	3	1	1	2	2	1	1	1	2	3	1	2	1	1	1	1	1	1	1	1	1	1	3	59	LG+C20+F+G
OG0001913	1	3	1	3	3	1	1	1	1	1	1	1	1	2	2	1	1	1	5	0	1	2	3	1	2	1	3	1	1	1	1	1	1	1	2	1	0	1	1	2	1	59	JTT+F+I+G4
OG0001914	1	2	1	1	1	1	1	2	0	1	2	1	1	3	3	1	1	1	3	1	1	1	3	1	1	1	1	2	2	3	1	2	1	1	2	0	2	1	1	3	1	59	JTT+F+I+G4
OG0001915	1	1	2	5	1	1	1	1	2	2	2	1	2	0	1	1	1	1	2	0	1	1	2	1	2	1	0	0	2	1	0	5	1	1	1	3	5	1	1	1	1	59	JTT+F+R4
OG0001916	1	2	2	1	1	1	1	1	1	1	3	1	1	3	1	2	1	1	1	1	1	5	1	1	1	2	3	2	2	1	0	1	1	1	2	1	1	1	2	2	1	59	LG+C50+F+G
OG0001917	1	0	1	2	1	1	1	3	2	1	1	1	2	1	1	2	1	2	4	3	1	2	2	1	2	2	2	0	1	1	1	1	1	2	1	2	1	1	1	1	2	59	JTT+F+I+G4
OG0001918	1	4	1	1	1	1	1	0	3	0	2	1	0	2	1	1	1	3	4	1	2	3	3	1	1	1	2	0	2	1	1	1	1	1	1	4	1	1	1	1	1	59	LG4X
OG0001919	1	7	2	1	0	1	1	1	1	1	2	1	1	2	1	1	1	1	2	1	2	3	2	1	2	1	2	3	2	1	1	1	1	1	1	1	1	1	1	1	1	59	LG+C20+F+G
OG0001920	1	3	0	2	1	1	1	1	1	1	1	1	1	1	1	1	4	2	4	2	2	4	2	1	1	2	1	2	1	1	1	1	1	1	1	1	1	1	1	2	1	59	LG+C40+F+G
OG0001921	1	3	2	1	2	0	1	1	1	2	1	1	1	1	1	3	1	2	1	1	1	2	2	1	1	2	2	3	1	1	2	2	1	1	2	1	3	1	1	1	1	59	LG+C30+F+G
OG0001922	1	1	1	3	1	1	1	2	2	1	1	1	1	3	2	1	1	2	1	1	2	4	3	1	1	3	1	1	2	1	2	0	0	1	2	1	2	1	1	1	1	59	C60
OG0001923	1	1	1	1	1	1	1	1	1	1	2	1	1	2	1	4	1	1	4	1	1	4	3	1	2	1	2	1	1	2	1	2	1	1	1	2	1	1	1	1	1	59	JTT+F+I+G4
OG0001924	1	2	2	1	1	1	1	2	1	1	1	1	1	1	1	1	1	1	4	1	2	2	3	1	1	1	2	3	2	1	1	2	1	0	2	3	1	1	2	1	1	59	JTT+F+I+G4
OG0001925	1	1	1	1	1	2	1	1	1	2	2	1	1	2	4	1	1	1	0	2	2	4	2	1	3	2	1	0	1	1	2	1	1	2	1	3	1	1	1	1	1	59	LG+C20+F+G
OG0001926	1	3	1	3	1	1	4	1	0	2	1	1	3	1	2	1	1	1	5	1	1	0	0	1	2	1	1	1	1	1	2	1	1	2	1	4	1	1	1	1	1	59	JTT+F+I+G4
OG0001927	1	5	1	1	1	1	1	1	2	1	2	1	1	1	2	0	1	2	5	1	1	1	2	1	1	3	4	0	1	1	1	1	1	1	1	3	1	1	1	1	1	59	LG+C20+F+G
OG0001928	1	1	1	1	2	1	1	2	3	1	2	1	1	2	0	1	3	2	4	1	2	2	2	1	1	1	2	2	1	1	1	1	1	2	1	2	1	1	1	1	1	59	LG+C30+F+G
OG0001929	1	1	1	2	2	1	1	2	1	1	1	1	1	2	2	2	1	2	1	1	2	3	3	1	1	1	1	1	4	1	1	1	1	1	3	3	0	1	2	0	1	59	C60
OG0001930	1	0	1	2	3	1	3	1	1	2	3	1	1	2	2	1	1	1	4	1	1	1	3	1	1	2	1	2	2	1	1	1	1	1	1	2	1	1	1	1	1	59	JTT+F+I+G4
OG0001931	1	1	1	1	1	1	1	1	1	2	2	1	1	4	1	1	1	3	4	1	2	1	2	1	1	1	1	2	3	1	1	1	1	1	1	4	1	1	1	1	1	59	LG+C20+F+G
OG0001932	1	4	1	2	1	2	2	1	0	2	0	5	2	1	0	0	1	0	0	1	0	0	0	2	0	3	0	3	2	2	1	1	2	3	0	2	2	2	2	5	1	59	JTT+F+G4
OG0001933	1	3	1	1	2	1	1	0	1	1	2	1	1	1	1	2	1	2	3	1	2	1	4	1	1	3	2	1	2	1	2	1	1	1	1	2	1	1	1	2	1	59	LG+C20+F+G
OG0001934	1	4	1	1	1	1	3	1	3	1	2	1	1	4	1	1	1	1	4	1	1	1	2	2	2	2	2	1	1	1	1	1	1	1	1	1	1	1	1	1	0	59	LG+C20+F+G
OG0001935	1	0	2	2	2	1	3	2	1	2	0	0	0	0	2	3	2	1	8	2	0	0	0	1	0	0	0	1	1	2	2	2	3	2	1	2	2	2	2	2	0	59	LG+C10+F+G
OG0001936	1	1	1	3	1	1	1	1	3	0	2	2	1	3	1	1	2	1	4	1	5	2	2	1	1	1	1	1	1	2	1	0	2	1	1	1	1	1	1	1	1	59	LG+C20+F+G
OG0001937	1	1	3	1	2	1	1	1	1	1	2	1	1	1	1	1	2	0	3	1	2	1	1	1	1	1	0	1	1	3	2	5	2	1	1	1	1	2	2	3	1	59	JTT+F+R3
OG0001938	1	3	1	1	2	1	1	1	1	1	1	1	1	2	1	1	1	1	4	2	1	2	2	1	1	3	2	2	1	1	1	2	1	1	1	4	1	1	1	1	1	59	LG+C20+F+G
OG0001939	1	2	1	1	2	2	1	1	1	1	3	2	1	1	1	1	1	2	4	1	3	0	1	1	1	1	1	2	1	1	1	1	1	2	3	3	1	1	1	2	1	59	JTT+F+I+G4
OG0001940	1	3	1	2	0	1	1	1	1	0	1	1	1	3	5	1	1	1	4	1	3	2	2	1	1	2	1	0	2	2	1	1	1	1	2	2	3	0	0	1	1	59	C60
OG0001941	1	1	1	1	1	1	1	1	1	2	2	1	1	1	2	3	3	2	4	2	0	0	0	1	1	1	1	1	1	7	1	1	2	1	1	3	1	1	1	1	1	59	LG+C20+F+G
OG0001942	0	1	1	2	1	1	1	1	1	2	1	1	1	2	2	1	1	3	1	2	1	3	4	1	1	2	1	1	2	1	2	1	1	1	3	2	1	1	2	1	1	59	C60
OG0001943	0	10	3	0	0	1	1	0	0	0	1	0	1	0	0	1	0	1	2	0	4	7	4	0	0	5	1	0	6	0	1	2	0	1	0	1	3	1	1	0	1	59	JTT+F+G4
OG0001944	0	3	1	1	3	1	2	2	2	1	1	2	1	0	2	2	2	2	3	1	2	1	2	1	2	1	0	1	1	1	1	1	1	1	2	1	2	2	1	2	1	59	LG+C20+F+G
OG0001945	0	2	2	1	2	3	1	1	0	2	0	1	3	0	0	1	4	1	4	2	1	1	0	1	2	1	2	0	2	1	1	2	2	2	1	1	2	2	2	2	1	59	C60
OG0001946	1	4	1	2	1	1	1	1	2	1	1	1	1	2	2	1	1	2	4	3	1	1	3	1	1	1	2	1	1	1	1	1	1	1	1	1	1	1	2	1	1	58	LG+C20+F+G
OG0001947	1	2	1	1	1	1	1	1	2	1	3	1	1	2	1	1	1	1	4	1	1	1	3	1	2	1	2	2	3	1	1	2	1	1	1	2	1	1	1	1	1	58	LG+C20+F+G
OG0001948	1	0	1	0	0	2	6	3	3	3	0	2	0	0	0	1	1	0	4	1	0	0	0	2	0	0	0	0	0	1	3	1	5	6	1	0	0	4	4	0	3	58	LG4X
OG0001949	1	3	1	4	1	1	1	1	1	2	1	1	3	1	1	1	1	3	3	1	1	2	2	1	2	1	1	1	1	1	1	2	2	1	0	1	1	1	1	2	1	58	LG+C20+F+G
OG0001950	3	1	2	1	0	1	1	3	0	1	0	3	1	1	0	0	3	1	1	3	0	2	1	2	2	2	2	1	2	2	2	2	2	1	2	1	1	1	1	2	1	58	LG+C10+F+G
OG0001951	1	4	3	2	1	1	3	1	1	1	1	2	1	2	2	1	1	3	3	1	2	2	2	1	1	1	1	1	1	1	1	1	1	1	0	1	1	1	1	1	1	58	LG+C20+F+G
OG0001952	1	1	1	1	1	1	1	1	1	1	2	1	2	1	1	2	2	2	3	2	4	3	4	1	4	1	0	0	1	1	1	1	1	1	1	1	1	1	1	1	1	58	JTT+F+I+G4
OG0001953	1	2	1	1	1	1	2	1	3	1	2	1	3	1	4	2	1	2	3	1	1	0	0	1	2	0	0	1	4	1	1	1	1	1	2	2	1	1	1	2	1	58	LG+C20+F+G
OG0001954	1	1	1	2	2	1	1	2	1	1	1	1	1	3	2	2	1	1	2	1	1	4	2	1	2	2	1	1	1	2	1	2	1	1	1	1	1	1	1	2	1	58	JTT+F+I+G4
OG0001955	1	4	2	1	2	1	1	1	1	1	2	1	1	1	1	1	2	1	2	1	1	1	1	1	2	2	1	2	2	2	1	1	1	1	3	1	3	1	1	1	1	58	LG+C30+F+G
OG0001956	2	2	2	1	1	1	1	1	3	1	0	1	1	2	3	1	1	3	4	1	0	3	2	1	1	1	2	2	1	1	1	1	1	1	1	1	1	1	1	2	1	58	C60
OG0001957	1	3	1	1	3	1	2	1	1	1	2	1	1	2	1	1	1	1	6	1	2	2	3	1	1	2	2	0	1	1	1	1	1	2	0	2	0	1	1	1	1	58	LG+C20+F+G
OG0001958	2	0	1	0	1	1	6	2	0	2	0	4	0	0	0	5	1	0	7	2	0	0	0	1	0	0	0	2	0	1	3	1	4	6	1	0	1	1	1	2	0	58	LG+C20+F+G
OG0001959	1	3	2	1	2	1	1	1	2	1	1	1	1	2	1	1	2	2	3	1	2	1	2	1	1	1	1	1	1	4	1	1	1	1	1	2	2	1	1	1	1	58	LG+C20+F+G
OG0001960	3	3	1	1	4	1	1	2	2	2	1	1	0	2	1	0	2	2	1	3	1	0	0	3	0	1	3	1	0	1	1	2	2	0	0	0	2	2	2	2	2	58	LG4M
OG0001961	3	1	1	2	1	1	1	3	0	1	1	1	1	2	2	1	2	1	4	2	2	2	0	1	2	1	2	1	1	3	1	1	2	1	1	1	1	1	1	1	1	58	LG+C20+F+G
OG0001962	1	0	0	0	0	5	5	2	5	8	0	4	0	0	0	0	0	0	2	1	0	0	0	3	0	0	0	0	0	1	3	3	4	3	0	0	1	3	2	0	2	58	LG4X
OG0001963	1	4	1	1	2	1	1	1	1	1	1	1	1	2	0	5	1	2	1	1	3	3	2	1	1	1	1	1	1	1	1	1	1	2	1	1	3	1	1	1	1	58	C60
OG0001964	1	6	1	3	1	1	1	1	1	1	1	1	1	3	0	1	1	1	5	1	1	3	2	1	2	1	1	1	1	1	1	1	1	2	2	1	0	1	1	1	1	58	JTT+F+I+G4
OG0001965	1	1	1	1	1	1	1	1	1	1	2	1	1	3	2	2	1	1	2	1	0	0	0	1	1	2	2	4	4	1	1	2	1	1	5	3	1	0	1	1	1	58	LG+C20+F+G
OG0001966	1	2	1	1	1	0	1	1	4	1	2	1	1	4	1	0	1	1	3	1	1	2	0	1	1	3	0	2	3	1	1	4	1	1	2	2	1	1	1	1	1	58	JTT+F+I+G4
OG0001967	2	2	2	0	1	1	1	3	2	2	1	3	1	1	2	0	2	1	1	1	0	0	0	1	1	1	1	0	1	2	2	3	3	1	1	1	1	3	2	2	3	58	LG+C20+F+G
OG0001968	3	1	1	2	1	2	2	2	2	1	0	2	1	0	0	0	5	1	0	1	2	1	0	2	1	1	1	0	1	5	1	2	1	4	1	1	1	2	2	1	1	58	LG+C20+F+G
OG0001969	2	2	2	1	2	1	1	1	3	1	2	1	1	1	0	1	1	2	2	1	3	2	3	1	2	1	0	0	1	2	1	1	1	2	1	4	2	1	1	0	1	58	LG+C20+F+G
OG0001970	1	1	2	1	3	1	1	2	1	2	1	3	1	1	1	1	1	1	2	1	1	1	3	0	1	1	1	1	1	1	3	1	2	3	1	1	1	1	4	1	1	58	LG+C20+F+G
OG0001971	1	1	1	2	1	1	1	2	1	1	1	1	1	2	2	1	1	2	1	1	3	4	3	1	1	1	1	1	2	1	1	1	1	1	2	2	1	1	2	1	2	58	JTT+F+G4
OG0001972	1	0	2	0	2	3	2	2	0	1	0	2	1	0	0	0	2	0	0	2	2	0	1	1	1	3	5	3	4	2	1	2	2	1	2	1	2	1	2	2	0	58	JTT+F+I+G4
OG0001973	1	3	1	1	1	1	0	1	3	1	2	2	1	1	1	2	1	1	5	1	2	1	2	1	1	1	2	3	1	1	1	1	1	1	1	3	1	1	1	1	1	58	JTT+F+I+G4
OG0001974	1	5	1	1	0	1	1	1	1	1	2	1	1	2	1	1	1	1	3	1	2	2	3	1	1	1	1	1	1	2	2	1	1	1	3	3	1	1	1	1	1	58	LG+C30+F+G
OG0001975	1	0	1	1	1	1	1	1	1	1	3	1	1	3	1	2	1	1	6	2	1	1	2	1	2	2	2	1	1	1	1	1	2	1	1	3	1	1	1	1	1	58	JTT+F+I+G4
OG0001976	1	2	1	1	0	1	3	1	1	1	1	1	1	1	1	1	1	1	4	2	2	4	2	1	2	1	2	2	1	1	1	3	1	1	1	2	1	1	1	1	1	58	LG+C20+F+G
OG0001977	1	2	1	1	4	1	1	1	0	2	1	1	1	3	1	2	2	2	1	1	0	0	1	1	1	1	1	3	1	2	1	2	1	2	3	1	1	1	1	2	3	58	LG+C10+F+G
OG0001978	1	2	1	1	1	1	3	1	2	1	1	2	1	1	2	1	1	2	2	2	1	2	2	1	3	2	1	2	1	1	1	1	1	1	2	1	1	1	1	1	0	56	JTT+F+I+G4
OG0001979	1	5	0	1	1	1	1	1	2	1	2	1	1	1	1	2	1	2	4	1	2	1	1	1	1	1	1	4	2	1	1	1	1	1	2	1	1	1	1	2	1	58	C60
OG0001980	3	0	1	3	2	2	2	1	1	1	1	5	7	0	1	1	1	1	1	1	0	0	1	2	1	3	2	0	1	1	1	1	2	1	1	0	1	1	1	2	1	58	LG+C20+F+G
OG0001981	1	2	1	1	1	1	1	1	1	1	2	1	1	2	2	1	5	2	3	1	1	3	3	1	1	2	3	0	1	1	1	1	1	1	1	1	1	0	1	2	1	58	LG+C20+F+G
OG0001982	1	2	1	2	2	1	1	1	1	1	1	2	1	3	2	0	1	1	1	1	5	3	3	1	1	1	1	1	2	1	1	0	1	1	4	1	1	1	1	1	1	58	LG+C20+F+G
OG0001983	1	3	1	1	1	1	1	1	1	1	0	1	1	4	3	1	1	2	5	3	1	0	0	1	2	2	0	2	3	1	1	1	1	1	3	0	1	1	1	2	1	58	LG+C20+F+G
OG0001984	1	5	1	1	1	1	1	2	1	1	2	1	1	3	1	1	5	2	4	0	1	1	3	1	1	1	2	0	1	1	1	1	1	1	1	1	1	1	1	1	1	58	LG+C20+F+G
OG0001985	2	5	2	1	2	3	0	1	0	2	1	0	1	2	0	1	1	0	0	3	0	0	0	0	1	2	1	1	2	2	3	3	2	1	2	2	2	2	3	2	0	58	JTT+F+I+G4
OG0001986	1	5	1	2	1	1	1	1	1	1	3	2	1	1	1	1	1	1	6	1	2	2	3	1	1	1	1	1	1	1	1	1	1	1	1	1	1	1	1	1	1	58	LG+C40+F+G
OG0001987	1	1	1	0	1	1	1	1	0	2	1	1	2	2	1	1	1	4	3	2	1	0	1	2	2	3	1	1	3	1	1	1	3	1	2	2	1	1	1	2	1	58	JTT+F+I+G4
OG0001988	1	1	1	2	1	1	1	2	1	1	1	1	1	2	1	1	1	2	1	1	1	4	5	1	1	1	1	2	3	1	1	1	1	1	2	1	1	1	1	1	2	57	LG4M
OG0001989	1	4	1	1	1	2	4	4	0	3	0	0	1	0	1	2	1	0	0	0	3	1	0	2	0	2	0	0	2	0	2	1	1	3	0	2	2	4	5	0	2	58	JTT+F+I+G4
OG0001990	1	1	1	2	1	1	1	1	1	2	1	1	1	2	2	1	3	2	1	0	1	4	5	1	2	1	1	1	2	1	1	1	1	1	2	1	1	1	1	1	2	58	LG4X
OG0001991	1	4	1	1	2	1	1	1	1	1	3	1	1	2	0	1	1	2	3	3	1	3	2	1	2	1	2	2	1	1	1	1	1	1	1	1	1	1	1	1	1	58	LG+C20+F+G
OG0001992	1	2	1	2	1	2	2	1	2	1	3	1	1	2	1	1	1	2	4	1	3	1	1	1	2	1	1	1	1	2	1	1	1	1	1	1	1	1	1	2	1	58	LG+C20+F+G
OG0001993	1	3	2	2	3	1	1	1	1	1	2	1	1	2	1	2	1	2	3	1	0	0	2	1	2	1	1	1	1	1	1	5	1	1	1	1	1	1	1	2	1	58	LG+C20+F+G
OG0001994	1	1	1	1	1	1	1	1	3	1	3	1	1	2	3	1	1	1	2	1	1	4	4	1	2	1	2	1	1	1	1	1	1	1	1	1	1	1	1	2	1	58	JTT+F+I+G4
OG0001995	1	2	1	1	1	1	2	2	2	1	1	1	1	3	1	1	1	2	4	1	1	3	1	1	2	1	2	1	1	0	1	1	2	1	1	3	1	1	1	2	1	58	JTT+F+I+G4
OG0001996	1	5	2	2	0	1	3	1	0	2	0	3	1	1	2	1	2	0	3	1	0	3	0	2	2	1	1	4	1	2	1	1	1	1	1	1	1	1	1	1	1	58	C60
OG0001997	1	1	1	1	2	2	2	1	3	1	2	1	1	3	1	1	2	1	2	1	2	3	4	1	1	1	1	2	1	1	1	1	1	1	1	1	1	1	1	1	1	58	LG+C20+F+G
OG0001998	1	5	2	1	1	1	1	1	3	1	3	1	1	2	1	1	2	2	2	1	1	0	2	1	1	3	1	2	1	1	1	1	1	1	1	2	1	1	1	1	1	58	LG+C40+F+G
[truncated: 12,989 more rows]
